# Supplementary material for: Global DNA Methylation Analysis Identifies Two Discrete clusters of Pheochromocytoma with Distinct Genomic and Genetic Alterations
Source: PubMed Central journal article supplement (PMC5361146; doi:10.1038/srep44943), 2017-03-22

## **Supplementary materials**

Global DNA Methylation Analysis Identifies Two Discrete clusters of Pheochromocytoma with Distinct Genomic and Genetic Alterations

Samuel Backman<sup>1</sup>, Rajani Maharjan<sup>1</sup>, Alberto Falk-Delgado, Joakim Crona<sup>1</sup>, Kenko Cupisti<sup>2</sup>, Peter Stålberg<sup>1</sup>, Per Hellman<sup>1</sup>, Peyman Björklund<sup>1</sup>

<sup>1</sup> Department of Surgical Sciences, Uppsala University, Uppsala, Sweden

<sup>2</sup> Department of Surgery, Marien-Hospital, Euskirchen, Germany

**Supplementary table 1 – Probes differentially methylated between tumours and normal tissue**

| TargetID   | Normal.AVG_Beta | Pheos.AVG_Beta | Pheos.DiffScore | Pheos.DeltaBeta | SYMBOL     |
|------------|-----------------|----------------|-----------------|-----------------|------------|
| cg13021192 | 0.6005161       | 0.1794109      | -349.1551       | -0.4211051      | CTSZ       |
| cg16179125 | 0.6432001       | 0.2326134      | -349.1551       | -0.4105867      | CTSZ       |
| cg25856811 | 0.7179568       | 0.3252473      | -349.1551       | -0.3927095      | SPRR3      |
| cg26164184 | 0.8149152       | 0.43574        | -349.1551       | -0.3791752      | FCN2       |
| cg14204735 | 0.4661456       | 0.08934068     | -349.1551       | -0.3768049      | CYB561     |
| cg27619475 | 0.5564861       | 0.1947175      | -349.1551       | -0.3617686      | SLC16A5    |
| cg04144768 | 0.6791029       | 0.3180636      | -349.1551       | -0.3610393      | DDC        |
| cg01335367 | 0.5233509       | 0.164579       | -349.1551       | -0.3587719      | C12orf34   |
| cg13726507 | 0.8284182       | 0.470094       | -349.1551       | -0.3583242      | CTAG2      |
| cg06536578 | 0.6501456       | 0.2957369      | -349.1551       | -0.3544087      | JPH4       |
| cg26927807 | 0.6936526       | 0.3424899      | -349.1551       | -0.3511627      | BTBD2      |
| cg22374142 | 0.4976765       | 0.1471041      | -349.1551       | -0.3505723      | HSF4       |
| cg14992108 | 0.7202581       | 0.3699769      | -349.1551       | -0.3502811      | SNTB1      |
| cg26672426 | 0.626225        | 0.2933851      | -349.1551       | -0.3328399      | PTGES      |
| cg20154346 | 0.6379861       | 0.3053585      | -349.1551       | -0.3326276      | RAI2       |
| cg20334738 | 0.6488818       | 0.317371       | -349.1551       | -0.3315108      | MAB21L2    |
| cg08450982 | 0.5887374       | 0.2600167      | -349.1551       | -0.3287207      | NUMBL      |
| cg18149207 | 0.7333511       | 0.4051361      | -349.1551       | -0.328215       | RORC       |
| cg06123346 | 0.6199951       | 0.2936695      | -349.1551       | -0.3263255      | ATP4A      |
| cg25221254 | 0.7264441       | 0.4001243      | -349.1551       | -0.3263199      | ASAH3      |
| cg08573687 | 0.6807172       | 0.3556303      | -349.1551       | -0.3250869      | TH         |
| cg25119415 | 0.687941        | 0.363129       | -349.1551       | -0.3248119      | MNDA       |
| cg01103730 | 0.6973703       | 0.3741394      | -349.1551       | -0.3232309      | IL20       |
| cg21457804 | 0.7505146       | 0.4276943      | -349.1551       | -0.3228202      | CT45-2     |
| cg24024214 | 0.8215494       | 0.4989479      | -349.1551       | -0.3226015      | BTNL8      |
| cg22575540 | 0.7558594       | 0.4382493      | -349.1551       | -0.31761        | TRIM54     |
| cg23815000 | 0.7271953       | 0.4103397      | -349.1551       | -0.3168556      | LCN1       |
| cg15503752 | 0.7297292       | 0.4138848      | -349.1551       | -0.3158444      | ST6GALNAC1 |
| cg06639544 | 0.7385153       | 0.422695       | -349.1551       | -0.3158202      | OR7A5      |
| cg12489960 | 0.6688474       | 0.3554831      | -349.1551       | -0.3133644      | SGCB       |
| cg21948655 | 0.7988736       | 0.4869205      | -349.1551       | -0.3119531      | SMCP       |
| cg14706739 | 0.6925761       | 0.380715       | -349.1551       | -0.3118611      | EPB49      |
| cg15652212 | 0.6933754       | 0.3865155      | -349.1551       | -0.3068599      | FLJ90586   |
| cg18780284 | 0.6813936       | 0.3752761      | -349.1551       | -0.3061175      | SPRR1B     |
| cg05444024 | 0.8518489       | 0.549286       | -349.1551       | -0.3025629      | FUT6       |
| cg07824742 | 0.7590712       | 0.458432       | -349.1551       | -0.3006391      | DBH        |
| cg03602500 | 0.7306974       | 0.432349       | -349.1551       | -0.2983484      | FLJ00060   |
| cg00698688 | 0.8040674       | 0.5080183      | -349.1551       | -0.2960491      | SULT2B1    |
| cg05348870 | 0.7693964       | 0.4755233      | -349.1551       | -0.2938731      | TNFSF14    |
| cg14256699 | 0.8603887       | 0.5675716      | -349.1551       | -0.2928171      | SOST       |

|            |           |           |           |            |           |
|------------|-----------|-----------|-----------|------------|-----------|
| cg08684473 | 0.7483833 | 0.4572159 | -349.1551 | -0.2911673 | LILRB5    |
| cg15711744 | 0.7625234 | 0.4735308 | -349.1551 | -0.2889926 | ANP32D    |
| cg10758292 | 0.7698587 | 0.4819526 | -349.1551 | -0.2879061 | DEFA1     |
| cg04138756 | 0.7806306 | 0.4970625 | -349.1551 | -0.2835681 | SPRR3     |
| cg17357062 | 0.8257549 | 0.542263  | -349.1551 | -0.283492  | FCN1      |
| cg05766474 | 0.818482  | 0.5420715 | -349.1551 | -0.2764105 | CCL16     |
| cg26149550 | 0.7885463 | 0.5170676 | -349.1551 | -0.2714787 | KLK15     |
| cg14333565 | 0.7914666 | 0.5216023 | -349.1551 | -0.2698643 | NRTN      |
| cg21686987 | 0.7764781 | 0.5087843 | -349.1551 | -0.2676938 | CTRB1     |
| cg25813714 | 0.8435937 | 0.583806  | -349.1551 | -0.2597876 | CYP4F12   |
| cg24992780 | 0.7986712 | 0.5393614 | -349.1551 | -0.2593099 | OR7C1     |
| cg14182690 | 0.7908964 | 0.5353193 | -349.1551 | -0.2555771 | RUNX3     |
| cg24407065 | 0.8032658 | 0.5506953 | -349.1551 | -0.2525705 | BLZF1     |
| cg08453096 | 0.8258924 | 0.5820401 | -349.1551 | -0.2438523 | ABCG5     |
| cg08475088 | 0.8484987 | 0.6055449 | -349.1551 | -0.2429538 | NALP9     |
| cg18138484 | 0.8258247 | 0.5832363 | -349.1551 | -0.2425884 | CABP2     |
| cg19561774 | 0.8592458 | 0.6169297 | -349.1551 | -0.2423161 | SLC22A2   |
| cg00644033 | 0.9175664 | 0.6757333 | -349.1551 | -0.2418332 | MUC3B     |
| cg21450627 | 0.8156587 | 0.5749301 | -349.1551 | -0.2407286 | PSD4      |
| cg04132607 | 0.8591244 | 0.6208734 | -349.1551 | -0.238251  | GATA5     |
| cg04816348 | 0.8662676 | 0.6303735 | -349.1551 | -0.235894  | CLEC4G    |
| cg03534410 | 0.8616629 | 0.6293499 | -349.1551 | -0.232313  | TMEM40    |
| cg23514672 | 0.8726774 | 0.6411138 | -349.1551 | -0.2315637 | FLJ32871  |
| cg08314660 | 0.8477555 | 0.6172999 | -349.1551 | -0.2304556 | PKP3      |
| cg17264470 | 0.8543522 | 0.6245466 | -349.1551 | -0.2298056 | FGF21     |
| cg10213812 | 0.8630112 | 0.6346682 | -349.1551 | -0.2283431 | FOXN1     |
| cg00520135 | 0.8555187 | 0.6322072 | -349.1551 | -0.2233115 | TPM1      |
| cg27341860 | 0.891391  | 0.6704241 | -349.1551 | -0.2209669 | OR2L13    |
| cg26473272 | 0.867389  | 0.6469713 | -349.1551 | -0.2204176 | SYT8      |
| cg11113534 | 0.8559733 | 0.6373187 | -349.1551 | -0.2186546 | C20orf70  |
| cg23753610 | 0.9301904 | 0.716409  | -349.1551 | -0.2137814 | DNAHL1    |
| cg07595943 | 0.9167925 | 0.7049012 | -349.1551 | -0.2118913 | LOC161931 |
| cg12582965 | 0.8588696 | 0.6477143 | -349.1551 | -0.2111553 | ATP10A    |
| cg11830061 | 0.9157187 | 0.7105842 | -349.1551 | -0.2051345 | INSL6     |
| cg17741572 | 0.7970396 | 0.546249  | -348.1271 | -0.2507906 | CFB       |
| cg08970446 | 0.8225887 | 0.5878221 | -347.7729 | -0.2347666 | SLC1A7    |
| cg24694549 | 0.6403007 | 0.3240729 | -346.1951 | -0.3162278 | GRIP1     |
| cg13608094 | 0.8641294 | 0.6591082 | -346.0796 | -0.2050212 | CCND1     |
| cg12815142 | 0.6761258 | 0.3708805 | -345.4565 | -0.3052454 | SPAG7     |
| cg01515887 | 0.7287439 | 0.446232  | -339.4385 | -0.2825119 | SAA2      |
| cg26292028 | 0.6899872 | 0.393079  | -337.0683 | -0.2969083 | FLJ37587  |
| cg21372914 | 0.7140282 | 0.4267384 | -336.0137 | -0.2872898 | CLEC4M    |
| cg27377450 | 0.8068079 | 0.5663286 | -335.8326 | -0.2404794 | ARHGEF18  |
| cg10805676 | 0.7133251 | 0.4260627 | -335.2991 | -0.2872624 | MRPL28    |
| cg12513481 | 0.5602626 | 0.2342089 | -335.2858 | -0.3260536 | SCAP1     |

|            |           |           |           |            |           |
|------------|-----------|-----------|-----------|------------|-----------|
| cg15516226 | 0.7981389 | 0.5528566 | -334.8934 | -0.2452822 | BTNL9     |
| cg21277505 | 0.8291306 | 0.6038567 | -332.6728 | -0.225274  | LOC284361 |
| cg18129786 | 0.8098671 | 0.5725743 | -332.2004 | -0.2372928 | ZNF445    |
| cg06244417 | 0.774786  | 0.5175284 | -332.0867 | -0.2572576 | FCN1      |
| cg06832950 | 0.7760125 | 0.5197286 | -331.2612 | -0.2562839 | SPG3A     |
| cg17907567 | 0.6217936 | 0.308522  | -329.6122 | -0.3132716 | HAMP      |
| cg10062065 | 0.6583511 | 0.3547563 | -328.9843 | -0.3035948 | APEG1     |
| cg20373326 | 0.6809996 | 0.3848795 | -328.1474 | -0.2961201 | HSD17B2   |
| cg07792737 | 0.8123163 | 0.5794969 | -323.9589 | -0.2328194 | NPIP      |
| cg19728223 | 0.5383787 | 0.2158357 | -323.65   | -0.322543  | KCNQ1     |
| cg19728577 | 0.7729563 | 0.5182743 | -322.977  | -0.2546819 | GUCA2B    |
| cg02442161 | 0.7531271 | 0.4888845 | -322.0854 | -0.2642426 | PI3       |
| cg20544605 | 0.6577012 | 0.3581229 | -319.5542 | -0.2995783 | SORBS2    |
| cg08626653 | 0.7109996 | 0.4301368 | -318.0329 | -0.2808628 | FLJ37538  |
| cg25203980 | 0.8098795 | 0.5778862 | -317.6818 | -0.2319933 | CENTB5    |
| cg08424423 | 0.8008775 | 0.564241  | -315.9596 | -0.2366365 | CDSN      |
| cg06101324 | 0.4954236 | 0.1754946 | -315.5491 | -0.3199289 | SPRR1A    |
| cg24670715 | 0.4996431 | 0.180294  | -314.2922 | -0.319349  | ANGPT2    |
| cg12456510 | 0.6795629 | 0.3895861 | -313.1729 | -0.2899767 | TFF2      |
| cg10677144 | 0.7112477 | 0.4331146 | -311.9918 | -0.2781331 | MYOM1     |
| cg14696820 | 0.6009493 | 0.2929877 | -309.1959 | -0.3079616 | LCE1A     |
| cg06236276 | 0.7581028 | 0.5040116 | -303.0293 | -0.2540912 | SLC22A2   |
| cg13656062 | 0.7520977 | 0.4953682 | -302.581  | -0.2567295 | CYP4F2    |
| cg03221619 | 0.5532917 | 0.2424317 | -301.7823 | -0.31086   | FCER2     |
| cg14150666 | 0.8354299 | 0.6254576 | -300.6789 | -0.2099723 | IL8RB     |
| cg10990993 | 0.5985331 | 0.2942526 | -300.5915 | -0.3042805 | MLH1      |
| cg16990174 | 0.547488  | 0.2368036 | -300.4214 | -0.3106844 | RYBP      |
| cg22013966 | 0.8409851 | 0.6347732 | -300.2852 | -0.2062119 | SERPINA13 |
| cg07997737 | 0.5722926 | 0.2644956 | -299.8167 | -0.307797  | NRTN      |
| cg22784047 | 0.6865979 | 0.405918  | -297.7694 | -0.2806799 | MVP       |
| cg18508525 | 0.8117525 | 0.5885997 | -297.0598 | -0.2231528 | CD36      |
| cg08471713 | 0.8352556 | 0.627315  | -294.773  | -0.2079406 | MEOX1     |
| cg12619162 | 0.7686013 | 0.523487  | -293.77   | -0.2451143 | FXD4      |
| cg09701102 | 0.7531219 | 0.5009155 | -293.0842 | -0.2522064 | NDUFV1    |
| cg16772207 | 0.620232  | 0.3250083 | -290.4832 | -0.2952237 | MYT1      |
| cg19954000 | 0.5019863 | 0.1944584 | -290.2011 | -0.3075279 | FGF1      |
| cg15928132 | 0.607567  | 0.3105168 | -289.1083 | -0.2970501 | CCKAR     |
| cg04505023 | 0.6997429 | 0.4278599 | -288.4169 | -0.271883  | SPRR1A    |
| cg00334507 | 0.6243029 | 0.3310087 | -288.328  | -0.2932942 | MVP       |
| cg13521229 | 0.5531197 | 0.250439  | -285.2996 | -0.3026807 | JOSD2     |
| cg16122592 | 0.6405548 | 0.3536003 | -282.9391 | -0.2869545 | MAGEB6    |
| cg16462075 | 0.7248219 | 0.464963  | -282.7489 | -0.259859  | MUC3B     |
| cg22294577 | 0.8043756 | 0.5826795 | -282.3722 | -0.2216961 | SLC26A3   |
| cg14162076 | 0.8297534 | 0.6237301 | -280.1606 | -0.2060233 | CLEC4D    |
| cg14894144 | 0.479454  | 0.1783413 | -278.2083 | -0.3011126 | LAMA3     |

|            |           |           |           |            |           |
|------------|-----------|-----------|-----------|------------|-----------|
| cg27285599 | 0.7615805 | 0.5201346 | -277.0762 | -0.2414458 | FLJ13841  |
| cg22264436 | 0.7468928 | 0.498904  | -276.8443 | -0.2479888 | SOST      |
| cg26422060 | 0.7860416 | 0.5569527 | -276.2981 | -0.229089  | TBX10     |
| cg19949550 | 0.7388231 | 0.4879559 | -275.5382 | -0.2508672 | ASB2      |
| cg16175263 | 0.5629296 | 0.2663313 | -275.2727 | -0.2965983 | TNFRSF10C |
| cg10569414 | 0.6894798 | 0.4214381 | -272.7224 | -0.2680417 | C21orf121 |
| cg04323365 | 0.744164  | 0.4970019 | -272.3641 | -0.2471622 | GJB1      |
| cg17820828 | 0.7245404 | 0.4699518 | -270.9458 | -0.2545886 | KCNQ1     |
| cg01827098 | 0.7951075 | 0.5730559 | -270.7866 | -0.2220516 | GIMAP7    |
| cg07126559 | 0.7593099 | 0.5200485 | -269.7197 | -0.2392614 | SGCG      |
| cg14845091 | 0.624664  | 0.3409131 | -269.2831 | -0.283751  | ADPRHL1   |
| cg05485062 | 0.7768545 | 0.5462084 | -269.0728 | -0.2306461 | SERPINA12 |
| cg19807685 | 0.6756111 | 0.4050766 | -268.9254 | -0.2705345 | HSD17B2   |
| cg19917856 | 0.5128558 | 0.2166341 | -268.4885 | -0.2962217 | LOC342897 |
| cg23776892 | 0.7766726 | 0.5462099 | -268.4885 | -0.2304627 | MAGEA1    |
| cg10275770 | 0.4400549 | 0.1471992 | -267.3671 | -0.2928557 | ICAM2     |
| cg06220755 | 0.618116  | 0.3352206 | -265.0085 | -0.2828954 | RAI2      |
| cg04719766 | 0.7839289 | 0.55888   | -264.2481 | -0.2250489 | KCNQ1     |
| cg02067021 | 0.6885798 | 0.424656  | -263.694  | -0.2639238 | DNAJC5B   |
| cg05671018 | 0.679382  | 0.4127809 | -263.2805 | -0.2666011 | LYSMD2    |
| cg22190114 | 0.7153814 | 0.4610602 | -263.0235 | -0.2543212 | NALP8     |
| cg10604646 | 0.5371482 | 0.2448906 | -262.9251 | -0.2922576 | RGS5      |
| cg21065959 | 0.6587805 | 0.3865619 | -262.7348 | -0.2722186 | LCE1E     |
| cg06436504 | 0.6696407 | 0.4006012 | -262.4195 | -0.2690395 | DOC1      |
| cg24363955 | 0.7855654 | 0.5621564 | -262.3993 | -0.223409  | FLJ14054  |
| cg24027679 | 0.7759639 | 0.5478842 | -262.2426 | -0.2280797 | SLC2A7    |
| cg09027725 | 0.6293691 | 0.3505451 | -261.7391 | -0.2788239 | COX4I2    |
| cg14238120 | 0.7126997 | 0.4580835 | -261.649  | -0.2546162 | ELA3A     |
| cg27394486 | 0.8008213 | 0.5857739 | -261.3552 | -0.2150474 | C15orf2   |
| cg25214346 | 0.654166  | 0.3814659 | -261.3472 | -0.2727002 | NR1I3     |
| cg11158374 | 0.7050698 | 0.4481361 | -260.823  | -0.2569337 | TFF2      |
| cg19368582 | 0.6470323 | 0.3729939 | -260.4474 | -0.2740384 | MMRN2     |
| cg23412777 | 0.6425221 | 0.3680225 | -259.1906 | -0.2744996 | PYGO1     |
| cg01718139 | 0.7657939 | 0.5342838 | -259.1583 | -0.2315102 | UNQ3033   |
| cg17240454 | 0.7999614 | 0.5855871 | -258.6842 | -0.2143743 | SPDEF     |
| cg05440289 | 0.7547014 | 0.5186027 | -258.2331 | -0.2360988 | IVL       |
| cg13019092 | 0.7327785 | 0.4881585 | -256.752  | -0.24462   | PDZK1     |
| cg25477904 | 0.8078945 | 0.598575  | -256.7494 | -0.2093195 | PSG1      |
| cg02351381 | 0.4641945 | 0.1754267 | -256.2549 | -0.2887678 | C12orf34  |
| cg05556202 | 0.7580193 | 0.5242994 | -256.2549 | -0.2337198 | TM4SF19   |
| cg13204181 | 0.6311664 | 0.3564085 | -254.6987 | -0.2747579 | GH1       |
| cg27235662 | 0.7571304 | 0.5237268 | -254.6812 | -0.2334036 | CLDN16    |
| cg13578652 | 0.6351296 | 0.3616584 | -253.9177 | -0.2734712 | UBASH3A   |
| cg09299388 | 0.6970874 | 0.4409614 | -253.6384 | -0.256126  | PGK2      |
| cg24824840 | 0.790109  | 0.5729057 | -253.3816 | -0.2172034 | SHANK1    |

|            |           |           |           |            |          |
|------------|-----------|-----------|-----------|------------|----------|
| cg16626670 | 0.6462061 | 0.3759372 | -252.741  | -0.2702689 | CLEC4G   |
| cg26946769 | 0.7810324 | 0.5601134 | -251.5734 | -0.220919  | MAPK4    |
| cg02844051 | 0.7362346 | 0.4955091 | -251.469  | -0.2407255 | ZD52F10  |
| cg25781162 | 0.7540183 | 0.5211482 | -250.5571 | -0.2328701 | ABCG5    |
| cg01015871 | 0.6167418 | 0.341368  | -250.2877 | -0.2753739 | MT4      |
| cg11739626 | 0.7003604 | 0.4473656 | -249.5756 | -0.2529947 | AKT1S1   |
| cg15905124 | 0.7711913 | 0.5466432 | -249.2842 | -0.2245481 | MGC13034 |
| cg15780361 | 0.5513908 | 0.2680345 | -248.4785 | -0.2833562 | ALS2CR11 |
| cg01643624 | 0.726625  | 0.484568  | -246.4133 | -0.2420569 | C11orf16 |
| cg11884243 | 0.7931302 | 0.5804961 | -246.3671 | -0.212634  | FCN2     |
| cg18242139 | 0.7134107 | 0.4666366 | -246.1152 | -0.2467741 | ELAVL4   |
| cg16986846 | 0.5924717 | 0.3168318 | -243.0499 | -0.2756399 | SCGB2A1  |
| cg24490338 | 0.7198963 | 0.4770663 | -242.8263 | -0.24283   | TPM3     |
| cg08341924 | 0.7583263 | 0.5310573 | -242.5137 | -0.227269  | TGM1     |
| cg00321478 | 0.6564969 | 0.3942619 | -242.2571 | -0.262235  | CRB1     |
| cg24735489 | 0.6244857 | 0.3550967 | -241.9299 | -0.2693891 | CDSN     |
| cg08728865 | 0.7916111 | 0.5801899 | -241.8438 | -0.2114213 | NALP7    |
| cg14287742 | 0.7497964 | 0.5192221 | -241.8186 | -0.2305743 | BLZF1    |
| cg19233472 | 0.7223547 | 0.4814174 | -240.8641 | -0.2409373 | FOXI1    |
| cg26063872 | 0.6424041 | 0.3777391 | -240.3909 | -0.264665  | DEFB123  |
| cg17829936 | 0.6854419 | 0.4323488 | -240.3209 | -0.2530931 | TAAR5    |
| cg04431776 | 0.802137  | 0.5972912 | -239.0161 | -0.2048457 | GAGE2    |
| cg03364781 | 0.6811622 | 0.4278127 | -238.3162 | -0.2533495 | ALPK1    |
| cg11719283 | 0.6585968 | 0.3991438 | -238.0435 | -0.2594531 | ZNF574   |
| cg09414535 | 0.6036983 | 0.3330359 | -237.275  | -0.2706623 | GRIP1    |
| cg19042947 | 0.6387034 | 0.3754127 | -236.2824 | -0.2632907 | SERPINA4 |
| cg25915982 | 0.7758661 | 0.5597733 | -235.451  | -0.2160928 | GRB10    |
| cg09467501 | 0.3721131 | 0.1064787 | -235.0825 | -0.2656344 | PYY      |
| cg24901474 | 0.5516204 | 0.2758371 | -234.8556 | -0.2757833 | RGS5     |
| cg19859270 | 0.6829456 | 0.4320296 | -234.7059 | -0.250916  | GPR15    |
| cg06501790 | 0.6680466 | 0.4130271 | -234.4604 | -0.2550195 | SLC34A1  |
| cg08292050 | 0.7579495 | 0.534547  | -234.0612 | -0.2234026 | SOCS4    |
| cg24750391 | 0.4890362 | 0.2116702 | -234.012  | -0.277366  | PON3     |
| cg04953015 | 0.7136792 | 0.4731544 | -233.8791 | -0.2405248 | CHRNA2   |
| cg12334759 | 0.6979702 | 0.4526268 | -232.9682 | -0.2453434 | C19orf19 |
| cg05215575 | 0.5650438 | 0.2916764 | -232.8409 | -0.2733674 | FLJ25410 |
| cg04711324 | 0.5650914 | 0.292681  | -231.1205 | -0.2724104 | RIT2     |
| cg25033144 | 0.7326362 | 0.5007813 | -230.3741 | -0.2318549 | FLJ00060 |
| cg24697329 | 0.7395797 | 0.511025  | -229.1472 | -0.2285548 | ARHGEF4  |
| cg02601403 | 0.7693781 | 0.5535097 | -228.7024 | -0.2158684 | TBC1D3C  |
| cg06351503 | 0.6866283 | 0.4401737 | -228.3482 | -0.2464547 | RDBP     |
| cg07525077 | 0.5739071 | 0.3042197 | -228.0558 | -0.2696874 | RNASE3   |
| cg18729973 | 0.7458268 | 0.5205106 | -227.6294 | -0.2253162 | TFF1     |
| cg19712821 | 0.5667985 | 0.2967039 | -227.3898 | -0.2700946 | KSP37    |
| cg22189286 | 0.6909527 | 0.4466038 | -226.854  | -0.2443489 | HSPB8    |

|            |           |           |           |            |           |
|------------|-----------|-----------|-----------|------------|-----------|
| cg25762706 | 0.5692218 | 0.2998619 | -226.5592 | -0.2693599 | STMN4     |
| cg07651914 | 0.5732188 | 0.3048552 | -225.5858 | -0.2683637 | CLDN15    |
| cg10127415 | 0.5262495 | 0.2543201 | -225.3772 | -0.2719294 | MAGEB6    |
| cg10575735 | 0.6007839 | 0.3363411 | -225.3472 | -0.2644428 | SSX4      |
| cg01657380 | 0.6698722 | 0.4204321 | -225.0013 | -0.2494401 | NPFF      |
| cg02130905 | 0.6067913 | 0.3437373 | -224.6438 | -0.263054  | STMN4     |
| cg18204685 | 0.686089  | 0.4416396 | -224.3099 | -0.2444493 | BTD       |
| cg03458191 | 0.7495673 | 0.5274154 | -224.3099 | -0.2221519 | SAA1      |
| cg09736922 | 0.7911158 | 0.5875998 | -223.8314 | -0.203516  | THPO      |
| cg25778166 | 0.7248582 | 0.4938717 | -222.991  | -0.2309865 | FMO3      |
| cg02833725 | 0.6523967 | 0.3996254 | -222.941  | -0.2527713 | ISG20L2   |
| cg19845843 | 0.7100663 | 0.4739568 | -222.9208 | -0.2361095 | CXorf20   |
| cg15210427 | 0.5148324 | 0.2442842 | -222.3961 | -0.2705482 | CST9L     |
| cg01484156 | 0.5501247 | 0.2814487 | -222.3258 | -0.268676  | NCALD     |
| cg24607398 | 0.5218193 | 0.2516253 | -222.1731 | -0.270194  | MLH1      |
| cg19982860 | 0.6294757 | 0.3721965 | -221.9413 | -0.2572792 | IFNA21    |
| cg00594952 | 0.564952  | 0.2980545 | -221.5884 | -0.2668974 | RIMS3     |
| cg24355048 | 0.6374406 | 0.3823592 | -221.0214 | -0.2550814 | CTSG      |
| cg08448751 | 0.6614423 | 0.4120989 | -220.8683 | -0.2493433 | SEMA3G    |
| cg03609102 | 0.5712318 | 0.3061907 | -219.5488 | -0.2650411 | MUC5B     |
| cg07441143 | 0.6896355 | 0.4493204 | -218.635  | -0.2403151 | SLURP1    |
| cg23829949 | 0.5814235 | 0.3183523 | -218.2275 | -0.2630712 | ZNF238    |
| cg06437862 | 0.7601305 | 0.5455602 | -217.8354 | -0.2145703 | TUBA2     |
| cg05670596 | 0.4878161 | 0.2199822 | -217.6406 | -0.2678339 | CCRL2     |
| cg15743985 | 0.704594  | 0.4694955 | -217.6406 | -0.2350985 | CD22      |
| cg01568736 | 0.7396729 | 0.5170903 | -217.4513 | -0.2225826 | SERPINB7  |
| cg27442349 | 0.6332046 | 0.3792835 | -217.4011 | -0.2539211 | NFKBIB    |
| cg27090216 | 0.3580904 | 0.1053671 | -216.8201 | -0.2527233 | TNFRSF10C |
| cg21495715 | 0.7150798 | 0.4840035 | -216.6504 | -0.2310763 | SLC5A10   |
| cg06811800 | 0.6753246 | 0.4320871 | -216.4894 | -0.2432374 | ATP4B     |
| cg04450876 | 0.7845926 | 0.5816689 | -216.0721 | -0.2029237 | FAM112B   |
| cg23749046 | 0.7882785 | 0.5871783 | -215.8398 | -0.2011002 | GPR61     |
| cg26583078 | 0.6611041 | 0.4145779 | -215.6904 | -0.2465262 | SORBS2    |
| cg13180098 | 0.641979  | 0.3911961 | -215.2183 | -0.2507829 | RHO       |
| cg17687962 | 0.7372782 | 0.5153332 | -214.4634 | -0.221945  | KLK3      |
| cg26264314 | 0.7494335 | 0.5322686 | -214.3382 | -0.2171649 | NALP5     |
| cg23881725 | 0.4296838 | 0.1673783 | -214.1737 | -0.2623055 | DLEC1     |
| cg10052840 | 0.4951251 | 0.229511  | -213.8145 | -0.265614  | SEMA6B    |
| cg15626350 | 0.467462  | 0.2027914 | -213.4234 | -0.2646706 | ESR1      |
| cg18920397 | 0.7027093 | 0.4693266 | -213.3722 | -0.2333827 | LY9       |
| cg22021786 | 0.7114305 | 0.48091   | -213.3426 | -0.2305205 | WFDC8     |
| cg23873703 | 0.7797037 | 0.5760549 | -212.968  | -0.2036488 | KCNAB1    |
| cg00941549 | 0.6680831 | 0.4252146 | -212.3897 | -0.2428685 | AKAP4     |
| cg25372195 | 0.6580823 | 0.4128451 | -212.0971 | -0.2452372 | DCD       |
| cg22510822 | 0.6442158 | 0.3958468 | -211.8973 | -0.2483689 | OR1E2     |

|            |           |           |           |            |           |
|------------|-----------|-----------|-----------|------------|-----------|
| cg11599505 | 0.7650282 | 0.5557978 | -211.3154 | -0.2092304 | C2orf102  |
| cg18979223 | 0.6606013 | 0.4164916 | -211.2176 | -0.2441097 | CDKN2B    |
| cg23444894 | 0.7427903 | 0.5251839 | -210.1671 | -0.2176065 | UNQ5810   |
| cg20551517 | 0.7594296 | 0.5484797 | -210.1052 | -0.2109499 | GIP       |
| cg27020690 | 0.3531938 | 0.1053756 | -210.011  | -0.2478183 | TERC      |
| cg08093398 | 0.6519684 | 0.4065903 | -209.805  | -0.2453781 | PSF1      |
| cg04810997 | 0.6714357 | 0.4314234 | -208.9112 | -0.2400123 | TAS2R60   |
| cg19717150 | 0.6672953 | 0.426462  | -208.452  | -0.2408334 | HNF4A     |
| cg10322876 | 0.6234811 | 0.3730989 | -208.0348 | -0.2503822 | CYP2B6    |
| cg07339138 | 0.5733532 | 0.3157791 | -207.441  | -0.2575741 | CCDC13    |
| cg06277657 | 0.4795639 | 0.2188082 | -206.2004 | -0.2607557 | DGKI      |
| cg07597976 | 0.5852943 | 0.330036  | -205.9719 | -0.2552584 | CD19      |
| cg23260026 | 0.506326  | 0.2455377 | -205.9154 | -0.2607883 | FSTL3     |
| cg22194129 | 0.5891984 | 0.3345531 | -205.8387 | -0.2546452 | CLEC4C    |
| cg09542291 | 0.7694307 | 0.5652779 | -204.897  | -0.2041528 | SMCP      |
| cg05912121 | 0.6600023 | 0.4197485 | -204.2111 | -0.2402538 | TH        |
| cg12022621 | 0.5507392 | 0.2929759 | -204.206  | -0.2577634 | LAX1      |
| cg02423618 | 0.5915165 | 0.3385462 | -203.5699 | -0.2529702 | SPATA8    |
| cg10779183 | 0.7421809 | 0.5277917 | -203.5699 | -0.2143893 | ELA3A     |
| cg18063149 | 0.6902608 | 0.4585783 | -203.4422 | -0.2316824 | FMO3      |
| cg15996947 | 0.6176445 | 0.3691847 | -202.9583 | -0.2484598 | L2HGDH    |
| cg15589427 | 0.7345403 | 0.5176773 | -202.8995 | -0.216863  | MUC4      |
| cg04574507 | 0.6489264 | 0.4068885 | -202.8293 | -0.2420379 | CD1B      |
| cg18533225 | 0.6892558 | 0.4576339 | -202.8293 | -0.2316219 | KLHDC7B   |
| cg02882813 | 0.7654443 | 0.5610455 | -202.0898 | -0.2043988 | CST5      |
| cg00756887 | 0.685461  | 0.4532082 | -202.0223 | -0.2322529 | PVRL4     |
| cg00689010 | 0.6543227 | 0.4142365 | -201.6145 | -0.2400862 | NCSTN     |
| cg15983538 | 0.745829  | 0.5341644 | -201.0405 | -0.2116647 | SEMA4A    |
| cg13694749 | 0.6845574 | 0.4531068 | -200.1647 | -0.2314506 | SCN4A     |
| cg16051685 | 0.7352245 | 0.5200791 | -200.1647 | -0.2151453 | TRIM63    |
| cg25072962 | 0.6253342 | 0.3800659 | -200.0122 | -0.2452683 | MGC35295  |
| cg03468463 | 0.6458012 | 0.404833  | -199.8296 | -0.2409682 | SERPINB12 |
| cg24851490 | 0.5042468 | 0.2473683 | -199.5597 | -0.2568786 | RNASE2    |
| cg17778867 | 0.6763697 | 0.4433345 | -199.0074 | -0.2330353 | KRTAP10-8 |
| cg01663968 | 0.3435176 | 0.1041754 | -198.8416 | -0.2393422 | CTSZ      |
| cg15422147 | 0.6884536 | 0.4594133 | -197.874  | -0.2290402 | SERPINB5  |
| cg03782453 | 0.3843829 | 0.1379444 | -197.6023 | -0.2464385 | FLJ90575  |
| cg00622552 | 0.379416  | 0.1344813 | -196.4488 | -0.2449348 | ODF3L1    |
| cg13960126 | 0.6412276 | 0.4013687 | -196.2791 | -0.2398589 | CRB3      |
| cg23580945 | 0.7498689 | 0.5423081 | -196.1974 | -0.2075608 | FLJ43826  |
| cg08555657 | 0.7449159 | 0.5355642 | -196.0305 | -0.2093517 | SPRR2E    |
| cg16242770 | 0.7622209 | 0.5597631 | -195.7514 | -0.2024577 | KRTAP17-1 |
| cg00042156 | 0.5952918 | 0.3476501 | -195.7369 | -0.2476417 | MGC16291  |
| cg12069042 | 0.6789856 | 0.4486949 | -195.494  | -0.2302907 | PLXNB1    |
| cg02324920 | 0.5251739 | 0.271412  | -195.3787 | -0.2537619 | NEURL     |



|            |           |           |           |            |           |
|------------|-----------|-----------|-----------|------------|-----------|
| cg00392257 | 0.6029352 | 0.3568412 | -195.0708 | -0.246094  | ISG20L2   |
| cg27418851 | 0.6592104 | 0.4242415 | -194.9129 | -0.234969  | MBL2      |
| cg01774645 | 0.682514  | 0.4536377 | -194.73   | -0.2288762 | ARHGAP30  |
| cg14366490 | 0.6375582 | 0.3979723 | -194.6147 | -0.2395859 | TXNL6     |
| cg10894512 | 0.6339787 | 0.3942764 | -193.5892 | -0.2397023 | ACTA2     |
| cg14179628 | 0.6389529 | 0.4002855 | -193.5588 | -0.2386673 | TCEAL7    |
| cg12951282 | 0.6104448 | 0.3665026 | -193.5359 | -0.2439422 | ASGR2     |
| cg25013053 | 0.6971928 | 0.4733745 | -193.2639 | -0.2238184 | UNC45B    |
| cg01530101 | 0.6279835 | 0.3874658 | -193.039  | -0.2405177 | KCNQ1DN   |
| cg15531099 | 0.5362542 | 0.2846212 | -192.8764 | -0.251633  | LCE1D     |
| cg19111262 | 0.5239811 | 0.2718823 | -192.7185 | -0.2520988 | IGSF9     |
| cg15542496 | 0.7282554 | 0.5147417 | -192.7144 | -0.2135137 | PIP       |
| cg18056600 | 0.3649402 | 0.125059  | -192.3996 | -0.2398812 | ZMYND15   |
| cg27257987 | 0.6470209 | 0.4111471 | -191.8184 | -0.2358738 | PSG4      |
| cg01982597 | 0.682607  | 0.4554784 | -191.8184 | -0.2271286 | PGBD3     |
| cg09426307 | 0.647449  | 0.4117493 | -191.6891 | -0.2356997 | SEC14L3   |
| cg24852661 | 0.3907833 | 0.1472487 | -191.2217 | -0.2435345 | GOLPH2    |
| cg20189782 | 0.7097399 | 0.491111  | -190.9209 | -0.2186289 | MGC27121  |
| cg19717326 | 0.4473534 | 0.1980299 | -190.4245 | -0.2493235 | MYADM     |
| cg04048249 | 0.6578084 | 0.4258133 | -189.4161 | -0.2319951 | APOC3     |
| cg04457051 | 0.6049128 | 0.3626765 | -189.3793 | -0.2422363 | SCOC      |
| cg18121684 | 0.6801006 | 0.4539918 | -188.9359 | -0.2261088 | SERPINB13 |
| cg20011352 | 0.3544226 | 0.1189879 | -188.3634 | -0.2354347 | GPR124    |
| cg21970438 | 0.7576416 | 0.5573325 | -188.3066 | -0.2003091 | TLL2      |
| cg10883352 | 0.6726032 | 0.4449122 | -188.2974 | -0.2276911 |           |
| cg26353877 | 0.7535778 | 0.5524481 | -186.9155 | -0.2011297 | APCS      |
| cg08603768 | 0.6560817 | 0.4252316 | -186.877  | -0.23085   | WNT8A     |
| cg24884084 | 0.4305283 | 0.1852645 | -186.1853 | -0.2452638 | SPRR1B    |
| cg20311730 | 0.6280743 | 0.3918157 | -186.1501 | -0.2362586 | NALP10    |
| cg07484827 | 0.5007538 | 0.2525204 | -185.9071 | -0.2482334 | CHRNA10   |
| cg10071275 | 0.5805405 | 0.3373369 | -185.643  | -0.2432036 | MYT1      |
| cg14662756 | 0.6447378 | 0.4124581 | -185.0998 | -0.2322798 | NPFF      |
| cg06233503 | 0.5640055 | 0.3194705 | -184.9828 | -0.244535  | KCNQ1     |
| cg25957124 | 0.5272189 | 0.2802694 | -184.862  | -0.2469495 | DNAH3     |
| cg20649991 | 0.7353776 | 0.5287659 | -184.7594 | -0.2066116 | LILRB5    |
| cg12339029 | 0.7264883 | 0.5169507 | -184.5264 | -0.2095376 | MYL1      |
| cg07408456 | 0.6066627 | 0.3677737 | -184.4929 | -0.2388889 | PGLYRP2   |
| cg04962134 | 0.600041  | 0.360336  | -184.21   | -0.2397051 | TRIM51    |
| cg24825722 | 0.5957175 | 0.355834  | -183.519  | -0.2398835 | ACADVL    |
| cg26581729 | 0.4526273 | 0.2075006 | -183.2974 | -0.2451267 | NPDC1     |
| cg19384697 | 0.5005838 | 0.2541056 | -183.2231 | -0.2464781 | UPK3B     |
| cg01074640 | 0.6469871 | 0.4165729 | -182.894  | -0.2304142 | IFNA17    |
| cg07967308 | 0.6294427 | 0.3955495 | -182.8102 | -0.2338932 | ACP5      |
| cg25710140 | 0.6906511 | 0.4712271 | -182.5639 | -0.219424  | MID1      |
| cg02717866 | 0.6514395 | 0.4222467 | -182.4948 | -0.2291928 | FLJ32771  |

|            |           |            |           |            |          |
|------------|-----------|------------|-----------|------------|----------|
| cg17192247 | 0.3573814 | 0.1251042  | -182.2415 | -0.2322772 | MAPRE3   |
| cg15060813 | 0.5094273 | 0.2639813  | -181.7884 | -0.245446  | LRFN3    |
| cg19047670 | 0.6686655 | 0.4443225  | -181.1409 | -0.224343  | CCND1    |
| cg02187357 | 0.6349444 | 0.403676   | -180.3298 | -0.2312684 | TBC1D22B |
| cg25400358 | 0.5628049 | 0.3212322  | -180.2983 | -0.2415727 | GPR137   |
| cg18530716 | 0.3409466 | 0.1133489  | -180.0597 | -0.2275977 | SLC16A11 |
| cg25101056 | 0.6888835 | 0.4706154  | -179.8416 | -0.2182682 | KCNG4    |
| cg01772980 | 0.6239709 | 0.391134   | -179.5767 | -0.2328368 | SCGB1D1  |
| cg12113132 | 0.5475886 | 0.3053133  | -179.5094 | -0.2422753 | CCNDBP1  |
| cg07412254 | 0.631498  | 0.4003092  | -179.1762 | -0.2311888 | FLJ14816 |
| cg01726767 | 0.6185221 | 0.3856026  | -178.1981 | -0.2329195 | LALBA    |
| cg25882366 | 0.3844072 | 0.1500984  | -178.0105 | -0.2343088 | HOXB2    |
| cg06539449 | 0.7392992 | 0.5380074  | -177.8252 | -0.2012919 | CCND1    |
| cg23131950 | 0.7224598 | 0.5155614  | -177.6731 | -0.2068984 | AP2S1    |
| cg12970084 | 0.677856  | 0.4579777  | -177.6676 | -0.2198782 | ELF3     |
| cg12850636 | 0.7149763 | 0.5057625  | -177.5564 | -0.2092139 | TJP3     |
| cg11070419 | 0.5480133 | 0.3075119  | -176.8403 | -0.2405014 | C4BPA    |
| cg09448880 | 0.6389734 | 0.4108276  | -176.6613 | -0.2281458 | PGLYRP3  |
| cg13271951 | 0.5252445 | 0.2836718  | -176.5957 | -0.2415726 | FAM57B   |
| cg08244028 | 0.6530562 | 0.4279732  | -176.5101 | -0.225083  | MSH3     |
| cg08972170 | 0.5567054 | 0.3177987  | -175.4283 | -0.2389067 | Ells1    |
| cg05093686 | 0.4766409 | 0.2359651  | -174.8665 | -0.2406758 | MAB21L1  |
| cg00626119 | 0.5367865 | 0.2970187  | -174.672  | -0.2397678 | NTRK1    |
| cg09300114 | 0.466732  | 0.2268877  | -174.13   | -0.2398443 | SLC16A5  |
| cg22341310 | 0.4293335 | 0.1925653  | -173.2506 | -0.2367682 | ZNF541   |
| cg24331162 | 0.7144635 | 0.5079948  | -172.5983 | -0.2064686 | SYT8     |
| cg03973663 | 0.4318539 | 0.1954147  | -172.3968 | -0.2364392 | LYN      |
| cg21038703 | 0.6577138 | 0.4362686  | -172.3451 | -0.2214452 | ASB16    |
| cg12061127 | 0.6687647 | 0.449944   | -172.2692 | -0.2188207 | WFDC9    |
| cg06531741 | 0.5358245 | 0.2979478  | -171.7657 | -0.2378768 | HTR3B    |
| cg01305625 | 0.5286632 | 0.290565   | -171.5856 | -0.2380982 | PDLIM4   |
| cg19910382 | 0.5956088 | 0.3636262  | -171.3633 | -0.2319826 | FABP1    |
| cg03752885 | 0.5251481 | 0.287275   | -171.0334 | -0.2378731 | DAPK3    |
| cg01993576 | 0.3897566 | 0.1591268  | -171.0068 | -0.2306298 | SLC29A1  |
| cg24429836 | 0.459862  | 0.2224433  | -170.9769 | -0.2374187 | LDHD     |
| cg00714377 | 0.3978373 | 0.1661512  | -170.9214 | -0.2316861 | SLA2     |
| cg15842430 | 0.627858  | 0.4014112  | -170.7227 | -0.2264468 | FAM12B   |
| cg04488758 | 0.6615677 | 0.4427364  | -169.6075 | -0.2188313 | USP44    |
| cg09546307 | 0.6743965 | 0.4586313  | -169.5993 | -0.2157652 | CLEC4D   |
| cg08260891 | 0.2960796 | 0.08571782 | -169.3248 | -0.2103618 | PPGB     |
| cg18473117 | 0.6979352 | 0.4888738  | -168.8327 | -0.2090614 | CCDC22   |
| cg20488657 | 0.6912975 | 0.4805511  | -168.5854 | -0.2107464 | TFF3     |
| cg22970435 | 0.3588514 | 0.1351392  | -168.1033 | -0.2237123 | SPATS1   |
| cg23278885 | 0.7050881 | 0.4985411  | -168.0739 | -0.2065469 | TGM6     |
| cg18396533 | 0.4189331 | 0.1866291  | -168.0517 | -0.232304  | DYDC1    |

|            |           |            |           |            |           |
|------------|-----------|------------|-----------|------------|-----------|
| cg11161873 | 0.535502  | 0.300372   | -167.6762 | -0.23513   | FLJ39575  |
| cg03379131 | 0.2859704 | 0.07941443 | -167.5633 | -0.206556  | ADAM15    |
| cg06385087 | 0.2887798 | 0.08159076 | -167.3418 | -0.207189  | CTSZ      |
| cg16272420 | 0.7207115 | 0.5194365  | -167.2311 | -0.2012749 | PNLIPRP2  |
| cg19055231 | 0.2775417 | 0.07359323 | -167.2229 | -0.2039484 | STAC      |
| cg24489034 | 0.6910307 | 0.4811361  | -167.1587 | -0.2098947 | LW-1      |
| cg25982743 | 0.437015  | 0.2038067  | -166.9709 | -0.2332083 | TIMP4     |
| cg03003745 | 0.590077  | 0.3606759  | -166.4518 | -0.2294011 | UNQ473    |
| cg17788013 | 0.6975147 | 0.4902155  | -165.831  | -0.2072992 | SPINK5    |
| cg12775613 | 0.6292081 | 0.4063885  | -165.5925 | -0.2228196 | HTR1F     |
| cg26796190 | 0.2745275 | 0.07254623 | -165.3597 | -0.2019813 | PYY       |
| cg15741706 | 0.6950621 | 0.4875338  | -165.1276 | -0.2075283 | CXorf48   |
| cg19903229 | 0.5354032 | 0.302058   | -165.1186 | -0.2333452 | C14orf105 |
| cg05569220 | 0.5804387 | 0.3508244  | -165.0798 | -0.2296143 | FLJ44861  |
| cg00750606 | 0.5394855 | 0.3064509  | -164.9978 | -0.2330346 | CDA       |
| cg06303238 | 0.6522335 | 0.4347643  | -164.3755 | -0.2174692 | SALL4     |
| cg02812142 | 0.6484491 | 0.4305395  | -163.8193 | -0.2179096 | ACMSD     |
| cg04655481 | 0.7019932 | 0.4973483  | -163.6068 | -0.2046449 | GPR21     |
| cg00895324 | 0.7060616 | 0.5027089  | -163.4087 | -0.2033527 | PCP4      |
| cg04337944 | 0.4786991 | 0.245835   | -163.3021 | -0.2328641 | FBLN1     |
| cg04273431 | 0.3890684 | 0.1641052  | -162.5736 | -0.2249632 | PRR3      |
| cg21639401 | 0.6639407 | 0.4506229  | -161.9144 | -0.2133178 | FLJ31222  |
| cg06818777 | 0.3566888 | 0.13799    | -160.9751 | -0.2186988 | CHAD      |
| cg26420196 | 0.4721264 | 0.2411671  | -160.7584 | -0.2309592 | GAS6      |
| cg05636175 | 0.4301497 | 0.2018363  | -160.56   | -0.2283134 | TNFRSF10C |
| cg05600717 | 0.3065997 | 0.0989812  | -160.405  | -0.2076185 | FLJ13639  |
| cg01550148 | 0.5474311 | 0.3180721  | -160.3305 | -0.2293591 | H2AFY     |
| cg04567009 | 0.5921081 | 0.3671353  | -160.2795 | -0.2249728 | FCGR3B    |
| cg14911395 | 0.4709089 | 0.2404331  | -160.1345 | -0.2304758 | SEMA3B    |
| cg26884581 | 0.3973826 | 0.1729121  | -160.1345 | -0.2244705 | PYGM      |
| cg10414946 | 0.6309593 | 0.4120933  | -160.1164 | -0.218866  | MS4A2     |
| cg03343942 | 0.5368052 | 0.3077216  | -159.0457 | -0.2290835 | SLC39A5   |
| cg24477636 | 0.5621782 | 0.3351369  | -158.6557 | -0.2270413 | OR10H1    |
| cg07922606 | 0.4949563 | 0.2652697  | -158.3927 | -0.2296866 | HIST1H3E  |
| cg08402568 | 0.6543597 | 0.441252   | -158.3927 | -0.2131077 | MGC34647  |
| cg19000186 | 0.668666  | 0.4588057  | -158.2968 | -0.2098603 | CNGA1     |
| cg13126790 | 0.6797944 | 0.4726199  | -158.2845 | -0.2071745 | FLJ27255  |
| cg22228134 | 0.5810493 | 0.3563382  | -158.0062 | -0.2247111 | GZMH      |
| cg20576002 | 0.6086753 | 0.3876974  | -157.8225 | -0.2209779 | FAM112B   |
| cg24628744 | 0.4040718 | 0.1804474  | -157.6956 | -0.2236244 | H2AFY     |
| cg07643942 | 0.5621251 | 0.3360526  | -157.2767 | -0.2260725 | LACRT     |
| cg21402035 | 0.6022036 | 0.3807133  | -157.2247 | -0.2214903 | GALR3     |
| cg07977490 | 0.6888297 | 0.484895   | -156.8355 | -0.2039347 | C16orf45  |
| cg18881269 | 0.6443889 | 0.4305101  | -156.4996 | -0.2138788 | LEPREL2   |
| cg01837574 | 0.535157  | 0.3078603  | -156.3964 | -0.2272967 | TRAPPC1   |

|            |           |           |           |            |           |
|------------|-----------|-----------|-----------|------------|-----------|
| cg27566805 | 0.4902384 | 0.2621932 | -156.1122 | -0.2280452 | USH2A     |
| cg00350478 | 0.6046786 | 0.3843304 | -156.0766 | -0.2203482 | FRMD1     |
| cg05654163 | 0.6304811 | 0.4144872 | -155.7726 | -0.215994  | SLC39A2   |
| cg06275635 | 0.5588427 | 0.3336254 | -155.6891 | -0.2252172 | PGLYRP3   |
| cg16545105 | 0.6570615 | 0.44682   | -155.0011 | -0.2102415 | CRHBP     |
| cg14740251 | 0.6919519 | 0.4909695 | -153.5319 | -0.2009824 | SIGLEC5   |
| cg21432842 | 0.5382873 | 0.3132383 | -153.4712 | -0.225049  | CSF3      |
| cg10125195 | 0.6904398 | 0.4892444 | -153.2602 | -0.2011954 | LACRT     |
| cg10586756 | 0.6810052 | 0.4776083 | -152.9786 | -0.2033969 | NUP93     |
| cg24541550 | 0.5734241 | 0.3516374 | -152.6987 | -0.2217867 | MRV11     |
| cg08996986 | 0.6781263 | 0.4745287 | -152.2007 | -0.2035976 | EPS8L1    |
| cg03291145 | 0.6444508 | 0.4335856 | -152.0665 | -0.2108652 | ARSF      |
| cg24693053 | 0.4704029 | 0.2462509 | -151.2278 | -0.224152  | MFSD7     |
| cg21755709 | 0.477071  | 0.2527786 | -151.1574 | -0.2242924 | C21orf124 |
| cg00518911 | 0.5139667 | 0.2898824 | -150.8174 | -0.2240843 | HOXA10    |
| cg10837843 | 0.351329  | 0.140456  | -150.6941 | -0.210873  | DUSP1     |
| cg26415633 | 0.4676159 | 0.2440923 | -150.4931 | -0.2235236 | KLK1      |
| cg22083047 | 0.483888  | 0.2600347 | -150.3575 | -0.2238533 | PRICKLE2  |
| cg01861509 | 0.6773669 | 0.4748544 | -150.3121 | -0.2025125 | SPOCK2    |
| cg27337148 | 0.4365545 | 0.2152393 | -149.8521 | -0.2213152 | CAMK1G    |
| cg15903395 | 0.6549752 | 0.4478197 | -149.7648 | -0.2071555 | FLJ25369  |
| cg13552869 | 0.3978889 | 0.1807334 | -149.4324 | -0.2171555 | SEZ6L2    |
| cg18988110 | 0.4603425 | 0.237967  | -149.3174 | -0.2223755 | ATAD4     |
| cg11939496 | 0.6582251 | 0.452121  | -149.2336 | -0.206104  | CD244     |
| cg12781568 | 0.556967  | 0.3363344 | -149.0491 | -0.2206326 | WT1       |
| cg25020204 | 0.5781268 | 0.3598342 | -148.5029 | -0.2182926 | DBH       |
| cg14107638 | 0.6763214 | 0.4749922 | -148.187  | -0.2013293 | MAGEA5    |
| cg15303841 | 0.6011094 | 0.3858882 | -148.076  | -0.2152212 | RFPL1     |
| cg10787197 | 0.5716727 | 0.3530416 | -148.0645 | -0.2186311 | C6orf105  |
| cg04968473 | 0.5577998 | 0.3380138 | -147.9757 | -0.2197859 | CYP1A2    |
| cg04891836 | 0.644649  | 0.4369641 | -147.5338 | -0.2076849 | TNFSF14   |
| cg17217677 | 0.6465526 | 0.4392577 | -147.5098 | -0.2072949 | SMPD3     |
| cg15590780 | 0.4973402 | 0.2755506 | -147.4011 | -0.2217896 | USH2A     |
| cg19841506 | 0.3476608 | 0.1397175 | -147.3861 | -0.2079433 | ZMYND15   |
| cg24816455 | 0.4781379 | 0.2572576 | -146.4137 | -0.2208803 | SEMA3B    |
| cg03544379 | 0.4923198 | 0.2712615 | -146.3941 | -0.2210583 | OR7C2     |
| cg02218324 | 0.6499814 | 0.4441688 | -146.3364 | -0.2058127 | RSHL1     |
| cg03548857 | 0.4611185 | 0.2410386 | -146.0997 | -0.2200799 | FFAR2     |
| cg03453449 | 0.6149181 | 0.4031622 | -145.9963 | -0.2117559 | USP44     |
| cg03104936 | 0.6382935 | 0.4305624 | -145.8713 | -0.2077311 | GRB10     |
| cg08403419 | 0.647118  | 0.4411996 | -145.6701 | -0.2059183 | RLN3R2    |
| cg13053608 | 0.5109901 | 0.2912985 | -144.6977 | -0.2196916 | LGP1      |
| cg00436603 | 0.5485989 | 0.3305493 | -144.6597 | -0.2180497 | CYP2E1    |
| cg24910675 | 0.4141111 | 0.198589  | -144.5577 | -0.2155221 | ENG       |
| cg05112299 | 0.4981154 | 0.2784458 | -144.5004 | -0.2196697 | OR7A17    |

|            |           |           |           |            |           |
|------------|-----------|-----------|-----------|------------|-----------|
| cg19006008 | 0.6371928 | 0.4303488 | -144.3388 | -0.206844  | F2RL3     |
| cg05822532 | 0.5405232 | 0.3229848 | -143.281  | -0.2175383 | ELN       |
| cg20713492 | 0.3306163 | 0.1291897 | -142.6242 | -0.2014266 | AQP10     |
| cg11435943 | 0.5192146 | 0.3014214 | -142.3919 | -0.2177933 | SERPINB12 |
| cg23413307 | 0.6441457 | 0.4399536 | -142.3819 | -0.204192  | LCE1F     |
| cg13320683 | 0.6621972 | 0.4616855 | -142.3288 | -0.2005117 | RHOBTB1   |
| cg17095731 | 0.6429132 | 0.4386792 | -142.1121 | -0.2042341 | LRP8      |
| cg07115820 | 0.5770056 | 0.3632423 | -142.0806 | -0.2137633 | EPX       |
| cg06720660 | 0.6033224 | 0.392796  | -141.9514 | -0.2105263 | RNASE6    |
| cg24919884 | 0.657968  | 0.4569189 | -141.8341 | -0.2010491 | ARHGEF16  |
| cg16673198 | 0.6375206 | 0.4326599 | -141.6117 | -0.2048607 | CPNE4     |
| cg17910564 | 0.57946   | 0.3665345 | -141.2933 | -0.2129254 | VDAC3     |
| cg13125510 | 0.4704025 | 0.2536251 | -141.1607 | -0.2167774 | C11orf44  |
| cg11584690 | 0.3612086 | 0.1551923 | -141.1607 | -0.2060163 | ZNF574    |
| cg01970325 | 0.5379469 | 0.322032  | -140.9426 | -0.2159149 | NELF      |
| cg23458892 | 0.6534544 | 0.4522171 | -140.8156 | -0.2012373 | SIGLEC7   |
| cg08878744 | 0.5153375 | 0.2986611 | -140.8053 | -0.2166763 | LCE1B     |
| cg10370591 | 0.6195087 | 0.4126323 | -140.2206 | -0.2068765 | TPO       |
| cg08859675 | 0.6306909 | 0.4256767 | -140.1799 | -0.2050142 | PDE4A     |
| cg12351042 | 0.6480422 | 0.446734  | -139.4052 | -0.2013082 | OR2B2     |
| cg27622610 | 0.5085348 | 0.2932111 | -138.8131 | -0.2153237 | OR1G1     |
| cg23047271 | 0.3377871 | 0.1376363 | -138.7522 | -0.2001508 | PRICKLE2  |
| cg03956628 | 0.3994637 | 0.1900484 | -138.3916 | -0.2094153 | MLH1      |
| cg11750883 | 0.5592771 | 0.3468403 | -138.2003 | -0.2124367 | C1orf42   |
| cg15005385 | 0.56929   | 0.3578518 | -138.0088 | -0.2114382 | CCL3L1    |
| cg21453309 | 0.4336165 | 0.2214619 | -137.6471 | -0.2121546 | FAM101A   |
| cg14034870 | 0.5837391 | 0.3740469 | -137.6212 | -0.2096922 | SFTPG     |
| cg26189983 | 0.3507454 | 0.1493924 | -137.1079 | -0.201353  | TNFRSF1B  |
| cg07676849 | 0.5856572 | 0.3768139 | -136.7584 | -0.2088433 | FOLR3     |
| cg11052143 | 0.4073675 | 0.1983978 | -136.5977 | -0.2089697 | ALS2CR11  |
| cg09492887 | 0.3482586 | 0.1481997 | -135.9145 | -0.2000589 | SLC26A5   |
| cg01637734 | 0.6175476 | 0.4139752 | -135.3356 | -0.2035724 | CD5L      |
| cg17582777 | 0.6193945 | 0.416173  | -135.2439 | -0.2032215 | EFNA3     |
| cg19033555 | 0.5863889 | 0.3790877 | -134.8257 | -0.2073013 | DEFB1     |
| cg26661623 | 0.6339096 | 0.4334872 | -134.663  | -0.2004225 | ASGR2     |
| cg09971646 | 0.4091354 | 0.2020427 | -133.8322 | -0.2070927 | DLK1      |
| cg12970081 | 0.5756982 | 0.3680547 | -133.8075 | -0.2076435 | GPR32     |
| cg02157083 | 0.6308148 | 0.4305044 | -133.8075 | -0.2003103 | APOA5     |
| cg08815403 | 0.5746841 | 0.3671961 | -133.4756 | -0.2074881 | HSD17B13  |
| cg19421752 | 0.3997418 | 0.1941053 | -133.2664 | -0.2056364 | SLC6A18   |
| cg15782391 | 0.5685586 | 0.3607983 | -133.0811 | -0.2077602 | ACPT      |
| cg07220939 | 0.6247531 | 0.423998  | -133.0695 | -0.2007551 | SLC22A12  |
| cg06489008 | 0.55329   | 0.3443721 | -133.0051 | -0.2089179 | CST11     |
| cg22971191 | 0.516776  | 0.3062426 | -132.8187 | -0.2105333 | SLC10A2   |
| cg14036856 | 0.5625836 | 0.3550135 | -132.169  | -0.2075702 | MGC52423  |

|            |           |           |           |            |           |
|------------|-----------|-----------|-----------|------------|-----------|
| cg26218269 | 0.4887733 | 0.2787361 | -131.8541 | -0.2100372 | MAB21L2   |
| cg08157292 | 0.5814134 | 0.3758841 | -131.8033 | -0.2055293 | PPP1R7    |
| cg18223379 | 0.5193044 | 0.3100426 | -131.265  | -0.2092618 | BPIL3     |
| cg02202484 | 0.6153247 | 0.4151899 | -130.2959 | -0.2001348 | SPRR4     |
| cg23065097 | 0.4400008 | 0.2330687 | -130.1714 | -0.2069321 | FKBP1B    |
| cg01053621 | 0.5679817 | 0.3624098 | -130.1639 | -0.2055719 | APOA2     |
| cg12992720 | 0.4648356 | 0.2566777 | -130.1187 | -0.2081579 | EDG4      |
| cg00795812 | 0.392195  | 0.1902388 | -129.543  | -0.2019562 | PDCD1     |
| cg25659818 | 0.5754424 | 0.3711866 | -129.3511 | -0.2042558 | CCL4      |
| cg17091851 | 0.5275174 | 0.3200401 | -129.3262 | -0.2074774 | LOC348174 |
| cg06226384 | 0.4042277 | 0.2011019 | -129.2648 | -0.2031258 | CACNG5    |
| cg04143809 | 0.5718522 | 0.3674147 | -129.1566 | -0.2044376 | FLJ39822  |
| cg16377880 | 0.5974121 | 0.395909  | -128.9289 | -0.2015031 | CYP4F3    |
| cg19226099 | 0.5533149 | 0.3476415 | -128.8071 | -0.2056733 | MC3R      |
| cg13705284 | 0.5130768 | 0.3056751 | -128.687  | -0.2074017 | ACOX2     |
| cg01785568 | 0.5506277 | 0.3448997 | -128.6539 | -0.205728  | MSX1      |
| cg07950803 | 0.5072255 | 0.2999371 | -128.4169 | -0.2072884 | CD1A      |
| cg24888049 | 0.4579185 | 0.2515098 | -128.2544 | -0.2064087 | FES       |
| cg19787037 | 0.5487555 | 0.3437946 | -127.5376 | -0.2049609 | SPAG11    |
| cg24840099 | 0.5609211 | 0.3569342 | -127.4014 | -0.2039869 | MSX1      |
| cg12639234 | 0.5579125 | 0.3544624 | -126.4211 | -0.2034501 | NAT2      |
| cg16219122 | 0.482095  | 0.2767116 | -126.0358 | -0.2053834 | ABCB1     |
| cg26504906 | 0.4827824 | 0.2774218 | -126.0011 | -0.2053607 | PRSS16    |
| cg14141399 | 0.5067493 | 0.3017888 | -125.4872 | -0.2049604 | HAS1      |
| cg18490846 | 0.5259629 | 0.3215033 | -125.4712 | -0.2044596 | C17orf73  |
| cg24516901 | 0.4647579 | 0.2603575 | -125.3859 | -0.2044004 | FLJ22746  |
| cg09837803 | 0.5264704 | 0.3221414 | -125.3464 | -0.204329  | IL16      |
| cg00466436 | 0.5134117 | 0.3087902 | -125.2321 | -0.2046215 | DEFB126   |
| cg13859324 | 0.500455  | 0.2958379 | -124.9985 | -0.2046171 | UNC45B    |
| cg05696092 | 0.4847794 | 0.280595  | -124.5179 | -0.2041844 | NOSIP     |
| cg19464944 | 0.5453683 | 0.34275   | -124.3512 | -0.2026183 | FCGR1A    |
| cg26705561 | 0.5424584 | 0.3396781 | -124.3477 | -0.2027803 | SEC31L2   |
| cg22805308 | 0.5238139 | 0.3207603 | -123.6418 | -0.2030536 | PLEKHG5   |
| cg18239253 | 0.559132  | 0.3585832 | -122.9183 | -0.2005488 | DEFB32    |
| cg03918304 | 0.4470581 | 0.245693  | -122.5869 | -0.2013652 | HOXD10    |
| cg14826683 | 0.5406874 | 0.339337  | -122.4321 | -0.2013504 | SPRR2D    |
| cg07947016 | 0.4818926 | 0.279759  | -122.004  | -0.2021337 | KLK2      |
| cg23571857 | 0.5467227 | 0.346406  | -121.5714 | -0.2003167 | BIRC4BP   |
| cg10210238 | 0.4546087 | 0.2538639 | -121.3372 | -0.2007448 | CDKN2B    |
| cg18085517 | 0.5434423 | 0.3433844 | -121.0168 | -0.2000579 | TRPM1     |
| cg27069753 | 0.5239905 | 0.323727  | -120.1736 | -0.2002635 | ELA3B     |
| cg14511156 | 0.4926409 | 0.2920107 | -120.025  | -0.2006302 | OSCAR     |
| cg04245402 | 0.4984854 | 0.2982791 | -119.5167 | -0.2002063 | C19orf21  |
| cg17790333 | 0.4926285 | 0.6933803 | 120.9061  | 0.2007518  | CYP11A1   |
| cg04802221 | 0.418497  | 0.6214202 | 124.1755  | 0.2029232  | LOC283849 |

|            |           |           |          |           |          |
|------------|-----------|-----------|----------|-----------|----------|
| cg24427660 | 0.5065683 | 0.7121113 | 127.7437 | 0.205543  | PNPLA2   |
| cg05253327 | 0.5510435 | 0.7536106 | 128.4231 | 0.2025671 | B3GNT1   |
| cg07251788 | 0.4873433 | 0.6970063 | 131.706  | 0.2096631 | CLTCL1   |
| cg17686260 | 0.4989893 | 0.715821  | 141.2148 | 0.2168317 | MGMT     |
| cg15926585 | 0.5148575 | 0.7312739 | 141.2148 | 0.2164164 | COMT     |
| cg05342835 | 0.3724449 | 0.585965  | 141.2148 | 0.2135201 | SYNC1    |
| cg16363586 | 0.3116095 | 0.6420277 | 349.1551 | 0.3304182 | BST2     |
| cg24101578 | 0.3397138 | 0.6606755 | 349.1551 | 0.3209617 | CDH22    |
| cg01346152 | 0.2509769 | 0.5709909 | 349.1551 | 0.3200139 | DHRS3    |
| cg14409083 | 0.2385762 | 0.5489431 | 349.1551 | 0.3103669 | EMP1     |
| cg15958424 | 0.2685107 | 0.5684447 | 349.1551 | 0.299934  | ACPP     |
| cg03852144 | 0.2662518 | 0.5514572 | 349.1551 | 0.2852054 | GLRX     |
| cg16517394 | 0.2047307 | 0.4885386 | 349.1551 | 0.2838078 | TNFSF4   |
| cg26509022 | 0.2033753 | 0.4830421 | 349.1551 | 0.2796668 | ALDH1A3  |
| cg08624249 | 0.4790302 | 0.7561793 | 349.1551 | 0.2771491 | KIAA0889 |
| cg18702197 | 0.3662047 | 0.6433522 | 349.1551 | 0.2771474 | HOXD3    |
| cg10861599 | 0.2820067 | 0.5572135 | 349.1551 | 0.2752068 | TNFSF4   |
| cg09871315 | 0.305374  | 0.5778506 | 349.1551 | 0.2724766 | HOXA2    |
| cg19224278 | 0.3148687 | 0.5863332 | 349.1551 | 0.2714646 | ALDH1A3  |
| cg06204948 | 0.226315  | 0.4946114 | 349.1551 | 0.2682964 | MARK2    |
| cg06507244 | 0.4464805 | 0.7133806 | 349.1551 | 0.2669001 | DHX32    |
| cg18172186 | 0.5204926 | 0.7851661 | 349.1551 | 0.2646735 | KIAA1913 |
| cg01103836 | 0.6749582 | 0.9357197 | 349.1551 | 0.2607614 | MYO9B    |
| cg14371590 | 0.3117769 | 0.5718333 | 349.1551 | 0.2600564 | SLC26A10 |
| cg01126560 | 0.3978014 | 0.6578573 | 349.1551 | 0.2600559 | C9orf142 |
| cg07285276 | 0.5220789 | 0.7782456 | 349.1551 | 0.2561668 | RAPGEF1  |
| cg25101936 | 0.5005782 | 0.7544968 | 349.1551 | 0.2539186 | ZBTB16   |
| cg02506908 | 0.4224889 | 0.6762525 | 349.1551 | 0.2537636 | HPD      |
| cg17105014 | 0.1782841 | 0.4286318 | 349.1551 | 0.2503477 | GYPC     |
| cg13547644 | 0.1747356 | 0.424314  | 349.1551 | 0.2495784 | ACTA1    |
| cg03605761 | 0.357101  | 0.6054595 | 349.1551 | 0.2483585 | RNF126   |
| cg17890764 | 0.4058547 | 0.6488432 | 349.1551 | 0.2429885 | ITIH4    |
| cg18392482 | 0.545368  | 0.7868214 | 349.1551 | 0.2414534 | AMDHD1   |
| cg12564453 | 0.5336493 | 0.7743607 | 349.1551 | 0.2407115 | CETP     |
| cg04106785 | 0.4860941 | 0.7256647 | 349.1551 | 0.2395707 | CDK5R1   |
| cg07236190 | 0.4856061 | 0.7251654 | 349.1551 | 0.2395594 | AMDHD1   |
| cg22628873 | 0.4528286 | 0.691975  | 349.1551 | 0.2391464 | GGT6     |
| cg02490034 | 0.3971752 | 0.6356252 | 349.1551 | 0.23845   | MEST     |
| cg13906813 | 0.3991899 | 0.6372017 | 349.1551 | 0.2380118 | HLA-DPA1 |
| cg24459563 | 0.4840423 | 0.7202178 | 349.1551 | 0.2361754 | CACNG1   |
| cg12177001 | 0.5207384 | 0.7556784 | 349.1551 | 0.2349401 | IFI27    |
| cg13351161 | 0.2395838 | 0.4730456 | 349.1551 | 0.2334618 | SCARA3   |
| cg11397854 | 0.1366182 | 0.3691158 | 349.1551 | 0.2324976 | IQSEC1   |
| cg03562120 | 0.3543206 | 0.5841243 | 349.1551 | 0.2298037 | WISP2    |
| cg03271907 | 0.5886568 | 0.8162938 | 349.1551 | 0.227637  | MGMT     |

|            |           |           |          |           |          |
|------------|-----------|-----------|----------|-----------|----------|
| cg24012708 | 0.4222224 | 0.6492432 | 349.1551 | 0.2270208 | HDHD3    |
| cg02000005 | 0.1389588 | 0.365793  | 349.1551 | 0.2268341 | CRIP1    |
| cg02674804 | 0.6295489 | 0.8560374 | 349.1551 | 0.2264885 | REEP6    |
| cg13763232 | 0.4830189 | 0.7087107 | 349.1551 | 0.2256918 | SLC6A6   |
| cg26668713 | 0.1475352 | 0.372605  | 349.1551 | 0.2250698 | SIPA1    |
| cg11554605 | 0.5178393 | 0.7423853 | 349.1551 | 0.2245461 | ASB4     |
| cg27114026 | 0.5307989 | 0.7550393 | 349.1551 | 0.2242405 | ELA1     |
| cg03096975 | 0.1735029 | 0.3939396 | 349.1551 | 0.2204366 | EML2     |
| cg24122922 | 0.4226836 | 0.6421795 | 349.1551 | 0.219496  | C20orf39 |
| cg16616769 | 0.5399963 | 0.7581047 | 349.1551 | 0.2181085 | MGC35048 |
| cg22740835 | 0.3141955 | 0.5322756 | 349.1551 | 0.2180801 | DDR2     |
| cg09595479 | 0.1804643 | 0.3960773 | 349.1551 | 0.2156131 | PRPH     |
| cg22759185 | 0.5592517 | 0.7734538 | 349.1551 | 0.2142021 | REEP6    |
| cg23418591 | 0.1130913 | 0.3204938 | 349.1551 | 0.2074025 | FLJ90166 |
| cg17791651 | 0.2977996 | 0.50512   | 349.1551 | 0.2073204 | POU3F1   |
| cg24739326 | 0.1848891 | 0.3881737 | 349.1551 | 0.2032847 | CHST8    |
| cg17339202 | 0.2780684 | 0.4805886 | 349.1551 | 0.2025203 | SYNC1    |

**Supplementary table 2 – Probes differentially methylated between cluster A and normal tissue**

| TargetID   | Cluster A.AVG_Beta | Cluster A.DiffScore | Cluster A.Delta Beta | Normal.AVG_Beta | SYMBOL   |
|------------|--------------------|---------------------|----------------------|-----------------|----------|
| cg24101578 | 0.7332597          | 352.7258            | 0.3935458            | 0.3397138       | CDH22    |
| cg14409083 | 0.6145285          | 352.7258            | 0.3759523            | 0.2385762       | EMP1     |
| cg01346152 | 0.626482           | 352.7258            | 0.3755051            | 0.2509769       | DHRS3    |
| cg16363586 | 0.6836122          | 352.7258            | 0.3720027            | 0.3116095       | BST2     |
| cg15958424 | 0.6179878          | 352.7258            | 0.349477             | 0.2685107       | ACPP     |
| cg03852144 | 0.6107026          | 352.7258            | 0.3444507            | 0.2662518       | GLRX     |
| cg18702197 | 0.6866837          | 352.7258            | 0.320479             | 0.3662047       | HOXD3    |
| cg17105014 | 0.4973903          | 352.7258            | 0.3191062            | 0.1782841       | GYPC     |
| cg10861599 | 0.5965094          | 352.7258            | 0.3145027            | 0.2820067       | TNFSF4   |
| cg16517394 | 0.5172255          | 352.7258            | 0.3124948            | 0.2047307       | TNFSF4   |
| cg09871315 | 0.6114195          | 352.7258            | 0.3060455            | 0.305374        | HOXA2    |
| cg17890764 | 0.7031412          | 352.7258            | 0.2972865            | 0.4058547       | ITIH4    |
| cg02506908 | 0.71776            | 352.7258            | 0.2952711            | 0.4224889       | HPD      |
| cg08624249 | 0.7714651          | 352.7258            | 0.2924349            | 0.4790302       | KIAA0889 |
| cg06204948 | 0.5180413          | 352.7258            | 0.2917262            | 0.226315        | MARK2    |
| cg18172186 | 0.810114           | 352.7258            | 0.2896214            | 0.5204926       | KIAA1913 |
| cg01126560 | 0.6849098          | 352.7258            | 0.2871084            | 0.3978014       | C9orf142 |
| cg04106785 | 0.7731463          | 352.7258            | 0.2870523            | 0.4860941       | CDK5R1   |
| cg01103836 | 0.9594297          | 352.7258            | 0.2844715            | 0.6749582       | MYO9B    |
| cg19224278 | 0.5934695          | 352.7258            | 0.2786008            | 0.3148687       | ALDH1A3  |
| cg12564453 | 0.8119962          | 352.7258            | 0.2783469            | 0.5336493       | CETP     |
| cg13547644 | 0.4525869          | 352.7258            | 0.2778513            | 0.1747356       | ACTA1    |



|            |           |          |           |           |              |
|------------|-----------|----------|-----------|-----------|--------------|
| cg14371590 | 0.5890544 | 352.7258 | 0.2772775 | 0.3117769 | SLC26A10     |
| cg26509022 | 0.4798759 | 352.7258 | 0.2765006 | 0.2033753 | ALDH1A3      |
| cg13763232 | 0.7564856 | 352.7258 | 0.2734667 | 0.4830189 | SLC6A6       |
| cg25101936 | 0.7733716 | 352.7258 | 0.2727934 | 0.5005782 | ZBTB16       |
| cg11397854 | 0.4062031 | 352.7258 | 0.269585  | 0.1366182 | IQSEC1       |
| cg03096975 | 0.4415262 | 352.7258 | 0.2680233 | 0.1735029 | EML2         |
| cg07285276 | 0.7890551 | 352.7258 | 0.2669762 | 0.5220789 | RAPGEF1      |
| cg06507244 | 0.7111591 | 352.7258 | 0.2646786 | 0.4464805 | DHX32        |
| cg05342835 | 0.6354279 | 352.7258 | 0.262983  | 0.3724449 | SYNC1        |
| cg24459563 | 0.7467324 | 352.7258 | 0.2626901 | 0.4840423 | CACNG1       |
| cg13351161 | 0.5008287 | 352.7258 | 0.2612449 | 0.2395838 | SCARA3       |
| cg17791651 | 0.5555752 | 352.7258 | 0.2577756 | 0.2977996 | POU3F1       |
| cg18392482 | 0.799858  | 352.7258 | 0.25449   | 0.545368  | AMDHD1       |
| cg16616769 | 0.793669  | 352.7258 | 0.2536728 | 0.5399963 | MGC3504<br>8 |
| cg03605761 | 0.6107413 | 352.7258 | 0.2536402 | 0.357101  | RNF126       |
| cg11554605 | 0.7712382 | 352.7258 | 0.253399  | 0.5178393 | ASB4         |
| cg04700814 | 0.5465503 | 352.7258 | 0.252449  | 0.2941013 | HEXIM1       |
| cg07236190 | 0.7362686 | 352.7258 | 0.2506626 | 0.4856061 | AMDHD1       |
| cg24739326 | 0.4351847 | 352.7258 | 0.2502957 | 0.1848891 | CHST8        |
| cg02490034 | 0.6436431 | 352.7258 | 0.2464679 | 0.3971752 | MEST         |
| cg02674804 | 0.875141  | 352.7258 | 0.2455921 | 0.6295489 | REEP6        |
| cg03562120 | 0.5988758 | 352.7258 | 0.2445552 | 0.3543206 | WISP2        |
| cg00431549 | 0.5772381 | 352.7258 | 0.2437458 | 0.3334922 | MGP          |
| cg24012708 | 0.6654038 | 352.7258 | 0.2431815 | 0.4222224 | HDHD3        |
| cg05485060 | 0.6547932 | 352.7258 | 0.2428985 | 0.4118947 | CTNNA1       |
| cg12177001 | 0.7634715 | 352.7258 | 0.2427331 | 0.5207384 | IFI27        |
| cg17339202 | 0.5202612 | 352.7258 | 0.2421929 | 0.2780684 | SYNC1        |
| cg08831348 | 0.5175472 | 352.7258 | 0.2405247 | 0.2770225 | EML2         |
| cg22740835 | 0.5542331 | 352.7258 | 0.2400376 | 0.3141955 | DDR2         |
| cg09595479 | 0.4201087 | 352.7258 | 0.2396445 | 0.1804643 | PRPH         |
| cg15926585 | 0.7544509 | 352.7258 | 0.2395933 | 0.5148575 | COMT         |
| cg24427660 | 0.7459579 | 352.7258 | 0.2393897 | 0.5065683 | PNPLA2       |
| cg24122922 | 0.661855  | 352.7258 | 0.2391714 | 0.4226836 | C20orf39     |
| cg22628873 | 0.6912075 | 352.7258 | 0.2383789 | 0.4528286 | GGT6         |
| cg26668713 | 0.3849941 | 352.7258 | 0.2374589 | 0.1475352 | SIPA1        |
| cg13906813 | 0.6349856 | 352.7258 | 0.2357956 | 0.3991899 | HLA-DPA1     |
| cg04640913 | 0.6280844 | 352.7258 | 0.2332859 | 0.3947985 | CDH22        |
| cg27114026 | 0.7597534 | 352.7258 | 0.2289546 | 0.5307989 | ELA1         |
| cg03271907 | 0.8175515 | 352.7258 | 0.2288947 | 0.5886568 | MGMT         |
| cg02000005 | 0.3650815 | 352.7258 | 0.2261227 | 0.1389588 | CRIP1        |
| cg22759185 | 0.7847828 | 352.7258 | 0.2255311 | 0.5592517 | REEP6        |
| cg24315815 | 0.7485856 | 352.7258 | 0.2243492 | 0.5242364 | PLSCR4       |
| cg24134767 | 0.6538556 | 352.7258 | 0.2232977 | 0.4305578 | HTR3A        |
| cg12232463 | 0.6534845 | 352.7258 | 0.2229266 | 0.4305579 | LONRF2       |

|            |           |           |            |           |               |
|------------|-----------|-----------|------------|-----------|---------------|
| cg06627364 | 0.4051811 | 352.7258  | 0.2221046  | 0.1830765 | MGC4677       |
| cg17518962 | 0.4466075 | 352.7258  | 0.2217132  | 0.2248944 | GAL3ST4       |
| cg23418591 | 0.3278128 | 352.7258  | 0.2147214  | 0.1130913 | FLJ90166      |
| cg22601917 | 0.4682869 | 352.7258  | 0.2139677  | 0.2543193 | H6PD          |
| cg26511075 | 0.8041921 | 352.7258  | 0.2107728  | 0.5934194 | FLJ25422      |
| cg03752628 | 0.4513408 | 352.7258  | 0.2099021  | 0.2414387 | PTGFRN        |
| cg27301343 | 0.3521307 | 352.7258  | 0.206864   | 0.1452667 | EML2          |
| cg23547429 | 0.4433117 | 352.7258  | 0.2063925  | 0.2369192 | SLC43A3       |
| cg15940569 | 0.4653472 | 352.7258  | 0.2003441  | 0.2650031 | GABRB3        |
| cg17998964 | 0.3640886 | 352.7258  | 0.2002974  | 0.1637913 | MARK2         |
| cg26394940 | 0.3185764 | 352.7258  | 0.2002554  | 0.118321  | FLJ10945      |
| cg17686260 | 0.7179564 | 144.0333  | 0.2189671  | 0.4989893 | MGMT          |
| cg20748065 | 0.8217276 | 144.0333  | 0.2027962  | 0.6189314 | POR           |
| cg13185308 | 0.6091214 | 141.1364  | 0.216127   | 0.3929945 | ABCC8         |
| cg05253327 | 0.7634494 | 141.1364  | 0.212406   | 0.5510435 | B3GNT1        |
| cg07251788 | 0.6994576 | 134.0077  | 0.2121144  | 0.4873433 | CLTCL1        |
| cg21685427 | 0.7496092 | 127.6712  | 0.2026033  | 0.5470058 | SGK2          |
| cg12866859 | 0.564211  | 126.7013  | 0.2018786  | 0.3623323 | HEXIM1        |
| cg04802221 | 0.6242384 | 126.1966  | 0.2057414  | 0.418497  | LOC28384<br>9 |
| cg16077929 | 0.7059836 | 122.454   | 0.202078   | 0.5039055 | CDKL1         |
| cg04902405 | 0.6831874 | 120.2602  | 0.2012576  | 0.4819297 | ZC3H11A       |
| cg20322977 | 0.305178  | -118.4144 | -0.2001438 | 0.5053217 | CYP26C1       |
| cg23855121 | 0.2799986 | -119.1795 | -0.2005431 | 0.4805417 | TLR10         |
| cg09712066 | 0.3317988 | -119.6763 | -0.2006135 | 0.5324123 | PART1         |
| cg00690280 | 0.3057972 | -119.8623 | -0.2013216 | 0.5071188 | WFDC10B       |
| cg18994063 | 0.3437956 | -119.9316 | -0.2003259 | 0.5441215 | TIMD4         |
| cg06190732 | 0.3028412 | -120.0363 | -0.2014804 | 0.5043216 | SERPINA3      |
| cg01899253 | 0.2514867 | -120.1436 | -0.200185  | 0.4516717 | FLT1          |
| cg15518950 | 0.2711562 | -120.2079 | -0.2011585 | 0.4723147 | PRP2          |
| cg24546463 | 0.2616771 | -120.3635 | -0.2009171 | 0.4625942 | MGC3971<br>5  |
| cg04780454 | 0.3553798 | -120.4698 | -0.2001289 | 0.5555087 | SERPINF2      |
| cg09551916 | 0.3277289 | -120.9396 | -0.2017671 | 0.529496  | CFHR2         |
| cg01193293 | 0.3164706 | -121.0064 | -0.2021138 | 0.5185844 | SIGLEC7       |
| cg19242268 | 0.3404177 | -121.0124 | -0.2013383 | 0.541756  | TCEA2         |
| cg09748960 | 0.2931482 | -121.122  | -0.20237   | 0.4955182 | BTNL2         |
| cg19618706 | 0.2499615 | -121.9452 | -0.2016473 | 0.4516088 | BGN           |
| cg06821120 | 0.2980053 | -122.198  | -0.2032683 | 0.5012736 | RASSF1        |
| cg11291009 | 0.225016  | -123.5925 | -0.2011363 | 0.4261523 | ARHGEF9       |
| cg07905963 | 0.2427093 | -123.7094 | -0.2026787 | 0.445388  | CYP2A13       |
| cg10078829 | 0.2649967 | -123.9057 | -0.2040406 | 0.4690373 | KLK4          |
| cg17589341 | 0.2931259 | -124.1937 | -0.2048698 | 0.4979957 | SLC14A1       |
| cg03641225 | 0.230982  | -124.4566 | -0.2024149 | 0.4333968 | DIRAS3        |
| cg08390254 | 0.278048  | -124.7521 | -0.2051388 | 0.4831868 | ATP1A2        |

|            |           |           |            |           |               |
|------------|-----------|-----------|------------|-----------|---------------|
| cg04991214 | 0.3881027 | -124.811  | -0.2008432 | 0.5889459 | PFDN2         |
| cg09573795 | 0.3831814 | -125.2384 | -0.2016078 | 0.5847892 | MSX1          |
| cg01375871 | 0.2882161 | -125.8227 | -0.2061679 | 0.4943841 | TPSD1         |
| cg09229960 | 0.381303  | -126.0885 | -0.2023905 | 0.5836935 | EMD           |
| cg15585987 | 0.2554448 | -126.4039 | -0.2057061 | 0.461151  | SNTG1         |
| cg21274025 | 0.2914673 | -126.4936 | -0.2067241 | 0.4981915 | PLA2G3        |
| cg02964385 | 0.2918202 | -126.7198 | -0.2069061 | 0.4987263 | STK38         |
| cg13530946 | 0.3950854 | -126.7866 | -0.2015653 | 0.5966507 | IARS2         |
| cg16567044 | 0.3598641 | -126.8894 | -0.2046869 | 0.564551  | MEG3          |
| cg22960952 | 0.2821444 | -126.9434 | -0.2070005 | 0.4891449 | FLJ23657      |
| cg02847500 | 0.2053086 | -127.24   | -0.2021651 | 0.4074737 | SOX3          |
| cg17034109 | 0.2978995 | -127.4115 | -0.2074535 | 0.505353  | CYB561D1      |
| cg05379350 | 0.1999034 | -128.0079 | -0.2021398 | 0.4020432 | GIT1          |
| cg05078019 | 0.3292986 | -128.6128 | -0.2076704 | 0.536969  | PDE6B         |
| cg13088755 | 0.3718534 | -128.6896 | -0.2050821 | 0.5769354 | P2RY10        |
| cg24625388 | 0.3042749 | -128.7373 | -0.2084416 | 0.5127165 | NEBL          |
| cg11885098 | 0.1913416 | -128.9562 | -0.2017857 | 0.3931274 | EFNA2         |
| cg01138020 | 0.3516943 | -128.974  | -0.2067776 | 0.5584719 | MGC2967<br>1  |
| cg15095327 | 0.3596787 | -129.0713 | -0.2063104 | 0.5659891 | IL17RE        |
| cg12493906 | 0.3520238 | -129.4122 | -0.2070758 | 0.5590996 | MMP26         |
| cg12188416 | 0.2908005 | -129.4216 | -0.2090559 | 0.4998563 | TP73L         |
| cg15952487 | 0.282603  | -129.5231 | -0.2090795 | 0.4916825 | CD1B          |
| cg16899036 | 0.4121099 | -129.6008 | -0.2016239 | 0.6137337 | HOMER3        |
| cg20822579 | 0.2196767 | -129.6012 | -0.205779  | 0.4254557 | RIPK3         |
| cg25427638 | 0.4107473 | -129.7497 | -0.2018911 | 0.6126384 | CYP2A7        |
| cg08695223 | 0.3229546 | -129.7582 | -0.2087946 | 0.5317491 | SLC9A6        |
| cg24516901 | 0.2558637 | -130.2406 | -0.2088943 | 0.4647579 | FLJ22746      |
| cg25391023 | 0.3174582 | -130.2804 | -0.2093625 | 0.5268207 | BTNL2         |
| cg22927134 | 0.3313952 | -130.3938 | -0.2089404 | 0.5403357 | CHRM5         |
| cg13370916 | 0.2228892 | -130.5849 | -0.206916  | 0.4298052 | STARD8        |
| cg06494770 | 0.334155  | -130.6557 | -0.2090115 | 0.5431665 | KLHL13        |
| cg22396129 | 0.2738834 | -130.6557 | -0.2098444 | 0.4837278 | ZCRB1         |
| cg05341878 | 0.3312151 | -130.8823 | -0.2093156 | 0.5405307 | RIMS2         |
| cg18946226 | 0.2123801 | -131.0083 | -0.2062153 | 0.4185955 | MYR8          |
| cg19937039 | 0.2143259 | -131.0266 | -0.2064409 | 0.4207667 | SERPINA1<br>0 |
| cg09871043 | 0.2681919 | -131.0416 | -0.2100105 | 0.4782025 | PKHD1         |
| cg15778232 | 0.317656  | -131.0884 | -0.20998   | 0.5276359 | PHB2          |
| cg21132577 | 0.2030788 | -131.1667 | -0.2052771 | 0.4083559 | MYOM2         |
| cg08831522 | 0.4055932 | -131.2883 | -0.2035489 | 0.6091421 | ATP10A        |
| cg03112433 | 0.2472252 | -131.325  | -0.2093503 | 0.4565755 | PFTK1         |
| cg26128441 | 0.3620113 | -131.3663 | -0.2078136 | 0.5698249 | P2RX3         |
| cg20070090 | 0.2993773 | -131.6576 | -0.2107921 | 0.5101693 | S100A8        |
| cg06785429 | 0.2677357 | -131.7551 | -0.210578  | 0.4783137 | DCUN1D1       |

|            |           |           |            |           |               |
|------------|-----------|-----------|------------|-----------|---------------|
| cg10479672 | 0.2233045 | -131.905  | -0.2080699 | 0.4313744 | IL1F8         |
| cg24252809 | 0.3921725 | -132.2431 | -0.2056834 | 0.5978559 | MRGPRX1       |
| cg22025233 | 0.4331007 | -132.318  | -0.2007014 | 0.6338021 | CYP2W1        |
| cg10329418 | 0.2559967 | -132.5723 | -0.2107975 | 0.4667942 | PON3          |
| cg27244482 | 0.3012956 | -132.5942 | -0.2114826 | 0.5127783 | CAMK2A        |
| cg17412560 | 0.275489  | -132.6036 | -0.2114277 | 0.4869167 | CSEN          |
| cg22534509 | 0.2509681 | -132.8587 | -0.2107947 | 0.4617628 | GPR81         |
| cg17141902 | 0.4249209 | -132.9019 | -0.2022038 | 0.6271248 | NINJ1         |
| cg23110514 | 0.2455575 | -133.1624 | -0.210747  | 0.4563045 | LCE3E         |
| cg12089698 | 0.3090793 | -133.5026 | -0.2120383 | 0.5211176 | SPATC1        |
| cg02149446 | 0.181548  | -133.72   | -0.2044099 | 0.3859579 | C5AR1         |
| cg24765079 | 0.2340671 | -133.8411 | -0.2105478 | 0.4446149 | CDH1          |
| cg05248470 | 0.2730139 | -133.8799 | -0.212388  | 0.4854019 | LILRB2        |
| cg14003512 | 0.3142816 | -134.054  | -0.212326  | 0.5266076 | PLGLB2        |
| cg24870391 | 0.2836571 | -134.0543 | -0.2126748 | 0.4963319 | CCL11         |
| cg23152755 | 0.3484918 | -134.0714 | -0.2107196 | 0.5592114 | DEFB105A      |
| cg24054653 | 0.1739829 | -134.3727 | -0.2037273 | 0.3777102 | C1GALT1C<br>1 |
| cg04037732 | 0.2119074 | -134.4534 | -0.2090723 | 0.4209796 | NLGN3         |
| cg00689340 | 0.3576903 | -134.5314 | -0.2104098 | 0.5681001 | RTKN          |
| cg25771201 | 0.3807566 | -134.6053 | -0.2084787 | 0.5892353 | SCDR10        |
| cg07434382 | 0.4189802 | -134.614  | -0.2041244 | 0.6231046 | LOC34817<br>4 |
| cg02797569 | 0.3661812 | -135.0655 | -0.2101178 | 0.5762991 | PCOLCE        |
| cg26531804 | 0.2638909 | -135.4019 | -0.2133679 | 0.4772589 | SPINT1        |
| cg11873854 | 0.1882231 | -135.5486 | -0.2070014 | 0.3952245 | LCN6          |
| cg01346718 | 0.1908237 | -135.7369 | -0.2075422 | 0.3983659 | CSNK1E        |
| cg06469542 | 0.4203733 | -135.7935 | -0.2047104 | 0.6250837 | THSD3         |
| cg03294491 | 0.2164522 | -135.8837 | -0.2107423 | 0.4271945 | SMAD2         |
| cg05019001 | 0.2472808 | -135.9794 | -0.2131457 | 0.4604265 | AR            |
| cg11765205 | 0.1818747 | -136.126  | -0.2065444 | 0.3884191 | ARL11         |
| cg15869022 | 0.3471672 | -136.126  | -0.2123    | 0.5594673 | GPR17         |
| cg20017147 | 0.2959923 | -136.1786 | -0.2143196 | 0.5103118 | TEX101        |
| cg20189937 | 0.278811  | -136.5787 | -0.2146159 | 0.4934269 | L2HGDH        |
| cg14117297 | 0.3105381 | -136.9484 | -0.2146208 | 0.5251589 | MGC2324<br>4  |
| cg20104776 | 0.3539625 | -137.149  | -0.2125531 | 0.5665156 | LDOC1         |
| cg11630242 | 0.1496658 | -137.3244 | -0.2015264 | 0.3511922 | AKAP10        |
| cg08711674 | 0.2864629 | -137.4816 | -0.2153485 | 0.5018114 | AKT1S1        |
| cg13283751 | 0.145064  | -137.5771 | -0.2007078 | 0.3457718 | GPX5          |
| cg26644395 | 0.2473038 | -137.9517 | -0.2147191 | 0.4620229 | UCN3          |
| cg11959435 | 0.4498086 | -138.0517 | -0.2018388 | 0.6516473 | IFNA1         |
| cg03918304 | 0.2330286 | -138.1843 | -0.2140296 | 0.4470581 | HOXD10        |
| cg11787522 | 0.3221724 | -138.2974 | -0.2152137 | 0.5373861 | STRA6         |
| cg03014957 | 0.3529748 | -138.6226 | -0.2136601 | 0.5666349 | DEFB118       |

|            |           |           |            |           |          |
|------------|-----------|-----------|------------|-----------|----------|
| cg14345281 | 0.1653643 | -138.6542 | -0.2058529 | 0.3712171 | NHS      |
| cg02554564 | 0.4470816 | -138.8802 | -0.2027748 | 0.6498564 | NTF3     |
| cg12878228 | 0.3427253 | -138.8854 | -0.2145511 | 0.5572764 | PRSS1    |
| cg16008138 | 0.2450157 | -139.1944 | -0.2155798 | 0.4605955 | RNF190   |
| cg13030582 | 0.1650685 | -139.6483 | -0.2066343 | 0.3717028 | MFAP4    |
| cg22986999 | 0.1567595 | -139.6994 | -0.2050559 | 0.3618154 | MRGPRF   |
| cg10919204 | 0.2066081 | -139.9559 | -0.213046  | 0.4196541 | CDH6     |
| cg25082710 | 0.2297456 | -140.0118 | -0.2152484 | 0.4449939 | IVL      |
| cg00443307 | 0.373426  | -140.0306 | -0.212898  | 0.586324  | KLRG1    |
| cg14076161 | 0.3039969 | -140.3604 | -0.2173117 | 0.5213086 | PRB4     |
| cg06132342 | 0.3706629 | -140.4285 | -0.2134314 | 0.5840943 | KRTHB5   |
| cg00400028 | 0.1650919 | -140.6146 | -0.2074653 | 0.3725572 | ACPL2    |
| cg11472424 | 0.46507   | -140.6441 | -0.200864  | 0.6659341 | PFKFB1   |
| cg04201347 | 0.3134785 | -140.7607 | -0.2173402 | 0.5308187 | PRRG2    |
| cg12530021 | 0.1670439 | -140.8469 | -0.2080245 | 0.3750684 | SIGLEC12 |
| cg02989940 | 0.3596947 | -140.8469 | -0.2146835 | 0.5743782 | ERAF     |
| cg13703437 | 0.4243395 | -140.8877 | -0.2074287 | 0.6317682 | FYB      |
| cg18414950 | 0.2376453 | -140.9846 | -0.2165813 | 0.4542266 | PDK3     |
| cg20312687 | 0.4111603 | -141.2237 | -0.2094319 | 0.6205922 | DEFB118  |
| cg17706173 | 0.2226909 | -141.2915 | -0.2157291 | 0.43842   | C16orf30 |
| cg17051440 | 0.4563577 | -141.5576 | -0.2028964 | 0.6592541 | CLDN2    |
| cg09584711 | 0.2366992 | -141.5733 | -0.2169933 | 0.4536925 | HPR      |
| cg21846488 | 0.1930393 | -141.7934 | -0.2129134 | 0.4059526 | LCE4A    |
| cg03886110 | 0.4701139 | -141.8275 | -0.20068   | 0.6707939 | PECAM1   |
| cg03960217 | 0.1693143 | -142.0158 | -0.2094267 | 0.3787409 | LCE2C    |
| cg01868128 | 0.4053701 | -142.7082 | -0.2111286 | 0.6164987 | LCE5A    |
| cg21283680 | 0.4450153 | -142.7692 | -0.2054803 | 0.6504956 | SH3BP5   |
| cg25697314 | 0.4050295 | -142.8032 | -0.2112346 | 0.6162641 | IL26     |
| cg09258965 | 0.4485958 | -142.8194 | -0.2049373 | 0.6535331 | TBC1D7   |
| cg26757722 | 0.2471447 | -143.1702 | -0.2188267 | 0.4659714 | CACNG2   |
| cg07022477 | 0.3212568 | -143.1928 | -0.2188037 | 0.5400606 | HIF3A    |
| cg18098286 | 0.4164928 | -143.2794 | -0.2100291 | 0.6265219 | UGT1A10  |
| cg03330516 | 0.4116905 | -143.3961 | -0.2107508 | 0.6224413 | SRMS     |
| cg10379687 | 0.2115823 | -143.6322 | -0.2165875 | 0.4281698 | SPINLW1  |
| cg11653864 | 0.2514844 | -143.9112 | -0.2195982 | 0.4710826 | ELK1     |
| cg11721194 | 0.358223  | -144.1003 | -0.2170462 | 0.5752692 | SLAMF7   |
| cg10345936 | 0.4589359 | -144.1806 | -0.2040199 | 0.6629558 | SLC36A2  |
| cg02164442 | 0.3741359 | -144.1914 | -0.2156478 | 0.5897837 | ITGAD    |
| cg10710439 | 0.2263446 | -144.1914 | -0.2183523 | 0.4446968 | FLJ37549 |
| cg26692016 | 0.4414303 | -144.2926 | -0.2069836 | 0.6484139 | APOBEC1  |
| cg12391921 | 0.4017639 | -144.3346 | -0.2126414 | 0.6144053 | ITGB1BP2 |
| cg13311440 | 0.2941735 | -144.5328 | -0.2206053 | 0.5147789 | CD48     |
| cg03599338 | 0.3792056 | -145.1558 | -0.2157747 | 0.5949804 | SUSD2    |
| cg17040807 | 0.16549   | -145.1856 | -0.2114108 | 0.3769008 | CYGB     |
| cg12435792 | 0.2837303 | -145.3017 | -0.2212702 | 0.5050005 | PDE6B    |

|            |           |           |            |           |               |
|------------|-----------|-----------|------------|-----------|---------------|
| cg27413508 | 0.228167  | -145.3263 | -0.2193979 | 0.447565  | COX4I2        |
| cg14724265 | 0.3385094 | -145.4979 | -0.2194948 | 0.5580043 | PPEF2         |
| cg00687674 | 0.2523653 | -145.6092 | -0.2209581 | 0.4733233 | TMEM84        |
| cg13396068 | 0.4492672 | -145.662  | -0.2065355 | 0.6558028 | DCD           |
| cg10818781 | 0.4087511 | -145.6989 | -0.2126103 | 0.6213614 | PHB2          |
| cg20790540 | 0.4506408 | -146.1804 | -0.2066086 | 0.6572493 | PTCRA         |
| cg25839227 | 0.3954162 | -146.2385 | -0.2146399 | 0.610056  | ABI3          |
| cg16536450 | 0.1970449 | -146.3997 | -0.2172039 | 0.4142489 | UNQ2541       |
| cg22879289 | 0.3132991 | -146.4757 | -0.2214967 | 0.5347958 | NID1          |
| cg15792367 | 0.2997589 | -146.4855 | -0.2219304 | 0.5216893 | KLK11         |
| cg02595219 | 0.2420373 | -146.5807 | -0.2212449 | 0.4632823 | KCNE3         |
| cg11328541 | 0.196887  | -146.7819 | -0.2175023 | 0.4143894 | OR7C1         |
| cg23216015 | 0.1672887 | -146.971  | -0.2132244 | 0.3805131 | C7orf16       |
| cg05982504 | 0.4795794 | -147.4093 | -0.2021373 | 0.6817167 | IGFALS        |
| cg23571857 | 0.3250641 | -147.4612 | -0.2216586 | 0.5467227 | BIRC4BP       |
| cg04515986 | 0.2463548 | -147.5236 | -0.2221797 | 0.4685345 | FTHL17        |
| cg16514843 | 0.381165  | -147.5513 | -0.2171338 | 0.5982988 | PAX4          |
| cg25650811 | 0.46213   | -147.6704 | -0.2054992 | 0.6676292 | LOC22307<br>5 |
| cg12354377 | 0.3049158 | -147.6877 | -0.2226599 | 0.5275756 | ANK3          |
| cg02988947 | 0.3266466 | -147.7999 | -0.2218112 | 0.5484578 | LIMD2         |
| cg18356799 | 0.3019392 | -147.8987 | -0.2228991 | 0.5248383 | DSC1          |
| cg27329371 | 0.3304183 | -147.9071 | -0.2216765 | 0.5520948 | ALDH3A1       |
| cg18806980 | 0.4388489 | -147.9369 | -0.2095889 | 0.6484378 | KIAA0703      |
| cg22202141 | 0.3842517 | -147.9807 | -0.2170756 | 0.6013273 | FCGR3A        |
| cg22549408 | 0.2736993 | -148.7233 | -0.2237812 | 0.4974805 | PMAIP1        |
| cg26745032 | 0.2319348 | -148.7697 | -0.2223457 | 0.4542806 | REPS2         |
| cg12616487 | 0.4818087 | -148.8613 | -0.2025152 | 0.684324  | EML3          |
| cg12397274 | 0.246868  | -149.0077 | -0.2233362 | 0.4702042 | TINAG         |
| cg16601385 | 0.4114724 | -149.1962 | -0.2144194 | 0.6258917 | CFD           |
| cg21529807 | 0.1239057 | -149.3882 | -0.2055418 | 0.3294475 | CEACAM4       |
| cg08834018 | 0.2937329 | -149.6384 | -0.2243297 | 0.5180627 | PRODH         |
| cg05973262 | 0.2888535 | -149.6653 | -0.2244275 | 0.513281  | NOTCH4        |
| cg20437604 | 0.4813178 | -149.9854 | -0.2032314 | 0.6845492 | ANXA9         |
| cg04739485 | 0.4025286 | -150.0947 | -0.2161793 | 0.618708  | MLXIP         |
| cg23324787 | 0.4008134 | -150.0947 | -0.2164026 | 0.617216  | RAG2          |
| cg18303397 | 0.2397192 | -150.2395 | -0.2239334 | 0.4636526 | MBD4          |
| cg02966851 | 0.2625979 | -150.5136 | -0.2249602 | 0.4875581 | C6orf149      |
| cg16219122 | 0.2572388 | -150.5426 | -0.2248562 | 0.482095  | ABCB1         |
| cg10478221 | 0.2903058 | -150.5465 | -0.2250453 | 0.5153511 | WFIKKN1       |
| cg17405586 | 0.4263836 | -150.9531 | -0.213324  | 0.6397075 | KRT1          |
| cg23075286 | 0.4092997 | -151.0334 | -0.2158496 | 0.6251493 | GALP          |
| cg10432859 | 0.4270325 | -151.1385 | -0.2133386 | 0.6403711 | UGT1A7        |
| cg22909609 | 0.2763251 | -151.3004 | -0.2256913 | 0.5020164 | ITGBL1        |
| cg00673191 | 0.2233127 | -151.3388 | -0.2237286 | 0.4470413 | DOPEY2        |

|            |           |           |            |           |               |
|------------|-----------|-----------|------------|-----------|---------------|
| cg24304714 | 0.2145681 | -151.3756 | -0.2230319 | 0.4376    | LCE1C         |
| cg01693350 | 0.2668423 | -151.4644 | -0.2257425 | 0.4925848 | WT1           |
| cg02436686 | 0.2404351 | -151.5272 | -0.2249544 | 0.4653894 | GMFG          |
| cg06323290 | 0.4013438 | -151.6876 | -0.217326  | 0.6186698 | HK1           |
| cg05492113 | 0.4573896 | -151.7381 | -0.2086656 | 0.6660552 | TUB           |
| cg04057858 | 0.3856391 | -151.8873 | -0.2194065 | 0.6050456 | UNQ9391       |
| cg26777475 | 0.3773532 | -152.1175 | -0.2204934 | 0.5978466 | PCOLCE        |
| cg22772878 | 0.2362997 | -152.1621 | -0.2252199 | 0.4615197 | DIRAS1        |
| cg14178895 | 0.2285026 | -152.2419 | -0.2248005 | 0.4533031 | C6orf105      |
| cg19006008 | 0.4221993 | -152.6947 | -0.2149934 | 0.6371928 | F2RL3         |
| cg14186992 | 0.4473409 | -152.9292 | -0.2110871 | 0.6584281 | HKR3          |
| cg01762581 | 0.204545  | -152.9583 | -0.2232794 | 0.4278245 | DKK4          |
| cg19258973 | 0.3955472 | -153.6843 | -0.2192921 | 0.6148393 | KRTHB3        |
| cg11656547 | 0.1086341 | -153.7138 | -0.2047213 | 0.3133553 | MAMDC2        |
| cg09076584 | 0.4620097 | -153.7842 | -0.2089669 | 0.6709765 | FLJ25006      |
| cg12682367 | 0.3934429 | -153.8131 | -0.2196435 | 0.6130863 | FLJ46358      |
| cg21624359 | 0.2508735 | -153.8843 | -0.2271428 | 0.4780163 | FFAR3         |
| cg02579133 | 0.4642254 | -154.1701 | -0.2087704 | 0.6729958 | KRTAP10-8     |
| cg24147596 | 0.4405248 | -154.5361 | -0.2131495 | 0.6536743 | ARL14         |
| cg26222045 | 0.3680768 | -154.9147 | -0.2232403 | 0.5913171 | UNQ5810       |
| cg01353448 | 0.158517  | -154.9217 | -0.2180867 | 0.3766038 | C7orf16       |
| cg18766847 | 0.4180777 | -154.9822 | -0.2169532 | 0.6350309 | ACMSD         |
| cg22937804 | 0.3106337 | -155.2697 | -0.2277431 | 0.5383769 | MGC4450<br>5  |
| cg11811840 | 0.4031739 | -155.3922 | -0.2193204 | 0.6224942 | UGT1A1        |
| cg04365980 | 0.4123907 | -155.4745 | -0.2180764 | 0.6304671 | CLEC3A        |
| cg19554294 | 0.3922128 | -155.5953 | -0.2208846 | 0.6130974 | VN1R2         |
| cg09001777 | 0.4307757 | -155.621  | -0.2153644 | 0.6461401 | FUT3          |
| cg10848367 | 0.440317  | -155.7612 | -0.2138831 | 0.6542001 | SCGB1D2       |
| cg15916061 | 0.3222231 | -155.7636 | -0.2275024 | 0.5497255 | SLC17A4       |
| cg01185080 | 0.3223415 | -155.8091 | -0.2275274 | 0.5498688 | ZNF710        |
| cg07197059 | 0.1707434 | -156.0413 | -0.2211574 | 0.3919009 | EFS           |
| cg24309555 | 0.407032  | -156.2309 | -0.2192938 | 0.6263258 | APOB          |
| cg15484375 | 0.5091329 | -156.6051 | -0.2009427 | 0.7100756 | SAA1          |
| cg25645748 | 0.4271277 | -157.0951 | -0.2167916 | 0.6439193 | AKAP14        |
| cg06980053 | 0.2599823 | -157.3777 | -0.2299094 | 0.4898917 | RASSF1        |
| cg14324675 | 0.3868751 | -157.5825 | -0.2227609 | 0.609636  | LST1          |
| cg26185508 | 0.4705416 | -157.7764 | -0.2095241 | 0.6800656 | CDCP2         |
| cg04833845 | 0.3969057 | -157.8961 | -0.2216625 | 0.6185682 | KCNN4         |
| cg15746187 | 0.4348632 | -158.5422 | -0.2163526 | 0.6512157 | FBXO44        |
| cg24340657 | 0.4289711 | -158.7118 | -0.2174114 | 0.6463825 | KRT24         |
| cg02046017 | 0.2394491 | -159.051  | -0.2304628 | 0.469912  | LOC22007<br>0 |
| cg21808053 | 0.2943644 | -159.5813 | -0.2312542 | 0.5256186 | DIRAS3        |
| cg27168844 | 0.4139656 | -159.7097 | -0.220312  | 0.6342776 | IL17          |

|            |            |           |            |           |          |
|------------|------------|-----------|------------|-----------|----------|
| cg22445920 | 0.4291323  | -159.8096 | -0.2180046 | 0.647137  | SLC36A3  |
| cg17191715 | 0.4532608  | -159.8428 | -0.2138712 | 0.667132  | CA1      |
| cg12019109 | 0.3623379  | -159.8586 | -0.2269299 | 0.5892678 | AZGP1    |
| cg02656594 | 0.1788845  | -159.8925 | -0.225427  | 0.4043115 | IL21R    |
| cg04189838 | 0.5201645  | -160.0506 | -0.2001466 | 0.7203111 | CYP2C19  |
| cg02633817 | 0.4756064  | -160.2205 | -0.2098199 | 0.6854264 | FXVD3    |
| cg06885782 | 0.2561986  | -160.4227 | -0.2320093 | 0.4882079 | KCNQ4    |
| cg15669228 | 0.3592457  | -160.4373 | -0.227605  | 0.5868507 | IFNA8    |
| cg20516209 | 0.4120677  | -160.508  | -0.2210638 | 0.6331316 | EMILIN1  |
| cg04740359 | 0.2572383  | -160.5453 | -0.2321214 | 0.4893597 | NTF3     |
| cg12937434 | 0.1239207  | -160.6077 | -0.2148091 | 0.3387298 | BZRAP1   |
| cg07745725 | 0.4106768  | -160.7582 | -0.2214178 | 0.6320946 | PSG3     |
| cg00134787 | 0.3632242  | -160.9906 | -0.2275463 | 0.5907705 | MYH1     |
| cg19998328 | 0.3342838  | -161.0465 | -0.2301728 | 0.5644566 | LOC90580 |
| cg23282949 | 0.4382015  | -161.5398 | -0.2174641 | 0.6556656 | RENBP    |
| cg16713808 | 0.4343469  | -161.7284 | -0.2182237 | 0.6525706 | CRNN     |
| cg16791508 | 0.5221641  | -161.9435 | -0.2005942 | 0.7227583 | KRTHB3   |
| cg14898892 | 0.3075231  | -161.9442 | -0.2323716 | 0.5398947 | SHRM     |
| cg24552358 | 0.4808476  | -162.1369 | -0.2097592 | 0.6906068 | ORM1     |
| cg01479232 | 0.3674792  | -162.1369 | -0.2278015 | 0.5952808 | C20orf54 |
| cg26917999 | 0.4056487  | -162.1874 | -0.2229825 | 0.6286312 | LZTS1    |
| cg21754343 | 0.3664255  | -162.226  | -0.2279745 | 0.5944    | LCE2B    |
| cg23029519 | 0.4901026  | -162.5256 | -0.2080323 | 0.6981349 | IFNA4    |
| cg09626634 | 0.3063965  | -162.5256 | -0.2328155 | 0.539212  | EBI2     |
| cg16463460 | 0.2481602  | -162.5452 | -0.233334  | 0.4814942 | WT1      |
| cg24654350 | 0.5075833  | -162.6712 | -0.2042977 | 0.711881  | KIR3DL1  |
| cg20795863 | 0.4858132  | -162.678  | -0.2090192 | 0.6948323 | NEU2     |
| cg03386373 | 0.3384578  | -162.7298 | -0.2309425 | 0.5694003 | SPATA3   |
| cg15329483 | 0.3690506  | -162.7867 | -0.2280393 | 0.5970898 | SSX7     |
| cg22563697 | 0.5068834  | -162.8045 | -0.2045243 | 0.7114077 | PPP1R16A |
| cg04713352 | 0.3458334  | -162.8282 | -0.2303871 | 0.5762205 | ATP4A    |
| cg21109025 | 0.5168666  | -163.0001 | -0.2023481 | 0.7192147 | CCL2     |
| cg27655855 | 0.4963335  | -163.2626 | -0.2070765 | 0.70341   | CST9L    |
| cg01031251 | 0.3859918  | -163.2712 | -0.2263087 | 0.6123005 | RPS6KA1  |
| cg16175792 | 0.3128198  | -163.3323 | -0.2330513 | 0.5458711 | HSD3B1   |
| cg22607339 | 0.5102783  | -163.4568 | -0.2040805 | 0.7143588 | MPL      |
| cg21148892 | 0.499262   | -163.6696 | -0.206645  | 0.705907  | CLEC4F   |
| cg07979357 | 0.08702693 | -163.6714 | -0.2056606 | 0.2926875 | IL27RA   |
| cg22340747 | 0.478885   | -163.7891 | -0.2110323 | 0.6899173 | GATM     |
| cg11271605 | 0.0798566  | -163.8154 | -0.2030405 | 0.2828971 | STEAP4   |
| cg00684178 | 0.5271242  | -163.8239 | -0.2003419 | 0.7274661 | NEU4     |
| cg08474603 | 0.4495813  | -163.8376 | -0.2167383 | 0.6663196 | CRP      |
| cg20342105 | 0.2645445  | -164.0333 | -0.2347074 | 0.4992518 | BSCL2    |
| cg05190718 | 0.4868271  | -164.1129 | -0.2095499 | 0.696377  | CASQ2    |
| cg25193494 | 0.3795384  | -164.1908 | -0.2276791 | 0.6072175 | FLJ20186 |



|            |            |           |            |           |          |
|------------|------------|-----------|------------|-----------|----------|
| cg09686308 | 0.2520704  | -164.2334 | -0.2346686 | 0.486739  | CIB3     |
| cg00463848 | 0.5202302  | -164.5338 | -0.2023103 | 0.7225405 | KRT2A    |
| cg00962799 | 0.4972267  | -164.6764 | -0.2076032 | 0.70483   | SSX8     |
| cg12228229 | 0.5259702  | -164.6785 | -0.2010276 | 0.7269978 | DLG4     |
| cg04761824 | 0.4860111  | -164.6785 | -0.2100153 | 0.6960264 | DEC1     |
| cg14696870 | 0.4018438  | -164.7306 | -0.2250406 | 0.6268843 | FCER1A   |
| cg12891678 | 0.1800195  | -164.7804 | -0.2294143 | 0.4094338 | SPRR2D   |
| cg24959428 | 0.3664176  | -164.8178 | -0.229603  | 0.5960206 | GBP6     |
| cg11405695 | 0.2887962  | -164.89   | -0.2350741 | 0.5238702 | ATAD3C   |
| cg19096475 | 0.3954901  | -165.3203 | -0.2262816 | 0.6217718 | ASAM     |
| cg25994725 | 0.3284299  | -165.6335 | -0.2335966 | 0.5620265 | C6orf81  |
| cg13813391 | 0.5268831  | -165.643  | -0.2012666 | 0.7281497 | CMTM2    |
| cg13745346 | 0.4608822  | -165.6597 | -0.2156015 | 0.6764838 | CBFA2T3  |
| cg14550066 | 0.2985745  | -165.8755 | -0.2354167 | 0.5339913 | NCR1     |
| cg05696092 | 0.2486613  | -166.3861 | -0.2361182 | 0.4847794 | NOSIP    |
| cg17915429 | 0.4373794  | -166.5669 | -0.2204044 | 0.6577839 | PGLYRP2  |
| cg17288121 | 0.4200761  | -166.5718 | -0.2233145 | 0.6433907 | DEFB103A |
| cg04893119 | 0.202651   | -166.5737 | -0.233454  | 0.436105  | PI15     |
| cg27337148 | 0.2028704  | -166.8607 | -0.2336841 | 0.4365545 | CAMK1G   |
| cg20305726 | 0.3052894  | -167.1226 | -0.235947  | 0.5412364 | DEFB126  |
| cg11505080 | 0.1753354  | -167.1772 | -0.2305676 | 0.405903  | GPR173   |
| cg13482233 | 0.5004858  | -167.228  | -0.2081434 | 0.7086292 | HEPH     |
| cg26895595 | 0.267673   | -167.2844 | -0.2369873 | 0.5046603 | MAGEB3   |
| cg13760253 | 0.4250703  | -167.5545 | -0.2230454 | 0.6481158 | DNAJC5B  |
| cg01248426 | 0.1986101  | -167.58   | -0.2337939 | 0.432404  | ATP6V0D2 |
| cg00476577 | 0.1026622  | -167.6949 | -0.2143964 | 0.3170587 | ZNF217   |
| cg02311163 | 0.3871416  | -167.8128 | -0.2288678 | 0.6160095 | SEMG2    |
| cg06415153 | 0.3160853  | -167.8619 | -0.2358528 | 0.5519381 | PITPNM2  |
| cg02787991 | 0.06907104 | -167.934  | -0.2020282 | 0.2710993 | SECTM1   |
| cg00415993 | 0.2159729  | -168.1362 | -0.2357567 | 0.4517296 | F2RL2    |
| cg02786019 | 0.3490456  | -168.3644 | -0.2335734 | 0.5826191 | TRPV6    |
| cg25545210 | 0.4722593  | -168.4197 | -0.2147719 | 0.6870312 | KRTHA4   |
| cg20176989 | 0.3674747  | -168.501  | -0.2317132 | 0.5991879 | KIR3DL2  |
| cg19067730 | 0.08652589 | -168.5388 | -0.2095201 | 0.296046  | PPGB     |
| cg07072643 | 0.324684   | -168.6833 | -0.2358161 | 0.5605    | EMR3     |
| cg21094154 | 0.5118819  | -168.9326 | -0.2063652 | 0.7182471 | TNFSF11  |
| cg05755354 | 0.3227683  | -168.9326 | -0.2361074 | 0.5588757 | FRMD4A   |
| cg08023751 | 0.5233502  | -169.0672 | -0.2037136 | 0.7270638 | MERTK    |
| cg26200585 | 0.3510107  | -169.3282 | -0.2339717 | 0.5849823 | PRX      |
| cg21122774 | 0.5288978  | -169.3793 | -0.2025092 | 0.7314069 | SARDH    |
| cg01135626 | 0.3508408  | -169.5291 | -0.2341154 | 0.5849562 | CDX4     |
| cg21789545 | 0.2376439  | -169.7408 | -0.2381341 | 0.475778  | COL9A1   |
| cg04995095 | 0.2861661  | -169.8692 | -0.2384805 | 0.5246466 | CD300E   |
| cg21745164 | 0.2970756  | -169.9121 | -0.2381449 | 0.5352205 | LOC63928 |
| cg09256683 | 0.3318933  | -169.9559 | -0.2360753 | 0.5679686 | CCL14    |

|            |            |           |            |           |           |
|------------|------------|-----------|------------|-----------|-----------|
| cg23812886 | 0.293957   | -170.0014 | -0.2383255 | 0.5322825 | SSX5      |
| cg19642007 | 0.4515478  | -170.0487 | -0.2196898 | 0.6712376 | TNNT3     |
| cg24862483 | 0.08827329 | -170.1185 | -0.2114568 | 0.2997301 | CD300LG   |
| cg00057593 | 0.3380913  | -170.1261 | -0.2356733 | 0.5737647 | GML       |
| cg15423764 | 0.433304   | -170.1617 | -0.2230781 | 0.6563821 | GLYAT     |
| cg08952029 | 0.2331421  | -170.1858 | -0.2382709 | 0.471413  | CHRD2     |
| cg09837803 | 0.2877089  | -170.3389 | -0.2387615 | 0.5264704 | IL16      |
| cg26062856 | 0.38914    | -170.392  | -0.2301055 | 0.6192455 | ATP10A    |
| cg24623694 | 0.219832   | -170.4415 | -0.2377102 | 0.4575422 | PRX       |
| cg03552103 | 0.3344351  | -170.6925 | -0.2363383 | 0.5707734 | SEPT10    |
| cg08356693 | 0.3005941  | -170.853  | -0.2386201 | 0.5392143 | ITLN1     |
| cg24816455 | 0.2388616  | -171.2845 | -0.2392763 | 0.4781379 | SEMA3B    |
| cg16222568 | 0.4992177  | -171.5036 | -0.2105034 | 0.709721  | APEG1     |
| cg23022999 | 0.410051   | -171.5639 | -0.2276976 | 0.6377487 | FLJ45909  |
| cg19464252 | 0.2670209  | -171.5659 | -0.2399244 | 0.5069454 | FBS1      |
| cg06836849 | 0.1550003  | -171.6429 | -0.2306228 | 0.3856231 | SLC17A8   |
| cg11554507 | 0.5153831  | -171.7493 | -0.2068728 | 0.7222558 | NEUROD6   |
| cg26189983 | 0.1262497  | -171.8481 | -0.2244957 | 0.3507454 | TNFRSF1B  |
| cg21519900 | 0.2898094  | -171.9381 | -0.2397571 | 0.5295665 | C20orf186 |
| cg04484789 | 0.5432475  | -171.9461 | -0.200081  | 0.7433285 | KRT25B    |
| cg08403419 | 0.4206955  | -172.3644 | -0.2264225 | 0.647118  | RLN3R2    |
| cg16381688 | 0.3098056  | -172.6944 | -0.2393318 | 0.5491374 | THEM2     |
| cg07173760 | 0.2707386  | -172.7973 | -0.2407282 | 0.5114667 | CLC       |
| cg18192417 | 0.1511996  | -172.8857 | -0.2308531 | 0.3820527 | NEBL      |
| cg13705284 | 0.272122   | -173.1626 | -0.2409548 | 0.5130768 | ACOX2     |
| cg21209356 | 0.4697278  | -173.177  | -0.217699  | 0.6874267 | CSF2RB    |
| cg25141995 | 0.2794072  | -173.4225 | -0.241009  | 0.5204162 | VDAC1     |
| cg12992720 | 0.224644   | -173.5123 | -0.2401917 | 0.4648356 | EDG4      |
| cg05559445 | 0.2381468  | -173.6704 | -0.2409189 | 0.4790657 | CDKN1C    |
| cg00556408 | 0.5173299  | -173.8068 | -0.2073564 | 0.7246863 | TMPRSS6   |
| cg11052143 | 0.1721704  | -173.8951 | -0.2351971 | 0.4073675 | ALS2CR11  |
| cg11432797 | 0.4781888  | -173.9263 | -0.2163012 | 0.6944901 | SPN       |
| cg05301852 | 0.3587352  | -173.9263 | -0.2359447 | 0.59468   | FABP1     |
| cg24698533 | 0.463597   | -174.1518 | -0.2194428 | 0.6830398 | LYZL2     |
| cg11061975 | 0.3062831  | -174.2061 | -0.2404965 | 0.5467796 | SIRPB2    |
| cg09863066 | 0.1916284  | -174.6378 | -0.2382662 | 0.4298946 | PVALB     |
| cg07892051 | 0.4135725  | -174.9304 | -0.2289844 | 0.6425568 | AKAP3     |
| cg05556717 | 0.362697   | -175.2288 | -0.2362531 | 0.5989501 | CCL26     |
| cg27132814 | 0.3591621  | -175.3665 | -0.236737  | 0.5958991 | C20orf79  |
| cg13407883 | 0.3527032  | -175.4345 | -0.2374839 | 0.5901871 | SIGLEC9   |
| cg08321330 | 0.4932618  | -175.5022 | -0.2137533 | 0.7070151 | TPSB2     |
| cg07846167 | 0.1084243  | -175.5422 | -0.2224821 | 0.3309064 | FBLIM1    |
| cg03956628 | 0.164266   | -175.5446 | -0.2351976 | 0.3994637 | MLH1      |
| cg04245402 | 0.2555839  | -176.0273 | -0.2429014 | 0.4984854 | C19orf21  |
| cg25712380 | 0.4921199  | -176.069  | -0.2142794 | 0.7063993 | GRAP2     |

|            |            |           |            |           |              |
|------------|------------|-----------|------------|-----------|--------------|
| cg03752087 | 0.4659134  | -176.227  | -0.2200024 | 0.6859157 | CASP14       |
| cg14620221 | 0.544175   | -176.3909 | -0.2017685 | 0.7459434 | OR8B8        |
| cg24866437 | 0.5196635  | -176.3911 | -0.2079632 | 0.7276267 | ALPK1        |
| cg03741352 | 0.5294456  | -176.3968 | -0.2055436 | 0.7349892 | LCE3C        |
| cg09971646 | 0.1720424  | -176.4669 | -0.237093  | 0.4091354 | DLK1         |
| cg22545356 | 0.5298432  | -176.5656 | -0.2055191 | 0.7353623 | MMRN2        |
| cg20401945 | 0.1450611  | -176.6759 | -0.2325305 | 0.3775916 | ASPHD1       |
| cg05330360 | 0.2983609  | -177.3285 | -0.2428762 | 0.5412371 | ZPBP2        |
| cg16792160 | 0.3171225  | -177.413  | -0.241823  | 0.5589455 | ASAH2        |
| cg09799714 | 0.492415   | -177.467  | -0.2148734 | 0.7072884 | PDZD3        |
| cg18294257 | 0.1512761  | -177.8764 | -0.2346494 | 0.3859255 | SEC14L3      |
| cg21207418 | 0.524076   | -177.9279 | -0.2075572 | 0.7316332 | ACP5         |
| cg14722162 | 0.4227136  | -177.9988 | -0.2290908 | 0.6518043 | C5orf20      |
| cg01507173 | 0.4016342  | -178.0601 | -0.2325752 | 0.6342095 | IL1F5        |
| cg18462653 | 0.1670824  | -178.2321 | -0.23764   | 0.4047224 | DEFB119      |
| cg14321743 | 0.41698    | -178.2968 | -0.2302265 | 0.6472065 | PLA2G2D      |
| cg15905634 | 0.4952438  | -178.5877 | -0.2147511 | 0.7099949 | TAS2R60      |
| cg24898863 | 0.1523627  | -178.5877 | -0.2353886 | 0.3877513 | S100A8       |
| cg23047271 | 0.1118618  | -178.6452 | -0.2259253 | 0.3377871 | PRICKLE2     |
| cg18221897 | 0.4747705  | -179.0287 | -0.2195053 | 0.6942758 | KIR2DL1      |
| cg15798153 | 0.1848606  | -179.0462 | -0.2406797 | 0.4255403 | PFTK1        |
| cg20781967 | 0.1944294  | -179.3583 | -0.2419721 | 0.4364015 | NINJ2        |
| cg04623837 | 0.08405039 | -179.3812 | -0.2173758 | 0.3014262 | HCG9         |
| cg22088368 | 0.2889704  | -179.5967 | -0.2447318 | 0.5337022 | MGC3520<br>6 |
| cg21301440 | 0.1142713  | -179.599  | -0.2273628 | 0.3416341 | CYGB         |
| cg19464944 | 0.3009501  | -179.976  | -0.2444182 | 0.5453683 | FCGR1A       |
| cg04143809 | 0.3292805  | -180.1863 | -0.2425717 | 0.5718522 | FLJ39822     |
| cg24489015 | 0.3546581  | -180.331  | -0.2401475 | 0.5948056 | LPO          |
| cg09418321 | 0.2335984  | -180.7991 | -0.2456488 | 0.4792472 | DYRK4        |
| cg15417244 | 0.5006391  | -180.8404 | -0.2145427 | 0.7151818 | PDZRN4       |
| cg00174500 | 0.2385725  | -180.8847 | -0.2458715 | 0.4844441 | CMTM5        |
| cg22780475 | 0.3386708  | -180.9333 | -0.242165  | 0.5808358 | CBLC         |
| cg05135288 | 0.2294926  | -181.1831 | -0.2457512 | 0.4752438 | RHOT2        |
| cg15590780 | 0.2510184  | -181.1935 | -0.2463218 | 0.4973402 | USH2A        |
| cg07426848 | 0.4966059  | -181.4606 | -0.2157696 | 0.7123755 | S100A3       |
| cg20692181 | 0.3773851  | -181.53   | -0.23801   | 0.6153951 | RETN         |
| cg21312148 | 0.2843646  | -181.5494 | -0.2461383 | 0.5305029 | LCE2D        |
| cg07073964 | 0.4334992  | -181.6257 | -0.2290538 | 0.662553  | PRSSL1       |
| cg03366382 | 0.521148   | -182.1225 | -0.2101396 | 0.7312876 | INS          |
| cg12610070 | 0.0760156  | -182.1621 | -0.216488  | 0.2925036 | TSPAN15      |
| cg27349244 | 0.4199599  | -182.2549 | -0.2318037 | 0.6517636 | MLXIP        |
| cg25778479 | 0.1499293  | -182.4929 | -0.2378628 | 0.3877921 | ANKMY2       |
| cg03329572 | 0.4679669  | -182.5371 | -0.2226577 | 0.6906246 | FCRL5        |
| cg11819637 | 0.4160801  | -182.5697 | -0.2326434 | 0.6487235 | THPO         |

|            |            |           |            |           |          |
|------------|------------|-----------|------------|-----------|----------|
| cg07864297 | 0.1722869  | -182.6507 | -0.2416677 | 0.4139546 | ESRRB    |
| cg20261167 | 0.1710888  | -182.9232 | -0.2416915 | 0.4127803 | SPP1     |
| cg19756068 | 0.3971438  | -183.0575 | -0.2359844 | 0.6331282 | CYP2B6   |
| cg17446142 | 0.5528998  | -183.542  | -0.2024447 | 0.7553446 | GDF9     |
| cg25107791 | 0.3337537  | -183.6117 | -0.2442094 | 0.5779631 | CLPS     |
| cg19592945 | 0.1788472  | -183.6962 | -0.2432949 | 0.4221421 | P2RXL1   |
| cg08886154 | 0.2985988  | -184.0688 | -0.2470834 | 0.5456822 | PAX4     |
| cg01204985 | 0.5532609  | -184.3357 | -0.2026684 | 0.7559292 | LILRA4   |
| cg06906435 | 0.2883072  | -184.4396 | -0.247806  | 0.5361133 | FLJ25773 |
| cg14652095 | 0.2623776  | -184.8415 | -0.2487125 | 0.5110902 | HIST1H1A |
| cg19587887 | 0.4716525  | -185.213  | -0.2231277 | 0.6947802 | PSKH2    |
| cg07017706 | 0.5008922  | -185.329  | -0.2165082 | 0.7174003 | K6IRS3   |
| cg02097420 | 0.422437   | -185.378  | -0.2329727 | 0.6554097 | HRG      |
| cg11161417 | 0.4324627  | -185.4333 | -0.2311696 | 0.6636322 | SPACA3   |
| cg11297236 | 0.2600591  | -185.4928 | -0.2491516 | 0.5092107 | PDILT    |
| cg17910564 | 0.3341281  | -185.5929 | -0.2453319 | 0.57946   | VDAC3    |
| cg17542495 | 0.3332354  | -186.4919 | -0.2459278 | 0.5791631 | GJB1     |
| cg01227741 | 0.5304788  | -186.58   | -0.2096636 | 0.7401425 | GIMAP7   |
| cg08157292 | 0.3355957  | -186.6925 | -0.2458177 | 0.5814134 | PPP1R7   |
| cg02688643 | 0.4987094  | -186.7775 | -0.2176711 | 0.7163805 | MGST2    |
| cg02064402 | 0.5156044  | -186.9411 | -0.2136138 | 0.7292182 | SLC6A18  |
| cg27420123 | 0.495501   | -187.0249 | -0.2185436 | 0.7140445 | FSHB     |
| cg11263296 | 0.08507877 | -187.0776 | -0.2238081 | 0.3088868 | CCDC64   |
| cg13530039 | 0.2840117  | -187.0941 | -0.2496217 | 0.5336334 | CHRM1    |
| cg10853416 | 0.4857021  | -187.2482 | -0.2209289 | 0.7066309 | MS4A7    |
| cg11898695 | 0.5226111  | -187.3344 | -0.2120146 | 0.7346257 | PTCRA    |
| cg13859324 | 0.250051   | -187.4358 | -0.250404  | 0.500455  | UNC45B   |
| cg01359534 | 0.548995   | -187.5836 | -0.2051503 | 0.7541453 | AQP10    |
| cg01375994 | 0.3060479  | -187.6272 | -0.2488029 | 0.5548508 | MXRA5    |
| cg22805308 | 0.2734386  | -187.7448 | -0.2503753 | 0.5238139 | PLEKHG5  |
| cg01678091 | 0.5450177  | -187.7661 | -0.2063077 | 0.7513254 | MAGEL2   |
| cg07443748 | 0.3290897  | -188.3692 | -0.2474139 | 0.5765036 | CESK1    |
| cg18849169 | 0.4742111  | -188.4939 | -0.2240961 | 0.6983072 | GPX3     |
| cg23704362 | 0.2981484  | -188.4939 | -0.2498056 | 0.547954  | C8orf46  |
| cg08763351 | 0.540401   | -188.5065 | -0.2078512 | 0.7482522 | SPRR4    |
| cg23350580 | 0.5591456  | -188.8586 | -0.202849  | 0.7619945 | TBC1D3C  |
| cg00319692 | 0.2488716  | -188.8727 | -0.2513249 | 0.5001965 | ATP6V0D2 |
| cg23244913 | 0.1293613  | -188.9393 | -0.2383253 | 0.3676866 | HCG9     |
| cg20657421 | 0.5100769  | -189.0188 | -0.2159013 | 0.7259783 | CCL4     |
| cg24621042 | 0.2923678  | -189.1393 | -0.2505191 | 0.5428869 | SERPINA1 |
| cg25462291 | 0.127876   | -189.1721 | -0.2381538 | 0.3660297 | HEYL     |
| cg23065097 | 0.1913309  | -189.3079 | -0.24867   | 0.4400008 | FKBP1B   |
| cg05955301 | 0.259077   | -189.4541 | -0.2517078 | 0.5107849 | PRELP    |
| cg22341310 | 0.1815527  | -189.5454 | -0.2477808 | 0.4293335 | ZNF541   |
| cg13397379 | 0.4021219  | -189.8379 | -0.2387664 | 0.6408883 | OR2C3    |

|            |            |           |            |           |               |
|------------|------------|-----------|------------|-----------|---------------|
| cg03860768 | 0.405689   | -189.9223 | -0.2382175 | 0.6439065 | BLK           |
| cg24353217 | 0.5626703  | -189.9816 | -0.2023073 | 0.7649776 | MYL2          |
| cg11237817 | 0.3595492  | -190.326  | -0.2452187 | 0.6047679 | KIR3DL3       |
| cg10129493 | 0.5466718  | -190.3601 | -0.2069147 | 0.7535865 | CD33          |
| cg19447966 | 0.544962   | -190.5143 | -0.2074435 | 0.7524056 | TEAD1         |
| cg07220939 | 0.3824115  | -190.7815 | -0.2423416 | 0.6247531 | SLC22A12      |
| cg26385286 | 0.2207925  | -190.837  | -0.251871  | 0.4726635 | GCNT2         |
| cg18239253 | 0.3085514  | -190.8682 | -0.2505806 | 0.559132  | DEFB32        |
| cg17699374 | 0.2096387  | -191.0643 | -0.2513902 | 0.4610289 | MGC3520<br>6  |
| cg19372178 | 0.2190659  | -191.2542 | -0.2520638 | 0.4711297 | TMEM16G       |
| cg22456522 | 0.1882962  | -191.2784 | -0.2497362 | 0.4380323 | LILRB3        |
| cg23114594 | 0.4865209  | -191.2899 | -0.2225825 | 0.7091034 | C10orf30      |
| cg20856834 | 0.391454   | -191.3356 | -0.2412655 | 0.6327196 | OR12D3        |
| cg06226384 | 0.1584049  | -191.3372 | -0.2458228 | 0.4042277 | CACNG5        |
| cg23464269 | 0.2908892  | -191.6624 | -0.2521423 | 0.5430315 | UGT1A3        |
| cg01637734 | 0.3734074  | -191.707  | -0.2441403 | 0.6175476 | CD5L          |
| cg00466436 | 0.2602707  | -191.7123 | -0.253141  | 0.5134117 | DEFB126       |
| cg26390526 | 0.5707473  | -191.7836 | -0.2006925 | 0.7714398 | FLG           |
| cg16794682 | 0.5456471  | -191.8445 | -0.2077985 | 0.7534457 | CCND1         |
| cg26391080 | 0.5057938  | -192.1013 | -0.2183087 | 0.7241026 | SH2D4B        |
| cg09492887 | 0.1118676  | -192.2669 | -0.236391  | 0.3482586 | SLC26A5       |
| cg11584690 | 0.1220118  | -192.4518 | -0.2391968 | 0.3612086 | ZNF574        |
| cg26420196 | 0.2191599  | -192.5803 | -0.2529665 | 0.4721264 | GAS6          |
| cg19623751 | 0.3721772  | -192.581  | -0.2447893 | 0.6169665 | CEACAM7       |
| cg03872376 | 0.3943676  | -192.9887 | -0.241671  | 0.6360386 | ZP4           |
| cg08816023 | 0.282591   | -193.201  | -0.2534659 | 0.5360569 | FGF1          |
| cg12547930 | 0.3695998  | -193.2702 | -0.2455121 | 0.6151119 | WFDC6         |
| cg19421752 | 0.1532586  | -193.4595 | -0.2464832 | 0.3997418 | SLC6A18       |
| cg00501366 | 0.3396928  | -193.4658 | -0.2492948 | 0.5889876 | ALOX12B       |
| cg23765993 | 0.2265384  | -193.724  | -0.2540309 | 0.4805694 | SPINLW1       |
| cg13125510 | 0.2167867  | -193.7425 | -0.2536159 | 0.4704025 | C11orf44      |
| cg15895197 | 0.1532639  | -193.7812 | -0.2467191 | 0.399983  | EMILIN1       |
| cg07879977 | 0.2707552  | -193.864  | -0.254287  | 0.5250422 | OR1F1         |
| cg16899306 | 0.3768471  | -194.0129 | -0.2448877 | 0.6217347 | HLA-DQB2      |
| cg23807646 | 0.3482956  | -194.145  | -0.2487082 | 0.5970038 | SLC26A8       |
| cg19987219 | 0.423977   | -194.1604 | -0.2371205 | 0.6610975 | FLJ32011      |
| cg04901273 | 0.5331739  | -194.2573 | -0.2121556 | 0.7453295 | TBC1D3        |
| cg08260891 | 0.07170174 | -194.3537 | -0.2243779 | 0.2960796 | PPGB          |
| cg01987509 | 0.3350521  | -194.3646 | -0.2502983 | 0.5853504 | PGR           |
| cg11456838 | 0.2913683  | -194.5312 | -0.253859  | 0.5452273 | LOC20245<br>9 |
| cg04311964 | 0.5595344  | -194.7117 | -0.2050436 | 0.764578  | LYPD2         |
| cg16176600 | 0.5180808  | -195.0281 | -0.2164437 | 0.7345245 | FRK           |
| cg04675937 | 0.3883995  | -195.1147 | -0.243724  | 0.6321235 | CDKN2B        |

|            |            |           |            |           |           |
|------------|------------|-----------|------------|-----------|-----------|
| cg05600717 | 0.07868465 | -195.3764 | -0.2279151 | 0.3065997 | FLJ13639  |
|            |            |           |            |           | LOC13232  |
| cg03916421 | 0.1749437  | -195.3972 | -0.2510818 | 0.4260255 | 1         |
| cg08784110 | 0.2847883  | -195.9412 | -0.2550288 | 0.5398171 | MAS1      |
| cg26457013 | 0.3860292  | -195.9487 | -0.2445239 | 0.6305531 | TMEM86B   |
| cg12029639 | 0.187334   | -196.0352 | -0.252923  | 0.440257  | MAB21L1   |
| cg24840099 | 0.306994   | -196.3502 | -0.2539271 | 0.5609211 | MSX1      |
| cg03473518 | 0.07966833 | -196.3669 | -0.2290527 | 0.308721  | GJB6      |
| cg02124291 | 0.4835402  | -196.7791 | -0.2257245 | 0.7092648 | OR7A5     |
| cg01993576 | 0.1425563  | -197.1921 | -0.2472002 | 0.3897566 | SLC29A1   |
| cg27069753 | 0.2675513  | -197.2271 | -0.2564392 | 0.5239905 | ELA3B     |
| cg07947016 | 0.2255829  | -197.267  | -0.2563097 | 0.4818926 | KLK2      |
| cg07790638 | 0.4195839  | -197.2679 | -0.2394649 | 0.6590487 | LOC91431  |
| cg20423977 | 0.5002202  | -197.5256 | -0.2220181 | 0.7222383 | PLAC4     |
| cg27383362 | 0.4146546  | -197.5769 | -0.2405222 | 0.6551768 | ATAD3C    |
| cg10300154 | 0.3792581  | -197.588  | -0.2464147 | 0.6256728 | MGC5297   |
| cg12069309 | 0.05796274 | -197.6072 | -0.2209702 | 0.278933  | SEMA3B    |
| cg09995854 | 0.4346041  | -197.6072 | -0.2367494 | 0.6713535 | IL1F8     |
| cg18988110 | 0.2048679  | -197.6072 | -0.2554746 | 0.4603425 | ATAD4     |
| cg19903229 | 0.2790282  | -197.7318 | -0.256375  | 0.5354032 | C14orf105 |
| cg14532417 | 0.5495685  | -197.7729 | -0.2090564 | 0.758625  | TBC1D3    |
| cg24214470 | 0.4805924  | -198.7048 | -0.2272708 | 0.7078633 | SERPINF1  |
| cg06825166 | 0.2774212  | -199.1299 | -0.257271  | 0.5346922 | TMEM10    |
| cg18807515 | 0.3739043  | -199.1416 | -0.2480186 | 0.621923  | PRAMEF2   |
| cg10986043 | 0.269507   | -199.1659 | -0.2575749 | 0.527082  | TCAP      |
| cg12954718 | 0.2331019  | -199.3808 | -0.2578864 | 0.4909883 | USP6      |
| cg17398613 | 0.5431722  | -199.4206 | -0.2114824 | 0.7546546 | SLC37A1   |
| cg01917648 | 0.2670681  | -199.7622 | -0.2580062 | 0.5250742 | SPIC      |
| cg26349773 | 0.5298046  | -199.9836 | -0.2153676 | 0.7451722 | ATP6V0A4  |
| cg19841506 | 0.1068064  | -200.1482 | -0.2408544 | 0.3476608 | ZMYND15   |
| cg12949760 | 0.4624073  | -200.2698 | -0.2321237 | 0.694531  | KCNQ1     |
| cg12067287 | 0.5452892  | -200.3916 | -0.2112646 | 0.7565538 | MYOM1     |
| cg14942312 | 0.446717   | -200.3966 | -0.2355795 | 0.6822965 | GPR119    |
| cg04520391 | 0.5324119  | -200.4698 | -0.2148566 | 0.7472685 | PRB2      |
| cg16739580 | 0.3859892  | -200.4979 | -0.2468791 | 0.6328683 | POP2      |
| cg07950803 | 0.2484412  | -200.5692 | -0.2587844 | 0.5072255 | CD1A      |
| cg26218269 | 0.2301659  | -200.6104 | -0.2586074 | 0.4887733 | MAB21L2   |
| cg06259570 | 0.3749972  | -200.6784 | -0.2486657 | 0.6236629 | MMP27     |
| cg08878744 | 0.2563497  | -200.9959 | -0.2589878 | 0.5153375 | LCE1B     |
| cg14141399 | 0.2476458  | -201.0746 | -0.2591035 | 0.5067493 | HAS1      |
| cg22971191 | 0.2577263  | -201.1252 | -0.2590497 | 0.516776  | SLC10A2   |
| cg21723486 | 0.3344979  | -201.3726 | -0.254266  | 0.5887639 | TP73L     |
| cg13281868 | 0.4199992  | -201.9008 | -0.2416415 | 0.6616407 | C6orf142  |
|            |            |           |            |           | LOC34817  |
| cg17091851 | 0.2682325  | -201.9155 | -0.2592849 | 0.5275174 | 4         |

|            |            |           |            |           |           |
|------------|------------|-----------|------------|-----------|-----------|
| cg14102807 | 0.4628877  | -202.5518 | -0.2330446 | 0.6959323 | CD19      |
| cg10368842 | 0.3649952  | -202.6897 | -0.251159  | 0.6161542 | C10orf81  |
| cg27160701 | 0.3247343  | -203.3379 | -0.2563577 | 0.5810921 | SBEM      |
| cg14511156 | 0.2322271  | -203.3996 | -0.2604138 | 0.4926409 | OSCAR     |
| cg00896220 | 0.4733896  | -203.6741 | -0.2311351 | 0.7045248 | CCL4L2    |
| cg26523005 | 0.2885751  | -203.9507 | -0.2595774 | 0.5481524 | ZNF662    |
| cg18982568 | 0.3369105  | -204.1849 | -0.2555232 | 0.5924338 | KRT1B     |
| cg25168545 | 0.2251458  | -204.5314 | -0.2609497 | 0.4860955 | GIMAP1    |
| cg26796190 | 0.05121354 | -204.7078 | -0.223314  | 0.2745275 | PYY       |
| cg06142324 | 0.3849565  | -204.7078 | -0.2491695 | 0.634126  | FLJ25530  |
| cg05112299 | 0.2367335  | -204.8406 | -0.261382  | 0.4981154 | OR7A17    |
| cg10837843 | 0.1068444  | -205.0626 | -0.2444846 | 0.351329  | DUSP1     |
| cg16466334 | 0.4114963  | -205.2865 | -0.2448592 | 0.6563554 | MMP3      |
| cg22983092 | 0.3398155  | -205.3493 | -0.2558181 | 0.5956336 | KRT25A    |
| cg25691167 | 0.04296111 | -205.4303 | -0.2197262 | 0.2626873 | FERD3L    |
| cg17001430 | 0.5184201  | -205.5039 | -0.220631  | 0.7390511 | KIF25     |
| cg05921699 | 0.3834912  | -205.7957 | -0.249957  | 0.6334482 | CD79A     |
| cg26628847 | 0.2424536  | -206.1199 | -0.2622117 | 0.5046653 | PIP       |
| cg21985470 | 0.27349    | -206.162  | -0.2616197 | 0.5351098 | PKLR      |
| cg02694395 | 0.2835898  | -206.201  | -0.2611654 | 0.5447552 | FMO4      |
| cg03309967 | 0.3628917  | -206.5321 | -0.2534499 | 0.6163416 | PSENEN    |
| cg18971671 | 0.4581695  | -206.8191 | -0.2359996 | 0.6941691 | TULP2     |
| cg16377880 | 0.3408805  | -206.909  | -0.2565317 | 0.5974121 | CYP4F3    |
| cg08887581 | 0.4607326  | -207.0609 | -0.2355307 | 0.6962634 | C1orf64   |
| cg20932053 | 0.4846151  | -207.1424 | -0.2299456 | 0.7145607 | CPM       |
| cg01785568 | 0.2892318  | -207.1489 | -0.2613959 | 0.5506277 | MSX1      |
| cg02202484 | 0.361303   | -207.1892 | -0.2540217 | 0.6153247 | SPRR4     |
| cg13916742 | 0.5826701  | -207.2329 | -0.2027664 | 0.7854365 | SCGB1D1   |
| cg07026910 | 0.4975863  | -207.4368 | -0.2268423 | 0.7244287 | INPP5D    |
| cg19824441 | 0.3790114  | -207.617  | -0.251599  | 0.6306103 | ADMR      |
| cg22478614 | 0.2971772  | -207.8334 | -0.2612617 | 0.5584389 | DEFB4     |
| cg21643191 | 0.3713018  | -207.9306 | -0.2529476 | 0.6242494 | ABCB5     |
| cg07895149 | 0.04032382 | -207.9989 | -0.2203582 | 0.260682  | FAM26B    |
| cg21964481 | 0.4127044  | -208.2769 | -0.2460754 | 0.6587797 | SLC34A3   |
| cg18434152 | 0.4502668  | -208.5515 | -0.238529  | 0.6887958 | PROK1     |
| cg24812523 | 0.3824757  | -208.66   | -0.2515632 | 0.6340389 | AKAP6     |
| cg03387497 | 0.5722589  | -208.7511 | -0.2064905 | 0.7787495 | C20orf179 |
| cg08390209 | 0.3264298  | -208.9224 | -0.2592561 | 0.5856858 | CDKN2B    |
| cg05985767 | 0.4258343  | -209.0487 | -0.2438865 | 0.6697208 | ANPEP     |
| cg21458041 | 0.3722045  | -209.218  | -0.2534621 | 0.6256666 | TNP2      |
| cg01072821 | 0.3752697  | -209.4346 | -0.2530968 | 0.6283666 | UNQ9391   |
| cg15060813 | 0.2450855  | -209.5837 | -0.2643418 | 0.5094273 | LRFN3     |
| cg21407055 | 0.5834165  | -209.5904 | -0.2033554 | 0.7867719 | ART1      |
| cg21256656 | 0.4801772  | -209.7368 | -0.2321276 | 0.7123048 | KLK6      |
| cg25141490 | 0.2387892  | -209.788  | -0.2644728 | 0.503262  | IL17B     |

|            |            |           |            |           |           |
|------------|------------|-----------|------------|-----------|-----------|
| cg18490846 | 0.2616155  | -210.0518 | -0.2643474 | 0.5259629 | C17orf73  |
| cg22247240 | 0.351932   | -210.3811 | -0.2569668 | 0.6088988 | C14orf115 |
| cg12732155 | 0.1977144  | -210.7071 | -0.2635661 | 0.4612805 | LAPTM5    |
| cg09748975 | 0.5205587  | -210.8541 | -0.222174  | 0.7427327 | MSX1      |
| cg26504906 | 0.2178204  | -211.2484 | -0.264962  | 0.4827824 | PRSS16    |
| cg14587868 | 0.3956705  | -211.3521 | -0.2506548 | 0.6463253 | TGM1      |
| cg12639234 | 0.294306   | -211.6249 | -0.2636066 | 0.5579125 | NAT2      |
| cg14120879 | 0.5368395  | -211.8699 | -0.2180349 | 0.7548744 | DEFB105A  |
| cg19055231 | 0.04923646 | -212.3945 | -0.2283052 | 0.2775417 | STAC      |
| cg00795812 | 0.1355233  | -212.5402 | -0.2566716 | 0.392195  | PDCD1     |
| cg10210238 | 0.1903151  | -212.7219 | -0.2642936 | 0.4546087 | CDKN2B    |
| cg01837574 | 0.2695171  | -212.7394 | -0.2656398 | 0.535157  | TRAPPC1   |
| cg09923671 | 0.4396296  | -213.0279 | -0.2428285 | 0.682458  | GATA5     |
| cg04557383 | 0.08205026 | -213.9969 | -0.2432006 | 0.3252509 | MT1H      |
| cg18530716 | 0.09381244 | -214.0065 | -0.2471341 | 0.3409466 | SLC16A11  |
| cg00518911 | 0.2465138  | -214.8405 | -0.2674529 | 0.5139667 | HOXA10    |
| cg26111757 | 0.4456798  | -215.2077 | -0.242453  | 0.6881328 | C20orf185 |
| cg08815403 | 0.3099729  | -216.0585 | -0.2647113 | 0.5746841 | HSD17B13  |
| cg06385087 | 0.05499241 | -216.0808 | -0.2337874 | 0.2887798 | CTSZ      |
| cg01530101 | 0.3708211  | -216.2955 | -0.2571624 | 0.6279835 | KCNQ1DN   |
| cg26822241 | 0.457723   | -216.349  | -0.2402183 | 0.6979414 | CYP2C9    |
| cg01367992 | 0.3264466  | -216.349  | -0.2631792 | 0.5896258 | LY9       |
| cg05654163 | 0.3737469  | -216.3546 | -0.2567343 | 0.6304811 | SLC39A2   |
| cg14826683 | 0.2730325  | -216.5878 | -0.2676549 | 0.5406874 | SPRR2D    |
| cg02280309 | 0.4073631  | -216.5989 | -0.2509618 | 0.658325  | PKLR      |
| cg23213217 | 0.2914748  | -216.5989 | -0.2665497 | 0.5580245 | DEGS1     |
| cg07676849 | 0.3217069  | -216.8164 | -0.2639503 | 0.5856572 | FOLR3     |
| cg09142399 | 0.4043372  | -216.8766 | -0.2516655 | 0.6560028 | CRYZ      |
| cg25043279 | 0.4414744  | -216.9049 | -0.244122  | 0.6855964 | C7orf33   |
| cg23988567 | 0.549861   | -216.9933 | -0.2161251 | 0.7659861 |           |
| cg26884581 | 0.137308   | -217.0237 | -0.2600746 | 0.3973826 | PYGM      |
| cg25677709 | 0.5155256  | -217.0289 | -0.2259115 | 0.7414371 | NDST1     |
| cg25993152 | 0.4645914  | -217.1454 | -0.2389628 | 0.7035542 | XAGE5     |
| cg26309498 | 0.5930557  | -217.4859 | -0.2029366 | 0.7959924 | EDAR      |
| cg15075718 | 0.3729053  | -217.6643 | -0.2575175 | 0.6304227 | MFRP      |
| cg21453309 | 0.168307   | -217.7208 | -0.2653095 | 0.4336165 | FAM101A   |
| cg04273431 | 0.1297887  | -218.0439 | -0.2592797 | 0.3890684 | PRR3      |
| cg03379131 | 0.05194796 | -218.2336 | -0.2340225 | 0.2859704 | ADAM15    |
| cg15005385 | 0.3026752  | -218.3275 | -0.2666148 | 0.56929   | CCL3L1    |
| cg15670863 | 0.4150099  | -218.7974 | -0.250489  | 0.6654989 | SPACA4    |
| cg14740251 | 0.4483435  | -219.2486 | -0.2436084 | 0.6919519 | SIGLEC5   |
| cg20713492 | 0.08303054 | -219.5504 | -0.2475858 | 0.3306163 | AQP10     |
| cg24429836 | 0.1911291  | -219.6298 | -0.2687329 | 0.459862  | LDHD      |
| cg04655481 | 0.4611241  | -219.7526 | -0.2408691 | 0.7019932 | GPR21     |
| cg08459368 | 0.5915831  | -219.8641 | -0.2041849 | 0.7957681 | SCGB2A1   |



|            |           |           |            |           |               |
|------------|-----------|-----------|------------|-----------|---------------|
| cg22083047 | 0.2136135 | -220.1452 | -0.2702745 | 0.483888  | PRICKLE2      |
| cg04637372 | 0.3392813 | -220.4774 | -0.2637782 | 0.6030594 | FLJ32784      |
| cg27117399 | 0.3298076 | -220.515  | -0.2649723 | 0.5947799 | CNDP1         |
| cg23458892 | 0.3990675 | -220.6093 | -0.2543869 | 0.6534544 | SIGLEC7       |
| cg10787197 | 0.3039027 | -220.6765 | -0.2677701 | 0.5716727 | C6orf105      |
| cg05131835 | 0.3990857 | -220.7514 | -0.2544518 | 0.6535376 | GH2           |
| cg23131950 | 0.4875756 | -221.0504 | -0.2348842 | 0.7224598 | AP2S1         |
| cg06946880 | 0.4768234 | -221.2125 | -0.2376667 | 0.7144901 | ATP6V1B1      |
| cg01474260 | 0.3340552 | -221.4586 | -0.2649415 | 0.5989967 | CESK1         |
| cg19382175 | 0.4938801 | -221.5968 | -0.2334663 | 0.7273464 | PDE6A         |
| cg24888049 | 0.1877903 | -222.2455 | -0.2701282 | 0.4579185 | FES           |
| cg21958034 | 0.5595706 | -222.5708 | -0.215165  | 0.7747356 | MST1          |
| cg19787037 | 0.2779873 | -222.5987 | -0.2707682 | 0.5487555 | SPAG11        |
| cg21038703 | 0.4031397 | -222.6806 | -0.2545741 | 0.6577138 | ASB16         |
| cg23173910 | 0.5481748 | -222.9668 | -0.2187489 | 0.7669237 | ACTG2         |
| cg19154438 | 0.5581197 | -223.1932 | -0.2158246 | 0.7739443 | CKM           |
| cg09528351 | 0.445501  | -223.3235 | -0.2459976 | 0.6914986 | PIK3R5        |
| cg15447486 | 0.4591606 | -223.4468 | -0.2428809 | 0.7020414 | GPR109B       |
| cg24506604 | 0.4648921 | -223.6649 | -0.2415971 | 0.7064892 | LOC14450<br>1 |
| cg12593411 | 0.3676518 | -223.7839 | -0.2613273 | 0.6289791 | ANGPTL6       |
| cg22937320 | 0.466188  | -223.7983 | -0.2413401 | 0.7075281 | C9orf138      |
| cg20485165 | 0.3904828 | -224.3002 | -0.2576758 | 0.6481587 | WFDC12        |
| cg10414946 | 0.3696597 | -224.4028 | -0.2612997 | 0.6309593 | MS4A2         |
| cg05500074 | 0.4653886 | -224.4392 | -0.2417941 | 0.7071827 | TSKS          |
| cg10586756 | 0.4313199 | -224.5983 | -0.2496853 | 0.6810052 | NUP93         |
| cg21168884 | 0.5250574 | -224.9319 | -0.226209  | 0.7512664 | C6orf122      |
| cg13320683 | 0.4072012 | -225.3524 | -0.254996  | 0.6621972 | RHOBTB1       |
| cg25214366 | 0.5405068 | -225.4592 | -0.221909  | 0.7624158 | DEFB103A      |
| cg26093687 | 0.5537579 | -225.705  | -0.2180185 | 0.7717764 | EIF3S2        |
| cg14036856 | 0.2908895 | -225.9438 | -0.2716942 | 0.5625836 | MGC5242<br>3  |
| cg27496506 | 0.5411245 | -226.3328 | -0.2220322 | 0.7631567 | TGM5          |
| cg22189286 | 0.4430644 | -226.4991 | -0.2478884 | 0.6909527 | HSPB8         |
| cg27291231 | 0.4476483 | -227.2517 | -0.2471504 | 0.6947987 | SSNA1         |
| cg05873268 | 0.4942114 | -227.2649 | -0.2355766 | 0.7297881 | TPSAB1        |
| cg22585988 | 0.4367001 | -227.7524 | -0.2498461 | 0.6865462 | PVRL4         |
| cg13552869 | 0.1316639 | -227.7524 | -0.266225  | 0.3978889 | SEZ6L2        |
| cg24910675 | 0.1454349 | -227.7589 | -0.2686762 | 0.4141111 | ENG           |
| cg03087937 | 0.436597  | -228.0901 | -0.2500168 | 0.6866138 | MUC15         |
| cg11161873 | 0.2607329 | -228.2174 | -0.274769  | 0.535502  | FLJ39575      |
| cg10464775 | 0.4168305 | -228.638  | -0.2545056 | 0.6713361 | LAMP1         |
| cg12943082 | 0.5133103 | -229.1105 | -0.2310544 | 0.7443646 | CCL26         |
| cg05822532 | 0.2654341 | -229.1902 | -0.2750891 | 0.5405232 | ELN           |
| cg21755709 | 0.2017805 | -229.1981 | -0.2752905 | 0.477071  | C21orf124     |

|            |            |           |            |           |               |
|------------|------------|-----------|------------|-----------|---------------|
| cg27214365 | 0.5310996  | -229.3187 | -0.2260408 | 0.7571404 | GYPB          |
| cg24628744 | 0.1358298  | -229.5988 | -0.268242  | 0.4040718 | H2AFY         |
| cg19717326 | 0.173824   | -229.616  | -0.2735294 | 0.4473534 | MYADM         |
| cg03044435 | 0.5426577  | -229.775  | -0.2227785 | 0.7654362 | FLJ35816      |
| cg06489008 | 0.2785572  | -229.9212 | -0.2747328 | 0.55329   | CST11         |
| cg25177139 | 0.583678   | -230.1203 | -0.2100533 | 0.7937313 | SLC10A6       |
| cg02658251 | 0.387164   | -230.6828 | -0.2612046 | 0.6483686 | DEFB4         |
| cg03548857 | 0.1855687  | -231.2609 | -0.2755499 | 0.4611185 | FFAR2         |
| cg19292712 | 0.4926519  | -231.4671 | -0.2375874 | 0.7302393 | SPAM1         |
| cg19226099 | 0.2776383  | -231.5848 | -0.2756765 | 0.5533149 | MC3R          |
| cg05922591 | 0.6044611  | -231.6551 | -0.2036161 | 0.8080772 | LILRB4        |
| cg21402035 | 0.3317835  | -231.7938 | -0.2704201 | 0.6022036 | GALR3         |
| cg27566805 | 0.2123811  | -232.8712 | -0.2778573 | 0.4902384 | USH2A         |
| cg00689010 | 0.3931876  | -233.0197 | -0.2611351 | 0.6543227 | NCSTN         |
| cg23413307 | 0.3805593  | -233.2938 | -0.2635864 | 0.6441457 | LCE1F         |
| cg09841009 | 0.5244843  | -233.4728 | -0.2294388 | 0.7539231 | GYPA          |
| cg01668126 | 0.434213   | -233.4852 | -0.2528153 | 0.6870282 | MSR1          |
| cg14015044 | 0.04666576 | -233.7196 | -0.2430692 | 0.289735  | TNFRSF10<br>C |
| cg26415633 | 0.1901024  | -233.9493 | -0.2775136 | 0.4676159 | KLK1          |
| cg04337944 | 0.2005767  | -234.0101 | -0.2781224 | 0.4786991 | FBLN1         |
| cg23471482 | 0.5722874  | -234.1302 | -0.2150213 | 0.7873088 | CCL22         |
| cg22988566 | 0.6061218  | -235.1902 | -0.2041106 | 0.8102324 | WFDC10B       |
| cg26705561 | 0.2639273  | -235.364  | -0.2785311 | 0.5424584 | SEC31L2       |
| cg24693053 | 0.191743   | -235.7045 | -0.2786599 | 0.4704029 | MFSD7         |
| cg25101056 | 0.4352384  | -236.0701 | -0.2536451 | 0.6888835 | KCNG4         |
| cg19257200 | 0.5134272  | -236.3159 | -0.2336299 | 0.7470571 | SOX10         |
| cg26264314 | 0.5165959  | -236.6322 | -0.2328376 | 0.7494335 | NALP5         |
| cg13726463 | 0.5006417  | -236.8723 | -0.2374265 | 0.7380682 | COX6A2        |
| cg07922606 | 0.2145593  | -237.1462 | -0.280397  | 0.4949563 | HIST1H3E      |
| cg00714377 | 0.1264112  | -237.1757 | -0.2714261 | 0.3978373 | SLA2          |
| cg09207718 | 0.2888857  | -237.67   | -0.2780257 | 0.5669113 | CYP1A2        |
| cg26661623 | 0.3657293  | -237.7172 | -0.2681803 | 0.6339096 | ASGR2         |
| cg22970435 | 0.09461148 | -237.9651 | -0.26424   | 0.3588514 | SPATS1        |
| cg10190509 | 0.551337   | -238.2648 | -0.2229867 | 0.7743237 | CCL16         |
| cg11939496 | 0.3946501  | -239.2211 | -0.2635749 | 0.6582251 | CD244         |
| cg06277277 | 0.2039344  | -239.7655 | -0.2816131 | 0.4855476 | NR1I3         |
| cg25882366 | 0.1138174  | -240.0411 | -0.2705898 | 0.3844072 | HOXB2         |
| cg12781568 | 0.2766865  | -240.184  | -0.2802806 | 0.556967  | WT1           |
| cg24489034 | 0.4357178  | -240.4487 | -0.2553129 | 0.6910307 | LW-1          |
| cg01550148 | 0.2660386  | -240.9611 | -0.2813925 | 0.5474311 | H2AFY         |
| cg16155702 | 0.5427942  | -241.1593 | -0.2265812 | 0.7693753 | FGF21         |
| cg04744379 | 0.5062443  | -241.5128 | -0.2375172 | 0.7437615 | KLK15         |
| cg27622610 | 0.225441   | -241.7547 | -0.2830938 | 0.5085348 | OR1G1         |
| cg03343942 | 0.2543135  | -241.8897 | -0.2824917 | 0.5368052 | SLC39A5       |

|            |            |           |            |           |           |
|------------|------------|-----------|------------|-----------|-----------|
| cg24884084 | 0.1516542  | -242.3381 | -0.2788741 | 0.4305283 | SPRR1B    |
| cg06022562 | 0.6065037  | -242.3666 | -0.2060715 | 0.8125752 | FLJ13841  |
| cg03608577 | 0.5516407  | -242.3666 | -0.2242244 | 0.7758651 | OR12D3    |
| cg07531356 | 0.3956968  | -242.5069 | -0.2647918 | 0.6604886 | INSL6     |
| cg24949488 | 0.4116188  | -242.5586 | -0.2615371 | 0.6731559 | DNTT      |
| cg00563932 | 0.4554485  | -242.7578 | -0.2515072 | 0.7069557 | PTGDS     |
| cg03752885 | 0.2416102  | -242.9764 | -0.2835379 | 0.5251481 | DAPK3     |
| cg17192247 | 0.09081265 | -243.0304 | -0.2665687 | 0.3573814 | MAPRE3    |
| cg17582777 | 0.3454308  | -243.204  | -0.2739638 | 0.6193945 | EFNA3     |
| cg06818777 | 0.09008704 | -243.3966 | -0.2666018 | 0.3566888 | CHAD      |
| cg02192965 | 0.4333533  | -243.5449 | -0.2571197 | 0.690473  | SLC3A1    |
| cg06625767 | 0.5460433  | -243.5562 | -0.2263721 | 0.7724154 | F12       |
| cg24477636 | 0.2803108  | -243.752  | -0.2818674 | 0.5621782 | OR10H1    |
| cg03712237 | 0.5628262  | -243.7593 | -0.221123  | 0.7839491 | SSX2      |
| cg17217677 | 0.3777225  | -243.8471 | -0.2688301 | 0.6465526 | SMPD3     |
| cg03169180 | 0.3517169  | -243.8959 | -0.2733151 | 0.625032  | NLGN2     |
| cg05254747 | 0.4994555  | -243.9204 | -0.240308  | 0.7397634 | SLC39A14  |
| cg17386181 | 0.4899489  | -244.0838 | -0.2430054 | 0.7329543 | MT1B      |
| cg18085517 | 0.2596492  | -244.7931 | -0.2837931 | 0.5434423 | TRPM1     |
| cg01861509 | 0.4154456  | -245.4577 | -0.2619213 | 0.6773669 | SPOCK2    |
| cg12351042 | 0.3784694  | -245.8754 | -0.2695728 | 0.6480422 | OR2B2     |
| cg13758677 | 0.511733   | -246.3703 | -0.2376461 | 0.7493791 | GAGE4     |
| cg03973663 | 0.1505944  | -246.3981 | -0.2812595 | 0.4318539 | LYN       |
| cg03291145 | 0.3737101  | -246.5437 | -0.2707407 | 0.6444508 | ARSF      |
| cg06720660 | 0.3247464  | -246.7385 | -0.278576  | 0.6033224 | RNASE6    |
| cg00436603 | 0.2634565  | -247.826  | -0.2851425 | 0.5485989 | CYP2E1    |
| cg02218324 | 0.3797856  | -247.8882 | -0.2701958 | 0.6499814 | RSHL1     |
| cg13053608 | 0.2243562  | -248.1226 | -0.286634  | 0.5109901 | LGP1      |
| cg05569220 | 0.2977181  | -248.6749 | -0.2827206 | 0.5804387 | FLJ44861  |
| cg12970084 | 0.4142967  | -248.8654 | -0.2635593 | 0.677856  | ELF3      |
| cg00350478 | 0.3251449  | -248.8892 | -0.2795337 | 0.6046786 | FRMD1     |
| cg04511534 | 0.5155445  | -249.2471 | -0.2375124 | 0.7530569 | GGT6      |
| cg11435943 | 0.2316725  | -249.9605 | -0.2875422 | 0.5192146 | SERPINB12 |
| cg01970325 | 0.2507749  | -250.428  | -0.287172  | 0.5379469 | NELF      |
| cg00895324 | 0.4502617  | -250.5968 | -0.2557999 | 0.7060616 | PCP4      |
| cg00367281 | 0.3588663  | -250.6364 | -0.2751542 | 0.6340206 | CHRN3     |
| cg02812142 | 0.3764105  | -250.695  | -0.2720386 | 0.6484491 | ACMSD     |
| cg18056600 | 0.09267846 | -250.735  | -0.2722618 | 0.3649402 | ZMYND15   |
| cg24541550 | 0.2887823  | -250.7565 | -0.2846418 | 0.5734241 | MRVI1     |
| cg17298704 | 0.5826992  | -250.9348 | -0.2167361 | 0.7994353 | CLDN18    |
| cg11750883 | 0.2731339  | -251.0671 | -0.2861431 | 0.5592771 | C1orf42   |
| cg09931793 | 0.4302919  | -251.2943 | -0.2609071 | 0.6911989 | OR2K2     |
| cg14034870 | 0.2999207  | -251.3929 | -0.2838184 | 0.5837391 | SFTPG     |
| cg18881269 | 0.3709347  | -251.6059 | -0.2734542 | 0.6443889 | LEPREL2   |
| cg14107638 | 0.4108543  | -251.6894 | -0.2654672 | 0.6763214 | MAGEA5    |

|            |            |           |            |           |          |
|------------|------------|-----------|------------|-----------|----------|
| cg00226923 | 0.5292994  | -251.7381 | -0.2342147 | 0.7635141 | FGD2     |
| cg08859675 | 0.3541074  | -252.0137 | -0.2765835 | 0.6306909 | PDE4A    |
| cg27513764 | 0.3943535  | -252.1948 | -0.2691676 | 0.6635211 | EFCAB3   |
| cg06958211 | 0.3147447  | -252.5269 | -0.2826168 | 0.5973614 | PAK6     |
| cg23873703 | 0.5523642  | -252.8643 | -0.2273394 | 0.7797037 | KCNAB1   |
| cg19033555 | 0.3020942  | -252.8643 | -0.2842948 | 0.5863889 | DEFB1    |
| cg18396533 | 0.1357731  | -252.9798 | -0.28316   | 0.4189331 | DYDC1    |
| cg09038914 | 0.5134486  | -253.0403 | -0.239427  | 0.7528756 | GFAP     |
| cg02157083 | 0.3535977  | -253.225  | -0.2772171 | 0.6308148 | APOA5    |
| cg01144251 | 0.4859082  | -253.2493 | -0.2474034 | 0.7333116 | KLK9     |
| cg03782453 | 0.1065735  | -253.6487 | -0.2778094 | 0.3843829 | FLJ90575 |
| cg20649991 | 0.4883307  | -254.164  | -0.2470469 | 0.7353776 | LILRB5   |
| cg06531741 | 0.246447   | -254.2172 | -0.2893775 | 0.5358245 | HTR3B    |
| cg06275635 | 0.2708662  | -254.3235 | -0.2879764 | 0.5588427 | PGLYRP3  |
| cg20891917 | 0.470459   | -254.3933 | -0.2520191 | 0.7224781 | IFRD1    |
| cg04705866 | 0.4319283  | -254.7893 | -0.2619016 | 0.6938299 | GZMK     |
| cg03352153 | 0.4334731  | -255.5006 | -0.261803  | 0.6952761 | GLULD1   |
| cg03544379 | 0.2017983  | -255.5011 | -0.2905215 | 0.4923198 | OR7C2    |
| cg03104936 | 0.3613836  | -255.5724 | -0.2769099 | 0.6382935 | GRB10    |
| cg18223379 | 0.2285603  | -255.7561 | -0.2907441 | 0.5193044 | BPIL3    |
| cg18473117 | 0.436765   | -255.9038 | -0.2611702 | 0.6979352 | CCDC22   |
| cg09343150 | 0.5436325  | -256.6601 | -0.2313237 | 0.7749562 | MEN1     |
| cg10894512 | 0.3553211  | -257.1682 | -0.2786576 | 0.6339787 | ACTA2    |
| cg08766149 | 0.4203504  | -257.5329 | -0.265674  | 0.6860244 | GZMB     |
| cg00819362 | 0.5363369  | -257.9166 | -0.2340246 | 0.7703615 | CLIPR-59 |
| cg06233503 | 0.2744303  | -258.1121 | -0.2895752 | 0.5640055 | KCNQ1    |
| cg00134539 | 0.4507644  | -259.6862 | -0.2590842 | 0.7098486 | UBASH3A  |
| cg00622552 | 0.09947708 | -259.7033 | -0.279939  | 0.379416  | ODF3L1   |
| cg04891836 | 0.3669757  | -259.7423 | -0.2776734 | 0.644649  | TNFSF14  |
| cg07115820 | 0.2878047  | -259.8951 | -0.2892009 | 0.5770056 | EPX      |
| cg00392257 | 0.3170984  | -260.1018 | -0.2858368 | 0.6029352 | ISG20L2  |
| cg10370591 | 0.3364127  | -260.2356 | -0.2830961 | 0.6195087 | TPO      |
| cg15782391 | 0.2778208  | -261.107  | -0.2907378 | 0.5685586 | ACPT     |
| cg00750606 | 0.2463965  | -261.4402 | -0.293089  | 0.5394855 | CDA      |
| cg15903395 | 0.3787432  | -261.6642 | -0.2762319 | 0.6549752 | FLJ25369 |
| cg10746737 | 0.4434244  | -261.8705 | -0.2617585 | 0.7051829 | HLA-DRB5 |
| cg19000186 | 0.3956558  | -262.2639 | -0.2730102 | 0.668666  | CNGA1    |
| cg10125195 | 0.4236531  | -262.4191 | -0.2667868 | 0.6904398 | LACRT    |
| cg19384697 | 0.2061875  | -262.4456 | -0.2943963 | 0.5005838 | UPK3B    |
| cg00344709 | 0.5416344  | -262.6129 | -0.2338045 | 0.7754389 | ANKRD21  |
| cg18790143 | 0.437057   | -263.2229 | -0.2638491 | 0.7009061 | OTOS     |
| cg21432842 | 0.243921   | -263.7147 | -0.2943663 | 0.5382873 | CSF3     |
| cg00209066 | 0.5819864  | -263.9484 | -0.2207322 | 0.8027186 | BRD1     |
| cg25957124 | 0.2320623  | -264.3664 | -0.2951566 | 0.5272189 | DNAH3    |
| cg22022041 | 0.5029412  | -264.4533 | -0.2463304 | 0.7492716 | CCR9     |

|            |            |           |            |           |          |
|------------|------------|-----------|------------|-----------|----------|
| cg16998872 | 0.5117315  | -264.8137 | -0.2438152 | 0.7555467 | GYPE     |
| cg15626350 | 0.1730309  | -264.9078 | -0.2944311 | 0.467462  | ESR1     |
| cg03003745 | 0.2995116  | -265.5219 | -0.2905655 | 0.590077  | UNQ473   |
| cg11070419 | 0.2531605  | -265.6757 | -0.2948528 | 0.5480133 | C4BPA    |
| cg03453449 | 0.328102   | -265.7572 | -0.286816  | 0.6149181 | USP44    |
| cg18967533 | 0.2436493  | -266.2716 | -0.2956727 | 0.539322  | KLK6     |
| cg19910382 | 0.3052712  | -266.5583 | -0.2903375 | 0.5956088 | FABP1    |
| cg16673198 | 0.3544933  | -267.0427 | -0.2830273 | 0.6375206 | CPNE4    |
| cg21505334 | 0.47451    | -267.5179 | -0.2555291 | 0.7300391 | CEACAM5  |
| cg12970081 | 0.2819273  | -268.2698 | -0.2937709 | 0.5756982 | GPR32    |
| cg01731341 | 0.5653226  | -269.2832 | -0.2279496 | 0.7932723 | FGF6     |
| cg25710140 | 0.4205144  | -269.3308 | -0.2701367 | 0.6906511 | MID1     |
| cg16504670 | 0.4400075  | -269.3445 | -0.2653506 | 0.7053581 | FLJ20186 |
| cg25982743 | 0.1429408  | -269.4642 | -0.2940742 | 0.437015  | TIMP4    |
| cg09864990 | 0.56778    | -270.0331 | -0.2273336 | 0.7951136 | GATA5    |
| cg10417559 | 0.5431135  | -270.0331 | -0.2355651 | 0.7786786 | LMO6     |
| cg13181284 | 0.6409424  | -270.4356 | -0.2008958 | 0.8418382 | KRT6B    |
| cg22228134 | 0.2865813  | -270.7859 | -0.294468  | 0.5810493 | GZMH     |
| cg25020204 | 0.2831326  | -271.1342 | -0.2949942 | 0.5781268 | DBH      |
| cg19481686 | 0.3429203  | -271.5204 | -0.2869291 | 0.6298494 | CDKN2B   |
| cg21639401 | 0.3849457  | -271.6308 | -0.278995  | 0.6639407 | FLJ31222 |
| cg04968473 | 0.2601665  | -272.3537 | -0.2976333 | 0.5577998 | CYP1A2   |
| cg07711097 | 0.3830023  | -273.1255 | -0.2799846 | 0.6629869 | GML      |
| cg04457051 | 0.3125393  | -273.253  | -0.2923735 | 0.6049128 | SCOC     |
| cg12339029 | 0.4668424  | -273.3449 | -0.2596459 | 0.7264883 | MYL1     |
| cg25659818 | 0.2789412  | -273.4499 | -0.2965012 | 0.5754424 | CCL4     |
| cg24825722 | 0.3018067  | -273.4777 | -0.2939108 | 0.5957175 | ACADVL   |
| cg11984608 | 0.5695336  | -273.5178 | -0.2277158 | 0.7972494 | CLDN16   |
| cg08555657 | 0.4925148  | -273.588  | -0.2524011 | 0.7449159 | SPRR2E   |
| cg19875656 | 0.5610448  | -273.9405 | -0.2307398 | 0.7917845 | TSP50    |
| cg24691255 | 0.6091955  | -274.5809 | -0.2138605 | 0.823056  | SERPINB2 |
| cg05446471 | 0.6350932  | -275.2408 | -0.2042929 | 0.8393861 | HDAC11   |
| cg02723372 | 0.5623582  | -275.6206 | -0.2307638 | 0.793122  | RUNX3    |
| cg18533225 | 0.4154668  | -275.8857 | -0.273789  | 0.6892558 | KLHDC7B  |
| cg25400358 | 0.2636187  | -276.168  | -0.2991863 | 0.5628049 | GPR137   |
| cg09426307 | 0.3617564  | -276.7559 | -0.2856926 | 0.647449  | SEC14L3  |
| cg17095731 | 0.3561249  | -276.8296 | -0.2867883 | 0.6429132 | LRP8     |
| cg01305625 | 0.2270165  | -276.8296 | -0.3016466 | 0.5286632 | PDLIM4   |
| cg07967308 | 0.3392382  | -277.8171 | -0.2902045 | 0.6294427 | ACP5     |
| cg01053621 | 0.2684119  | -277.8654 | -0.2995697 | 0.5679817 | APOA2    |
| cg27212977 | 0.6266514  | -278.1718 | -0.2082235 | 0.8348749 | DEFA6    |
| cg27257987 | 0.3603279  | -278.5452 | -0.286693  | 0.6470209 | PSG4     |
| cg01663968 | 0.06246698 | -278.9345 | -0.2810506 | 0.3435176 | CTSZ     |
| cg04048249 | 0.3734956  | -279.1021 | -0.2843128 | 0.6578084 | APOC3    |
| cg13126790 | 0.4015483  | -279.1077 | -0.2782461 | 0.6797944 | FLJ27255 |

|            |            |           |            |           |                |
|------------|------------|-----------|------------|-----------|----------------|
| cg01309153 | 0.6482783  | -279.6017 | -0.2002066 | 0.8484849 | SURF1          |
| cg21541083 | 0.5813487  | -279.6017 | -0.2252475 | 0.8065962 | STXBP2         |
| cg02719634 | 0.5463156  | -279.8842 | -0.2374004 | 0.783716  | SLC22A18<br>AS |
| cg07643942 | 0.2607775  | -280.2285 | -0.3013476 | 0.5621251 | LACRT          |
| cg03977657 | 0.5538131  | -280.2803 | -0.2349929 | 0.788806  | LAMB3          |
| cg15648315 | 0.4513979  | -280.9472 | -0.2664712 | 0.717869  | FLJ26443       |
| cg16016036 | 0.6208293  | -280.9578 | -0.2111141 | 0.8319434 | TPO            |
| cg16507522 | 0.5136249  | -281.3313 | -0.2484202 | 0.7620451 | SERPINA3       |
| cg18783781 | 0.5263722  | -281.4824 | -0.2444136 | 0.7707858 | MGC4399        |
| cg12022621 | 0.2476728  | -281.7932 | -0.3030664 | 0.5507392 | LAX1           |
| cg10490064 | 0.4478829  | -282.0498 | -0.2677978 | 0.7156807 | CRYBB2         |
| cg15741706 | 0.419955   | -282.4341 | -0.2751071 | 0.6950621 | CXorf48        |
| cg04567009 | 0.2929352  | -282.7332 | -0.2991729 | 0.5921081 | FCGR3B         |
| cg01255591 | 0.5978374  | -282.9227 | -0.2201717 | 0.8180091 | R3HDML         |
| cg02537838 | 0.5663452  | -283.2268 | -0.2315088 | 0.7978539 | C20orf151      |
| cg15531099 | 0.2315382  | -283.3527 | -0.304716  | 0.5362542 | LCE1D          |
| cg12113132 | 0.2434373  | -283.4819 | -0.3041513 | 0.5475886 | CCNDBP1        |
| cg22253945 | 0.5448371  | -283.6391 | -0.2389772 | 0.7838143 | GPR45          |
| cg27087809 | 0.4980678  | -284.0695 | -0.2540833 | 0.7521511 | ACSBG1         |
| cg08402568 | 0.3664     | -284.6953 | -0.2879597 | 0.6543597 | MGC3464<br>7   |
| cg07977490 | 0.4105672  | -284.8373 | -0.2782625 | 0.6888297 | C16orf45       |
| cg01484156 | 0.2451172  | -285.5057 | -0.3050075 | 0.5501247 | NCALD          |
| cg07408456 | 0.3082819  | -285.5898 | -0.2983808 | 0.6066627 | PGLYRP2        |
| cg24851490 | 0.1977015  | -285.6934 | -0.3065453 | 0.5042468 | RNASE2         |
| cg25531166 | 0.5178339  | -286.3084 | -0.2486001 | 0.766434  | CTAG1B         |
| cg15303841 | 0.3011009  | -287.0264 | -0.3000085 | 0.6011094 | RFPL1          |
| cg15842430 | 0.3326167  | -287.1727 | -0.2952414 | 0.627858  | FAM12B         |
| cg20095587 | 0.4439802  | -287.5256 | -0.2707281 | 0.7147083 | TREM2          |
| cg00042156 | 0.2935182  | -288.7946 | -0.3017735 | 0.5952918 | MGC1629<br>1   |
| cg22194129 | 0.2862951  | -289.3222 | -0.3029032 | 0.5891984 | CLEC4C         |
| cg01772980 | 0.3267902  | -289.53   | -0.2971807 | 0.6239709 | SCGB1D1        |
| cg16358738 | 0.4564345  | -289.6003 | -0.2680157 | 0.7244502 | AGXT           |
| cg15096123 | 0.6544133  | -289.768  | -0.2000601 | 0.8544734 | KLK4           |
| cg12069042 | 0.3952163  | -290.0172 | -0.2837692 | 0.6789856 | PLXNB1         |
| cg24901474 | 0.2441151  | -290.6381 | -0.3075053 | 0.5516204 | RGS5           |
| cg09458237 | 0.4147226  | -291.2664 | -0.2795594 | 0.694282  | HSPA12B        |
| cg10408410 | 0.4372455  | -291.4086 | -0.2738394 | 0.711085  | RLBP1          |
| cg23881725 | 0.1253204  | -291.5779 | -0.3043634 | 0.4296838 | DLEC1          |
| cg14934821 | 0.5965958  | -291.6654 | -0.2228435 | 0.8194393 | GPSM1          |
| cg09300114 | 0.1581555  | -292.5821 | -0.3085765 | 0.466732  | SLC16A5        |
| cg24852661 | 0.09223668 | -292.6131 | -0.2985466 | 0.3907833 | GOLPH2         |
| cg12850636 | 0.4419065  | -292.801  | -0.2730698 | 0.7149763 | TJP3           |

|            |            |           |            |           |           |
|------------|------------|-----------|------------|-----------|-----------|
| cg01469547 | 0.5813481  | -292.8955 | -0.2287482 | 0.8100963 | OR5P3     |
| cg12775613 | 0.331373   | -292.9869 | -0.2978351 | 0.6292081 | HTR1F     |
| cg14662756 | 0.3503369  | -293.0247 | -0.294401  | 0.6447378 | NPFF      |
| cg16545105 | 0.3656366  | -293.184  | -0.2914249 | 0.6570615 | CRHBP     |
| cg19111262 | 0.2137915  | -293.2231 | -0.3101895 | 0.5239811 | IGSF9     |
| cg12332316 | 0.6302835  | -293.3694 | -0.2104363 | 0.8407198 | F12       |
| cg13960126 | 0.3457187  | -293.5995 | -0.2955089 | 0.6412276 | CRB3      |
| cg25889160 | 0.6341406  | -293.9659 | -0.2090622 | 0.8432028 | SERPINA5  |
| cg15140807 | 0.4784398  | -294.286  | -0.2632067 | 0.7416465 | FLJ31222  |
| cg24743310 | 0.6419602  | -294.4726 | -0.2060869 | 0.8480471 | FLJ31196  |
| cg27020690 | 0.06216067 | -294.5948 | -0.2910332 | 0.3531938 | TERC      |
| cg02324920 | 0.2142664  | -294.6975 | -0.3109075 | 0.5251739 | NEURL     |
| cg04962134 | 0.295958   | -294.8112 | -0.304083  | 0.600041  | TRIM51    |
| cg16051685 | 0.4687419  | -295.6075 | -0.2664826 | 0.7352245 | TRIM63    |
| cg00626119 | 0.2256173  | -296.0958 | -0.3111691 | 0.5367865 | NTRK1     |
| cg01325515 | 0.550091   | -296.317  | -0.2407348 | 0.7908258 | CTAG2     |
| cg05670596 | 0.1762175  | -296.3468 | -0.3115986 | 0.4878161 | CCRL2     |
| cg22039846 | 0.6537306  | -296.3829 | -0.2017903 | 0.8555208 | KIR2DL1   |
| cg10052840 | 0.1832747  | -296.4127 | -0.3118504 | 0.4951251 | SEMA6B    |
| cg17926869 | 0.5206151  | -296.4702 | -0.2507026 | 0.7713177 | LOC115098 |
| cg22220722 | 0.5238435  | -296.5362 | -0.2496639 | 0.7735075 | PLA2G2A   |
| cg24331162 | 0.4392722  | -296.9139 | -0.2751912 | 0.7144635 | SYT8      |
| cg06001166 | 0.6002716  | -297.0007 | -0.2228105 | 0.8230821 | RPL3L     |
| cg20011352 | 0.06177698 | -297.3228 | -0.2926457 | 0.3544226 | GPR124    |
| cg01982597 | 0.3963978  | -297.3707 | -0.2862092 | 0.682607  | PGBD3     |
| cg10779183 | 0.4775974  | -297.8295 | -0.2645836 | 0.7421809 | ELA3A     |
| cg09467501 | 0.07486033 | -298.0313 | -0.2972528 | 0.3721131 | PYY       |
| cg25552889 | 0.5505059  | -298.372  | -0.2411602 | 0.7916662 | C3orf40   |
| cg26353877 | 0.4935323  | -298.8527 | -0.2600455 | 0.7535778 | APCS      |
| cg26581729 | 0.141939   | -299.0525 | -0.3106883 | 0.4526273 | NPDC1     |
| cg17827767 | 0.587439   | -300.142  | -0.2283686 | 0.8158076 | LRRC21    |
| cg24908058 | 0.6278279  | -300.2759 | -0.2129888 | 0.8408167 | CGB5      |
| cg02833725 | 0.3561583  | -300.6501 | -0.2962384 | 0.6523967 | ISG20L2   |
| cg06303238 | 0.3556225  | -301.3529 | -0.296611  | 0.6522335 | SALL4     |
| cg19465374 | 0.5237271  | -301.6609 | -0.2511573 | 0.7748845 | AZGP1     |
| cg05636175 | 0.1206589  | -301.8205 | -0.3094908 | 0.4301497 | TNFRSF10C |
| cg02423618 | 0.2826235  | -301.945  | -0.308893  | 0.5915165 | SPATA8    |
| cg11346450 | 0.4539747  | -302.0488 | -0.2728043 | 0.726779  | UGT1A3    |
| cg24607398 | 0.2069951  | -302.3382 | -0.3148242 | 0.5218193 | MLH1      |
| cg12951282 | 0.3042613  | -302.5775 | -0.3061835 | 0.6104448 | ASGR2     |
| cg10409560 | 0.5097134  | -302.6913 | -0.2560535 | 0.7657669 | FLJ23657  |
| cg27394486 | 0.5625953  | -303.3608 | -0.238226  | 0.8008213 | C15orf2   |
| cg15480475 | 0.4463923  | -303.4216 | -0.2753881 | 0.7217804 | TUB       |

|            |           |           |            |           |          |
|------------|-----------|-----------|------------|-----------|----------|
| cg24697329 | 0.4712322 | -303.8142 | -0.2683475 | 0.7395797 | ARHGEF4  |
| cg04488758 | 0.3661189 | -304.0098 | -0.2954489 | 0.6615677 | USP44    |
| cg08603768 | 0.3590076 | -304.3621 | -0.2970741 | 0.6560817 | WNT8A    |
| cg00075967 | 0.4368866 | -304.5222 | -0.2783756 | 0.7152622 | STRA6    |
| cg24816866 | 0.4815656 | -306.1877 | -0.2659447 | 0.7475104 | PARK2    |
| cg15542496 | 0.4541747 | -306.2224 | -0.2740807 | 0.7282554 | PIP      |
| cg18204685 | 0.396766  | -306.3748 | -0.289323  | 0.686089  | BTD      |
| cg02717866 | 0.3518708 | -307.1404 | -0.2995688 | 0.6514395 | FLJ32771 |
| cg03993463 | 0.6286557 | -307.5837 | -0.2143007 | 0.8429564 | KCNJ15   |
| cg00594952 | 0.2500748 | -307.653  | -0.3148771 | 0.564952  | RIMS3    |
| cg05093686 | 0.1596323 | -308.3028 | -0.3170086 | 0.4766409 | MAB21L1  |
| cg07484827 | 0.1828693 | -308.3852 | -0.3178844 | 0.5007538 | CHRNA10  |
| cg09037813 | 0.360417  | -309.1925 | -0.2985704 | 0.6589874 | LRRFIP1  |
| cg03609102 | 0.2561865 | -309.3185 | -0.3150454 | 0.5712318 | MUC5B    |
| cg17788013 | 0.4105215 | -309.5193 | -0.2869932 | 0.6975147 | SPINK5   |
| cg10071275 | 0.2659039 | -310.7282 | -0.3146366 | 0.5805405 | MYT1     |
| cg09448880 | 0.3346491 | -310.8279 | -0.3043243 | 0.6389734 | PGLYRP3  |
| cg02187357 | 0.3296021 | -311.0429 | -0.3053423 | 0.6349444 | TBC1D22B |
| cg14911395 | 0.152816  | -311.249  | -0.3180929 | 0.4709089 | SEMA3B   |
| cg09546307 | 0.3786727 | -312.4618 | -0.2957239 | 0.6743965 | CLEC4D   |
| cg07297178 | 0.4961194 | -312.68   | -0.263298  | 0.7594174 | CEACAM7  |
| cg01459162 | 0.5414894 | -313.1819 | -0.2482433 | 0.7897327 | PADI3    |
| cg16272420 | 0.4405603 | -313.1932 | -0.2801511 | 0.7207115 | PNLIPRP2 |
| cg15210427 | 0.1945725 | -313.2207 | -0.3202599 | 0.5148324 | CST9L    |
| cg01074640 | 0.3432064 | -313.7365 | -0.3037807 | 0.6469871 | IFNA17   |
|            |           |           |            |           | MGC3529  |
| cg25072962 | 0.3162956 | -314.5058 | -0.3090386 | 0.6253342 | 5        |
| cg19368582 | 0.3428667 | -314.5862 | -0.3041656 | 0.6470323 | MMRN2    |
| cg19812619 | 0.6207693 | -314.9917 | -0.2190678 | 0.8398371 | ITGB7    |
| cg22510822 | 0.3391191 | -315.1014 | -0.3050966 | 0.6442158 | OR1E2    |
| cg13271951 | 0.2041817 | -315.2852 | -0.3210627 | 0.5252445 | FAM57B   |
| cg23278885 | 0.4181079 | -315.3753 | -0.2869802 | 0.7050881 | TGM6     |
| cg20576002 | 0.2959459 | -315.5447 | -0.3127294 | 0.6086753 | FAM112B  |
| cg04810997 | 0.3733408 | -315.6746 | -0.2980949 | 0.6714357 | TAS2R60  |
| cg02882813 | 0.5031943 | -317.0327 | -0.26225   | 0.7654443 | CST5     |
| cg24919884 | 0.3553892 | -317.2199 | -0.3025788 | 0.657968  | ARHGEF16 |
| cg00463202 | 0.5095125 | -317.9836 | -0.260433  | 0.7699456 | ADPRHL1  |
| cg16480209 | 0.6486808 | -318.3035 | -0.2084654 | 0.8571462 | CNGB1    |
| cg06277657 | 0.1572346 | -319.036  | -0.3223293 | 0.4795639 | DGKI     |
| cg13180098 | 0.3342773 | -319.556  | -0.3077018 | 0.641979  | RHO      |
| cg08996986 | 0.3802059 | -319.7308 | -0.2979205 | 0.6781263 | EPS8L1   |
| cg01726767 | 0.3055167 | -320.0232 | -0.3130054 | 0.6185221 | LALBA    |
| cg07597976 | 0.266815  | -320.0261 | -0.3184793 | 0.5852943 | CD19     |
| cg07412254 | 0.3210226 | -320.3366 | -0.3104755 | 0.631498  | FLJ14816 |
| cg07525077 | 0.2536817 | -320.7127 | -0.3202254 | 0.5739071 | RNASE3   |



|            |            |           |            |           |          |
|------------|------------|-----------|------------|-----------|----------|
| cg10127415 | 0.2024967  | -320.9348 | -0.3237528 | 0.5262495 | MAGEB6   |
| cg07446846 | 0.5388784  | -320.9484 | -0.251195  | 0.7900734 | SLC6A8   |
| cg26946769 | 0.5249795  | -321.043  | -0.256053  | 0.7810324 | MAPK4    |
| cg21495715 | 0.4291016  | -321.4447 | -0.2859782 | 0.7150798 | SLC5A10  |
| cg02981703 | 0.5698641  | -321.7208 | -0.2401904 | 0.8100545 | CA6      |
| cg01894895 | 0.5199026  | -323.3341 | -0.2584007 | 0.7783033 | ANXA1    |
|            |            |           |            |           | LOC34289 |
| cg19917856 | 0.1876958  | -323.3508 | -0.3251599 | 0.5128558 | 7        |
| cg24355048 | 0.3267258  | -323.701  | -0.3107148 | 0.6374406 | CTSG     |
| cg14366490 | 0.3267543  | -323.9493 | -0.3108039 | 0.6375582 | TXNL6    |
| cg02351381 | 0.1403574  | -324.2376 | -0.3238371 | 0.4641945 | C12orf34 |
| cg08972170 | 0.232967   | -324.4896 | -0.3237384 | 0.5567054 | Ells1    |
| cg16175725 | 0.5548052  | -324.6436 | -0.2464404 | 0.8012456 | TCF1     |
| cg06539449 | 0.4615954  | -325.1357 | -0.2777038 | 0.7392992 | CCND1    |
| cg07339138 | 0.2508708  | -325.2944 | -0.3224824 | 0.5733532 | CCDC13   |
| cg15422147 | 0.3910492  | -325.8373 | -0.2974044 | 0.6884536 | SERPINB5 |
| cg09508556 | 0.6528663  | -326.4757 | -0.2083774 | 0.8612437 | PSORS1C2 |
| cg17687962 | 0.4578489  | -327.1526 | -0.2794293 | 0.7372782 | KLK3     |
| cg05912121 | 0.3532359  | -327.5354 | -0.3067664 | 0.6600023 | TH       |
| cg23829949 | 0.2587149  | -327.8643 | -0.3227086 | 0.5814235 | ZNF238   |
| cg09542291 | 0.5045001  | -328.2713 | -0.2649306 | 0.7694307 | SMCP     |
| cg27157038 | 0.4754021  | -329.0511 | -0.2745782 | 0.7499803 | DNTT     |
| cg26918728 | 0.6052164  | -329.3563 | -0.2283987 | 0.8336151 | SEMA3B   |
| cg25013053 | 0.401154   | -329.4645 | -0.2960388 | 0.6971928 | UNC45B   |
| cg10248727 | 0.5675938  | -329.9757 | -0.2430153 | 0.810609  | LCN1     |
| cg13694749 | 0.3838293  | -330.463  | -0.3007281 | 0.6845574 | SCN4A    |
|            |            |           |            |           | MGC2712  |
| cg20189782 | 0.4177759  | -330.5232 | -0.291964  | 0.7097399 | 1        |
| cg14179628 | 0.3252831  | -330.8939 | -0.3136697 | 0.6389529 | TCEAL7   |
| cg04574507 | 0.3375845  | -331.1469 | -0.311342  | 0.6489264 | CD1B     |
| cg16986846 | 0.2694562  | -331.8031 | -0.3230155 | 0.5924717 | SCGB2A1  |
| cg00941549 | 0.3613079  | -332.6506 | -0.3067752 | 0.6680831 | AKAP4    |
| cg04431776 | 0.5529564  | -333.0763 | -0.2491806 | 0.802137  | GAGE2    |
| cg10604646 | 0.2080375  | -333.1383 | -0.3291107 | 0.5371482 | RGS5     |
| cg08093398 | 0.3401287  | -334.0027 | -0.3118396 | 0.6519684 | PSF1     |
|            |            |           |            |           | TNFRSF10 |
| cg27090216 | 0.04763377 | -334.4768 | -0.3104566 | 0.3580904 | C        |
| cg23260026 | 0.175757   | -334.8237 | -0.330569  | 0.506326  | FSTL3    |
| cg10883352 | 0.3656414  | -336.0956 | -0.3069619 | 0.6726032 |          |
| cg27418851 | 0.348381   | -336.0956 | -0.3108295 | 0.6592104 | MBL2     |
| cg19717150 | 0.358658   | -336.3095 | -0.3086373 | 0.6672953 | HNF4A    |
| cg20551517 | 0.4861671  | -336.6554 | -0.2732625 | 0.7594296 | GIP      |
| cg12061127 | 0.3603942  | -336.6672 | -0.3083705 | 0.6687647 | WFDC9    |
| cg10275770 | 0.1127888  | -336.7608 | -0.327266  | 0.4400549 | ICAM2    |
| cg25372195 | 0.346233   | -337.6609 | -0.3118493 | 0.6580823 | DCD      |

|            |           |           |            |           |           |
|------------|-----------|-----------|------------|-----------|-----------|
| cg21970438 | 0.4830888 | -337.694  | -0.2745528 | 0.7576416 | TTL2      |
| cg06437862 | 0.4866819 | -337.9285 | -0.2734486 | 0.7601305 | TUBA2     |
|            |           |           |            |           | LOC12225  |
| cg21624282 | 0.5447901 | -338.3134 | -0.2534465 | 0.7982366 | 8         |
| cg08420900 | 0.6433162 | -338.5591 | -0.2147718 | 0.858088  | LW-1      |
| cg15983538 | 0.4651572 | -339.1519 | -0.2806718 | 0.745829  | SEMA4A    |
| cg18920397 | 0.4040957 | -339.8966 | -0.2986136 | 0.7027093 | LY9       |
| cg03458191 | 0.4701371 | -340.3138 | -0.2794302 | 0.7495673 | SAA1      |
| cg03468463 | 0.3293321 | -340.7763 | -0.3164691 | 0.6458012 | SERPINB12 |
| cg20488657 | 0.3881912 | -340.98   | -0.3031063 | 0.6912975 | TFF3      |
| cg20311730 | 0.3072675 | -341.1833 | -0.3208069 | 0.6280743 | NALP10    |
| cg07651914 | 0.2432898 | -341.2409 | -0.329929  | 0.5732188 | CLDN15    |
| cg19304352 | 0.5345432 | -341.8284 | -0.258023  | 0.7925661 | DEFA4     |
| cg14284171 | 0.5854444 | -341.9161 | -0.2389464 | 0.8243908 | SSX4      |
| cg07441143 | 0.3854205 | -342.202  | -0.304215  | 0.6896355 | SLURP1    |
| cg25477904 | 0.5583174 | -343.0284 | -0.249577  | 0.8078945 | PSG1      |
| cg06090864 | 0.6599521 | -343.0347 | -0.2085464 | 0.8684985 | FFAR1     |
| cg27442349 | 0.3126822 | -343.0479 | -0.3205225 | 0.6332046 | NFKBIB    |
| cg02130905 | 0.2806203 | -343.7266 | -0.326171  | 0.6067913 | STMN4     |
| cg01568736 | 0.4541648 | -344.1411 | -0.2855081 | 0.7396729 | SERPINB7  |
| cg22218909 | 0.6514704 | -344.2061 | -0.2124104 | 0.8638808 | DEFA3     |
| cg05547500 | 0.592259  | -344.668  | -0.2368767 | 0.8291358 | TXNDC2    |
| cg15996947 | 0.2924846 | -346.0182 | -0.32516   | 0.6176445 | L2HGDH    |
| cg15627025 | 0.6368562 | -347.1357 | -0.2191649 | 0.8560211 | KIR3DL1   |
| cg24750391 | 0.1530921 | -347.203  | -0.3359441 | 0.4890362 | PON3      |
| cg18063149 | 0.3839908 | -347.4694 | -0.30627   | 0.6902608 | FMO3      |
| cg05215575 | 0.2312278 | -347.802  | -0.3338161 | 0.5650438 | FLJ25410  |
| cg26813458 | 0.6523358 | -347.8446 | -0.2127216 | 0.8650575 | CEACAM6   |
| cg08448751 | 0.3454146 | -349.2083 | -0.3160277 | 0.6614423 | SEMA3G    |
| cg17894008 | 0.5739967 | -349.2411 | -0.2450243 | 0.819021  | NACAL     |
| cg17778867 | 0.3647156 | -349.389  | -0.3116541 | 0.6763697 | KRTAP10-8 |
| cg03931808 | 0.6866927 | -352.7258 | -0.2003426 | 0.8870353 | RLN3      |
| cg00269932 | 0.6904089 | -352.7258 | -0.2062206 | 0.8966295 | LAIR2     |
| cg02910574 | 0.689382  | -352.7258 | -0.2064093 | 0.8957913 | PCOLN3    |
| cg01119135 | 0.6717091 | -352.7258 | -0.2069625 | 0.8786716 | C1orf116  |
| cg20822628 | 0.7206532 | -352.7258 | -0.2089576 | 0.9296108 | GATA5     |
| cg21399079 | 0.6634654 | -352.7258 | -0.2100514 | 0.8735169 | GPR45     |
| cg08742106 | 0.673506  | -352.7258 | -0.2109548 | 0.8844607 | USP6      |
| cg25087423 | 0.6960046 | -352.7258 | -0.2135956 | 0.9096003 | BLR1      |
| cg21825364 | 0.6962662 | -352.7258 | -0.2137297 | 0.9099959 | VCY       |
| cg13696012 | 0.6619815 | -352.7258 | -0.2142497 | 0.8762311 | BPIL1     |
| cg25514503 | 0.6716544 | -352.7258 | -0.2181028 | 0.8897572 | PER3      |
| cg20676303 | 0.6611347 | -352.7258 | -0.2181656 | 0.8793003 | GAGE7B    |
| cg18565510 | 0.6920105 | -352.7258 | -0.2190725 | 0.911083  | CENTB5    |
| cg21003606 | 0.6634859 | -352.7258 | -0.2265315 | 0.8900174 | CALN1     |

|            |           |           |            |           |          |
|------------|-----------|-----------|------------|-----------|----------|
| cg14519000 | 0.6486569 | -352.7258 | -0.2280897 | 0.8767466 | GATA5    |
| cg18231267 | 0.6558737 | -352.7258 | -0.2281056 | 0.8839793 | RUNX3    |
| cg03557698 | 0.6397599 | -352.7258 | -0.2294526 | 0.8692125 | C1orf177 |
| cg09837648 | 0.6361181 | -352.7258 | -0.2304895 | 0.8666076 | PLXNB1   |
| cg04254916 | 0.6310069 | -352.7258 | -0.2310483 | 0.8620552 | KRT5     |
| cg15379858 | 0.657989  | -352.7258 | -0.2312474 | 0.8892364 | ChGn     |
| cg07339327 | 0.6726423 | -352.7258 | -0.2312915 | 0.9039338 | CCND1    |
| cg06325687 | 0.6706373 | -352.7258 | -0.2318333 | 0.9024706 | OPN1MW   |
| cg05248781 | 0.6090333 | -352.7258 | -0.2322478 | 0.8412812 | LCE5A    |
| cg06985415 | 0.6139731 | -352.7258 | -0.2330909 | 0.847064  | C10orf39 |
| cg08124722 | 0.6074584 | -352.7258 | -0.2335812 | 0.8410395 | CCL7     |
| cg09283007 | 0.6699133 | -352.7258 | -0.2344526 | 0.9043659 | FAM47B   |
| cg18809535 | 0.6102067 | -352.7258 | -0.2347228 | 0.8449295 | LDHAL6B  |
| cg10938286 | 0.6095831 | -352.7258 | -0.2353019 | 0.844885  | CST2     |
| cg20543571 | 0.6037781 | -352.7258 | -0.2371295 | 0.8409076 | C15orf43 |
| cg12040555 | 0.6535989 | -352.7258 | -0.238906  | 0.8925049 | MGMT     |
| cg18389810 | 0.6020694 | -352.7258 | -0.2393957 | 0.8414651 | C14orf8  |
| cg12266049 | 0.5806788 | -352.7258 | -0.2432015 | 0.8238803 | CCND1    |
| cg13439299 | 0.5792388 | -352.7258 | -0.2455125 | 0.8247514 | DNAJC5G  |
| cg03782727 | 0.6093279 | -352.7258 | -0.2458876 | 0.8552155 | FFAR1    |
| cg00152644 | 0.5714646 | -352.7258 | -0.2497616 | 0.8212262 | SPRR2E   |
| cg19971655 | 0.6447574 | -352.7258 | -0.2501604 | 0.8949178 | BSND     |
| cg00601486 | 0.6407053 | -352.7258 | -0.2520304 | 0.8927357 | H1T2     |
|            |           |           |            |           | LOC28436 |
| cg21277505 | 0.576471  | -352.7258 | -0.2526597 | 0.8291306 | 1        |
| cg08634024 | 0.5632554 | -352.7258 | -0.2552119 | 0.8184674 | OR2F1    |
| cg16964535 | 0.6523905 | -352.7258 | -0.2571236 | 0.9095141 | DNAJC5G  |
| cg05564657 | 0.6216125 | -352.7258 | -0.2585815 | 0.880194  | AADAC    |
| cg14297029 | 0.5826994 | -352.7258 | -0.2590175 | 0.8417169 | SSTR3    |
| cg07123548 | 0.5566222 | -352.7258 | -0.260441  | 0.8170632 | HIPK4    |
|            |           |           |            |           | SERPINA1 |
| cg22013966 | 0.5803393 | -352.7258 | -0.2606457 | 0.8409851 | 3        |
| cg22627427 | 0.5840246 | -352.7258 | -0.2611043 | 0.8451289 | C11orf9  |
| cg14162076 | 0.5685815 | -352.7258 | -0.2611719 | 0.8297534 | CLEC4D   |
| cg08495878 | 0.6031184 | -352.7258 | -0.2614333 | 0.8645517 | SERPINA4 |
| cg08471713 | 0.5734982 | -352.7258 | -0.2617574 | 0.8352556 | MEOX1    |
| cg11830061 | 0.6532003 | -352.7258 | -0.2625183 | 0.9157187 | INSL6    |
| cg00727947 | 0.6085969 | -352.7258 | -0.2644539 | 0.8730508 | LILRA5   |
| cg18521925 | 0.6290919 | -352.7258 | -0.2653196 | 0.8944114 | SLC22A16 |
| cg11015241 | 0.5952066 | -352.7258 | -0.2658082 | 0.8610147 | ATP10A   |
| cg15538820 | 0.6493569 | -352.7258 | -0.2671272 | 0.9164841 | OBP2B    |
|            |           |           |            |           | LOC16193 |
| cg07595943 | 0.6490885 | -352.7258 | -0.267704  | 0.9167925 | 1        |
| cg09948350 | 0.5271527 | -352.7258 | -0.2679555 | 0.7951082 | FLJ25084 |
| cg20416179 | 0.5195642 | -352.7258 | -0.271061  | 0.7906252 | C6orf71  |

|            |           |           |            |           |           |
|------------|-----------|-----------|------------|-----------|-----------|
| cg23749046 | 0.5160941 | -352.7258 | -0.2721844 | 0.7882785 | GPR61     |
| cg04450876 | 0.511929  | -352.7258 | -0.2726637 | 0.7845926 | FAM112B   |
| cg08728865 | 0.5176678 | -352.7258 | -0.2739434 | 0.7916111 | NALP7     |
| cg09736922 | 0.516545  | -352.7258 | -0.2745708 | 0.7911158 | THPO      |
| cg25915982 | 0.5001695 | -352.7258 | -0.2756966 | 0.7758661 | GRB10     |
| cg11884243 | 0.5169803 | -352.7258 | -0.2761499 | 0.7931302 | FCN2      |
| cg05700681 | 0.514067  | -352.7258 | -0.2766355 | 0.7907025 | CCL22     |
| cg03534410 | 0.5837216 | -352.7258 | -0.2779413 | 0.8616629 | TMEM40    |
| cg13608094 | 0.5830495 | -352.7258 | -0.2810799 | 0.8641294 | CCND1     |
| cg17240454 | 0.5186989 | -352.7258 | -0.2812625 | 0.7999614 | SPDEF     |
| cg02601403 | 0.4871154 | -352.7258 | -0.2822627 | 0.7693781 | TBC1D3C   |
| cg00520135 | 0.5723745 | -352.7258 | -0.2831442 | 0.8555187 | TPM1      |
| cg21450627 | 0.5313782 | -352.7258 | -0.2842805 | 0.8156587 | PSD4      |
| cg27341860 | 0.6071019 | -352.7258 | -0.2842892 | 0.891391  | OR2L13    |
| cg25203980 | 0.5247045 | -352.7258 | -0.285175  | 0.8098795 | CENTB5    |
| cg14150666 | 0.5499311 | -352.7258 | -0.2854988 | 0.8354299 | IL8RB     |
| cg11113534 | 0.5701099 | -352.7258 | -0.2858634 | 0.8559733 | C20orf70  |
| cg11599505 | 0.4785994 | -352.7258 | -0.2864289 | 0.7650282 | C20orf102 |
| cg04719766 | 0.4963696 | -352.7258 | -0.2875593 | 0.7839289 | KCNQ1     |
| cg07126559 | 0.4705005 | -352.7258 | -0.2888094 | 0.7593099 | SGCG      |
| cg22294577 | 0.5155568 | -352.7258 | -0.2888189 | 0.8043756 | SLC26A3   |
| cg23753610 | 0.6408595 | -352.7258 | -0.2893309 | 0.9301904 | DNAHL1    |
| cg18129786 | 0.5201986 | -352.7258 | -0.2896685 | 0.8098671 | ZNF445    |
| cg00644033 | 0.6276304 | -352.7258 | -0.289936  | 0.9175664 | MUC3B     |
| cg24824840 | 0.4996942 | -352.7258 | -0.2904148 | 0.790109  | SHANK1    |
| cg14287742 | 0.45927   | -352.7258 | -0.2905264 | 0.7497964 | BLZF1     |
| cg18729973 | 0.4551771 | -352.7258 | -0.2906497 | 0.7458268 | TFF1      |
| cg01718139 | 0.4749766 | -352.7258 | -0.2908173 | 0.7657939 | UNQ3033   |
| cg08292050 | 0.4659346 | -352.7258 | -0.292015  | 0.7579495 | SOCS4     |
| cg08314660 | 0.5556598 | -352.7258 | -0.2920957 | 0.8477555 | PKP3      |
| cg23444894 | 0.4506426 | -352.7258 | -0.2921478 | 0.7427903 | UNQ5810   |
| cg12582965 | 0.5664625 | -352.7258 | -0.2924071 | 0.8588696 | ATP10A    |
| cg15589427 | 0.441911  | -352.7258 | -0.2926293 | 0.7345403 | MUC4      |
| cg23580945 | 0.4572249 | -352.7258 | -0.292644  | 0.7498689 | FLJ43826  |
| cg26473272 | 0.5734994 | -352.7258 | -0.2938896 | 0.867389  | SYT8      |
| cg04132607 | 0.5651802 | -352.7258 | -0.2939441 | 0.8591244 | GATA5     |
| cg16242770 | 0.4682765 | -352.7258 | -0.2939444 | 0.7622209 | KRTAP17-1 |
|            |           |           |            |           | SERPINA1  |
| cg05485062 | 0.4822264 | -352.7258 | -0.2946281 | 0.7768545 | 2         |
| cg17264470 | 0.5595945 | -352.7258 | -0.2947577 | 0.8543522 | FGF21     |
| cg27285599 | 0.4648957 | -352.7258 | -0.2966847 | 0.7615805 | FLJ13841  |
| cg08453096 | 0.5290136 | -352.7258 | -0.2968788 | 0.8258924 | ABCG5     |
| cg23514672 | 0.5750664 | -352.7258 | -0.2976111 | 0.8726774 | FLJ32871  |
| cg24363955 | 0.4870755 | -352.7258 | -0.29849   | 0.7855654 | FLJ14054  |
| cg27235662 | 0.4582622 | -352.7258 | -0.2988682 | 0.7571304 | CLDN16    |

|            |           |           |            |           |              |
|------------|-----------|-----------|------------|-----------|--------------|
| cg17820828 | 0.4241687 | -352.7258 | -0.3003717 | 0.7245404 | KCNQ1        |
| cg26422060 | 0.4854029 | -352.7258 | -0.3006387 | 0.7860416 | TBX10        |
| cg25781162 | 0.4525527 | -352.7258 | -0.3014656 | 0.7540183 | ABCG5        |
| cg18508525 | 0.5102794 | -352.7258 | -0.3014731 | 0.8117525 | CD36         |
| cg10213812 | 0.5602913 | -352.7258 | -0.3027199 | 0.8630112 | FOXN1        |
| cg08341924 | 0.454426  | -352.7258 | -0.3039003 | 0.7583263 | TGM1         |
| cg05440289 | 0.4500387 | -352.7258 | -0.3046627 | 0.7547014 | IVL          |
| cg04953015 | 0.4071358 | -352.7258 | -0.3065434 | 0.7136792 | CHRNA2       |
| cg04816348 | 0.5596771 | -352.7258 | -0.3065904 | 0.8662676 | CLEC4G       |
| cg08475088 | 0.5412613 | -352.7258 | -0.3072374 | 0.8484987 | NALP9        |
| cg25778166 | 0.417122  | -352.7258 | -0.3077362 | 0.7248582 | FMO3         |
| cg24407065 | 0.4939486 | -352.7258 | -0.3093171 | 0.8032658 | BLZF1        |
| cg27377450 | 0.497348  | -352.7258 | -0.3094599 | 0.8068079 | ARHGEF18     |
| cg19845843 | 0.4005892 | -352.7258 | -0.3094771 | 0.7100663 | CXorf20      |
| cg08424423 | 0.4908563 | -352.7258 | -0.3100212 | 0.8008775 | CDSN         |
| cg07792737 | 0.5020545 | -352.7258 | -0.3102618 | 0.8123163 | NPIP         |
| cg01643624 | 0.4163384 | -352.7258 | -0.3102866 | 0.726625  | C11orf16     |
| cg17741572 | 0.4864202 | -352.7258 | -0.3106194 | 0.7970396 | CFB          |
| cg19561774 | 0.5484324 | -352.7258 | -0.3108134 | 0.8592458 | SLC22A2      |
| cg05556202 | 0.4470188 | -352.7258 | -0.3110004 | 0.7580193 | TM4SF19      |
| cg01827098 | 0.4837575 | -352.7258 | -0.31135   | 0.7951075 | GIMAP7       |
| cg18121684 | 0.367482  | -352.7258 | -0.3126186 | 0.6801006 | SERPINB13    |
| cg15516226 | 0.483029  | -352.7258 | -0.3151099 | 0.7981389 | BTNL9        |
| cg11739626 | 0.3849224 | -352.7258 | -0.3154379 | 0.7003604 | AKT1S1       |
| cg15905124 | 0.4554797 | -352.7258 | -0.3157116 | 0.7711913 | MGC1303<br>4 |
| cg14333565 | 0.4755068 | -352.7258 | -0.3159598 | 0.7914666 | NRTN         |
| cg06236276 | 0.4412875 | -352.7258 | -0.3168153 | 0.7581028 | SLC22A2      |
| cg17829936 | 0.3679025 | -352.7258 | -0.3175393 | 0.6854419 | TAAR5        |
| cg01657380 | 0.3522651 | -352.7258 | -0.3176072 | 0.6698722 | NPFF         |
| cg25033144 | 0.4147533 | -352.7258 | -0.3178829 | 0.7326362 | FLJ00060     |
| cg19233472 | 0.4040452 | -352.7258 | -0.3183095 | 0.7223547 | FOXI1        |
| cg22190114 | 0.397056  | -352.7258 | -0.3183255 | 0.7153814 | NALP8        |
| cg23776892 | 0.4579759 | -352.7258 | -0.3186967 | 0.7766726 | MAGEA1       |
| cg02067021 | 0.3696525 | -352.7258 | -0.3189273 | 0.6885798 | DNAJC5B      |
| cg02442161 | 0.4338206 | -352.7258 | -0.3193065 | 0.7531271 | PI3          |
| cg21065959 | 0.3393786 | -352.7258 | -0.3194018 | 0.6587805 | LCE1E        |
| cg18138484 | 0.5063573 | -352.7258 | -0.3194674 | 0.8258247 | CABP2        |
| cg13656062 | 0.4324334 | -352.7258 | -0.3196643 | 0.7520977 | CYP4F2       |
| cg01774645 | 0.3627444 | -352.7258 | -0.3197696 | 0.682514  | ARHGAP30     |
| cg13928961 | 0.381842  | -352.7258 | -0.3199427 | 0.7017848 | K6IRS3       |
| cg04323365 | 0.4239616 | -352.7258 | -0.3202024 | 0.744164  | GJB1         |
| cg19047670 | 0.3474835 | -352.7258 | -0.321182  | 0.6686655 | CCND1        |
| cg24027679 | 0.4544323 | -352.7258 | -0.3215316 | 0.7759639 | SLC2A7       |
| cg22784047 | 0.3632978 | -352.7258 | -0.3233001 | 0.6865979 | MVP          |

|            |           |           |            |           |           |
|------------|-----------|-----------|------------|-----------|-----------|
| cg22021786 | 0.387661  | -352.7258 | -0.3237695 | 0.7114305 | WFDC8     |
| cg15743985 | 0.3801671 | -352.7258 | -0.3244269 | 0.704594  | CD22      |
| cg25813714 | 0.5184745 | -352.7258 | -0.3251191 | 0.8435937 | CYP4F12   |
| cg18979223 | 0.3353037 | -352.7258 | -0.3252977 | 0.6606013 | CDKN2B    |
| cg11158374 | 0.3795393 | -352.7258 | -0.3255305 | 0.7050698 | TFF2      |
| cg26583078 | 0.3343017 | -352.7258 | -0.3268023 | 0.6611041 | SORBS2    |
| cg24735489 | 0.2974933 | -352.7258 | -0.3269925 | 0.6244857 | CDSN      |
| cg18242139 | 0.3858212 | -352.7258 | -0.3275895 | 0.7134107 | ELAVL4    |
| cg19042947 | 0.3109535 | -352.7258 | -0.3277499 | 0.6387034 | SERPINA4  |
| cg00756887 | 0.3576337 | -352.7258 | -0.3278273 | 0.685461  | PVRL4     |
| cg12619162 | 0.4404047 | -352.7258 | -0.3281966 | 0.7686013 | FXYP4     |
| cg08244028 | 0.3248578 | -352.7258 | -0.3281984 | 0.6530562 | MSH3      |
| cg19982860 | 0.3011699 | -352.7258 | -0.3283057 | 0.6294757 | IFNA21    |
| cg10677144 | 0.3828415 | -352.7258 | -0.3284062 | 0.7112477 | MYOM1     |
| cg10322876 | 0.2947809 | -352.7258 | -0.3287002 | 0.6234811 | CYP2B6    |
| cg11719283 | 0.3286717 | -352.7258 | -0.3299251 | 0.6585968 | ZNF574    |
| cg04505023 | 0.3695696 | -352.7258 | -0.3301733 | 0.6997429 | SPRR1A    |
| cg06351503 | 0.3559565 | -352.7258 | -0.3306718 | 0.6866283 | RDBP      |
| cg06244417 | 0.4433347 | -352.7258 | -0.3314513 | 0.774786  | FCN1      |
| cg24490338 | 0.3882649 | -352.7258 | -0.3316314 | 0.7198963 | TPM3      |
| cg09299388 | 0.3654354 | -352.7258 | -0.331652  | 0.6970874 | PGK2      |
| cg00321478 | 0.3246931 | -352.7258 | -0.3318038 | 0.6564969 | CRB1      |
| cg06811800 | 0.34313   | -352.7258 | -0.3321946 | 0.6753246 | ATP4B     |
| cg19859270 | 0.3507019 | -352.7258 | -0.3322437 | 0.6829456 | GPR15     |
| cg13019092 | 0.4002278 | -352.7258 | -0.3325507 | 0.7327785 | PDZK1     |
| cg06832950 | 0.4426368 | -352.7258 | -0.3333757 | 0.7760125 | SPG3A     |
| cg02844051 | 0.402856  | -352.7258 | -0.3333786 | 0.7362346 | ZD52F10   |
| cg19728577 | 0.4393969 | -352.7258 | -0.3335593 | 0.7729563 | GUCA2B    |
| cg24992780 | 0.4628873 | -352.7258 | -0.335784  | 0.7986712 | OR7C1     |
| cg06436504 | 0.3334668 | -352.7258 | -0.336174  | 0.6696407 | DOC1      |
| cg10575735 | 0.264506  | -352.7258 | -0.3362779 | 0.6007839 | SSX4      |
| cg00334507 | 0.2876406 | -352.7258 | -0.3366624 | 0.6243029 | MVP       |
| cg14238120 | 0.3758136 | -352.7258 | -0.3368861 | 0.7126997 | ELA3A     |
| cg14182690 | 0.4535824 | -352.7258 | -0.337314  | 0.7908964 | RUNX3     |
| cg16462075 | 0.3874975 | -352.7258 | -0.3373244 | 0.7248219 | MUC3B     |
| cg10569414 | 0.3507375 | -352.7258 | -0.3387423 | 0.6894798 | C21orf121 |
| cg26063872 | 0.3036302 | -352.7258 | -0.3387739 | 0.6424041 | DEFB123   |
| cg16626670 | 0.3067236 | -352.7258 | -0.3394825 | 0.6462061 | CLEC4G    |
| cg25762706 | 0.2296134 | -352.7258 | -0.3396084 | 0.5692218 | STMN4     |
| cg09701102 | 0.4130652 | -352.7258 | -0.3400567 | 0.7531219 | NDUFV1    |
| cg09414535 | 0.2630463 | -352.7258 | -0.3406519 | 0.6036983 | GRIP1     |
| cg08684473 | 0.4068898 | -352.7258 | -0.3414935 | 0.7483833 | LILRB5    |
| cg13578652 | 0.293515  | -352.7258 | -0.3416146 | 0.6351296 | UBASH3A   |
| cg03364781 | 0.3393791 | -352.7258 | -0.3417831 | 0.6811622 | ALPK1     |
| cg19949550 | 0.3963192 | -352.7258 | -0.3425038 | 0.7388231 | ASB2      |

|            |           |           |            |           |                |
|------------|-----------|-----------|------------|-----------|----------------|
| cg08970446 | 0.4800559 | -352.7258 | -0.3425328 | 0.8225887 | SLC1A7         |
| cg16122592 | 0.2980184 | -352.7258 | -0.3425364 | 0.6405548 | MAGEB6         |
| cg09027725 | 0.2859382 | -352.7258 | -0.3434309 | 0.6293691 | COX4I2         |
| cg01515887 | 0.3850819 | -352.7258 | -0.3436621 | 0.7287439 | SAA2           |
| cg21372914 | 0.3703009 | -352.7258 | -0.3437272 | 0.7140282 | CLEC4M         |
| cg13204181 | 0.2871337 | -352.7258 | -0.3440327 | 0.6311664 | GH1            |
| cg15780361 | 0.2069186 | -352.7258 | -0.3444721 | 0.5513908 | ALS2CR11       |
| cg01015871 | 0.271356  | -352.7258 | -0.3453859 | 0.6167418 | MT4            |
| cg00698688 | 0.4582555 | -352.7258 | -0.345812  | 0.8040674 | SULT2B1        |
| cg22264436 | 0.400654  | -352.7258 | -0.3462388 | 0.7468928 | SOST           |
| cg14894144 | 0.1326733 | -352.7258 | -0.3467807 | 0.479454  | LAMA3          |
| cg06501790 | 0.3211504 | -352.7258 | -0.3468962 | 0.6680466 | SLC34A1        |
| cg19807685 | 0.3276089 | -352.7258 | -0.3480022 | 0.6756111 | HSD17B2        |
| cg04138756 | 0.432207  | -352.7258 | -0.3484236 | 0.7806306 | SPRR3          |
| cg12456510 | 0.3302532 | -352.7258 | -0.3493097 | 0.6795629 | TFF2           |
| cg12334759 | 0.3484569 | -352.7258 | -0.3495133 | 0.6979702 | C19orf19       |
| cg15711744 | 0.4125352 | -352.7258 | -0.3499882 | 0.7625234 | ANP32D         |
| cg04711324 | 0.2146701 | -352.7258 | -0.3504212 | 0.5650914 | RIT2           |
| cg06220755 | 0.2665477 | -352.7258 | -0.3515683 | 0.618116  | RAI2           |
| cg13521229 | 0.2011699 | -352.7258 | -0.3519498 | 0.5531197 | JOSD2          |
| cg18780284 | 0.3286064 | -352.7258 | -0.3527872 | 0.6813936 | SPRR1B         |
| cg08626653 | 0.3579938 | -352.7258 | -0.3530059 | 0.7109996 | FLJ37538       |
| cg14845091 | 0.2703709 | -352.7258 | -0.3542931 | 0.624664  | ADPRHL1        |
| cg21686987 | 0.421128  | -352.7258 | -0.3553501 | 0.7764781 | CTRB1          |
| cg26149550 | 0.4329793 | -352.7258 | -0.3555669 | 0.7885463 | KLK15          |
| cg19712821 | 0.2107486 | -352.7258 | -0.35605   | 0.5667985 | KSP37          |
| cg05671018 | 0.3217638 | -352.7258 | -0.3576182 | 0.679382  | LYSMD2         |
| cg19954000 | 0.1437485 | -352.7258 | -0.3582378 | 0.5019863 | FGF1           |
| cg12513481 | 0.2019454 | -352.7258 | -0.3583172 | 0.5602626 | SCAP1          |
| cg16990174 | 0.1886213 | -352.7258 | -0.3588667 | 0.547488  | RYBP           |
| cg05348870 | 0.4103637 | -352.7258 | -0.3590327 | 0.7693964 | TNFSF14        |
| cg25214346 | 0.2945686 | -352.7258 | -0.3595974 | 0.654166  | NR1I3          |
| cg17357062 | 0.4647044 | -352.7258 | -0.3610505 | 0.8257549 | FCN1           |
| cg14696820 | 0.2394022 | -352.7258 | -0.3615471 | 0.6009493 | LCE1A          |
| cg10990993 | 0.2366186 | -352.7258 | -0.3619145 | 0.5985331 | MLH1           |
| cg07997737 | 0.2083139 | -352.7258 | -0.3639787 | 0.5722926 | NRTN           |
| cg24670715 | 0.1353427 | -352.7258 | -0.3643004 | 0.4996431 | ANGPT2         |
| cg10758292 | 0.4024503 | -352.7258 | -0.3674083 | 0.7698587 | DEFA1          |
| cg10805676 | 0.3448183 | -352.7258 | -0.3685068 | 0.7133251 | MRPL28         |
| cg15503752 | 0.360881  | -352.7258 | -0.3688481 | 0.7297292 | ST6GALNA<br>C1 |
| cg20373326 | 0.3116225 | -352.7258 | -0.3693771 | 0.6809996 | HSD17B2        |
| cg06101324 | 0.125056  | -352.7258 | -0.3703675 | 0.4954236 | SPRR1A         |
| cg23412777 | 0.269934  | -352.7258 | -0.3725881 | 0.6425221 | PYGO1          |
| cg03221619 | 0.1797764 | -352.7258 | -0.3735154 | 0.5532917 | FCER2          |

|            |            |           |            |           |               |
|------------|------------|-----------|------------|-----------|---------------|
| cg07824742 | 0.3852971  | -352.7258 | -0.3737741 | 0.7590712 | DBH           |
| cg12489960 | 0.2942555  | -352.7258 | -0.3745919 | 0.6688474 | SGCB          |
| cg15928132 | 0.2321469  | -352.7258 | -0.3754201 | 0.607567  | CCKAR         |
| cg03602500 | 0.35479    | -352.7258 | -0.3759074 | 0.7306974 | FLJ00060      |
| cg12815142 | 0.299954   | -352.7258 | -0.3761719 | 0.6761258 | SPAG7         |
| cg19728223 | 0.1609787  | -352.7258 | -0.3773999 | 0.5383787 | KCNQ1         |
| cg16175263 | 0.1847211  | -352.7258 | -0.3782085 | 0.5629296 | TNFRSF10<br>C |
| cg16772207 | 0.2412168  | -352.7258 | -0.3790152 | 0.620232  | MYT1          |
| cg21948655 | 0.4169995  | -352.7258 | -0.3818741 | 0.7988736 | SMCP          |
| cg14706739 | 0.3101248  | -352.7258 | -0.3824512 | 0.6925761 | EPB49         |
| cg10062065 | 0.2730348  | -352.7258 | -0.3853163 | 0.6583511 | APEG1         |
| cg15652212 | 0.3076275  | -352.7258 | -0.3857479 | 0.6933754 | FLJ90586      |
| cg06639544 | 0.3525002  | -352.7258 | -0.3860151 | 0.7385153 | OR7A5         |
| cg20544605 | 0.2716411  | -352.7258 | -0.3860601 | 0.6577012 | SORBS2        |
| cg05444024 | 0.4657555  | -352.7258 | -0.3860934 | 0.8518489 | FUT6          |
| cg05766474 | 0.4313662  | -352.7258 | -0.3871159 | 0.818482  | CCL16         |
| cg06123346 | 0.2325662  | -352.7258 | -0.3874289 | 0.6199951 | ATP4A         |
| cg08450982 | 0.2010452  | -352.7258 | -0.3876922 | 0.5887374 | NUMBL         |
| cg17907567 | 0.2331067  | -352.7258 | -0.3886868 | 0.6217936 | HAMP          |
| cg22575540 | 0.3654611  | -352.7258 | -0.3903983 | 0.7558594 | TRIM54        |
| cg24024214 | 0.4307597  | -352.7258 | -0.3907897 | 0.8215494 | BTNL8         |
| cg25119415 | 0.2958256  | -352.7258 | -0.3921153 | 0.687941  | MNDA          |
| cg26292028 | 0.2968556  | -352.7258 | -0.3931316 | 0.6899872 | FLJ37587      |
| cg14256699 | 0.4664212  | -352.7258 | -0.3939674 | 0.8603887 | SOST          |
| cg26672426 | 0.231858   | -352.7258 | -0.3943669 | 0.626225  | PTGES         |
| cg18149207 | 0.3363262  | -352.7258 | -0.397025  | 0.7333511 | RORC          |
| cg24694549 | 0.2414251  | -352.7258 | -0.3988756 | 0.6403007 | GRIP1         |
| cg23815000 | 0.3258845  | -352.7258 | -0.4013108 | 0.7271953 | LCN1          |
| cg08573687 | 0.2775849  | -352.7258 | -0.4031323 | 0.6807172 | TH            |
| cg01335367 | 0.1201917  | -352.7258 | -0.4031591 | 0.5233509 | C12orf34      |
| cg06536578 | 0.2461314  | -352.7258 | -0.4040142 | 0.6501456 | JPH4          |
| cg21457804 | 0.3457561  | -352.7258 | -0.4047585 | 0.7505146 | CT45-2        |
| cg20154346 | 0.2303925  | -352.7258 | -0.4075936 | 0.6379861 | RAI2          |
| cg25221254 | 0.3149043  | -352.7258 | -0.4115398 | 0.7264441 | ASAH3         |
| cg14204735 | 0.05277788 | -352.7258 | -0.4133677 | 0.4661456 | CYB561        |
| cg22374142 | 0.0816729  | -352.7258 | -0.4160036 | 0.4976765 | HSF4          |
| cg01103730 | 0.2788593  | -352.7258 | -0.418511  | 0.6973703 | IL20          |
| cg20334738 | 0.2266694  | -352.7258 | -0.4222124 | 0.6488818 | MAB21L2       |
| cg26927807 | 0.2692144  | -352.7258 | -0.4244381 | 0.6936526 | BTBD2         |
| cg04144768 | 0.2401921  | -352.7258 | -0.4389108 | 0.6791029 | DDC           |
| cg14992108 | 0.2813344  | -352.7258 | -0.4389236 | 0.7202581 | SNTB1         |
| cg27619475 | 0.1166617  | -352.7258 | -0.4398244 | 0.5564861 | SLC16A5       |
| cg13726507 | 0.3676315  | -352.7258 | -0.4607867 | 0.8284182 | CTAG2         |
| cg25856811 | 0.2489789  | -352.7258 | -0.4689779 | 0.7179568 | SPRR3         |



|            |            |           |            |           |      |
|------------|------------|-----------|------------|-----------|------|
| cg26164184 | 0.3354425  | -352.7258 | -0.4794727 | 0.8149152 | FCN2 |
| cg13021192 | 0.09783199 | -352.7258 | -0.5026841 | 0.6005161 | CTSZ |
| cg16179125 | 0.1330246  | -352.7258 | -0.5101755 | 0.6432001 | CTSZ |

**Supplementary table 3 – probes differentially methylated between cluster B and normal tissue**

| TargetID   | Cluster B.AVG_Beta | Cluster B.DiffScore | Cluster B.Delta Beta | Normal.AVG_Beta | SYMBOL   |
|------------|--------------------|---------------------|----------------------|-----------------|----------|
| cg13099330 | 0.4842643          | 346.7507            | 0.3202974            | 0.163967        | RBP1     |
| cg26509022 | 0.4911016          | 346.7507            | 0.2877263            | 0.2033753       | ALDH1A3  |
| cg07360692 | 0.5004826          | 346.7507            | 0.2766723            | 0.2238103       | FLJ20032 |
| cg15310873 | 0.65658            | 346.7507            | 0.273802             | 0.382778        | C20orf85 |
| cg06507244 | 0.7190354          | 346.7507            | 0.2725549            | 0.4464805       | DHX32    |
| cg23855989 | 0.4822389          | 346.7507            | 0.2627599            | 0.2194789       | AQP5     |
| cg27652350 | 0.3916925          | 346.7507            | 0.2601677            | 0.1315248       | ALDH1A3  |
| cg22392666 | 0.4241241          | 346.7507            | 0.2574953            | 0.1666288       | FXYP7    |
| cg16046376 | 0.6111804          | 346.7507            | 0.2557272            | 0.3554532       | PC       |
| cg19224278 | 0.5681682          | 346.7507            | 0.2532995            | 0.3148687       | ALDH1A3  |
| cg18818531 | 0.630201           | 346.7507            | 0.2471147            | 0.3830863       | FOSL1    |
| cg25936385 | 0.8055148          | 346.7507            | 0.2457882            | 0.5597265       | FAIM2    |
| cg13906813 | 0.6428428          | 346.7507            | 0.2436529            | 0.3991899       | HLA-DPA1 |
| cg22628873 | 0.6939286          | 346.7507            | 0.2411               | 0.4528286       | GGT6     |
| cg08624249 | 0.71727            | 346.7507            | 0.2382398            | 0.4790302       | KIAA0889 |
| cg06392241 | 0.3769304          | 346.7507            | 0.2358713            | 0.1410591       | NUDT4    |
| cg02676865 | 0.3579776          | 346.7507            | 0.2331076            | 0.12487         | UBTD1    |
| cg01333011 | 0.5348968          | 346.7507            | 0.2316751            | 0.3032217       | PTHLH    |
| cg02000005 | 0.367604           | 346.7507            | 0.2286451            | 0.1389588       | CRIP1    |
| cg00446235 | 0.3615425          | 346.7507            | 0.2285267            | 0.1330158       | F11R     |
| cg03271907 | 0.8130926          | 346.7507            | 0.2244358            | 0.5886568       | MGMT     |
| cg10521852 | 0.4628236          | 346.7507            | 0.2212826            | 0.241541        | EDG4     |
| cg01683883 | 0.317448           | 346.7507            | 0.2164093            | 0.1010387       | CMTM2    |
| cg01561916 | 0.2709986          | 346.7507            | 0.2155201            | 0.05547852      | HAAO     |
| cg17067528 | 0.2945692          | 346.7507            | 0.2128365            | 0.08173271      | IER3     |
| cg16517394 | 0.4155173          | 346.7507            | 0.2107866            | 0.2047307       | TNFSF4   |
| cg04369341 | 0.3909286          | 346.7507            | 0.2085526            | 0.182376        | C20orf10 |
| cg03001305 | 0.3226499          | 346.7507            | 0.2028558            | 0.1197941       | STAT5A   |
| cg01103836 | 0.8753666          | 346.7507            | 0.2004084            | 0.6749582       | MYO9B    |
| cg21604615 | 0.3572092          | 346.7507            | 0.2001896            | 0.1570196       | SYTL1    |
| cg03605761 | 0.592015           | 129.8385            | 0.234914             | 0.357101        | RNF126   |
| cg07285276 | 0.7507304          | 127.2488            | 0.2286515            | 0.5220789       | RAPGEF1  |
| cg06204948 | 0.4349718          | 127.2488            | 0.2086568            | 0.226315        | MARK2    |
| cg10150813 | 0.5270693          | 125.6838            | 0.2242339            | 0.3028354       | KIAA0746 |

|            |           |           |            |           |               |
|------------|-----------|-----------|------------|-----------|---------------|
| cg23696949 | 0.4522658 | 125.6838  | 0.2120227  | 0.2402431 | LAMC2         |
| cg25447894 | 0.4053745 | 125.6838  | 0.2018072  | 0.2035673 | CSDC2         |
| cg16363586 | 0.5361763 | 124.5603  | 0.2245668  | 0.3116095 | BST2          |
| cg26822175 | 0.8224487 | 124.5603  | 0.2094749  | 0.6129738 | CRYBA4        |
| cg20289949 | 0.4468058 | 122.1916  | 0.2081956  | 0.2386102 | HA AO         |
| cg14371590 | 0.5279977 | 114.4628  | 0.2162207  | 0.3117769 | SLC26A1<br>0  |
| cg20439022 | 0.5890222 | 112.8358  | 0.2205583  | 0.3684638 | SLC16A8       |
| cg17790333 | 0.7113694 | 112.13    | 0.2187409  | 0.4926285 | CYP11A1       |
| cg12177001 | 0.7358415 | 111.1609  | 0.2151031  | 0.5207384 | IFI27         |
| cg23668631 | 0.5825233 | 110.6471  | 0.2182415  | 0.3642818 | CAMKK1        |
| cg21716693 | 0.4875242 | 109.6252  | 0.2067116  | 0.2808126 | CPNE5         |
| cg27114026 | 0.7430398 | 109.4343  | 0.212241   | 0.5307989 | ELA1          |
| cg06285340 | 0.7981589 | 108.8752  | 0.2011554  | 0.5970035 | CYP11A1       |
| cg02490034 | 0.6152161 | 108.8564  | 0.2180409  | 0.3971752 | MEST          |
| cg18392482 | 0.7536374 | 107.2477  | 0.2082694  | 0.545368  | AMDHD1        |
| cg17686260 | 0.7103856 | 104.9564  | 0.2113963  | 0.4989893 | MGMT          |
| cg15544721 | 0.6912748 | 104.877   | 0.2128296  | 0.4784451 | PPP1R9A       |
| cg07236190 | 0.6969027 | 103.7169  | 0.2112966  | 0.4856061 | AMDHD1        |
| cg14897096 | 0.7658682 | 101.2339  | 0.2000257  | 0.5658425 | PC            |
| cg25580076 | 0.6805679 | 99.48838  | 0.208156   | 0.4724118 | MRPL43        |
| cg12125117 | 0.5952502 | 99.34595  | 0.2084572  | 0.386793  | GPR97         |
| cg25101936 | 0.7064518 | 99.16131  | 0.2058735  | 0.5005782 | ZBTB16        |
| cg24928687 | 0.7324516 | 97.37164  | 0.2012012  | 0.5312504 | EPHX1         |
| cg18172186 | 0.7216625 | 96.12093  | 0.2011699  | 0.5204926 | KIAA1913      |
| cg07251788 | 0.6907666 | 95.4754   | 0.2034234  | 0.4873433 | CLTCL1        |
| cg24670715 | 0.2947156 | -95.41345 | -0.2049274 | 0.4996431 | ANGPT2        |
| cg10275770 | 0.2347893 | -99.98315 | -0.2052656 | 0.4400549 | ICAM2         |
| cg22341310 | 0.2205973 | -105.0623 | -0.2087363 | 0.4293335 | ZNF541        |
| cg13021192 | 0.3870664 | -106.6246 | -0.2134497 | 0.6005161 | CTSZ          |
| cg19917856 | 0.2902949 | -113.4073 | -0.2225608 | 0.5128558 | LOC3428<br>97 |
| cg06536578 | 0.4220054 | -129.8385 | -0.2281402 | 0.6501456 | JPH4          |
| cg12513481 | 0.3163344 | -139.9844 | -0.2439282 | 0.5602626 | SCAP1         |
| cg01335367 | 0.2775647 | -142.2894 | -0.2457862 | 0.5233509 | C12orf34      |
| cg22189286 | 0.4556133 | -149.7886 | -0.2353394 | 0.6909527 | HSPB8         |
| cg14204735 | 0.1824096 | -208.1352 | -0.283736  | 0.4661456 | CYB561        |
| cg21949305 | 0.4451759 | -238.1708 | -0.2801127 | 0.7252886 | ADORA2<br>A   |

**Supplementary table 4 – probes differentially methylated between Malignant tumours and normal tissue**

| TargetID   | Malign.AVG_Beta | Malign.DiffScore | Malign.Delta Beta | Normal medulla.AVG_Beta | SYMBOL   |
|------------|-----------------|------------------|-------------------|-------------------------|----------|
| cg25856811 | 0.1918496       | -353.1397        | -0.5261072        | 0.7179568               | SPRR3    |
| cg16179125 | 0.121508        | -353.1397        | -0.5216921        | 0.6432001               | CTSZ     |
| cg13021192 | 0.08940586      | -353.1397        | -0.5111102        | 0.6005161               | CTSZ     |
| cg21457804 | 0.2417219       | -353.1397        | -0.5087927        | 0.7505146               | CT45-2   |
| cg26164184 | 0.3138765       | -353.1397        | -0.5010387        | 0.8149152               | FCN2     |
| cg13726507 | 0.3325259       | -353.1397        | -0.4958923        | 0.8284182               | CTAG2    |
| cg05444024 | 0.3666006       | -353.1397        | -0.4852483        | 0.8518489               | FUT6     |
| cg14992108 | 0.2360716       | -353.1397        | -0.4841865        | 0.7202581               | SNTB1    |
| cg05766474 | 0.337676        | -353.1397        | -0.480806         | 0.818482                | CCL16    |
| cg04144768 | 0.1990229       | -353.1397        | -0.48008          | 0.6791029               | DDC      |
| cg25221254 | 0.2509786       | -353.1397        | -0.4754656        | 0.7264441               | ASAH3    |
| cg24024214 | 0.3541081       | -353.1397        | -0.4674414        | 0.8215494               | BTNL8    |
| cg15538820 | 0.4530806       | -353.1397        | -0.4634036        | 0.9164841               | OBP2B    |
| cg17907567 | 0.1588891       | -353.1397        | -0.4629045        | 0.6217936               | HAMP     |
| cg25119415 | 0.2266518       | -353.1397        | -0.4612892        | 0.687941                | MNDA     |
| cg15711744 | 0.3049476       | -353.1397        | -0.4575758        | 0.7625234               | ANP32D   |
| cg26927807 | 0.2383257       | -353.1397        | -0.4553268        | 0.6936526               | BTBD2    |
| cg08424423 | 0.3511186       | -353.1397        | -0.4497589        | 0.8008775               | CDSN     |
| cg00698688 | 0.3552629       | -353.1397        | -0.4488046        | 0.8040674               | SULT2B1  |
| cg05348870 | 0.3242536       | -353.1397        | -0.4451429        | 0.7693964               | TNFSF14  |
| cg24694549 | 0.1952028       | -353.1397        | -0.4450979        | 0.6403007               | GRIP1    |
| cg08453096 | 0.381714        | -353.1397        | -0.4441783        | 0.8258924               | ABCG5    |
| cg12456510 | 0.2358742       | -353.1397        | -0.4436887        | 0.6795629               | TFF2     |
| cg21948655 | 0.356401        | -353.1397        | -0.4424726        | 0.7988736               | SMCP     |
| cg06123346 | 0.1808753       | -353.1397        | -0.4391198        | 0.6199951               | ATP4A    |
| cg16462075 | 0.2858849       | -353.1397        | -0.438937         | 0.7248219               | MUC3B    |
| cg15652212 | 0.2563163       | -353.1397        | -0.4370591        | 0.6933754               | FLJ90586 |
| cg20334738 | 0.2134055       | -353.1397        | -0.4354763        | 0.6488818               | MAB21L2  |
| cg14333565 | 0.357435        | -353.1397        | -0.4340316        | 0.7914666               | NRTN     |
| cg01103730 | 0.2664935       | -353.1397        | -0.4308768        | 0.6973703               | IL20     |
| cg04719766 | 0.3542481       | -353.1397        | -0.4296809        | 0.7839289               | KCNQ1    |
| cg17264470 | 0.4252936       | -353.1397        | -0.4290587        | 0.8543522               | FGF21    |
| cg22374142 | 0.06878583      | -353.1397        | -0.4288906        | 0.4976765               | HSF4     |
| cg01015871 | 0.1881558       | -353.1397        | -0.428586         | 0.6167418               | MT4      |
| cg16626670 | 0.2194524       | -353.1397        | -0.4267537        | 0.6462061               | CLEC4G   |
| cg26149550 | 0.3630838       | -353.1397        | -0.4254625        | 0.7885463               | KLK15    |
| cg26292028 | 0.2646607       | -353.1397        | -0.4253265        | 0.6899872               | FLJ37587 |
| cg12513481 | 0.1361822       | -353.1397        | -0.4240803        | 0.5602626               | SCAP1    |
| cg12815142 | 0.2526424       | -353.1397        | -0.4234834        | 0.6761258               | SPAG7    |

|            |           |           |            |           |          |
|------------|-----------|-----------|------------|-----------|----------|
| cg06536578 | 0.2287474 | -353.1397 | -0.4213982 | 0.6501456 | JPH4     |
| cg08970446 | 0.4016043 | -353.1397 | -0.4209844 | 0.8225887 | SLC1A7   |
| cg27619475 | 0.136802  | -353.1397 | -0.4196841 | 0.5564861 | SLC16A5  |
| cg14256699 | 0.4409448 | -353.1397 | -0.4194439 | 0.8603887 | SOST     |
| cg15589427 | 0.3151931 | -353.1397 | -0.4193472 | 0.7345403 | MUC4     |
| cg08573687 | 0.2624885 | -353.1397 | -0.4182287 | 0.6807172 | TH       |
| cg21686987 | 0.3583098 | -353.1397 | -0.4181683 | 0.7764781 | CTRB1    |
| cg17829936 | 0.2673488 | -353.1397 | -0.4180931 | 0.6854419 | TAAR5    |
| cg18149207 | 0.3156386 | -353.1397 | -0.4177125 | 0.7333511 | RORC     |
| cg13578652 | 0.2178856 | -353.1397 | -0.4172439 | 0.6351296 | UBASH3A  |
| cg13928961 | 0.2845886 | -353.1397 | -0.4171962 | 0.7017848 | K6IRS3   |
| cg06639544 | 0.3216326 | -353.1397 | -0.4168827 | 0.7385153 | OR7A5    |
| cg03602500 | 0.3148318 | -353.1397 | -0.4158656 | 0.7306974 | FLJ00060 |
| cg20154346 | 0.2241253 | -353.1397 | -0.4138608 | 0.6379861 | RAI2     |
| cg03364781 | 0.2681359 | -353.1397 | -0.4130263 | 0.6811622 | ALPK1    |
| cg14204735 | 0.0544948 | -353.1397 | -0.4116508 | 0.4661456 | CYB561   |
| cg01774645 | 0.2713733 | -353.1397 | -0.4111406 | 0.682514  | ARHGAP30 |
| cg09542291 | 0.3586163 | -353.1397 | -0.4108144 | 0.7694307 | SMCP     |
| cg16772207 | 0.2098051 | -353.1397 | -0.4104269 | 0.620232  | MYT1     |
| cg20544605 | 0.247885  | -353.1397 | -0.4098162 | 0.6577012 | SORBS2   |
| cg20373326 | 0.271272  | -353.1397 | -0.4097276 | 0.6809996 | HSD17B2  |
| cg12489960 | 0.2596922 | -353.1397 | -0.4091552 | 0.6688474 | SGCB     |
| cg08450982 | 0.1796286 | -353.1397 | -0.4091088 | 0.5887374 | NUMBL    |
| cg01144251 | 0.324304  | -353.1397 | -0.4090076 | 0.7333116 | KLK9     |
| cg19859270 | 0.2742115 | -353.1397 | -0.4087341 | 0.6829456 | GPR15    |
| cg06501790 | 0.2594283 | -353.1397 | -0.4086183 | 0.6680466 | SLC34A1  |
| cg19561774 | 0.450701  | -353.1397 | -0.4085449 | 0.8592458 | SLC22A2  |
| cg23776892 | 0.3681794 | -353.1397 | -0.4084932 | 0.7766726 | MAGEA1   |
| cg10758292 | 0.3616349 | -353.1397 | -0.4082238 | 0.7698587 | DEFA1    |
| cg21065959 | 0.2506559 | -353.1397 | -0.4081246 | 0.6587805 | LCE1E    |
| cg19845843 | 0.302144  | -353.1397 | -0.4079224 | 0.7100663 | CXorf20  |
| cg19728577 | 0.3651664 | -353.1397 | -0.4077898 | 0.7729563 | GUCA2B   |
| cg07126559 | 0.3519461 | -353.1397 | -0.4073638 | 0.7593099 | SGCG     |
| cg22575540 | 0.3486045 | -353.1397 | -0.4072548 | 0.7558594 | TRIM54   |
| cg07997737 | 0.1653667 | -353.1397 | -0.4069259 | 0.5722926 | NRTN     |
| cg04816348 | 0.4607313 | -353.1397 | -0.4055363 | 0.8662676 | CLEC4G   |
| cg08475088 | 0.4432616 | -353.1397 | -0.4052371 | 0.8484987 | NALP9    |
| cg17741572 | 0.3925749 | -353.1397 | -0.4044648 | 0.7970396 | CFB      |
| cg01718139 | 0.3616614 | -353.1397 | -0.4041325 | 0.7657939 | UNQ3033  |
| cg18780284 | 0.2774399 | -353.1397 | -0.4039537 | 0.6813936 | SPRR1B   |
| cg01335367 | 0.1194096 | -353.1397 | -0.4039413 | 0.5233509 | C12orf34 |
| cg03221619 | 0.1505491 | -353.1397 | -0.4027427 | 0.5532917 | FCER2    |
| cg18920397 | 0.3002461 | -353.1397 | -0.4024632 | 0.7027093 | LY9      |
| cg26672426 | 0.2244904 | -353.1397 | -0.4017346 | 0.626225  | PTGES    |
| cg23815000 | 0.3258466 | -353.1397 | -0.4013486 | 0.7271953 | LCN1     |

|            |           |           |            |           |           |
|------------|-----------|-----------|------------|-----------|-----------|
| cg00727947 | 0.4717107 | -353.1397 | -0.4013401 | 0.8730508 | LILRA5    |
| cg18790143 | 0.2997488 | -353.1397 | -0.4011573 | 0.7009061 | OTOS      |
| cg17357062 | 0.4248715 | -353.1397 | -0.4008835 | 0.8257549 | FCN1      |
| cg15928132 | 0.20705   | -353.1397 | -0.400517  | 0.607567  | CCKAR     |
| cg14942312 | 0.2825689 | -353.1397 | -0.3997276 | 0.6822965 | GPR119    |
| cg20095587 | 0.3152015 | -353.1397 | -0.3995068 | 0.7147083 | TREM2     |
| cg16122592 | 0.2417291 | -353.1397 | -0.3988257 | 0.6405548 | MAGEB6    |
| cg19807685 | 0.2770931 | -353.1397 | -0.398518  | 0.6756111 | HSD17B2   |
| cg16175263 | 0.1646563 | -353.1397 | -0.3982733 | 0.5629296 | TNFRSF10C |
| cg08684473 | 0.3505404 | -353.1397 | -0.3978429 | 0.7483833 | LILRB5    |
| cg14696820 | 0.2034238 | -353.1397 | -0.3975255 | 0.6009493 | LCE1A     |
| cg18121684 | 0.2844862 | -353.1397 | -0.3956144 | 0.6801006 | SERPINB13 |
| cg06220755 | 0.2228054 | -353.1397 | -0.3953106 | 0.618116  | RAI2      |
| cg23412777 | 0.2478148 | -353.1397 | -0.3947073 | 0.6425221 | PYGO1     |
| cg20649991 | 0.3407245 | -353.1397 | -0.3946531 | 0.7353776 | LILRB5    |
| cg14150666 | 0.4415726 | -353.1397 | -0.3938573 | 0.8354299 | IL8RB     |
| cg10569414 | 0.2957648 | -353.1397 | -0.393715  | 0.6894798 | C21orf121 |
| cg10062065 | 0.2646952 | -353.1397 | -0.393656  | 0.6583511 | APEG1     |
| cg14182690 | 0.3976696 | -353.1397 | -0.3932269 | 0.7908964 | RUNX3     |
| cg10575735 | 0.2076187 | -353.1397 | -0.3931652 | 0.6007839 | SSX4      |
| cg12061127 | 0.2759923 | -353.1397 | -0.3927724 | 0.6687647 | WFDC9     |
| cg07824742 | 0.3666477 | -353.1397 | -0.3924235 | 0.7590712 | DBH       |
| cg22264436 | 0.3548968 | -353.1397 | -0.3919961 | 0.7468928 | SOST      |
| cg14238120 | 0.3209153 | -353.1397 | -0.3917844 | 0.7126997 | ELA3A     |
| cg02844051 | 0.3449644 | -353.1397 | -0.3912702 | 0.7362346 | ZD52F10   |
| cg19368582 | 0.2562717 | -353.1397 | -0.3907607 | 0.6470323 | MMRN2     |
| cg18204685 | 0.2956881 | -353.1397 | -0.3904009 | 0.686089  | BTD       |
| cg11739626 | 0.309971  | -353.1397 | -0.3903894 | 0.7003604 | AKT1S1    |
| cg20822628 | 0.5395295 | -353.1397 | -0.3900813 | 0.9296108 | GATA5     |
| cg10990993 | 0.2086779 | -353.1397 | -0.3898552 | 0.5985331 | MLH1      |
| cg07297178 | 0.3714801 | -353.1397 | -0.3879373 | 0.7594174 | CEACAM7   |
| cg15743985 | 0.3192534 | -353.1397 | -0.3853406 | 0.704594  | CD22      |
| cg21495715 | 0.3301479 | -353.1397 | -0.384932  | 0.7150798 | SLC5A10   |
| cg24670715 | 0.1148898 | -353.1397 | -0.3847533 | 0.4996431 | ANGPT2    |
| cg25033144 | 0.3479971 | -353.1397 | -0.3846391 | 0.7326362 | FLJ00060  |
| cg18521925 | 0.510487  | -353.1397 | -0.3839245 | 0.8944114 | SLC22A16  |
| cg22021786 | 0.3278267 | -353.1397 | -0.3836038 | 0.7114305 | WFDC8     |
| cg25214346 | 0.2710718 | -353.1397 | -0.3830943 | 0.654166  | NR1I3     |
| cg14366490 | 0.2547488 | -353.1397 | -0.3828094 | 0.6375582 | TXNL6     |
| cg07441143 | 0.3081239 | -353.1397 | -0.3815116 | 0.6896355 | SLURP1    |
| cg16990174 | 0.1660908 | -353.1397 | -0.3813972 | 0.547488  | RYBP      |
| cg13521229 | 0.1717496 | -353.1397 | -0.3813701 | 0.5531197 | JOSD2     |
| cg00689010 | 0.273333  | -353.1397 | -0.3809897 | 0.6543227 | NCSTN     |
| cg10213812 | 0.4825747 | -353.1397 | -0.3804365 | 0.8630112 | FOXN1     |
| cg24992780 | 0.4185619 | -353.1397 | -0.3801093 | 0.7986712 | OR7C1     |

|            |           |           |            |           |           |
|------------|-----------|-----------|------------|-----------|-----------|
| cg06236276 | 0.3780407 | -353.1397 | -0.3800621 | 0.7581028 | SLC22A2   |
| cg09299388 | 0.3170849 | -353.1397 | -0.3800025 | 0.6970874 | PGK2      |
| cg21372914 | 0.3343245 | -353.1397 | -0.3797037 | 0.7140282 | CLEC4M    |
| cg11158374 | 0.3256954 | -353.1397 | -0.3793744 | 0.7050698 | TFF2      |
| cg08244028 | 0.2741447 | -353.1397 | -0.3789115 | 0.6530562 | MSH3      |
| cg06325687 | 0.5240554 | -353.1397 | -0.3784153 | 0.9024706 | OPN1MW    |
| cg05215575 | 0.1869235 | -353.1397 | -0.3781203 | 0.5650438 | FLJ25410  |
| cg08093398 | 0.274041  | -353.1397 | -0.3779274 | 0.6519684 | PSF1      |
| cg24027679 | 0.3988175 | -353.1397 | -0.3771464 | 0.7759639 | SLC2A7    |
| cg10322876 | 0.2463628 | -353.1397 | -0.3771183 | 0.6234811 | CYP2B6    |
| cg16545105 | 0.2804936 | -353.1397 | -0.3765678 | 0.6570615 | CRHBP     |
| cg04138756 | 0.4050808 | -353.1397 | -0.3755498 | 0.7806306 | SPRR3     |
| cg06101324 | 0.1201795 | -353.1397 | -0.3752441 | 0.4954236 | SPRR1A    |
| cg08471713 | 0.4603995 | -353.1397 | -0.3748561 | 0.8352556 | MEOX1     |
| cg21505334 | 0.3557376 | -353.1397 | -0.3743015 | 0.7300391 | CEACAM5   |
| cg25778166 | 0.3514925 | -353.1397 | -0.3733657 | 0.7248582 | FMO3      |
| cg15481539 | 0.4360782 | -353.1397 | -0.3732135 | 0.8092917 | DEFA5     |
| cg23131950 | 0.3497453 | -353.1397 | -0.3727145 | 0.7224598 | AP2S1     |
| cg19304352 | 0.4199971 | -353.1397 | -0.372569  | 0.7925661 | DEFA4     |
| cg10805676 | 0.3411797 | -353.1397 | -0.3721454 | 0.7133251 | MRPL28    |
| cg03609102 | 0.1991042 | -353.1397 | -0.3721277 | 0.5712318 | MUC5B     |
| cg00941549 | 0.2960889 | -353.1397 | -0.3719942 | 0.6680831 | AKAP4     |
| cg15379858 | 0.5172948 | -353.1397 | -0.3719416 | 0.8892364 | ChGn      |
| cg24355048 | 0.2658559 | -353.1397 | -0.3715847 | 0.6374406 | CTSG      |
| cg26264314 | 0.377984  | -353.1397 | -0.3714495 | 0.7494335 | NALP5     |
| cg16155702 | 0.3981431 | -353.1397 | -0.3712322 | 0.7693753 | FGF21     |
| cg11346450 | 0.3565485 | -353.1397 | -0.3702305 | 0.726779  | UGT1A3    |
| cg10883352 | 0.3023795 | -353.1397 | -0.3702238 | 0.6726032 |           |
| cg04891836 | 0.2747343 | -353.1397 | -0.3699147 | 0.644649  | TNFSF14   |
| cg19047670 | 0.2991976 | -353.1397 | -0.3694679 | 0.6686655 | CCND1     |
| cg12582965 | 0.4902818 | -353.1397 | -0.3685878 | 0.8588696 | ATP10A    |
| cg15516226 | 0.4298694 | -353.1397 | -0.3682695 | 0.7981389 | BTNL9     |
| cg01568736 | 0.3715624 | -353.1397 | -0.3681105 | 0.7396729 | SERPINB7  |
| cg19717150 | 0.2994847 | -353.1397 | -0.3678106 | 0.6672953 | HNF4A     |
| cg09414535 | 0.2360598 | -353.1397 | -0.3676385 | 0.6036983 | GRIP1     |
| cg11884243 | 0.4263784 | -353.1397 | -0.3667518 | 0.7931302 | FCN2      |
| cg08996986 | 0.3119959 | -353.1397 | -0.3661304 | 0.6781263 | EPS8L1    |
| cg23580945 | 0.3838131 | -353.1397 | -0.3660558 | 0.7498689 | FLJ43826  |
| cg15140807 | 0.3757119 | -353.1397 | -0.3659346 | 0.7416465 | FLJ31222  |
| cg20485165 | 0.2828671 | -353.1397 | -0.3652916 | 0.6481587 | WFDC12    |
| cg19954000 | 0.1371843 | -353.1397 | -0.3648021 | 0.5019863 | FGF1      |
| cg16986846 | 0.2279526 | -353.1397 | -0.3645191 | 0.5924717 | SCGB2A1   |
| cg17778867 | 0.3122911 | -353.1397 | -0.3640786 | 0.6763697 | KRTAP10-8 |
| cg10746737 | 0.3413668 | -353.1397 | -0.3638161 | 0.7051829 | HLA-DRB5  |
| cg04711324 | 0.2016328 | -353.1397 | -0.3634586 | 0.5650914 | RIT2      |

|            |           |           |            |           |            |
|------------|-----------|-----------|------------|-----------|------------|
| cg05922591 | 0.4448559 | -353.1397 | -0.3632213 | 0.8080772 | LILRB4     |
| cg27157038 | 0.3870067 | -353.1397 | -0.3629737 | 0.7499803 | DNTT       |
| cg24735489 | 0.2616997 | -353.1397 | -0.362786  | 0.6244857 | CDSN       |
| cg09027725 | 0.2666847 | -353.1397 | -0.3626844 | 0.6293691 | COX4I2     |
| cg10370591 | 0.2568521 | -353.1397 | -0.3626566 | 0.6195087 | TPO        |
| cg01827098 | 0.4326444 | -353.1397 | -0.3624631 | 0.7951075 | GIMAP7     |
| cg09701102 | 0.3910062 | -353.1397 | -0.3621156 | 0.7531219 | NDUFV1     |
| cg13204181 | 0.2691233 | -353.1397 | -0.3620431 | 0.6311664 | GH1        |
| cg18138484 | 0.4637827 | -353.1397 | -0.362042  | 0.8258247 | CABP2      |
| cg15780361 | 0.1895959 | -353.1397 | -0.3617949 | 0.5513908 | ALS2CR11   |
| cg26063872 | 0.2806902 | -353.1397 | -0.3617139 | 0.6424041 | DEFB123    |
| cg25762706 | 0.2077741 | -353.1397 | -0.3614477 | 0.5692218 | STMN4      |
| cg15422147 | 0.3275714 | -353.1397 | -0.3608822 | 0.6884536 | SERPINB5   |
| cg26422060 | 0.4251677 | -353.1397 | -0.3608739 | 0.7860416 | TBX10      |
| cg14706739 | 0.3321406 | -353.1397 | -0.3604355 | 0.6925761 | EPB49      |
| cg10677144 | 0.3509827 | -353.1397 | -0.360265  | 0.7112477 | MYOM1      |
| cg04505023 | 0.3394846 | -353.1397 | -0.3602583 | 0.6997429 | SPRR1A     |
| cg00042156 | 0.2350968 | -353.1397 | -0.360195  | 0.5952918 | MGC16291   |
| cg08459368 | 0.435635  | -353.1397 | -0.3601331 | 0.7957681 | SCGB2A1    |
| cg14284171 | 0.4649712 | -353.1397 | -0.3594196 | 0.8243908 | SSX4       |
| cg27513764 | 0.3042786 | -353.1397 | -0.3592424 | 0.6635211 | EFCAB3     |
| cg24825722 | 0.2371101 | -353.1397 | -0.3586074 | 0.5957175 | ACADVL     |
| cg13053608 | 0.1524696 | -353.1397 | -0.3585205 | 0.5109901 | LGP1       |
| cg01515887 | 0.3704707 | -353.1397 | -0.3582732 | 0.7287439 | SAA2       |
| cg04431776 | 0.4440412 | -353.1397 | -0.3580958 | 0.802137  | GAGE2      |
| cg24750391 | 0.1312689 | -353.1397 | -0.3577673 | 0.4890362 | PON3       |
| cg27291231 | 0.3371188 | -353.1397 | -0.3576799 | 0.6947987 | SSNA1      |
| cg25072962 | 0.2680399 | -353.1397 | -0.3572944 | 0.6253342 | MGC35295   |
| cg24919884 | 0.3008333 | -353.1397 | -0.3571347 | 0.657968  | ARHGEF16   |
| cg10409560 | 0.4086342 | -353.1397 | -0.3571327 | 0.7657669 | FLJ23657   |
| cg12334759 | 0.3408964 | -353.1397 | -0.3570737 | 0.6979702 | C19orf19   |
| cg11113534 | 0.4990594 | -353.1397 | -0.3569139 | 0.8559733 | C20orf70   |
| cg06437862 | 0.40385   | -353.1397 | -0.3562804 | 0.7601305 | TUBA2      |
| cg13656062 | 0.3960565 | -353.1397 | -0.3560413 | 0.7520977 | CYP4F2     |
| cg20488657 | 0.3359535 | -353.1397 | -0.355344  | 0.6912975 | TFF3       |
| cg03104936 | 0.2834188 | -353.1397 | -0.3548747 | 0.6382935 | GRB10      |
| cg15503752 | 0.3760384 | -353.1397 | -0.3536908 | 0.7297292 | ST6GALNAC1 |
| cg13916742 | 0.4317627 | -353.1397 | -0.3536738 | 0.7854365 | SCGB1D1    |
| cg18242139 | 0.3597679 | -353.1397 | -0.3536429 | 0.7134107 | ELAVL4     |
| cg13126790 | 0.3261902 | -353.1397 | -0.3536042 | 0.6797944 | FLJ27255   |
| cg08314660 | 0.4942361 | -353.1397 | -0.3535194 | 0.8477555 | PKP3       |
| cg05485062 | 0.4250809 | -353.1397 | -0.3517736 | 0.7768545 | SERPINA12  |
| cg00075967 | 0.3638342 | -353.1397 | -0.351428  | 0.7152622 | STRA6      |
| cg00644033 | 0.5665978 | -353.1397 | -0.3509686 | 0.9175664 | MUC3B      |
| cg17788013 | 0.3470318 | -353.1397 | -0.3504829 | 0.6975147 | SPINK5     |

|            |           |           |            |           |           |
|------------|-----------|-----------|------------|-----------|-----------|
| cg15741706 | 0.3452654 | -353.1397 | -0.3497967 | 0.6950621 | CXorf48   |
| cg05556202 | 0.4084814 | -353.1397 | -0.3495379 | 0.7580193 | TM4SF19   |
| cg27377450 | 0.4576887 | -353.1397 | -0.3491192 | 0.8068079 | ARHGEF18  |
| cg00520135 | 0.5070312 | -353.1397 | -0.3484875 | 0.8555187 | TPM1      |
| cg06244417 | 0.4265561 | -353.1397 | -0.3482299 | 0.774786  | FCN1      |
| cg21168884 | 0.4030654 | -353.1397 | -0.348201  | 0.7512664 | C6orf122  |
| cg17298704 | 0.4519594 | -353.1397 | -0.3474759 | 0.7994353 | CLDN18    |
| cg22784047 | 0.3397102 | -353.1397 | -0.3468877 | 0.6865979 | MVP       |
| cg25781162 | 0.4075105 | -353.1397 | -0.3465078 | 0.7540183 | ABCG5     |
| cg25903122 | 0.4034972 | -353.1397 | -0.3456905 | 0.7491877 | MGC2747   |
| cg06832950 | 0.4306082 | -353.1397 | -0.3454043 | 0.7760125 | SPG3A     |
| cg11830061 | 0.5703696 | -353.1397 | -0.3453491 | 0.9157187 | INSL6     |
| cg25013053 | 0.3518655 | -353.1397 | -0.3453273 | 0.6971928 | UNC45B    |
| cg21003606 | 0.5454174 | -353.1397 | -0.3446    | 0.8900174 | CALN1     |
| cg13019092 | 0.3896125 | -353.1397 | -0.343166  | 0.7327785 | PDZK1     |
| cg11154879 | 0.4521337 | -353.1397 | -0.3430554 | 0.7951891 | C20orf151 |
| cg03712237 | 0.4411383 | -353.1397 | -0.3428108 | 0.7839491 | SSX2      |
| cg08341924 | 0.4160888 | -353.1397 | -0.3422374 | 0.7583263 | TGM1      |
| cg22190114 | 0.3733314 | -353.1397 | -0.3420501 | 0.7153814 | NALP8     |
| cg04520391 | 0.4054843 | -353.1397 | -0.3417842 | 0.7472685 | PRB2      |
| cg21624282 | 0.45813   | -353.1397 | -0.3401066 | 0.7982366 | LOC122258 |
| cg26473272 | 0.527793  | -353.1397 | -0.339596  | 0.867389  | SYT8      |
| cg26093687 | 0.43224   | -353.1397 | -0.3395364 | 0.7717764 | EIF3S2    |
| cg24824840 | 0.4507549 | -353.1397 | -0.3393541 | 0.790109  | SHANK1    |
| cg08728865 | 0.4523108 | -353.1397 | -0.3393003 | 0.7916111 | NALP7     |
| cg12619162 | 0.4295629 | -353.1397 | -0.3390384 | 0.7686013 | FXYP4     |
| cg04132607 | 0.5202248 | -353.1397 | -0.3388996 | 0.8591244 | GATA5     |
| cg23514672 | 0.534259  | -353.1397 | -0.3384185 | 0.8726774 | FLJ32871  |
| cg16242770 | 0.4246746 | -353.1397 | -0.3375463 | 0.7622209 | KRTAP17-1 |
| cg02601403 | 0.4323477 | -353.1397 | -0.3370304 | 0.7693781 | TBC1D3C   |
| cg03534410 | 0.5252028 | -353.1397 | -0.3364601 | 0.8616629 | TMEM40    |
| cg11015241 | 0.5250095 | -353.1397 | -0.3360053 | 0.8610147 | ATP10A    |
| cg13453139 | 0.4159389 | -353.1397 | -0.3359694 | 0.7519083 | PIK3R5    |
| cg06270401 | 0.4288664 | -353.1397 | -0.3359692 | 0.7648356 | DYRK4     |
| cg01309153 | 0.5129861 | -353.1397 | -0.3354988 | 0.8484849 | SURF1     |
| cg23753610 | 0.5948404 | -353.1397 | -0.33535   | 0.9301904 | DNAHL1    |
| cg05440289 | 0.4204902 | -353.1397 | -0.3342112 | 0.7547014 | IVL       |
| cg25177139 | 0.4601569 | -353.1397 | -0.3335743 | 0.7937313 | SLC10A6   |
| cg13608094 | 0.5319676 | -353.1397 | -0.3321618 | 0.8641294 | CCND1     |
| cg18809535 | 0.5157196 | -353.1397 | -0.3292099 | 0.8449295 | LDHAL6B   |
| cg07595943 | 0.5892391 | -353.1397 | -0.3275534 | 0.9167925 | LOC161931 |
| cg02442161 | 0.4258407 | -353.1397 | -0.3272864 | 0.7531271 | PI3       |
| cg10129493 | 0.4263587 | -353.1397 | -0.3272278 | 0.7535865 | CD33      |
| cg16607065 | 0.4440067 | -353.1397 | -0.3259121 | 0.7699188 | TP73      |
| cg07792737 | 0.4879497 | -353.1397 | -0.3243666 | 0.8123163 | NPIP      |



|            |           |           |            |           |           |
|------------|-----------|-----------|------------|-----------|-----------|
| cg21399079 | 0.5492972 | -353.1397 | -0.3242197 | 0.8735169 | GPR45     |
| cg21407055 | 0.4678544 | -353.1397 | -0.3189175 | 0.7867719 | ART1      |
| cg04450876 | 0.4658791 | -353.1397 | -0.3187135 | 0.7845926 | FAM112B   |
| cg26813458 | 0.5464146 | -353.1397 | -0.3186429 | 0.8650575 | CEACAM6   |
| cg07506795 | 0.5561472 | -353.1397 | -0.3170552 | 0.8732024 | ZNF19     |
| cg24908058 | 0.5238456 | -353.1397 | -0.3169711 | 0.8408167 | CGB5      |
| cg15627025 | 0.5392129 | -353.1397 | -0.3168082 | 0.8560211 | KIR3DL1   |
| cg24407065 | 0.4867082 | -353.1397 | -0.3165575 | 0.8032658 | BLZF1     |
| cg00601486 | 0.5768236 | -353.1397 | -0.3159121 | 0.8927357 | H1T2      |
| cg09691574 | 0.4869934 | -353.1397 | -0.3140952 | 0.8010886 | MRGPRX4   |
| cg18508525 | 0.4977302 | -353.1397 | -0.3140223 | 0.8117525 | CD36      |
| cg10334928 | 0.5186656 | -353.1397 | -0.3123267 | 0.8309923 | STON2     |
| cg22013966 | 0.5295085 | -353.1397 | -0.3114766 | 0.8409851 | SERPINA13 |
| cg18231267 | 0.5728946 | -353.1397 | -0.3110847 | 0.8839793 | RUNX3     |
| cg17894008 | 0.5097622 | -353.1397 | -0.3092588 | 0.819021  | NACAL     |
| cg27212977 | 0.52693   | -353.1397 | -0.307945  | 0.8348749 | DEFA6     |
| cg08124722 | 0.5340626 | -353.1397 | -0.3069769 | 0.8410395 | CCL7      |
| cg13181284 | 0.5355783 | -353.1397 | -0.3062599 | 0.8418382 | KRT6B     |
| cg12040555 | 0.5880759 | -353.1397 | -0.3044289 | 0.8925049 | MGMT      |
| cg22218909 | 0.5605991 | -353.1397 | -0.3032817 | 0.8638808 | DEFA3     |
| cg09508556 | 0.560279  | -353.1397 | -0.3009647 | 0.8612437 | PSORS1C2  |
| cg16016036 | 0.5311612 | -353.1397 | -0.3007822 | 0.8319434 | TPO       |
| cg00152644 | 0.520776  | -353.1397 | -0.3004503 | 0.8212262 | SPRR2E    |
| cg20543571 | 0.5406709 | -353.1397 | -0.3002366 | 0.8409076 | C15orf43  |
| cg00269932 | 0.5978572 | -353.1397 | -0.2987723 | 0.8966295 | LAIR2     |
| cg22039846 | 0.5580025 | -353.1397 | -0.2975183 | 0.8555208 | KIR2DL1   |
| cg22899145 | 0.6054332 | -353.1397 | -0.2968296 | 0.9022628 | OPN1LW    |
| cg13696012 | 0.5802678 | -353.1397 | -0.2959633 | 0.8762311 | BPIL1     |
| cg15096123 | 0.558532  | -353.1397 | -0.2959414 | 0.8544734 | KLK4      |
| cg06001166 | 0.5272968 | -353.1397 | -0.2957852 | 0.8230821 | RPL3L     |
| cg10938286 | 0.5493305 | -353.1397 | -0.2955545 | 0.844885  | CST2      |
| cg14297029 | 0.5492567 | -353.1397 | -0.2924601 | 0.8417169 | SSTR3     |
| cg25813714 | 0.5518429 | -353.1397 | -0.2917507 | 0.8435937 | CYP4F12   |
| cg09750183 | 0.5904374 | -353.1397 | -0.2885401 | 0.8789775 | PGA5      |
| cg20676303 | 0.5913581 | -353.1397 | -0.2879422 | 0.8793003 | GAGE7B    |
| cg27341860 | 0.6057094 | -353.1397 | -0.2856816 | 0.891391  | OR2L13    |
| cg25087423 | 0.6271483 | -353.1397 | -0.282452  | 0.9096003 | BLR1      |
| cg02910574 | 0.6158151 | -353.1397 | -0.2799762 | 0.8957913 | PCOLN3    |
| cg25514503 | 0.6119118 | -353.1397 | -0.2778454 | 0.8897572 | PER3      |
| cg05564657 | 0.6042902 | -353.1397 | -0.2759038 | 0.880194  | AADAC     |
| cg03846767 | 0.6211254 | -353.1397 | -0.2753859 | 0.8965113 | TP73      |
| cg14893129 | 0.5989105 | -353.1397 | -0.2753411 | 0.8742516 | CARD14    |
| cg09283007 | 0.6349209 | -353.1397 | -0.269445  | 0.9043659 | FAM47B    |
| cg08742106 | 0.6171443 | -353.1397 | -0.2673165 | 0.8844607 | USP6      |
| cg05384917 | 0.6365483 | -353.1397 | -0.2669822 | 0.9035305 | GPR109B   |

|            |            |           |            |           |           |
|------------|------------|-----------|------------|-----------|-----------|
| cg25651984 | 0.6182711  | -353.1397 | -0.2657937 | 0.8840648 | MAGEC1    |
| cg07339327 | 0.6387529  | -353.1397 | -0.2651809 | 0.9039338 | CCND1     |
| cg11360149 | 0.6490521  | -353.1397 | -0.2615538 | 0.9106058 | OR2V2     |
| cg19971655 | 0.6335066  | -353.1397 | -0.2614112 | 0.8949178 | BSND      |
| cg27360282 | 0.6452697  | -353.1397 | -0.2583929 | 0.9036626 | RUNX3     |
| cg18604842 | 0.6423548  | -353.1397 | -0.2542655 | 0.8966204 | FLJ36046  |
| cg21643045 | 0.6408277  | -353.1397 | -0.2514121 | 0.8922398 | CCL20     |
| cg10719920 | 0.6436859  | -353.1397 | -0.251214  | 0.8948999 | C21orf93  |
| cg14365123 | 0.663397   | -353.1397 | -0.245508  | 0.9089049 | ARPM2     |
| cg15772361 | 0.6733456  | -353.1397 | -0.243422  | 0.9167676 | SERPINB3  |
| cg20059312 | 0.6725587  | -353.1397 | -0.2416248 | 0.9141835 | NGEF      |
| cg14645650 | 0.7042676  | -353.1397 | -0.2349712 | 0.9392388 | RUNX3     |
| cg26750319 | 0.7266508  | -353.1397 | -0.2326446 | 0.9592954 | KCNQ1     |
| cg07432969 | 0.6949706  | -353.1397 | -0.2265293 | 0.9214999 | GPR35     |
| cg26208930 | 0.7213792  | -353.1397 | -0.2241257 | 0.9455049 | TP73      |
| cg16825643 | 0.7154665  | -353.1397 | -0.2219012 | 0.9373677 | FAM38A    |
| cg20483763 | 0.7375296  | -353.1397 | -0.2145904 | 0.9521199 | CABP4     |
| cg17240454 | 0.4926659  | -353.0258 | -0.3072956 | 0.7999614 | SPDEF     |
| cg05800321 | 0.5403467  | -352.7386 | -0.290791  | 0.8311377 | LY6D      |
| cg14894144 | 0.1265585  | -352.5416 | -0.3528954 | 0.479454  | LAMA3     |
| cg02130905 | 0.2502714  | -350.8302 | -0.3565199 | 0.6067913 | STMN4     |
| cg06233503 | 0.2064612  | -349.7787 | -0.3575443 | 0.5640055 | KCNQ1     |
| cg01731341 | 0.4842712  | -349.7325 | -0.3090011 | 0.7932723 | FGF6      |
| cg18729973 | 0.4181969  | -348.782  | -0.32763   | 0.7458268 | TFF1      |
| cg03544379 | 0.1396938  | -348.148  | -0.3526261 | 0.4923198 | OR7C2     |
| cg22627427 | 0.5648825  | -347.5702 | -0.2802464 | 0.8451289 | C11orf9   |
| cg02423618 | 0.2356898  | -347.2813 | -0.3558266 | 0.5915165 | SPATA8    |
| cg20311730 | 0.2751103  | -347.1521 | -0.352964  | 0.6280743 | NALP10    |
| cg18986165 | 0.4912712  | -346.9534 | -0.3059312 | 0.7972023 | SIGLEC12  |
| cg11750883 | 0.203096   | -346.7798 | -0.3561811 | 0.5592771 | C1orf42   |
| cg09448880 | 0.2874843  | -346.764  | -0.3514891 | 0.6389734 | PGLYRP3   |
| cg02723372 | 0.4855635  | -346.3501 | -0.3075585 | 0.793122  | RUNX3     |
| cg03264414 | 0.5583675  | -346.3462 | -0.2823683 | 0.8407358 | PAEP      |
| cg26583078 | 0.3131535  | -346.224  | -0.3479506 | 0.6611041 | SORBS2    |
| cg27050793 | 0.5784721  | -345.3047 | -0.2743818 | 0.8528539 | SBSN      |
| cg27090216 | 0.03628109 | -344.4484 | -0.3218093 | 0.3580904 | TNFRSF10C |
| cg05248781 | 0.5602388  | -344.0608 | -0.2810424 | 0.8412812 | LCE5A     |
| cg19787037 | 0.1942855  | -343.351  | -0.35447   | 0.5487555 | SPAG11    |
| cg01469547 | 0.5122277  | -343.0413 | -0.2978686 | 0.8100963 | OR5P3     |
| cg03931808 | 0.6384987  | -341.1724 | -0.2485366 | 0.8870353 | RLN3      |
| cg15484375 | 0.3750719  | -341.0395 | -0.3350037 | 0.7100756 | SAA1      |
| cg26306976 | 0.5653939  | -340.7834 | -0.2782051 | 0.843599  | ITGB1BP1  |
| cg03468463 | 0.2980134  | -340.6226 | -0.3477878 | 0.6458012 | SERPINB12 |
| cg04574507 | 0.301855   | -340.0353 | -0.3470714 | 0.6489264 | CD1B      |
| cg10052840 | 0.1459826  | -339.5224 | -0.3491424 | 0.4951251 | SEMA6B    |

|            |           |           |            |           |          |
|------------|-----------|-----------|------------|-----------|----------|
| cg09546307 | 0.3321069 | -339.0651 | -0.3422896 | 0.6743965 | CLEC4D   |
| cg07339138 | 0.2221162 | -335.8798 | -0.3512369 | 0.5733532 | CCDC13   |
| cg27496506 | 0.4476597 | -335.8798 | -0.315497  | 0.7631567 | TGM5     |
| cg10127415 | 0.1761027 | -335.8208 | -0.3501468 | 0.5262495 | MAGEB6   |
| cg08477744 | 0.5888508 | -335.6369 | -0.2677497 | 0.8566005 | MFAP2    |
| cg19728223 | 0.1877859 | -335.4621 | -0.3505927 | 0.5383787 | KCNQ1    |
| cg00626119 | 0.1862851 | -335.4266 | -0.3505014 | 0.5367865 | NTRK1    |
| cg27065979 | 0.5099916 | -335.4266 | -0.2963477 | 0.8063393 | NEK3     |
| cg22194129 | 0.2387454 | -335.2111 | -0.350453  | 0.5891984 | CLEC4C   |
| cg20751395 | 0.5783061 | -335.0291 | -0.2716953 | 0.8500014 | KCNQ1    |
| cg10071275 | 0.2299695 | -334.8189 | -0.350571  | 0.5805405 | MYT1     |
| cg21148892 | 0.3727474 | -334.674  | -0.3331596 | 0.705907  | CLEC4F   |
| cg23260026 | 0.158566  | -333.917  | -0.34776   | 0.506326  | FSTL3    |
| cg06403553 | 0.4874102 | -333.5167 | -0.3030075 | 0.7904177 | PGK2     |
| cg03752885 | 0.1761474 | -333.4886 | -0.3490007 | 0.5251481 | DAPK3    |
| cg08495878 | 0.6032762 | -333.0081 | -0.2612755 | 0.8645517 | SERPINA4 |
| cg15823100 | 0.5861913 | -332.3417 | -0.2678993 | 0.8540906 | PISD     |
| cg04953015 | 0.3836903 | -332.2814 | -0.3299889 | 0.7136792 | CHRNA2   |
| cg19623751 | 0.269946  | -331.7565 | -0.3470205 | 0.6169665 | CEACAM7  |
| cg14162076 | 0.5474698 | -331.7491 | -0.2822836 | 0.8297534 | CLEC4D   |
| cg00321478 | 0.314736  | -331.0704 | -0.3417609 | 0.6564969 | CRB1     |
| cg14740251 | 0.3571407 | -330.949  | -0.3348112 | 0.6919519 | SIGLEC5  |
| cg19233472 | 0.3954623 | -330.9107 | -0.3268924 | 0.7223547 | FOXI1    |
| cg12339029 | 0.4008183 | -330.9107 | -0.32567   | 0.7264883 | MYL1     |
| cg13397379 | 0.2970143 | -330.729  | -0.3438739 | 0.6408883 | OR2C3    |
| cg12970084 | 0.340134  | -330.7284 | -0.337722  | 0.677856  | ELF3     |
| cg27442349 | 0.288689  | -330.0425 | -0.3445156 | 0.6332046 | NFKBIB   |
| cg23114594 | 0.3792172 | -329.4581 | -0.3298862 | 0.7091034 | C10orf30 |
| cg05921699 | 0.2894349 | -329.0247 | -0.3440132 | 0.6334482 | CD79A    |
| cg17142134 | 0.5822421 | -328.7969 | -0.2684582 | 0.8507003 | SLC2A2   |
| cg19712821 | 0.2188378 | -328.7054 | -0.3479607 | 0.5667985 | KSP37    |
| cg17981339 | 0.4541289 | -328.4109 | -0.3111713 | 0.7653002 | SBEM     |
| cg14519000 | 0.6265342 | -327.3362 | -0.2502124 | 0.8767466 | GATA5    |
| cg23829949 | 0.2344383 | -327.1583 | -0.3469852 | 0.5814235 | ZNF238   |
| cg00334507 | 0.2804125 | -326.5976 | -0.3438905 | 0.6243029 | MVP      |
| cg14902389 | 0.3972699 | -326.1091 | -0.3247434 | 0.7220133 | MGAT4A   |
| cg19584957 | 0.6829803 | -325.7143 | -0.2249513 | 0.9079316 | TTLL10   |
| cg13180098 | 0.3009604 | -324.9408 | -0.3410186 | 0.641979  | RHO      |
| cg05055150 | 0.415839  | -324.722  | -0.3199046 | 0.7357436 | MAG      |
| cg09837648 | 0.6105359 | -324.4493 | -0.2560717 | 0.8666076 | PLXNB1   |
| cg18223379 | 0.1749816 | -324.1272 | -0.3443228 | 0.5193044 | BPIL3    |
| cg24363955 | 0.4848307 | -323.955  | -0.3007347 | 0.7855654 | FLJ14054 |
| cg14826683 | 0.1957523 | -323.0161 | -0.3449351 | 0.5406874 | SPRR2D   |
| cg05700681 | 0.4927325 | -322.9175 | -0.29797   | 0.7907025 | CCL22    |
| cg24691255 | 0.5412006 | -322.7146 | -0.2818553 | 0.823056  | SERPINB2 |

|            |           |           |            |           |           |
|------------|-----------|-----------|------------|-----------|-----------|
| cg00463202 | 0.4638954 | -321.3355 | -0.3060501 | 0.7699456 | ADPRHL1   |
| cg18979223 | 0.3244635 | -320.5774 | -0.3361379 | 0.6606013 | CDKN2B    |
| cg05423257 | 0.6857328 | -320.4113 | -0.2224702 | 0.908203  | ALPI      |
| cg15210427 | 0.1727947 | -319.8676 | -0.3420376 | 0.5148324 | CST9L     |
| cg18129786 | 0.5226234 | -319.4687 | -0.2872437 | 0.8098671 | ZNF445    |
| cg10275770 | 0.1081539 | -319.4328 | -0.331901  | 0.4400549 | ICAM2     |
| cg02064402 | 0.4098586 | -319.2558 | -0.3193596 | 0.7292182 | SLC6A18   |
| cg00895324 | 0.3805142 | -318.5893 | -0.3255474 | 0.7060616 | PCP4      |
| cg24607398 | 0.1800867 | -318.1659 | -0.3417326 | 0.5218193 | MLH1      |
| cg08878744 | 0.1742053 | -317.8564 | -0.3411322 | 0.5153375 | LCE1B     |
| cg11719283 | 0.3234318 | -317.8564 | -0.335165  | 0.6585968 | ZNF574    |
| cg05912121 | 0.3252504 | -317.4857 | -0.3347519 | 0.6600023 | TH        |
| cg15905124 | 0.4675464 | -317.3112 | -0.3036449 | 0.7711913 | MGC13034  |
| cg15903395 | 0.3195446 | -317.2043 | -0.3354305 | 0.6549752 | FLJ25369  |
| cg03557698 | 0.6188056 | -315.7769 | -0.2504069 | 0.8692125 | C1orf177  |
| cg13758677 | 0.4383389 | -315.6474 | -0.3110402 | 0.7493791 | GAGE4     |
| cg15439078 | 0.6035519 | -315.6261 | -0.2565032 | 0.8600551 | MYL3      |
| cg22988566 | 0.5251462 | -315.2609 | -0.2850862 | 0.8102324 | WFDC10B   |
| cg21522797 | 0.5678004 | -314.9108 | -0.2699828 | 0.8377832 | PLCG2     |
| cg13960126 | 0.3049195 | -314.8607 | -0.3363082 | 0.6412276 | CRB3      |
| cg00392257 | 0.2628223 | -314.8342 | -0.3401129 | 0.6029352 | ISG20L2   |
| cg04488758 | 0.3283681 | -314.8342 | -0.3331997 | 0.6615677 | USP44     |
| cg08420900 | 0.6008282 | -314.4862 | -0.2572598 | 0.858088  | LW-1      |
| cg16964535 | 0.6908345 | -314.2189 | -0.2186796 | 0.9095141 | DNAJC5G   |
| cg03309967 | 0.2776801 | -314.0094 | -0.3386615 | 0.6163416 | PSENNEN   |
| cg04567009 | 0.2518233 | -313.9023 | -0.3402848 | 0.5921081 | FCGR3B    |
| cg20283107 | 0.242698  | -313.8516 | -0.3406222 | 0.5833201 | FAM91A1   |
| cg03291145 | 0.3091391 | -313.7477 | -0.3353117 | 0.6444508 | ARSF      |
| cg05275605 | 0.6694773 | -313.4337 | -0.2281652 | 0.8976426 | C21orf123 |
| cg16175725 | 0.5128466 | -312.9989 | -0.288399  | 0.8012456 | TCF1      |
| cg07123548 | 0.5365896 | -312.9365 | -0.2804736 | 0.8170632 | HIPK4     |
| cg06811800 | 0.3456815 | -312.7293 | -0.329643  | 0.6753246 | ATP4B     |
| cg14120879 | 0.4472553 | -312.6633 | -0.3076191 | 0.7548744 | DEFB105A  |
| cg09207718 | 0.22655   | -312.6202 | -0.3403614 | 0.5669113 | CYP1A2    |
| cg01255591 | 0.5382189 | -312.5575 | -0.2797902 | 0.8180091 | R3HDML    |
| cg02351381 | 0.1315371 | -312.1647 | -0.3326574 | 0.4641945 | C12orf34  |
| cg18389810 | 0.5750351 | -312.0031 | -0.26643   | 0.8414651 | C14orf8   |
| cg01442426 | 0.466824  | -311.8608 | -0.3019623 | 0.7687863 | XCR1      |
| cg15531099 | 0.1968501 | -311.7158 | -0.339404  | 0.5362542 | LCE1D     |
| cg25915982 | 0.4769036 | -311.5663 | -0.2989625 | 0.7758661 | GRB10     |
| cg05615150 | 0.3974414 | -311.5421 | -0.3192534 | 0.7166948 | ARPP-21   |
| cg15975283 | 0.4293278 | -311.4532 | -0.3117801 | 0.7411079 | SLC9A11   |
| cg19006008 | 0.3025199 | -310.4956 | -0.3346729 | 0.6371928 | F2RL3     |
| cg04810997 | 0.3421519 | -310.4956 | -0.3292838 | 0.6714357 | TAS2R60   |
| cg18241647 | 0.5061952 | -309.6785 | -0.2894352 | 0.7956304 | WFDC12    |

|            |           |           |            |           |           |
|------------|-----------|-----------|------------|-----------|-----------|
| cg12188860 | 0.6006603 | -309.5129 | -0.2559221 | 0.8565824 | TOP1MT    |
| cg27418851 | 0.3284767 | -309.0108 | -0.3307337 | 0.6592104 | MBL2      |
| cg24678320 | 0.6430327 | -308.8274 | -0.2384765 | 0.8815092 | FLJ38451  |
| cg26581729 | 0.1236362 | -308.2489 | -0.3289911 | 0.4526273 | NPDC1     |
| cg24949488 | 0.3454688 | -307.887  | -0.3276871 | 0.6731559 | DNTT      |
| cg02903525 | 0.4677341 | -307.7752 | -0.300289  | 0.7680231 | C5AR1     |
| cg09458237 | 0.3717023 | -306.6064 | -0.3225797 | 0.694282  | HSPA12B   |
| cg24506604 | 0.3870794 | -306.239  | -0.3194098 | 0.7064892 | LOC144501 |
| cg00350478 | 0.2690348 | -305.9206 | -0.3356438 | 0.6046786 | FRMD1     |
| cg09044738 | 0.5255961 | -305.7608 | -0.2819049 | 0.807501  | FAM12A    |
| cg25710140 | 0.3681616 | -304.72   | -0.3224895 | 0.6906511 | MID1      |
| cg04705866 | 0.3723494 | -304.1432 | -0.3214805 | 0.6938299 | GZMK      |
| cg22506059 | 0.5863695 | -304.0774 | -0.2598734 | 0.8462428 | CARD10    |
| cg16673198 | 0.3060345 | -304.0511 | -0.3314861 | 0.6375206 | CPNE4     |
| cg12022621 | 0.2150075 | -303.1851 | -0.3357317 | 0.5507392 | LAX1      |
| cg03782727 | 0.601393  | -303.0601 | -0.2538226 | 0.8552155 | FFAR1     |
| cg21450627 | 0.5392098 | -302.9344 | -0.2764489 | 0.8156587 | PSD4      |
| cg06094150 | 0.5004902 | -302.5623 | -0.2888629 | 0.7893532 | MT1B      |
| cg08887581 | 0.3761463 | -302.5563 | -0.3201171 | 0.6962634 | C1orf64   |
| cg05822532 | 0.2057033 | -301.8447 | -0.3348199 | 0.5405232 | ELN       |
| cg14934821 | 0.5455812 | -301.6287 | -0.2738581 | 0.8194393 | GPSM1     |
| cg01072821 | 0.2970113 | -301.5843 | -0.3313552 | 0.6283666 | UNQ9391   |
| cg06958211 | 0.2635019 | -301.3344 | -0.3338595 | 0.5973614 | PAK6      |
| cg10248727 | 0.5323788 | -301.3258 | -0.2782302 | 0.810609  | LCN1      |
| cg08603768 | 0.328837  | -300.8905 | -0.3272447 | 0.6560817 | WNT8A     |
| cg21256656 | 0.3975263 | -299.9553 | -0.3147785 | 0.7123048 | KLK6      |
| cg19917856 | 0.1806572 | -299.5529 | -0.3321985 | 0.5128558 | LOC342897 |
| cg23278885 | 0.3886291 | -299.5529 | -0.316459  | 0.7050881 | TGM6      |
| cg24841244 | 0.4134916 | -299.4522 | -0.3110696 | 0.7245612 | CD3D      |
| cg10190509 | 0.4806731 | -299.3223 | -0.2936506 | 0.7743237 | CCL16     |
| cg00057593 | 0.2399878 | -299.318  | -0.3337769 | 0.5737647 | GML       |
| cg04484789 | 0.4384841 | -298.7927 | -0.3048444 | 0.7433285 | KRT25B    |
| cg24443136 | 0.6907479 | -298.752  | -0.2150425 | 0.9057904 | ATP2B3    |
| cg11070419 | 0.2146902 | -298.417  | -0.3333231 | 0.5480133 | C4BPA     |
| cg09864990 | 0.5109174 | -298.3633 | -0.2841962 | 0.7951136 | GATA5     |
| cg14264994 | 0.6314825 | -298.3633 | -0.2404914 | 0.8719739 | CTCFL     |
| cg26136776 | 0.4742827 | -298.1844 | -0.2950645 | 0.7693472 | KLF1      |
| cg15113803 | 0.6400504 | -298.1844 | -0.236908  | 0.8769584 | RHO       |
| cg05671018 | 0.3579564 | -297.7798 | -0.3214256 | 0.679382  | LYSMD2    |
| cg18967533 | 0.2067425 | -297.4105 | -0.3325795 | 0.539322  | KLK6      |
| cg03860768 | 0.3169232 | -296.7597 | -0.3269832 | 0.6439065 | BLK       |
| cg02882813 | 0.4696093 | -296.6651 | -0.295835  | 0.7654443 | CST5      |
| cg20312687 | 0.2909363 | -296.5975 | -0.3296559 | 0.6205922 | DEFB118   |
| cg06145357 | 0.3597003 | -296.3667 | -0.3205391 | 0.6802394 | MAGEA8    |
| cg00594952 | 0.2325984 | -296.2392 | -0.3323536 | 0.564952  | RIMS3     |

|            |            |           |            |           |          |
|------------|------------|-----------|------------|-----------|----------|
| cg27020690 | 0.05353852 | -296.0718 | -0.2996553 | 0.3531938 | TERC     |
| cg06277277 | 0.1576904  | -296.0501 | -0.3278572 | 0.4855476 | NR1I3    |
| cg04254119 | 0.5455532  | -295.8837 | -0.2720215 | 0.8175747 | AKAP3    |
| cg22407504 | 0.5680591  | -295.383  | -0.2639861 | 0.8320452 | MUC5B    |
| cg24857545 | 0.3572976  | -295.2897 | -0.3204865 | 0.6777841 | GDI1     |
| cg12385643 | 0.5618991  | -294.8    | -0.266     | 0.8278991 | UGT1A6   |
| cg19042947 | 0.3120283  | -294.7924 | -0.3266751 | 0.6387034 | SERPINA4 |
| cg24331162 | 0.4030116  | -294.5627 | -0.3114519 | 0.7144635 | SYT8     |
| cg25659818 | 0.2445192  | -293.69   | -0.3309232 | 0.5754424 | CCL4     |
| cg19982860 | 0.3023203  | -293.5112 | -0.3271554 | 0.6294757 | IFNA21   |
| cg17667972 | 0.5696692  | -292.9973 | -0.2626728 | 0.832342  | KRT4     |
| cg09237521 | 0.6273773  | -292.7566 | -0.2406039 | 0.8679812 | IFITM2   |
| cg07484827 | 0.1729667  | -292.6528 | -0.3277871 | 0.5007538 | CHRNA10  |
| cg21130124 | 0.5627694  | -292.5722 | -0.2649939 | 0.8277633 | CALML5   |
| cg07967308 | 0.3028381  | -292.4249 | -0.3266046 | 0.6294427 | ACP5     |
| cg10503138 | 0.4134004  | -292.3277 | -0.3082967 | 0.7216971 | CNTN4    |
| cg24477636 | 0.2319348  | -292.0056 | -0.3302434 | 0.5621782 | OR10H1   |
| cg18434152 | 0.3723929  | -291.8256 | -0.3164029 | 0.6887958 | PROK1    |
| cg08292050 | 0.4618224  | -291.6512 | -0.2961271 | 0.7579495 | SOCS4    |
| cg02192965 | 0.3745389  | -291.6498 | -0.3159341 | 0.690473  | SLC3A1   |
| cg00367281 | 0.3088431  | -290.6748 | -0.3251774 | 0.6340206 | CHRN3    |
| cg26353877 | 0.4563722  | -290.653  | -0.2972056 | 0.7535778 | APCS     |
| cg14107638 | 0.3579342  | -290.5877 | -0.3183873 | 0.6763214 | MAGEA5   |
| cg21038703 | 0.3360829  | -290.3551 | -0.3216308 | 0.6577138 | ASB16    |
| cg15983538 | 0.4461034  | -290.3238 | -0.2997256 | 0.745829  | SEMA4A   |
| cg16739580 | 0.3078104  | -290.19   | -0.3250579 | 0.6328683 | POP2     |
| cg14911395 | 0.1477637  | -290.181  | -0.3231452 | 0.4709089 | SEMA3B   |
| cg03886110 | 0.3517158  | -289.8704 | -0.3190781 | 0.6707939 | PECAM1   |
| cg13726463 | 0.4360323  | -289.8394 | -0.3020359 | 0.7380682 | COX6A2   |
| cg26809968 | 0.5556958  | -289.7321 | -0.2665536 | 0.8222495 | OPN1LW   |
| cg27394486 | 0.5239003  | -289.0362 | -0.276921  | 0.8008213 | C15orf2  |
| cg19949550 | 0.4376332  | -288.6436 | -0.3011898 | 0.7388231 | ASB2     |
| cg00896220 | 0.3936315  | -288.3469 | -0.3108932 | 0.7045248 | CCL4L2   |
| cg16101800 | 0.42624    | -287.8733 | -0.3036138 | 0.7298539 | PCK1     |
| cg01204985 | 0.4609945  | -287.8498 | -0.2949347 | 0.7559292 | LILRA4   |
| cg19226099 | 0.2253562  | -287.5638 | -0.3279587 | 0.5533149 | MC3R     |
| cg14338548 | 0.5921156  | -287.1561 | -0.2526509 | 0.8447666 | LALBA    |
| cg15996947 | 0.292749   | -286.6937 | -0.3248956 | 0.6176445 | L2HGDH   |
| cg09467501 | 0.07122152 | -286.5387 | -0.3008916 | 0.3721131 | PYY      |
| cg22456522 | 0.1219951  | -286.3629 | -0.3160372 | 0.4380323 | LILRB3   |
| cg01413516 | 0.5240042  | -286.2322 | -0.2759372 | 0.7999414 | INSL3    |
| cg01643624 | 0.4229245  | -286.156  | -0.3037005 | 0.726625  | C11orf16 |
| cg04962134 | 0.2741401  | -285.9575 | -0.3259009 | 0.600041  | TRIM51   |
| cg01484156 | 0.2232     | -285.6108 | -0.3269247 | 0.5501247 | NCALD    |
| cg25193494 | 0.2821836  | -285.2482 | -0.3250339 | 0.6072175 | FLJ20186 |

|            |           |           |            |           |           |
|------------|-----------|-----------|------------|-----------|-----------|
| cg14179628 | 0.3172815 | -285.0804 | -0.3216713 | 0.6389529 | TCEAL7    |
| cg19111262 | 0.1985641 | -284.4666 | -0.325417  | 0.5239811 | IGSF9     |
| cg07597976 | 0.2594008 | -284.4331 | -0.3258935 | 0.5852943 | CD19      |
| cg13601079 | 0.4812854 | -283.4394 | -0.2877685 | 0.7690538 | SSX3      |
| cg00756887 | 0.3727656 | -283.1886 | -0.3126954 | 0.685461  | PVRL4     |
| cg15303841 | 0.2768767 | -282.8339 | -0.3242328 | 0.6011094 | RFPL1     |
| cg05093686 | 0.1563824 | -282.7733 | -0.3202585 | 0.4766409 | MAB21L1   |
| cg12951282 | 0.2872549 | -282.1524 | -0.3231899 | 0.6104448 | ASGR2     |
| cg06090864 | 0.63332   | -282.0502 | -0.2351785 | 0.8684985 | FFAR1     |
| cg01119135 | 0.6506495 | -281.7461 | -0.228022  | 0.8786716 | C1orf116  |
| cg26822241 | 0.3888538 | -281.7045 | -0.3090876 | 0.6979414 | CYP2C9    |
| cg01726767 | 0.2963167 | -281.6501 | -0.3222054 | 0.6185221 | LALBA     |
| cg00412805 | 0.6614091 | -281.5157 | -0.2234551 | 0.8848642 | KBTBD5    |
| cg15485859 | 0.4345184 | -281.4644 | -0.2991429 | 0.7336613 | C1orf116  |
| cg25552889 | 0.5143903 | -281.4022 | -0.2772759 | 0.7916662 | C3orf40   |
| cg24818418 | 0.6178559 | -280.986  | -0.2409822 | 0.8588381 | EGF       |
| cg18063149 | 0.3798459 | -280.8559 | -0.3104149 | 0.6902608 | FMO3      |
| cg12067261 | 0.4939349 | -280.783  | -0.2831749 | 0.7771097 | INSL4     |
| cg23873703 | 0.4977478 | -280.4895 | -0.2819558 | 0.7797037 | KCNAB1    |
| cg10848367 | 0.3371355 | -280.4496 | -0.3170646 | 0.6542001 | SCGB1D2   |
| cg07525077 | 0.249778  | -280.3332 | -0.3241291 | 0.5739071 | RNASE3    |
| cg22247240 | 0.2866    | -280.2397 | -0.3222989 | 0.6088988 | C14orf115 |
| cg21094154 | 0.4152481 | -280.1492 | -0.302999  | 0.7182471 | TNFSF11   |
| cg13733733 | 0.2635436 | -280.0541 | -0.3235411 | 0.5870848 | LILRA3    |
| cg20551517 | 0.4698443 | -279.9203 | -0.2895853 | 0.7594296 | GIP       |
| cg00603172 | 0.452023  | -279.8592 | -0.2942094 | 0.7462324 | BOK       |
| cg20657421 | 0.4253808 | -279.8186 | -0.3005974 | 0.7259783 | CCL4      |
| cg15447486 | 0.3951218 | -279.5107 | -0.3069197 | 0.7020414 | GPR109B   |
| cg23444894 | 0.447749  | -279.2525 | -0.2950413 | 0.7427903 | UNQ5810   |
| cg27132814 | 0.2732683 | -279.1901 | -0.3226308 | 0.5958991 | C20orf79  |
| cg17446142 | 0.464728  | -279.0681 | -0.2906166 | 0.7553446 | GDF9      |
| cg02537838 | 0.5247844 | -278.6814 | -0.2730695 | 0.7978539 | C20orf151 |
| cg05254747 | 0.4448709 | -277.0305 | -0.2948926 | 0.7397634 | SLC39A14  |
| cg05636175 | 0.120219  | -276.8831 | -0.3099307 | 0.4301497 | TNFRSF10C |
| cg12683641 | 0.6052139 | -276.8566 | -0.2445847 | 0.8497986 | KLK14     |
| cg10853416 | 0.4022907 | -276.7757 | -0.3043402 | 0.7066309 | MS4A7     |
| cg06539449 | 0.4444254 | -276.7246 | -0.2948739 | 0.7392992 | CCND1     |
| cg23471482 | 0.5107865 | -276.1992 | -0.2765223 | 0.7873088 | CCL22     |
| cg00534856 | 0.6739477 | -275.8404 | -0.2165903 | 0.890538  | CGB       |
| cg23988567 | 0.4811639 | -275.452  | -0.2848222 | 0.7659861 |           |
| cg02737335 | 0.4061463 | -275.3507 | -0.3029554 | 0.7091017 | ARHGEF16  |
| cg06303238 | 0.337617  | -275.2273 | -0.3146165 | 0.6522335 | SALL4     |
| cg19875656 | 0.5177253 | -275.2273 | -0.2740592 | 0.7917845 | TSP50     |
| cg11435943 | 0.1990275 | -274.7951 | -0.3201871 | 0.5192146 | SERPINB12 |
| cg22220722 | 0.4920937 | -274.554  | -0.2814138 | 0.7735075 | PLA2G2A   |

|            |            |           |            |           |          |
|------------|------------|-----------|------------|-----------|----------|
| cg16379513 | 0.6262316  | -274.3281 | -0.2357324 | 0.861964  | TSSK3    |
| cg08555657 | 0.4531764  | -274.2628 | -0.2917395 | 0.7449159 | SPRR2E   |
| cg10705251 | 0.6221677  | -274.1646 | -0.2372684 | 0.8594362 | ZNF683   |
| cg16358738 | 0.4265771  | -273.7511 | -0.2978731 | 0.7244502 | AGXT     |
| cg12858514 | 0.6637642  | -273.5866 | -0.2202896 | 0.8840538 | PADI3    |
| cg00501366 | 0.2690464  | -273.3433 | -0.3199412 | 0.5889876 | ALOX12B  |
| cg11845202 | 0.5768731  | -273.3233 | -0.2538339 | 0.830707  | K5B      |
| cg19764418 | 0.2432153  | -273.2296 | -0.3205677 | 0.563783  | RYR2     |
| cg01772980 | 0.3067942  | -273.168  | -0.3171766 | 0.6239709 | SCGB1D1  |
| cg14845091 | 0.3082397  | -271.8687 | -0.3164243 | 0.624664  | ADPRHL1  |
| cg12113132 | 0.2278408  | -271.8079 | -0.3197479 | 0.5475886 | CCNDBP1  |
| cg15060813 | 0.1915449  | -271.6338 | -0.3178824 | 0.5094273 | LRFN3    |
| cg07728874 | 0.5631549  | -271.5239 | -0.2580142 | 0.8211691 | CD3D     |
| cg12850636 | 0.4158088  | -271.1644 | -0.2991675 | 0.7149763 | TJP3     |
| cg20584011 | 0.5579782  | -270.9345 | -0.2595768 | 0.817555  | ZDHHC11  |
| cg10490064 | 0.416858   | -270.882  | -0.2988228 | 0.7156807 | CRYBB2   |
| cg13694749 | 0.3781838  | -270.8791 | -0.3063736 | 0.6845574 | SCN4A    |
| cg04740359 | 0.1738479  | -270.541  | -0.3155118 | 0.4893597 | NTF3     |
| cg17687962 | 0.4452374  | -270.1197 | -0.2920408 | 0.7372782 | KLK3     |
| cg22228134 | 0.2625904  | -269.9321 | -0.3184589 | 0.5810493 | GZMH     |
| cg06946880 | 0.4159466  | -269.7504 | -0.2985435 | 0.7144901 | ATP6V1B1 |
| cg06142324 | 0.3199995  | -269.6158 | -0.3141266 | 0.634126  | FLJ25530 |
| cg20011352 | 0.06655951 | -269.5324 | -0.2878631 | 0.3544226 | GPR124   |
| cg16899306 | 0.3063021  | -269.4678 | -0.3154326 | 0.6217347 | HLA-DQB2 |
| cg04254916 | 0.6289424  | -269.1213 | -0.2331128 | 0.8620552 | KRT5     |
| cg03458191 | 0.462213   | -268.9593 | -0.2873544 | 0.7495673 | SAA1     |
| cg27235662 | 0.4724743  | -268.8993 | -0.2846561 | 0.7571304 | CLDN16   |
| cg25548825 | 0.4999415  | -268.7503 | -0.2769896 | 0.7769311 | TBX10    |
| cg06356454 | 0.6943426  | -268.7236 | -0.2058588 | 0.9002013 | AQP12A   |
| cg03782453 | 0.08867389 | -268.715  | -0.295709  | 0.3843829 | FLJ90575 |
| cg26918728 | 0.583741   | -268.6897 | -0.2498741 | 0.8336151 | SEMA3B   |
| cg22253945 | 0.5099686  | -268.2018 | -0.2738457 | 0.7838143 | GPR45    |
| cg03044435 | 0.4843026  | -268.0616 | -0.2811336 | 0.7654362 | FLJ35816 |
| cg25372195 | 0.3483286  | -267.9003 | -0.3097537 | 0.6580823 | DCD      |
| cg06351503 | 0.3824882  | -267.564  | -0.3041402 | 0.6866283 | RDBP     |
| cg18239253 | 0.2416315  | -267.4139 | -0.3175006 | 0.559132  | DEFB32   |
| cg09911342 | 0.551919   | -267.0493 | -0.2602633 | 0.8121823 | ASZ1     |
| cg23881725 | 0.1247693  | -267.0098 | -0.3049144 | 0.4296838 | DLEC1    |
| cg25400358 | 0.2456114  | -266.8678 | -0.3171935 | 0.5628049 | GPR137   |
| cg00344709 | 0.4988802  | -266.8052 | -0.2765587 | 0.7754389 | ANKRD21  |
| cg05670596 | 0.1744398  | -266.7596 | -0.3133763 | 0.4878161 | CCRL2    |
| cg18807515 | 0.3080736  | -266.5872 | -0.3138494 | 0.621923  | PRAMEF2  |
| cg17237881 | 0.6826226  | -266.3007 | -0.2102904 | 0.8929129 | BIRC7    |
| cg00750606 | 0.2229054  | -266.2115 | -0.31658   | 0.5394855 | CDA      |
| cg24541550 | 0.2567583  | -266.1995 | -0.3166658 | 0.5734241 | MRVI1    |



|            |            |           |            |           |           |
|------------|------------|-----------|------------|-----------|-----------|
| cg23081213 | 0.3837045  | -265.2551 | -0.3028976 | 0.6866021 | PRKAG3    |
| cg19000186 | 0.3622676  | -265.1003 | -0.3063984 | 0.6686666 | CNGA1     |
| cg07651914 | 0.2572291  | -264.9127 | -0.3159898 | 0.5732188 | CLDN15    |
| cg21519900 | 0.214151   | -264.682  | -0.3154155 | 0.5295665 | C20orf186 |
| cg18783781 | 0.4935446  | -264.6097 | -0.2772412 | 0.7707858 | MGC4399   |
| cg21958034 | 0.4991082  | -264.5146 | -0.2756274 | 0.7747356 | MST1      |
| cg22478614 | 0.2425748  | -264.3591 | -0.3158641 | 0.5584389 | DEFB4     |
| cg08972170 | 0.2408826  | -264.2888 | -0.3158228 | 0.5567054 | Ells1     |
| cg03608577 | 0.5009508  | -264.0291 | -0.2749143 | 0.7758651 | OR12D3    |
| cg20281815 | 0.689484   | -263.7707 | -0.206655  | 0.896139  | PSCA      |
| cg15626350 | 0.158094   | -263.7547 | -0.309368  | 0.467462  | ESR1      |
| cg01897036 | 0.5470238  | -263.1692 | -0.2605069 | 0.8075308 | SCTR      |
| cg01459162 | 0.5211238  | -263.088  | -0.2686089 | 0.7897327 | PADI3     |
| cg17405586 | 0.330025   | -262.7445 | -0.3096825 | 0.6397075 | KRT1      |
| cg00714377 | 0.1018046  | -262.7059 | -0.2960327 | 0.3978373 | SLA2      |
| cg02324920 | 0.2111299  | -262.4981 | -0.3140439 | 0.5251739 | NEURL     |
| cg25993152 | 0.4062282  | -262.2642 | -0.297326  | 0.7035542 | XAGE5     |
| cg03741352 | 0.4465556  | -262.0864 | -0.2884336 | 0.7349892 | LCE3C     |
| cg26862286 | 0.6194292  | -261.9938 | -0.2345892 | 0.8540184 | NCL       |
| cg01227741 | 0.4537117  | -261.3979 | -0.2864307 | 0.7401425 | GIMAP7    |
| cg26189983 | 0.06812957 | -260.7947 | -0.2826158 | 0.3507454 | TNFRSF1B  |
| cg24353217 | 0.4876325  | -260.6299 | -0.2773451 | 0.7649776 | MYL2      |
| cg11819637 | 0.3416641  | -260.2551 | -0.3070594 | 0.6487235 | THPO      |
| cg07440877 | 0.6462179  | -260.2551 | -0.2236346 | 0.8698525 | FLJ46358  |
| cg06985415 | 0.609262   | -260.0679 | -0.237802  | 0.847064  | C10orf39  |
| cg01663968 | 0.06344497 | -260.0528 | -0.2800726 | 0.3435176 | CTSZ      |
| cg00078867 | 0.3143547  | -259.818  | -0.3099217 | 0.6242764 | WAS       |
| cg02274362 | 0.5831261  | -259.818  | -0.2471537 | 0.8302798 | PNMA6A    |
| cg12547930 | 0.3043896  | -259.6326 | -0.3107223 | 0.6151119 | WFDC6     |
| cg22510822 | 0.3369053  | -259.5505 | -0.3073104 | 0.6442158 | OR1E2     |
| cg06275635 | 0.2456896  | -259.3447 | -0.313153  | 0.5588427 | PGLYRP3   |
| cg09995854 | 0.3686127  | -259.3441 | -0.3027408 | 0.6713535 | IL1F8     |
| cg08766149 | 0.3862954  | -259.2494 | -0.299729  | 0.6860244 | GZMB      |
| cg17191715 | 0.363722   | -259.1514 | -0.30341   | 0.667132  | CA1       |
| cg02833725 | 0.3470209  | -258.2256 | -0.3053758 | 0.6523967 | ISG20L2   |
| cg14287742 | 0.4683073  | -258.2256 | -0.2814891 | 0.7497964 | BLZF1     |
| cg06980460 | 0.4585793  | -257.7181 | -0.2837236 | 0.7423029 | FOLH1     |
| cg17501569 | 0.556118   | -257.3205 | -0.2554678 | 0.8115858 | MSLN      |
| cg24743310 | 0.6123194  | -257.1492 | -0.2357277 | 0.8480471 | FLJ31196  |
| cg26385286 | 0.1663054  | -256.6999 | -0.306358  | 0.4726635 | GCNT2     |
| cg27160701 | 0.2699981  | -256.3446 | -0.3110939 | 0.5810921 | SBEM      |
| cg02717866 | 0.3469588  | -256.3327 | -0.3044807 | 0.6514395 | FLJ32771  |
| cg20576002 | 0.2992653  | -256.238  | -0.30941   | 0.6086753 | FAM112B   |
| cg04048249 | 0.3545572  | -255.9354 | -0.3032512 | 0.6578084 | APOC3     |
| cg09300114 | 0.1616524  | -255.7314 | -0.3050796 | 0.466732  | SLC16A5   |

|            |            |           |            |           |            |
|------------|------------|-----------|------------|-----------|------------|
| cg00622552 | 0.09155175 | -255.3118 | -0.2878643 | 0.379416  | ODF3L1     |
| cg19384697 | 0.1926235  | -254.1908 | -0.3079602 | 0.5005838 | UPK3B      |
| cg19717326 | 0.1459543  | -254.1178 | -0.3013991 | 0.4473534 | MYADM      |
| cg07026910 | 0.4372698  | -253.933  | -0.2871588 | 0.7244287 | INPP5D     |
| cg04645174 | 0.4373072  | -253.5016 | -0.2869679 | 0.7242752 | OR7A17     |
| cg02989940 | 0.2647014  | -253.3669 | -0.3096768 | 0.5743782 | ERAF       |
| cg06531741 | 0.2264769  | -252.9651 | -0.3093477 | 0.5358245 | HTR3B      |
| cg12949760 | 0.4001812  | -252.911  | -0.2943497 | 0.694531  | KCNQ1      |
| cg16356516 | 0.5887648  | -252.8408 | -0.2428256 | 0.8315904 | EXOSC6     |
| cg12514506 | 0.591264   | -252.6185 | -0.2418705 | 0.8331345 | OSBPL5     |
| cg25020204 | 0.2692328  | -252.1488 | -0.308894  | 0.5781268 | DBH        |
| cg16483466 | 0.4053316  | -252.1177 | -0.2930122 | 0.6983438 | C20orf186  |
| cg24490338 | 0.4324582  | -252.1177 | -0.2874381 | 0.7198963 | TPM3       |
| cg25101056 | 0.393713   | -252.1122 | -0.2951706 | 0.6888835 | KCNG4      |
| cg08634024 | 0.5692983  | -251.8622 | -0.2491691 | 0.8184674 | OR2F1      |
| cg09931793 | 0.3967506  | -251.7413 | -0.2944483 | 0.6911989 | OR2K2      |
| cg24910675 | 0.1201222  | -251.5923 | -0.2939888 | 0.4141111 | ENG        |
| cg10784090 | 0.4992883  | -251.5819 | -0.2705746 | 0.7698629 | CLDN18     |
| cg26298099 | 0.5111067  | -251.5078 | -0.2671969 | 0.7783036 | ESRRB      |
| cg21312148 | 0.2221678  | -251.4957 | -0.3083351 | 0.5305029 | LCE2D      |
| cg10417559 | 0.5116758  | -251.4448 | -0.2670028 | 0.7786786 | LMO6       |
| cg09447105 | 0.6003067  | -251.2108 | -0.238167  | 0.8384738 | PDE6H      |
| cg07220939 | 0.3199084  | -250.7599 | -0.3048447 | 0.6247531 | SLC22A12   |
| cg02719634 | 0.5191706  | -250.7361 | -0.2645454 | 0.783716  | SLC22A18AS |
| cg23244913 | 0.08521163 | -250.6808 | -0.282475  | 0.3676866 | HCG9       |
| cg21130374 | 0.258088   | -249.8567 | -0.3078908 | 0.5659788 | MX2        |
| cg23663653 | 0.4840793  | -249.7078 | -0.2739464 | 0.7580256 |            |
| cg11237817 | 0.2989385  | -249.2472 | -0.3058294 | 0.6047679 | KIR3DL3    |
| cg06489008 | 0.2457473  | -249.124  | -0.3075427 | 0.55329   | CST11      |
| cg18473117 | 0.4065917  | -248.9801 | -0.2913435 | 0.6979352 | CCDC22     |
| cg12775613 | 0.3258654  | -248.9661 | -0.3033426 | 0.6292081 | HTR1F      |
| cg18396533 | 0.1255145  | -248.6165 | -0.2934186 | 0.4189331 | DYDC1      |
| cg02981703 | 0.5585432  | -248.4913 | -0.2515113 | 0.8100545 | CA6        |
| cg17386181 | 0.4514601  | -248.3221 | -0.2814942 | 0.7329543 | MT1B       |
| cg04968473 | 0.2507459  | -248.241  | -0.3070539 | 0.5577998 | CYP1A2     |
| cg03386373 | 0.2626052  | -248.0002 | -0.3067951 | 0.5694003 | SPATA3     |
| cg24851490 | 0.1993787  | -247.9807 | -0.3048681 | 0.5042468 | RNASE2     |
| cg15782391 | 0.2619191  | -247.696  | -0.3066395 | 0.5685586 | ACPT       |
| cg24884084 | 0.1353997  | -247.6876 | -0.2951286 | 0.4305283 | SPRR1B     |
| cg18849169 | 0.4078099  | -247.6513 | -0.2904974 | 0.6983072 | GPX3       |
| cg23765993 | 0.178489   | -246.9597 | -0.3020803 | 0.4805694 | SPINLW1    |
| cg12907644 | 0.4747465  | -246.6922 | -0.2751217 | 0.7498682 | SAA2       |
| cg23587532 | 0.3188322  | -246.6133 | -0.3028324 | 0.6216645 | BM88       |
| cg03343942 | 0.23106    | -246.4151 | -0.3057452 | 0.5368052 | SLC39A5    |
| cg02706881 | 0.6504258  | -246.4015 | -0.2177653 | 0.8681911 | C21orf123  |

|            |           |           |            |           |           |
|------------|-----------|-----------|------------|-----------|-----------|
| cg07711097 | 0.3659909 | -246.3535 | -0.2969961 | 0.6629869 | GML       |
| cg00962799 | 0.4166714 | -246.3286 | -0.2881586 | 0.70483   | SSX8      |
| cg17699374 | 0.1617654 | -246.289  | -0.2992635 | 0.4610289 | MGC35206  |
| cg22022041 | 0.4743024 | -246.0835 | -0.2749692 | 0.7492716 | CCR9      |
| cg25058957 | 0.6308077 | -246.0835 | -0.2252288 | 0.8560365 | RAXL1     |
| cg17348429 | 0.5265357 | -245.8989 | -0.2604946 | 0.7870303 | ENPP7     |
| cg17095731 | 0.3431648 | -245.7195 | -0.2997484 | 0.6429132 | LRP8      |
| cg07017706 | 0.4329423 | -245.6187 | -0.284458  | 0.7174003 | K6IRS3    |
| cg15005385 | 0.2639212 | -245.4926 | -0.3053688 | 0.56929   | CCL3L1    |
| cg22088368 | 0.2286066 | -245.4609 | -0.3050956 | 0.5337022 | MGC35206  |
| cg03548857 | 0.1623071 | -245.4506 | -0.2988114 | 0.4611185 | FFAR2     |
| cg11939496 | 0.3611575 | -245.0935 | -0.2970676 | 0.6582251 | CD244     |
| cg18219418 | 0.455785  | -244.4012 | -0.2787793 | 0.7345642 | PARP6     |
| cg17582777 | 0.3179039 | -243.8695 | -0.3014906 | 0.6193945 | EFNA3     |
| cg13410437 | 0.4333952 | -243.7642 | -0.2835398 | 0.716935  | OR5P2     |
| cg20781967 | 0.1424013 | -243.6178 | -0.2940002 | 0.4364015 | NINJ2     |
| cg00466436 | 0.2103763 | -243.5166 | -0.3030354 | 0.5134117 | DEFB126   |
| cg10300154 | 0.3250486 | -243.511  | -0.3006242 | 0.6256728 | MGC5297   |
| cg25982743 | 0.1433324 | -242.8203 | -0.2936826 | 0.437015  | TIMP4     |
| cg18655584 | 0.5755368 | -242.6942 | -0.2437999 | 0.8193368 | SLC22A18  |
| cg05187322 | 0.659137  | -242.5638 | -0.2131367 | 0.8722737 | CARD14    |
| cg04086012 | 0.5549906 | -242.4878 | -0.2504338 | 0.8054244 | FLJ36180  |
| cg22484793 | 0.3971853 | -241.9597 | -0.289816  | 0.6870012 | TLR9      |
| cg19537511 | 0.260428  | -241.6443 | -0.3032894 | 0.5637174 | ARHGEF15  |
| cg26504906 | 0.1836447 | -241.1563 | -0.2991378 | 0.4827824 | PRSS16    |
| cg27069753 | 0.2217257 | -241.0796 | -0.3022648 | 0.5239905 | ELA3B     |
| cg06192619 | 0.685944  | -240.3052 | -0.2015894 | 0.8875334 | SLC1A6    |
| cg17229197 | 0.5231801 | -240.2547 | -0.2592903 | 0.7824704 | KCNQ1     |
| cg07173760 | 0.2103869 | -240.2139 | -0.3010799 | 0.5114667 | CLC       |
| cg17001430 | 0.4640868 | -240.117  | -0.2749643 | 0.7390511 | KIF25     |
| cg09736922 | 0.5355965 | -240.0316 | -0.2555193 | 0.7911158 | THPO      |
| cg01993576 | 0.107245  | -239.8182 | -0.2825115 | 0.3897566 | SLC29A1   |
| cg11161873 | 0.2336758 | -239.5082 | -0.3018261 | 0.535502  | FLJ39575  |
| cg21643191 | 0.3259125 | -239.2328 | -0.2983369 | 0.6242494 | ABCB5     |
| cg26111757 | 0.4001288 | -239.2227 | -0.288004  | 0.6881328 | C20orf185 |
| cg14550066 | 0.2324029 | -239.1774 | -0.3015884 | 0.5339913 | NCR1      |
| cg16998872 | 0.4866264 | -239.1726 | -0.2689203 | 0.7555467 | GYPE      |
| cg16792160 | 0.2570689 | -239.0951 | -0.3018766 | 0.5589455 | ASAH2     |
| cg07022477 | 0.2384506 | -238.9283 | -0.30161   | 0.5400606 | HIF3A     |
| cg08402568 | 0.3602382 | -238.8625 | -0.2941215 | 0.6543597 | MGC34647  |
| cg22294577 | 0.5554684 | -238.8155 | -0.2489072 | 0.8043756 | SLC26A3   |
| cg04457794 | 0.5242891 | -238.8007 | -0.2583795 | 0.7826686 | CTSE      |
| cg07073964 | 0.3699756 | -238.537  | -0.2925774 | 0.662553  | PRSSL1    |
| cg23458892 | 0.3593995 | -238.5122 | -0.2940549 | 0.6534544 | SIGLEC7   |
| cg01074640 | 0.3519725 | -238.4889 | -0.2950146 | 0.6469871 | IFNA17    |

|            |            |           |            |           |          |
|------------|------------|-----------|------------|-----------|----------|
| cg15423764 | 0.3629659  | -238.215  | -0.2934162 | 0.6563821 | GLYAT    |
| cg26062856 | 0.3213396  | -237.615  | -0.2979059 | 0.6192455 | ATP10A   |
| cg24388263 | 0.6520064  | -237.5085 | -0.2143621 | 0.8663685 | FLJ10374 |
| cg24198840 | 0.6861659  | -237.216  | -0.2005849 | 0.8867508 | NEU2     |
| cg04901273 | 0.4741273  | -237.0913 | -0.2712022 | 0.7453295 | TBC1D3   |
| cg11037787 | 0.5776351  | -236.7724 | -0.2409548 | 0.8185899 | PLA2G2A  |
| cg27383362 | 0.3626752  | -236.2872 | -0.2925015 | 0.6551768 | ATAD3C   |
| cg09142399 | 0.3637027  | -236.1701 | -0.2923    | 0.6560028 | CRYZ     |
| cg07446846 | 0.5363578  | -236.0011 | -0.2537156 | 0.7900734 | SLC6A8   |
| cg24552358 | 0.4051743  | -235.7294 | -0.2854326 | 0.6906068 | ORM1     |
| cg24030627 | 0.5293371  | -235.5033 | -0.2556016 | 0.7849387 | FCGBP    |
| cg17192247 | 0.08538153 | -235.4816 | -0.2719998 | 0.3573814 | MAPRE3   |
| cg06415153 | 0.2521867  | -235.3919 | -0.2997513 | 0.5519381 | PITPNM2  |
| cg19465374 | 0.5152912  | -235.3919 | -0.2595933 | 0.7748845 | AZGP1    |
| cg20573420 | 0.6456842  | -234.9929 | -0.2159968 | 0.861681  | FLJ38451 |
| cg02280309 | 0.3672827  | -234.6622 | -0.2910422 | 0.658325  | PKLR     |
| cg01375994 | 0.2555768  | -234.543  | -0.299274  | 0.5548508 | MXRA5    |
| cg03055440 | 0.3544769  | -234.3852 | -0.2926202 | 0.6470971 | MS4A6A   |
| cg24697329 | 0.4682893  | -234.0034 | -0.2712904 | 0.7395797 | ARHGEF4  |
| cg25645748 | 0.3511271  | -233.9005 | -0.2927921 | 0.6439193 | AKAP14   |
| cg21643361 | 0.2636186  | -233.8223 | -0.298816  | 0.5624346 | ZNF135   |
| cg20090497 | 0.2631778  | -233.7645 | -0.2987829 | 0.5619607 | TAS2R9   |
| cg24654350 | 0.4327385  | -233.7645 | -0.2791425 | 0.711881  | KIR3DL1  |
| cg03003745 | 0.2925084  | -233.2111 | -0.2975686 | 0.590077  | UNQ473   |
| cg05982504 | 0.3958939  | -233.1518 | -0.2858228 | 0.6817167 | IGFALS   |
| cg01053621 | 0.2697169  | -233.0276 | -0.2982647 | 0.5679817 | APOA2    |
| cg16507522 | 0.4991981  | -232.592  | -0.262847  | 0.7620451 | SERPINA3 |
| cg08886154 | 0.2479101  | -232.0489 | -0.297772  | 0.5456822 | PAX4     |
| cg00795812 | 0.113223   | -232.0262 | -0.278972  | 0.392195  | PDCD1    |
| cg11505080 | 0.1241696  | -231.5812 | -0.2817335 | 0.405903  | GPR173   |
| cg05973262 | 0.2171488  | -231.2906 | -0.2961322 | 0.513281  | NOTCH4   |
| cg20713492 | 0.06865302 | -231.1362 | -0.2619633 | 0.3306163 | AQP10    |
| cg24852661 | 0.1126102  | -231.1268 | -0.2781731 | 0.3907833 | GOLPH2   |
| cg08157292 | 0.2846843  | -231.0796 | -0.2967291 | 0.5814134 | PPP1R7   |
| cg19154438 | 0.5165108  | -230.9505 | -0.2574335 | 0.7739443 | CKM      |
| cg25214366 | 0.500765   | -230.7452 | -0.2616509 | 0.7624158 | DEFB103A |
| cg03973663 | 0.1456271  | -230.7166 | -0.2862268 | 0.4318539 | LYN      |
| cg03021690 | 0.614049   | -230.6108 | -0.2262065 | 0.8402554 | TNFAIP2  |
| cg01632517 | 0.475194   | -230.5793 | -0.268108  | 0.743302  | SSX8     |
| cg20416179 | 0.540418   | -230.2079 | -0.2502071 | 0.7906252 | C6orf71  |
| cg25531166 | 0.5066288  | -230.1177 | -0.2598052 | 0.766434  | CTAG1B   |
| cg07408456 | 0.3120572  | -230.0586 | -0.2946055 | 0.6066627 | PGLYRP2  |
| cg11465372 | 0.5688382  | -229.9571 | -0.2412885 | 0.8101268 | KRT2B    |
| cg19421752 | 0.1202252  | -229.9277 | -0.2795165 | 0.3997418 | SLC6A18  |
| cg07115820 | 0.2809049  | -229.7531 | -0.2961007 | 0.5770056 | EPX      |

|            |           |           |            |           |           |
|------------|-----------|-----------|------------|-----------|-----------|
| cg05112299 | 0.2040084 | -229.6712 | -0.2941071 | 0.4981154 | OR7A17    |
| cg21970438 | 0.4949566 | -229.6016 | -0.262685  | 0.7576416 | TLL2      |
| cg05019001 | 0.1708249 | -228.8885 | -0.2896016 | 0.4604265 | AR        |
| cg00556408 | 0.4519677 | -228.783  | -0.2727186 | 0.7246863 | TMPRSS6   |
| cg25168545 | 0.1936406 | -228.6655 | -0.2924549 | 0.4860955 | GIMAP1    |
| cg01637734 | 0.3248165 | -228.5211 | -0.2927312 | 0.6175476 | CD5L      |
| cg20305726 | 0.2457294 | -228.3122 | -0.295507  | 0.5412364 | DEFB126   |
| cg12682367 | 0.3200733 | -228.3006 | -0.293013  | 0.6130863 | FLJ46358  |
| cg09418321 | 0.1878713 | -228.0159 | -0.2913759 | 0.4792472 | DYRK4     |
| cg23173910 | 0.5086028 | -227.8738 | -0.2583209 | 0.7669237 | ACTG2     |
| cg22083047 | 0.1921601 | -227.7874 | -0.2917279 | 0.483888  | PRICKLE2  |
| cg14173523 | 0.3741659 | -227.6771 | -0.2865091 | 0.660675  | FUT5      |
| cg21961766 | 0.3948354 | -227.4842 | -0.2832057 | 0.6780411 | PRRG2     |
| cg24901474 | 0.2565571 | -227.3565 | -0.2950633 | 0.5516204 | RGS5      |
| cg15842430 | 0.3369415 | -227.3142 | -0.2909166 | 0.627858  | FAM12B    |
| cg02854090 | 0.5761593 | -227.1555 | -0.2378535 | 0.8140128 | HIST1H2AA |
| cg25882366 | 0.1098603 | -227.1525 | -0.2745469 | 0.3844072 | HOXB2     |
| cg09426307 | 0.3594036 | -226.7683 | -0.2880454 | 0.647449  | SEC14L3   |
| cg13552869 | 0.1205277 | -226.6941 | -0.2773612 | 0.3978889 | SEZ6L2    |
| cg03684977 | 0.4428008 | -226.3056 | -0.2735574 | 0.7163582 | GRB7      |
| cg22971191 | 0.2235393 | -225.972  | -0.2932366 | 0.516776  | SLC10A2   |
| cg14102807 | 0.4175147 | -225.8965 | -0.2784176 | 0.6959323 | CD19      |
| cg23413307 | 0.3561753 | -225.85   | -0.2879703 | 0.6441457 | LCE1F     |
| cg15815843 | 0.5226995 | -225.747  | -0.2535286 | 0.7762281 | MFAP5     |
| cg06938878 | 0.5592317 | -225.6973 | -0.2426764 | 0.8019081 | CALCB     |
| cg22762309 | 0.4719102 | -225.5553 | -0.266656  | 0.7385662 | OTUD6A    |
| cg01031251 | 0.320868  | -225.5465 | -0.2914325 | 0.6123005 | RPS6KA1   |
| cg07879977 | 0.2321323 | -224.7381 | -0.29291   | 0.5250422 | OR1F1     |
| cg08952029 | 0.1827976 | -224.7381 | -0.2886154 | 0.471413  | CHRD2     |
| cg07643942 | 0.2687108 | -224.6467 | -0.2934143 | 0.5621251 | LACRT     |
| cg03169180 | 0.3357258 | -224.0921 | -0.2893062 | 0.625032  | NLGN2     |
| cg15532088 | 0.6038756 | -223.8051 | -0.2273347 | 0.8312103 | C17orf66  |
| cg11554507 | 0.4519849 | -223.4912 | -0.2702709 | 0.7222558 | NEUROD6   |
| cg23680518 | 0.5839068 | -223.4828 | -0.2339332 | 0.81784   | SBSN      |
| cg06436504 | 0.3872287 | -223.4754 | -0.282412  | 0.6696407 | DOC1      |
| cg14308452 | 0.4445131 | -223.3982 | -0.2718302 | 0.7163433 | MGC24975  |
| cg15862544 | 0.6197882 | -223.3266 | -0.2215918 | 0.84138   | EGFL4     |
| cg12332316 | 0.6188246 | -223.2189 | -0.2218952 | 0.8407198 | F12       |
| cg14036856 | 0.2701641 | -222.9837 | -0.2924196 | 0.5625836 | MGC52423  |
| cg08411049 | 0.5168497 | -222.8241 | -0.2539288 | 0.7707785 | SERPINB5  |
| cg08859675 | 0.3428393 | -222.7592 | -0.2878516 | 0.6306909 | PDE4A     |
| cg26523005 | 0.2559232 | -222.6097 | -0.2922292 | 0.5481524 | ZNF662    |
| cg14578030 | 0.5162574 | -222.4007 | -0.2539105 | 0.7701679 | FGF4      |
| cg04245402 | 0.2086149 | -222.31   | -0.2898705 | 0.4984854 | C19orf21  |
| cg03330516 | 0.3340566 | -222.114  | -0.2883847 | 0.6224413 | SRMS      |

|            |            |           |            |           |           |
|------------|------------|-----------|------------|-----------|-----------|
| cg10968815 | 0.4329671  | -221.9495 | -0.2735136 | 0.7064807 | BPIL1     |
| cg00548060 | 0.410025   | -221.7446 | -0.2777433 | 0.6877683 | NPL       |
| cg15210999 | 0.35205    | -221.6914 | -0.2862535 | 0.6383035 | DTNBP1    |
| cg06818777 | 0.09212146 | -221.5824 | -0.2645674 | 0.3566888 | CHAD      |
| cg18533225 | 0.41195    | -221.563  | -0.2773058 | 0.6892558 | KLHDC7B   |
| cg19370451 | 0.5452097  | -221.4324 | -0.2452322 | 0.7904419 | CRNN      |
| cg07072643 | 0.2689972  | -221.428  | -0.2915028 | 0.5605    | EMR3      |
| cg09229960 | 0.2928557  | -221.3871 | -0.2908379 | 0.5836935 | EMD       |
| cg10779183 | 0.4792335  | -221.2399 | -0.2629474 | 0.7421809 | ELA3A     |
| cg24489015 | 0.3046856  | -221.1859 | -0.29012   | 0.5948056 | LPO       |
| cg22789545 | 0.5006495  | -221.1691 | -0.2575383 | 0.7581878 | C20orf114 |
| cg02028524 | 0.6634381  | -221.1617 | -0.2046595 | 0.8680977 | ATXN3     |
| cg07412254 | 0.3447646  | -221.1029 | -0.2867334 | 0.631498  | FLJ14816  |
| cg13271951 | 0.2345003  | -221.0961 | -0.2907441 | 0.5252445 | FAM57B    |
| cg24489034 | 0.4144485  | -221.0416 | -0.2765822 | 0.6910307 | LW-1      |
| cg16084788 | 0.6254402  | -220.6908 | -0.2186283 | 0.8440685 | SLC2A7    |
| cg09038914 | 0.4937997  | -220.6755 | -0.2590759 | 0.7528756 | GFAP      |
| cg03752087 | 0.4085552  | -220.4943 | -0.2773606 | 0.6859157 | CASP14    |
| cg23065097 | 0.1582245  | -220.4062 | -0.2817763 | 0.4400008 | FKBP1B    |
| cg00684178 | 0.4605868  | -220.3606 | -0.2668793 | 0.7274661 | NEU4      |
| cg13439299 | 0.5961191  | -220.2391 | -0.2286323 | 0.8247514 | DNAJC5G   |
| cg04491443 | 0.6675867  | -220.0877 | -0.2026995 | 0.8702862 | PDILT     |
| cg13771579 | 0.6061524  | -219.8698 | -0.2250896 | 0.831242  | TCL1B     |
| cg16272420 | 0.4522213  | -219.8671 | -0.2684902 | 0.7207115 | PNLIPRP2  |
| cg01883966 | 0.5294439  | -219.7025 | -0.2490749 | 0.7785187 | STK19     |
| cg22189286 | 0.4152595  | -219.5568 | -0.2756932 | 0.6909527 | HSPB8     |
| cg08626653 | 0.4401063  | -219.5568 | -0.2708933 | 0.7109996 | FLJ37538  |
| cg11068096 | 0.5390049  | -219.4667 | -0.2462299 | 0.7852348 | KRT14     |
| cg09841009 | 0.4959419  | -219.4555 | -0.2579812 | 0.7539231 | GYPA      |
| cg21754343 | 0.3054993  | -219.1672 | -0.2889008 | 0.5944    | LCE2B     |
| cg00436603 | 0.2584782  | -219.1381 | -0.2901208 | 0.5485989 | CYP2E1    |
| cg02164442 | 0.3007594  | -218.9318 | -0.2890243 | 0.5897837 | ITGAD     |
| cg20256783 | 0.6598619  | -218.8015 | -0.2052434 | 0.8651053 | K6HF      |
| cg08834018 | 0.2290725  | -218.7237 | -0.2889901 | 0.5180627 | PRODH     |
| cg14141399 | 0.2186015  | -218.4182 | -0.2881478 | 0.5067493 | HAS1      |
| cg14015044 | 0.04777583 | -218.3614 | -0.2419591 | 0.289735  | TNFRSF10C |
| cg03364504 | 0.636477   | -218.2646 | -0.2137796 | 0.8502566 | FLJ36116  |
| cg21207418 | 0.4672542  | -218.2579 | -0.264379  | 0.7316332 | ACP5      |
| cg21277505 | 0.6038913  | -218.2136 | -0.2252394 | 0.8291306 | LOC284361 |
| cg05131835 | 0.3717189  | -218.0681 | -0.2818187 | 0.6535376 | GH2       |
| cg09863066 | 0.1511486  | -218.0445 | -0.2787459 | 0.4298946 | PVALB     |
| cg05446471 | 0.6196816  | -218.0289 | -0.2197045 | 0.8393861 | HDAC11    |
| cg14321743 | 0.3644699  | -218.0176 | -0.2827367 | 0.6472065 | PLA2G2D   |
| cg27214365 | 0.5011694  | -217.972  | -0.255971  | 0.7571404 | GYPB      |
| cg13435189 | 0.6182107  | -217.8285 | -0.2201458 | 0.8383565 | CWF19L2   |

|            |            |           |            |           |          |
|------------|------------|-----------|------------|-----------|----------|
| cg19464944 | 0.256107   | -217.7886 | -0.2892613 | 0.5453683 | FCGR1A   |
| cg04323365 | 0.4839736  | -217.7648 | -0.2601905 | 0.744164  | GJB1     |
| cg08256781 | 0.4104481  | -217.7555 | -0.2756259 | 0.686074  | ACSBG2   |
| cg22545356 | 0.4725065  | -217.6207 | -0.2628558 | 0.7353623 | MMRN2    |
| cg18429742 | 0.3007054  | -217.479  | -0.2881654 | 0.5888708 | ZDHHC11  |
| cg14871138 | 0.3383225  | -217.3247 | -0.2852862 | 0.6236088 | NTSR1    |
| cg15337006 | 0.3983825  | -217.3104 | -0.2774345 | 0.675817  | ITGAM    |
| cg13407883 | 0.3022049  | -217.3042 | -0.2879822 | 0.5901871 | SIGLEC9  |
| cg06821120 | 0.2142455  | -217.2285 | -0.2870281 | 0.5012736 | RASSF1   |
| cg06720660 | 0.3163566  | -217.0491 | -0.2869658 | 0.6033224 | RNASE6   |
| cg19618706 | 0.1702103  | -216.7712 | -0.2813985 | 0.4516088 | BGN      |
| cg07977490 | 0.4144174  | -216.7497 | -0.2744123 | 0.6888297 | C16orf45 |
| cg13859324 | 0.2137955  | -216.714  | -0.2866595 | 0.500455  | UNC45B   |
| cg12417466 | 0.4518083  | -216.6933 | -0.2670405 | 0.7188488 | ARPP-21  |
| cg21639401 | 0.3847884  | -216.5639 | -0.2791523 | 0.6639407 | FLJ31222 |
| cg06385087 | 0.04814024 | -216.43   | -0.2406396 | 0.2887798 | CTSZ     |
| cg03993463 | 0.6262782  | -216.1393 | -0.2166783 | 0.8429564 | KCNJ15   |
| cg10894512 | 0.3506856  | -216.0513 | -0.2832931 | 0.6339787 | ACTA2    |
| cg01325515 | 0.5492007  | -215.6299 | -0.2416252 | 0.7908258 | CTAG2    |
| cg17542495 | 0.2917974  | -215.454  | -0.2873658 | 0.5791631 | GJB1     |
| cg07093661 | 0.5329809  | -215.1396 | -0.2461187 | 0.7790996 | DHDH     |
| cg03818682 | 0.3468862  | -215.1209 | -0.2831933 | 0.6300795 | MUC5AC   |
| cg02658251 | 0.3676327  | -215.0732 | -0.2807359 | 0.6483686 | DEFB4    |
| cg12069042 | 0.403605   | -214.9972 | -0.2753806 | 0.6789856 | PLXNB1   |
| cg12266049 | 0.5978611  | -214.9397 | -0.2260193 | 0.8238803 | CCND1    |
| cg17910564 | 0.2926601  | -214.5518 | -0.2867998 | 0.57946   | VDAC3    |
| cg13882988 | 0.5152222  | -214.5494 | -0.2507509 | 0.7659731 | MBL2     |
| cg24628744 | 0.1322151  | -214.487  | -0.2718567 | 0.4040718 | H2AFY    |
| cg05547500 | 0.6062328  | -214.1445 | -0.222903  | 0.8291358 | TXNDC2   |
| cg02097420 | 0.3764686  | -213.9208 | -0.2789411 | 0.6554097 | HRG      |
| cg25712380 | 0.437848   | -213.8713 | -0.2685513 | 0.7063993 | GRAP2    |
| cg18490846 | 0.2395928  | -213.8395 | -0.2863701 | 0.5259629 | C17orf73 |
| cg02554564 | 0.3701921  | -213.7088 | -0.2796643 | 0.6498564 | NTF3     |
| cg21570818 | 0.4426547  | -213.3624 | -0.2673353 | 0.70999   | FUT5     |
| cg14034870 | 0.2979006  | -213.296  | -0.2858385 | 0.5837391 | SFTPG    |
| cg11297236 | 0.2240314  | -213.2573 | -0.2851793 | 0.5092107 | PDILT    |
| cg26014197 | 0.4038215  | -213.1771 | -0.2744016 | 0.6782231 | ZNF206   |
| cg20189782 | 0.4424737  | -213.1575 | -0.2672662 | 0.7097399 | MGC27121 |
| cg09948350 | 0.5567961  | -213.1165 | -0.2383121 | 0.7951082 | FLJ25084 |
| cg26420196 | 0.1904603  | -212.799  | -0.281666  | 0.4721264 | GAS6     |
| cg12435792 | 0.2204922  | -212.5984 | -0.2845083 | 0.5050005 | PDE6B    |
| cg20047055 | 0.3907171  | -212.3933 | -0.2760676 | 0.6667847 | KLRC1    |
| cg22340747 | 0.4184859  | -212.3152 | -0.2714315 | 0.6899173 | GATM     |
| cg01581111 | 0.429196   | -212.245  | -0.2694191 | 0.6986151 | RBM18    |
| cg22534509 | 0.1817819  | -212.0446 | -0.2799808 | 0.4617628 | GPR81    |

|            |            |           |            |           |          |
|------------|------------|-----------|------------|-----------|----------|
| cg25677709 | 0.4840421  | -211.7502 | -0.2573949 | 0.7414371 | NDST1    |
| cg14898892 | 0.254415   | -211.7415 | -0.2854797 | 0.5398947 | SHRM     |
| cg18806980 | 0.3698857  | -211.5862 | -0.2785521 | 0.6484378 | KIAA0703 |
| cg04273431 | 0.1223607  | -211.0216 | -0.2667077 | 0.3890684 | PRR3     |
| cg04645843 | 0.3893785  | -210.6833 | -0.2753671 | 0.6647456 | DPCR1    |
| cg23807646 | 0.3135351  | -210.678  | -0.2834687 | 0.5970038 | SLC26A8  |
| cg06132342 | 0.2999262  | -210.6302 | -0.2841682 | 0.5840943 | KRTHB5   |
| cg03473518 | 0.06432478 | -210.4514 | -0.2443962 | 0.308721  | GJB6     |
| cg25477904 | 0.5768809  | -210.3504 | -0.2310135 | 0.8078945 | PSG1     |
| cg18884741 | 0.5939192  | -209.9977 | -0.2254128 | 0.819332  | RABGEF1  |
| cg18294257 | 0.1205186  | -209.9592 | -0.2654069 | 0.3859255 | SEC14L3  |
| cg03352153 | 0.4265451  | -209.8949 | -0.268731  | 0.6952761 | GLULD1   |
| cg21541083 | 0.5754427  | -209.5801 | -0.2311534 | 0.8065962 | STXBP2   |
| cg15602735 | 0.4175596  | -209.5078 | -0.2701603 | 0.6877199 | MAGEC2   |
| cg02813121 | 0.6049834  | -209.4615 | -0.2215398 | 0.8265232 | S100A12  |
| cg13770446 | 0.6061788  | -209.3844 | -0.2211087 | 0.8272875 | CLCNKA   |
| cg08763351 | 0.4945419  | -209.3152 | -0.2537103 | 0.7482522 | SPRR4    |
| cg20423977 | 0.4606914  | -209.2823 | -0.2615469 | 0.7222383 | PLAC4    |
| cg21432842 | 0.2543805  | -209.2441 | -0.2839068 | 0.5382873 | CSF3     |
| cg03453449 | 0.333849   | -209.1591 | -0.2810691 | 0.6149181 | USP44    |
| cg14587868 | 0.3690902  | -209.0028 | -0.2772351 | 0.6463253 | TGM1     |
| cg20692181 | 0.3346261  | -208.7502 | -0.280769  | 0.6153951 | RETN     |
| cg25827666 | 0.4787128  | -208.6175 | -0.2571739 | 0.7358867 | NTRK1    |
| cg27285599 | 0.5128479  | -208.6175 | -0.2487326 | 0.7615805 | FLJ13841 |
| cg04189838 | 0.4586864  | -208.5619 | -0.2616247 | 0.7203111 | CYP2C19  |
| cg24777950 | 0.3926003  | -208.4012 | -0.2736537 | 0.666254  | CTSG     |
| cg23749046 | 0.5500888  | -208.088  | -0.2381896 | 0.7882785 | GPR61    |
| cg16601385 | 0.3467226  | -207.93   | -0.2791691 | 0.6258917 | CFD      |
| cg19055231 | 0.04524419 | -207.7798 | -0.2322975 | 0.2775417 | STAC     |
| cg23812886 | 0.249594   | -207.5028 | -0.2826886 | 0.5322825 | SSX5     |
| cg15542496 | 0.4696707  | -207.2472 | -0.2585847 | 0.7282554 | PIP      |
| cg24352688 | 0.3382676  | -207.0901 | -0.2794965 | 0.6177641 | OFD1     |
| cg22202141 | 0.3206251  | -206.7655 | -0.2807022 | 0.6013273 | FCGR3A   |
| cg10368842 | 0.3367075  | -206.7655 | -0.2794467 | 0.6161542 | C10orf81 |
| cg26796190 | 0.04386351 | -206.7058 | -0.230664  | 0.2745275 | PYY      |
| cg01970325 | 0.2556352  | -206.6841 | -0.2823118 | 0.5379469 | NELF     |
| cg17217677 | 0.370855   | -206.6214 | -0.2756976 | 0.6465526 | SMPD3    |
| cg24429836 | 0.18339    | -206.5732 | -0.276472  | 0.459862  | LDHD     |
| cg22805308 | 0.2420615  | -206.4644 | -0.2817524 | 0.5238139 | PLEKHG5  |
| cg05810550 | 0.4476985  | -206.3721 | -0.2628351 | 0.7105336 | DEFB106A |
| cg18982568 | 0.3114197  | -206.337  | -0.2810141 | 0.5924338 | KRT1B    |
| cg25391023 | 0.2451082  | -206.2235 | -0.2817125 | 0.5268207 | BTNL2    |
| cg02187357 | 0.3581567  | -205.8701 | -0.2767877 | 0.6349444 | TBC1D22B |
| cg09258965 | 0.3796247  | -205.4494 | -0.2739084 | 0.6535331 | TBC1D7   |
| cg09914304 | 0.5579316  | -205.4428 | -0.23476   | 0.7926916 | PRF1     |



|            |            |           |            |           |           |
|------------|------------|-----------|------------|-----------|-----------|
| cg24888049 | 0.1824806  | -205.2662 | -0.2754379 | 0.4579185 | FES       |
| cg04713352 | 0.2953579  | -204.8568 | -0.2808626 | 0.5762205 | ATP4A     |
| cg04637372 | 0.3237093  | -204.8417 | -0.2793501 | 0.6030594 | FLJ32784  |
| cg12970081 | 0.2949416  | -204.6622 | -0.2807566 | 0.5756982 | GPR32     |
| cg09528351 | 0.4252292  | -204.6495 | -0.2662694 | 0.6914986 | PIK3R5    |
| cg06625767 | 0.5301371  | -204.5399 | -0.2422783 | 0.7724154 | F12       |
| cg23350580 | 0.5160019  | -204.3969 | -0.2459926 | 0.7619945 | TBC1D3C   |
| cg15905634 | 0.448384   | -204.2064 | -0.261611  | 0.7099949 | TAS2R60   |
| cg17091851 | 0.2470384  | -204.1998 | -0.280479  | 0.5275174 | LOC348174 |
| cg08784110 | 0.2590638  | -204.1487 | -0.2807533 | 0.5398171 | MAS1      |
| cg06906435 | 0.2554299  | -204.1487 | -0.2806833 | 0.5361133 | FLJ25773  |
| cg19553721 | 0.5304711  | -204.012  | -0.2419479 | 0.772419  | FAM106A   |
| cg05569220 | 0.3003169  | -203.9659 | -0.2801218 | 0.5804387 | FLJ44861  |
| cg24765446 | 0.3430396  | -203.9572 | -0.2772365 | 0.6202761 | WFDC6     |
| cg21453309 | 0.1626897  | -203.6203 | -0.2709268 | 0.4336165 | FAM101A   |
| cg00415993 | 0.1781762  | -203.5125 | -0.2735534 | 0.4517296 | F2RL2     |
| cg19784470 | 0.555299   | -203.2334 | -0.2345872 | 0.7898862 | OR7C2     |
| cg07895149 | 0.03691868 | -203.2321 | -0.2237634 | 0.260682  | FAM26B    |
| cg16377880 | 0.3187779  | -203.0977 | -0.2786342 | 0.5974121 | CYP4F3    |
| cg23240895 | 0.5595254  | -203.0596 | -0.233266  | 0.7927914 | PRR5      |
| cg07371530 | 0.5949175  | -202.9678 | -0.222285  | 0.8172026 | RPUSD1    |
| cg01987509 | 0.3062662  | -202.6938 | -0.2790841 | 0.5853504 | PGR       |
| cg11291009 | 0.1570269  | -202.6732 | -0.2691254 | 0.4261523 | ARHGEF9   |
| cg04337944 | 0.2024918  | -202.6304 | -0.2762073 | 0.4786991 | FBLN1     |
| cg24866437 | 0.4717939  | -202.603  | -0.2558327 | 0.7276267 | ALPK1     |
| cg14532417 | 0.5127263  | -202.3617 | -0.2458987 | 0.758625  | TBC1D3    |
| cg03891191 | 0.4572923  | -202.2486 | -0.2587836 | 0.716076  | PRAMEF2   |
| cg18524091 | 0.6356575  | -202.2486 | -0.2082567 | 0.8439142 | TAS1R2    |
| cg04623837 | 0.06373513 | -202.1993 | -0.2376911 | 0.3014262 | HCG9      |
| cg18530716 | 0.0912517  | -202.1879 | -0.2496949 | 0.3409466 | SLC16A11  |
| cg05241571 | 0.6263514  | -202.1838 | -0.2114735 | 0.8378248 | UNQ467    |
| cg00518911 | 0.2355487  | -201.8637 | -0.278418  | 0.5139667 | HOXA10    |
| cg16791508 | 0.4662484  | -201.5187 | -0.2565099 | 0.7227583 | KRTHB3    |
| cg18534730 | 0.3674215  | -201.4317 | -0.2731915 | 0.6406131 | CABP5     |
| cg18271969 | 0.6437663  | -201.1057 | -0.2049577 | 0.848724  | HTR3C     |
| cg04515986 | 0.1944599  | -200.9325 | -0.2740746 | 0.4685345 | FTHL17    |
| cg26884581 | 0.134738   | -200.8703 | -0.2626445 | 0.3973826 | PYGM      |
| cg02067021 | 0.424185   | -200.7444 | -0.2643948 | 0.6885798 | DNAJC5B   |
| cg13424446 | 0.5996746  | -200.6559 | -0.2198125 | 0.8194871 | GGTLA4    |
| cg19353006 | 0.3388029  | -200.6248 | -0.2756587 | 0.6144616 | TUSC3     |
| cg05873268 | 0.4759046  | -200.5136 | -0.2538834 | 0.7297881 | TPSAB1    |
| cg01305625 | 0.250491   | -200.5054 | -0.2781722 | 0.5286632 | PDLIM4    |
| cg20994561 | 0.5842282  | -200.2785 | -0.2245769 | 0.808805  | BAI1      |
| cg21518208 | 0.2945707  | -200.0726 | -0.2779149 | 0.5724856 | KRTHB5    |
| cg02173484 | 0.2551284  | -199.9543 | -0.2779503 | 0.5330787 | GJA5      |

|            |            |           |            |           |          |
|------------|------------|-----------|------------|-----------|----------|
| cg09626634 | 0.2612333  | -199.7977 | -0.2779787 | 0.539212  | EBI2     |
| cg20862119 | 0.5630982  | -199.7112 | -0.2307667 | 0.7938649 | KRT2B    |
| cg05955301 | 0.2341515  | -199.2929 | -0.2766333 | 0.5107849 | PRELP    |
| cg07531356 | 0.3917746  | -199.1343 | -0.268714  | 0.6604886 | INSL6    |
| cg27285056 | 0.4339686  | -199.096  | -0.2617579 | 0.6957265 | NAPSA    |
| cg21723486 | 0.3122382  | -199.0016 | -0.2765257 | 0.5887639 | TP73L    |
| cg21985470 | 0.2577315  | -198.9783 | -0.2773783 | 0.5351098 | PKLR     |
| cg05246522 | 0.331798   | -198.8572 | -0.275177  | 0.606975  | KSR1     |
| cg21707816 | 0.2288848  | -198.7213 | -0.275911  | 0.5047958 | ENDOGL1  |
| cg04311964 | 0.5230588  | -198.7147 | -0.2415192 | 0.764578  | LYPD2    |
| cg09923671 | 0.4183588  | -198.2975 | -0.2640992 | 0.682458  | GATA5    |
| cg01078434 | 0.5075714  | -198.2016 | -0.2452562 | 0.7528276 | MAS1L    |
| cg02847500 | 0.1444089  | -198.1743 | -0.2630647 | 0.4074737 | SOX3     |
| cg14324675 | 0.3351567  | -198.1306 | -0.2744793 | 0.609636  | LST1     |
| cg08474603 | 0.3992715  | -198.1224 | -0.2670481 | 0.6663196 | CRP      |
| cg21402035 | 0.3271441  | -198.1035 | -0.2750595 | 0.6022036 | GALR3    |
| cg18414950 | 0.1837281  | -197.9738 | -0.2704985 | 0.4542266 | PDK3     |
| cg10210238 | 0.184134   | -197.8539 | -0.2704746 | 0.4546087 | CDKN2B   |
| cg25778479 | 0.129091   | -197.604  | -0.2587011 | 0.3877921 | ANKMY2   |
| cg04037732 | 0.1559189  | -197.3795 | -0.2650607 | 0.4209796 | NLGN3    |
| cg11885098 | 0.1335142  | -197.2147 | -0.2596132 | 0.3931274 | EFNA2    |
| cg09037813 | 0.3913808  | -197.0551 | -0.2676066 | 0.6589874 | LRRFIP1  |
| cg24499411 | 0.3939739  | -196.9846 | -0.2671967 | 0.6611706 | TNS3     |
| cg26349773 | 0.4983152  | -196.8056 | -0.246857  | 0.7451722 | ATP6V0A4 |
| cg05358404 | 0.1333051  | -196.7548 | -0.2592109 | 0.392516  | RTEL1    |
| cg16542081 | 0.5290354  | -196.6716 | -0.2389917 | 0.7680271 | GATA5    |
| cg21484834 | 0.6139711  | -196.5832 | -0.2134865 | 0.8274575 | PTK6     |
| cg24898863 | 0.1296834  | -196.5449 | -0.2580678 | 0.3877513 | S100A8   |
| cg10612997 | 0.4086127  | -196.438  | -0.2646763 | 0.673289  | GREB1    |
| cg01135626 | 0.3099557  | -196.3586 | -0.2750005 | 0.5849562 | CDX4     |
| cg00819362 | 0.5324635  | -196.2975 | -0.2378981 | 0.7703615 | CLIPR-59 |
| cg01917648 | 0.2497685  | -196.2021 | -0.2753057 | 0.5250742 | SPIC     |
| cg25691167 | 0.04195161 | -195.6657 | -0.2207357 | 0.2626873 | FERD3L   |
| cg16446783 | 0.3879758  | -195.5927 | -0.2672534 | 0.6552292 | MRGPRX4  |
| cg02812142 | 0.3801998  | -195.5337 | -0.2682492 | 0.6484491 | ACMSD    |
| cg19841506 | 0.09996095 | -195.3418 | -0.2476998 | 0.3476608 | ZMYND15  |
| cg18098286 | 0.3555917  | -195.2787 | -0.2709302 | 0.6265219 | UGT1A10  |
| cg08430598 | 0.6080027  | -195.2718 | -0.2149247 | 0.8229274 | CST1     |
| cg02981853 | 0.5137917  | -195.2575 | -0.2422867 | 0.7560784 | ARHGEF18 |
| cg01657380 | 0.4054251  | -195.1218 | -0.2644471 | 0.6698722 | NPFF     |
| cg10345936 | 0.3973171  | -195.0792 | -0.2656386 | 0.6629558 | SLC36A2  |
| cg22193702 | 0.5528733  | -194.9725 | -0.2316486 | 0.7845219 | PADI1    |
| cg04365980 | 0.3602373  | -194.9189 | -0.2702298 | 0.6304671 | CLEC3A   |
| cg05606799 | 0.4380791  | -194.8968 | -0.2587646 | 0.6968437 | KISS1    |
| cg15670863 | 0.4004276  | -194.8936 | -0.2650712 | 0.6654989 | SPACA4   |

|            |           |           |            |           |           |
|------------|-----------|-----------|------------|-----------|-----------|
| cg23683201 | 0.395941  | -194.8388 | -0.2656973 | 0.6616384 | SLC22A9   |
| cg03379131 | 0.0574137 | -194.7118 | -0.2285568 | 0.2859704 | ADAM15    |
| cg02124291 | 0.4536272 | -194.6631 | -0.2556376 | 0.7092648 | OR7A5     |
| cg02311163 | 0.3444277 | -194.6208 | -0.2715818 | 0.6160095 | SEMG2     |
| cg13833831 | 0.5451831 | -194.5322 | -0.2336056 | 0.7787886 | MATK      |
| cg24816866 | 0.5029756 | -194.3671 | -0.2445348 | 0.7475104 | PARK2     |
| cg02797569 | 0.3025372 | -193.8923 | -0.2737619 | 0.5762991 | PCOLCE    |
| cg18462653 | 0.1448469 | -193.746  | -0.2598755 | 0.4047224 | DEFB119   |
| cg22937804 | 0.2643264 | -193.7308 | -0.2740504 | 0.5383769 | MGC44505  |
| cg18303397 | 0.1951233 | -192.9213 | -0.2685293 | 0.4636526 | MBD4      |
| cg05078019 | 0.2636152 | -192.6768 | -0.2733538 | 0.536969  | PDE6B     |
| cg19756068 | 0.3646923 | -192.6763 | -0.2684359 | 0.6331282 | CYP2B6    |
| cg20932053 | 0.4617846 | -192.3153 | -0.2527761 | 0.7145607 | CPM       |
| cg19592945 | 0.1599911 | -192.2575 | -0.262151  | 0.4221421 | P2RXL1    |
| cg01000094 | 0.5907457 | -192.2531 | -0.2191833 | 0.809929  |           |
| cg19096475 | 0.3523556 | -192.1987 | -0.2694162 | 0.6217718 | ASAM      |
| cg25957124 | 0.2545372 | -192.0163 | -0.2726817 | 0.5272189 | DNAH3     |
| cg01353448 | 0.1237319 | -191.9194 | -0.2528718 | 0.3766038 | C7orf16   |
| cg04833845 | 0.3494225 | -191.2783 | -0.2691457 | 0.6185682 | KCNN4     |
| cg20822579 | 0.163535  | -190.9607 | -0.2619207 | 0.4254557 | RIPK3     |
| cg21697779 | 0.1458386 | -190.9407 | -0.2580374 | 0.4038761 | FUNDC2    |
| cg07892051 | 0.3765464 | -190.8579 | -0.2660105 | 0.6425568 | AKAP3     |
| cg09712066 | 0.2605272 | -190.5541 | -0.2718851 | 0.5324123 | PART1     |
| cg14721213 | 0.2996592 | -190.5179 | -0.2717293 | 0.5713885 | FMO2      |
| cg16466334 | 0.3926902 | -190.4196 | -0.2636652 | 0.6563554 | MMP3      |
| cg21129531 | 0.6086334 | -190.3557 | -0.2127182 | 0.8213516 | LRRC4     |
| cg20104776 | 0.2947943 | -190.3118 | -0.2717213 | 0.5665156 | LDOC1     |
| cg18056600 | 0.1157624 | -190.285  | -0.2491779 | 0.3649402 | ZMYND15   |
| cg09425228 | 0.4092717 | -190.2506 | -0.2611404 | 0.6704121 | CCL20     |
| cg04893119 | 0.1729592 | -190.23   | -0.2631458 | 0.436105  | PI15      |
| cg06825166 | 0.2630236 | -190.166  | -0.2716686 | 0.5346922 | TMEM10    |
| cg26390526 | 0.5379673 | -189.9315 | -0.2334725 | 0.7714398 | FLG       |
| cg10379687 | 0.1664592 | -189.9249 | -0.2617106 | 0.4281698 | SPINLW1   |
| cg15916061 | 0.2780756 | -189.9115 | -0.2716499 | 0.5497255 | SLC17A4   |
| cg00918005 | 0.6001456 | -189.8363 | -0.2152097 | 0.8153554 | REG3G     |
| cg26954174 | 0.1695098 | -189.8307 | -0.2622135 | 0.4317232 | CARD15    |
| cg10837843 | 0.1058447 | -189.8042 | -0.2454843 | 0.351329  | DUSP1     |
| cg19372178 | 0.203829  | -189.6805 | -0.2673007 | 0.4711297 | TMEM16G   |
| cg13283751 | 0.1018698 | -189.582  | -0.243902  | 0.3457718 | GPX5      |
| cg26309498 | 0.57252   | -189.3937 | -0.2234724 | 0.7959924 | EDAR      |
| cg02988947 | 0.2772728 | -189.2157 | -0.271185  | 0.5484578 | LIMD2     |
| cg15648315 | 0.4680343 | -189.1788 | -0.2498348 | 0.717869  | FLJ26443  |
| cg24517042 | 0.5950937 | -189.1063 | -0.2164841 | 0.8115779 | CAV3      |
| cg03387497 | 0.5486198 | -189.0081 | -0.2301297 | 0.7787495 | C20orf179 |
| cg24340657 | 0.3821978 | -188.9686 | -0.2641847 | 0.6463825 | KRT24     |

|            |            |           |            |           |           |
|------------|------------|-----------|------------|-----------|-----------|
| cg13792279 | 0.6216349  | -188.8702 | -0.2078385 | 0.8294734 | CLDN17    |
| cg27329371 | 0.2811586  | -188.86   | -0.2709361 | 0.5520948 | ALDH3A1   |
| cg15329483 | 0.3278261  | -188.7763 | -0.2692637 | 0.5970898 | SSX7      |
| cg19033555 | 0.3168219  | -188.247  | -0.269567  | 0.5863889 | DEFB1     |
| cg15895197 | 0.1444672  | -188.0706 | -0.2555158 | 0.399983  | EMILIN1   |
| cg20401945 | 0.1268258  | -188.0104 | -0.2507658 | 0.3775916 | ASPHD1    |
| cg22970435 | 0.1126291  | -187.8062 | -0.2462223 | 0.3588514 | SPATS1    |
| cg20795863 | 0.4403925  | -187.651  | -0.2544398 | 0.6948323 | NEU2      |
| cg10125195 | 0.435105   | -187.5501 | -0.2553348 | 0.6904398 | LACRT     |
| cg13603551 | 0.4619253  | -187.5501 | -0.2502385 | 0.7121638 | ABP1      |
| cg25383242 | 0.636734   | -187.5257 | -0.2022196 | 0.8389536 | CNTNAP4   |
| cg21846488 | 0.1496335  | -187.5162 | -0.2563191 | 0.4059526 | LCE4A     |
| cg03574571 | 0.5234925  | -187.4537 | -0.2360731 | 0.7595656 | CD22      |
| cg26391080 | 0.4771285  | -187.4062 | -0.246974  | 0.7241026 | SH2D4B    |
| cg15495837 | 0.5019926  | -187.4062 | -0.2413417 | 0.7433342 | TRIM43    |
| cg20514061 | 0.2042657  | -187.1856 | -0.2655533 | 0.469819  | MID2      |
| cg09001777 | 0.3832434  | -187.0038 | -0.2628967 | 0.6461401 | FUT3      |
| cg13281868 | 0.401174   | -186.9807 | -0.2604667 | 0.6616407 | C6orf142  |
| cg12536534 | 0.118301   | -186.8185 | -0.247263  | 0.365564  | G6PD      |
| cg12992720 | 0.2000777  | -186.8018 | -0.2647579 | 0.4648356 | EDG4      |
| cg23213217 | 0.2886654  | -186.5647 | -0.2693592 | 0.5580245 | DEGS1     |
| cg05546044 | 0.289497   | -186.5007 | -0.2693052 | 0.5588021 | MAPK1     |
| cg00476577 | 0.08318712 | -186.1728 | -0.2338716 | 0.3170587 | ZNF217    |
| cg09256683 | 0.299118   | -186.0936 | -0.2688506 | 0.5679686 | CCL14     |
| cg25839227 | 0.3436241  | -186.0725 | -0.2664319 | 0.610056  | ABI3      |
| cg21209356 | 0.4324562  | -186.062  | -0.2549706 | 0.6874267 | CSF2RB    |
| cg01367992 | 0.3218325  | -185.8857 | -0.2677934 | 0.5896258 | LY9       |
| cg04405541 | 0.5993639  | -185.8311 | -0.213748  | 0.8131119 | C20orf114 |
| cg21365235 | 0.1810999  | -185.8203 | -0.2612693 | 0.4423692 | OCRL      |
| cg12943082 | 0.5045133  | -185.627  | -0.2398513 | 0.7443646 | CCL26     |
| cg07443748 | 0.3082674  | -185.6058 | -0.2682362 | 0.5765036 | CESK1     |
| cg06226384 | 0.1494388  | -185.5711 | -0.2547889 | 0.4042277 | CACNG5    |
| cg17170504 | 0.3303871  | -185.4319 | -0.2669897 | 0.5973768 | HSPC065   |
| cg05600717 | 0.07640045 | -185.3054 | -0.2301993 | 0.3065997 | FLJ13639  |
| cg26628847 | 0.2374603  | -185.2634 | -0.267205  | 0.5046653 | PIP       |
| cg26218269 | 0.2228687  | -184.9866 | -0.2659045 | 0.4887733 | MAB21L2   |
| cg24311282 | 0.6030508  | -184.9164 | -0.2121986 | 0.8152493 | SIGLEC11  |
| cg20782689 | 0.5919561  | -184.8594 | -0.2156209 | 0.807577  | OXA1L     |
| cg04349727 | 0.3605692  | -184.7503 | -0.2640857 | 0.6246549 | KLK5      |
| cg01837574 | 0.2671176  | -184.7066 | -0.2680393 | 0.535157  | TRAPPC1   |
| cg21624359 | 0.2133052  | -184.6153 | -0.2647111 | 0.4780163 | FFAR3     |
| cg08642068 | 0.4696039  | -184.5652 | -0.2470703 | 0.7166742 | SPAG4L    |
| cg11599505 | 0.5328135  | -184.4523 | -0.2322147 | 0.7650282 | C20orf102 |
| cg19486673 | 0.1917373  | -184.3527 | -0.2618292 | 0.4535665 | LILRA2    |
| cg23047271 | 0.09914307 | -184.2144 | -0.238644  | 0.3377871 | PRICKLE2  |

|            |            |           |            |           |           |
|------------|------------|-----------|------------|-----------|-----------|
| cg24310246 | 0.4841552  | -184.0491 | -0.2436975 | 0.7278527 | RAXL1     |
| cg07608333 | 0.2425347  | -183.77   | -0.2664674 | 0.5090021 | CD209     |
| cg27622610 | 0.2421099  | -183.7466 | -0.2664249 | 0.5085348 | OR1G1     |
| cg11834681 | 0.5249583  | -183.568  | -0.2338051 | 0.7587633 | CYP2A13   |
| cg15952487 | 0.2266112  | -183.3671 | -0.2650713 | 0.4916825 | CD1B      |
| cg20261167 | 0.1578572  | -183.2531 | -0.254923  | 0.4127803 | SPP1      |
| cg23338993 | 0.4015157  | -183.1375 | -0.2581852 | 0.6597009 | UGT1A6    |
| cg18881269 | 0.3840072  | -182.9353 | -0.2603816 | 0.6443889 | LEPREL2   |
| cg25141490 | 0.2377208  | -182.8718 | -0.2655412 | 0.503262  | IL17B     |
| cg08695223 | 0.2650516  | -182.8064 | -0.2666976 | 0.5317491 | SLC9A6    |
| cg26065841 | 0.533332   | -182.642  | -0.2312067 | 0.7645386 | CHAC1     |
| cg12552392 | 0.3585198  | -182.5908 | -0.2629563 | 0.6214761 | NFS1      |
| cg02825709 | 0.4881676  | -182.4422 | -0.2419778 | 0.7301454 | ZNF75A    |
| cg13530039 | 0.2671522  | -182.4259 | -0.2664812 | 0.5336334 | CHRM1     |
| cg14511156 | 0.2281513  | -182.3826 | -0.2644895 | 0.4926409 | OSCAR     |
| cg03916421 | 0.1694483  | -182.3285 | -0.2565772 | 0.4260255 | LOC132321 |
| cg05654163 | 0.3689068  | -182.047  | -0.2615744 | 0.6304811 | SLC39A2   |
| cg07922606 | 0.2305563  | -181.9886 | -0.2644    | 0.4949563 | HIST1H3E  |
| cg22563697 | 0.4648918  | -181.7333 | -0.2465158 | 0.7114077 | PPP1R16A  |
| cg19447966 | 0.5177283  | -181.6885 | -0.2346773 | 0.7524056 | TEAD1     |
| cg11263296 | 0.08003377 | -181.6528 | -0.228853  | 0.3088868 | CCDC64    |
| cg07745725 | 0.3710933  | -181.4975 | -0.2610013 | 0.6320946 | PSG3      |
| cg24235633 | 0.5908841  | -181.3684 | -0.2144129 | 0.805297  | CDIPT     |
| cg08109646 | 0.3651298  | -181.3225 | -0.2615187 | 0.6266485 | ZNF683    |
| cg21122774 | 0.4907382  | -181.0324 | -0.2406688 | 0.7314069 | SARDH     |
| cg00319692 | 0.2361266  | -180.9559 | -0.2640699 | 0.5001965 | ATP6V0D2  |
| cg18221897 | 0.4442658  | -180.9332 | -0.25001   | 0.6942758 | KIR2DL1   |
| cg02579133 | 0.418952   | -180.4924 | -0.2540438 | 0.6729958 | KRTAP10-8 |
| cg19403023 | 0.286268   | -180.3768 | -0.2652347 | 0.5515027 | TESSP1    |
| cg08191854 | 0.1046144  | -180.2178 | -0.2374512 | 0.3420657 | TRPM2     |
| cg26415633 | 0.2069324  | -180.0598 | -0.2606835 | 0.4676159 | KLK1      |
| cg18113270 | 0.6263433  | -180.0358 | -0.2026521 | 0.8289954 | MMP3      |
| cg11733245 | 0.4270356  | -179.9895 | -0.2524563 | 0.6794919 | IL2RA     |
| cg11151665 | 0.5748645  | -179.9521 | -0.2185227 | 0.7933872 | PSG6      |
| cg04806409 | 0.495049   | -179.9385 | -0.2391297 | 0.7341787 | TFF3      |
| cg10432859 | 0.3816145  | -179.7769 | -0.2587565 | 0.6403711 | UGT1A7    |
| cg03329572 | 0.44064    | -179.7315 | -0.2499846 | 0.6906246 | FCRL5     |
| cg10408410 | 0.4658926  | -179.6743 | -0.2451923 | 0.711085  | RLBP1     |
| cg21434954 | 0.3879972  | -179.6503 | -0.2579005 | 0.6458977 | LCE1B     |
| cg21458041 | 0.3653717  | -179.3911 | -0.2602949 | 0.6256666 | TNP2      |
| cg09492887 | 0.1097757  | -179.2647 | -0.2384829 | 0.3482586 | SLC26A5   |
| cg18356799 | 0.2607601  | -179.2167 | -0.2640782 | 0.5248383 | DSC1      |
| cg07207789 | 0.3321264  | -179.2084 | -0.2628865 | 0.5950129 | CRISPLD2  |
| cg25195673 | 0.2316896  | -179.2084 | -0.2624797 | 0.4941693 | GFPT1     |
| cg01868128 | 0.3555326  | -178.9833 | -0.2609662 | 0.6164987 | LCE5A     |

|            |            |           |            |           |           |
|------------|------------|-----------|------------|-----------|-----------|
| cg18085517 | 0.2791873  | -178.9717 | -0.264255  | 0.5434423 | TRPM1     |
| cg08260891 | 0.07290064 | -178.6632 | -0.223179  | 0.2960796 | PPGB      |
| cg00280894 | 0.1762456  | -178.5701 | -0.254976  | 0.4312215 | NXF2      |
| cg11219178 | 0.5053056  | -178.5439 | -0.2360446 | 0.7413502 | OSBPL5    |
| cg05248470 | 0.224186   | -178.339  | -0.2612159 | 0.4854019 | LILRB2    |
| cg26946769 | 0.5588534  | -178.0973 | -0.2221791 | 0.7810324 | MAPK4     |
| cg06259570 | 0.3641248  | -177.9901 | -0.2595381 | 0.6236629 | MMP27     |
| cg02992596 | 0.2966986  | -177.8412 | -0.2633901 | 0.5600887 | MGC27016  |
| cg09871043 | 0.2179843  | -177.7904 | -0.2602181 | 0.4782025 | PKHD1     |
| cg11456838 | 0.2818794  | -177.6334 | -0.263348  | 0.5452273 | LOC202459 |
| cg01550148 | 0.2840911  | -177.6185 | -0.26334   | 0.5474311 | H2AFY     |
| cg25098401 | 0.2575034  | -177.5782 | -0.262802  | 0.5203053 | LCE2B     |
| cg27420123 | 0.4711864  | -177.3668 | -0.2428581 | 0.7140445 | FSHB      |
| cg10137010 | 0.1537592  | -177.254  | -0.2493611 | 0.4031202 | TRPV3     |
| cg01668126 | 0.4380164  | -177.2337 | -0.2490118 | 0.6870282 | MSR1      |
| cg23696712 | 0.5416806  | -177.2336 | -0.2263722 | 0.7680528 | KRT6L     |
| cg04744379 | 0.509477   | -177.0384 | -0.2342845 | 0.7437615 | KLK15     |
| cg26015133 | 0.5657801  | -177.0116 | -0.2197306 | 0.7855107 | FCRLM2    |
| cg16219122 | 0.2220757  | -176.9846 | -0.2600193 | 0.482095  | ABCB1     |
| cg23571857 | 0.2838598  | -176.9396 | -0.2628628 | 0.5467227 | BIRC4BP   |
| cg26718420 | 0.3749227  | -176.8828 | -0.2577172 | 0.6326399 | C12orf59  |
| cg13861644 | 0.4133269  | -176.8541 | -0.2527479 | 0.6660748 | PIWIL1    |
| cg12954718 | 0.2304437  | -176.6959 | -0.2605446 | 0.4909883 | USP6      |
| cg07676849 | 0.3240337  | -176.6029 | -0.2616235 | 0.5856572 | FOLR3     |
| cg21682902 | 0.5573161  | -176.6003 | -0.2218749 | 0.779191  | HAL       |
| cg12029639 | 0.1853153  | -176.5101 | -0.2549417 | 0.440257  | MAB21L1   |
| cg11584690 | 0.1212908  | -176.3928 | -0.2399178 | 0.3612086 | ZNF574    |
| cg05301852 | 0.3338457  | -176.2472 | -0.2608342 | 0.59468   | FABP1     |
| cg01910481 | 0.4853411  | -176.2406 | -0.2392843 | 0.7246255 | PLUNC     |
| cg02431964 | 0.3931876  | -175.9629 | -0.2549895 | 0.6481771 | MARCO     |
| cg11653864 | 0.2128587  | -175.8571 | -0.258224  | 0.4710826 | ELK1      |
| cg26928682 | 0.599416   | -175.761  | -0.2093052 | 0.8087211 | TREML2    |
| cg12133004 | 0.4039559  | -175.5912 | -0.2533339 | 0.6572897 | C12orf54  |
| cg27566805 | 0.230506   | -175.5842 | -0.2597324 | 0.4902384 | USH2A     |
| cg15055101 | 0.1267877  | -175.434  | -0.2408232 | 0.3676109 | SH2D3A    |
| cg08448751 | 0.4089026  | -175.4304 | -0.2525397 | 0.6614423 | SEMA3G    |
| cg27022827 | 0.2105317  | -175.3082 | -0.2575473 | 0.468079  | TJP3      |
| cg11472424 | 0.4142789  | -175.2602 | -0.2516552 | 0.6659341 | PFKFB1    |
| cg02148642 | 0.2276822  | -175.2147 | -0.2592191 | 0.4869013 | RGPD5     |
| cg12428416 | 0.5498995  | -174.904  | -0.2230526 | 0.772952  | GJA3      |
| cg19587887 | 0.449131   | -174.8019 | -0.2456491 | 0.6947802 | PSKH2     |
| cg27348440 | 0.5667077  | -174.6699 | -0.218354  | 0.7850618 |           |
| cg23029519 | 0.4534079  | -174.5536 | -0.244727  | 0.6981349 | IFNA4     |
| cg25043279 | 0.4382145  | -174.4784 | -0.2473819 | 0.6855964 | C7orf33   |
| cg15914863 | 0.579603   | -174.3973 | -0.2145621 | 0.7941651 | CYP2W1    |

|            |            |           |            |           |           |
|------------|------------|-----------|------------|-----------|-----------|
| cg13605579 | 0.5143222  | -174.1636 | -0.2316424 | 0.7459645 | ALPP      |
| cg05500074 | 0.4649838  | -173.9608 | -0.2421989 | 0.7071827 | TSKS      |
| cg21355508 | 0.333866   | -173.8726 | -0.2592716 | 0.5931376 | RBM10     |
| cg17474651 | 0.4935828  | -173.8436 | -0.2362084 | 0.7297912 | MAGEC3    |
| cg14722162 | 0.3988535  | -173.8328 | -0.2529508 | 0.6518043 | C5orf20   |
| cg20789620 | 0.1895484  | -173.8014 | -0.2535463 | 0.4430947 | FSD1      |
| cg21491308 | 0.1385498  | -173.7746 | -0.2428128 | 0.3813626 | TEX101    |
| cg15798153 | 0.1746617  | -173.6502 | -0.2508786 | 0.4255403 | PFTK1     |
| cg13705284 | 0.2533025  | -173.6214 | -0.2597742 | 0.5130768 | ACOX2     |
| cg14625604 | 0.169727   | -173.5719 | -0.2498694 | 0.4195963 | UBE2A     |
| cg04514469 | 0.5718295  | -173.1792 | -0.2162055 | 0.788035  | C14orf49  |
| cg11052143 | 0.1598897  | -173.1209 | -0.2474778 | 0.4073675 | ALS2CR11  |
| cg19831369 | 0.3097072  | -173.1167 | -0.259852  | 0.5695592 | HPS4      |
| cg26980692 | 0.1976468  | -172.8776 | -0.2540477 | 0.4516945 | SLC15A3   |
| cg21964481 | 0.4075997  | -172.8776 | -0.25118   | 0.6587797 | SLC34A3   |
| cg07790638 | 0.408012   | -172.7354 | -0.2510368 | 0.6590487 | LOC91431  |
| cg11405695 | 0.2643769  | -172.6174 | -0.2594933 | 0.5238702 | ATAD3C    |
| cg12069309 | 0.06473751 | -172.6174 | -0.2141955 | 0.278933  | SEMA3B    |
| cg25605408 | 0.6201158  | -172.5825 | -0.2014577 | 0.8215735 | FLJ40142  |
| cg22445920 | 0.3944833  | -172.4411 | -0.2526537 | 0.647137  | SLC36A3   |
| cg06825142 | 0.03978399 | -172.2629 | -0.2000927 | 0.2398766 | DRD4      |
| cg05047411 | 0.2754039  | -172.0942 | -0.2593867 | 0.5347906 | MAGEA8    |
| cg03723845 | 0.5652186  | -171.9025 | -0.2174366 | 0.7826551 | BTNL8     |
| cg06736444 | 0.2827881  | -171.8833 | -0.2593223 | 0.5421104 | SRRM2     |
| cg26751195 | 0.5781908  | -171.6088 | -0.2136538 | 0.7918446 | SPN       |
| cg22165685 | 0.07430244 | -171.5096 | -0.2178714 | 0.2921739 | VENTX     |
| cg11201288 | 0.4703562  | -171.4768 | -0.2397445 | 0.7101007 | SFRS11    |
| cg07196761 | 0.582841   | -171.1973 | -0.2121249 | 0.7949659 | WDR71     |
| cg23887102 | 0.2767461  | -171.1857 | -0.2587608 | 0.5355069 | TAAR6     |
| cg17820828 | 0.4887591  | -171.1445 | -0.2357813 | 0.7245404 | KCNQ1     |
| cg19903229 | 0.2768302  | -170.9178 | -0.258573  | 0.5354032 | C14orf105 |
| cg14178895 | 0.200471   | -170.7741 | -0.2528321 | 0.4533031 | C6orf105  |
| cg19881895 | 0.5399979  | -170.6494 | -0.2235115 | 0.7635094 | SLC43A3   |
| cg08007665 | 0.5834132  | -170.6005 | -0.2116787 | 0.7950919 | KCNQ1     |
| cg04457051 | 0.348849   | -170.5621 | -0.2560638 | 0.6049128 | SCOC      |
| cg13446199 | 0.3121101  | -170.5087 | -0.257993  | 0.570103  | PSCA      |
| cg01762581 | 0.1787363  | -170.3979 | -0.2490881 | 0.4278245 | DKK4      |
| cg07864297 | 0.1671382  | -170.3475 | -0.2468163 | 0.4139546 | ESRRB     |
| cg17733331 | 0.07605612 | -170.2297 | -0.2176009 | 0.293657  | CDH3      |
| cg25661884 | 0.1583112  | -170.2272 | -0.2448232 | 0.4031344 | RDH8      |
| cg03960217 | 0.1387403  | -170.2272 | -0.2400006 | 0.3787409 | LCE2C     |
| cg24816455 | 0.2230873  | -170.2078 | -0.2550505 | 0.4781379 | SEMA3B    |
| cg19421044 | 0.1767576  | -170.1655 | -0.2485305 | 0.4252881 | DNASE1L1  |
| cg07473550 | 0.09584954 | -170.122  | -0.2258714 | 0.3217209 | TSC22D3   |
| cg13018903 | 0.412598   | -170.0639 | -0.2487461 | 0.6613441 | FLJ25530  |

|            |            |           |            |           |          |
|------------|------------|-----------|------------|-----------|----------|
| cg01474260 | 0.342871   | -170.0346 | -0.2561257 | 0.5989967 | CESK1    |
| cg24621042 | 0.2849946  | -169.8795 | -0.2578923 | 0.5428869 | SERPINA1 |
| cg09686308 | 0.2312016  | -169.8795 | -0.2555374 | 0.486739  | CIB3     |
| cg08321330 | 0.4678562  | -169.6009 | -0.2391589 | 0.7070151 | TPSB2    |
| cg18043195 | 0.5147299  | -169.5377 | -0.2290941 | 0.7438241 | C9orf138 |
| cg26644395 | 0.2091072  | -169.445  | -0.2529157 | 0.4620229 | UCN3     |
| cg01739167 | 0.3155938  | -169.4367 | -0.2571198 | 0.5727136 | CHRNE    |
| cg24862483 | 0.08084463 | -169.2192 | -0.2188854 | 0.2997301 | CD300LG  |
| cg14535518 | 0.2431425  | -169.0738 | -0.2558439 | 0.4989864 | MAG      |
| cg25082710 | 0.1945236  | -168.8533 | -0.2504703 | 0.4449939 | IVL      |
| cg12530021 | 0.1368251  | -168.712  | -0.2382433 | 0.3750684 | SIGLEC12 |
| cg14876043 | 0.587453   | -168.6886 | -0.2095941 | 0.7970471 | NALP7    |
| cg15206445 | 0.3720189  | -168.5301 | -0.2526954 | 0.6247143 | SPG7     |
| cg06980053 | 0.235104   | -168.4447 | -0.2547877 | 0.4898917 | RASSF1   |
| cg01714932 | 0.4055956  | -168.3946 | -0.2486808 | 0.6542764 | PZP      |
| cg20070090 | 0.2541893  | -168.3889 | -0.25598   | 0.5101693 | S100A8   |
| cg01982597 | 0.4390179  | -168.2904 | -0.2435891 | 0.682607  | PGBD3    |
| cg03087937 | 0.4438688  | -168.2477 | -0.242745  | 0.6866138 | MUC15    |
| cg20349625 | 0.5746139  | -168.1859 | -0.2130078 | 0.7876217 | PLCG2    |
| cg11959435 | 0.4028459  | -168.0057 | -0.2488014 | 0.6516473 | IFNA1    |
| cg21087701 | 0.3230407  | -167.894  | -0.2557722 | 0.5788128 | GPR119   |
| cg00968475 | 0.113787   | -167.8902 | -0.2305215 | 0.3443085 | BHLHB9   |
| cg04557383 | 0.09990897 | -167.6202 | -0.2253419 | 0.3252509 | MT1H     |
| cg06793062 | 0.541353   | -167.6175 | -0.2216008 | 0.7629538 | CNTNAP4  |
| cg12205591 | 0.336417   | -167.2944 | -0.254692  | 0.5911089 | CRYAA    |
| cg21109025 | 0.484821   | -167.1731 | -0.2343937 | 0.7192147 | CCL2     |
| cg05812599 | 0.4641512  | -167.034  | -0.2383963 | 0.7025475 | CLPB     |
| cg03956628 | 0.1574326  | -167.0002 | -0.2420311 | 0.3994637 | MLH1     |
| cg14076161 | 0.2659205  | -166.9076 | -0.2553881 | 0.5213086 | PRB4     |
| cg18674980 | 0.06738764 | -166.643  | -0.2104566 | 0.2778443 | CA3      |
| cg17034109 | 0.250932   | -166.5113 | -0.254421  | 0.505353  | CYB561D1 |
| cg20176989 | 0.3457672  | -166.2876 | -0.2534207 | 0.5991879 | KIR3DL2  |
| cg11128808 | 0.4956025  | -166.1061 | -0.2315262 | 0.7271286 | CACNG6   |
| cg05135288 | 0.2233478  | -166.0227 | -0.251896  | 0.4752438 | RHOT2    |
| cg00563932 | 0.4704962  | -165.7676 | -0.2364595 | 0.7069557 | PTGDS    |
| cg14186992 | 0.4123538  | -165.6765 | -0.2460742 | 0.6584281 | HKR3     |
| cg15075718 | 0.3804548  | -165.6535 | -0.2499679 | 0.6304227 | MFRP     |
| cg26757722 | 0.2152422  | -165.642  | -0.2507292 | 0.4659714 | CACNG2   |
| cg06800962 | 0.1876673  | -165.1494 | -0.2464921 | 0.4341594 | TM4SF1   |
| cg19539004 | 0.3130974  | -165.0487 | -0.2541615 | 0.5672589 | LIF      |
| cg24389359 | 0.3469499  | -164.8503 | -0.2523772 | 0.599327  | CCDC63   |
| cg10604646 | 0.2829477  | -164.7336 | -0.2542005 | 0.5371482 | RGS5     |
| cg15669228 | 0.3338743  | -164.5576 | -0.2529764 | 0.5868507 | IFNA8    |
| cg19258973 | 0.3640353  | -164.4928 | -0.250804  | 0.6148393 | KRTHB3   |
| cg26222045 | 0.3387242  | -164.395  | -0.2525929 | 0.5913171 | UNQ5810  |



|            |            |           |            |           |           |
|------------|------------|-----------|------------|-----------|-----------|
| cg10318258 | 0.4874021  | -164.1465 | -0.232164  | 0.719566  | RIPK3     |
| cg10986043 | 0.2734883  | -164.1398 | -0.2535937 | 0.527082  | TCAP      |
| cg14662756 | 0.3977151  | -164.1398 | -0.2470227 | 0.6447378 | NPFF      |
| cg17749384 | 0.5901205  | -164.121  | -0.2066543 | 0.7967747 | MPP7      |
| cg19257200 | 0.5227445  | -164.0954 | -0.2243125 | 0.7470571 | SOX10     |
| cg03918304 | 0.1995784  | -164.067  | -0.2474797 | 0.4470581 | HOXD10    |
| cg05755354 | 0.3055223  | -163.6578 | -0.2533534 | 0.5588757 | FRMD4A    |
| cg16514843 | 0.3467244  | -163.6481 | -0.2515744 | 0.5982988 | PAX4      |
| cg15677294 | 0.3925256  | -163.6262 | -0.2473127 | 0.6398383 | TUBB4     |
| cg12391921 | 0.3642659  | -163.5326 | -0.2501394 | 0.6144053 | ITGB1BP2  |
| cg22954265 | 0.5752703  | -163.3958 | -0.2104909 | 0.7857612 | FLJ45832  |
| cg06323290 | 0.369143   | -163.2662 | -0.2495268 | 0.6186698 | HK1       |
| cg00418150 | 0.3644933  | -163.1277 | -0.2498499 | 0.6143432 | ALX4      |
| cg12610070 | 0.07939307 | -163.1277 | -0.2131105 | 0.2925036 | TSPAN15   |
| cg00833777 | 0.4235698  | -163.0731 | -0.2428501 | 0.6664199 | ITGAM     |
| cg04345908 | 0.4918993  | -162.9841 | -0.2305656 | 0.7224649 | HLA-DQB2  |
| cg05330360 | 0.2885023  | -162.6511 | -0.2527348 | 0.5412371 | ZPBP2     |
| cg20993403 | 0.5755242  | -162.6356 | -0.210046  | 0.7855701 | EPB41L1   |
| cg26705561 | 0.2897427  | -162.6215 | -0.2527157 | 0.5424584 | SEC31L2   |
| cg21514871 | 0.1343887  | -162.5237 | -0.2324864 | 0.3668751 | MEFV      |
| cg17412560 | 0.2365186  | -162.4882 | -0.250398  | 0.4869167 | CSEN      |
| cg12937434 | 0.1130428  | -162.3762 | -0.225687  | 0.3387298 | BZRAP1    |
| cg11825652 | 0.330113   | -162.0661 | -0.2514355 | 0.5815486 | CAV2      |
| cg26745032 | 0.2073389  | -162.0204 | -0.2469416 | 0.4542806 | REPS2     |
| cg11721194 | 0.3236445  | -161.945  | -0.2516246 | 0.5752692 | SLAMF7    |
| cg15792367 | 0.2699205  | -161.812  | -0.2517688 | 0.5216893 | KLK11     |
| cg18254848 | 0.4922141  | -161.5843 | -0.2297071 | 0.7219212 | CLC       |
| cg01143454 | 0.09420494 | -161.5804 | -0.2180513 | 0.3122562 | C20orf141 |
| cg00134539 | 0.4771644  | -161.4818 | -0.2326842 | 0.7098486 | UBASH3A   |
| cg19987219 | 0.4185446  | -161.4396 | -0.2425529 | 0.6610975 | FLJ32011  |
| cg19481686 | 0.3828966  | -161.4345 | -0.2469528 | 0.6298494 | CDKN2B    |
| cg13320683 | 0.4200022  | -161.2009 | -0.242195  | 0.6621972 | RHOBTB1   |
| cg02694395 | 0.2933137  | -160.8614 | -0.2514415 | 0.5447552 | FMO4      |
| cg12653105 | 0.2562944  | -160.8447 | -0.2504689 | 0.5067633 | PLP2      |
| cg23216015 | 0.1462874  | -160.7387 | -0.2342258 | 0.3805131 | C7orf16   |
| cg22772878 | 0.2146796  | -160.7279 | -0.24684   | 0.4615197 | DIRAS1    |
| cg25771201 | 0.3392887  | -160.6178 | -0.2499466 | 0.5892353 | SCDR10    |
| cg13125510 | 0.222744   | -160.6178 | -0.2476585 | 0.4704025 | C11orf44  |
| cg00044729 | 0.3752487  | -160.5118 | -0.2471111 | 0.6223598 | FLJ25421  |
| cg13286902 | 0.2110615  | -160.4123 | -0.2461446 | 0.4572061 | CXorf34   |
| cg18988110 | 0.2139248  | -160.3132 | -0.2464176 | 0.4603425 | ATAD4     |
| cg12732155 | 0.2149399  | -160.0559 | -0.2463406 | 0.4612805 | LAPTM5    |
| cg04387658 | 0.4463339  | -160.0376 | -0.2373991 | 0.6837329 | CD86      |
| cg24959428 | 0.3469687  | -160.0038 | -0.2490519 | 0.5960206 | GBP6      |
| cg23756219 | 0.1781865  | -159.9318 | -0.2406223 | 0.4188087 | DRP2      |

|            |           |           |            |           |           |
|------------|-----------|-----------|------------|-----------|-----------|
| cg26259865 | 0.5222568 | -159.694  | -0.2220325 | 0.7442893 | LOC124220 |
| cg22585988 | 0.4500228 | -159.6196 | -0.2365234 | 0.6865462 | PVRL4     |
| cg13370916 | 0.1877522 | -159.5882 | -0.2420529 | 0.4298052 | STARD8    |
| cg07947016 | 0.2339733 | -159.5658 | -0.2479194 | 0.4818926 | KLK2      |
| cg19910382 | 0.3468637 | -159.5562 | -0.2487451 | 0.5956088 | FABP1     |
| cg22010317 | 0.1996903 | -159.4826 | -0.243848  | 0.4435383 | CXorf36   |
| cg11061975 | 0.2964078 | -159.4216 | -0.2503718 | 0.5467796 | SIRPB2    |
| cg24101873 | 0.5719876 | -159.3596 | -0.2093578 | 0.7813454 | C20orf70  |
| cg02202484 | 0.3684264 | -159.2696 | -0.2468983 | 0.6153247 | SPRR4     |
| cg01185080 | 0.2997031 | -159.161  | -0.2501658 | 0.5498688 | ZNF710    |
| cg26916607 | 0.5551162 | -159.1416 | -0.2136946 | 0.7688109 | CETP      |
| cg10586756 | 0.4437551 | -159.1181 | -0.2372501 | 0.6810052 | NUP93     |
| cg00093177 | 0.5491419 | -159.0571 | -0.2151712 | 0.7643131 | FLJ43826  |
| cg23464269 | 0.2931219 | -158.7968 | -0.2499096 | 0.5430315 | UGT1A3    |
| cg14437986 | 0.3688639 | -158.7565 | -0.2465079 | 0.6153718 | C6orf25   |
| cg18719571 | 0.4406497 | -158.7557 | -0.237525  | 0.6781747 | DTNBP1    |
| cg11520395 | 0.3037192 | -158.6633 | -0.2497574 | 0.5534766 | JMJD4     |
| cg26229648 | 0.5927014 | -158.6633 | -0.2032524 | 0.7959538 | CNTF      |
| cg02721374 | 0.4536108 | -158.2399 | -0.2350616 | 0.6886724 | OR1D2     |
| cg19998328 | 0.3152356 | -158.2113 | -0.249221  | 0.5644566 | LOC90580  |
| cg21301440 | 0.1178738 | -158.2    | -0.2237603 | 0.3416341 | CYGB      |
| cg08390209 | 0.3374497 | -158.0502 | -0.2482362 | 0.5856858 | CDKN2B    |
| cg21307628 | 0.4280135 | -158.0025 | -0.2390004 | 0.6670139 | URB       |
| cg10919204 | 0.1802972 | -157.9088 | -0.2393569 | 0.4196541 | CDH6      |
| cg20579480 | 0.3285437 | -157.8104 | -0.2484841 | 0.5770279 | APOBEC4   |
| cg01248426 | 0.191251  | -157.7741 | -0.2411531 | 0.432404  | ATP6V0D2  |
| cg24110063 | 0.1685046 | -157.7277 | -0.2368787 | 0.4053833 | COX6A2    |
| cg13118849 | 0.5656291 | -157.7023 | -0.2102007 | 0.7758297 | CSPG3     |
| cg02876062 | 0.6013232 | -157.5644 | -0.2002339 | 0.8015572 | FAM107B   |
| cg01861509 | 0.4406856 | -157.4112 | -0.2366813 | 0.6773669 | SPOCK2    |
| cg04655481 | 0.4704945 | -157.3528 | -0.2314987 | 0.7019932 | GPR21     |
| cg00852964 | 0.2622812 | -157.157  | -0.2479387 | 0.5102199 | VNN1      |
| cg05786601 | 0.2662866 | -156.8856 | -0.2479097 | 0.5141963 | AR        |
| cg25142416 | 0.4640324 | -156.7907 | -0.232347  | 0.6963794 | CA1       |
| cg02149446 | 0.153374  | -156.66   | -0.2325839 | 0.3859579 | C5AR1     |
| cg21529807 | 0.1098102 | -156.5929 | -0.2196372 | 0.3294475 | CEACAM4   |
| cg14652095 | 0.2635574 | -156.5452 | -0.2475328 | 0.5110902 | HIST1H1A  |
| cg08816023 | 0.2878585 | -156.5387 | -0.2481984 | 0.5360569 | FGF1      |
| cg14117297 | 0.2771807 | -156.5058 | -0.2479782 | 0.5251589 | MGC23244  |
| cg22289837 | 0.1245713 | -156.3666 | -0.2243538 | 0.3489251 | CA3       |
| cg02184413 | 0.4313079 | -156.2167 | -0.2373777 | 0.6686856 | VNN1      |
| cg10414946 | 0.3880524 | -156.1927 | -0.242907  | 0.6309593 | MS4A2     |
| cg06852652 | 0.5372979 | -156.0451 | -0.2164688 | 0.7537667 | CYP2C18   |
| cg24484296 | 0.373176  | -156.0449 | -0.2442686 | 0.6174446 | ZFPL      |
| cg21789545 | 0.2309278 | -156.0313 | -0.2448502 | 0.475778  | COL9A1    |

|            |            |           |            |           |           |
|------------|------------|-----------|------------|-----------|-----------|
| cg05696092 | 0.2392498  | -155.9581 | -0.2455296 | 0.4847794 | NOSIP     |
| cg19585882 | 0.5477854  | -155.8742 | -0.2138082 | 0.7615936 | SSX1      |
| cg18466173 | 0.5606778  | -155.8508 | -0.2105253 | 0.771203  | C21orf93  |
| cg22025233 | 0.3915119  | -155.8463 | -0.2422902 | 0.6338021 | CYP2W1    |
| cg19824441 | 0.3880091  | -155.7487 | -0.2426013 | 0.6306103 | ADMR      |
| cg25650811 | 0.4304392  | -155.7413 | -0.23719   | 0.6676292 | LOC223075 |
| cg02298612 | 0.582894   | -155.5929 | -0.2044606 | 0.7873546 | CHST6     |
| cg17031773 | 0.2836988  | -155.5818 | -0.2474036 | 0.5311024 | KLK9      |
| cg04558553 | 0.2417903  | -155.4845 | -0.2453544 | 0.4871447 | UGT2B7    |
| cg12554476 | 0.4526368  | -155.4326 | -0.2334814 | 0.6861182 | GP2       |
| cg09748960 | 0.2496582  | -155.4064 | -0.24586   | 0.4955182 | BTNL2     |
| cg15746187 | 0.4116555  | -155.3761 | -0.2395603 | 0.6512157 | FBXO44    |
| cg13088755 | 0.3303733  | -155.2614 | -0.2465622 | 0.5769354 | P2RY10    |
| cg14003512 | 0.2795732  | -155.2083 | -0.2470344 | 0.5266076 | PLGLB2    |
| cg17463527 | 0.5745652  | -155.0355 | -0.2064356 | 0.7810008 | SGK2      |
| cg23152755 | 0.3123273  | -154.9441 | -0.246884  | 0.5592114 | DEFB105A  |
| cg02657438 | 0.3584451  | -154.7914 | -0.2446018 | 0.603047  | STON2     |
| cg15830940 | 0.3192418  | -154.776  | -0.2465966 | 0.5658384 | SMARCAL1  |
| cg22960952 | 0.2441957  | -154.7417 | -0.2449492 | 0.4891449 | FLJ23657  |
| cg08831522 | 0.3651517  | -154.6616 | -0.2439904 | 0.6091421 | ATP10A    |
| cg21755709 | 0.2334197  | -154.2336 | -0.2436513 | 0.477071  | C21orf124 |
| cg20342105 | 0.254082   | -154.1629 | -0.2451699 | 0.4992518 | BSCL2     |
| cg11854877 | 0.2813659  | -154.0562 | -0.2462004 | 0.5275664 | F8A1      |
| cg12891678 | 0.1745599  | -153.8348 | -0.2348739 | 0.4094338 | SPRR2D    |
| cg24269657 | 0.5601491  | -153.6248 | -0.2094823 | 0.7696313 | F7        |
| cg04200192 | 0.5470331  | -153.2411 | -0.212572  | 0.7596051 | HTR3D     |
| cg17067005 | 0.5455707  | -153.2106 | -0.2129129 | 0.7584836 | IL10      |
| cg18059223 | 0.3742292  | -153.1723 | -0.2421978 | 0.616427  | NALP2     |
| cg05379350 | 0.1690051  | -152.9878 | -0.2330381 | 0.4020432 | GIT1      |
| cg08815403 | 0.3298166  | -152.8707 | -0.2448675 | 0.5746841 | HSD17B13  |
| cg00983899 | 0.3976081  | -152.7928 | -0.2395652 | 0.6371733 | CABP2     |
| cg02688643 | 0.491717   | -152.7793 | -0.2246635 | 0.7163805 | MGST2     |
| cg12639234 | 0.3127617  | -152.5878 | -0.2451508 | 0.5579125 | NAT2      |
| cg06417962 | 0.3780621  | -152.4418 | -0.2413458 | 0.619408  | RNH1      |
| cg09548084 | 0.3335975  | -152.3799 | -0.2443539 | 0.5779514 | SLC35B3   |
| cg01138020 | 0.3135263  | -152.3304 | -0.2449456 | 0.5584719 | MGC29671  |
| cg00406188 | 0.3811324  | -152.3195 | -0.2409683 | 0.6221007 | LCE2C     |
| cg10173723 | 0.5901434  | -152.2726 | -0.200776  | 0.7909194 | KRT25C    |
| cg18675600 | 0.3258607  | -152.2129 | -0.244528  | 0.5703887 | PTP4A3    |
| cg16547341 | 0.2238897  | -152.0791 | -0.2409723 | 0.4648619 | USP29     |
| cg03900284 | 0.5003391  | -151.9483 | -0.2224136 | 0.7227527 | P518      |
| cg12397274 | 0.2288363  | -151.9259 | -0.2413679 | 0.4702042 | TINAG     |
| cg12781568 | 0.3123246  | -151.9005 | -0.2446424 | 0.556967  | WT1       |
| cg25462291 | 0.1408266  | -151.7955 | -0.2252031 | 0.3660297 | HEYL      |
| cg14132995 | 0.09991955 | -151.7598 | -0.2117944 | 0.311714  | SLC35A2   |

|            |            |           |            |           |           |
|------------|------------|-----------|------------|-----------|-----------|
| cg10710439 | 0.2062771  | -151.6464 | -0.2384197 | 0.4446968 | FLJ37549  |
| cg12493906 | 0.3147737  | -151.5382 | -0.2443259 | 0.5590996 | MMP26     |
| cg21132577 | 0.1752801  | -151.5128 | -0.2330758 | 0.4083559 | MYOM2     |
| cg15703357 | 0.3543327  | -151.4916 | -0.2425636 | 0.5968962 | LINCR     |
| cg12019109 | 0.346241   | -151.4402 | -0.2430269 | 0.5892678 | AZGP1     |
| cg02046017 | 0.2290008  | -151.3488 | -0.2409112 | 0.469912  | LOC220070 |
| cg13396068 | 0.4200818  | -151.2254 | -0.235721  | 0.6558028 | DCD       |
| cg24870391 | 0.2535776  | -151.1246 | -0.2427543 | 0.4963319 | CCL11     |
| cg21652958 | 0.09934401 | -151.0413 | -0.2109358 | 0.3102798 | THBS2     |
| cg20436912 | 0.3185941  | -150.8766 | -0.2437438 | 0.5623379 | SEC14L4   |
| cg22496683 | 0.3516303  | -150.8161 | -0.2422517 | 0.593882  | MGC27016  |
| cg01507173 | 0.395797   | -150.8147 | -0.2384124 | 0.6342095 | IL1F5     |
| cg04872051 | 0.3018103  | -150.8038 | -0.2439152 | 0.5457255 | CHST7     |
| cg07426848 | 0.488302   | -150.6892 | -0.2240735 | 0.7123755 | S100A3    |
| cg11432797 | 0.4663437  | -150.6655 | -0.2281464 | 0.6944901 | SPN       |
| cg17078393 | 0.5870589  | -150.6126 | -0.2007642 | 0.7878231 | LCK       |
| cg06255227 | 0.5738192  | -150.532  | -0.2042795 | 0.7780986 | NPBWR2    |
| cg22396129 | 0.2422813  | -150.5201 | -0.2414466 | 0.4837278 | ZCRB1     |
| cg09551916 | 0.2859957  | -150.419  | -0.2435002 | 0.529496  | CFHR2     |
| cg03221914 | 0.1550327  | -150.3719 | -0.2276335 | 0.3826661 | HIST1H2AJ |
| cg06619299 | 0.572544   | -150.2821 | -0.2044802 | 0.7770241 | GMCL1L    |
| cg01356829 | 0.4691005  | -150.2611 | -0.2274001 | 0.6965006 | IL12RB2   |
| cg01227519 | 0.5798523  | -150.2129 | -0.2025039 | 0.7823561 | SPANXD    |
| cg01192952 | 0.26468    | -150.1873 | -0.2426155 | 0.5072955 | LGALS14   |
| cg07846167 | 0.1150428  | -150.1779 | -0.2158636 | 0.3309064 | FBLIM1    |
| cg07193504 | 0.3765666  | -150.1313 | -0.2398472 | 0.6164138 | SRP9      |
| cg09923855 | 0.2951431  | -150.0941 | -0.2433517 | 0.5384948 | HTATSF1   |
| cg25410053 | 0.3210398  | -150.0709 | -0.2430636 | 0.5641034 | ZIC3      |
| cg09120035 | 0.3541225  | -150.0597 | -0.2415299 | 0.5956524 | CYP11B1   |
| cg25545210 | 0.4578915  | -149.9428 | -0.2291397 | 0.6870312 | KRTHA4    |
| cg19241311 | 0.3514672  | -149.5591 | -0.2413432 | 0.5928104 | DEFB123   |
| cg19067730 | 0.09023859 | -149.3628 | -0.2058074 | 0.296046  | PPGB      |
| cg14841098 | 0.1361317  | -149.3206 | -0.2217272 | 0.357859  | SLC9A7    |
| cg20856834 | 0.395326   | -149.2694 | -0.2373936 | 0.6327196 | OR12D3    |
| cg26895595 | 0.2630136  | -149.0614 | -0.2416467 | 0.5046603 | MAGEB3    |
| cg06210526 | 0.5002136  | -148.9653 | -0.2206494 | 0.7208629 | CYP2F1    |
| cg05564251 | 0.538348   | -148.8062 | -0.2121804 | 0.7505285 | SP140     |
| cg10099900 | 0.4776057  | -148.797  | -0.2249455 | 0.7025512 | PSMF1     |
| cg20857253 | 0.199378   | -148.7162 | -0.2349595 | 0.4343375 | TCP10L    |
| cg22182945 | 0.4113809  | -148.7003 | -0.2351435 | 0.6465244 | NYD-SP26  |
| cg13633026 | 0.3162775  | -148.6491 | -0.2421137 | 0.5583913 | MS4A8B    |
| cg13745346 | 0.4462832  | -148.6446 | -0.2302006 | 0.6764838 | CBFA2T3   |
| cg21885995 | 0.3815599  | -148.4947 | -0.2382455 | 0.6198054 | SRP68     |
| cg14533138 | 0.4927489  | -148.2397 | -0.2217116 | 0.7144605 | KRTHA3B   |
| cg25890048 | 0.4317595  | -148.1793 | -0.2320765 | 0.6638361 | OR5I1     |

|            |           |           |            |           |           |
|------------|-----------|-----------|------------|-----------|-----------|
| cg22986999 | 0.1400547 | -148.0791 | -0.2217606 | 0.3618154 | MRGPRF    |
| cg26777475 | 0.3579997 | -148.0717 | -0.2398469 | 0.5978466 | PCOLCE    |
| cg11811840 | 0.3850173 | -147.8648 | -0.2374769 | 0.6224942 | UGT1A1    |
| cg19229991 | 0.4800247 | -147.7727 | -0.2238618 | 0.7038866 | FLJ22655  |
| cg12268344 | 0.5530353 | -147.7569 | -0.2080628 | 0.7610981 | PRM1      |
| cg01359534 | 0.5439578 | -147.6295 | -0.2101874 | 0.7541453 | AQP10     |
| cg08711674 | 0.2613946 | -147.6231 | -0.2404167 | 0.5018114 | AKT1S1    |
| cg22580353 | 0.1478067 | -147.5805 | -0.2234087 | 0.3712154 | PVR       |
| cg07434382 | 0.3860631 | -147.3886 | -0.2370416 | 0.6231046 | LOC348174 |
| cg10517312 | 0.253154  | -147.2693 | -0.239637  | 0.492791  | RNF36     |
| cg07378350 | 0.216902  | -147.0818 | -0.2360395 | 0.4529415 | GDF5      |
| cg20176648 | 0.2351333 | -147.0034 | -0.2379679 | 0.4731012 | AQP1      |
| cg08159444 | 0.134385  | -146.8138 | -0.2190439 | 0.353429  | PNMA5     |
| cg14726637 | 0.1006268 | -146.7947 | -0.2076808 | 0.3083076 | CR1       |
| cg11328541 | 0.1837315 | -146.7612 | -0.2306578 | 0.4143894 | OR7C1     |
| cg07581973 | 0.2048223 | -146.7089 | -0.2340926 | 0.4389149 | PRDX4     |
| cg17040807 | 0.1529974 | -146.6282 | -0.2239034 | 0.3769008 | CYGB      |
| cg08088390 | 0.1795399 | -146.3545 | -0.2295212 | 0.409061  | DEFB125   |
| cg25107791 | 0.3383541 | -146.2435 | -0.239609  | 0.5779631 | CLPS      |
| cg08965337 | 0.1472754 | -146.1714 | -0.2220494 | 0.3693248 | RAP2C     |
| cg07197059 | 0.1654985 | -146.1145 | -0.2264024 | 0.3919009 | EFS       |
| cg27244482 | 0.2731416 | -145.9511 | -0.2396367 | 0.5127783 | CAMK2A    |
| cg26232558 | 0.4663299 | -145.9511 | -0.2251709 | 0.6915008 | OR3A1     |
| cg02388150 | 0.1279383 | -145.469  | -0.2159293 | 0.3438676 | SFRP1     |
| cg05788638 | 0.4773603 | -145.1095 | -0.2226937 | 0.7000539 | SERPINA10 |
| cg06812844 | 0.2995237 | -145.0517 | -0.2395009 | 0.5390247 | TRPM2     |
| cg06026755 | 0.5625256 | -145.0284 | -0.2042062 | 0.7667317 | CEP27     |
| cg03941108 | 0.3538001 | -144.9751 | -0.237866  | 0.5916662 | C1QB      |
| cg11233153 | 0.1728939 | -144.9419 | -0.2269838 | 0.3998777 | SLC10A3   |
| cg11267879 | 0.3235747 | -144.7515 | -0.2390064 | 0.5625811 | CYP2F1    |
| cg03872376 | 0.4027525 | -144.5061 | -0.2332861 | 0.6360386 | ZP4       |
| cg17461214 | 0.5364702 | -144.4934 | -0.2101498 | 0.74662   | CHML      |
| cg11710560 | 0.5564171 | -144.4346 | -0.2053825 | 0.7617996 | KRTAP9-3  |
| cg15383120 | 0.1313437 | -144.333  | -0.2159635 | 0.3473071 | DUSP22    |
| cg25949363 | 0.1910587 | -144.2989 | -0.2298709 | 0.4209296 | TMEM92    |
| cg19554294 | 0.3775205 | -144.2245 | -0.2355769 | 0.6130974 | VN1R2     |
| cg27345534 | 0.3158865 | -144.1038 | -0.238664  | 0.5545505 | PRB2      |
| cg03870261 | 0.1396333 | -144.0941 | -0.2181566 | 0.3577899 | TIMM13    |
| cg23540651 | 0.3486396 | -144.0392 | -0.2374625 | 0.5861021 | GBP3      |
| cg25866075 | 0.2677559 | -143.9838 | -0.2378218 | 0.5055777 | NALP12    |
| cg06277657 | 0.2433434 | -143.9838 | -0.2362205 | 0.4795639 | DGKI      |
| cg01309152 | 0.3242406 | -143.9451 | -0.2383627 | 0.5626033 | PCP4      |
| cg27168844 | 0.4012647 | -143.8968 | -0.233013  | 0.6342776 | IL17      |
| cg15417244 | 0.4970275 | -143.8216 | -0.2181543 | 0.7151818 | PDZRN4    |
| cg06545504 | 0.4347506 | -143.7397 | -0.2286847 | 0.6634353 | HTN1      |

|            |           |           |            |           |           |
|------------|-----------|-----------|------------|-----------|-----------|
| cg00174500 | 0.2480535 | -143.7363 | -0.2363905 | 0.4844441 | CMTM5     |
| cg04180953 | 0.170699  | -143.6626 | -0.2254007 | 0.3960997 | DSC1      |
| cg16381688 | 0.3108299 | -143.574  | -0.2383075 | 0.5491374 | THEM2     |
| cg07897701 | 0.5251635 | -143.516  | -0.2121056 | 0.7372691 | ABP1      |
| cg24147596 | 0.4236301 | -143.509  | -0.2300442 | 0.6536743 | ARL14     |
| cg18374517 | 0.4764771 | -143.3914 | -0.2217467 | 0.6982238 | ALPPL2    |
| cg21550442 | 0.2531966 | -143.2005 | -0.2363298 | 0.4895264 | FLJ36445  |
| cg16269097 | 0.1567384 | -143.1929 | -0.2218208 | 0.3785592 | CASK      |
| cg00308665 | 0.2288575 | -143.1111 | -0.2341073 | 0.4629648 | HTR2A     |
| cg24304714 | 0.2063323 | -143.1111 | -0.2312677 | 0.4376    | LCE1C     |
| cg14345281 | 0.1509641 | -143.0439 | -0.2202531 | 0.3712171 | NHS       |
| cg24546463 | 0.2286995 | -142.876  | -0.2338947 | 0.4625942 | MGC39715  |
| cg00953256 | 0.4207458 | -142.8701 | -0.2299805 | 0.6507263 | CCND1     |
| cg22082462 | 0.5472254 | -142.7444 | -0.2066253 | 0.7538508 | CPNE6     |
| cg05730092 | 0.536335  | -142.6583 | -0.2091018 | 0.7454368 | KIAA1446  |
| cg13461622 | 0.4177557 | -142.6077 | -0.2301781 | 0.6479338 | RUNX3     |
| cg00371195 | 0.5703713 | -142.2528 | -0.2006831 | 0.7710544 | F2        |
| cg02436686 | 0.2318091 | -142.1012 | -0.2335803 | 0.4653894 | GMFG      |
| cg24054653 | 0.1568248 | -142.0983 | -0.2208854 | 0.3777102 | C1GALT1C1 |
| cg24779040 | 0.2859702 | -142.0776 | -0.2369465 | 0.5229167 | TSPYL2    |
| cg12067287 | 0.5512779 | -142.0683 | -0.2052759 | 0.7565538 | MYOM1     |
| cg26158194 | 0.4923005 | -142.0671 | -0.217978  | 0.7102786 | LSP1      |
| cg02656594 | 0.1786712 | -142.0636 | -0.2256403 | 0.4043115 | IL21R     |
| cg18123948 | 0.1030478 | -141.9098 | -0.2042271 | 0.3072748 | GATA4     |
| cg24387818 | 0.2457106 | -141.7364 | -0.2345493 | 0.48026   | POF1B     |
| cg16051685 | 0.5240119 | -141.6119 | -0.2112126 | 0.7352245 | TRIM63    |
| cg18133957 | 0.1387909 | -141.4952 | -0.2155962 | 0.3543871 | APC2      |
| cg23207527 | 0.5157523 | -141.4287 | -0.2128648 | 0.7286171 | RBM24     |
| cg14457691 | 0.1511281 | -141.0403 | -0.2185173 | 0.3696454 | ARMCX4    |
| cg08798116 | 0.1639538 | -140.7594 | -0.2213716 | 0.3853254 | GPC4      |
| cg01975392 | 0.1622689 | -140.7142 | -0.2209441 | 0.383213  | LANCL3    |
| cg03014957 | 0.3311475 | -140.4576 | -0.2354874 | 0.5666349 | DEFB118   |
| cg25450806 | 0.5510874 | -140.4444 | -0.2043828 | 0.7554702 | PRDM2     |
| cg12032049 | 0.4084527 | -140.3757 | -0.2297236 | 0.6381763 | LPO       |
| cg06256735 | 0.2155986 | -140.3082 | -0.2301532 | 0.4457518 | MFAP5     |
| cg16150435 | 0.4979269 | -140.2662 | -0.2157556 | 0.7136825 | C6orf15   |
| cg11806565 | 0.1634731 | -139.864  | -0.2204735 | 0.3839466 | PHKA1     |
| cg02148711 | 0.1946161 | -139.7905 | -0.2265769 | 0.421193  | ATRX      |
| cg08575950 | 0.4632433 | -139.7288 | -0.2216373 | 0.6848806 | FLJ14503  |
| cg25994725 | 0.3269959 | -139.7201 | -0.2350306 | 0.5620265 | C6orf81   |
| cg10478221 | 0.2805313 | -139.6441 | -0.2348198 | 0.5153511 | WFIKKN1   |
| cg13322449 | 0.2199444 | -139.5563 | -0.2300656 | 0.45001   | CEACAM3   |
| cg25933726 | 0.2388191 | -139.4866 | -0.2320615 | 0.4708806 | RPGR      |
| cg23282949 | 0.4291357 | -139.4665 | -0.22653   | 0.6556656 | RENBP     |
| cg16148454 | 0.5382012 | -139.0245 | -0.2065277 | 0.7447289 | TMED6     |

|            |           |           |            |           |          |
|------------|-----------|-----------|------------|-----------|----------|
| cg27583102 | 0.4610571 | -138.7727 | -0.2213565 | 0.6824136 | KLK5     |
| cg02017155 | 0.2559213 | -138.7529 | -0.2328345 | 0.4887558 | FFAR3    |
| cg08403419 | 0.4199518 | -138.6893 | -0.2271661 | 0.647118  | RLN3R2   |
| cg15977272 | 0.2823179 | -138.4606 | -0.2339163 | 0.5162343 | EFNB1    |
| cg26128441 | 0.336075  | -138.4265 | -0.2337498 | 0.5698249 | P2RX3    |
| cg18799866 | 0.2224857 | -138.4265 | -0.2294109 | 0.4518966 | SLC9A7   |
| cg16609872 | 0.2419634 | -138.358  | -0.231399  | 0.4733625 | KCNQ1    |
| cg26457013 | 0.4015389 | -138.3243 | -0.2290142 | 0.6305531 | TMEM86B  |
| cg12593411 | 0.3998239 | -138.2721 | -0.2291552 | 0.6289791 | ANGPTL6  |
| cg20922422 | 0.1560498 | -137.8902 | -0.2169528 | 0.3730026 | PCYT1B   |
| cg23704362 | 0.3141529 | -137.8764 | -0.2338011 | 0.547954  | C8orf46  |
| cg19521927 | 0.4239737 | -137.8672 | -0.2260818 | 0.6500555 | PLA2G5   |
| cg04184278 | 0.4110281 | -137.6795 | -0.2275051 | 0.6385332 | GYS2     |
| cg13473336 | 0.4570079 | -137.6662 | -0.2212512 | 0.6782591 | SLC5A2   |
| cg23324787 | 0.3874058 | -137.5253 | -0.2298102 | 0.617216  | RAG2     |
| cg00436282 | 0.5379537 | -137.3753 | -0.2055952 | 0.7435489 | STATH    |
| cg04057858 | 0.3742607 | -137.3616 | -0.2307849 | 0.6050456 | UNQ9391  |
| cg19382175 | 0.5173048 | -137.3616 | -0.2100416 | 0.7273464 | PDE6A    |
| cg07478122 | 0.3898567 | -137.2379 | -0.2293746 | 0.6192313 | HBII-13  |
| cg10051054 | 0.5367434 | -136.9331 | -0.2056021 | 0.7423455 | CCDC27   |
| cg24926780 | 0.2355314 | -136.8605 | -0.2295133 | 0.4650446 | OR10H2   |
| cg07374632 | 0.2234748 | -136.8316 | -0.2281569 | 0.4516317 | PCSK1N   |
| cg13131015 | 0.2821915 | -136.7722 | -0.2325222 | 0.5147137 | GUCY2C   |
| cg04761824 | 0.4791474 | -136.6164 | -0.216879  | 0.6960264 | 30-nov   |
| cg14620221 | 0.5417415 | -136.4685 | -0.2042019 | 0.7459434 | OR8B8    |
| cg10787197 | 0.3396055 | -136.4306 | -0.2320672 | 0.5716727 | C6orf105 |
| cg27554782 | 0.1146156 | -136.4306 | -0.2034435 | 0.3180591 | CHRN4    |
| cg20169062 | 0.2124573 | -136.4239 | -0.2263744 | 0.4388317 | HSPB3    |
| cg01080862 | 0.2081636 | -136.3773 | -0.2257219 | 0.4338855 | IL13RA1  |
| cg16175792 | 0.3133605 | -136.2589 | -0.2325105 | 0.5458711 | HSD3B1   |
| cg00071250 | 0.3765863 | -136.2344 | -0.2297604 | 0.6063467 | FASLG    |
| cg07974891 | 0.29629   | -136.0594 | -0.2322772 | 0.5285671 | ITGB1BP1 |
| cg26379475 | 0.2263527 | -136.0255 | -0.2277956 | 0.4541482 | SH2D1B   |
| cg11656547 | 0.1114426 | -135.9732 | -0.2019127 | 0.3133553 | MAMDC2   |
| cg22780475 | 0.3497267 | -135.7655 | -0.231109  | 0.5808358 | CBLC     |
| cg16343842 | 0.156277  | -135.6637 | -0.2149995 | 0.3712764 | CD99L2   |
| cg06469542 | 0.3976184 | -135.6561 | -0.2274652 | 0.6250837 | THSD3    |
| cg05740244 | 0.2508841 | -135.5476 | -0.2297587 | 0.4806428 | LDHC     |
| cg18920846 | 0.5029545 | -135.5434 | -0.2117744 | 0.714729  | ASCL3    |
| cg03573747 | 0.4630949 | -135.5071 | -0.2188224 | 0.6819173 | ADIPOQ   |
| cg13311440 | 0.2832767 | -135.5057 | -0.2315021 | 0.5147789 | CD48     |
| cg24623694 | 0.229826  | -135.4901 | -0.2277163 | 0.4575422 | PRX      |
| cg18312429 | 0.3192517 | -135.487  | -0.2318246 | 0.5510763 | SLC10A2  |
| cg22833175 | 0.2684715 | -135.4635 | -0.2308292 | 0.4993008 | WBP11    |
| cg12687463 | 0.2895101 | -135.4299 | -0.2316125 | 0.5211226 | CFHR1    |

|            |           |           |            |           |           |
|------------|-----------|-----------|------------|-----------|-----------|
| cg08130265 | 0.32945   | -135.3191 | -0.2314907 | 0.5609407 | C15orf5   |
| cg18942631 | 0.2290509 | -135.3018 | -0.2274571 | 0.456508  | CASQ2     |
| cg01346718 | 0.1787889 | -135.1946 | -0.219577  | 0.3983659 | CSNK1E    |
| cg12629515 | 0.2503232 | -135.1894 | -0.2293876 | 0.4797108 | HIST1H2BO |
| cg21474838 | 0.4514299 | -134.8477 | -0.220169  | 0.6715989 | KLRD1     |
| cg14176836 | 0.2308126 | -134.7145 | -0.2271467 | 0.4579593 | ITGAL     |
| cg26738010 | 0.5336511 | -134.6456 | -0.2048735 | 0.7385246 | CETN1     |
| cg06817269 | 0.4518326 | -134.6427 | -0.2199657 | 0.6717983 | GCNT3     |
| cg22879289 | 0.3036336 | -134.6172 | -0.2311622 | 0.5347958 | NID1      |
| cg19464252 | 0.2765341 | -134.5136 | -0.2304112 | 0.5069454 | FBS1      |
| cg15552238 | 0.2533045 | -134.4429 | -0.2289838 | 0.4822883 | EMR3      |
| cg16855440 | 0.3767777 | -134.4402 | -0.2283728 | 0.6051506 | KLC3      |
| cg26661623 | 0.4085289 | -134.3867 | -0.2253808 | 0.6339096 | ASGR2     |
| cg24642820 | 0.504107  | -134.2769 | -0.210721  | 0.714828  | NUP210    |
| cg13588835 | 0.4650913 | -134.2737 | -0.2176464 | 0.6827377 | LGALS7    |
| cg11380128 | 0.5278329 | -134.0006 | -0.2057216 | 0.7335544 | PRLH      |
| cg19937039 | 0.1987301 | -133.8854 | -0.2220366 | 0.4207667 | SERPINA10 |
| cg01375871 | 0.2651354 | -133.8268 | -0.2292486 | 0.4943841 | TPSD1     |
| cg02332537 | 0.4675421 | -133.7292 | -0.2168812 | 0.6844233 | RTP3      |
| cg02633817 | 0.4687548 | -133.7133 | -0.2166715 | 0.6854264 | FXD3      |
| cg26233253 | 0.4016889 | -133.685  | -0.2255813 | 0.6272702 | SLC35E4   |
| cg04317399 | 0.1376502 | -133.3707 | -0.2079014 | 0.3455516 | HOXA4     |
| cg16003238 | 0.1754233 | -133.3035 | -0.2171787 | 0.392602  | PUNC      |
| cg16504670 | 0.4933669 | -133.1172 | -0.2119913 | 0.7053581 | FLJ20186  |
| cg19963797 | 0.1194283 | -133.1128 | -0.201997  | 0.3214253 | GLT28D1   |
| cg07258507 | 0.3063383 | -133.0748 | -0.2299021 | 0.5362405 | IL17E     |
| cg08942800 | 0.1774896 | -133.0248 | -0.2173513 | 0.3948409 | CRISP2    |
| cg06885782 | 0.2599989 | -132.9938 | -0.228209  | 0.4882079 | KCNQ4     |
| cg27337148 | 0.213447  | -132.5818 | -0.2231075 | 0.4365545 | CAMK1G    |
| cg22332306 | 0.3398844 | -132.5634 | -0.2289784 | 0.5688628 | C3orf63   |
| cg09971646 | 0.1898645 | -132.5089 | -0.2192709 | 0.4091354 | DLK1      |
| cg07876586 | 0.1853281 | -132.26   | -0.2182121 | 0.4035402 | PGRMC1    |
| cg25410279 | 0.1288418 | -132.2316 | -0.20422   | 0.3330618 | DXS9879E  |
| cg21533271 | 0.1477914 | -132.2175 | -0.2096597 | 0.3574512 | PLXNA3    |
| cg23855121 | 0.2535597 | -132.0945 | -0.226982  | 0.4805417 | TLR10     |
| cg25427638 | 0.3869058 | -132.0485 | -0.2257326 | 0.6126384 | CYP2A7    |
| cg17169998 | 0.1265117 | -131.9835 | -0.2032551 | 0.3297668 | MLC1      |
| cg02096520 | 0.5053274 | -131.9178 | -0.2089517 | 0.7142791 | FGF16     |
| cg26135325 | 0.4745199 | -131.7008 | -0.214345  | 0.6888649 | LCE3A     |
| cg16567044 | 0.336175  | -131.6666 | -0.228376  | 0.564551  | MEG3      |
| cg20322977 | 0.2775392 | -131.3523 | -0.2277825 | 0.5053217 | CYP26C1   |
| cg03641225 | 0.2118124 | -131.1253 | -0.2215844 | 0.4333968 | DIRAS3    |
| cg15480475 | 0.515356  | -131.0477 | -0.2064244 | 0.7217804 | TUB       |
| cg13482233 | 0.4990617 | -131.0376 | -0.2095675 | 0.7086292 | HEPH      |
| cg17839611 | 0.5039102 | -130.8395 | -0.208524  | 0.7124342 | GNGT2     |



|            |           |           |            |           |           |
|------------|-----------|-----------|------------|-----------|-----------|
| cg12200412 | 0.1642312 | -130.7021 | -0.212361  | 0.3765922 | CD1E      |
| cg23661676 | 0.3143349 | -130.6752 | -0.2279432 | 0.5422781 | GPR42     |
| cg11511443 | 0.2400878 | -130.6749 | -0.2245747 | 0.4646626 | LMO3      |
| cg11812202 | 0.4370045 | -130.4453 | -0.2190843 | 0.6560888 | PNLIP     |
| cg02964385 | 0.2720962 | -130.2993 | -0.2266302 | 0.4987263 | STK38     |
| cg26414720 | 0.5045059 | -130.2496 | -0.2080227 | 0.7125286 | MAGEA1    |
| cg26091981 | 0.5047624 | -130.2383 | -0.2079652 | 0.7127276 | LCT       |
| cg26185508 | 0.4653139 | -130.1152 | -0.2147517 | 0.6800656 | CDCP2     |
| cg24459209 | 0.4149812 | -130.0366 | -0.2214689 | 0.6364501 | PRG3      |
| cg24010336 | 0.2068648 | -130.0339 | -0.2198771 | 0.4267419 | FBXO17    |
| cg04344997 | 0.2665379 | -130.0226 | -0.2260804 | 0.4926183 | EMD       |
| cg24252809 | 0.3726349 | -129.9543 | -0.225221  | 0.5978559 | MRGPRX1   |
| cg26561254 | 0.1664289 | -129.9173 | -0.2121393 | 0.3785682 | ISG20L1   |
| cg05376954 | 0.248924  | -129.9118 | -0.2247094 | 0.4736334 | FPR1      |
| cg21045917 | 0.3965858 | -129.4864 | -0.2229322 | 0.619518  | ALAS2     |
| cg05206587 | 0.2966186 | -129.4157 | -0.2267514 | 0.5233699 | GLRA2     |
| cg08356693 | 0.3123693 | -129.3429 | -0.2268449 | 0.5392143 | ITLN1     |
| cg12351042 | 0.4287351 | -129.2955 | -0.2193071 | 0.6480422 | OR2B2     |
| cg07428182 | 0.209702  | -129.2818 | -0.2196244 | 0.4293264 | PLXNA3    |
| cg20664247 | 0.2426293 | -129.1006 | -0.2234397 | 0.466069  | PEX10     |
| cg01214847 | 0.4192866 | -128.8996 | -0.2201433 | 0.6394299 | TMPRSS3   |
| cg22341310 | 0.2100207 | -128.8771 | -0.2193128 | 0.4293335 | ZNF541    |
| cg05102817 | 0.4603514 | -128.7823 | -0.2145863 | 0.6749377 | RBM18     |
| cg17571782 | 0.1894136 | -128.7755 | -0.2158132 | 0.4052268 | CXorf40A  |
| cg27655855 | 0.4946328 | -128.6358 | -0.2087772 | 0.70341   | CST9L     |
| cg12237269 | 0.503112  | -128.56   | -0.2071634 | 0.7102754 | SLN       |
| cg21808053 | 0.2996776 | -128.3954 | -0.2259409 | 0.5256186 | DIRAS3    |
| cg27413508 | 0.2266098 | -128.2539 | -0.2209552 | 0.447565  | COX4I2    |
| cg07373172 | 0.4173869 | -128.197  | -0.219822  | 0.6372089 | IFNA21    |
| cg16512727 | 0.1761041 | -128.1452 | -0.2126106 | 0.3887147 | C12orf4   |
| cg18123677 | 0.2146274 | -128.0961 | -0.2192509 | 0.4338783 | SERPINI1  |
| cg04828792 | 0.4334655 | -127.8595 | -0.2176521 | 0.6511175 | MX2       |
| cg06277838 | 0.1775126 | -127.8142 | -0.2125966 | 0.3901092 | SLC16A2   |
| cg02947354 | 0.3997765 | -127.7092 | -0.2212618 | 0.6210383 | LOC129530 |
| cg18971671 | 0.4843258 | -127.5509 | -0.2098433 | 0.6941691 | TULP2     |
| cg10795646 | 0.1780808 | -127.4704 | -0.2123952 | 0.390476  | S100A10   |
| cg06154597 | 0.374494  | -127.3565 | -0.2230467 | 0.5975407 | MGC4618   |
| cg25298754 | 0.271777  | -127.2698 | -0.2239827 | 0.4957597 | ZBED2     |
| cg21932814 | 0.2223656 | -127.2632 | -0.2195311 | 0.4418967 | CSTA      |
| cg22909609 | 0.2777573 | -127.2459 | -0.2242591 | 0.5020164 | ITGBL1    |
| cg20017147 | 0.2858282 | -127.1249 | -0.2244836 | 0.5103118 | TEX101    |
| cg15992730 | 0.3115287 | -127.0617 | -0.2249171 | 0.5364458 | GDF3      |
| cg26240939 | 0.4589888 | -126.8753 | -0.2134159 | 0.6724048 | LOC57149  |
| cg02982734 | 0.5182874 | -126.8415 | -0.2030843 | 0.7213718 | MAGEL2    |
| cg25670900 | 0.3457307 | -126.7828 | -0.2240958 | 0.5698264 | ZCCHC5    |

|            |           |           |            |           |          |
|------------|-----------|-----------|------------|-----------|----------|
| cg24660086 | 0.4551592 | -126.7734 | -0.2139035 | 0.6690627 | RGR      |
| cg00958560 | 0.4325894 | -126.667  | -0.2168723 | 0.6494617 | FLJ46481 |
| cg02504280 | 0.4773206 | -126.3064 | -0.2101503 | 0.6874709 | MAGEA12  |
| cg00673191 | 0.2277265 | -126.2915 | -0.2193147 | 0.4470413 | DOPEY2   |
| cg26143719 | 0.1786359 | -126.2    | -0.2113262 | 0.3899621 | C1QTNF6  |
| cg14654731 | 0.4364353 | -126.1371 | -0.2159973 | 0.6524326 | FLJ30834 |
| cg10401803 | 0.1978368 | -125.9592 | -0.2146983 | 0.4125351 | TAF1     |
| cg23075286 | 0.4058289 | -125.9435 | -0.2193204 | 0.6251493 | GALP     |
| cg21991396 | 0.5214104 | -125.9272 | -0.2018608 | 0.7232713 | CIAS1    |
| cg02611282 | 0.2312441 | -125.396  | -0.2189279 | 0.450172  | CREB5    |
| cg19526600 | 0.4394251 | -125.1987 | -0.2149294 | 0.6543545 | DIO1     |
| cg21578906 | 0.5216716 | -125.1222 | -0.2012871 | 0.7229587 | SLC5A4   |
| cg13217373 | 0.2016527 | -125.0585 | -0.2145151 | 0.4161678 | RPS6KA2  |
| cg16268563 | 0.4983018 | -125.0326 | -0.2056611 | 0.703963  | ATP6V1G2 |
| cg11762346 | 0.4969354 | -125.0036 | -0.2058847 | 0.7028201 | HKDC1    |
| cg05559445 | 0.2580214 | -124.9377 | -0.2210443 | 0.4790657 | CDKN1C   |
| cg03404502 | 0.453627  | -124.8709 | -0.2127555 | 0.6663825 | GPR18    |
| cg22975712 | 0.4591902 | -124.7923 | -0.2118937 | 0.6710839 | GALR3    |
| cg03742272 | 0.5254032 | -124.6093 | -0.2001985 | 0.7256017 | ALOX12B  |
| cg11787522 | 0.3148147 | -124.2692 | -0.2225713 | 0.5373861 | STRA6    |
| cg20050113 | 0.1920189 | -124.2387 | -0.2120957 | 0.4041146 | SLC9A2   |
| cg03879730 | 0.3545677 | -124.1855 | -0.2216243 | 0.576192  | PSMD4    |
| cg05190718 | 0.4899089 | -124.0583 | -0.2064681 | 0.696377  | CASQ2    |
| cg09998591 | 0.4617698 | -124.0461 | -0.2109731 | 0.672743  | KCNQ1DN  |
| cg08496601 | 0.201571  | -123.9886 | -0.2135064 | 0.4150774 | EBP      |
| cg09801065 | 0.5209592 | -123.9182 | -0.2006248 | 0.721584  | FAT2     |
| cg09584711 | 0.235677  | -123.8523 | -0.2180156 | 0.4536925 | HPR      |
| cg13760253 | 0.4335091 | -123.7761 | -0.2146067 | 0.6481158 | DNAJC5B  |
| cg00134787 | 0.3704179 | -123.6572 | -0.2203526 | 0.5907705 | MYH1     |
| cg06872381 | 0.5168689 | -123.57   | -0.2011901 | 0.718059  | DPPA3    |
| cg20189937 | 0.2726843 | -123.5296 | -0.2207426 | 0.4934269 | L2HGDH   |
| cg05624196 | 0.3642512 | -123.4439 | -0.2205318 | 0.584783  | APOD     |
| cg21631409 | 0.27547   | -123.4117 | -0.220788  | 0.496258  | ALDH3B2  |
| cg03803009 | 0.3702327 | -123.3714 | -0.2201274 | 0.5903602 | GPR142   |
| cg21066636 | 0.2546939 | -123.3714 | -0.219374  | 0.474068  | TM4SF5   |
| cg12654845 | 0.4283964 | -123.283  | -0.2148421 | 0.6432385 | CLDN2    |
| cg09076077 | 0.3754302 | -123.2799 | -0.2197216 | 0.5951518 | FLJ33860 |
| cg26709720 | 0.3257397 | -123.2748 | -0.2216512 | 0.5473909 | B3GALT5  |
| cg17542385 | 0.3196481 | -123.2471 | -0.2216721 | 0.5413202 | LCE4A    |
| cg19062189 | 0.2707928 | -123.2296 | -0.2203582 | 0.491151  | TMSL8    |
| cg26984805 | 0.3186894 | -123.1554 | -0.2215963 | 0.5402857 | TACR2    |
| cg17974185 | 0.339642  | -123.1525 | -0.2212804 | 0.5609224 | CTNBL1   |
| cg16907488 | 0.4441139 | -123.1484 | -0.2127719 | 0.6568857 | CCDC17   |
| cg10124201 | 0.2348276 | -122.9905 | -0.2171168 | 0.4519444 | BOLL     |
| cg03793778 | 0.4088506 | -122.9051 | -0.2166571 | 0.6255078 | LGALS7   |

|            |           |           |            |           |          |
|------------|-----------|-----------|------------|-----------|----------|
| cg22983092 | 0.3763705 | -122.8022 | -0.219263  | 0.5956336 | KRT25A   |
| cg11059341 | 0.3968341 | -122.7089 | -0.2176201 | 0.6144542 | MYL1     |
| cg10885338 | 0.3934495 | -122.6466 | -0.217859  | 0.6113085 | ECRG4    |
| cg08946332 | 0.4483714 | -122.5591 | -0.211759  | 0.6601303 | ALOX12   |
| cg14528319 | 0.2120551 | -122.4428 | -0.2136758 | 0.4257309 | GIPC1    |
| cg07326586 | 0.1497158 | -122.3193 | -0.2008745 | 0.3505903 | UBD      |
| cg27349244 | 0.4389757 | -122.2964 | -0.2127879 | 0.6517636 | MLXIP    |
| cg16536450 | 0.2022378 | -122.2964 | -0.212011  | 0.4142489 | UNQ2541  |
| cg20816612 | 0.2064867 | -122.2308 | -0.2126298 | 0.4191165 | PHKA1    |
| cg02284188 | 0.4791444 | -122.2258 | -0.2069422 | 0.6860866 | TRIM49   |
| cg26922202 | 0.3751629 | -122.2138 | -0.2188563 | 0.5940192 | OR2S2    |
| cg04780454 | 0.3350646 | -122.0504 | -0.2204441 | 0.5555087 | SERPINF2 |
| cg12188416 | 0.2801453 | -121.9725 | -0.219711  | 0.4998563 | TP73L    |
| cg27562023 | 0.4232537 | -121.9725 | -0.2144068 | 0.6376605 | RPH3AL   |
| cg24433189 | 0.1700291 | -121.9319 | -0.2054436 | 0.3754727 | SSTR5    |
| cg02966851 | 0.2686114 | -121.8192 | -0.2189468 | 0.4875581 | C6orf149 |
| cg07950803 | 0.2873658 | -121.798  | -0.2198597 | 0.5072255 | CD1A     |
| cg22325572 | 0.211688  | -121.7855 | -0.2129982 | 0.4246861 | CD53     |
| cg01722450 | 0.4862616 | -121.6519 | -0.2053597 | 0.6916213 | C18orf20 |
| cg23349242 | 0.3042371 | -121.531  | -0.220075  | 0.524312  | SUSD2    |
| cg03014680 | 0.4238408 | -121.4482 | -0.2139345 | 0.6377753 | CLEC12A  |
| cg06836849 | 0.178789  | -121.4178 | -0.2068341 | 0.3856231 | SLC17A8  |
| cg21860846 | 0.2692033 | -121.376  | -0.21858   | 0.4877833 | ELK1     |
| cg09784259 | 0.3099914 | -121.3    | -0.2199438 | 0.5299352 | SELE     |
| cg17896229 | 0.492314  | -120.8481 | -0.203766  | 0.6960801 | PROKR2   |
| cg16713808 | 0.4411968 | -120.8059 | -0.2113738 | 0.6525706 | CRNN     |
| cg03599338 | 0.3775191 | -120.6911 | -0.2174613 | 0.5949804 | SUSD2    |
| cg27257987 | 0.4350423 | -120.5974 | -0.2119787 | 0.6470209 | PSG4     |
| cg04721098 | 0.378996  | -120.5503 | -0.2172459 | 0.5962419 | CACNG3   |
| cg24655310 | 0.3935857 | -120.5024 | -0.2161196 | 0.6097053 | CYP4F11  |
| cg18085435 | 0.3135966 | -120.4985 | -0.2192721 | 0.5328687 | ATP8B1   |
| cg18192417 | 0.1766402 | -120.396  | -0.2054125 | 0.3820527 | NEBL     |
| cg19642007 | 0.4634043 | -120.1337 | -0.2078333 | 0.6712376 | TNNT3    |
| cg04726200 | 0.3370087 | -120.089  | -0.2187323 | 0.555741  | SLC22A18 |
| cg17915429 | 0.4478273 | -120.0752 | -0.2099565 | 0.6577839 | PGLYRP2  |
| cg00466249 | 0.3795245 | -120.073  | -0.2168166 | 0.5963411 | MGC15523 |
| cg06363801 | 0.1733946 | -120.0699 | -0.2044042 | 0.3777988 | MOSPD1   |
| cg10464775 | 0.4636993 | -119.9311 | -0.2076368 | 0.6713361 | LAMP1    |
| cg15014034 | 0.1870425 | -119.8836 | -0.2070179 | 0.3940603 | MAOA     |
| cg14001035 | 0.4003913 | -119.8249 | -0.2149965 | 0.6153878 | ATP10A   |
| cg07842062 | 0.2867754 | -119.6322 | -0.2179001 | 0.5046755 | MEFV     |
| cg13030582 | 0.1689577 | -119.3674 | -0.2027451 | 0.3717028 | MFAP4    |
| cg00625425 | 0.1842059 | -119.1416 | -0.205759  | 0.3899649 | ANKRD38  |
| cg22584138 | 0.2582695 | -119.0432 | -0.2156928 | 0.4739623 | SLC6A4   |
| cg00191052 | 0.2353936 | -119.0345 | -0.213507  | 0.4489007 | CHST7    |

|            |           |           |            |           |                    |
|------------|-----------|-----------|------------|-----------|--------------------|
| cg00474004 | 0.3591543 | -119.0051 | -0.2170713 | 0.5762256 | IFNA14             |
| cg07297906 | 0.2352689 | -118.8603 | -0.2133276 | 0.4485966 | GPC3               |
| cg21745164 | 0.3174188 | -118.8052 | -0.2178017 | 0.5352205 | LOC63928           |
| cg05767404 | 0.2678013 | -118.7918 | -0.2161402 | 0.4839415 | C1orf150           |
| cg13614083 | 0.457292  | -118.7853 | -0.2076874 | 0.6649794 | KCNAB2             |
| cg19206010 | 0.2105585 | -118.6713 | -0.2098905 | 0.420449  | UXT                |
| cg17753124 | 0.4878209 | -118.6324 | -0.2029223 | 0.6907432 | IER2               |
| cg20790540 | 0.4485011 | -118.6133 | -0.2087482 | 0.6572493 | PTCRA              |
| cg17231524 | 0.2473641 | -118.4129 | -0.2141616 | 0.4615257 | MGC39606           |
| cg01757745 | 0.1624424 | -118.2313 | -0.2001302 | 0.3625726 | C10orf93           |
| cg24693053 | 0.255695  | -118.207  | -0.2147079 | 0.4704029 | MFSD7              |
| cg12876594 | 0.2095671 | -117.6645 | -0.2087885 | 0.4183556 | NPR2               |
| cg04881903 | 0.4403141 | -117.6578 | -0.2090614 | 0.6493754 | CAPG               |
| cg12687215 | 0.2432518 | -117.6248 | -0.2130255 | 0.4562773 | FAM50A             |
| cg00532335 | 0.1707928 | -117.485  | -0.2013389 | 0.3721317 | LGI1               |
| cg18963171 | 0.180401  | -117.48   | -0.2033888 | 0.3837898 | C21orf121          |
| cg01980222 | 0.3366316 | -117.4435 | -0.2164514 | 0.5530831 | TREM2              |
| cg02786019 | 0.36738   | -117.3146 | -0.215239  | 0.5826191 | TRPV6              |
| cg19278780 | 0.4362242 | -117.3073 | -0.2092771 | 0.6455013 | SIT1               |
| cg00962459 | 0.3886895 | -117.1411 | -0.2137523 | 0.6024418 | PROKR1             |
| cg17099569 | 0.3002848 | -117.1185 | -0.2160727 | 0.5163575 | GLI2               |
| cg15590780 | 0.2819683 | -117.0747 | -0.2153719 | 0.4973402 | USH2A              |
| cg16324018 | 0.4672239 | -116.9069 | -0.2048556 | 0.6720795 | RBED1              |
| cg03112433 | 0.2441818 | -116.8554 | -0.2123937 | 0.4565755 | PFTK1              |
| cg01656853 | 0.2297923 | -116.7687 | -0.2107142 | 0.4405065 | FUT2               |
| cg09018824 | 0.294469  | -116.7538 | -0.2155787 | 0.5100477 | DKFZP686A0<br>1247 |
| cg22436411 | 0.4001249 | -116.6778 | -0.2124637 | 0.6125886 | FCGR2B             |
| cg16742703 | 0.4199172 | -116.6057 | -0.2105422 | 0.6304594 | KLK3               |
| cg18438300 | 0.4371387 | -116.5059 | -0.2085438 | 0.6456825 | FZD9               |
| cg24262376 | 0.3247426 | -116.4895 | -0.2157514 | 0.540494  | SCNM1              |
| cg18431127 | 0.3228939 | -116.4114 | -0.2156879 | 0.5385817 | EPB42              |
| cg27378216 | 0.4446658 | -116.3879 | -0.2075265 | 0.6521923 | SETBP1             |
| cg13613682 | 0.2796692 | -116.3723 | -0.2146121 | 0.4942813 | ZIC3               |
| cg07905963 | 0.2345111 | -116.357  | -0.2108769 | 0.445388  | CYP2A13            |
| cg09272256 | 0.4036466 | -116.1605 | -0.2117366 | 0.6153831 | AKR1C4             |
| cg23181133 | 0.3092856 | -116.1036 | -0.2153336 | 0.5246192 | CEACAM3            |
| cg17267907 | 0.2626185 | -115.9668 | -0.2131735 | 0.4757919 | DEFA1              |
| cg26227465 | 0.3429482 | -115.9469 | -0.2150102 | 0.5579584 | IFNG               |
| cg06850526 | 0.3746495 | -115.8998 | -0.2136448 | 0.5882943 | MGC15523           |
| cg01361446 | 0.4134355 | -115.8042 | -0.2105463 | 0.6239817 | IL2RG              |
| cg23022999 | 0.4288354 | -115.7629 | -0.2089132 | 0.6377487 | FLJ45909           |
| cg17589341 | 0.2840144 | -115.4474 | -0.2139812 | 0.4979957 | SLC14A1            |
| cg24217877 | 0.41863   | -115.4177 | -0.2097197 | 0.6283497 | FLJ44674           |
| cg18787783 | 0.476922  | -115.1661 | -0.2020949 | 0.6790169 | MMP19              |

|            |           |           |            |           |                   |
|------------|-----------|-----------|------------|-----------|-------------------|
| cg12616487 | 0.4832084 | -115.1636 | -0.2011156 | 0.684324  | EML3              |
| cg05209917 | 0.1903726 | -115.078  | -0.2030104 | 0.393383  | CNTN6             |
| cg20392764 | 0.4430154 | -114.8254 | -0.2065156 | 0.649531  | ASCL2             |
| cg12971694 | 0.3941404 | -114.7729 | -0.2113786 | 0.6055189 | CD72              |
| cg22038738 | 0.3545648 | -114.7126 | -0.2135827 | 0.5681474 | PLAT              |
| cg24870273 | 0.4054174 | -114.5702 | -0.210282  | 0.6156994 | STK19             |
| cg05064181 | 0.24684   | -114.4726 | -0.2104155 | 0.4572555 | ABLIM1            |
| cg07456201 | 0.3168493 | -114.3746 | -0.2138615 | 0.5307108 | UMOD              |
| cg00754617 | 0.3329361 | -114.3332 | -0.2137726 | 0.5467087 | SPACA4            |
| cg12089698 | 0.3075349 | -114.1928 | -0.2135828 | 0.5211176 | SPATC1            |
| cg06488505 | 0.413513  | -114.0884 | -0.2091411 | 0.6226541 | DKFZp667M2<br>411 |
| cg22802439 | 0.3676484 | -114.0832 | -0.212473  | 0.5801215 | UPK1A             |
| cg15585987 | 0.250796  | -114.0222 | -0.210355  | 0.461151  | SNTG1             |
| cg27159719 | 0.2206025 | -113.9762 | -0.2068462 | 0.4274487 | TMEM71            |
| cg26081812 | 0.4121295 | -113.847  | -0.2090694 | 0.6211989 | IL5               |
| cg23937047 | 0.4051587 | -113.8096 | -0.2096676 | 0.6148263 | PAGE1             |
| cg22158923 | 0.3037506 | -113.4575 | -0.2128331 | 0.5165837 | FLJ39237          |
| cg19103704 | 0.287647  | -113.4575 | -0.2123043 | 0.4999513 | FCGBP             |
| cg22518733 | 0.226928  | -113.3358 | -0.2070733 | 0.4340013 | CCL3              |
| cg19906550 | 0.4063135 | -113.2619 | -0.2091183 | 0.6154318 | SLC22A18          |
| cg21880903 | 0.2077263 | -113.1209 | -0.2041112 | 0.4118375 | KLB               |
| cg21414251 | 0.19662   | -113.1209 | -0.2022416 | 0.3988616 | OR12D2            |
| cg20611872 | 0.36682   | -113.0043 | -0.2115834 | 0.5784035 | XAGE3             |
| cg02990033 | 0.2299698 | -112.9202 | -0.2070567 | 0.4370264 | GFRA4             |
| cg21621114 | 0.2755835 | -112.7272 | -0.2110127 | 0.4865962 | CRX               |
| cg25322008 | 0.3080801 | -112.6716 | -0.2122085 | 0.5202886 | OR51E2            |
| cg04201347 | 0.3184956 | -112.6616 | -0.2123231 | 0.5308187 | PRRG2             |
| cg06731599 | 0.2451831 | -112.4524 | -0.208321  | 0.4535041 | ATP6AP2           |
| cg04578090 | 0.3681703 | -112.4388 | -0.2110311 | 0.5792013 | PROCA1            |
| cg10159529 | 0.4587007 | -112.4235 | -0.2026083 | 0.661309  | IL5RA             |
| cg09637363 | 0.3914176 | -112.1768 | -0.2093973 | 0.6008149 | CCND1             |
| cg25341726 | 0.423559  | -112.15   | -0.206559  | 0.630118  | IL27              |
| cg14719352 | 0.351285  | -112.1347 | -0.2114304 | 0.5627154 | FUT1              |
| cg08390254 | 0.2731029 | -111.9043 | -0.2100839 | 0.4831868 | ATP1A2            |
| cg03160508 | 0.3035048 | -111.7152 | -0.2112271 | 0.5147318 | RHOD              |
| cg06190732 | 0.2935867 | -111.5064 | -0.2107349 | 0.5043216 | SERPINA3          |
| cg20322862 | 0.2588601 | -111.5032 | -0.2086696 | 0.4675298 | TGIF              |
| cg07042144 | 0.4110395 | -111.4052 | -0.2071592 | 0.6181987 | NALP12            |
| cg18780401 | 0.2246849 | -111.3483 | -0.2048577 | 0.4295426 | OTUD5             |
| cg21518947 | 0.2705692 | -111.3416 | -0.2093886 | 0.4799577 | CABP4             |
| cg09936839 | 0.3503204 | -111.2692 | -0.2106991 | 0.5610195 | SIRT6             |
| cg13897627 | 0.4303222 | -111.1436 | -0.2050301 | 0.6353524 | FLJ44674          |
| cg14345676 | 0.3869375 | -111.1389 | -0.2088261 | 0.5957636 | HRH2              |
| cg02150910 | 0.262748  | -111.0421 | -0.2085384 | 0.4712864 | GZMH              |

|            |           |           |            |           |          |
|------------|-----------|-----------|------------|-----------|----------|
| cg27117399 | 0.3861232 | -110.8832 | -0.2086567 | 0.5947799 | CNDP1    |
| cg15775914 | 0.4565816 | -110.6033 | -0.2014571 | 0.6580387 | CHML     |
| cg10832945 | 0.3580008 | -110.5485 | -0.2098077 | 0.5678085 | FLJ45964 |
| cg09970593 | 0.2644162 | -110.4949 | -0.2081425 | 0.4725587 | OPRD1    |
| cg12878228 | 0.3471887 | -110.4938 | -0.2100876 | 0.5572764 | PRSS1    |
| cg06882926 | 0.4067715 | -110.2931 | -0.2065978 | 0.6133693 | OR1G1    |
| cg18390025 | 0.3877318 | -110.0319 | -0.2078254 | 0.5955572 | ELOVL3   |
| cg26692016 | 0.4461018 | -110.0191 | -0.2023121 | 0.6484139 | APOBEC1  |
| cg03936963 | 0.2323141 | -109.8807 | -0.2044002 | 0.4367142 | TMEM29   |
| cg11846968 | 0.4272417 | -109.8115 | -0.2042671 | 0.6315088 | PLUNC    |
| cg11009736 | 0.2109412 | -109.6896 | -0.2012562 | 0.4121974 | MARCO    |
| cg00443307 | 0.3782898 | -109.6038 | -0.2080342 | 0.586324  | KLRG1    |
| cg25384595 | 0.2629524 | -109.5314 | -0.2071114 | 0.4700637 | LILRA1   |
| cg01182697 | 0.4247849 | -109.3134 | -0.2041028 | 0.6288877 | TMEM59   |
| cg27401095 | 0.2105136 | -109.1989 | -0.2006992 | 0.4112128 | ZNF324   |
| cg10818781 | 0.4167301 | -109.02   | -0.2046312 | 0.6213614 | PHB2     |
| cg14724265 | 0.3494235 | -108.8837 | -0.2085808 | 0.5580043 | PPEF2    |
| cg18256128 | 0.2619355 | -108.8251 | -0.2063367 | 0.4682722 | PDK3     |
| cg14696870 | 0.4230393 | -108.8085 | -0.203845  | 0.6268843 | FCER1A   |
| cg02818322 | 0.3541399 | -108.7157 | -0.2082938 | 0.5624337 | MAGEC3   |
| cg19282782 | 0.4057254 | -108.1754 | -0.2048806 | 0.6106061 | IL27RA   |
| cg01999333 | 0.3696276 | -108.0131 | -0.2070633 | 0.5766909 | CASP14   |
| cg23110514 | 0.2517954 | -107.8664 | -0.2045091 | 0.4563045 | LCE3E    |
| cg18994063 | 0.3365185 | -107.5578 | -0.207603  | 0.5441215 | TIMD4    |
| cg05823029 | 0.3516824 | -107.4324 | -0.2072014 | 0.5588838 | ATP4B    |
| cg20430101 | 0.3442026 | -107.3817 | -0.2073276 | 0.5515302 | RBM10    |
| cg03840259 | 0.3858268 | -107.0972 | -0.205377  | 0.5912039 | GRAP2    |
| cg17504145 | 0.4119817 | -106.8199 | -0.2031883 | 0.61517   | CRYBB2   |
| cg18669381 | 0.2614284 | -106.5034 | -0.2040349 | 0.4654633 | ARHGEF19 |
| cg11004890 | 0.2414766 | -106.4978 | -0.2021128 | 0.4435894 | SLC4A11  |
| cg03391568 | 0.4366085 | -106.3529 | -0.200381  | 0.6369895 | PTHR1    |
| cg13739417 | 0.2994902 | -105.7342 | -0.2054863 | 0.5049765 | IL8RB    |
| cg06384491 | 0.3142538 | -105.5762 | -0.2057064 | 0.5199602 | SPIN2    |
| cg13828758 | 0.2928718 | -105.4059 | -0.2049251 | 0.4977968 | NDN      |
| cg11096993 | 0.3143871 | -104.9393 | -0.2051059 | 0.5194929 | ACY3     |
| cg00687674 | 0.270415  | -104.6424 | -0.2029083 | 0.4733233 | TMEM84   |
| cg23936476 | 0.2590616 | -104.4824 | -0.2018541 | 0.4609157 | BEX1     |
| cg13943564 | 0.3514064 | -104.4269 | -0.2044679 | 0.5558743 | SERPINB2 |
| cg06353345 | 0.3180651 | -104.3446 | -0.2045899 | 0.522655  | OR51B4   |
| cg16463460 | 0.2783713 | -104.329  | -0.2031229 | 0.4814942 | WT1      |
| cg00689340 | 0.3644822 | -103.9496 | -0.2036179 | 0.5681001 | RTKN     |
| cg25229305 | 0.3095926 | -103.8654 | -0.2039752 | 0.5135677 | KCNK18   |
| cg10500909 | 0.4139886 | -103.8084 | -0.2004172 | 0.6144058 | CYP11B2  |
| cg19635695 | 0.3247553 | -103.8031 | -0.204129  | 0.5288842 | PDE6C    |
| cg20625138 | 0.4020716 | -103.7557 | -0.2013245 | 0.6033961 | UTS2     |

|            |           |           |            |           |           |
|------------|-----------|-----------|------------|-----------|-----------|
| cg03604278 | 0.2950823 | -103.5598 | -0.2032133 | 0.4982956 | CIDEC     |
| cg05254049 | 0.2991396 | -103.4168 | -0.2032268 | 0.5023664 | SYN1      |
| cg06494770 | 0.339486  | -103.3749 | -0.2036805 | 0.5431665 | KLHL13    |
| cg15320474 | 0.3831082 | -103.3643 | -0.2022066 | 0.5853148 | UBD       |
| cg07300408 | 0.2913184 | -103.196  | -0.2026886 | 0.494007  | RNASE11   |
| cg04019407 | 0.3609298 | -102.9551 | -0.2028156 | 0.5637454 | GIP       |
| cg04991214 | 0.3874567 | -102.8525 | -0.2014892 | 0.5889459 | PFDN2     |
| cg04995095 | 0.321623  | -102.6804 | -0.2030236 | 0.5246466 | CD300E    |
| cg04545516 | 0.2746108 | -102.6372 | -0.2011963 | 0.4758072 | SEMG1     |
| cg12753858 | 0.3694146 | -102.1707 | -0.2017805 | 0.5711951 | NUT       |
| cg25553916 | 0.3203452 | -102.0772 | -0.2024332 | 0.5227784 | FLJ22318  |
| cg18680834 | 0.3144322 | -101.9048 | -0.2021711 | 0.5166033 | ZNF536    |
| cg18960218 | 0.3793598 | -101.6437 | -0.2008338 | 0.5801935 | SLC7A7    |
| cg07265310 | 0.3464832 | -101.3166 | -0.2016335 | 0.5481167 | K5B       |
| cg05134796 | 0.2820622 | -101.0486 | -0.2000785 | 0.4821408 | HNRPDL    |
| cg09837803 | 0.3251485 | -100.8887 | -0.2013219 | 0.5264704 | IL16      |
| cg09778422 | 0.3006437 | -100.741  | -0.2006476 | 0.5012913 | MSN       |
| cg17971003 | 0.3074713 | -100.7056 | -0.2008305 | 0.5083018 | SLN       |
| cg12499211 | 0.350787  | -100.4815 | -0.2007632 | 0.5515503 | SH2D2A    |
| cg09424896 | 0.3432841 | -100.4205 | -0.200826  | 0.5441101 | CIB3      |
| cg15778232 | 0.3275256 | -99.61754 | -0.2001103 | 0.5276359 | PHB2      |
| cg04902405 | 0.6851214 | 104.9132  | 0.2031916  | 0.4819297 | ZC3H11A   |
| cg24134767 | 0.6365968 | 105.863   | 0.206039   | 0.4305578 | HTR3A     |
| cg15233681 | 0.6786079 | 106.9994  | 0.2056396  | 0.4729684 | IL1R1     |
| cg04802221 | 0.6273745 | 108.8802  | 0.2088775  | 0.418497  | LOC283849 |
| cg03642518 | 0.6045561 | 116.9631  | 0.2156438  | 0.3889123 | PNOC      |
| cg12556134 | 0.5137188 | 119.4144  | 0.2101969  | 0.3035219 | TGIF2     |
| cg12177001 | 0.7357199 | 122.6466  | 0.2149816  | 0.5207384 | IFI27     |
| cg02490034 | 0.6186633 | 123.323   | 0.2214881  | 0.3971752 | MEST      |
| cg18829411 | 0.5263433 | 123.5321  | 0.2149111  | 0.3114323 | HMGN1     |
| cg10559803 | 0.6209886 | 123.8437  | 0.2219911  | 0.3989975 | RALGPS2   |
| cg04640913 | 0.6167002 | 123.8703  | 0.2219017  | 0.3947985 | CDH22     |
| cg09191626 | 0.5599448 | 124.8351  | 0.2193908  | 0.340554  | SPON1     |
| cg21279601 | 0.4864121 | 126.471   | 0.2115493  | 0.2748629 | DRD5      |
| cg10150813 | 0.5208944 | 128.6514  | 0.218059   | 0.3028354 | KIAA0746  |
| cg16616769 | 0.7574651 | 128.8359  | 0.2174688  | 0.5399963 | MGC35048  |
| cg02506908 | 0.6525798 | 133.2761  | 0.2300909  | 0.4224889 | HPD       |
| cg12232463 | 0.662165  | 135.4024  | 0.2316071  | 0.4305579 | LONRF2    |
| cg13906813 | 0.6313448 | 135.8797  | 0.2321548  | 0.3991899 | HLA-DPA1  |
| cg04376312 | 0.5367144 | 135.8797  | 0.2253469  | 0.3113675 | MYLK      |
| cg00431549 | 0.5617676 | 136.4321  | 0.2282754  | 0.3334922 | MGP       |
| cg13828047 | 0.4396805 | 138.7834  | 0.211516   | 0.2281644 | MPI       |
| cg05253327 | 0.7760009 | 141.7108  | 0.2249575  | 0.5510435 | B3GNT1    |
| cg20748065 | 0.8302547 | 141.7108  | 0.2113233  | 0.6189314 | POR       |
| cg15958424 | 0.7081825 | 353.1397  | 0.4396717  | 0.2685107 | ACPP      |

|            |           |          |           |           |          |
|------------|-----------|----------|-----------|-----------|----------|
| cg24101578 | 0.7719321 | 353.1397 | 0.4322182 | 0.3397138 | CDH22    |
| cg10861599 | 0.666178  | 353.1397 | 0.3841713 | 0.2820067 | TNFSF4   |
| cg22740835 | 0.6921056 | 353.1397 | 0.3779101 | 0.3141955 | DDR2     |
| cg03096975 | 0.5436484 | 353.1397 | 0.3701454 | 0.1735029 | EML2     |
| cg16517394 | 0.5742987 | 353.1397 | 0.369568  | 0.2047307 | TNFSF4   |
| cg17105014 | 0.542862  | 353.1397 | 0.3645779 | 0.1782841 | GYPC     |
| cg08831348 | 0.6368999 | 353.1397 | 0.3598774 | 0.2770225 | EML2     |
| cg24739326 | 0.5351676 | 353.1397 | 0.3502785 | 0.1848891 | CHST8    |
| cg14409083 | 0.5821207 | 353.1397 | 0.3435445 | 0.2385762 | EMP1     |
| cg01346152 | 0.5881367 | 353.1397 | 0.3371598 | 0.2509769 | DHRS3    |
| cg27301343 | 0.4755825 | 353.1397 | 0.3303157 | 0.1452667 | EML2     |
| cg24122922 | 0.7523098 | 353.1397 | 0.3296262 | 0.4226836 | C20orf39 |
| cg18342279 | 0.4330666 | 353.1397 | 0.3265792 | 0.1064874 | ZAR1     |
| cg02806777 | 0.6353467 | 353.1397 | 0.3221392 | 0.3132075 | PGLYRP1  |
| cg18172186 | 0.8356723 | 353.1397 | 0.3151796 | 0.5204926 | KIAA1913 |
| cg06204948 | 0.5396023 | 353.1397 | 0.3132873 | 0.226315  | MARK2    |
| cg02000005 | 0.448947  | 353.1397 | 0.3099881 | 0.1389588 | CRIP1    |
| cg09595479 | 0.4899674 | 353.1397 | 0.3095031 | 0.1804643 | PRPH     |
| cg08624249 | 0.7860634 | 353.1397 | 0.3070333 | 0.4790302 | KIAA0889 |
| cg13959523 | 0.3949041 | 353.1397 | 0.3061634 | 0.0887407 | CHST8    |
| cg11397854 | 0.4415281 | 353.1397 | 0.30491   | 0.1366182 | IQSEC1   |
| cg13547644 | 0.4793745 | 353.1397 | 0.3046389 | 0.1747356 | ACTA1    |
| cg23418591 | 0.414988  | 353.1397 | 0.3018967 | 0.1130913 | FLJ90166 |
| cg13351161 | 0.5371094 | 353.1397 | 0.2975256 | 0.2395838 | SCARA3   |
| cg14371590 | 0.6090864 | 353.1397 | 0.2973095 | 0.3117769 | SLC26A10 |
| cg18702197 | 0.6629874 | 353.1397 | 0.2967826 | 0.3662047 | HOXD3    |
| cg20427879 | 0.4925303 | 353.1397 | 0.2911081 | 0.2014222 | EML2     |
| cg03562120 | 0.6447425 | 353.1397 | 0.290422  | 0.3543206 | WISP2    |
| cg17339202 | 0.5675157 | 353.1397 | 0.2894474 | 0.2780684 | SYNC1    |
| cg12564453 | 0.8201361 | 353.1397 | 0.2864868 | 0.5336493 | CETP     |
| cg05485060 | 0.6979289 | 353.1397 | 0.2860342 | 0.4118947 | CTNNA1   |
| cg07285276 | 0.8080006 | 353.1397 | 0.2859217 | 0.5220789 | RAPGEF1  |
| cg16363586 | 0.5966949 | 353.1397 | 0.2850854 | 0.3116095 | BST2     |
| cg01103836 | 0.9568336 | 353.1397 | 0.2818754 | 0.6749582 | MYO9B    |
| cg03852144 | 0.5468324 | 353.1397 | 0.2805806 | 0.2662518 | GLRX     |
| cg11554605 | 0.7958225 | 353.1397 | 0.2779832 | 0.5178393 | ASB4     |
| cg05342835 | 0.6499318 | 353.1397 | 0.2774869 | 0.3724449 | SYNC1    |
| cg20654468 | 0.7621069 | 353.1397 | 0.2758488 | 0.4862581 | LPXN     |
| cg17890764 | 0.6811544 | 353.1397 | 0.2752997 | 0.4058547 | ITIH4    |
| cg23283495 | 0.386691  | 353.1397 | 0.2744951 | 0.1121959 | IRF6     |
| cg06507244 | 0.720916  | 353.1397 | 0.2744354 | 0.4464805 | DHX32    |
| cg03752628 | 0.5105612 | 353.1397 | 0.2691225 | 0.2414387 | PTGFRN   |
| cg13763232 | 0.7476215 | 353.1397 | 0.2646026 | 0.4830189 | SLC6A6   |
| cg24459563 | 0.7465445 | 353.1397 | 0.2625021 | 0.4840423 | CACNG1   |
| cg12052765 | 0.3939792 | 353.1397 | 0.2621455 | 0.1318336 | CHAT     |



|            |           |          |           |            |         |
|------------|-----------|----------|-----------|------------|---------|
| cg25947945 | 0.5703273 | 353.1397 | 0.2597199 | 0.3106074  | LAD1    |
| cg13185308 | 0.6526365 | 353.1397 | 0.2596421 | 0.3929945  | ABCC8   |
| cg19224278 | 0.5722235 | 353.1397 | 0.2573549 | 0.3148687  | ALDH1A3 |
| cg27114026 | 0.7864946 | 353.1397 | 0.2556957 | 0.5307989  | ELA1    |
| cg04099420 | 0.5972992 | 353.1397 | 0.2554477 | 0.3418514  | RIPK1   |
| cg07236190 | 0.7394531 | 353.1397 | 0.2538471 | 0.4856061  | AMDHD1  |
| cg23855989 | 0.4713063 | 353.1397 | 0.2518273 | 0.2194789  | AQP5    |
| cg24315815 | 0.7748262 | 353.1397 | 0.2505897 | 0.5242364  | PLSCR4  |
| cg00240880 | 0.8343865 | 353.1397 | 0.2481524 | 0.5862341  | WISP2   |
| cg16612562 | 0.6838341 | 353.1397 | 0.2480577 | 0.4357764  | RRP22   |
| cg15127733 | 0.6851814 | 353.1397 | 0.2478255 | 0.4373559  | HSPA12B |
| cg02498063 | 0.6026551 | 353.1397 | 0.2466288 | 0.3560262  | CCDC60  |
| cg13140267 | 0.3546688 | 353.1397 | 0.244432  | 0.1102368  | ASCC3L1 |
| cg17791651 | 0.5404724 | 353.1397 | 0.2426728 | 0.2977996  | POU3F1  |
| cg18392482 | 0.7868043 | 353.1397 | 0.2414362 | 0.545368   | AMDHD1  |
| cg22980351 | 0.5754073 | 353.1397 | 0.237946  | 0.3374613  | WDR40B  |
| cg04700814 | 0.5303264 | 353.1397 | 0.2362251 | 0.2941013  | HEXIM1  |
| cg13431205 | 0.85387   | 353.1397 | 0.2338204 | 0.6200497  | RB1     |
| cg19428417 | 0.4679749 | 353.1397 | 0.2321961 | 0.2357788  | RRAD    |
| cg26509022 | 0.4331208 | 353.1397 | 0.2297455 | 0.2033753  | ALDH1A3 |
| cg08858521 | 0.4449888 | 353.1397 | 0.2258717 | 0.219117   | WFIKKN1 |
| cg04123507 | 0.8262188 | 353.1397 | 0.2251241 | 0.6010947  | KRTHB6  |
| cg17067528 | 0.3034729 | 353.1397 | 0.2217402 | 0.08173271 | IER3    |
| cg25277950 | 0.3635853 | 353.1397 | 0.2166563 | 0.146929   | EML2    |
| cg02674804 | 0.8450751 | 353.1397 | 0.2155262 | 0.6295489  | REEP6   |
| cg26764244 | 0.3664221 | 353.1397 | 0.2154571 | 0.150965   | GNG12   |
| cg22215728 | 0.4044863 | 353.1397 | 0.2147191 | 0.1897672  | FHIT    |
| cg09963123 | 0.3581379 | 353.1397 | 0.2135014 | 0.1446365  | KLF3    |
| cg12024292 | 0.3496956 | 353.1397 | 0.2071196 | 0.142576   | ASTN2   |
| cg18691434 | 0.2879029 | 353.1397 | 0.2027121 | 0.08519084 | GPC2    |
| cg24330042 | 0.2597553 | 353.1397 | 0.202468  | 0.05728735 | GSTT1   |
| cg04502814 | 0.331757  | 353.1397 | 0.2014676 | 0.1302894  | SEPP1   |

**Supplementary table 5 – Probes differentially methylated between benign tumours and normal tissue**

| TargetID   | Benign.AVG_Beta | Benign.DiffScore | Benign.Delta Beta | Normal medulla.AVG_Beta | SYMBOL   |
|------------|-----------------|------------------|-------------------|-------------------------|----------|
| cg13021192 | 0.2104471       | -346.9279        | -0.3900689        | 0.6005161               | CTSZ     |
| cg16179125 | 0.2709256       | -346.9279        | -0.3722745        | 0.6432001               | CTSZ     |
| cg14204735 | 0.1013565       | -346.9279        | -0.3647891        | 0.4661456               | CYB561   |
| cg25856811 | 0.3712465       | -346.9279        | -0.3467103        | 0.7179568               | SPRR3    |
| cg01335367 | 0.1801547       | -346.9279        | -0.3431962        | 0.5233509               | C12orf34 |
| cg27619475 | 0.2146884       | -346.9279        | -0.3417978        | 0.5564861               | SLC16A5  |
| cg26164184 | 0.4777619       | -346.9279        | -0.3371533        | 0.8149152               | FCN2     |
| cg06536578 | 0.3188367       | -346.9279        | -0.3313089        | 0.6501456               | JPH4     |

|            |           |           |            |           |                |
|------------|-----------|-----------|------------|-----------|----------------|
| cg04144768 | 0.3591121 | -346.9279 | -0.3199908 | 0.6791029 | DDC            |
| cg26927807 | 0.3784085 | -346.9279 | -0.315244  | 0.6936526 | BTBD2          |
| cg13726507 | 0.5175312 | -346.9279 | -0.310887  | 0.8284182 | CTAG2          |
| cg14992108 | 0.4161512 | -346.9279 | -0.3041069 | 0.7202581 | SNTB1          |
| cg15503752 | 0.4269353 | -346.9279 | -0.3027939 | 0.7297292 | ST6GALN<br>AC1 |
| cg18149207 | 0.4359973 | -346.9279 | -0.2973538 | 0.7333511 | RORC           |
| cg22575540 | 0.4691614 | -346.9279 | -0.286698  | 0.7558594 | TRIM54         |
| cg24024214 | 0.5488926 | -346.9279 | -0.2726568 | 0.8215494 | BTNL8          |
| cg21948655 | 0.5319272 | -346.9279 | -0.2669464 | 0.7988736 | SMCP           |
| cg14256699 | 0.611236  | -346.9279 | -0.2491527 | 0.8603887 | SOST           |
| cg25813714 | 0.5948278 | -346.9279 | -0.2487658 | 0.8435937 | CYP4F12        |
| cg17357062 | 0.5827428 | -346.9279 | -0.2430122 | 0.8257549 | FCN1           |
| cg05444024 | 0.6122809 | -346.9279 | -0.239568  | 0.8518489 | FUT6           |
| cg00644033 | 0.7133662 | -346.9279 | -0.2042003 | 0.9175664 | MUC3B          |
| cg25203980 | 0.5628686 | -336.1616 | -0.2470109 | 0.8098795 | CENTB5         |
| cg23815000 | 0.4394752 | -332.711  | -0.28772   | 0.7271953 | LCN1           |
| cg06639544 | 0.4575441 | -328.085  | -0.2809711 | 0.7385153 | OR7A5          |
| cg07824742 | 0.4900818 | -321.8413 | -0.2689893 | 0.7590712 | DBH            |
| cg14706739 | 0.3974647 | -319.3188 | -0.2951113 | 0.6925761 | EPB49          |
| cg00698688 | 0.5606926 | -317.2351 | -0.2433748 | 0.8040674 | SULT2B1        |
| cg22374142 | 0.1741104 | -314.7481 | -0.323566  | 0.4976765 | HSF4           |
| cg26672426 | 0.3171419 | -309.9415 | -0.3090831 | 0.626225  | PTGES          |
| cg08626653 | 0.426699  | -309.6932 | -0.2843006 | 0.7109996 | FLJ37538       |
| cg21277505 | 0.6038447 | -309.5274 | -0.2252859 | 0.8291306 | LOC28436<br>1  |
| cg04138756 | 0.5287803 | -306.2257 | -0.2518503 | 0.7806306 | SPRR3          |
| cg20154346 | 0.3333699 | -306.0706 | -0.3046162 | 0.6379861 | RAI2           |
| cg08573687 | 0.3877482 | -306.0109 | -0.292969  | 0.6807172 | TH             |
| cg04132607 | 0.6555799 | -304.8479 | -0.2035445 | 0.8591244 | GATA5          |
| cg01103730 | 0.4112587 | -302.9466 | -0.2861116 | 0.6973703 | IL20           |
| cg25221254 | 0.4515538 | -302.0631 | -0.2748903 | 0.7264441 | ASAH3          |
| cg21450627 | 0.5872474 | -296.1111 | -0.2284113 | 0.8156587 | PSD4           |
| cg19728223 | 0.225508  | -294.2858 | -0.3128706 | 0.5383787 | KCNQ1          |
| cg20334738 | 0.3532212 | -292.761  | -0.2956606 | 0.6488818 | MAB21L2        |
| cg21457804 | 0.4918227 | -288.3329 | -0.2586918 | 0.7505146 | CT45-2         |
| cg24407065 | 0.5727598 | -283.6278 | -0.2305059 | 0.8032658 | BLZF1          |
| cg10758292 | 0.5234414 | -280.5266 | -0.2464172 | 0.7698587 | DEFA1          |
| cg08450982 | 0.2877368 | -280.0028 | -0.3010006 | 0.5887374 | NUMBL          |
| cg10604646 | 0.2317675 | -279.139  | -0.3053807 | 0.5371482 | RGS5           |
| cg25119415 | 0.4101902 | -278.2538 | -0.2777508 | 0.687941  | MNDA           |
| cg08684473 | 0.4940006 | -276.4854 | -0.2543827 | 0.7483833 | LILRB5         |
| cg12489960 | 0.3885144 | -271.8225 | -0.280333  | 0.6688474 | SGCB           |
| cg17820828 | 0.4634666 | -269.8796 | -0.2610738 | 0.7245404 | KCNQ1          |
| cg05348870 | 0.5276853 | -269.2685 | -0.2417111 | 0.7693964 | TNFSF14        |

|            |           |           |            |           |               |
|------------|-----------|-----------|------------|-----------|---------------|
| cg06101324 | 0.1945688 | -269.0948 | -0.3008547 | 0.4954236 | SPRR1A        |
| cg03602500 | 0.4728722 | -268.082  | -0.2578252 | 0.7306974 | FLJ00060      |
| cg18129786 | 0.5897987 | -267.1189 | -0.2200684 | 0.8098671 | ZNF445        |
| cg01515887 | 0.4723566 | -263.3627 | -0.2563873 | 0.7287439 | SAA2          |
| cg06123346 | 0.3325641 | -263.3597 | -0.287431  | 0.6199951 | ATP4A         |
| cg18780284 | 0.4090126 | -263.0738 | -0.2723809 | 0.6813936 | SPRR1B        |
| cg24670715 | 0.2028472 | -261.2144 | -0.2967958 | 0.4996431 | ANGPT2        |
| cg12513481 | 0.2680113 | -256.874  | -0.2922513 | 0.5602626 | SCAP1         |
| cg27285599 | 0.5226473 | -255.1927 | -0.2389331 | 0.7615805 | FLJ13841      |
| cg02442161 | 0.5106237 | -254.9574 | -0.2425034 | 0.7531271 | PI3           |
| cg10805676 | 0.4553327 | -254.9155 | -0.2579924 | 0.7133251 | MRPL28        |
| cg10062065 | 0.3858119 | -250.8833 | -0.2725392 | 0.6583511 | APEG1         |
| cg02067021 | 0.4248185 | -250.2057 | -0.2637613 | 0.6885798 | DNAJC5B       |
| cg21372914 | 0.4586053 | -250.2057 | -0.2554229 | 0.7140282 | CLEC4M        |
| cg15652212 | 0.4314117 | -249.5957 | -0.2619637 | 0.6933754 | FLJ90586      |
| cg24992780 | 0.5810164 | -247.5042 | -0.2176549 | 0.7986712 | OR7C1         |
| cg04323365 | 0.5014944 | -247.4849 | -0.2426696 | 0.744164  | GJB1          |
| cg05766474 | 0.6125528 | -244.8388 | -0.2059293 | 0.818482  | CCL16         |
| cg12815142 | 0.4116522 | -244.5072 | -0.2644736 | 0.6761258 | SPAG7         |
| cg19954000 | 0.2142081 | -244.4774 | -0.2877782 | 0.5019863 | FGF1          |
| cg16990174 | 0.2611873 | -244.1961 | -0.2863007 | 0.547488  | RYBP          |
| cg18138484 | 0.6244271 | -243.9305 | -0.2013975 | 0.8258247 | CABP2         |
| cg00334507 | 0.3484557 | -243.0216 | -0.2758473 | 0.6243029 | MVP           |
| cg22294577 | 0.5920626 | -242.2158 | -0.2123131 | 0.8043756 | SLC26A3       |
| cg24694549 | 0.3685108 | -241.5891 | -0.2717899 | 0.6403007 | GRIP1         |
| cg06436504 | 0.4052124 | -241.1902 | -0.2644283 | 0.6696407 | DOC1          |
| cg06832950 | 0.5504597 | -240.7483 | -0.2255528 | 0.7760125 | SPG3A         |
| cg06244417 | 0.5488982 | -240.2652 | -0.2258878 | 0.774786  | FCN1          |
| cg15711744 | 0.5316629 | -239.1629 | -0.2308604 | 0.7625234 | ANP32D        |
| cg14696820 | 0.3238718 | -238.0965 | -0.2770775 | 0.6009493 | LCE1A         |
| cg26149550 | 0.5701655 | -238.0965 | -0.2183807 | 0.7885463 | KLK15         |
| cg22784047 | 0.4287483 | -237.8129 | -0.2578496 | 0.6865979 | MVP           |
| cg19917856 | 0.2290399 | -237.5689 | -0.2838159 | 0.5128558 | LOC34289<br>7 |
| cg14894144 | 0.1961975 | -237.5399 | -0.2832565 | 0.479454  | LAMA3         |
| cg10677144 | 0.461436  | -237.4671 | -0.2498117 | 0.7112477 | MYOM1         |
| cg14845091 | 0.3521797 | -237.1861 | -0.2724843 | 0.624664  | ADPRHL1       |
| cg10275770 | 0.1606631 | -235.7296 | -0.2793918 | 0.4400549 | ICAM2         |
| cg26946769 | 0.5605479 | -235.0579 | -0.2204846 | 0.7810324 | MAPK4         |
| cg10990993 | 0.323761  | -233.392  | -0.274772  | 0.5985331 | MLH1          |
| cg20373326 | 0.4240545 | -233.1244 | -0.2569451 | 0.6809996 | HSD17B2       |
| cg03221619 | 0.2741154 | -232.4173 | -0.2791763 | 0.5532917 | FCER2         |
| cg20544605 | 0.396136  | -230.3184 | -0.2615652 | 0.6577012 | SORBS2        |
| cg14333565 | 0.5782117 | -230.2386 | -0.2132549 | 0.7914666 | NRTN          |
| cg26292028 | 0.4373611 | -229.9639 | -0.2526261 | 0.6899872 | FLJ37587      |

|            |           |           |            |           |               |
|------------|-----------|-----------|------------|-----------|---------------|
| cg07792737 | 0.611065  | -226.9027 | -0.2012513 | 0.8123163 | NPIP          |
| cg13521229 | 0.2775732 | -225.9915 | -0.2755464 | 0.5531197 | JOSD2         |
| cg07997737 | 0.298678  | -225.5685 | -0.2736146 | 0.5722926 | NRTN          |
| cg19949550 | 0.5053086 | -225.0674 | -0.2335145 | 0.7388231 | ASB2          |
| cg27377450 | 0.6037906 | -224.5415 | -0.2030174 | 0.8068079 | ARHGEF1<br>8  |
| cg25477904 | 0.6060557 | -223.2005 | -0.2018387 | 0.8078945 | PSG1          |
| cg02351381 | 0.1905611 | -222.021  | -0.2736334 | 0.4641945 | C12orf34      |
| cg21686987 | 0.560672  | -220.8819 | -0.2158061 | 0.7764781 | CTRB1         |
| cg14182690 | 0.5827848 | -218.6583 | -0.2081116 | 0.7908964 | RUNX3         |
| cg17907567 | 0.3601196 | -216.887  | -0.261674  | 0.6217936 | HAMP          |
| cg05671018 | 0.4316859 | -215.1837 | -0.2476962 | 0.679382  | LYSMD2        |
| cg01530101 | 0.3684948 | -215.079  | -0.2594886 | 0.6279835 | KCNQ1DN       |
| cg15516226 | 0.595266  | -214.9299 | -0.2028729 | 0.7981389 | BTNL9         |
| cg24901474 | 0.2824853 | -214.7753 | -0.2691351 | 0.5516204 | RGS5          |
| cg04505023 | 0.4583341 | -214.552  | -0.2414088 | 0.6997429 | SPRR1A        |
| cg13656062 | 0.5296136 | -213.608  | -0.2224841 | 0.7520977 | CYP4F2        |
| cg06277657 | 0.2103478 | -213.0913 | -0.2692161 | 0.4795639 | DGKI          |
| cg15928132 | 0.3461951 | -212.3166 | -0.2613719 | 0.607567  | CCKAR         |
| cg08448751 | 0.4132011 | -207.9783 | -0.2482412 | 0.6614423 | SEMA3G        |
| cg12619162 | 0.5558746 | -207.7145 | -0.2127267 | 0.7686013 | FXFD4         |
| cg09467501 | 0.1186364 | -207.4925 | -0.2534768 | 0.3721131 | PYY           |
| cg16772207 | 0.3647335 | -205.7846 | -0.2554984 | 0.620232  | MYT1          |
| cg01894895 | 0.5709264 | -205.4082 | -0.2073769 | 0.7783033 | ANXA1         |
| cg01657380 | 0.4256069 | -204.6896 | -0.2442653 | 0.6698722 | NPFF          |
| cg27235662 | 0.5414001 | -204.4026 | -0.2157302 | 0.7571304 | CLDN16        |
| cg16175263 | 0.3013916 | -203.4989 | -0.261538  | 0.5629296 | TNFRSF10<br>C |
| cg27087809 | 0.5357909 | -201.862  | -0.2163602 | 0.7521511 | ACSBG1        |
| cg24490338 | 0.4924484 | -200.8472 | -0.2274479 | 0.7198963 | TPM3          |
| cg16122592 | 0.3921765 | -200.2936 | -0.2483783 | 0.6405548 | MAGEB6        |
| cg09027725 | 0.3794625 | -199.1981 | -0.2499065 | 0.6293691 | COX4I2        |
| cg09701102 | 0.5388152 | -198.7181 | -0.2143067 | 0.7531219 | NDUFV1        |
| cg12456510 | 0.4425902 | -196.4217 | -0.2369726 | 0.6795629 | TFF2          |
| cg22189286 | 0.4574122 | -195.873  | -0.2335406 | 0.6909527 | HSPB8         |
| cg06236276 | 0.5474498 | -195.5097 | -0.210653  | 0.7581028 | SLC22A2       |
| cg27257987 | 0.4029075 | -195.4094 | -0.2441135 | 0.6470209 | PSG4          |
| cg14287742 | 0.5367789 | -193.9374 | -0.2130175 | 0.7497964 | BLZF1         |
| cg15780361 | 0.2950824 | -193.582  | -0.2563084 | 0.5513908 | ALS2CR11      |
| cg01643624 | 0.5058244 | -192.975  | -0.2208005 | 0.726625  | C11orf16      |
| cg22190114 | 0.4913115 | -192.2138 | -0.2240699 | 0.7153814 | NALP8         |
| cg13204181 | 0.3865069 | -191.1132 | -0.2446595 | 0.6311664 | GH1           |
| cg16051685 | 0.518723  | -190.6624 | -0.2165015 | 0.7352245 | TRIM63        |
| cg19728577 | 0.5710701 | -190.4075 | -0.2018861 | 0.7729563 | GUCA2B        |
| cg07651914 | 0.3212779 | -189.5981 | -0.2519409 | 0.5732188 | CLDN15        |

|            |           |           |            |           |               |
|------------|-----------|-----------|------------|-----------|---------------|
| cg24697329 | 0.5257614 | -188.6223 | -0.2138184 | 0.7395797 | ARHGEF4       |
| cg19042947 | 0.3972694 | -188.2504 | -0.241434  | 0.6387034 | SERPINA4      |
| cg07525077 | 0.3229927 | -188.0964 | -0.2509144 | 0.5739071 | RNASE3        |
| cg06220755 | 0.3739845 | -186.5881 | -0.2441315 | 0.618116  | RAI2          |
| cg05670596 | 0.2356864 | -184.8539 | -0.2521297 | 0.4878161 | CCRL2         |
| cg23881725 | 0.182071  | -183.5698 | -0.2476128 | 0.4296838 | DLEC1         |
| cg00321478 | 0.4216847 | -183.5528 | -0.2348123 | 0.6564969 | CRB1          |
| cg11599505 | 0.5637234 | -183.3434 | -0.2013048 | 0.7650282 | C20orf102     |
| cg25214346 | 0.4195328 | -182.4745 | -0.2346332 | 0.654166  | NR1I3         |
| cg06351503 | 0.4600652 | -182.1908 | -0.2265631 | 0.6866283 | RDBP          |
| cg16986846 | 0.3474799 | -182.14   | -0.2449919 | 0.5924717 | SCGB2A1       |
| cg11719283 | 0.4252513 | -182.0244 | -0.2333455 | 0.6585968 | ZNF574        |
| cg02833725 | 0.4177649 | -181.9124 | -0.2346318 | 0.6523967 | ISG20L2       |
| cg15626350 | 0.2182042 | -181.6879 | -0.2492577 | 0.467462  | ESR1          |
| cg01484156 | 0.3015344 | -181.5028 | -0.2485903 | 0.5501247 | NCALD         |
| cg18056600 | 0.1282647 | -181.4715 | -0.2366755 | 0.3649402 | ZMYND15       |
| cg24750391 | 0.2393948 | -181.1006 | -0.2496414 | 0.4890362 | PON3          |
| cg10569414 | 0.4647737 | -180.4836 | -0.2247061 | 0.6894798 | C21orf121     |
| cg13019092 | 0.5221399 | -179.0064 | -0.2106386 | 0.7327785 | PDZK1         |
| cg19368582 | 0.413243  | -178.8186 | -0.2337894 | 0.6470323 | MMRN2         |
| cg05440289 | 0.5524345 | -178.0706 | -0.2022669 | 0.7547014 | IVL           |
| cg24735489 | 0.3873025 | -177.4804 | -0.2371832 | 0.6244857 | CDSN          |
| cg19807685 | 0.4492089 | -177.3938 | -0.2264022 | 0.6756111 | HSD17B2       |
| cg00594952 | 0.3206256 | -176.7426 | -0.2443263 | 0.564952  | RIMS3         |
| cg22341310 | 0.1865462 | -176.2602 | -0.2427874 | 0.4293335 | ZNF541        |
| cg23412777 | 0.4094735 | -176.2506 | -0.2330486 | 0.6425221 | PYGO1         |
| cg19712821 | 0.3235543 | -175.3622 | -0.2432442 | 0.5667985 | KSP37         |
| cg15210427 | 0.2689357 | -175.3558 | -0.2458967 | 0.5148324 | CST9L         |
| cg24607398 | 0.2762938 | -175.0069 | -0.2455255 | 0.5218193 | MLH1          |
| cg19233472 | 0.5110571 | -174.3844 | -0.2112976 | 0.7223547 | FOXI1         |
| cg27020690 | 0.1232504 | -174.3705 | -0.2299435 | 0.3531938 | TERC          |
| cg10127415 | 0.2812916 | -174.3701 | -0.2449579 | 0.5262495 | MAGEB6        |
| cg26063872 | 0.4112043 | -173.3734 | -0.2311999 | 0.6424041 | DEFB123       |
| cg04457051 | 0.3674446 | -173.3128 | -0.2374682 | 0.6049128 | SCOC          |
| cg19982860 | 0.3962917 | -172.7653 | -0.233184  | 0.6294757 | IFNA21        |
| cg09414535 | 0.366476  | -172.7047 | -0.2372223 | 0.6036983 | GRIP1         |
| cg01982597 | 0.4611544 | -172.411  | -0.2214526 | 0.682607  | PGBD3         |
| cg04711324 | 0.324077  | -171.8969 | -0.2410144 | 0.5650914 | RIT2          |
| cg11158374 | 0.490357  | -171.4287 | -0.2147127 | 0.7050698 | TFF2          |
| cg27090216 | 0.1291898 | -171.2134 | -0.2289005 | 0.3580904 | TNFRSF10<br>C |
| cg01663968 | 0.1182204 | -170.2253 | -0.2252972 | 0.3435176 | CTSZ          |
| cg21065959 | 0.433426  | -169.7018 | -0.2253544 | 0.6587805 | LCE1E         |
| cg16176600 | 0.5301658 | -169.5615 | -0.2043587 | 0.7345245 | FRK           |
| cg22510822 | 0.4161715 | -169.1814 | -0.2280443 | 0.6442158 | OR1E2         |

|            |            |           |            |           |              |
|------------|------------|-----------|------------|-----------|--------------|
| cg14662756 | 0.4175419  | -168.0199 | -0.227196  | 0.6447378 | NPFF         |
| cg18242139 | 0.5034879  | -167.6739 | -0.2099229 | 0.7134107 | ELAVL4       |
| cg25762706 | 0.3316163  | -167.4118 | -0.2376055 | 0.5692218 | STMN4        |
| cg04953015 | 0.5040041  | -167.4118 | -0.2096751 | 0.7136792 | CHRNA2       |
| cg00622552 | 0.1492846  | -167.1848 | -0.2301315 | 0.379416  | ODF3L1       |
| cg24851490 | 0.2639164  | -167.1055 | -0.2403304 | 0.5042468 | RNASE2       |
| cg24852661 | 0.1591931  | -166.703  | -0.2315902 | 0.3907833 | GOLPH2       |
| cg05215575 | 0.3277981  | -166.3965 | -0.2372457 | 0.5650438 | FLJ25410     |
| cg18533225 | 0.473387   | -166.3965 | -0.2158688 | 0.6892558 | KLHDC7B      |
| cg25372195 | 0.4350921  | -165.9087 | -0.2229902 | 0.6580823 | DCD          |
| cg09299388 | 0.4836774  | -165.8692 | -0.21341   | 0.6970874 | PGK2         |
| cg03782453 | 0.1549342  | -164.9917 | -0.2294487 | 0.3843829 | FLJ90575     |
| cg25957124 | 0.2891426  | -164.4351 | -0.2380763 | 0.5272189 | DNAH3        |
| cg23829949 | 0.3472882  | -164.1505 | -0.2341354 | 0.5814235 | ZNF238       |
| cg02130905 | 0.3759669  | -163.9215 | -0.2308244 | 0.6067913 | STMN4        |
| cg14238120 | 0.5053829  | -163.2239 | -0.2073168 | 0.7126997 | ELA3A        |
| cg18530716 | 0.1209686  | -162.7433 | -0.2199779 | 0.3409466 | SLC16A11     |
| cg10052840 | 0.258314   | -162.1236 | -0.2368111 | 0.4951251 | SEMA6B       |
| cg10894512 | 0.4093078  | -161.2564 | -0.2246709 | 0.6339787 | ACTA2        |
| cg12069042 | 0.4642432  | -160.6127 | -0.2147424 | 0.6789856 | PLXNB1       |
| cg13578652 | 0.4112352  | -160.4119 | -0.2238944 | 0.6351296 | UBASH3A      |
| cg07597976 | 0.3543929  | -160.0781 | -0.2309014 | 0.5852943 | CD19         |
| cg27442349 | 0.410523   | -158.0892 | -0.2226816 | 0.6332046 | NFKBIB       |
| cg08260891 | 0.09013753 | -157.3538 | -0.2059421 | 0.2960796 | PPGB         |
| cg24516901 | 0.2321847  | -157.3266 | -0.2325732 | 0.4647579 | FLJ22746     |
| cg06811800 | 0.4618821  | -157.2983 | -0.2134424 | 0.6753246 | ATP4B        |
| cg19717326 | 0.215987   | -157.138  | -0.2313664 | 0.4473534 | MYADM        |
| cg02324920 | 0.292199   | -157.0221 | -0.2329749 | 0.5251739 | NEURL        |
| cg13180098 | 0.4223118  | -156.0206 | -0.2196672 | 0.641979  | RHO          |
| cg12334759 | 0.4911545  | -155.929  | -0.2068156 | 0.6979702 | C19orf19     |
| cg12022621 | 0.3198615  | -155.7543 | -0.2308777 | 0.5507392 | LAX1         |
| cg17192247 | 0.1388017  | -155.5325 | -0.2185797 | 0.3573814 | MAPRE3       |
| cg11739626 | 0.4947431  | -155.1174 | -0.2056172 | 0.7003604 | AKT1S1       |
| cg19910382 | 0.3694064  | -155.0941 | -0.2262024 | 0.5956088 | FABP1        |
| cg09426307 | 0.4297995  | -154.6875 | -0.2176495 | 0.647449  | SEC14L3      |
| cg20011352 | 0.1370667  | -154.5691 | -0.217356  | 0.3544226 | GPR124       |
| cg24884084 | 0.2024592  | -154.4923 | -0.2280691 | 0.4305283 | SPRR1B       |
| cg03609102 | 0.3431171  | -154.1399 | -0.2281147 | 0.5712318 | MUC5B        |
| cg01015871 | 0.3941997  | -154.0733 | -0.2225421 | 0.6167418 | MT4          |
| cg15996947 | 0.3955418  | -153.6333 | -0.2221027 | 0.6176445 | L2HGDH       |
| cg23260026 | 0.2755279  | -153.6015 | -0.230798  | 0.506326  | FSTL3        |
| cg20189782 | 0.5078824  | -153.3955 | -0.2018574 | 0.7097399 | MGC2712<br>1 |
| cg16626670 | 0.4298975  | -152.4013 | -0.2163087 | 0.6462061 | CLEC4G       |
| cg25882366 | 0.1639736  | -151.5724 | -0.2204336 | 0.3844072 | HOXB2        |

|            |           |           |            |           |           |
|------------|-----------|-----------|------------|-----------|-----------|
| cg22970435 | 0.1429012 | -151.2213 | -0.2159502 | 0.3588514 | SPATS1    |
| cg18979223 | 0.4482254 | -150.8914 | -0.2123759 | 0.6606013 | CDKN2B    |
| cg07339138 | 0.3480766 | -150.4436 | -0.2252765 | 0.5733532 | CCDC13    |
| cg26583078 | 0.4495518 | -149.8749 | -0.2115523 | 0.6611041 | SORBS2    |
| cg24693053 | 0.2429943 | -149.8075 | -0.2274085 | 0.4704029 | MFSD7     |
| cg04810997 | 0.4622066 | -149.8075 | -0.2092291 | 0.6714357 | TAS2R60   |
| cg18063149 | 0.4857274 | -149.5567 | -0.2045333 | 0.6902608 | FMO3      |
| cg13694749 | 0.4789423 | -149.0542 | -0.205615  | 0.6845574 | SCN4A     |
| cg19111262 | 0.2971645 | -148.5049 | -0.2268166 | 0.5239811 | IGSF9     |
| cg02187357 | 0.4193723 | -148.4157 | -0.2155721 | 0.6349444 | TBC1D22B  |
| cg24355048 | 0.4225328 | -148.1152 | -0.2149078 | 0.6374406 | CTSG      |
| cg07408456 | 0.3869863 | -148.0136 | -0.2196763 | 0.6066627 | PGLYRP2   |
| cg00756887 | 0.480947  | -147.7886 | -0.204514  | 0.685461  | PVRL4     |
| cg22194129 | 0.3675903 | -147.6835 | -0.2216081 | 0.5891984 | CLEC4C    |
| cg10575735 | 0.3807281 | -147.4866 | -0.2200558 | 0.6007839 | SSX4      |
| cg19903229 | 0.3107573 | -146.1467 | -0.2246459 | 0.5354032 | C14orf105 |
| cg19384697 | 0.2753063 | -146.0615 | -0.2252774 | 0.5005838 | UPK3B     |
| cg24429836 | 0.2359099 | -145.815  | -0.2239521 | 0.459862  | LDHD      |
| cg13271951 | 0.3006275 | -145.6367 | -0.2246169 | 0.5252445 | FAM57B    |
| cg01305625 | 0.3043836 | -145.34   | -0.2242796 | 0.5286632 | PDLIM4    |
| cg04143809 | 0.3502563 | -145.3174 | -0.2215959 | 0.5718522 | FLJ39822  |
| cg12951282 | 0.3938294 | -144.5875 | -0.2166154 | 0.6104448 | ASGR2     |
| cg15590780 | 0.2733376 | -144.4064 | -0.2240026 | 0.4973402 | USH2A     |
| cg02218324 | 0.4402226 | -144.2418 | -0.2097588 | 0.6499814 | RSHL1     |
| cg05912121 | 0.4523341 | -144.1295 | -0.2076682 | 0.6600023 | TH        |
| cg27337148 | 0.2158573 | -143.577  | -0.2206972 | 0.4365545 | CAMK1G    |
| cg04048249 | 0.4503844 | -143.1266 | -0.207424  | 0.6578084 | APOC3     |
| cg07412254 | 0.4194626 | -142.742  | -0.2120355 | 0.631498  | FLJ14816  |
| cg02423618 | 0.374014  | -142.4934 | -0.2175025 | 0.5915165 | SPATA8    |
| cg03973663 | 0.2125828 | -142.1493 | -0.2192711 | 0.4318539 | LYN       |
| cg15531099 | 0.3148871 | -141.8257 | -0.2213671 | 0.5362542 | LCE1D     |
| cg14179628 | 0.4289075 | -141.7681 | -0.2100453 | 0.6389529 | TCEAL7    |
| cg01074640 | 0.438849  | -141.1566 | -0.2081381 | 0.6469871 | IFNA17    |
| cg10414946 | 0.4203833 | -140.6043 | -0.210576  | 0.6309593 | MS4A2     |
| cg07484827 | 0.2799526 | -140.1045 | -0.2208011 | 0.5007538 | CHRNA10   |
| cg24840099 | 0.3424799 | -139.8774 | -0.2184411 | 0.5609211 | MSX1      |
| cg15060813 | 0.2889594 | -139.7246 | -0.2204679 | 0.5094273 | LRFN3     |
| cg01993576 | 0.177017  | -139.7246 | -0.2127395 | 0.3897566 | SLC29A1   |
| cg00392257 | 0.3892615 | -139.2405 | -0.2136737 | 0.6029352 | ISG20L2   |
| cg06501790 | 0.4659923 | -138.6373 | -0.2020543 | 0.6680466 | SLC34A1   |
| cg04574507 | 0.443107  | -138.5115 | -0.2058195 | 0.6489264 | CD1B      |
| cg01550148 | 0.3297896 | -137.6938 | -0.2176415 | 0.5474311 | H2AFY     |
| cg13960126 | 0.4346271 | -137.6512 | -0.2066005 | 0.6412276 | CRB3      |
| cg02157083 | 0.4228431 | -137.0862 | -0.2079717 | 0.6308148 | APOA5     |
| cg04273431 | 0.1784998 | -136.8969 | -0.2105686 | 0.3890684 | PRR3      |

|            |           |           |            |           |               |
|------------|-----------|-----------|------------|-----------|---------------|
| cg04337944 | 0.260781  | -136.7859 | -0.2179181 | 0.4786991 | FBLN1         |
| cg09300114 | 0.2493826 | -136.6161 | -0.2173494 | 0.466732  | SLC16A5       |
| cg21755709 | 0.259454  | -136.4706 | -0.217617  | 0.477071  | C21orf124     |
| cg26884581 | 0.1860756 | -136.44   | -0.211307  | 0.3973826 | PYGM          |
| cg25400358 | 0.3473084 | -136.2634 | -0.2154966 | 0.5628049 | GPR137        |
| cg07922606 | 0.2772399 | -136.166  | -0.2177164 | 0.4949563 | HIST1H3E      |
| cg26581729 | 0.2364194 | -136.1101 | -0.2162079 | 0.4526273 | NPDC1         |
| cg27418851 | 0.4572638 | -136.0246 | -0.2019466 | 0.6592104 | MBL2          |
| cg02717866 | 0.4482081 | -135.7065 | -0.2032315 | 0.6514395 | FLJ32771      |
| cg27566805 | 0.2731198 | -135.5106 | -0.2171186 | 0.4902384 | USH2A         |
| cg03468463 | 0.4416673 | -135.5106 | -0.2041338 | 0.6458012 | SERPINB1<br>2 |
| cg10787197 | 0.3576747 | -135.3105 | -0.213998  | 0.5716727 | C6orf105      |
| cg12113132 | 0.332028  | -135.076  | -0.2155607 | 0.5475886 | CCNDBP1       |
| cg25072962 | 0.4186956 | -134.2033 | -0.2066386 | 0.6253342 | MGC3529<br>5  |
| cg05569220 | 0.3682408 | -134.0151 | -0.2121979 | 0.5804387 | FLJ44861      |
| cg04962134 | 0.3900587 | -133.9851 | -0.2099823 | 0.600041  | TRIM51        |
| cg00714377 | 0.1883396 | -133.9851 | -0.2094976 | 0.3978373 | SLA2          |
| cg10322876 | 0.416801  | -133.9176 | -0.2066801 | 0.6234811 | CYP2B6        |
| cg06818777 | 0.1538068 | -133.3707 | -0.2028821 | 0.3566888 | CHAD          |
| cg18396533 | 0.2077031 | -133.1579 | -0.21123   | 0.4189331 | DYDC1         |
| cg18988110 | 0.2462574 | -132.8333 | -0.2140851 | 0.4603425 | ATAD4         |
| cg25982743 | 0.2246599 | -132.5112 | -0.2123551 | 0.437015  | TIMP4         |
| cg08972170 | 0.3443215 | -131.7344 | -0.2123839 | 0.5567054 | Ells1         |
| cg00042156 | 0.3864616 | -131.7344 | -0.2088302 | 0.5952918 | MGC1629<br>1  |
| cg12781568 | 0.3446136 | -131.7251 | -0.2123534 | 0.556967  | WT1           |
| cg15842430 | 0.4236422 | -131.57   | -0.2042159 | 0.627858  | FAM12B        |
| cg26420196 | 0.2586522 | -131.43   | -0.2134741 | 0.4721264 | GAS6          |
| cg02812142 | 0.447898  | -131.4102 | -0.2005511 | 0.6484491 | ACMSD         |
| cg06531741 | 0.3225929 | -131.4055 | -0.2132317 | 0.5358245 | HTR3B         |
| cg01837574 | 0.3219095 | -131.397  | -0.2132474 | 0.535157  | TRAPPC1       |
| cg05093686 | 0.2634074 | -130.9833 | -0.2132335 | 0.4766409 | MAB21L1       |
| cg01785568 | 0.3387767 | -130.6305 | -0.211851  | 0.5506277 | MSX1          |
| cg01772980 | 0.4202167 | -130.2258 | -0.2037542 | 0.6239709 | SCGB1D1       |
| cg11161873 | 0.3233706 | -130.0176 | -0.2121313 | 0.535502  | FLJ39575      |
| cg24628744 | 0.1970792 | -129.7599 | -0.2069926 | 0.4040718 | H2AFY         |
| cg07967308 | 0.427519  | -128.9561 | -0.2019237 | 0.6294427 | ACP5          |
| cg26415633 | 0.2569061 | -128.1509 | -0.2107098 | 0.4676159 | KLK1          |
| cg03003745 | 0.384182  | -127.2908 | -0.2058951 | 0.590077  | UNQ473        |
| cg01726767 | 0.4163908 | -127.0831 | -0.2021313 | 0.6185221 | LALBA         |
| cg05654163 | 0.4302045 | -127.0426 | -0.2002766 | 0.6304811 | SLC39A2       |
| cg10071275 | 0.3743601 | -126.4315 | -0.2061804 | 0.5805405 | MYT1          |
| cg11070419 | 0.3395194 | -126.2065 | -0.2084939 | 0.5480133 | C4BPA         |



|            |           |           |            |           |               |
|------------|-----------|-----------|------------|-----------|---------------|
| cg24816455 | 0.2690404 | -125.6907 | -0.2090975 | 0.4781379 | SEMA3B        |
| cg21402035 | 0.3991855 | -125.4356 | -0.2030181 | 0.6022036 | GALR3         |
| cg06233503 | 0.3584393 | -123.8817 | -0.2055662 | 0.5640055 | KCNQ1         |
| cg09971646 | 0.2062421 | -123.7286 | -0.2028933 | 0.4091354 | DLK1          |
| cg13125510 | 0.2642738 | -122.2718 | -0.2061288 | 0.4704025 | C11orf44      |
| cg09837803 | 0.3211045 | -121.1479 | -0.2053659 | 0.5264704 | IL16          |
| cg21432842 | 0.3335341 | -120.9564 | -0.2047532 | 0.5382873 | CSF3          |
| cg00518911 | 0.3086182 | -120.8084 | -0.2053485 | 0.5139667 | HOXA10        |
| cg00750606 | 0.3352596 | -120.4056 | -0.2042258 | 0.5394855 | CDA           |
| cg07643942 | 0.3592739 | -120.37   | -0.2028512 | 0.5621251 | LACRT         |
| cg15095327 | 0.3635907 | -120.1664 | -0.2023984 | 0.5659891 | IL17RE        |
| cg03343942 | 0.3341567 | -118.3441 | -0.2026484 | 0.5368052 | SLC39A5       |
| cg02595219 | 0.2608487 | -118.1288 | -0.2024336 | 0.4632823 | KCNE3         |
| cg05636175 | 0.2299802 | -117.8688 | -0.2001695 | 0.4301497 | TNFRSF10<br>C |
| cg07950803 | 0.3042721 | -117.8434 | -0.2029534 | 0.5072255 | CD1A          |
| cg00626119 | 0.3352027 | -117.0787 | -0.2015838 | 0.5367865 | NTRK1         |
| cg22083047 | 0.2834398 | -114.9885 | -0.2004482 | 0.483888  | PRICKLE2      |
| cg04802221 | 0.6193671 | 116.2671  | 0.2008701  | 0.418497  | LOC28384<br>9 |
| cg11554605 | 0.7239587 | 124.5568  | 0.2061195  | 0.5178393 | ASB4          |
| cg13587552 | 0.748615  | 124.7839  | 0.203934   | 0.544681  | SCNN1D        |
| cg07047653 | 0.7612386 | 125.6195  | 0.2030588  | 0.5581798 | AQP2          |
| cg16077929 | 0.7129662 | 127.0657  | 0.2090607  | 0.5039055 | CDKL1         |
| cg24427660 | 0.7163236 | 128.0183  | 0.2097554  | 0.5065683 | PNPLA2        |
| cg13763232 | 0.6952932 | 130.1387  | 0.2122743  | 0.4830189 | SLC6A6        |
| cg03562120 | 0.5632215 | 132.4722  | 0.2089009  | 0.3543206 | WISP2         |
| cg27114026 | 0.7441927 | 134.5603  | 0.2133939  | 0.5307989 | ELA1          |
| cg21685427 | 0.7584045 | 134.5603  | 0.2113987  | 0.5470058 | SGK2          |
| cg16363586 | 0.6576596 | 348.5116  | 0.3460501  | 0.3116095 | BST2          |
| cg01346152 | 0.5650785 | 348.5116  | 0.3141015  | 0.2509769 | DHRS3         |
| cg09871315 | 0.6141825 | 348.5116  | 0.3088086  | 0.305374  | HOXA2         |
| cg14409083 | 0.5375026 | 348.5116  | 0.2989264  | 0.2385762 | EMP1          |
| cg26509022 | 0.5002564 | 348.5116  | 0.2968811  | 0.2033753 | ALDH1A3       |
| cg03852144 | 0.553052  | 348.5116  | 0.2868002  | 0.2662518 | GLRX          |
| cg01126560 | 0.6840987 | 348.5116  | 0.2862973  | 0.3978014 | C9orf142      |
| cg24101578 | 0.6223112 | 348.5116  | 0.2825973  | 0.3397138 | CDH22         |
| cg22628873 | 0.7328217 | 348.5116  | 0.2799931  | 0.4528286 | GGT6          |
| cg19224278 | 0.5911987 | 348.5116  | 0.27633    | 0.3148687 | ALDH1A3       |
| cg03605761 | 0.6316794 | 348.5116  | 0.2745783  | 0.357101  | RNF126        |
| cg25101936 | 0.7741333 | 348.5116  | 0.273555   | 0.5005782 | ZBTB16        |
| cg18702197 | 0.6365814 | 348.5116  | 0.2703767  | 0.3662047 | HOXD3         |
| cg08624249 | 0.7458744 | 348.5116  | 0.2668442  | 0.4790302 | KIAA0889      |
| cg06507244 | 0.7107822 | 348.5116  | 0.2643017  | 0.4464805 | DHX32         |
| cg02506908 | 0.6844155 | 348.5116  | 0.2619266  | 0.4224889 | HPD           |

|            |           |          |           |           |          |
|------------|-----------|----------|-----------|-----------|----------|
| cg16517394 | 0.4589661 | 348.5116 | 0.2542354 | 0.2047307 | TNFSF4   |
| cg01103836 | 0.928439  | 348.5116 | 0.2534807 | 0.6749582 | MYO9B    |
| cg04106785 | 0.7395539 | 348.5116 | 0.2534598 | 0.4860941 | CDK5R1   |
| cg06204948 | 0.4790973 | 348.5116 | 0.2527823 | 0.226315  | MARK2    |
| cg03271907 | 0.8411444 | 348.5116 | 0.2524876 | 0.5886568 | MGMT     |
| cg15958424 | 0.5202593 | 348.5116 | 0.2517485 | 0.2685107 | ACPP     |
| cg07251788 | 0.7383964 | 348.5116 | 0.2510532 | 0.4873433 | CLTCL1   |
| cg18172186 | 0.7677502 | 348.5116 | 0.2472576 | 0.5204926 | KIAA1913 |
| cg14371590 | 0.5589874 | 348.5116 | 0.2472104 | 0.3117769 | SLC26A10 |
| cg07285276 | 0.7679853 | 348.5116 | 0.2459064 | 0.5220789 | RAPGEF1  |
| cg02490034 | 0.6414741 | 348.5116 | 0.2442989 | 0.3971752 | MEST     |
| cg12177001 | 0.7625607 | 348.5116 | 0.2418223 | 0.5207384 | IFI27    |
| cg18392482 | 0.7868274 | 348.5116 | 0.2414594 | 0.545368  | AMDHD1   |
| cg24012708 | 0.6627925 | 348.5116 | 0.2405701 | 0.4222224 | HDHD3    |
| cg26668713 | 0.387832  | 348.5116 | 0.2402968 | 0.1475352 | SIPA1    |
| cg13906813 | 0.6392214 | 348.5116 | 0.2400314 | 0.3991899 | HLA-DPA1 |
| cg17790333 | 0.730447  | 348.5116 | 0.2378185 | 0.4926285 | CYP11A1  |
| cg10861599 | 0.5196396 | 348.5116 | 0.2376329 | 0.2820067 | TNFSF4   |
| cg17686260 | 0.7338976 | 348.5116 | 0.2349083 | 0.4989893 | MGMT     |
| cg07236190 | 0.7202386 | 348.5116 | 0.2346325 | 0.4856061 | AMDHD1   |
| cg17890764 | 0.6377015 | 348.5116 | 0.2318467 | 0.4058547 | ITIH4    |
| cg13547644 | 0.4053276 | 348.5116 | 0.230592  | 0.1747356 | ACTA1    |
| cg15926585 | 0.7453433 | 348.5116 | 0.2304858 | 0.5148575 | COMT     |
| cg02674804 | 0.8598175 | 348.5116 | 0.2302686 | 0.6295489 | REEP6    |
| cg24459563 | 0.7111396 | 348.5116 | 0.2270972 | 0.4840423 | CACNG1   |
| cg12564453 | 0.7585761 | 348.5116 | 0.2249268 | 0.5336493 | CETP     |
| cg22759185 | 0.7784568 | 348.5116 | 0.2192051 | 0.5592517 | REEP6    |
| cg26394940 | 0.3375127 | 348.5116 | 0.2191917 | 0.118321  | FLJ10945 |
|            |           |          |           |           | MGC3504  |
| cg16616769 | 0.7583253 | 348.5116 | 0.2183291 | 0.5399963 | 8        |
| cg14444710 | 0.8050643 | 348.5116 | 0.2175655 | 0.5874987 | PDPK1    |
| cg12866859 | 0.5797057 | 348.5116 | 0.2173734 | 0.3623323 | HEXIM1   |
| cg13351161 | 0.4509546 | 348.5116 | 0.2113708 | 0.2395838 | SCARA3   |
| cg17105014 | 0.3892421 | 348.5116 | 0.210958  | 0.1782841 | GYPC     |
| cg22601917 | 0.464293  | 348.5116 | 0.2099738 | 0.2543193 | H6PD     |
| cg07284558 | 0.3458493 | 348.5116 | 0.2093686 | 0.1364807 | STK32C   |
| cg17296078 | 0.326533  | 348.5116 | 0.2079994 | 0.1185335 | UBTD1    |
| cg11397854 | 0.344146  | 348.5116 | 0.2075279 | 0.1366182 | IQSEC1   |

**Supplementary table 6 – Gene Ontology enrichment analysis of genes differentially methylated between Cluster A and normal tissue**

| GO biological process complete                           | Homo sapiens - REFLIST (20972) | upload_1 (1133) | upload_1 (expected) | upload_1 (over/under) | upload_1 (fold Enrichment) | upload_1 (P-value) |
|----------------------------------------------------------|--------------------------------|-----------------|---------------------|-----------------------|----------------------------|--------------------|
| epoxygenase P450 pathway (GO:0019373)                    | 18                             | 9               | 0.97                | +                     | 9.26                       | 7.13E-03           |
| peptide cross-linking (GO:0018149)                       | 56                             | 26              | 3.03                | +                     | 8.59                       | 2.79E-12           |
| keratinization (GO:0031424)                              | 50                             | 23              | 2.7                 | +                     | 8.51                       | 1.69E-10           |
| drug metabolic process (GO:0017144)                      | 40                             | 13              | 2.16                | +                     | 6.02                       | 3.80E-03           |
| defense response to fungus (GO:0050832)                  | 37                             | 12              | 2                   | +                     | 6                          | 1.06E-02           |
| acute-phase response (GO:0006953)                        | 45                             | 14              | 2.43                | +                     | 5.76                       | 2.33E-03           |
| monocyte chemotaxis (GO:0002548)                         | 40                             | 12              | 2.16                | +                     | 5.55                       | 2.34E-02           |
| keratinocyte differentiation (GO:0030216)                | 101                            | 30              | 5.46                | +                     | 5.5                        | 1.57E-09           |
| acute inflammatory response (GO:0002526)                 | 76                             | 22              | 4.11                | +                     | 5.36                       | 3.96E-06           |
| defense response to Gram-positive bacterium (GO:0050830) | 66                             | 18              | 3.57                | +                     | 5.05                       | 3.52E-04           |
| xenobiotic metabolic process (GO:0006805)                | 97                             | 23              | 5.24                | +                     | 4.39                       | 6.54E-05           |
| cellular response to xenobiotic stimulus (GO:0071466)    | 101                            | 23              | 5.46                | +                     | 4.22                       | 1.35E-04           |
| epidermal cell differentiation (GO:0009913)              | 145                            | 32              | 7.83                | +                     | 4.08                       | 5.04E-07           |
| chemokine-mediated signaling pathway (GO:0070098)        | 73                             | 16              | 3.94                | +                     | 4.06                       | 3.15E-02           |
| response to xenobiotic stimulus (GO:0009410)             | 110                            | 23              | 5.94                | +                     | 3.87                       | 6.13E-04           |
| defense response to bacterium (GO:0042742)               | 229                            | 45              | 12.37               | +                     | 3.64                       | 3.55E-09           |
| epidermis development (GO:0008544)                       | 257                            | 42              | 13.88               | +                     | 3.03                       | 5.44E-06           |
| skin development (GO:0043588)                            | 212                            | 34              | 11.45               | +                     | 2.97                       | 3.49E-04           |

|                                                            |      |     |       |   |      |          |
|------------------------------------------------------------|------|-----|-------|---|------|----------|
| negative regulation of peptidase activity (GO:0010466)     | 250  | 40  | 13.51 | + | 2.96 | 2.47E-05 |
| negative regulation of endopeptidase activity (GO:0010951) | 239  | 37  | 12.91 | + | 2.87 | 2.18E-04 |
| humoral immune response (GO:0006959)                       | 170  | 26  | 9.18  | + | 2.83 | 3.02E-02 |
| positive regulation of ERK1 and ERK2 cascade (GO:0070374)  | 177  | 27  | 9.56  | + | 2.82 | 2.08E-02 |
| defense response to other organism (GO:0098542)            | 491  | 68  | 26.53 | + | 2.56 | 4.75E-08 |
| leukocyte migration (GO:0050900)                           | 265  | 36  | 14.32 | + | 2.51 | 7.10E-03 |
| negative regulation of proteolysis (GO:0045861)            | 316  | 42  | 17.07 | + | 2.46 | 1.59E-03 |
| defense response (GO:0006952)                              | 1236 | 164 | 66.77 | + | 2.46 | 7.52E-22 |
| response to bacterium (GO:0009617)                         | 521  | 68  | 28.15 | + | 2.42 | 5.83E-07 |
| extracellular matrix organization (GO:0030198)             | 309  | 40  | 16.69 | + | 2.4  | 5.88E-03 |
| extracellular structure organization (GO:0043062)          | 310  | 40  | 16.75 | + | 2.39 | 6.36E-03 |
| regulation of inflammatory response (GO:0050727)           | 301  | 38  | 16.26 | + | 2.34 | 1.96E-02 |
| regulation of lipid metabolic process (GO:0019216)         | 287  | 36  | 15.51 | + | 2.32 | 4.11E-02 |
| immune response (GO:0006955)                               | 1105 | 138 | 59.7  | + | 2.31 | 1.59E-15 |
| innate immune response (GO:0045087)                        | 618  | 76  | 33.39 | + | 2.28 | 6.47E-07 |
| inflammatory response (GO:0006954)                         | 470  | 56  | 25.39 | + | 2.21 | 5.79E-04 |
| negative regulation of hydrolase activity (GO:0051346)     | 405  | 48  | 21.88 | + | 2.19 | 5.70E-03 |
| regulation of peptidase activity (GO:0052547)              | 399  | 47  | 21.56 | + | 2.18 | 8.75E-03 |
| response to other organism (GO:0051707)                    | 844  | 94  | 45.6  | + | 2.06 | 6.59E-07 |
| response to external biotic stimulus (GO:0043207)          | 844  | 94  | 45.6  | + | 2.06 | 6.59E-07 |
| response to biotic stimulus (GO:0009607)                   | 876  | 95  | 47.33 | + | 2.01 | 2.04E-06 |
| regulation of response to external stimulus (GO:0032101)   | 797  | 81  | 43.06 | + | 1.88 | 6.82E-04 |
| regulation of immune response                              | 862  | 87  | 46.57 | + | 1.87 | 3.00E-   |

|                                                           |      |     |        |   |      |          |
|-----------------------------------------------------------|------|-----|--------|---|------|----------|
| (GO:0050776)                                              |      |     |        |   |      | 04       |
| immune system process<br>(GO:0002376)                     | 2013 | 198 | 108.75 | + | 1.82 | 1.58E-12 |
| response to external stimulus<br>(GO:0009605)             | 1835 | 177 | 99.13  | + | 1.79 | 4.86E-10 |
| cellular homeostasis<br>(GO:0019725)                      | 719  | 69  | 38.84  | + | 1.78 | 4.28E-02 |
| chemical homeostasis<br>(GO:0048878)                      | 907  | 87  | 49     | + | 1.78 | 2.55E-03 |
| regulation of immune system<br>process (GO:0002682)       | 1397 | 134 | 75.47  | + | 1.78 | 1.23E-06 |
| ion transmembrane transport<br>(GO:0034220)               | 787  | 74  | 42.52  | + | 1.74 | 3.93E-02 |
| negative regulation of catalytic<br>activity (GO:0043086) | 843  | 79  | 45.54  | + | 1.73 | 2.12E-02 |
| response to nitrogen compound<br>(GO:1901698)             | 881  | 82  | 47.6   | + | 1.72 | 1.76E-02 |
| response to organic cyclic<br>compound (GO:0014070)       | 902  | 83  | 48.73  | + | 1.7  | 2.33E-02 |
| negative regulation of molecular<br>function (GO:0044092) | 1094 | 98  | 59.1   | + | 1.66 | 9.13E-03 |
| homeostatic process<br>(GO:0042592)                       | 1374 | 121 | 74.23  | + | 1.63 | 1.11E-03 |
| transmembrane transport<br>(GO:0055085)                   | 1131 | 99  | 61.1   | + | 1.62 | 2.13E-02 |
| cellular response to chemical<br>stimulus (GO:0070887)    | 2310 | 200 | 124.8  | + | 1.6  | 1.64E-07 |
| response to oxygen-containing<br>compound (GO:1901700)    | 1418 | 122 | 76.61  | + | 1.59 | 3.22E-03 |
| cell surface receptor signaling<br>pathway (GO:0007166)   | 2158 | 184 | 116.58 | + | 1.58 | 4.16E-06 |
| tissue development<br>(GO:0009888)                        | 1513 | 126 | 81.74  | + | 1.54 | 1.06E-02 |
| response to organic substance<br>(GO:0010033)             | 2584 | 209 | 139.6  | + | 1.5  | 1.74E-05 |
| response to stress (GO:0006950)                           | 3301 | 266 | 178.33 | + | 1.49 | 6.86E-08 |
| cellular response to organic<br>substance (GO:0071310)    | 1887 | 150 | 101.94 | + | 1.47 | 1.29E-02 |
| regulation of biological quality<br>(GO:0065008)          | 3460 | 273 | 186.92 | + | 1.46 | 3.08E-07 |
| system process (GO:0003008)                               | 1804 | 142 | 97.46  | + | 1.46 | 4.19E-02 |
| animal organ development<br>(GO:0048513)                  | 2811 | 220 | 151.86 | + | 1.45 | 8.90E-05 |
| response to chemical                                      | 3866 | 299 | 208.86 | + | 1.43 | 2.23E-   |

|                                                        |       |     |        |   |      |          |
|--------------------------------------------------------|-------|-----|--------|---|------|----------|
| (GO:0042221)                                           |       |     |        |   |      | 07       |
| regulation of response to stimulus (GO:0048583)        | 3640  | 281 | 196.65 | + | 1.43 | 1.42E-06 |
| response to stimulus (GO:0050896)                      | 7565  | 580 | 408.69 | + | 1.42 | 1.78E-21 |
| regulation of localization (GO:0032879)                | 2447  | 187 | 132.2  | + | 1.41 | 7.09E-03 |
| multi-organism process (GO:0051704)                    | 2251  | 170 | 121.61 | + | 1.4  | 4.83E-02 |
| regulation of catalytic activity (GO:0050790)          | 2352  | 177 | 127.07 | + | 1.39 | 3.69E-02 |
| single-multicellular organism process (GO:0044707)     | 5301  | 398 | 286.38 | + | 1.39 | 9.24E-10 |
| system development (GO:0048731)                        | 3938  | 291 | 212.75 | + | 1.37 | 5.33E-05 |
| multicellular organismal process (GO:0032501)          | 6356  | 466 | 343.38 | + | 1.36 | 6.30E-11 |
| signal transduction (GO:0007165)                       | 4765  | 349 | 257.43 | + | 1.36 | 1.85E-06 |
| regulation of molecular function (GO:0065009)          | 2843  | 207 | 153.59 | + | 1.35 | 4.25E-02 |
| cell differentiation (GO:0030154)                      | 3210  | 233 | 173.42 | + | 1.34 | 1.13E-02 |
| single organism signaling (GO:0044700)                 | 5107  | 368 | 275.9  | + | 1.33 | 3.30E-06 |
| signaling (GO:0023052)                                 | 5110  | 368 | 276.06 | + | 1.33 | 3.55E-06 |
| cell communication (GO:0007154)                        | 5197  | 371 | 280.76 | + | 1.32 | 8.48E-06 |
| multicellular organism development (GO:0007275)        | 4532  | 323 | 244.84 | + | 1.32 | 2.35E-04 |
| cellular response to stimulus (GO:0051716)             | 6129  | 436 | 331.12 | + | 1.32 | 1.22E-07 |
| anatomical structure development (GO:0048856)          | 4966  | 350 | 268.29 | + | 1.3  | 1.46E-04 |
| developmental process (GO:0032502)                     | 5297  | 366 | 286.17 | + | 1.28 | 5.12E-04 |
| negative regulation of biological process (GO:0048519) | 4490  | 310 | 242.57 | + | 1.28 | 1.01E-02 |
| single-organism developmental process (GO:0044767)     | 5210  | 355 | 281.47 | + | 1.26 | 3.93E-03 |
| single-organism cellular process (GO:0044763)          | 10980 | 734 | 593.19 | + | 1.24 | 1.50E-13 |
| single-organism process (GO:0044699)                   | 12314 | 820 | 665.26 | + | 1.23 | 6.34E-18 |
| regulation of biological process                       | 10826 | 695 | 584.87 | + | 1.19 | 2.32E-   |

|                                                                                    |       |      |        |   |      |          |
|------------------------------------------------------------------------------------|-------|------|--------|---|------|----------|
| (GO:0050789)                                                                       |       |      |        |   |      | 07       |
| biological regulation<br>(GO:0065007)                                              | 11443 | 734  | 618.2  | + | 1.19 | 1.52E-08 |
| regulation of cellular process<br>(GO:0050794)                                     | 10301 | 634  | 556.51 | + | 1.14 | 1.91E-02 |
| biological_process (GO:0008150)                                                    | 16903 | 1022 | 913.17 | + | 1.12 | 5.44E-15 |
| macromolecule metabolic<br>process (GO:0043170)                                    | 7412  | 326  | 400.43 | - | 0.81 | 1.26E-02 |
| regulation of cellular biosynthetic<br>process (GO:0031326)                        | 4246  | 169  | 229.39 | - | 0.74 | 1.85E-02 |
| cellular macromolecule metabolic<br>process (GO:0044260)                           | 6729  | 265  | 363.53 | - | 0.73 | 5.81E-07 |
| regulation of transcription, DNA-<br>templated (GO:0006355)                        | 3565  | 138  | 192.6  | - | 0.72 | 3.45E-02 |
| regulation of RNA biosynthetic<br>process (GO:2001141)                             | 3606  | 139  | 194.81 | - | 0.71 | 2.36E-02 |
| regulation of nucleic acid-<br>templated transcription<br>(GO:1903506)             | 3589  | 138  | 193.89 | - | 0.71 | 2.17E-02 |
| regulation of nucleobase-<br>containing compound metabolic<br>process (GO:0019219) | 4054  | 155  | 219.01 | - | 0.71 | 2.67E-03 |
| nitrogen compound metabolic<br>process (GO:0006807)                                | 5609  | 214  | 303.02 | - | 0.71 | 3.07E-06 |
| regulation of macromolecule<br>biosynthetic process<br>(GO:0010556)                | 4065  | 155  | 219.61 | - | 0.71 | 2.14E-03 |
| regulation of RNA metabolic<br>process (GO:0051252)                                | 3717  | 139  | 200.81 | - | 0.69 | 2.54E-03 |
| organic cyclic compound<br>metabolic process (GO:1901360)                          | 4882  | 181  | 263.75 | - | 0.69 | 6.92E-06 |
| regulation of nitrogen compound<br>metabolic process (GO:0051171)                  | 4349  | 161  | 234.95 | - | 0.69 | 7.80E-05 |
| regulation of cellular<br>macromolecule biosynthetic<br>process (GO:2000112)       | 3949  | 144  | 213.34 | - | 0.67 | 1.74E-04 |
| organic substance biosynthetic<br>process (GO:1901576)                             | 4681  | 168  | 252.89 | - | 0.66 | 1.21E-06 |
| biosynthetic process<br>(GO:0009058)                                               | 4768  | 171  | 257.59 | - | 0.66 | 7.02E-07 |
| organelle organization<br>(GO:0006996)                                             | 3210  | 112  | 173.42 | - | 0.65 | 4.59E-04 |
| heterocycle metabolic process<br>(GO:0046483)                                      | 4646  | 161  | 251    | - | 0.64 | 7.03E-08 |
| cellular biosynthetic process                                                      | 4579  | 158  | 247.38 | - | 0.64 | 7.36E-   |

|                                                                  |      |     |        |   |      |          |
|------------------------------------------------------------------|------|-----|--------|---|------|----------|
| (GO:0044249)                                                     |      |     |        |   |      | 08       |
| cellular aromatic compound metabolic process (GO:0006725)        | 4695 | 161 | 253.64 | - | 0.63 | 2.01E-08 |
| cellular nitrogen compound metabolic process (GO:0034641)        | 5131 | 175 | 277.2  | - | 0.63 | 6.37E-10 |
| transcription, DNA-templated (GO:0006351)                        | 2560 | 87  | 138.3  | - | 0.63 | 4.10E-03 |
| nucleic acid-templated transcription (GO:0097659)                | 2561 | 87  | 138.36 | - | 0.63 | 4.00E-03 |
| organic cyclic compound biosynthetic process (GO:1901362)        | 3198 | 107 | 172.77 | - | 0.62 | 4.28E-05 |
| RNA biosynthetic process (GO:0032774)                            | 2684 | 89  | 145    | - | 0.61 | 6.18E-04 |
| aromatic compound biosynthetic process (GO:0019438)              | 3090 | 101 | 166.94 | - | 0.61 | 2.16E-05 |
| cellular macromolecule biosynthetic process (GO:0034645)         | 3633 | 118 | 196.27 | - | 0.6  | 3.51E-07 |
| macromolecule biosynthetic process (GO:0009059)                  | 3714 | 120 | 200.65 | - | 0.6  | 1.35E-07 |
| heterocycle biosynthetic process (GO:0018130)                    | 3078 | 99  | 166.29 | - | 0.6  | 9.12E-06 |
| nucleobase-containing compound biosynthetic process (GO:0034654) | 3020 | 97  | 163.15 | - | 0.59 | 1.26E-05 |
| nucleobase-containing compound metabolic process (GO:0006139)    | 4509 | 141 | 243.6  | - | 0.58 | 1.69E-11 |
| cellular nitrogen compound biosynthetic process (GO:0044271)     | 3508 | 109 | 189.52 | - | 0.58 | 4.00E-08 |
| gene expression (GO:0010467)                                     | 3770 | 112 | 203.67 | - | 0.55 | 1.51E-10 |
| RNA metabolic process (GO:0016070)                               | 3446 | 102 | 186.17 | - | 0.55 | 2.23E-09 |
| nucleic acid metabolic process (GO:0090304)                      | 3961 | 112 | 213.99 | - | 0.52 | 4.06E-13 |
| Unclassified (UNCLASSIFIED)                                      | 4069 | 111 | 219.83 | - | 0.5  | 0.00E+00 |
| chromosome organization (GO:0051276)                             | 992  | 21  | 53.59  | - | 0.39 | 1.71E-03 |
| DNA metabolic process (GO:0006259)                               | 777  | 15  | 41.98  | - | 0.36 | 8.86E-03 |
| cellular macromolecular complex assembly (GO:0034622)            | 727  | 14  | 39.28  | - | 0.36 | 1.93E-02 |



|                                                                     |     |    |       |   |       |          |
|---------------------------------------------------------------------|-----|----|-------|---|-------|----------|
| modification-dependent macromolecule catabolic process (GO:0043632) | 495 | 7  | 26.74 | - | 0.26  | 4.29E-02 |
| mRNA metabolic process (GO:0016071)                                 | 621 | 8  | 33.55 | - | 0.24  | 8.42E-04 |
| RNA processing (GO:0006396)                                         | 860 | 10 | 46.46 | - | 0.22  | 4.81E-07 |
| mRNA processing (GO:0006397)                                        | 439 | 5  | 23.72 | - | 0.21  | 2.73E-02 |
| ncRNA processing (GO:0034470)                                       | 404 | 4  | 21.83 | - | < 0.2 | 2.68E-02 |
| ncRNA metabolic process (GO:0034660)                                | 554 | 5  | 29.93 | - | < 0.2 | 1.47E-04 |
| RNA splicing (GO:0008380)                                           | 374 | 3  | 20.21 | - | < 0.2 | 1.92E-02 |
| ribonucleoprotein complex biogenesis (GO:0022613)                   | 459 | 3  | 24.8  | - | < 0.2 | 3.22E-04 |

**Supplementary table 7 – probes differentially methylated between benign tumours in cluster A and normal tissue**

| TargetID   | A_benign.A VG_Beta | A_benign.Diffs core | A_benign.Delta Beta | normal.AVG_Beta | SYMBOL   |
|------------|--------------------|---------------------|---------------------|-----------------|----------|
| cg16363586 | 0.7318995          | 350.9073            | 0.42029             | 0.3116095       | BST2     |
| cg01346152 | 0.6477849          | 350.9073            | 0.396808            | 0.2509769       | DHRS3    |
| cg14409083 | 0.6325329          | 350.9073            | 0.3939567           | 0.2385762       | EMP1     |
| cg09871315 | 0.6886036          | 350.9073            | 0.3832297           | 0.305374        | HOXA2    |
| cg03852144 | 0.646186           | 350.9073            | 0.3799342           | 0.2662518       | GLRX     |
| cg24101578 | 0.7117751          | 350.9073            | 0.3720612           | 0.3397138       | CDH22    |
| cg01126560 | 0.7422166          | 350.9073            | 0.3444153           | 0.3978014       | C9orf142 |
| cg04106785 | 0.8219019          | 350.9073            | 0.3358079           | 0.4860941       | CDK5R1   |
| cg18702197 | 0.6998484          | 350.9073            | 0.3336436           | 0.3662047       | HOXD3    |
| cg02506908 | 0.7539712          | 350.9073            | 0.3314823           | 0.4224889       | HPD      |
| cg25101936 | 0.8154942          | 350.9073            | 0.314916            | 0.5005782       | ZBTB16   |
| cg17890764 | 0.7153561          | 350.9073            | 0.3095013           | 0.4058547       | ITIH4    |
| cg22628873 | 0.7565897          | 350.9073            | 0.3037612           | 0.4528286       | GGT6     |
| cg26509022 | 0.505851           | 350.9073            | 0.3024757           | 0.2033753       | ALDH1A3  |
| cg15958424 | 0.5678796          | 350.9073            | 0.2993689           | 0.2685107       | ACPP     |
| cg03605761 | 0.6559187          | 350.9073            | 0.2988177           | 0.357101        | RNF126   |
| cg17105014 | 0.4721282          | 350.9073            | 0.2938441           | 0.1782841       | GYPC     |
| cg19224278 | 0.6052728          | 350.9073            | 0.2904042           | 0.3148687       | ALDH1A3  |
| cg01103836 | 0.9608721          | 350.9073            | 0.2859139           | 0.6749582       | MYO9B    |
| cg08624249 | 0.7633548          | 350.9073            | 0.2843247           | 0.4790302       | KIAA0889 |
| cg16517394 | 0.4855182          | 350.9073            | 0.2807874           | 0.2047307       | TNFSF4   |
| cg07251788 | 0.7675034          | 350.9073            | 0.2801602           | 0.4873433       | CLTCL1   |
| cg06204948 | 0.5060629          | 350.9073            | 0.2797478           | 0.226315        | MARK2    |

|            |           |          |           |           |              |
|------------|-----------|----------|-----------|-----------|--------------|
| cg13763232 | 0.7614101 | 350.9073 | 0.2783912 | 0.4830189 | SLC6A6       |
| cg10861599 | 0.5578045 | 350.9073 | 0.2757978 | 0.2820067 | TNFSF4       |
| cg18172186 | 0.7959149 | 350.9073 | 0.2754223 | 0.5204926 | KIAA1913     |
| cg15926585 | 0.7899944 | 350.9073 | 0.2751369 | 0.5148575 | COMT         |
| cg24012708 | 0.6962115 | 350.9073 | 0.2739891 | 0.4222224 | HDHD3        |
| cg12564453 | 0.807474  | 350.9073 | 0.2738247 | 0.5336493 | CETP         |
| cg16616769 | 0.8137823 | 350.9073 | 0.2737861 | 0.5399963 | MGC3504<br>8 |
| cg03271907 | 0.8582872 | 350.9073 | 0.2696304 | 0.5886568 | MGMT         |
| cg26668713 | 0.4164093 | 350.9073 | 0.2688741 | 0.1475352 | SIPA1        |
| cg17791651 | 0.5639657 | 350.9073 | 0.2661661 | 0.2977996 | POU3F1       |
| cg14371590 | 0.5779256 | 350.9073 | 0.2661486 | 0.3117769 | SLC26A10     |
| cg12866859 | 0.6282226 | 350.9073 | 0.2658903 | 0.3623323 | HEXIM1       |
| cg24427660 | 0.7715482 | 350.9073 | 0.2649799 | 0.5065683 | PNPLA2       |
| cg13547644 | 0.437705  | 350.9073 | 0.2629693 | 0.1747356 | ACTA1        |
| cg24459563 | 0.7468368 | 350.9073 | 0.2627944 | 0.4840423 | CACNG1       |
| cg02674804 | 0.8918444 | 350.9073 | 0.2622955 | 0.6295489 | REEP6        |
| cg18392482 | 0.8071101 | 350.9073 | 0.2617421 | 0.545368  | AMDHD1       |
| cg04700814 | 0.5555636 | 350.9073 | 0.2614623 | 0.2941013 | HEXIM1       |
| cg02490034 | 0.6575207 | 350.9073 | 0.2603455 | 0.3971752 | MEST         |
| cg06507244 | 0.7057386 | 350.9073 | 0.2592581 | 0.4464805 | DHX32        |
| cg12177001 | 0.7788891 | 350.9073 | 0.2581507 | 0.5207384 | IFI27        |
| cg07285276 | 0.7785299 | 350.9073 | 0.256451  | 0.5220789 | RAPGEF1      |
| cg05342835 | 0.6273702 | 350.9073 | 0.2549253 | 0.3724449 | SYNC1        |
| cg00431549 | 0.5858328 | 350.9073 | 0.2523405 | 0.3334922 | MGP          |
| cg06627364 | 0.433069  | 350.9073 | 0.2499924 | 0.1830765 | MGC4677      |
| cg11397854 | 0.3865781 | 350.9073 | 0.2499599 | 0.1366182 | IQSEC1       |
| cg17790333 | 0.7421055 | 350.9073 | 0.2494771 | 0.4926285 | CYP11A1      |
| cg17686260 | 0.748266  | 350.9073 | 0.2492768 | 0.4989893 | MGMT         |
| cg07236190 | 0.7344995 | 350.9073 | 0.2488934 | 0.4856061 | AMDHD1       |
| cg22601917 | 0.502579  | 350.9073 | 0.2482598 | 0.2543193 | H6PD         |
| cg23910243 | 0.7139539 | 350.9073 | 0.2475247 | 0.4664292 | TGFB111      |
| cg26394940 | 0.3649756 | 350.9073 | 0.2466546 | 0.118321  | FLJ10945     |
| cg23547429 | 0.4816236 | 350.9073 | 0.2447044 | 0.2369192 | SLC43A3      |
| cg13351161 | 0.4806728 | 350.9073 | 0.241089  | 0.2395838 | SCARA3       |
| cg09835085 | 0.5777772 | 350.9073 | 0.241033  | 0.3367442 | KCNE4        |
| cg15940569 | 0.5055822 | 350.9073 | 0.2405791 | 0.2650031 | GABRB3       |
| cg22759185 | 0.7991371 | 350.9073 | 0.2398854 | 0.5592517 | REEP6        |
| cg11554605 | 0.7575803 | 350.9073 | 0.2397411 | 0.5178393 | ASB4         |
| cg04640913 | 0.6344089 | 350.9073 | 0.2396104 | 0.3947985 | CDH22        |
| cg17518962 | 0.4631739 | 350.9073 | 0.2382795 | 0.2248944 | GAL3ST4      |
| cg13906813 | 0.6370082 | 350.9073 | 0.2378183 | 0.3991899 | HLA-DPA1     |
| cg14444710 | 0.8219597 | 350.9073 | 0.234461  | 0.5874987 | PDPK1        |
| cg07047653 | 0.7924626 | 350.9073 | 0.2342829 | 0.5581798 | AQP2         |
| cg26511075 | 0.8276694 | 350.9073 | 0.2342501 | 0.5934194 | FLJ25422     |

|            |            |           |            |           |               |
|------------|------------|-----------|------------|-----------|---------------|
| cg24134767 | 0.6634437  | 350.9073  | 0.2328859  | 0.4305578 | HTR3A         |
| cg06456031 | 0.438114   | 350.9073  | 0.2316598  | 0.2064543 | FLJ11000      |
| cg07284558 | 0.3648087  | 350.9073  | 0.228328   | 0.1364807 | STK32C        |
| cg16077929 | 0.7314463  | 350.9073  | 0.2275407  | 0.5039055 | CDKL1         |
| cg21685427 | 0.7724158  | 350.9073  | 0.2254099  | 0.5470058 | SGK2          |
| cg13587552 | 0.7644741  | 142.947   | 0.2197931  | 0.544681  | SCNN1D        |
| cg03562120 | 0.5733943  | 140.0818  | 0.2190737  | 0.3543206 | WISP2         |
| cg05485060 | 0.6308289  | 134.2784  | 0.2189342  | 0.4118947 | CTNNA1        |
| cg15236866 | 0.4824858  | 350.9073  | 0.2184439  | 0.2640419 | DLX1          |
| cg12232463 | 0.648662   | 132.5832  | 0.2181041  | 0.4305579 | LONRF2        |
| cg17339202 | 0.4940087  | 350.9073  | 0.2159404  | 0.2780684 | SYNC1         |
| cg27114026 | 0.7448972  | 133.339   | 0.2140984  | 0.5307989 | ELA1          |
| cg17296078 | 0.3314849  | 350.9073  | 0.2129513  | 0.1185335 | UBTD1         |
| cg14611112 | 0.6013207  | 127.7779  | 0.2126407  | 0.38868   | LCN6          |
| cg03096975 | 0.3847917  | 350.9073  | 0.2112888  | 0.1735029 | EML2          |
| cg22467567 | 0.4894396  | 142.947   | 0.2110077  | 0.2784319 | IGFBP5        |
| cg10055471 | 0.9262407  | 350.9073  | 0.2098029  | 0.7164378 | NROB2         |
| cg24315815 | 0.7340075  | 126.9884  | 0.2097711  | 0.5242364 | PLSCR4        |
| cg03359508 | 0.3371783  | 350.9073  | 0.2077055  | 0.1294728 | ANXA11        |
| cg02085507 | 0.4674757  | 142.947   | 0.2069165  | 0.2605592 | TRIP10        |
| cg21747271 | 0.6526744  | 117.8083  | 0.2060854  | 0.446589  | AIP           |
| cg05253327 | 0.7564764  | 125.313   | 0.205433   | 0.5510435 | B3GNT1        |
| cg08493463 | 0.653909   | 116.786   | 0.205217   | 0.448692  | ENPP6         |
| cg04802221 | 0.6224962  | 115.7478  | 0.2039992  | 0.418497  | LOC28384<br>9 |
| cg26069745 | 0.515412   | 125.7503  | 0.2025176  | 0.3128945 | HOXA2         |
| cg17998964 | 0.3660597  | 350.9073  | 0.2022685  | 0.1637913 | MARK2         |
| cg04498511 | 0.8033556  | 130.8741  | 0.2018071  | 0.6015485 | ZC3H11A       |
| cg09595479 | 0.3812983  | 350.9073  | 0.2008341  | 0.1804643 | PRPH          |
| cg04902405 | 0.6821129  | 111.9026  | 0.2001831  | 0.4819297 | ZC3H11A       |
| cg07572435 | 0.7740341  | 122.4825  | 0.200073   | 0.5739611 | LY6D          |
| cg18356799 | 0.3248164  | -110.8892 | -0.2000218 | 0.5248383 | DSC1          |
| cg20423977 | 0.5221806  | -145.6849 | -0.2000577 | 0.7222383 | PLAC4         |
| cg09995854 | 0.471266   | -129.1504 | -0.2000875 | 0.6713535 | IL1F8         |
| cg15779716 | 0.3466449  | -111.6417 | -0.2000905 | 0.5467355 | CDCP1         |
| cg15822411 | 0.4983643  | -137.3375 | -0.2002677 | 0.6986321 | MGC3473<br>2  |
| cg06415153 | 0.3515844  | -112.2031 | -0.2003536 | 0.5519381 | PITPNM2       |
| cg14620221 | 0.5455269  | -156.9226 | -0.2004165 | 0.7459434 | OR8B8         |
| cg06495803 | 0.3175568  | -111.2913 | -0.2004517 | 0.5180085 | TNFRSF7       |
| cg04991214 | 0.3884616  | -115.2014 | -0.2004843 | 0.5889459 | PFDN2         |
| cg05040360 | 0.4023282  | -116.9318 | -0.2005837 | 0.6029119 | MS4A6E        |
| cg04720330 | 0.09568101 | -148.5375 | -0.2007309 | 0.296412  | PHLDA2        |
| cg08191915 | 0.225937   | -116.4886 | -0.2008085 | 0.4267455 | PANX3         |
| cg01346718 | 0.1975097  | -120.5512 | -0.2008562 | 0.3983659 | CSNK1E        |

|            |            |           |            |           |           |
|------------|------------|-----------|------------|-----------|-----------|
| cg22825487 | 0.4943737  | -137.0931 | -0.2008941 | 0.6952678 | VNN3      |
| cg14321743 | 0.4461523  | -124.7908 | -0.2010542 | 0.6472065 | PLA2G2D   |
| cg26757722 | 0.2648683  | -113.3994 | -0.201103  | 0.4659714 | CACNG2    |
| cg08711674 | 0.3003897  | -112.459  | -0.2014217 | 0.5018114 | AKT1S1    |
| cg13726463 | 0.5365358  | -154.7618 | -0.2015324 | 0.7380682 | COX6A2    |
| cg03014957 | 0.3651012  | -114.4624 | -0.2015337 | 0.5666349 | DEFB118   |
| cg23216015 | 0.1789561  | -124.6484 | -0.201557  | 0.3805131 | C7orf16   |
| cg23824713 | 0.5273647  | -151.0276 | -0.2017291 | 0.7290938 | SERPINB5  |
| cg19258973 | 0.4130538  | -120.0178 | -0.2017855 | 0.6148393 | KRTHB3    |
| cg10938286 | 0.6430569  | -242.4591 | -0.2018281 | 0.844885  | CST2      |
| cg12445208 | 0.3525514  | -114.0172 | -0.2018304 | 0.5543818 | ZNF583    |
| cg26822241 | 0.4959837  | -139.4404 | -0.2019576 | 0.6979414 | CYP2C9    |
| cg22937804 | 0.33636    | -113.501  | -0.2020168 | 0.5383769 | MGC44505  |
| cg20543571 | 0.6388376  | -237.8687 | -0.20207   | 0.8409076 | C15orf43  |
| cg11505080 | 0.2037609  | -120.9703 | -0.2021421 | 0.405903  | GPR173    |
| cg19096475 | 0.4194538  | -121.7182 | -0.202318  | 0.6217718 | ASAM      |
| cg04713352 | 0.3738753  | -116.1589 | -0.2023452 | 0.5762205 | ATP4A     |
| cg01359534 | 0.5517934  | -164.2864 | -0.2023519 | 0.7541453 | AQP10     |
| cg26391080 | 0.521719   | -149.8381 | -0.2023836 | 0.7241026 | SH2D4B    |
| cg19478478 | 0.4811571  | -135.5152 | -0.20239   | 0.6835471 | TRDN      |
| cg08390254 | 0.2807952  | -114.0433 | -0.2023915 | 0.4831868 | ATP1A2    |
| cg09715672 | 0.2641212  | -114.9502 | -0.2024781 | 0.4665993 | C10orf116 |
| cg12040555 | 0.6900006  | -328.7926 | -0.2025043 | 0.8925049 | MGMT      |
| cg18221897 | 0.4917175  | -139.0512 | -0.2025582 | 0.6942758 | KIR2DL1   |
| cg20305726 | 0.3383783  | -114.5754 | -0.2028581 | 0.5412364 | DEFB126   |
| cg14898892 | 0.3370276  | -114.539  | -0.2028671 | 0.5398947 | SHRM      |
| cg15916061 | 0.3467495  | -115.0813 | -0.202976  | 0.5497255 | SLC17A4   |
| cg15585987 | 0.2580275  | -116.0694 | -0.2031235 | 0.4611151 | SNTG1     |
| cg12188416 | 0.29672    | -114.456  | -0.2031363 | 0.4998563 | TP73L     |
| cg06747888 | 0.1935352  | -123.7731 | -0.2032001 | 0.3967353 | TBR1      |
| cg03440846 | 0.2137814  | -120.7376 | -0.2032454 | 0.4170268 | ACSS2     |
| cg12616487 | 0.4810311  | -136.9558 | -0.2032928 | 0.684324  | EML3      |
| cg10431340 | 0.3294729  | -114.8056 | -0.2033034 | 0.5327762 | MPZ       |
| cg16739580 | 0.4294218  | -124.9851 | -0.2034464 | 0.6328683 | POP2      |
| cg15746187 | 0.4477564  | -128.6656 | -0.2034594 | 0.6512157 | FBXO44    |
| cg00476577 | 0.1134818  | -144.8521 | -0.2035769 | 0.3170587 | ZNF217    |
| cg00364814 | 0.4532914  | -130.1745 | -0.2036331 | 0.6569245 | R3HDM2    |
| cg24147596 | 0.4499107  | -129.5975 | -0.2037636 | 0.6536743 | ARL14     |
| cg06946880 | 0.5106438  | -148.0482 | -0.2038462 | 0.7144901 | ATP6V1B1  |
| cg20832020 | 0.5041015  | -145.5876 | -0.2038678 | 0.7079693 | VSIG9     |
| cg11241627 | 0.09744513 | -151.476  | -0.2039041 | 0.3013493 | FERD3L    |
| cg20769842 | 0.3380242  | -115.8398 | -0.203931  | 0.5419552 | MKRN3     |
| cg00499822 | 0.2705599  | -116.3307 | -0.2040223 | 0.4745822 | CXCL12    |
| cg12332316 | 0.6366496  | -241.9673 | -0.2040702 | 0.8407198 | F12       |

|            |            |           |            |           |               |
|------------|------------|-----------|------------|-----------|---------------|
| cg00463848 | 0.5184652  | -151.657  | -0.2040753 | 0.7225405 | KRT2A         |
| cg20904010 | 0.4917455  | -142.0883 | -0.2043427 | 0.6960882 | SYN3          |
| cg17977362 | 0.553925   | -169.8673 | -0.204374  | 0.7582989 | FLJ45964      |
| cg25598083 | 0.3860212  | -120.0657 | -0.2044413 | 0.5904626 | ACOT2         |
| cg17040807 | 0.1724303  | -129.2211 | -0.2044705 | 0.3769008 | CYGB          |
| cg14672680 | 0.6798923  | -316.4981 | -0.2045506 | 0.8844429 | TNNI2         |
| cg01274324 | 0.6376901  | -245.2935 | -0.2046285 | 0.8423186 | C21orf77      |
| cg10726357 | 0.3663226  | -118.4381 | -0.2046499 | 0.5709725 | TSCOT         |
| cg14401454 | 0.6324998  | -238.908  | -0.2047051 | 0.8372048 | C14orf8       |
| cg01598642 | 0.5166456  | -152.2852 | -0.204833  | 0.7214786 | HBG1          |
| cg07072643 | 0.3556211  | -117.9402 | -0.204879  | 0.5605    | EMR3          |
| cg15446391 | 0.204311   | -124.0334 | -0.2049993 | 0.4093103 | WT1           |
| cg27420123 | 0.5090091  | -149.5896 | -0.2050354 | 0.7140445 | FSHB          |
| cg10746737 | 0.500123   | -146.2639 | -0.2050599 | 0.7051829 | HLA-DRB5      |
| cg15329483 | 0.391953   | -121.6641 | -0.2051368 | 0.5970898 | SSX7          |
| cg02311163 | 0.4108716  | -124.243  | -0.2051378 | 0.6160095 | SEMG2         |
| cg05248781 | 0.6361415  | -245.062  | -0.2051397 | 0.8412812 | LCE5A         |
| cg21624282 | 0.5929345  | -199.6467 | -0.2053021 | 0.7982366 | LOC12225<br>8 |
| cg16219122 | 0.2767739  | -117.5249 | -0.2053211 | 0.482095  | ABCB1         |
| cg15792367 | 0.3163358  | -116.9807 | -0.2053535 | 0.5216893 | KLK11         |
| cg20790540 | 0.4518295  | -132.5551 | -0.2054199 | 0.6572493 | PTCRA         |
| cg07914866 | 0.1321058  | -140.7331 | -0.2054397 | 0.3375455 | IRAK3         |
| cg13650156 | 0.4936715  | -144.9825 | -0.2056342 | 0.6993057 | PILRA         |
| cg16899306 | 0.4160388  | -125.8406 | -0.205696  | 0.6217347 | HLA-DQB2      |
| cg09382492 | 0.509633   | -151.2859 | -0.2058172 | 0.7154502 | AANAT         |
| cg02633817 | 0.4794129  | -140.9685 | -0.2060135 | 0.6854264 | FXVD3         |
| cg21023001 | 0.2995441  | -117.8035 | -0.2060603 | 0.5056044 | C1QR1         |
| cg04623837 | 0.09533664 | -154.8626 | -0.2060896 | 0.3014262 | HCG9          |
| cg03309967 | 0.4102314  | -125.4964 | -0.2061101 | 0.6163416 | PSENN         |
| cg27655855 | 0.4972784  | -147.1358 | -0.2061316 | 0.70341   | CST9L         |
| cg15140807 | 0.5355108  | -163.6267 | -0.2061357 | 0.7416465 | FLJ31222      |
| cg04761824 | 0.4898244  | -144.6527 | -0.2062021 | 0.6960264 | 30-nov        |
| cg01109219 | 0.3261268  | -118.2361 | -0.2062386 | 0.5323654 | RASGRP3       |
| cg21624359 | 0.2717448  | -118.8507 | -0.2062716 | 0.4780163 | FFAR3         |
| cg11656547 | 0.1070737  | -150.3813 | -0.2062816 | 0.3133553 | MAMDC2        |
| cg22607339 | 0.5079649  | -151.6838 | -0.2063939 | 0.7143588 | MPL           |
| cg26159905 | 0.3700302  | -121.0263 | -0.2064155 | 0.5764457 | ASB10         |
| cg26134665 | 0.3789326  | -122.006  | -0.2065235 | 0.5854561 | STX1B2        |
| cg25993152 | 0.4970154  | -147.7721 | -0.2065388 | 0.7035542 | XAGE5         |
| cg26185508 | 0.4734458  | -140.1851 | -0.2066198 | 0.6800656 | CDCP2         |
| cg19875656 | 0.5851111  | -196.8409 | -0.2066734 | 0.7917845 | TSP50         |
| cg25545210 | 0.4802414  | -142.5378 | -0.2067898 | 0.6870312 | KRTHA4        |
| cg01407244 | 0.1975558  | -127.1324 | -0.2068196 | 0.4043754 | TNFRSF10<br>C |

|            |            |           |            |           |           |
|------------|------------|-----------|------------|-----------|-----------|
| cg14127336 | 0.6631874  | -294.0492 | -0.2068793 | 0.8700668 | TCL1A     |
| cg26222045 | 0.3843838  | -123.1545 | -0.2069333 | 0.5913171 | UNQ5810   |
| cg05113558 | 0.5780452  | -192.0948 | -0.2069672 | 0.7850124 | FOXH1     |
| cg07173760 | 0.3042673  | -119.1234 | -0.2071994 | 0.5114667 | CLC       |
| cg10710439 | 0.2374931  | -122.3807 | -0.2072037 | 0.4446968 | FLJ37549  |
| cg15447486 | 0.4947377  | -148.3136 | -0.2073037 | 0.7020414 | GPR109B   |
| cg24862483 | 0.09240032 | -157.6244 | -0.2073298 | 0.2997301 | CD300LG   |
| cg13482233 | 0.501277   | -150.8364 | -0.2073522 | 0.7086292 | HEPH      |
| cg02097420 | 0.4479751  | -134.7449 | -0.2074346 | 0.6554097 | HRG       |
| cg03329572 | 0.4831486  | -144.632  | -0.207476  | 0.6906246 | FCRL5     |
| cg13745346 | 0.4689928  | -140.3103 | -0.207491  | 0.6764838 | CBFA2T3   |
| cg07220939 | 0.4171354  | -128.7402 | -0.2076177 | 0.6247531 | SLC22A12  |
| cg03112433 | 0.248916   | -121.8903 | -0.2076595 | 0.4565755 | PFTK1     |
| cg09626634 | 0.3314871  | -120.2309 | -0.2077249 | 0.539212  | EBI2      |
| cg14102807 | 0.488095   | -146.9102 | -0.2078373 | 0.6959323 | CD19      |
| cg13678049 | 0.2077195  | -126.71   | -0.2078492 | 0.4155688 | PARC      |
| cg10146929 | 0.1558321  | -137.0231 | -0.2079849 | 0.363817  | HIST1H1A  |
| cg19242268 | 0.3337625  | -120.6527 | -0.2079935 | 0.541756  | TCEA2     |
| cg11693019 | 0.6146575  | -229.8722 | -0.2083415 | 0.8229991 | AKR1B10   |
| cg07892051 | 0.4341426  | -133.148  | -0.2084143 | 0.6425568 | AKAP3     |
| cg02537838 | 0.5894345  | -205.1722 | -0.2084194 | 0.7978539 | C20orf151 |
| cg25677709 | 0.5330164  | -167.0906 | -0.2084207 | 0.7414371 | NDST1     |
| cg16792160 | 0.3504857  | -122.0893 | -0.2084598 | 0.5589455 | ASAH2     |
| cg01193293 | 0.3100429  | -120.7511 | -0.2085415 | 0.5185844 | SIGLEC7   |
| cg04719766 | 0.575326   | -194.1925 | -0.208603  | 0.7839289 | KCNQ1     |
| cg07823492 | 0.6416223  | -265.6131 | -0.2086276 | 0.8502499 | HOXB1     |
| cg13530946 | 0.3879893  | -125.8789 | -0.2086614 | 0.5966507 | IARS2     |
| cg20017147 | 0.301639   | -120.8961 | -0.2086729 | 0.5103118 | TEX101    |
| cg26745032 | 0.2455992  | -123.3356 | -0.2086813 | 0.4542806 | REPS2     |
| cg08804892 | 0.1440583  | -141.0269 | -0.2087607 | 0.352819  | TRAK1     |
| cg12937434 | 0.129964   | -145.2287 | -0.2087658 | 0.3387298 | BZRAP1    |
| cg13030582 | 0.1629079  | -136.2462 | -0.2087949 | 0.3717028 | MFAP4     |
| cg01762581 | 0.2188832  | -126.4398 | -0.2089413 | 0.4278245 | DKK4      |
| cg23324787 | 0.4082621  | -129.1687 | -0.2089539 | 0.617216  | RAG2      |
| cg17568996 | 0.272131   | -122.0031 | -0.2090184 | 0.4811494 | NFAM1     |
| cg02124291 | 0.5001586  | -153.5775 | -0.2091061 | 0.7092648 | OR7A5     |
| cg02765820 | 0.3675907  | -124.3548 | -0.2091753 | 0.576766  | C3orf22   |
| cg14178895 | 0.2440757  | -124.0881 | -0.2092274 | 0.4533031 | C6orf105  |
| cg11811840 | 0.4132608  | -130.3706 | -0.2092334 | 0.6224942 | UGT1A1    |
| cg03387723 | 0.5541958  | -181.1377 | -0.2092772 | 0.763473  | SCMH1     |
| cg12547930 | 0.4058277  | -129.2424 | -0.2092842 | 0.6151119 | WFDC6     |
| cg17894008 | 0.6096826  | -227.5632 | -0.2093384 | 0.819021  | NACAL     |
| cg13447818 | 0.5605526  | -185.6161 | -0.2094048 | 0.7699574 | FLG       |
| cg27214365 | 0.5477276  | -177.4491 | -0.2094128 | 0.7571404 | GYPB      |
| cg13407883 | 0.3807579  | -126.0526 | -0.2094293 | 0.5901871 | SIGLEC9   |

|            |            |           |            |           |          |
|------------|------------|-----------|------------|-----------|----------|
| cg07979357 | 0.08325797 | -164.3348 | -0.2094295 | 0.2926875 | IL27RA   |
| cg17803430 | 0.4566161  | -140.2096 | -0.2095297 | 0.6661457 | C4BPA    |
| cg26692016 | 0.438835   | -135.9398 | -0.2095789 | 0.6484139 | APOBEC1  |
| cg01072821 | 0.4187466  | -131.9116 | -0.20962   | 0.6283666 | UNQ9391  |
| cg11432797 | 0.4847695  | -149.0682 | -0.2097206 | 0.6944901 | SPN      |
| cg26777475 | 0.3881051  | -127.3537 | -0.2097415 | 0.5978466 | PCOLCE   |
| cg05254747 | 0.5297803  | -168.7045 | -0.2099832 | 0.7397634 | SLC39A14 |
| cg00501366 | 0.3789408  | -126.6685 | -0.2100468 | 0.5889876 | ALOX12B  |
| cg00344709 | 0.5653868  | -190.5183 | -0.2100521 | 0.7754389 | ANKRD21  |
| cg19138060 | 0.4083929  | -130.7233 | -0.2100553 | 0.6184482 | WDR13    |
| cg11328541 | 0.2041956  | -129.9154 | -0.2101937 | 0.4143894 | OR7C1    |
| cg16879596 | 0.5096647  | -159.7903 | -0.2102965 | 0.7199612 | CYP3A5   |
| cg08952029 | 0.2611113  | -124.085  | -0.2103017 | 0.471413  | CHRD12   |
| cg17819635 | 0.1774774  | -135.0537 | -0.2105428 | 0.3880202 | TCTEX1D1 |
| cg14154330 | 0.2854715  | -123.3613 | -0.2105668 | 0.4960383 | ARHGAP27 |
| cg19587887 | 0.4841644  | -150.4559 | -0.2106158 | 0.6947802 | PSKH2    |
| cg01560871 | 0.6458548  | -280.4762 | -0.21073   | 0.8565848 | C10orf27 |
| cg14462830 | 0.3983284  | -130.1693 | -0.2107552 | 0.6090836 | TRDN     |
| cg12330929 | 0.5253197  | -168.1408 | -0.2108059 | 0.7361256 | USP9X    |
| cg11787522 | 0.32626    | -124.2319 | -0.2111261 | 0.5373861 | STRA6    |
| cg20277416 | 0.3780341  | -128.0512 | -0.2111554 | 0.5891895 | TM7SF2   |
| cg07426848 | 0.5012192  | -157.8612 | -0.2111564 | 0.7123755 | S100A3   |
| cg12089698 | 0.3099373  | -123.9365 | -0.2111803 | 0.5211176 | SPATC1   |
| cg22088368 | 0.3225059  | -124.2046 | -0.2111963 | 0.5337022 | MGC35206 |
| cg20189937 | 0.2822147  | -124.2158 | -0.2112122 | 0.4934269 | L2HGDH   |
| cg05190718 | 0.485115   | -151.9169 | -0.211262  | 0.696377  | CASQ2    |
| cg01135626 | 0.3735547  | -127.8925 | -0.2114015 | 0.5849562 | CDX4     |
| cg18807515 | 0.410477   | -133.1059 | -0.211446  | 0.621923  | PRAMEF2  |
| cg11237817 | 0.3932219  | -130.5159 | -0.2115461 | 0.6047679 | KIR3DL3  |
| cg19067730 | 0.08446328 | -166.3454 | -0.2115828 | 0.296046  | PPGB     |
| cg21312148 | 0.3189183  | -124.5857 | -0.2115845 | 0.5305029 | LCE2D    |
| cg09133026 | 0.5182403  | -166.3128 | -0.2116103 | 0.7298506 | RPS6KL1  |
| cg27383362 | 0.443532   | -140.2423 | -0.2116448 | 0.6551768 | ATAD3C   |
| cg24192663 | 0.5162734  | -165.5499 | -0.2117022 | 0.7279755 | HSPA6    |
| cg24642468 | 0.3065259  | -124.6755 | -0.2118193 | 0.5183452 | MGC33367 |
| cg06494770 | 0.3311934  | -125.4916 | -0.2119732 | 0.5431665 | KLHL13   |
| cg06074920 | 0.5657875  | -196.2327 | -0.2122312 | 0.7780187 | KRTHA4   |
| cg24489015 | 0.3824205  | -130.2576 | -0.2123851 | 0.5948056 | LPO      |
| cg23282949 | 0.443238   | -141.4095 | -0.2124276 | 0.6556656 | RENBP    |
| cg07339327 | 0.6914697  | -350.9073 | -0.2124642 | 0.9039338 | CCND1    |
| cg18750960 | 0.2840813  | -125.7067 | -0.2125005 | 0.4965817 | HOXD4    |
| cg15417244 | 0.5026455  | -161.1121 | -0.2125363 | 0.7151818 | PDZRN4   |

|            |           |           |            |           |          |
|------------|-----------|-----------|------------|-----------|----------|
| cg14449575 | 0.2491046 | -127.5278 | -0.212547  | 0.4616516 | HAPLN4   |
| cg19554294 | 0.4003752 | -133.2658 | -0.2127222 | 0.6130974 | VN1R2    |
| cg11630242 | 0.1384494 | -147.2588 | -0.2127428 | 0.3511922 | AKAP10   |
| cg22456522 | 0.2251301 | -130.242  | -0.2129022 | 0.4380323 | LILRB3   |
| cg03993463 | 0.6299766 | -265.1775 | -0.2129799 | 0.8429564 | KCNJ15   |
| cg25645462 | 0.6392916 | -279.1084 | -0.2129903 | 0.8522819 | GPR56    |
| cg20781967 | 0.2233339 | -130.6301 | -0.2130677 | 0.4364015 | NINJ2    |
| cg06142324 | 0.4210437 | -137.4712 | -0.2130823 | 0.634126  | FLJ25530 |
| cg04057858 | 0.3919604 | -132.5224 | -0.2130853 | 0.6050456 | UNQ9391  |
| cg22772878 | 0.2483109 | -128.3638 | -0.2132087 | 0.4615197 | DIRAS1   |
| cg27168844 | 0.4210217 | -137.7253 | -0.2132559 | 0.6342776 | IL17     |
| cg12397274 | 0.2568856 | -127.8839 | -0.2133186 | 0.4702042 | TINAG    |
| cg08878744 | 0.3019855 | -126.5396 | -0.213352  | 0.5153375 | LCE1B    |
| cg18239253 | 0.3457292 | -128.1005 | -0.2134028 | 0.559132  | DEFB32   |
| cg15669228 | 0.373341  | -130.7074 | -0.2135097 | 0.5868507 | IFNA8    |
| cg09841009 | 0.5403412 | -182.4693 | -0.2135819 | 0.7539231 | GYPA     |
| cg23812886 | 0.3186032 | -127.1848 | -0.2136793 | 0.5322825 | SSX5     |
| cg02688643 | 0.5025941 | -163.5222 | -0.2137864 | 0.7163805 | MGST2    |
| cg23244913 | 0.153889  | -144.2315 | -0.2137977 | 0.3676866 | HCG9     |
| cg23075286 | 0.4112279 | -136.8663 | -0.2139214 | 0.6251493 | GALP     |
| cg00689340 | 0.353917  | -129.7504 | -0.2141831 | 0.5681001 | RTKN     |
| cg23110514 | 0.242092  | -130.0684 | -0.2142125 | 0.4563045 | LCE3E    |
| cg20692181 | 0.4011401 | -135.6025 | -0.214255  | 0.6153951 | RETN     |
| cg10479672 | 0.2168849 | -133.1109 | -0.2144896 | 0.4313744 | IL1F8    |
| cg13883681 | 0.2926494 | -128.0197 | -0.2145407 | 0.5071902 | GOT2     |
| cg13311440 | 0.3002273 | -128.0023 | -0.2145515 | 0.5147789 | CD48     |
| cg12067287 | 0.5419622 | -185.7683 | -0.2145916 | 0.7565538 | MYOM1    |
| cg07471052 | 0.6912712 | -350.9073 | -0.2146562 | 0.9059274 | CDK3     |
| cg00415993 | 0.236971  | -131.1608 | -0.2147586 | 0.4517296 | F2RL2    |
| cg03599338 | 0.3801426 | -133.3675 | -0.2148378 | 0.5949804 | SUSD2    |
| cg01185080 | 0.3349183 | -129.4686 | -0.2149505 | 0.5498688 | ZNF710   |
| cg20357806 | 0.4891322 | -160.2303 | -0.2149719 | 0.7041041 | PPBP     |
| cg09283007 | 0.6893535 | -350.9073 | -0.2150124 | 0.9043659 | FAM47B   |
| cg08453096 | 0.6108466 | -247.3811 | -0.2150458 | 0.8258924 | ABCG5    |
| cg18565355 | 0.2454918 | -130.8841 | -0.2151626 | 0.4606544 | RBM35A   |
| cg16142218 | 0.2581041 | -130.0146 | -0.2151653 | 0.4732695 | CHMP7    |
| cg20437604 | 0.4693387 | -153.4933 | -0.2152104 | 0.6845492 | ANXA9    |
| cg00400028 | 0.1572538 | -145.1556 | -0.2153033 | 0.3725572 | ACPL2    |
| cg21296676 | 0.3152098 | -129.2044 | -0.2153476 | 0.5305574 | EYA4     |
| cg15778232 | 0.3121729 | -129.2758 | -0.215463  | 0.5276359 | PHB2     |
| cg00443307 | 0.3707239 | -133.2959 | -0.2156    | 0.586324  | KLRG1    |
| cg09061733 | 0.3675256 | -133.1059 | -0.2157111 | 0.5832367 | SERPING1 |
| cg09863066 | 0.2141171 | -134.9926 | -0.2157774 | 0.4298946 | PVALB    |
| cg14519000 | 0.6609473 | -331.0442 | -0.2157993 | 0.8767466 | GATA5    |
| cg14722162 | 0.4359692 | -145.0562 | -0.2158352 | 0.6518043 | C5orf20  |



|            |            |           |            |           |               |
|------------|------------|-----------|------------|-----------|---------------|
| cg22927134 | 0.3244067  | -130.2336 | -0.2159289 | 0.5403357 | CHRM5         |
| cg10078829 | 0.2530355  | -131.3308 | -0.2160018 | 0.4690373 | KLK4          |
| cg06980053 | 0.2738036  | -130.3505 | -0.2160881 | 0.4898917 | RASSF1        |
| cg22879289 | 0.3186688  | -130.277  | -0.216127  | 0.5347958 | NID1          |
| cg09837648 | 0.6503305  | -312.0899 | -0.2162771 | 0.8666076 | PLXNB1        |
| cg10300154 | 0.4093744  | -140.0818 | -0.2162983 | 0.6256728 | MGC5297       |
| cg21274025 | 0.281818   | -130.4451 | -0.2163735 | 0.4981915 | PLA2G3        |
| cg09584711 | 0.2372671  | -133.1312 | -0.2164255 | 0.4536925 | HPR           |
| cg11873854 | 0.1787685  | -141.6731 | -0.216456  | 0.3952245 | LCN6          |
| cg26918728 | 0.6171473  | -260.3022 | -0.2164679 | 0.8336151 | SEMA3B        |
| cg11830061 | 0.6992174  | -350.9073 | -0.2165012 | 0.9157187 | INSL6         |
| cg00601486 | 0.6761953  | -350.9073 | -0.2165405 | 0.8927357 | H1T2          |
| cg27394486 | 0.5840925  | -224.0106 | -0.2167288 | 0.8008213 | C15orf2       |
| cg04245402 | 0.2816779  | -130.9797 | -0.2168075 | 0.4984854 | C19orf21      |
| cg04893119 | 0.2191464  | -135.7415 | -0.2169585 | 0.436105  | PI15          |
| cg13813391 | 0.511143   | -173.9554 | -0.2170066 | 0.7281497 | CMTM2         |
| cg12878228 | 0.3402456  | -132.5141 | -0.2170307 | 0.5572764 | PRSS1         |
| cg10818781 | 0.4043183  | -140.245  | -0.217043  | 0.6213614 | PHB2          |
| cg00895324 | 0.4890103  | -164.1299 | -0.2170513 | 0.7060616 | PCP4          |
| cg01637734 | 0.4004023  | -139.7323 | -0.2171453 | 0.6175476 | CD5L          |
| cg26111757 | 0.4709859  | -157.5133 | -0.2171469 | 0.6881328 | C20orf185     |
| cg20932053 | 0.4972988  | -168.0407 | -0.217262  | 0.7145607 | CPM           |
| cg21038703 | 0.4403934  | -148.5839 | -0.2173203 | 0.6577138 | ASB16         |
| cg08157292 | 0.3638799  | -135.213  | -0.2175336 | 0.5814134 | PPP1R7        |
| cg06625767 | 0.5548801  | -201.6053 | -0.2175353 | 0.7724154 | F12           |
| cg18294257 | 0.1683637  | -145.1941 | -0.2175619 | 0.3859255 | SEC14L3       |
| cg18665384 | 0.4396086  | -148.9671 | -0.2176832 | 0.6572918 | FLJ43505      |
| cg03557698 | 0.6514012  | -321.1516 | -0.2178113 | 0.8692125 | C1orf177      |
| cg09256683 | 0.3501018  | -134.357  | -0.2178668 | 0.5679686 | CCL14         |
| cg19756068 | 0.4151723  | -143.7057 | -0.2179558 | 0.6331282 | CYP2B6        |
| cg12019109 | 0.3712807  | -136.6958 | -0.2179871 | 0.5892678 | AZGP1         |
| cg01869233 | 0.1947005  | -140.6589 | -0.218089  | 0.4127895 | C20orf75      |
| cg10417559 | 0.5605789  | -207.4243 | -0.2180997 | 0.7786786 | LMO6          |
| cg07197059 | 0.1736573  | -144.8529 | -0.2182436 | 0.3919009 | EFS           |
| cg12610070 | 0.07413922 | -179.7906 | -0.2183644 | 0.2925036 | TSPAN15       |
| cg24304714 | 0.2191436  | -137.5163 | -0.2184564 | 0.4376    | LCE1C         |
| cg07895149 | 0.04221556 | -199.1546 | -0.2184665 | 0.260682  | FAM26B        |
| cg27413508 | 0.2290322  | -136.4914 | -0.2185328 | 0.447565  | COX4I2        |
| cg11346450 | 0.5081005  | -175.9323 | -0.2186785 | 0.726779  | UGT1A3        |
| cg24959428 | 0.3772226  | -138.5896 | -0.2187981 | 0.5960206 | GBP6          |
| cg11947493 | 0.06876281 | -183.2344 | -0.2188021 | 0.2875649 | TNFRSF10<br>D |
| cg18946226 | 0.1997719  | -140.7005 | -0.2188236 | 0.4185955 | MYR8          |
| cg23047271 | 0.1189278  | -160.9094 | -0.2188593 | 0.3377871 | PRICKLE2      |
| cg02787991 | 0.0521865  | -193.1426 | -0.2189128 | 0.2710993 | SECTM1        |

|            |            |           |            |           |           |
|------------|------------|-----------|------------|-----------|-----------|
| cg08886154 | 0.3267592  | -134.2325 | -0.218923  | 0.5456822 | PAX4      |
| cg14435807 | 0.1964029  | -141.4095 | -0.2189553 | 0.4153582 | LOXL1     |
| cg15234096 | 0.4806633  | -164.4338 | -0.2189617 | 0.699625  | LIX1      |
| cg17051440 | 0.4401723  | -151.4448 | -0.2190818 | 0.6592541 | CLDN2     |
| cg27513764 | 0.4443951  | -152.6489 | -0.219126  | 0.6635211 | EFCAB3    |
| cg25691167 | 0.04352194 | -199.1413 | -0.2191653 | 0.2626873 | FERD3L    |
| cg26796190 | 0.05529689 | -191.5952 | -0.2192307 | 0.2745275 | PYY       |
| cg11765205 | 0.1691265  | -147.0919 | -0.2192926 | 0.3884191 | ARL11     |
| cg11271605 | 0.06359672 | -186.7324 | -0.2193003 | 0.2828971 | STEAP4    |
| cg19464944 | 0.3258629  | -134.9559 | -0.2195054 | 0.5453683 | FCGR1A    |
| cg19998328 | 0.3448662  | -136.273  | -0.2195904 | 0.5644566 | LOC90580  |
| cg22253945 | 0.5642086  | -214.4371 | -0.2196057 | 0.7838143 | GPR45     |
| cg10478221 | 0.295736   | -134.3514 | -0.219615  | 0.5153511 | WFIKKN1   |
| cg20176989 | 0.3795344  | -140.1414 | -0.2196535 | 0.5991879 | KIR3DL2   |
| cg01678091 | 0.5313656  | -191.6507 | -0.2199598 | 0.7513254 | MAGEL2    |
| cg16536450 | 0.1941599  | -143.1292 | -0.2200889 | 0.4142489 | UNQ2541   |
| cg04201347 | 0.3106911  | -135.2078 | -0.2201276 | 0.5308187 | PRRG2     |
| cg17264470 | 0.6342062  | -300.0241 | -0.2201461 | 0.8543522 | FGF21     |
| cg02436686 | 0.2452273  | -136.9648 | -0.2201622 | 0.4653894 | GMFG      |
| cg09418321 | 0.2590023  | -136.1525 | -0.2202449 | 0.4792472 | DYRK4     |
| cg25697314 | 0.3959218  | -143.6953 | -0.2203423 | 0.6162641 | IL26      |
| cg21283680 | 0.4299857  | -151.1536 | -0.2205099 | 0.6504956 | SH3BP5    |
| cg03473518 | 0.08819252 | -175.5075 | -0.2205285 | 0.308721  | GJB6      |
| cg22247240 | 0.3882276  | -142.9196 | -0.2206712 | 0.6088988 | C14orf115 |
| cg01375994 | 0.3340873  | -137.0772 | -0.2207635 | 0.5548508 | MXRA5     |
| cg18538812 | 0.2209456  | -140.2407 | -0.2208844 | 0.44183   | GIF       |
| cg15869022 | 0.3385827  | -137.5363 | -0.2208846 | 0.5594673 | GPR17     |
| cg19832721 | 0.4032701  | -145.9696 | -0.220953  | 0.6242231 | KIAA1267  |
| cg11263296 | 0.08788155 | -176.235  | -0.2210053 | 0.3088868 | CCDC64    |
| cg25552889 | 0.5705702  | -224.0816 | -0.2210959 | 0.7916662 | C3orf40   |
| cg11405695 | 0.3023624  | -136.8433 | -0.2215078 | 0.5238702 | ATAD3C    |
| cg06615154 | 0.4653252  | -163.6456 | -0.221595  | 0.6869202 | S100A3    |
| cg26385286 | 0.2510631  | -138.3061 | -0.2216004 | 0.4726635 | GCNT2     |
| cg00152644 | 0.5996249  | -256.0463 | -0.2216013 | 0.8212262 | SPRR2E    |
| cg17386181 | 0.5113316  | -183.8912 | -0.2216226 | 0.7329543 | MT1B      |
| cg01899253 | 0.2300261  | -140.1652 | -0.2216457 | 0.4516717 | FLT1      |
| cg24625388 | 0.2909261  | -137.1249 | -0.2217905 | 0.5127165 | NEBL      |
| cg21541083 | 0.5846298  | -240.3475 | -0.2219664 | 0.8065962 | STXBP2    |
| cg16713808 | 0.4305414  | -153.749  | -0.2220292 | 0.6525706 | CRNN      |
| cg11695684 | 0.55246    | -211.6694 | -0.2221133 | 0.7745733 | CHRND     |
| cg05301852 | 0.3725627  | -142.7497 | -0.2221172 | 0.59468   | FABP1     |
| cg15589427 | 0.5123097  | -185.7342 | -0.2222306 | 0.7345403 | MUC4      |
| cg20802392 | 0.2954502  | -137.7523 | -0.2222802 | 0.5177305 | CTSK      |
| cg17910564 | 0.3571658  | -141.1437 | -0.2222942 | 0.57946   | VDAC3     |
| cg02719634 | 0.5613961  | -219.5149 | -0.2223199 | 0.783716  | SLC22A18  |

|            |            |           |            |           |               |
|------------|------------|-----------|------------|-----------|---------------|
|            |            |           |            |           | AS            |
| cg12970084 | 0.4554982  | -161.6629 | -0.2223577 | 0.677856  | ELF3          |
| cg20401945 | 0.1551918  | -154.1231 | -0.2223998 | 0.3775916 | ASPHD1        |
| cg24898863 | 0.1649623  | -152.2313 | -0.222789  | 0.3877513 | S100A8        |
| cg17542495 | 0.3562565  | -141.9153 | -0.2229066 | 0.5791631 | GJB1          |
| cg07126559 | 0.536364   | -202.0106 | -0.2229459 | 0.7593099 | SGCG          |
| cg12339029 | 0.5035224  | -182.7094 | -0.2229659 | 0.7264883 | MYL1          |
| cg00690280 | 0.284081   | -138.7964 | -0.2230377 | 0.5071188 | WFDC10B       |
| cg09686308 | 0.2636642  | -139.4449 | -0.2230748 | 0.486739  | CIB3          |
| cg16175725 | 0.5781155  | -237.2738 | -0.22313   | 0.8012456 | TCF1          |
| cg10248727 | 0.5871576  | -247.732  | -0.2234514 | 0.810609  | LCN1          |
| cg17199658 | 0.1948837  | -147.1178 | -0.223471  | 0.4183547 | MGC3971<br>5  |
| cg19787037 | 0.3244883  | -141.2455 | -0.2242672 | 0.5487555 | SPAG11        |
| cg13735697 | 0.5592067  | -223.2655 | -0.2243484 | 0.7835552 | MYOG          |
| cg18389810 | 0.6170886  | -289.843  | -0.2243766 | 0.8414651 | C14orf8       |
| cg02192965 | 0.466028   | -169.2007 | -0.224445  | 0.690473  | SLC3A1        |
| cg02046017 | 0.2452537  | -142.5378 | -0.2246582 | 0.469912  | LOC22007<br>0 |
| cg14826683 | 0.3159659  | -141.4468 | -0.2247215 | 0.5406874 | SPRR2D        |
| cg12069309 | 0.05419898 | -199.1859 | -0.224734  | 0.278933  | SEMA3B        |
| cg24949488 | 0.4483688  | -163.7039 | -0.2247871 | 0.6731559 | DNTT          |
| cg24724583 | 0.2042889  | -147.2377 | -0.2247881 | 0.429077  | PLXDC1        |
| cg17699374 | 0.236235   | -143.4334 | -0.2247939 | 0.4610289 | MGC3520<br>6  |
| cg25889160 | 0.6182504  | -293.8655 | -0.2249525 | 0.8432028 | SERPINA5      |
| cg16899036 | 0.3887607  | -149.4908 | -0.224973  | 0.6137337 | HOMER3        |
| cg08260891 | 0.07103567 | -189.7874 | -0.2250439 | 0.2960796 | PPGB          |
| cg23382741 | 0.4441042  | -162.9185 | -0.2251059 | 0.6692101 | PPP1R14D      |
| cg18462653 | 0.1794356  | -152.1623 | -0.2252869 | 0.4047224 | DEFB119       |
| cg14150666 | 0.6101303  | -283.0993 | -0.2252996 | 0.8354299 | IL8RB         |
| cg02656594 | 0.179003   | -152.2682 | -0.2253085 | 0.4043115 | IL21R         |
| cg05873268 | 0.5043819  | -188.4291 | -0.2254062 | 0.7297881 | TPSAB1        |
| cg00466436 | 0.2879899  | -141.8464 | -0.2254218 | 0.5134117 | DEFB126       |
| cg27157038 | 0.5245107  | -200.3029 | -0.2254696 | 0.7499803 | DNTT          |
| cg14724265 | 0.3324461  | -143.5034 | -0.2255582 | 0.5580043 | PPEF2         |
| cg11884243 | 0.5673147  | -234.791  | -0.2258155 | 0.7931302 | FCN2          |
| cg13269964 | 0.539158   | -211.3623 | -0.2258623 | 0.7650203 | CD300LG       |
| cg27160701 | 0.3551433  | -146.1363 | -0.2259488 | 0.5810921 | SBEM          |
| cg08403419 | 0.4211087  | -157.9952 | -0.2260093 | 0.647118  | RLN3R2        |
| cg19055231 | 0.05145439 | -202.6662 | -0.2260873 | 0.2775417 | STAC          |
| cg07846167 | 0.1047473  | -175.3048 | -0.2261591 | 0.3309064 | FBLIM1        |
| cg12943082 | 0.5181975  | -198.0099 | -0.2261671 | 0.7443646 | CCL26         |
| cg18783781 | 0.5446098  | -216.3206 | -0.226176  | 0.7707858 | MGC4399       |
| cg00673191 | 0.2208605  | -146.7696 | -0.2261807 | 0.4470413 | DOPEY2        |

|            |            |           |            |           |          |
|------------|------------|-----------|------------|-----------|----------|
| cg17915429 | 0.431575   | -161.1473 | -0.2262089 | 0.6577839 | PGLYRP2  |
| cg19642007 | 0.4449609  | -165.2708 | -0.2262767 | 0.6712376 | TNNT3    |
| cg25778479 | 0.1615061  | -157.3392 | -0.226286  | 0.3877921 | ANKMY2   |
| cg10037005 | 0.1763295  | -154.0781 | -0.226345  | 0.4026746 | CD37     |
| cg12891678 | 0.1830525  | -152.7966 | -0.2263812 | 0.4094338 | SPRR2D   |
| cg04891836 | 0.4182208  | -157.9778 | -0.2264282 | 0.644649  | TNFSF14  |
| cg22909609 | 0.2755294  | -143.3806 | -0.226487  | 0.5020164 | ITGBL1   |
| cg05755354 | 0.3323494  | -144.8529 | -0.2265263 | 0.5588757 | FRMD4A   |
| cg12992720 | 0.2382919  | -145.4538 | -0.2265437 | 0.4648356 | EDG4     |
| cg16794682 | 0.5268843  | -204.4933 | -0.2265614 | 0.7534457 | CCND1    |
| cg05600717 | 0.07995365 | -187.1476 | -0.2266461 | 0.3065997 | FLJ13639 |
| cg11015241 | 0.634205   | -329.2807 | -0.2268097 | 0.8610147 | ATP10A   |
| cg21825364 | 0.6830851  | -350.9073 | -0.2269108 | 0.9099959 | VCY      |
| cg24765079 | 0.2173192  | -148.5839 | -0.2272957 | 0.4446149 | CDH1     |
| cg23765993 | 0.2532326  | -145.3878 | -0.2273368 | 0.4805694 | SPINLW1  |
| cg06437862 | 0.5326996  | -210.6842 | -0.2274309 | 0.7601305 | TUBA2    |
| cg01993576 | 0.1621737  | -158.7947 | -0.2275828 | 0.3897566 | SLC29A1  |
| cg21643191 | 0.3965181  | -155.214  | -0.2277313 | 0.6242494 | ABCB5    |
| cg13760253 | 0.4203822  | -160.7392 | -0.2277336 | 0.6481158 | DNAJC5B  |
| cg01718139 | 0.5379295  | -215.6454 | -0.2278644 | 0.7657939 | UNQ3033  |
| cg16480209 | 0.6291769  | -325.068  | -0.2279693 | 0.8571462 | CNGB1    |
| cg19421752 | 0.1716104  | -157.3165 | -0.2281314 | 0.3997418 | SLC6A18  |
| cg02966851 | 0.2592571  | -146.3076 | -0.228301  | 0.4875581 | C6orf149 |
| cg11052143 | 0.1789931  | -156.0509 | -0.2283745 | 0.4073675 | ALS2CR11 |
| cg10329418 | 0.2383638  | -147.8512 | -0.2284304 | 0.4667942 | PON3     |
| cg09038914 | 0.5243647  | -207.6023 | -0.2285109 | 0.7528756 | GFAP     |
| cg26531804 | 0.2487185  | -147.2117 | -0.2285404 | 0.4772589 | SPINT1   |
| cg12228229 | 0.4984097  | -192.2255 | -0.2285881 | 0.7269978 | DLG4     |
| cg02280309 | 0.42963    | -164.9054 | -0.2286949 | 0.658325  | PKLR     |
| cg23355492 | 0.4103187  | -159.8808 | -0.2287142 | 0.6390329 | SP6      |
| cg04705866 | 0.4650277  | -177.1943 | -0.2288022 | 0.6938299 | GZMK     |
| cg20342105 | 0.270357   | -146.6669 | -0.2288948 | 0.4992518 | BSCL2    |
| cg09142399 | 0.426912   | -164.8276 | -0.2290908 | 0.6560028 | CRYZ     |
| cg11297236 | 0.2800744  | -146.7874 | -0.2291363 | 0.5092107 | PDILT    |
| cg23696886 | 0.1641714  | -160.3256 | -0.2291782 | 0.3933496 | PDLIM2   |
| cg01507173 | 0.4048771  | -159.6427 | -0.2293324 | 0.6342095 | IL1F5    |
| cg21301440 | 0.11227    | -176.3406 | -0.2293641 | 0.3416341 | CYGB     |
| cg23807646 | 0.367607   | -152.808  | -0.2293968 | 0.5970038 | SLC26A8  |
| cg06906435 | 0.3065723  | -147.6392 | -0.2295409 | 0.5361133 | FLJ25773 |
| cg01248426 | 0.2026985  | -153.5775 | -0.2297055 | 0.432404  | ATP6V0D2 |
| cg14168975 | 0.346471   | -150.7108 | -0.2297406 | 0.5762116 | ALAS2    |
| cg16998872 | 0.5256788  | -211.8899 | -0.2298679 | 0.7555467 | GYPE     |
| cg04254916 | 0.6321538  | -339.4816 | -0.2299014 | 0.8620552 | KRT5     |
| cg06385087 | 0.05879917 | -203.0736 | -0.2299806 | 0.2887798 | CTSZ     |
| cg13859324 | 0.270193   | -148.4751 | -0.230262  | 0.500455  | UNC45B   |

|            |           |           |            |           |               |
|------------|-----------|-----------|------------|-----------|---------------|
| cg23065097 | 0.2097233 | -153.3051 | -0.2302776 | 0.4400008 | FKBP1B        |
| cg22022041 | 0.5188516 | -208.619  | -0.2304199 | 0.7492716 | CCR9          |
| cg06985415 | 0.6165904 | -313.8571 | -0.2304736 | 0.847064  | C10orf39      |
| cg13705284 | 0.2825772 | -148.5839 | -0.2304995 | 0.5130768 | ACOX2         |
| cg03294491 | 0.1966875 | -155.52   | -0.2305071 | 0.4271945 | SMAD2         |
| cg24816455 | 0.2476251 | -149.8381 | -0.2305128 | 0.4781379 | SEMA3B        |
| cg08555657 | 0.5143694 | -206.0144 | -0.2305465 | 0.7449159 | SPRR2E        |
| cg25101056 | 0.4583081 | -178.0106 | -0.2305754 | 0.6888835 | KCNG4         |
| cg16008138 | 0.2298659 | -151.5702 | -0.2307297 | 0.4605955 | RNF190        |
| cg05696092 | 0.2538898 | -149.9525 | -0.2308896 | 0.4847794 | NOSIP         |
| cg22478614 | 0.3275118 | -150.7156 | -0.2309271 | 0.5584389 | DEFB4         |
| cg27069753 | 0.29301   | -149.2766 | -0.2309805 | 0.5239905 | ELA3B         |
| cg00687674 | 0.2423377 | -150.833  | -0.2309857 | 0.4733233 | TMEM84        |
| cg21495715 | 0.4840759 | -190.134  | -0.2310039 | 0.7150798 | SLC5A10       |
| cg09923671 | 0.4514466 | -176.2452 | -0.2310114 | 0.682458  | GATA5         |
| cg13281868 | 0.4304577 | -169.5532 | -0.231183  | 0.6616407 | C6orf142      |
| cg17141902 | 0.3959036 | -160.7659 | -0.2312211 | 0.6271248 | NINJ1         |
| cg03956628 | 0.1680624 | -162.2299 | -0.2314013 | 0.3994637 | MLH1          |
| cg00134787 | 0.3592277 | -154.8626 | -0.2315428 | 0.5907705 | MYH1          |
| cg00819362 | 0.5384888 | -226.6992 | -0.2318727 | 0.7703615 | CLIPR-59      |
| cg09448875 | 0.3222505 | -151.7146 | -0.2318981 | 0.5541486 | ABCC2         |
| cg22220722 | 0.5414824 | -229.5885 | -0.2320251 | 0.7735075 | PLA2G2A       |
| cg02397720 | 0.1140501 | -179.1648 | -0.2321042 | 0.3461542 | RAB17         |
| cg23458892 | 0.4211052 | -168.9052 | -0.2323492 | 0.6534544 | SIGLEC7       |
| cg15518950 | 0.2399518 | -152.7701 | -0.2323629 | 0.4723147 | PRP2          |
| cg08424423 | 0.5684884 | -256.0872 | -0.2323891 | 0.8008775 | CDSN          |
| cg22013966 | 0.6085786 | -308.7188 | -0.2324064 | 0.8409851 | SERPINA1<br>3 |
| cg22189286 | 0.4585115 | -181.7559 | -0.2324412 | 0.6909527 | HSPB8         |
| cg25994725 | 0.3292266 | -153.4918 | -0.2327999 | 0.5620265 | C6orf81       |
| cg19592945 | 0.1893228 | -159.7636 | -0.2328193 | 0.4221421 | P2RXL1        |
| cg07879977 | 0.2922124 | -151.7842 | -0.2328299 | 0.5250422 | OR1F1         |
| cg06785429 | 0.2454114 | -153.0804 | -0.2329023 | 0.4783137 | DCUN1D1       |
| cg22805308 | 0.2908704 | -151.9169 | -0.2329435 | 0.5238139 | PLEKHG5       |
| cg24698533 | 0.4500591 | -179.5296 | -0.2329807 | 0.6830398 | LYZL2         |
| cg07790638 | 0.4260127 | -171.5296 | -0.233036  | 0.6590487 | LOC91431      |
| cg18204685 | 0.4529203 | -180.9862 | -0.2331687 | 0.686089  | BTD           |
| cg16175792 | 0.3125194 | -153.1801 | -0.2333517 | 0.5458711 | HSD3B1        |
| cg03104936 | 0.4046973 | -166.7381 | -0.2335962 | 0.6382935 | GRB10         |
| cg15741706 | 0.4614491 | -185.3063 | -0.233613  | 0.6950621 | CXorf48       |
| cg02981703 | 0.5761535 | -269.739  | -0.2339011 | 0.8100545 | CA6           |
| cg19987219 | 0.4269951 | -173.7807 | -0.2341024 | 0.6610975 | FLJ32011      |
| cg06885782 | 0.2540874 | -154.1517 | -0.2341205 | 0.4882079 | KCNQ4         |
| cg21808053 | 0.2914125 | -153.6368 | -0.2342061 | 0.5256186 | DIRAS3        |
| cg01987509 | 0.3510443 | -157.9987 | -0.2343061 | 0.5853504 | PGR           |

|            |            |           |            |           |           |
|------------|------------|-----------|------------|-----------|-----------|
| cg20261167 | 0.1784396  | -163.7647 | -0.2343406 | 0.4127803 | SPP1      |
| cg26895595 | 0.2702616  | -153.9591 | -0.2343987 | 0.5046603 | MAGEB3    |
| cg21789545 | 0.2413751  | -155.3196 | -0.2344029 | 0.4757778 | COL9A1    |
| cg16466334 | 0.4219441  | -172.8054 | -0.2344114 | 0.6563554 | MMP3      |
| cg07595943 | 0.6823382  | -350.9073 | -0.2344543 | 0.9167925 | LOC161931 |
| cg22609784 | 0.2160303  | -157.9952 | -0.2345483 | 0.4505785 | MSX1      |
| cg15060813 | 0.2748302  | -154.1424 | -0.2345971 | 0.5094273 | LRFN3     |
| cg05341878 | 0.3058885  | -154.675  | -0.2346421 | 0.5405307 | RIMS2     |
| cg09528351 | 0.4567631  | -185.6161 | -0.2347355 | 0.6914986 | PIK3R5    |
| cg03291145 | 0.4095829  | -170.16   | -0.2348679 | 0.6444508 | ARSF      |
| cg11061975 | 0.3117694  | -155.4776 | -0.2350102 | 0.5467796 | SIRPB2    |
| cg15798153 | 0.1905266  | -162.3667 | -0.2350137 | 0.4255403 | PFTK1     |
| cg00463202 | 0.5348554  | -232.5842 | -0.2350902 | 0.7699456 | ADPRHL1   |
| cg09492887 | 0.1130298  | -183.5744 | -0.2352288 | 0.3482586 | SLC26A5   |
| cg10368842 | 0.3807105  | -164.5547 | -0.2354437 | 0.6161542 | C10orf81  |
| cg26333641 | 0.4712773  | -193.9764 | -0.2357056 | 0.7069829 | IL22      |
| cg13703437 | 0.3960448  | -168.2897 | -0.2357234 | 0.6317682 | FYB       |
| cg07443748 | 0.3406576  | -159.1145 | -0.235846  | 0.5765036 | CESK1     |
| cg14587868 | 0.4104374  | -172.1756 | -0.2358879 | 0.6463253 | TGM1      |
| cg14107638 | 0.4402544  | -181.8721 | -0.2360671 | 0.6763214 | MAGEA5    |
| cg13126790 | 0.4434139  | -183.6455 | -0.2363805 | 0.6797944 | FLJ27255  |
| cg17288121 | 0.4067739  | -172.4792 | -0.2366167 | 0.6433907 | DEFB103A  |
| cg14696870 | 0.3900684  | -168.7868 | -0.2368159 | 0.6268843 | FCER1A    |
| cg01459162 | 0.5528036  | -254.0708 | -0.2369291 | 0.7897327 | PADI3     |
| cg19985911 | 0.5192215  | -225.563  | -0.2370173 | 0.7562389 | AVIL      |
| cg26420196 | 0.2351041  | -159.3287 | -0.2370222 | 0.4721264 | GAS6      |
| cg19841506 | 0.1106095  | -186.8293 | -0.2370513 | 0.3476608 | ZMYND15   |
| cg03379131 | 0.04891143 | -218.6526 | -0.237059  | 0.2859704 | ADAM15    |
| cg09799714 | 0.4701945  | -196.3864 | -0.2370938 | 0.7072884 | PDZD3     |
| cg05330360 | 0.3038379  | -158.5482 | -0.2373992 | 0.5412371 | ZPBP2     |
| cg08728865 | 0.5539772  | -257.4603 | -0.2376339 | 0.7916111 | NALP7     |
| cg00075967 | 0.4774713  | -201.5144 | -0.237791  | 0.7152622 | STRA6     |
| cg05955301 | 0.2729245  | -158.6876 | -0.2378604 | 0.5107849 | PRELP     |
| cg18565510 | 0.6731143  | -350.9073 | -0.2379687 | 0.911083  | CENTB5    |
| cg23022999 | 0.3996152  | -173.2894 | -0.2381334 | 0.6377487 | FLJ45909  |
| cg18333690 | 0.4589587  | -194.542  | -0.2386647 | 0.6976234 | PADI4     |
| cg11584690 | 0.1224123  | -184.757  | -0.2387963 | 0.3612086 | ZNF574    |
| cg19257200 | 0.508251   | -222.385  | -0.2388061 | 0.7470571 | SOX10     |
| cg07864297 | 0.1751472  | -170.2169 | -0.2388073 | 0.4139546 | ESRRB     |
| cg10370591 | 0.3806129  | -170.2233 | -0.2388958 | 0.6195087 | TPO       |
| cg23328404 | 0.3664506  | -167.9169 | -0.2391214 | 0.605572  | ChGn      |
| cg08023751 | 0.4879117  | -210.3662 | -0.239152  | 0.7270638 | MERTK     |
| cg20516209 | 0.3938994  | -173.791  | -0.2392322 | 0.6331316 | EMILIN1   |
| cg05131835 | 0.4142895  | -179.306  | -0.2392481 | 0.6535376 | GH2       |

|            |            |           |            |           |          |
|------------|------------|-----------|------------|-----------|----------|
| cg04744379 | 0.5044484  | -221.1051 | -0.2393131 | 0.7437615 | KLK15    |
| cg16176600 | 0.4951427  | -215.2786 | -0.2393818 | 0.7345245 | FRK      |
| cg26353877 | 0.5141768  | -228.1043 | -0.239401  | 0.7535778 | APCS     |
| cg27337148 | 0.1969946  | -167.2433 | -0.23956   | 0.4365545 | CAMK1G   |
| cg20713492 | 0.09101804 | -198.4492 | -0.2395982 | 0.3306163 | AQP10    |
| cg01568736 | 0.5000551  | -218.9509 | -0.2396178 | 0.7396729 | SERPINB7 |
| cg16381688 | 0.3092366  | -162.4767 | -0.2399009 | 0.5491374 | THEM2    |
| cg22971191 | 0.276719   | -161.7493 | -0.2400569 | 0.516776  | SLC10A2  |
| cg00209066 | 0.5625432  | -274.9658 | -0.2401754 | 0.8027186 | BRD1     |
| cg01325515 | 0.5505856  | -262.1735 | -0.2402402 | 0.7908258 | CTAG2    |
| cg13530039 | 0.2933781  | -162.2794 | -0.2402553 | 0.5336334 | CHRM1    |
| cg16507522 | 0.5216398  | -236.4668 | -0.2404053 | 0.7620451 | SERPINA3 |
| cg14297029 | 0.6012787  | -330.2034 | -0.2404382 | 0.8417169 | SSTR3    |
| cg08784110 | 0.2990796  | -163.1889 | -0.2407375 | 0.5398171 | MAS1     |
| cg06226384 | 0.1633861  | -175.5028 | -0.2408417 | 0.4042277 | CACNG5   |
| cg18920397 | 0.46179    | -200.584  | -0.2409194 | 0.7027093 | LY9      |
| cg25710140 | 0.4495993  | -195.4037 | -0.2410518 | 0.6906511 | MID1     |
| cg16075940 | 0.5045261  | -226.2    | -0.2413285 | 0.7458546 | FLJ37396 |
| cg18982568 | 0.3510721  | -169.0281 | -0.2413616 | 0.5924338 | KRT1B    |
| cg26523005 | 0.306715   | -164.5915 | -0.2414375 | 0.5481524 | ZNF662   |
| cg03782727 | 0.6137362  | -350.9073 | -0.2414793 | 0.8552155 | FFAR1    |
| cg05500074 | 0.4656135  | -203.8556 | -0.2415693 | 0.7071827 | TSKS     |
| cg18766847 | 0.3932123  | -178.1322 | -0.2418186 | 0.6350309 | ACMSD    |
| cg15895197 | 0.158151   | -178.0749 | -0.241832  | 0.399983  | EMILIN1  |
| cg21723486 | 0.3468644  | -169.2628 | -0.2418995 | 0.5887639 | TP73L    |
| cg05822532 | 0.2986178  | -164.8699 | -0.2419054 | 0.5405232 | ELN      |
| cg22855405 | 0.1716661  | -175.5144 | -0.2422623 | 0.4139284 | TINAGL1  |
| cg03366382 | 0.4890176  | -218.4566 | -0.24227   | 0.7312876 | INS      |
| cg09931793 | 0.448926   | -197.6521 | -0.242273  | 0.6911989 | OR2K2    |
| cg25043279 | 0.4432854  | -195.3554 | -0.242311  | 0.6855964 | C7orf33  |
| cg06810461 | 0.4381541  | -193.3352 | -0.242316  | 0.6804701 | AGRP     |
| cg05135288 | 0.2329063  | -166.7095 | -0.2423375 | 0.4752438 | RHOT2    |
| cg27349244 | 0.4093955  | -183.5885 | -0.242368  | 0.6517636 | MLXIP    |
| cg25531166 | 0.524059   | -243.8339 | -0.242375  | 0.766434  | CTAG1B   |
| cg15670863 | 0.4231112  | -187.985  | -0.2423877 | 0.6654989 | SPACA4   |
| cg06022562 | 0.5699813  | -292.3829 | -0.2425939 | 0.8125752 | FLJ13841 |
| cg06259570 | 0.3810374  | -176.6408 | -0.2426255 | 0.6236629 | MMP27    |
| cg14141399 | 0.2637815  | -166.0084 | -0.2429678 | 0.5067493 | HAS1     |
| cg05112299 | 0.2549141  | -166.6003 | -0.2432013 | 0.4981154 | OR7A17   |
| cg21964481 | 0.4155403  | -187.0949 | -0.2432394 | 0.6587797 | SLC34A3  |
| cg24623694 | 0.2142798  | -169.8216 | -0.2432625 | 0.4575422 | PRX      |
| cg15903395 | 0.4116313  | -186.0563 | -0.2433438 | 0.6549752 | FLJ25369 |
| cg09207718 | 0.3235166  | -168.8571 | -0.2433947 | 0.5669113 | CYP1A2   |
| cg20856834 | 0.389303   | -179.9812 | -0.2434166 | 0.6327196 | OR12D3   |
| cg25168545 | 0.2426487  | -167.5465 | -0.2434468 | 0.4860955 | GIMAP1   |

|            |            |           |            |           |               |
|------------|------------|-----------|------------|-----------|---------------|
| cg24489034 | 0.4475341  | -199.5867 | -0.2434967 | 0.6910307 | LW-1          |
| cg02882813 | 0.5218526  | -245.4055 | -0.2435917 | 0.7654443 | CST5          |
| cg19372178 | 0.2275309  | -168.9052 | -0.2435988 | 0.4711297 | TMEM16G       |
| cg14015044 | 0.04604905 | -229.3737 | -0.2436859 | 0.289735  | TNFRSF10<br>C |
| cg02786019 | 0.3388598  | -171.1422 | -0.2437592 | 0.5826191 | TRPV6         |
| cg06836849 | 0.1417844  | -185.1839 | -0.2438387 | 0.3856231 | SLC17A8       |
| cg11898695 | 0.4907263  | -223.4912 | -0.2438994 | 0.7346257 | PTCRA         |
| cg19971655 | 0.6510079  | -350.9073 | -0.24391   | 0.8949178 | BSND          |
| cg10837843 | 0.1073998  | -197.1173 | -0.2439292 | 0.351329  | DUSP1         |
| cg16545105 | 0.4129382  | -187.9402 | -0.2441233 | 0.6570615 | CRHBP         |
| cg00319692 | 0.2559521  | -168.0407 | -0.2442444 | 0.5001965 | ATP6V0D2      |
| cg16377880 | 0.3531597  | -174.0202 | -0.2442524 | 0.5974121 | CYP4F3        |
| cg00795812 | 0.1479124  | -184.022  | -0.2442826 | 0.392195  | PDCD1         |
| cg18473117 | 0.453528   | -204.2233 | -0.2444073 | 0.6979352 | CCDC22        |
| cg05547500 | 0.5844959  | -320.561  | -0.2446399 | 0.8291358 | TXNDC2        |
| cg11939496 | 0.4132572  | -189.6451 | -0.2449679 | 0.6582251 | CD244         |
| cg18192417 | 0.1370659  | -188.0992 | -0.2449868 | 0.3820527 | NEBL          |
| cg15005385 | 0.3242052  | -171.5215 | -0.2450848 | 0.56929   | CCL3L1        |
| cg08356693 | 0.2940523  | -169.4868 | -0.2451619 | 0.5392143 | ITLN1         |
| cg12354377 | 0.2823775  | -169.1964 | -0.2451981 | 0.5275756 | ANK3          |
| cg19464252 | 0.2617358  | -169.2339 | -0.2452095 | 0.5069454 | FBS1          |
| cg25462291 | 0.1206812  | -193.9982 | -0.2453485 | 0.3660297 | HEYL          |
| cg03534410 | 0.616232   | -350.9073 | -0.2454309 | 0.8616629 | TMEM40        |
| cg17706173 | 0.1927849  | -176.0696 | -0.2456352 | 0.43842   | C16orf30      |
| cg18530716 | 0.09523508 | -204.657  | -0.2457115 | 0.3409466 | SLC16A11      |
| cg01479232 | 0.349361   | -176.1423 | -0.2459197 | 0.5952808 | C20orf54      |
| cg26504906 | 0.2368069  | -171.4516 | -0.2459755 | 0.4827824 | PRSS16        |
| cg04655481 | 0.4559184  | -209.0061 | -0.2460748 | 0.7019932 | GPR21         |
| cg03872376 | 0.3897094  | -185.3063 | -0.2463292 | 0.6360386 | ZP4           |
| cg11113534 | 0.6095824  | -350.9073 | -0.2463909 | 0.8559733 | C20orf70      |
| cg24621042 | 0.296464   | -171.4813 | -0.2464228 | 0.5428869 | SERPINA1      |
| cg19465374 | 0.5284137  | -259.5718 | -0.2464707 | 0.7748845 | AZGP1         |
| cg19382175 | 0.4808663  | -223.6324 | -0.24648   | 0.7273464 | PDE6A         |
| cg19226099 | 0.306684   | -172.4143 | -0.2466308 | 0.5533149 | MC3R          |
| cg24214470 | 0.4612129  | -212.9703 | -0.2466503 | 0.7078633 | SERPINF1      |
| cg13053608 | 0.2642931  | -171.3309 | -0.246697  | 0.5109901 | LGP1          |
| cg08766149 | 0.4392699  | -202.8599 | -0.2467545 | 0.6860244 | GZMB          |
| cg25107791 | 0.3311979  | -174.9779 | -0.2467652 | 0.5779631 | CLPS          |
| cg00520135 | 0.6086764  | -350.9073 | -0.2468423 | 0.8555187 | TPM1          |
| cg09971646 | 0.1621413  | -184.0239 | -0.2469941 | 0.4091354 | DLK1          |
| cg04450876 | 0.5375122  | -270.3395 | -0.2470804 | 0.7845926 | FAM112B       |
| cg03752885 | 0.2779784  | -172.0201 | -0.2471697 | 0.5251481 | DAPK3         |
| cg11750883 | 0.3120439  | -173.765  | -0.2472331 | 0.5592771 | C1orf42       |
| cg00367281 | 0.386657   | -186.3491 | -0.2473636 | 0.6340206 | CHRN3         |



|            |           |           |            |           |               |
|------------|-----------|-----------|------------|-----------|---------------|
| cg17091851 | 0.280007  | -172.557  | -0.2475104 | 0.5275174 | LOC34817<br>4 |
| cg09573795 | 0.3370109 | -177.355  | -0.2477783 | 0.5847892 | MSX1          |
| cg03916421 | 0.1779967 | -182.0055 | -0.2480288 | 0.4260255 | LOC13232<br>1 |
| cg22780475 | 0.3325285 | -177.6143 | -0.2483072 | 0.5808358 | CBLC          |
| cg00350478 | 0.3563172 | -181.4296 | -0.2483614 | 0.6046786 | FRMD1         |
| cg01917648 | 0.2766789 | -173.8234 | -0.2483953 | 0.5250742 | SPIC          |
| cg11456838 | 0.2966399 | -174.7995 | -0.2485874 | 0.5452273 | LOC20245<br>9 |
| cg05492113 | 0.4173601 | -198.2513 | -0.2486951 | 0.6660552 | TUB           |
| cg19812619 | 0.5910724 | -348.563  | -0.2487647 | 0.8398371 | ITGB7         |
| cg05564657 | 0.631236  | -350.9073 | -0.248958  | 0.880194  | AADAC         |
| cg06825166 | 0.2854198 | -175.343  | -0.2492723 | 0.5346922 | TMEM10        |
| cg07123548 | 0.5677515 | -314.2797 | -0.2493117 | 0.8170632 | HIPK4         |
| cg14652095 | 0.2617222 | -175.2812 | -0.249368  | 0.5110902 | HIST1H1A      |
| cg14162076 | 0.5803103 | -333.5074 | -0.2494431 | 0.8297534 | CLEC4D        |
| cg21745164 | 0.2857738 | -175.5991 | -0.2494467 | 0.5352205 | LOC63928      |
| cg21458041 | 0.3760006 | -187.8548 | -0.2496661 | 0.6256666 | TNP2          |
| cg07446846 | 0.5402787 | -281.901  | -0.2497947 | 0.7900734 | SLC6A8        |
| cg16222568 | 0.4599063 | -219.5274 | -0.2498147 | 0.709721  | APEG1         |
| cg23413307 | 0.3941059 | -193.3295 | -0.2500397 | 0.6441457 | LCE1F         |
| cg12582965 | 0.6087851 | -350.9073 | -0.2500845 | 0.8588696 | ATP10A        |
| cg16463460 | 0.2313762 | -177.7201 | -0.250118  | 0.4814942 | WT1           |
| cg02658251 | 0.3980147 | -195.0707 | -0.2503539 | 0.6483686 | DEFB4         |
| cg14333565 | 0.5411022 | -284.6871 | -0.2503644 | 0.7914666 | NRTN          |
| cg22627427 | 0.5946591 | -350.9073 | -0.2504698 | 0.8451289 | C11orf9       |
| cg18971671 | 0.4436382 | -212.9485 | -0.2505309 | 0.6941691 | TULP2         |
| cg10490064 | 0.465119  | -224.1186 | -0.2505617 | 0.7156807 | CRYBB2        |
| cg00174500 | 0.2333053 | -179.0546 | -0.2511387 | 0.4844441 | CMTM5         |
| cg16358738 | 0.473022  | -230.8851 | -0.2514282 | 0.7244502 | AGXT          |
| cg04816348 | 0.614647  | -350.9073 | -0.2516205 | 0.8662676 | CLEC4G        |
| cg13424229 | 0.5240545 | -271.1755 | -0.2516502 | 0.7757047 | CPA3          |
| cg17788013 | 0.4457936 | -216.6452 | -0.2517211 | 0.6975147 | SPINK5        |
| cg12029639 | 0.1884555 | -185.3217 | -0.2518015 | 0.440257  | MAB21L1       |
| cg06233503 | 0.3121909 | -180.9862 | -0.2518145 | 0.5640055 | KCNQ1         |
| cg02601403 | 0.5175419 | -265.6017 | -0.2518361 | 0.7693781 | TBC1D3C       |
| cg26917999 | 0.3767893 | -191.9695 | -0.251842  | 0.6286312 | LZTS1         |
| cg23580945 | 0.4980093 | -249.1964 | -0.2518596 | 0.7498689 | FLJ43826      |
| cg04739485 | 0.3668079 | -189.7077 | -0.2519    | 0.618708  | MLXIP         |
| cg05559445 | 0.2271053 | -180.7139 | -0.2519604 | 0.4790657 | CDKN1C        |
| cg18490846 | 0.2738503 | -179.3574 | -0.2521126 | 0.5259629 | C17orf73      |
| cg13608094 | 0.6114283 | -350.9073 | -0.252701  | 0.8641294 | CCND1         |
| cg12266049 | 0.5711331 | -332.6861 | -0.2527472 | 0.8238803 | CCND1         |
| cg08475088 | 0.5957056 | -350.9073 | -0.2527931 | 0.8484987 | NALP9         |

|            |            |           |            |           |           |
|------------|------------|-----------|------------|-----------|-----------|
| cg21985470 | 0.2822447  | -180.7139 | -0.252865  | 0.5351098 | PKLR      |
| cg04557383 | 0.07212877 | -226.2256 | -0.2531221 | 0.3252509 | MT1H      |
| cg26457013 | 0.3774127  | -194.4951 | -0.2531404 | 0.6305531 | TMEM86B   |
| cg23464269 | 0.2896488  | -181.8236 | -0.2533827 | 0.5430315 | UGT1A3    |
| cg05654163 | 0.3764358  | -195.8936 | -0.2540453 | 0.6304811 | SLC39A2   |
| cg03087937 | 0.432557   | -215.5817 | -0.2540568 | 0.6866138 | MUC15     |
| cg06958211 | 0.3432128  | -188.9651 | -0.2541486 | 0.5973614 | PAK6      |
| cg19000186 | 0.4142048  | -208.7541 | -0.2544612 | 0.668666  | CNGA1     |
| cg26218269 | 0.2342199  | -183.9594 | -0.2545534 | 0.4887733 | MAB21L2   |
| cg24910675 | 0.1594974  | -195.0963 | -0.2546136 | 0.4141111 | ENG       |
| cg19845843 | 0.455281   | -228.5964 | -0.2547853 | 0.7100663 | CXorf20   |
| cg13439299 | 0.5698609  | -339.3887 | -0.2548905 | 0.8247514 | DNAJC5G   |
| cg01668126 | 0.4320999  | -217.2703 | -0.2549283 | 0.6870282 | MSR1      |
| cg24477636 | 0.3071865  | -185.6198 | -0.2549917 | 0.5621782 | OR10H1    |
| cg24331162 | 0.459417   | -231.5745 | -0.2550464 | 0.7144635 | SYT8      |
| cg04637372 | 0.3479323  | -191.5028 | -0.2551271 | 0.6030594 | FLJ32784  |
| cg04273431 | 0.1339154  | -202.9057 | -0.255153  | 0.3890684 | PRR3      |
| cg19903229 | 0.2802493  | -184.1742 | -0.2551539 | 0.5354032 | C14orf105 |
| cg09458237 | 0.4386228  | -221.975  | -0.2556592 | 0.694282  | HSPA12B   |
| cg00392257 | 0.3472518  | -192.3436 | -0.2556834 | 0.6029352 | ISG20L2   |
| cg06277277 | 0.2296256  | -186.2598 | -0.255922  | 0.4855476 | NR1I3     |
| cg03544379 | 0.2363008  | -185.9764 | -0.256019  | 0.4923198 | OR7C2     |
| cg00644033 | 0.6615375  | -350.9073 | -0.256029  | 0.9175664 | MUC3B     |
| cg19368582 | 0.3909751  | -203.8685 | -0.2560573 | 0.6470323 | MMRN2     |
| cg16673198 | 0.3814149  | -201.0927 | -0.2561057 | 0.6375206 | CPNE4     |
| cg08816023 | 0.2796646  | -186.0659 | -0.2563922 | 0.5360569 | FGF1      |
| cg12954718 | 0.2345788  | -186.6541 | -0.2564095 | 0.4909883 | USP6      |
| cg06489008 | 0.2967849  | -187.172  | -0.2565051 | 0.55329   | CST11     |
| cg19561774 | 0.6027277  | -350.9073 | -0.2565181 | 0.8592458 | SLC22A2   |
| cg10586756 | 0.4244114  | -217.4762 | -0.2565938 | 0.6810052 | NUP93     |
| cg19824441 | 0.3740127  | -200.001  | -0.2565977 | 0.6306103 | ADMR      |
| cg24516901 | 0.2079776  | -189.5923 | -0.2567803 | 0.4647579 | FLJ22746  |
| cg13125510 | 0.213477   | -189.1798 | -0.2569255 | 0.4704025 | C11orf44  |
| cg22585988 | 0.4292986  | -221.1051 | -0.2572476 | 0.6865462 | PVRL4     |
| cg00714377 | 0.1400816  | -204.6783 | -0.2577557 | 0.3978373 | SLA2      |
| cg03352153 | 0.4373219  | -226.4778 | -0.2579542 | 0.6952761 | GLULD1    |
| cg24825722 | 0.3377493  | -194.5995 | -0.2579682 | 0.5957175 | ACADVL    |
| cg08314660 | 0.589784   | -350.9073 | -0.2579715 | 0.8477555 | PKP3      |
| cg02202484 | 0.3573456  | -198.4713 | -0.2579791 | 0.6153247 | SPRR4     |
| cg19717326 | 0.1893071  | -194.0196 | -0.2580463 | 0.4473534 | MYADM     |
| cg14511156 | 0.2344914  | -189.2549 | -0.2581494 | 0.4926409 | OSCAR     |
| cg04995095 | 0.2664679  | -188.5495 | -0.2581788 | 0.5246466 | CD300E    |
| cg22083047 | 0.225532   | -190.1659 | -0.258356  | 0.483888  | PRICKLE2  |
| cg17741572 | 0.5385565  | -309.6386 | -0.2584832 | 0.7970396 | CFB       |
| cg08634024 | 0.5598983  | -339.0388 | -0.2585691 | 0.8184674 | OR2F1     |

|            |           |           |            |           |               |
|------------|-----------|-----------|------------|-----------|---------------|
| cg12850636 | 0.4564053 | -238.3383 | -0.2585711 | 0.7149763 | TJP3          |
| cg22549408 | 0.2388382 | -189.7599 | -0.2586423 | 0.4974805 | PMAIP1        |
| cg26884581 | 0.1387357 | -206.353  | -0.2586468 | 0.3973826 | PYGM          |
| cg17582777 | 0.3607234 | -200.5261 | -0.2586711 | 0.6193945 | EFNA3         |
| cg23704362 | 0.289257  | -190.1842 | -0.258697  | 0.547954  | C8orf46       |
| cg19292712 | 0.4715158 | -248.3047 | -0.2587235 | 0.7302393 | SPAM1         |
| cg17827767 | 0.556597  | -336.6873 | -0.2592106 | 0.8158076 | LRRC21        |
| cg26200585 | 0.3255991 | -195.0885 | -0.2593832 | 0.5849823 | PRX           |
| cg26628847 | 0.2452276 | -190.7034 | -0.2594376 | 0.5046653 | PIP           |
| cg10213812 | 0.6034673 | -350.9073 | -0.259544  | 0.8630112 | FOXN1         |
| cg09837803 | 0.2669092 | -190.7034 | -0.2595613 | 0.5264704 | IL16          |
| cg11161873 | 0.2757646 | -191.1971 | -0.2597373 | 0.535502  | FLJ39575      |
| cg10986043 | 0.2672952 | -191.0641 | -0.2597868 | 0.527082  | TCAP          |
| cg00563932 | 0.4470887 | -236.1465 | -0.259867  | 0.7069557 | PTGDS         |
| cg25477904 | 0.5480043 | -327.1228 | -0.2598901 | 0.8078945 | PSG1          |
| cg08996986 | 0.4181003 | -222.1913 | -0.2600261 | 0.6781263 | EPS8L1        |
| cg13552869 | 0.1378506 | -208.6094 | -0.2600383 | 0.3978889 | SEZ6L2        |
| cg14036856 | 0.3024036 | -193.6352 | -0.26018   | 0.5625836 | MGC5242<br>3  |
| cg01693350 | 0.2323849 | -192.4514 | -0.2601999 | 0.4925848 | WT1           |
| cg18988110 | 0.1998362 | -196.0225 | -0.2605063 | 0.4603425 | ATAD4         |
| cg01367992 | 0.32901   | -197.7417 | -0.2606158 | 0.5896258 | LY9           |
| cg10210238 | 0.193749  | -197.4047 | -0.2608596 | 0.4546087 | CDKN2B        |
| cg00226923 | 0.5026017 | -279.2088 | -0.2609124 | 0.7635141 | FGD2          |
| cg07947016 | 0.2209216 | -194.4345 | -0.260971  | 0.4818926 | KLK2          |
| cg18223379 | 0.2583263 | -192.8563 | -0.2609781 | 0.5193044 | BPIL3         |
| cg07441143 | 0.4283631 | -229.6539 | -0.2612724 | 0.6896355 | SLURP1        |
| cg00518911 | 0.2526055 | -193.4879 | -0.2613612 | 0.5139667 | HOXA10        |
| cg12061127 | 0.4072841 | -220.8238 | -0.2614806 | 0.6687647 | WFDC9         |
| cg08495878 | 0.6030308 | -350.9073 | -0.2615209 | 0.8645517 | SERPINA4      |
| cg05556717 | 0.3373571 | -200.8929 | -0.261593  | 0.5989501 | CCL26         |
| cg09343150 | 0.5133193 | -291.9315 | -0.2616369 | 0.7749562 | MEN1          |
| cg17829936 | 0.4237657 | -228.3717 | -0.2616762 | 0.6854419 | TAAR5         |
| cg15075718 | 0.3687111 | -208.3191 | -0.2617117 | 0.6304227 | MFRP          |
| cg13320683 | 0.4000895 | -219.3373 | -0.2621077 | 0.6621972 | RHOBTB1       |
| cg15422147 | 0.4263147 | -230.6227 | -0.2621389 | 0.6884536 | SERPINB5      |
| cg21453309 | 0.1714277 | -203.2531 | -0.2621888 | 0.4336165 | FAM101A       |
| cg07531356 | 0.3978758 | -219.5499 | -0.2626128 | 0.6604886 | INSL6         |
| cg03552103 | 0.3081545 | -198.3076 | -0.2626189 | 0.5707734 | 09-sep        |
| cg03548857 | 0.1984917 | -199.3213 | -0.2626268 | 0.4611185 | FFAR2         |
| cg25915982 | 0.513095  | -295.293  | -0.2627711 | 0.7758661 | GRB10         |
| cg05485062 | 0.513974  | -296.5872 | -0.2628806 | 0.7768545 | SERPINA1<br>2 |
| cg24824840 | 0.5268826 | -312.2926 | -0.2632264 | 0.790109  | SHANK1        |
| cg20512303 | 0.3579061 | -208.6279 | -0.2633603 | 0.6212664 | PDLIM4        |

|            |            |           |            |           |               |
|------------|------------|-----------|------------|-----------|---------------|
| cg15590780 | 0.233824   | -197.4047 | -0.2635162 | 0.4973402 | USH2A         |
| cg17192247 | 0.09382994 | -230.0359 | -0.2635514 | 0.3573814 | MAPRE3        |
| cg22341310 | 0.1657372  | -206.521  | -0.2635964 | 0.4293335 | ZNF541        |
| cg23753610 | 0.6664256  | -350.9073 | -0.2637647 | 0.9301904 | DNAHL1        |
| cg25141490 | 0.2393827  | -197.71   | -0.2638793 | 0.503262  | IL17B         |
| cg20551517 | 0.4952354  | -282.3838 | -0.2641943 | 0.7594296 | GIP           |
| cg01837574 | 0.2708502  | -198.3088 | -0.2643068 | 0.535157  | TRAPPC1       |
| cg03169180 | 0.3606009  | -211.3846 | -0.2644311 | 0.625032  | NLGN2         |
| cg24429836 | 0.1954286  | -202.4436 | -0.2644334 | 0.459862  | LDHD          |
| cg05700681 | 0.5259196  | -316.638  | -0.2647829 | 0.7907025 | CCL22         |
| cg23213217 | 0.2930357  | -200.76   | -0.2649889 | 0.5580245 | DEGS1         |
| cg17217677 | 0.3815378  | -218.7594 | -0.2650148 | 0.6465526 | SMPD3         |
| cg07676849 | 0.3204142  | -204.5151 | -0.265243  | 0.5856572 | FOLR3         |
| cg08390209 | 0.3203076  | -204.7271 | -0.2653783 | 0.5856858 | CDKN2B        |
| cg10779183 | 0.4766884  | -270.5448 | -0.2654925 | 0.7421809 | ELA3A         |
| cg13928961 | 0.4358717  | -244.377  | -0.2659131 | 0.7017848 | K6IRS3        |
| cg24628744 | 0.1378379  | -217.5831 | -0.2662339 | 0.4040718 | H2AFY         |
| cg18121684 | 0.4135907  | -234.5535 | -0.2665099 | 0.6801006 | SERPINB1<br>3 |
| cg02694395 | 0.2781877  | -202.3479 | -0.2665676 | 0.5447552 | FMO4          |
| cg24697329 | 0.4728671  | -270.9779 | -0.2667126 | 0.7395797 | ARHGEF4       |
| cg17240454 | 0.5331618  | -333.1444 | -0.2667997 | 0.7999614 | SPDEF         |
| cg24541550 | 0.3065735  | -205.3957 | -0.2668507 | 0.5734241 | MRVI1         |
| cg26422060 | 0.5188669  | -316.644  | -0.2671747 | 0.7860416 | TBX10         |
| cg24888049 | 0.1907402  | -207.271  | -0.2671783 | 0.4579185 | FES           |
| cg06818777 | 0.08895681 | -238.2824 | -0.267732  | 0.3566888 | CHAD          |
| cg21402035 | 0.334361   | -211.7441 | -0.2678427 | 0.6022036 | GALR3         |
| cg03782453 | 0.1165178  | -226.9843 | -0.2678651 | 0.3843829 | FLJ90575      |
| cg21277505 | 0.5612375  | -350.9073 | -0.2678931 | 0.8291306 | LOC28436<br>1 |
| cg17398613 | 0.4865465  | -286.4203 | -0.2681081 | 0.7546546 | SLC37A1       |
| cg06539449 | 0.4711343  | -273.7114 | -0.2681649 | 0.7392992 | CCND1         |
| cg25882366 | 0.1160158  | -227.9531 | -0.2683914 | 0.3844072 | HOXB2         |
| cg26473272 | 0.5988919  | -350.9073 | -0.2684971 | 0.867389  | SYT8          |
| cg25013053 | 0.4285365  | -246.9893 | -0.2686563 | 0.6971928 | UNC45B        |
| cg23776892 | 0.5078627  | -309.7513 | -0.2688099 | 0.7766726 | MAGEA1        |
| cg04132607 | 0.5901555  | -350.9073 | -0.2689689 | 0.8591244 | GATA5         |
| cg01774645 | 0.4135061  | -240.1927 | -0.2690079 | 0.682514  | ARHGAP3<br>0  |
| cg00042156 | 0.3259746  | -212.8576 | -0.2693172 | 0.5952918 | MGC1629<br>1  |
| cg11435943 | 0.2498085  | -206.2636 | -0.2694061 | 0.5192146 | SERPINB1<br>2 |
| cg03343942 | 0.2672321  | -206.8345 | -0.2695731 | 0.5368052 | SLC39A5       |
| cg15095327 | 0.2963475  | -209.0736 | -0.2696416 | 0.5659891 | IL17RE        |

|            |            |           |            |           |           |
|------------|------------|-----------|------------|-----------|-----------|
| cg16242770 | 0.4924998  | -296.8693 | -0.2697211 | 0.7622209 | KRTAP17-1 |
| cg11161417 | 0.3938835  | -233.2629 | -0.2697487 | 0.6636322 | SPACA3    |
| cg01474260 | 0.3291576  | -214.4444 | -0.2698391 | 0.5989967 | CESK1     |
| cg24884084 | 0.1606845  | -216.9496 | -0.2698438 | 0.4305283 | SPRR1B    |
| cg09546307 | 0.4045425  | -237.9865 | -0.269854  | 0.6743965 | CLEC4D    |
| cg07967308 | 0.3594604  | -221.975  | -0.2699822 | 0.6294427 | ACP5      |
| cg15983538 | 0.4757426  | -282.9326 | -0.2700864 | 0.745829  | SEMA4A    |
| cg24309555 | 0.3562332  | -221.2866 | -0.2700927 | 0.6263258 | APOB      |
| cg18729973 | 0.4757217  | -282.9602 | -0.2701051 | 0.7458268 | TFF1      |
| cg21065959 | 0.3886691  | -231.9739 | -0.2701114 | 0.6587805 | LCE1E     |
| cg08859675 | 0.3603675  | -222.9049 | -0.2703235 | 0.6306909 | PDE4A     |
| cg07711097 | 0.3924531  | -234.3866 | -0.2705338 | 0.6629869 | GML       |
| cg00941549 | 0.3975407  | -236.4832 | -0.2705425 | 0.6680831 | AKAP4     |
| cg23278885 | 0.434485   | -255.1497 | -0.2706031 | 0.7050881 | TGM6      |
| cg14366490 | 0.3667573  | -225.7551 | -0.2708009 | 0.6375582 | TXNL6     |
| cg25778166 | 0.4535829  | -269.3168 | -0.2712753 | 0.7248582 | FMO3      |
| cg10414946 | 0.3594415  | -224.9848 | -0.2715178 | 0.6309593 | MS4A2     |
| cg04511534 | 0.4813157  | -292.7527 | -0.2717412 | 0.7530569 | GGT6      |
| cg10883352 | 0.4007869  | -240.7054 | -0.2718163 | 0.6726032 |           |
| cg18533225 | 0.4174205  | -248.7168 | -0.2718353 | 0.6892558 | KLHDC7B   |
| cg24919884 | 0.3856981  | -235.4985 | -0.27227   | 0.657968  | ARHGEF16  |
| cg17687962 | 0.4648553  | -280.8503 | -0.2724229 | 0.7372782 | KLK3      |
| cg13960126 | 0.368385   | -230.5021 | -0.2728426 | 0.6412276 | CRB3      |
| cg12732155 | 0.1881447  | -216.8309 | -0.2731358 | 0.4612805 | LAPTM5    |
| cg10125195 | 0.4172909  | -251.7899 | -0.2731489 | 0.6904398 | LACRT     |
| cg02595219 | 0.1900134  | -216.7686 | -0.2732689 | 0.4632823 | KCNE3     |
| cg11070419 | 0.2745329  | -213.8654 | -0.2734804 | 0.5480133 | C4BPA     |
| cg00134539 | 0.4360978  | -264.2132 | -0.2737508 | 0.7098486 | UBASH3A   |
| cg04048249 | 0.384017   | -238.1394 | -0.2737914 | 0.6578084 | APOC3     |
| cg11739626 | 0.4265621  | -258.5622 | -0.2737983 | 0.7003604 | AKT1S1    |
| cg12639234 | 0.2840528  | -215.2786 | -0.2738598 | 0.5579125 | NAT2      |
| cg06720660 | 0.3294073  | -222.1824 | -0.2739151 | 0.6033224 | RNASE6    |
| cg06275635 | 0.2848532  | -215.5817 | -0.2739894 | 0.5588427 | PGLYRP3   |
| cg20488657 | 0.4172121  | -254.0258 | -0.2740854 | 0.6912975 | TFF3      |
| cg02812142 | 0.3743053  | -235.2887 | -0.2741438 | 0.6484491 | ACMSD     |
| cg22970435 | 0.08460171 | -249.8455 | -0.2742497 | 0.3588514 | SPATS1    |
| cg04488758 | 0.3870915  | -240.8304 | -0.2744762 | 0.6615677 | USP44     |
| cg26946769 | 0.5061606  | -328.7866 | -0.2748719 | 0.7810324 | MAPK4     |
| cg23514672 | 0.5977372  | -350.9073 | -0.2749403 | 0.8726774 | FLJ32871  |
| cg03458191 | 0.4745395  | -296.6616 | -0.2750279 | 0.7495673 | SAA1      |
| cg08093398 | 0.3768441  | -238.2908 | -0.2751242 | 0.6519684 | PSF1      |
| cg18967533 | 0.2641532  | -216.2074 | -0.2751689 | 0.539322  | KLK6      |
| cg00622552 | 0.10388    | -243.1485 | -0.275536  | 0.379416  | ODF3L1    |
| cg11984608 | 0.5216067  | -350.9073 | -0.2756428 | 0.7972494 | CLDN16    |

|            |            |           |            |           |               |
|------------|------------|-----------|------------|-----------|---------------|
| cg15648315 | 0.4421554  | -273.3433 | -0.2757137 | 0.717869  | FLJ26443      |
| cg08815403 | 0.2989485  | -220.2943 | -0.2757356 | 0.5746841 | HSD17B13      |
| cg19717150 | 0.3915321  | -245.5676 | -0.2757633 | 0.6672953 | HNF4A         |
| cg01861509 | 0.4014234  | -250.4643 | -0.2759435 | 0.6773669 | SPOCK2        |
| cg10894512 | 0.3578964  | -233.8849 | -0.2760824 | 0.6339787 | ACTA2         |
| cg22983092 | 0.3195071  | -224.3412 | -0.2761265 | 0.5956336 | KRT25A        |
| cg04567009 | 0.3157751  | -224.0484 | -0.276333  | 0.5921081 | FCGR3B        |
| cg25141995 | 0.2440492  | -217.803  | -0.276367  | 0.5204162 | VDAC1         |
| cg25781162 | 0.4775761  | -303.8308 | -0.2764422 | 0.7540183 | ABCG5         |
| cg22194129 | 0.3127117  | -223.7945 | -0.2764867 | 0.5891984 | CLEC4C        |
| cg24355048 | 0.3605424  | -236.4261 | -0.2768982 | 0.6374406 | CTSG          |
| cg22937320 | 0.4303398  | -269.5462 | -0.2771883 | 0.7075281 | C9orf138      |
| cg25659818 | 0.2980646  | -223.1695 | -0.2773778 | 0.5754424 | CCL4          |
| cg18396533 | 0.1414724  | -233.3373 | -0.2774608 | 0.4189331 | DYDC1         |
| cg24816866 | 0.4696712  | -300.8889 | -0.2778392 | 0.7475104 | PARK2         |
| cg09448880 | 0.3608518  | -239.0637 | -0.2781216 | 0.6389734 | PGLYRP3       |
| cg06531741 | 0.2575415  | -221.2866 | -0.278283  | 0.5358245 | HTR3B         |
| cg16964535 | 0.6310327  | -350.9073 | -0.2784814 | 0.9095141 | DNAJC5G       |
| cg05985767 | 0.3912248  | -251.6893 | -0.278496  | 0.6697208 | ANPEP         |
| cg03973663 | 0.153354   | -231.8559 | -0.2784999 | 0.4318539 | LYN           |
| cg21639401 | 0.385033   | -249.9067 | -0.2789076 | 0.6639407 | FLJ31222      |
| cg04337944 | 0.1995128  | -224.8861 | -0.2791863 | 0.4786991 | FBLN1         |
| cg12593411 | 0.3497784  | -237.8651 | -0.2792007 | 0.6289791 | ANGPTL6       |
| cg03977657 | 0.5092642  | -349.6087 | -0.2795417 | 0.788806  | LAMB3         |
| cg17095731 | 0.3633249  | -243.0098 | -0.2795883 | 0.6429132 | LRP8          |
| cg00750606 | 0.2594471  | -224.3589 | -0.2800384 | 0.5394855 | CDA           |
| cg08603768 | 0.375769   | -249.2571 | -0.2803127 | 0.6560817 | WNT8A         |
| cg07977490 | 0.4084282  | -264.8641 | -0.2804015 | 0.6888297 | C16orf45      |
| cg07950803 | 0.2268164  | -224.8836 | -0.2804092 | 0.5072255 | CD1A          |
| cg10464775 | 0.3907923  | -256.2815 | -0.2805438 | 0.6713361 | LAMP1         |
| cg18881269 | 0.3636721  | -245.5676 | -0.2807167 | 0.6443889 | LEPREL2       |
| cg04810997 | 0.3906679  | -256.7471 | -0.2807678 | 0.6714357 | TAS2R60       |
| cg25033144 | 0.4518402  | -294.7061 | -0.2807961 | 0.7326362 | FLJ00060      |
| cg16462075 | 0.443949   | -288.8555 | -0.2808729 | 0.7248219 | MUC3B         |
| cg22228134 | 0.2999097  | -230.4126 | -0.2811397 | 0.5810493 | GZMH          |
| cg21970438 | 0.4764955  | -317.9115 | -0.281146  | 0.7576416 | TTLL2         |
| cg01663968 | 0.06192365 | -272.9997 | -0.2815939 | 0.3435176 | CTSZ          |
| cg06236276 | 0.4764246  | -319.6019 | -0.2816781 | 0.7581028 | SLC22A2       |
| cg15782391 | 0.286655   | -229.9919 | -0.2819036 | 0.5685586 | ACPT          |
| cg25072962 | 0.3431043  | -242.1157 | -0.2822299 | 0.6253342 | MGC3529<br>5  |
| cg00436603 | 0.2662222  | -228.901  | -0.2823767 | 0.5485989 | CYP2E1        |
| cg17778867 | 0.3938404  | -262.5024 | -0.2825294 | 0.6763697 | KRTAP10-<br>8 |
| cg08341924 | 0.4757243  | -321.8601 | -0.282602  | 0.7583263 | TGM1          |

|            |            |           |            |           |          |
|------------|------------|-----------|------------|-----------|----------|
| cg20416179 | 0.5079787  | -350.9073 | -0.2826465 | 0.7906252 | C6orf71  |
| cg15542496 | 0.4455658  | -295.242  | -0.2826895 | 0.7282554 | PIP      |
| cg14034870 | 0.3010431  | -233.5574 | -0.282696  | 0.5837391 | SFTPG    |
| cg02423618 | 0.3086978  | -235.1442 | -0.2828187 | 0.5915165 | SPATA8   |
| cg01827098 | 0.5121537  | -350.9073 | -0.2829538 | 0.7951075 | GIMAP7   |
| cg03609102 | 0.2878989  | -232.8209 | -0.283333  | 0.5712318 | MUC5B    |
| cg27341860 | 0.6078755  | -350.9073 | -0.2835156 | 0.891391  | OR2L13   |
| cg05569220 | 0.2962744  | -235.5788 | -0.2841644 | 0.5804387 | FLJ44861 |
| cg09426307 | 0.3630635  | -253.4228 | -0.2843855 | 0.647449  | SEC14L3  |
| cg09948350 | 0.5106841  | -350.9073 | -0.2844241 | 0.7951082 | FLJ25084 |
| cg08402568 | 0.3698232  | -256.4083 | -0.2845365 | 0.6543597 | MGC34647 |
| cg12022621 | 0.2658202  | -233.4674 | -0.2849191 | 0.5507392 | LAX1     |
| cg18056600 | 0.07985406 | -268.5818 | -0.2850862 | 0.3649402 | ZMYND15  |
| cg24812523 | 0.3489266  | -250.0215 | -0.2851123 | 0.6340389 | AKAP6    |
| cg09736922 | 0.5059608  | -350.9073 | -0.2851549 | 0.7911158 | THPO     |
| cg07115820 | 0.2916379  | -237.154  | -0.2853677 | 0.5770056 | EPX      |
| cg15531099 | 0.2508093  | -233.5608 | -0.2854448 | 0.5362542 | LCE1D    |
| cg15516226 | 0.5125621  | -350.9073 | -0.2855768 | 0.7981389 | BTNL9    |
| cg01772980 | 0.337899   | -248.6564 | -0.2860718 | 0.6239709 | SCGB1D1  |
| cg15626350 | 0.1813291  | -238.5415 | -0.2861328 | 0.467462  | ESR1     |
| cg27020690 | 0.06695075 | -277.1617 | -0.2862431 | 0.3531938 | TERC     |
| cg15303841 | 0.3145589  | -243.6327 | -0.2865506 | 0.6011094 | RFPL1    |
| cg06303238 | 0.3656256  | -259.4737 | -0.286608  | 0.6522335 | SALL4    |
| cg16272420 | 0.434082   | -297.8051 | -0.2866294 | 0.7207115 | PNLIPRP2 |
| cg03003745 | 0.3034022  | -241.6061 | -0.2866748 | 0.590077  | UNQ473   |
| cg19384697 | 0.213723   | -236.4273 | -0.2868608 | 0.5005838 | UPK3B    |
| cg26415633 | 0.1807523  | -239.8395 | -0.2868636 | 0.4676159 | KLK1     |
| cg25020204 | 0.2908547  | -240.6405 | -0.2872721 | 0.5781268 | DBH      |
| cg27377450 | 0.519381   | -350.9073 | -0.2874269 | 0.8068079 | ARHGEF18 |
| cg10787197 | 0.2840677  | -240.321  | -0.287605  | 0.5716727 | C6orf105 |
| cg27566805 | 0.2023117  | -239.0446 | -0.2879267 | 0.4902384 | USH2A    |
| cg05440289 | 0.4664546  | -331.149  | -0.2882468 | 0.7547014 | IVL      |
| cg12069042 | 0.390556   | -275.2743 | -0.2884296 | 0.6789856 | PLXNB1   |
| cg00698688 | 0.5154736  | -350.9073 | -0.2885938 | 0.8040674 | SULT2B1  |
| cg21450627 | 0.5270273  | -350.9073 | -0.2886314 | 0.8156587 | PSD4     |
| cg25400358 | 0.2736227  | -241.99   | -0.2891822 | 0.5628049 | GPR137   |
| cg13180098 | 0.3527866  | -260.3751 | -0.2891924 | 0.641979  | RHO      |
| cg07922606 | 0.2056721  | -241.0495 | -0.2892842 | 0.4949563 | HIST1H3E |
| cg00626119 | 0.2474686  | -240.3404 | -0.2893179 | 0.5367865 | NTRK1    |
| cg05556202 | 0.4684285  | -337.7115 | -0.2895907 | 0.7580193 | TM4SF19  |
| cg08292050 | 0.4682191  | -337.9574 | -0.2897304 | 0.7579495 | SOCS4    |
| cg19859270 | 0.3931966  | -280.0113 | -0.289749  | 0.6829456 | GPR15    |
| cg10408410 | 0.4213305  | -297.4216 | -0.2897545 | 0.711085  | RLBP1    |
| cg01970325 | 0.2480747  | -241.3465 | -0.2898722 | 0.5379469 | NELF     |

|            |            |           |            |           |           |
|------------|------------|-----------|------------|-----------|-----------|
| cg03453449 | 0.3249093  | -253.28   | -0.2900088 | 0.6149181 | USP44     |
| cg09076584 | 0.3808365  | -274.5992 | -0.29014   | 0.6709765 | FLJ25006  |
| cg15711744 | 0.4723061  | -343.9573 | -0.2902173 | 0.7625234 | ANP32D    |
| cg22021786 | 0.4209023  | -299.2905 | -0.2905283 | 0.7114305 | WFDC8     |
| cg23444894 | 0.4522501  | -324.8721 | -0.2905403 | 0.7427903 | UNQ5810   |
| cg15743985 | 0.4140081  | -294.7374 | -0.2905859 | 0.704594  | CD22      |
| cg24027679 | 0.4853294  | -350.9073 | -0.2906345 | 0.7759639 | SLC2A7    |
| cg16626670 | 0.3552076  | -265.4209 | -0.2909985 | 0.6462061 | CLEC4G    |
| cg18129786 | 0.5188515  | -350.9073 | -0.2910156 | 0.8098671 | ZNF445    |
| cg23749046 | 0.4972081  | -350.9073 | -0.2910703 | 0.7882785 | GPR61     |
| cg10052840 | 0.2039926  | -244.3445 | -0.2911325 | 0.4951251 | SEMA6B    |
| cg02833725 | 0.3612347  | -268.2295 | -0.291162  | 0.6523967 | ISG20L2   |
| cg05912121 | 0.3687834  | -271.5685 | -0.2912189 | 0.6600023 | TH        |
| cg04143809 | 0.2804507  | -247.075  | -0.2914015 | 0.5718522 | FLJ39822  |
| cg01550148 | 0.2560095  | -244.6052 | -0.2914217 | 0.5474311 | H2AFY     |
| cg04574507 | 0.3574342  | -267.4485 | -0.2914923 | 0.6489264 | CD1B      |
| cg26661623 | 0.3419518  | -262.7482 | -0.2919578 | 0.6339096 | ASGR2     |
| cg04962134 | 0.3080791  | -253.178  | -0.291962  | 0.600041  | TRIM51    |
| cg19728577 | 0.4806361  | -350.9073 | -0.2923201 | 0.7729563 | GUCA2B    |
| cg27622610 | 0.2161805  | -245.7353 | -0.2923542 | 0.5085348 | OR1G1     |
| cg04968473 | 0.2654002  | -247.2142 | -0.2923996 | 0.5577998 | CYP1A2    |
| cg19033555 | 0.2939121  | -251.3253 | -0.2924768 | 0.5863889 | DEFB1     |
| cg01484156 | 0.2572935  | -247.3215 | -0.2928312 | 0.5501247 | NCALD     |
| cg21755709 | 0.1842031  | -249.3461 | -0.2928679 | 0.477071  | C21orf124 |
| cg26705561 | 0.2495855  | -246.9197 | -0.2928729 | 0.5424584 | SEC31L2   |
| cg13259290 | 0.4327754  | -315.3253 | -0.2929085 | 0.7256839 | CSF2      |
| cg04953015 | 0.420161   | -307.3509 | -0.2935182 | 0.7136792 | CHRNA2    |
|            |            |           |            |           | LOC11509  |
| cg17926869 | 0.4777485  | -350.9073 | -0.2935692 | 0.7713177 | 8         |
| cg25982743 | 0.1427233  | -259.6999 | -0.2942917 | 0.437015  | TIMP4     |
| cg19047670 | 0.374309   | -281.7563 | -0.2943565 | 0.6686655 | CCND1     |
| cg18508525 | 0.5172511  | -350.9073 | -0.2945014 | 0.8117525 | CD36      |
| cg18085517 | 0.2487947  | -250.1373 | -0.2946476 | 0.5434423 | TRPM1     |
| cg10071275 | 0.2858675  | -254.3104 | -0.2946731 | 0.5805405 | MYT1      |
| cg12775613 | 0.3344328  | -266.5016 | -0.2947753 | 0.6292081 | HTR1F     |
| cg16504670 | 0.4103634  | -304.5279 | -0.2949947 | 0.7053581 | FLJ20186  |
| cg09467501 | 0.07688189 | -285.8539 | -0.2952313 | 0.3721131 | PYY       |
| cg20011352 | 0.05912001 | -295.6634 | -0.2953026 | 0.3544226 | GPR124    |
| cg12113132 | 0.252102   | -251.9261 | -0.2954866 | 0.5475886 | CCNDBP1   |
| cg14287742 | 0.4542493  | -343.1444 | -0.2955471 | 0.7497964 | BLZF1     |
| cg11158374 | 0.4094526  | -305.6733 | -0.2956172 | 0.7050698 | TFF2      |
| cg18138484 | 0.5300097  | -350.9073 | -0.2958149 | 0.8258247 | CABP2     |
| cg27117399 | 0.2985212  | -259.9629 | -0.2962587 | 0.5947799 | CNDP1     |
| cg12951282 | 0.3137093  | -264.6352 | -0.2967355 | 0.6104448 | ASGR2     |
| cg02717866 | 0.3545996  | -278.813  | -0.2968399 | 0.6514395 | FLJ32771  |



|            |            |           |            |           |               |
|------------|------------|-----------|------------|-----------|---------------|
| cg12456510 | 0.382686   | -292.5274 | -0.2968769 | 0.6795629 | TFF2          |
| cg01530101 | 0.3310097  | -270.3274 | -0.2969737 | 0.6279835 | KCNQ1DN       |
| cg16051685 | 0.4380363  | -333.0358 | -0.2971882 | 0.7352245 | TRIM63        |
| cg24363955 | 0.4883226  | -350.9073 | -0.2972429 | 0.7855654 | FLJ14054      |
| cg12351042 | 0.3505441  | -278.696  | -0.2974981 | 0.6480422 | OR2B2         |
| cg13694749 | 0.3869657  | -296.7716 | -0.2975917 | 0.6845574 | SCN4A         |
| cg15842430 | 0.3302141  | -271.5305 | -0.297644  | 0.627858  | FAM12B        |
| cg08970446 | 0.5236402  | -350.9073 | -0.2989486 | 0.8225887 | SLC1A7        |
| cg03468463 | 0.3467314  | -280.8425 | -0.2990698 | 0.6458012 | SERPINB1<br>2 |
| cg01015871 | 0.3175783  | -270.9826 | -0.2991636 | 0.6167418 | MT4           |
| cg13656062 | 0.4526428  | -350.9073 | -0.2994549 | 0.7520977 | CYP4F2        |
| cg13578652 | 0.3355313  | -277.8089 | -0.2995983 | 0.6351296 | UBASH3A       |
| cg27418851 | 0.3594388  | -288.0722 | -0.2997716 | 0.6592104 | MBL2          |
| cg24607398 | 0.2219442  | -259.2102 | -0.2998751 | 0.5218193 | MLH1          |
| cg16986846 | 0.2925137  | -266.4167 | -0.299958  | 0.5924717 | SCGB2A1       |
| cg08244028 | 0.3530317  | -285.7881 | -0.3000245 | 0.6530562 | MSH3          |
| cg12781568 | 0.2568875  | -261.1892 | -0.3000795 | 0.556967  | WT1           |
| cg21432842 | 0.2381101  | -260.0525 | -0.3001772 | 0.5382873 | CSF3          |
| cg01053621 | 0.2676869  | -262.8608 | -0.3002947 | 0.5679817 | APOA2         |
| cg07408456 | 0.3061845  | -270.7377 | -0.3004782 | 0.6066627 | PGLYRP2       |
| cg26581729 | 0.1521072  | -267.996  | -0.3005201 | 0.4526273 | NPDC1         |
| cg12970081 | 0.2746971  | -265.313  | -0.3010011 | 0.5756982 | GPR32         |
| cg02844051 | 0.4350179  | -343.1784 | -0.3012167 | 0.7362346 | ZD52F10       |
| cg19111262 | 0.2222512  | -262.6631 | -0.3017299 | 0.5239811 | IGSF9         |
| cg10322876 | 0.3216799  | -278.1111 | -0.3018012 | 0.6234811 | CYP2B6        |
| cg09748975 | 0.4408863  | -350.9073 | -0.3018464 | 0.7427327 | MSX1          |
| cg01785568 | 0.2484402  | -264.5965 | -0.3021875 | 0.5506277 | MSX1          |
| cg03364781 | 0.3789587  | -304.4191 | -0.3022035 | 0.6811622 | ALPK1         |
| cg07792737 | 0.5098905  | -350.9073 | -0.3024258 | 0.8123163 | NPIP          |
| cg20311730 | 0.3251326  | -281.828  | -0.3029417 | 0.6280743 | NALP10        |
| cg22510822 | 0.340349   | -289.7312 | -0.3038667 | 0.6442158 | OR1E2         |
| cg18063149 | 0.3862935  | -313.7604 | -0.3039673 | 0.6902608 | FMO3          |
| cg23881725 | 0.1256265  | -280.8073 | -0.3040572 | 0.4296838 | DLEC1         |
| cg27090216 | 0.05394081 | -312.9915 | -0.3041496 | 0.3580904 | TNFRSF10<br>C |
| cg10575735 | 0.29611    | -277.2615 | -0.3046739 | 0.6007839 | SSX4          |
| cg09299388 | 0.3922968  | -320.0313 | -0.3047906 | 0.6970874 | PGK2          |
| cg20891917 | 0.4176386  | -339.3335 | -0.3048395 | 0.7224781 | IFRD1         |
| cg24840099 | 0.2559622  | -270.7978 | -0.3049589 | 0.5609211 | MSX1          |
| cg22190114 | 0.4102363  | -334.2178 | -0.3051451 | 0.7153814 | NALP8         |
| cg00594952 | 0.259784   | -271.632  | -0.3051679 | 0.564952  | RIMS3         |
| cg24407065 | 0.4979711  | -350.9073 | -0.3052947 | 0.8032658 | BLZF1         |
| cg20189782 | 0.4040549  | -331.0451 | -0.305685  | 0.7097399 | MGC2712<br>1  |

|            |            |           |            |           |               |
|------------|------------|-----------|------------|-----------|---------------|
| cg07643942 | 0.2563702  | -272.4211 | -0.3057549 | 0.5621251 | LACRT         |
| cg14182690 | 0.484645   | -350.9073 | -0.3062514 | 0.7908964 | RUNX3         |
| cg14238120 | 0.4063127  | -334.9023 | -0.306387  | 0.7126997 | ELA3A         |
| cg07339138 | 0.2668455  | -275.3521 | -0.3065077 | 0.5733532 | CCDC13        |
| cg27235662 | 0.4503666  | -350.9073 | -0.3067638 | 0.7571304 | CLDN16        |
| cg24735489 | 0.3173786  | -288.8555 | -0.3071072 | 0.6244857 | CDSN          |
| cg27442349 | 0.3260117  | -292.1113 | -0.307193  | 0.6332046 | NFKBIB        |
| cg24851490 | 0.1967697  | -274.1461 | -0.3074771 | 0.5042468 | RNASE2        |
| cg25957124 | 0.2195763  | -273.8479 | -0.3076426 | 0.5272189 | DNAH3         |
| cg01726767 | 0.3106277  | -288.4838 | -0.3078944 | 0.6185221 | LALBA         |
| cg15210427 | 0.2066712  | -274.9658 | -0.3081611 | 0.5148324 | CST9L         |
| cg10569414 | 0.3812778  | -322.3452 | -0.308202  | 0.6894798 | C21orf121     |
| cg01074640 | 0.3383363  | -300.5196 | -0.3086507 | 0.6469871 | IFNA17        |
| cg10127415 | 0.21716    | -276.6231 | -0.3090895 | 0.5262495 | MAGEB6        |
| cg19481686 | 0.3207112  | -294.7374 | -0.3091382 | 0.6298494 | CDKN2B        |
| cg02324920 | 0.2160088  | -276.7488 | -0.3091651 | 0.5251739 | NEURL         |
| cg05215575 | 0.2558413  | -279.3724 | -0.3092026 | 0.5650438 | FLJ25410      |
| cg23829949 | 0.2722019  | -281.9062 | -0.3092216 | 0.5814235 | ZNF238        |
| cg14179628 | 0.3297285  | -298.3348 | -0.3092244 | 0.6389529 | TCEAL7        |
| cg05636175 | 0.1209033  | -291.1786 | -0.3092464 | 0.4301497 | TNFRSF10<br>C |
| cg02130905 | 0.2974809  | -287.8697 | -0.3093105 | 0.6067913 | STMN4         |
| cg24852661 | 0.08091807 | -307.811  | -0.3098652 | 0.3907833 | GOLPH2        |
| cg01982597 | 0.37272    | -321.6963 | -0.309887  | 0.682607  | PGBD3         |
| cg08684473 | 0.4381951  | -350.9073 | -0.3101882 | 0.7483833 | LILRB5        |
| cg22784047 | 0.3764021  | -324.8721 | -0.3101959 | 0.6865979 | MVP           |
| cg09300114 | 0.1562128  | -284.6454 | -0.3105192 | 0.466732  | SLC16A5       |
| cg05670596 | 0.1772051  | -281.6657 | -0.310611  | 0.4878161 | CCRL2         |
| cg10677144 | 0.4005408  | -343.5021 | -0.3107069 | 0.7112477 | MYOM1         |
| cg22294577 | 0.4933836  | -350.9073 | -0.310992  | 0.8043756 | SLC26A3       |
| cg24992780 | 0.4875124  | -350.9073 | -0.3111588 | 0.7986712 | OR7C1         |
| cg05348870 | 0.4582027  | -350.9073 | -0.3111937 | 0.7693964 | TNFSF14       |
| cg16122592 | 0.3292902  | -303.1908 | -0.3112646 | 0.6405548 | MAGEB6        |
| cg02218324 | 0.3376594  | -309.5093 | -0.312322  | 0.6499814 | RSHL1         |
| cg07484827 | 0.1883708  | -283.8648 | -0.312383  | 0.5007538 | CHRNA10       |
| cg04457051 | 0.2923672  | -293.7453 | -0.3125455 | 0.6049128 | SCOC          |
| cg06501790 | 0.3554405  | -319.175  | -0.3126061 | 0.6680466 | SLC34A1       |
| cg25372195 | 0.3450688  | -314.8414 | -0.3130135 | 0.6580823 | DCD           |
| cg18242139 | 0.4002953  | -350.8403 | -0.3131154 | 0.7134107 | ELAVL4        |
| cg19910382 | 0.2821643  | -293.1941 | -0.3134445 | 0.5956088 | FABP1         |
| cg04505023 | 0.3862834  | -341.026  | -0.3134595 | 0.6997429 | SPRR1A        |
| cg27087809 | 0.4386388  | -350.9073 | -0.3135123 | 0.7521511 | ACSBG1        |
| cg19233472 | 0.4088135  | -350.9073 | -0.3135412 | 0.7223547 | FOXI1         |
| cg15480475 | 0.4080791  | -350.9073 | -0.3137013 | 0.7217804 | TUB           |
| cg01643624 | 0.4126795  | -350.9073 | -0.3139455 | 0.726625  | C11orf16      |

|            |           |           |            |           |           |
|------------|-----------|-----------|------------|-----------|-----------|
| cg24693053 | 0.1562141 | -291.3462 | -0.3141888 | 0.4704029 | MFSD7     |
| cg07597976 | 0.270934  | -292.7651 | -0.3143603 | 0.5852943 | CD19      |
| cg24901474 | 0.2372028 | -288.1036 | -0.3144175 | 0.5516204 | RGS5      |
| cg20576002 | 0.2941018 | -298.8212 | -0.3145735 | 0.6086753 | FAM112B   |
| cg01305625 | 0.2139752 | -287.5299 | -0.314688  | 0.5286632 | PDLIM4    |
| cg01894895 | 0.4634722 | -350.9073 | -0.3148311 | 0.7783033 | ANXA1     |
| cg02442161 | 0.4382539 | -350.9073 | -0.3148732 | 0.7531271 | PI3       |
| cg26583078 | 0.3460507 | -320.6961 | -0.3150533 | 0.6611041 | SORBS2    |
| cg04675937 | 0.3169513 | -307.9467 | -0.3151721 | 0.6321235 | CDKN2B    |
| cg05093686 | 0.1614378 | -292.3197 | -0.315203  | 0.4766409 | MAB21L1   |
| cg14911395 | 0.1556228 | -293.4158 | -0.3152861 | 0.4709089 | SEMA3B    |
| cg09037813 | 0.3432149 | -321.1516 | -0.3157725 | 0.6589874 | LRRFIP1   |
| cg11599505 | 0.4484804 | -350.9073 | -0.3165478 | 0.7650282 | C20orf102 |
| cg26149550 | 0.4718102 | -350.9073 | -0.3167361 | 0.7885463 | KLK15     |
| cg07525077 | 0.2558504 | -298.0316 | -0.3180567 | 0.5739071 | RNASE3    |
| cg02351381 | 0.1452575 | -302.1096 | -0.318937  | 0.4641945 | C12orf34  |
| cg18979223 | 0.341326  | -329.5379 | -0.3192753 | 0.6606013 | CDKN2B    |
| cg19807685 | 0.3556733 | -339.429  | -0.3199378 | 0.6756111 | HSD17B2   |
| cg21686987 | 0.456027  | -350.9073 | -0.3204511 | 0.7764781 | CTRB1     |
| cg14662756 | 0.3240156 | -324.8897 | -0.3207222 | 0.6447378 | NPFF      |
| cg22264436 | 0.4260747 | -350.9073 | -0.3208181 | 0.7468928 | SOST      |
| cg23260026 | 0.1853075 | -300.6665 | -0.3210185 | 0.506326  | FSTL3     |
| cg02187357 | 0.3137384 | -321.7162 | -0.321206  | 0.6349444 | TBC1D22B  |
|            |           |           |            |           | LOC34289  |
| cg19917856 | 0.1916062 | -300.7784 | -0.3212496 | 0.5128558 | 7         |
| cg12513481 | 0.2384804 | -303.6669 | -0.3217821 | 0.5602626 | SCAP1     |
| cg06244417 | 0.4526562 | -350.9073 | -0.3221298 | 0.774786  | FCN1      |
| cg12619162 | 0.446428  | -350.9073 | -0.3221733 | 0.7686013 | FXYP4     |
|            |           |           |            |           | MGC1303   |
| cg15905124 | 0.4487759 | -350.9073 | -0.3224154 | 0.7711913 | 4         |
| cg27285599 | 0.4382556 | -350.9073 | -0.3233248 | 0.7615805 | FLJ13841  |
| cg07412254 | 0.3078325 | -325.5587 | -0.3236655 | 0.631498  | FLJ14816  |
| cg21372914 | 0.3902878 | -350.9073 | -0.3237403 | 0.7140282 | CLEC4M    |
| cg24750391 | 0.1652161 | -308.0969 | -0.3238201 | 0.4890362 | PON3      |
| cg18780284 | 0.3570322 | -350.9073 | -0.3243613 | 0.6813936 | SPRR1B    |
| cg10275770 | 0.1153637 | -320.4833 | -0.3246911 | 0.4400549 | ICAM2     |
| cg15996947 | 0.2923377 | -323.9796 | -0.3253069 | 0.6176445 | L2HGDH    |
| cg09414535 | 0.2780388 | -320.4035 | -0.3256594 | 0.6036983 | GRIP1     |
| cg26063872 | 0.3163746 | -335.3188 | -0.3260295 | 0.6424041 | DEFB123   |
| cg00321478 | 0.3302248 | -342.7138 | -0.3262721 | 0.6564969 | CRB1      |
| cg13019092 | 0.4061252 | -350.9073 | -0.3266533 | 0.7327785 | PDZK1     |
| cg06832950 | 0.4493194 | -350.9073 | -0.3266932 | 0.7760125 | SPG3A     |
| cg11719283 | 0.3315827 | -345.4343 | -0.3270141 | 0.6585968 | ZNF574    |
| cg06220755 | 0.290849  | -328.3398 | -0.3272671 | 0.618116  | RAI2      |
| cg25762706 | 0.2417464 | -316.6455 | -0.3274754 | 0.5692218 | STMN4     |

|            |           |           |            |           |          |
|------------|-----------|-----------|------------|-----------|----------|
| cg09701102 | 0.4253201 | -350.9073 | -0.3278017 | 0.7531219 | NDUFV1   |
| cg08972170 | 0.2285695 | -316.4248 | -0.3281359 | 0.5567054 | Ells1    |
| cg27257987 | 0.3188199 | -342.2245 | -0.328201  | 0.6470209 | PSG4     |
| cg19042947 | 0.3103563 | -338.7437 | -0.3283471 | 0.6387034 | SERPINA4 |
| cg19982860 | 0.3005309 | -336.1518 | -0.3289448 | 0.6294757 | IFNA21   |
| cg05444024 | 0.5208416 | -350.9073 | -0.3310073 | 0.8518489 | FUT6     |
| cg02157083 | 0.2985285 | -343.9606 | -0.3322863 | 0.6308148 | APOA5    |
| cg00334507 | 0.2916562 | -342.2193 | -0.3326467 | 0.6243029 | MVP      |
| cg09027725 | 0.2966346 | -344.336  | -0.3327345 | 0.6293691 | COX4I2   |
| cg04138756 | 0.4472772 | -350.9073 | -0.3333534 | 0.7806306 | SPRR3    |
| cg06811800 | 0.3417124 | -350.9073 | -0.3336121 | 0.6753246 | ATP4B    |
| cg13204181 | 0.2971395 | -348.0213 | -0.3340269 | 0.6311664 | GH1      |
| cg15780361 | 0.2165424 | -329.998  | -0.3348484 | 0.5513908 | ALS2CR11 |
| cg05766474 | 0.4834163 | -350.9073 | -0.3350658 | 0.818482  | CCL16    |
| cg01515887 | 0.3931991 | -350.9073 | -0.3355448 | 0.7287439 | SAA2     |
| cg13521229 | 0.2175145 | -331.7588 | -0.3356052 | 0.5531197 | JOSD2    |
| cg00756887 | 0.3492271 | -350.9073 | -0.3362339 | 0.685461  | PVRL4    |
| cg17820828 | 0.3882852 | -350.9073 | -0.3362552 | 0.7245404 | KCNQ1    |
| cg07651914 | 0.2355458 | -338.9721 | -0.3376731 | 0.5732188 | CLDN15   |
| cg13271951 | 0.1873381 | -335.3835 | -0.3379064 | 0.5252445 | FAM57B   |
| cg25203980 | 0.4709641 | -350.9073 | -0.3389154 | 0.8098795 | CENTB5   |
| cg17357062 | 0.4868338 | -350.9073 | -0.3389211 | 0.8257549 | FCN1     |
| cg07997737 | 0.2321734 | -344.0519 | -0.3401192 | 0.5722926 | NRTN     |
| cg14696820 | 0.2593903 | -350.9073 | -0.341559  | 0.6009493 | LCE1A    |
| cg04711324 | 0.2219131 | -349.6812 | -0.3431783 | 0.5650914 | RIT2     |
| cg14894144 | 0.1360703 | -350.9073 | -0.3433836 | 0.479454  | LAMA3    |
| cg25813714 | 0.4999365 | -350.9073 | -0.3436572 | 0.8435937 | CYP4F12  |
| cg10758292 | 0.4251256 | -350.9073 | -0.3447331 | 0.7698587 | DEFA1    |
| cg12334759 | 0.3526571 | -350.9073 | -0.3453131 | 0.6979702 | C19orf19 |
| cg06351503 | 0.3412167 | -350.9073 | -0.3454117 | 0.6866283 | RDBP     |
| cg16990174 | 0.2011383 | -350.9073 | -0.3463497 | 0.547488  | RYBP     |
| cg10990993 | 0.2521413 | -350.9073 | -0.3463918 | 0.5985331 | MLH1     |
| cg25214346 | 0.3076224 | -350.9073 | -0.3465436 | 0.654166  | NR1I3    |
| cg20373326 | 0.3340394 | -350.9073 | -0.3469601 | 0.6809996 | HSD17B2  |
| cg21457804 | 0.4035528 | -350.9073 | -0.3469617 | 0.7505146 | CT45-2   |
| cg01657380 | 0.3227317 | -350.9073 | -0.3471405 | 0.6698722 | NPFF     |
| cg17907567 | 0.2743388 | -350.9073 | -0.3474548 | 0.6217936 | HAMP     |
| cg24024214 | 0.4733439 | -350.9073 | -0.3482055 | 0.8215494 | BTNL8    |
| cg21948655 | 0.4506653 | -350.9073 | -0.3482083 | 0.7988736 | SMCP     |
| cg02067021 | 0.3393566 | -350.9073 | -0.3492232 | 0.6885798 | DNAJC5B  |
| cg12815142 | 0.3262381 | -350.9073 | -0.3498877 | 0.6761258 | SPAG7    |
| cg08448751 | 0.3101435 | -350.9073 | -0.3512988 | 0.6614423 | SEMA3G   |
| cg24670715 | 0.1467054 | -350.9073 | -0.3529376 | 0.4996431 | ANGPT2   |
| cg04323365 | 0.3906217 | -350.9073 | -0.3535424 | 0.744164  | GJB1     |
| cg25119415 | 0.3342555 | -350.9073 | -0.3536854 | 0.687941  | MNDA     |

|            |            |           |            |           |                |
|------------|------------|-----------|------------|-----------|----------------|
| cg03602500 | 0.3769889  | -350.9073 | -0.3537084 | 0.7306974 | FLJ00060       |
| cg19954000 | 0.1473954  | -350.9073 | -0.354591  | 0.5019863 | FGF1           |
| cg12489960 | 0.3134574  | -350.9073 | -0.3553901 | 0.6688474 | SGCB           |
| cg24490338 | 0.363713   | -350.9073 | -0.3561833 | 0.7198963 | TPM3           |
| cg15652212 | 0.3361337  | -350.9073 | -0.3572417 | 0.6933754 | FLJ90586       |
| cg03221619 | 0.1960138  | -350.9073 | -0.357278  | 0.5532917 | FCER2          |
| cg06123346 | 0.2612833  | -350.9073 | -0.3587117 | 0.6199951 | ATP4A          |
| cg23412777 | 0.2822225  | -350.9073 | -0.3602996 | 0.6425221 | PYGO1          |
| cg19712821 | 0.2062546  | -350.9073 | -0.3605439 | 0.5667985 | KSP37          |
| cg15928132 | 0.2460896  | -350.9073 | -0.3614774 | 0.607567  | CCKAR          |
| cg16772207 | 0.2586677  | -350.9073 | -0.3615642 | 0.620232  | MYT1           |
| cg07824742 | 0.3956579  | -350.9073 | -0.3634132 | 0.7590712 | DBH            |
| cg19949550 | 0.373367   | -350.9073 | -0.3654561 | 0.7388231 | ASB2           |
| cg06436504 | 0.303599   | -350.9073 | -0.3660417 | 0.6696407 | DOC1           |
| cg10805676 | 0.3468397  | -350.9073 | -0.3664854 | 0.7133251 | MRPL28         |
| cg16175263 | 0.1958683  | -350.9073 | -0.3670614 | 0.5629296 | TNFRSF10<br>C  |
| cg06101324 | 0.1277653  | -350.9073 | -0.3676583 | 0.4954236 | SPRR1A         |
| cg06639544 | 0.3696489  | -350.9073 | -0.3688664 | 0.7385153 | OR7A5          |
| cg06277657 | 0.1093963  | -350.9073 | -0.3701676 | 0.4795639 | DGKI           |
| cg10604646 | 0.1664207  | -350.9073 | -0.3707275 | 0.5371482 | RGS5           |
| cg20544605 | 0.2848389  | -350.9073 | -0.3728623 | 0.6577012 | SORBS2         |
| cg24694549 | 0.2671041  | -350.9073 | -0.3731966 | 0.6403007 | GRIP1          |
| cg26292028 | 0.3147417  | -350.9073 | -0.3752455 | 0.6899872 | FLJ37587       |
| cg14845091 | 0.2493326  | -350.9073 | -0.3753314 | 0.624664  | ADPRHL1        |
| cg08450982 | 0.2129434  | -350.9073 | -0.3757941 | 0.5887374 | NUMBL          |
| cg25221254 | 0.3504186  | -350.9073 | -0.3760255 | 0.7264441 | ASAH3          |
| cg15503752 | 0.3524603  | -350.9073 | -0.3772689 | 0.7297292 | ST6GALNA<br>C1 |
| cg05671018 | 0.3016568  | -350.9073 | -0.3777252 | 0.679382  | LYSMD2         |
| cg14256699 | 0.4805748  | -350.9073 | -0.3798139 | 0.8603887 | SOST           |
| cg10062065 | 0.277668   | -350.9073 | -0.3806831 | 0.6583511 | APEG1          |
| cg22575540 | 0.3748259  | -350.9073 | -0.3810335 | 0.7558594 | TRIM54         |
| cg18149207 | 0.3478193  | -350.9073 | -0.3855318 | 0.7333511 | RORC           |
| cg26672426 | 0.2359512  | -350.9073 | -0.3902738 | 0.626225  | PTGES          |
| cg19728223 | 0.1460859  | -350.9073 | -0.3922928 | 0.5383787 | KCNQ1          |
| cg06536578 | 0.2557892  | -350.9073 | -0.3943564 | 0.6501456 | JPH4           |
| cg14706739 | 0.2978938  | -350.9073 | -0.3946822 | 0.6925761 | EPB49          |
| cg08573687 | 0.2859719  | -350.9073 | -0.3947454 | 0.6807172 | TH             |
| cg08626653 | 0.3123756  | -350.9073 | -0.398624  | 0.7109996 | FLJ37538       |
| cg23815000 | 0.3259055  | -350.9073 | -0.4012898 | 0.7271953 | LCN1           |
| cg01335367 | 0.1206263  | -350.9073 | -0.4027246 | 0.5233509 | C12orf34       |
| cg20154346 | 0.2338742  | -350.9073 | -0.4041119 | 0.6379861 | RAI2           |
| cg26927807 | 0.2863748  | -350.9073 | -0.4072778 | 0.6936526 | BTBD2          |
| cg22374142 | 0.08883238 | -350.9073 | -0.4088441 | 0.4976765 | HSF4           |

|            |            |           |            |           |         |
|------------|------------|-----------|------------|-----------|---------|
| cg01103730 | 0.2857291  | -350.9073 | -0.4116412 | 0.6973703 | IL20    |
| cg14992108 | 0.3064805  | -350.9073 | -0.4137776 | 0.7202581 | SNTB1   |
| cg14204735 | 0.05182404 | -350.9073 | -0.4143216 | 0.4661456 | CYB561  |
| cg20334738 | 0.2340382  | -350.9073 | -0.4148436 | 0.6488818 | MAB21L2 |
| cg04144768 | 0.2630639  | -350.9073 | -0.416039  | 0.6791029 | DDC     |
| cg25856811 | 0.2807174  | -350.9073 | -0.4372394 | 0.7179568 | SPRR3   |
| cg13726507 | 0.3871346  | -350.9073 | -0.4412836 | 0.8284182 | CTAG2   |
| cg27619475 | 0.1054726  | -350.9073 | -0.4510135 | 0.5564861 | SLC16A5 |
| cg26164184 | 0.3474236  | -350.9073 | -0.4674916 | 0.8149152 | FCN2    |
| cg13021192 | 0.1025132  | -350.9073 | -0.4980029 | 0.6005161 | CTSZ    |
| cg16179125 | 0.1394228  | -350.9073 | -0.5037773 | 0.6432001 | CTSZ    |

**Supplementary table 8 – Probes differentially methylated between benign and malignant tumours**

| TargetID   | Malign.AVG_Beta | Malign.DiffScore | Malign.Delta Beta | Benign.AVG_Beta | SYMBOL    |
|------------|-----------------|------------------|-------------------|-----------------|-----------|
| cg15538820 | 0.4530806       | -349.7383        | -0.3560391        | 0.8091196       | OBP2B     |
| cg15481539 | 0.4360782       | -349.7383        | -0.3330745        | 0.7691528       | DEFA5     |
| cg20822628 | 0.5395295       | -349.7383        | -0.3137423        | 0.8532718       | GATA5     |
| cg05055150 | 0.415839        | -349.7383        | -0.2962189        | 0.7120579       | MAG       |
| cg05922591 | 0.4448559       | -349.7383        | -0.2940205        | 0.7388764       | LILRB4    |
| cg13928961 | 0.2845886       | -349.7383        | -0.2924294        | 0.5770181       | K6IRS3    |
| cg16155702 | 0.3981431       | -349.7383        | -0.2874181        | 0.6855612       | FGF21     |
| cg08424423 | 0.3511186       | -349.7383        | -0.2866129        | 0.6377315       | CDSN      |
| cg01144251 | 0.324304        | -349.7383        | -0.284581         | 0.608885        | KLK9      |
| cg20283107 | 0.242698        | -349.7383        | -0.2842894        | 0.5269874       | FAM91A1   |
| cg08459368 | 0.435635        | -349.7383        | -0.2836125        | 0.7192475       | SCGB2A1   |
| cg14942312 | 0.2825689       | -349.7383        | -0.2831784        | 0.5657473       | GPR119    |
| cg18790143 | 0.2997488       | -349.7383        | -0.2811847        | 0.5809335       | OTOS      |
| cg06270401 | 0.4288664       | -349.7383        | -0.2797524        | 0.7086188       | DYRK4     |
| cg06145357 | 0.3597003       | -349.7383        | -0.2782477        | 0.637948        | MAGEA8    |
| cg09542291 | 0.3586163       | -349.7383        | -0.2779242        | 0.6365405       | SMCP      |
| cg00727947 | 0.4717107       | -349.7383        | -0.2771084        | 0.7488191       | LILRA5    |
| cg04719766 | 0.3542481       | -349.7383        | -0.2751947        | 0.6294428       | KCNQ1     |
| cg05766474 | 0.337676        | -349.7383        | -0.2748767        | 0.6125528       | CCL16     |
| cg20095587 | 0.3152015       | -349.7383        | -0.2740147        | 0.5892162       | TREM2     |
| cg11154879 | 0.4521337       | -349.7383        | -0.2724403        | 0.724574        | C20orf151 |
| cg15589427 | 0.3151931       | -349.7383        | -0.2723064        | 0.5874994       | MUC4      |
| cg13916742 | 0.4317627       | -349.7383        | -0.2706729        | 0.7024356       | SCGB1D1   |
| cg08453096 | 0.381714        | -349.7383        | -0.2694039        | 0.651118        | ABCG5     |
| cg06325687 | 0.5240554       | -349.7383        | -0.2686477        | 0.7927031       | OPN1MW    |
| cg17264470 | 0.4252936       | -349.7383        | -0.2679611        | 0.6932546       | FGF21     |

|            |           |           |            |           |              |
|------------|-----------|-----------|------------|-----------|--------------|
| cg01442426 | 0.466824  | -349.7383 | -0.2674867 | 0.7343107 | XCR1         |
| cg04721098 | 0.378996  | -349.7383 | -0.2660427 | 0.6450387 | CACNG3       |
| cg25903122 | 0.4034972 | -349.7383 | -0.2651348 | 0.668632  | MGC2747      |
| cg07297178 | 0.3714801 | -349.7383 | -0.2646588 | 0.6361389 | CEACAM7      |
| cg04645843 | 0.3893785 | -349.7383 | -0.2640179 | 0.6533964 | DPCR1        |
| cg02737335 | 0.4061463 | -349.7383 | -0.2607353 | 0.6668816 | ARHGEF1<br>6 |
| cg05615150 | 0.3974414 | -349.7383 | -0.2607169 | 0.6581584 | ARPP-21      |
| cg06850526 | 0.3746495 | -349.7383 | -0.2598681 | 0.6345176 | MGC1552<br>3 |
| cg00078867 | 0.3143547 | -349.7383 | -0.2597524 | 0.5741071 | WAS          |
| cg21168884 | 0.4030654 | -349.7383 | -0.2590842 | 0.6621496 | C6orf122     |
| cg24841244 | 0.4134916 | -349.7383 | -0.2563933 | 0.6698849 | CD3D         |
| cg15210999 | 0.35205   | -349.7383 | -0.2548002 | 0.6068502 | DTNBP1       |
| cg18521925 | 0.510487  | -349.7383 | -0.2547985 | 0.7652855 | SLC22A16     |
| cg13603551 | 0.4619253 | -349.7383 | -0.2539879 | 0.7159132 | ABP1         |
| cg20050113 | 0.1920189 | -349.7383 | -0.2539599 | 0.4459788 | SLC9A2       |
| cg15379858 | 0.5172948 | -349.7383 | -0.2531638 | 0.7704585 | ChGn         |
| cg24777950 | 0.3926003 | -349.7383 | -0.2530188 | 0.6456191 | CTSG         |
| cg20649991 | 0.3407245 | -349.7383 | -0.2528833 | 0.5936078 | LILRB5       |
| cg04520391 | 0.4054843 | -349.7383 | -0.2516547 | 0.657139  | PRB2         |
| cg08970446 | 0.4016043 | -349.7383 | -0.2504309 | 0.6520352 | SLC1A7       |
| cg21457804 | 0.2417219 | -349.7383 | -0.2501009 | 0.4918227 | CT45-2       |
| cg05740244 | 0.2508841 | -349.7383 | -0.2477106 | 0.4985947 | LDHC         |
| cg14150666 | 0.4415726 | -349.7383 | -0.2472936 | 0.6888662 | IL8RB        |
| cg19304352 | 0.4199971 | -349.7383 | -0.2471404 | 0.6671375 | DEFA4        |
| cg10334928 | 0.5186656 | -349.7383 | -0.2469132 | 0.7655788 | STON2        |
| cg03886110 | 0.3517158 | -349.7383 | -0.2467308 | 0.5984465 | PECAM1       |
| cg05444024 | 0.3666006 | -349.7383 | -0.2456803 | 0.6122809 | FUT6         |
| cg00625425 | 0.1842059 | -349.7383 | -0.2456387 | 0.4298446 | ANKRD38      |
| cg01774645 | 0.2713733 | -349.7383 | -0.2451142 | 0.5164875 | ARHGAP3<br>0 |
| cg17298704 | 0.4519594 | -349.7383 | -0.2450196 | 0.696979  | CLDN18       |
| cg21505334 | 0.3557376 | -349.7383 | -0.244886  | 0.6006235 | CEACAM5      |
| cg00548060 | 0.410025  | -349.7383 | -0.2447128 | 0.6547378 | NPL          |
| cg27291231 | 0.3371188 | -349.7383 | -0.2445031 | 0.5816218 | SSNA1        |
| cg13453139 | 0.4159389 | -349.7383 | -0.2444932 | 0.6604321 | PIK3R5       |
| cg00603172 | 0.452023  | -349.7383 | -0.2434982 | 0.6955212 | BOK          |
| cg24310246 | 0.4841552 | -349.7383 | -0.2432622 | 0.7274174 | RAXL1        |
| cg17981339 | 0.4541289 | -349.7383 | -0.2430857 | 0.6972146 | SBEM         |
| cg16607065 | 0.4440067 | -349.7383 | -0.2429445 | 0.6869512 | TP73         |
| cg19764418 | 0.2432153 | -349.7383 | -0.2421881 | 0.4854034 | RYR2         |
| cg20485165 | 0.2828671 | -349.7383 | -0.2420703 | 0.5249375 | WFDC12       |
| cg22506059 | 0.5863695 | -349.7383 | -0.2420411 | 0.8284106 | CARD10       |
| cg16462075 | 0.2858849 | -349.7383 | -0.2408291 | 0.526714  | MUC3B        |

|            |           |           |            |           |               |
|------------|-----------|-----------|------------|-----------|---------------|
| cg10409560 | 0.4086342 | -349.7383 | -0.2408101 | 0.6494443 | FLJ23657      |
| cg15140807 | 0.3757119 | -349.7383 | -0.2402097 | 0.6159216 | FLJ31222      |
| cg09691574 | 0.4869934 | -349.7383 | -0.2395915 | 0.7265849 | MRGPRX<br>4   |
| cg23776892 | 0.3681794 | -349.7383 | -0.2394203 | 0.6075997 | MAGEA1        |
| cg22484793 | 0.3971853 | -349.7383 | -0.2381729 | 0.6353582 | TLR9          |
| cg12205591 | 0.336417  | -349.7383 | -0.2381542 | 0.5745711 | CRYAA         |
| cg09044738 | 0.5255961 | -349.7383 | -0.2378273 | 0.7634234 | FAM12A        |
| cg14284171 | 0.4649712 | -349.7383 | -0.2373047 | 0.7022759 | SSX4          |
| cg09076077 | 0.3754302 | -349.7383 | -0.2371517 | 0.6125819 | FLJ33860      |
| cg27157038 | 0.3870067 | -349.7383 | -0.2367619 | 0.6237686 | DNTT          |
| cg22679120 | 0.2827845 | -349.7383 | -0.2365012 | 0.5192857 | SNX8          |
| cg05246522 | 0.331798  | -349.7383 | -0.2360892 | 0.5678872 | KSR1          |
| cg10746737 | 0.3413668 | -349.7383 | -0.2359594 | 0.5773262 | HLA-<br>DRB5  |
| cg03712237 | 0.4411383 | -349.7383 | -0.2355894 | 0.6767277 | SSX2          |
| cg13861644 | 0.4133269 | -349.7383 | -0.2354456 | 0.6487724 | PIWIL1        |
| cg26306976 | 0.5653939 | -349.7383 | -0.235133  | 0.8005269 | ITGB1BP1      |
| cg15337006 | 0.3983825 | -349.7383 | -0.2348147 | 0.6331971 | ITGAM         |
| cg12061127 | 0.2759923 | -349.7383 | -0.233935  | 0.5099273 | WFDC9         |
| cg00466249 | 0.3795245 | -349.7383 | -0.2329377 | 0.6124622 | MGC1552<br>3  |
| cg11128808 | 0.4956025 | -349.7383 | -0.2327401 | 0.7283425 | CACNG6        |
| cg26862286 | 0.6194292 | -349.7383 | -0.2326031 | 0.8520324 | NCL           |
| cg26298099 | 0.5111067 | -349.7383 | -0.2325617 | 0.7436684 | ESRRB         |
| cg01718139 | 0.3616614 | -349.7383 | -0.2321473 | 0.5938087 | UNQ3033       |
| cg12650635 | 0.2440127 | -349.7383 | -0.2319266 | 0.4759393 | AQP2          |
| cg21399079 | 0.5492972 | -349.7383 | -0.2318422 | 0.7811394 | GPR45         |
| cg25866075 | 0.2677559 | -349.7383 | -0.2317846 | 0.4995404 | NALP12        |
| cg19537511 | 0.260428  | -349.7383 | -0.2316766 | 0.4921046 | ARHGEF1<br>5  |
| cg19845843 | 0.302144  | -349.7383 | -0.2310586 | 0.5332026 | CXorf20       |
| cg11346450 | 0.3565485 | -349.7383 | -0.2309327 | 0.5874811 | UGT1A3        |
| cg07506795 | 0.5561472 | -349.7383 | -0.2299617 | 0.7861089 | ZNF19         |
| cg26709720 | 0.3257397 | -349.7383 | -0.2294499 | 0.5551896 | B3GALT5       |
| cg18121684 | 0.2844862 | -349.7383 | -0.2279559 | 0.5124421 | SERPINB1<br>3 |
| cg18920397 | 0.3002461 | -349.7383 | -0.2273841 | 0.5276302 | LY9           |
| cg16512727 | 0.1761041 | -349.7383 | -0.2268255 | 0.4029295 | C12orf4       |
| cg15711744 | 0.3049476 | -349.7383 | -0.2267154 | 0.5316629 | ANP32D        |
| cg16545105 | 0.2804936 | -349.7383 | -0.2236802 | 0.5041739 | CRHBP         |
| cg03264414 | 0.5583675 | -349.7383 | -0.2230498 | 0.7814173 | PAEP          |
| cg17829936 | 0.2673488 | -349.7383 | -0.2218965 | 0.4892453 | TAAR5         |
| cg08477744 | 0.5888508 | -349.7383 | -0.2215217 | 0.8103725 | MFAP2         |
| cg05973262 | 0.2171488 | -349.7383 | -0.2203037 | 0.4374526 | NOTCH4        |



|            |           |           |            |           |               |
|------------|-----------|-----------|------------|-----------|---------------|
| cg20090497 | 0.2631778 | -349.7383 | -0.2195344 | 0.4827121 | TAS2R9        |
| cg24818418 | 0.6178559 | -349.7383 | -0.2141469 | 0.8320028 | EGF           |
| cg09207718 | 0.22655   | -349.7383 | -0.2124448 | 0.4389948 | CYP1A2        |
| cg18604842 | 0.6423548 | -349.7383 | -0.2106856 | 0.8530405 | FLJ36046      |
| cg16626670 | 0.2194524 | -349.7383 | -0.2104451 | 0.4298975 | CLEC4G        |
| cg21707816 | 0.2288848 | -349.7383 | -0.2087309 | 0.4376157 | ENDOGL1       |
| cg01015871 | 0.1881558 | -349.7383 | -0.2060439 | 0.3941997 | MT4           |
| cg22580353 | 0.1478067 | -349.7383 | -0.2012693 | 0.3490759 | PVR           |
| cg17907567 | 0.1588891 | -349.7383 | -0.2012304 | 0.3601196 | HAMP          |
| cg19787037 | 0.1942855 | -349.7383 | -0.201064  | 0.3953495 | SPAG11        |
| cg04740359 | 0.1738479 | -349.7383 | -0.2010541 | 0.374902  | NTF3          |
| cg24678320 | 0.6430327 | -349.5606 | -0.2038725 | 0.8469052 | FLJ38451      |
| cg21434954 | 0.3879972 | -348.8308 | -0.2321814 | 0.6201785 | LCE1B         |
| cg02989940 | 0.2647014 | -348.2069 | -0.2163252 | 0.4810266 | ERAF          |
| cg18986165 | 0.4912712 | -347.9269 | -0.2296647 | 0.7209359 | SIGLEC12      |
| cg04891836 | 0.2747343 | -347.4762 | -0.2181711 | 0.4929054 | TNFSF14       |
| cg03055440 | 0.3544769 | -344.641  | -0.2286599 | 0.5831368 | MS4A6A        |
| cg00057593 | 0.2399878 | -344.3014 | -0.2093579 | 0.4493457 | GML           |
| cg21518208 | 0.2945707 | -343.7306 | -0.2206734 | 0.515244  | KRTHB5        |
| cg14902389 | 0.3972699 | -342.5865 | -0.2305449 | 0.6278148 | MGAT4A        |
| cg22899145 | 0.6054332 | -342.4624 | -0.2108555 | 0.8162888 | OPN1LW        |
| cg15484375 | 0.3750719 | -341.3942 | -0.2291345 | 0.6042064 | SAA1          |
| cg19623751 | 0.269946  | -341.3942 | -0.2153059 | 0.4852519 | CEACAM7       |
| cg12133004 | 0.4039559 | -341.3883 | -0.2303247 | 0.6342806 | C12orf54      |
| cg19831369 | 0.3097072 | -341.241  | -0.2222748 | 0.5319819 | HPS4          |
| cg03364781 | 0.2681359 | -340.8514 | -0.2147378 | 0.4828737 | ALPK1         |
| cg24857545 | 0.3572976 | -340.1646 | -0.2274397 | 0.5847373 | GDI1          |
| cg12456510 | 0.2358742 | -339.2136 | -0.2067161 | 0.4425902 | TFF2          |
| cg07126559 | 0.3519461 | -337.3503 | -0.2260688 | 0.5780149 | SGCG          |
| cg04816348 | 0.4607313 | -336.657  | -0.2281395 | 0.6888708 | CLEC4G        |
| cg15975283 | 0.4293278 | -335.5066 | -0.2286265 | 0.6579543 | SLC9A11       |
| cg02274362 | 0.5831261 | -333.8466 | -0.212859  | 0.7959852 | PNMA6A        |
| cg03386373 | 0.2626052 | -332.0456 | -0.210797  | 0.4734021 | SPATA3        |
| cg17170504 | 0.3303871 | -332.027  | -0.2220818 | 0.5524689 | HSPC065       |
| cg10370591 | 0.2568521 | -331.9665 | -0.2094974 | 0.4663496 | TPO           |
| cg23081213 | 0.3837045 | -330.4482 | -0.2260368 | 0.6097413 | PRKAG3        |
| cg21148892 | 0.3727474 | -330.3783 | -0.2253898 | 0.5981373 | CLEC4F        |
| cg14607011 | 0.5765337 | -329.7861 | -0.2128528 | 0.7893865 | C10orf12<br>5 |
| cg10503138 | 0.4134004 | -329.2079 | -0.2265394 | 0.6399398 | CNTN4         |
| cg01581111 | 0.429196  | -329.1739 | -0.2265616 | 0.6557575 | RBM18         |
| cg19859270 | 0.2742115 | -329.1666 | -0.2122381 | 0.4864496 | GPR15         |
| cg08996986 | 0.3119959 | -328.8183 | -0.2185786 | 0.5305745 | EPS8L1        |
| cg23131950 | 0.3497453 | -328.6273 | -0.2229941 | 0.5727394 | AP2S1         |
| cg21522797 | 0.5678004 | -327.1663 | -0.2135746 | 0.7813751 | PLCG2         |

|            |           |           |            |           |               |
|------------|-----------|-----------|------------|-----------|---------------|
| cg27513764 | 0.3042786 | -326.5733 | -0.216692  | 0.5209706 | EFCAB3        |
| cg08471713 | 0.4603995 | -325.2466 | -0.2244726 | 0.684872  | MEOX1         |
| cg13181284 | 0.5355783 | -324.9248 | -0.2177263 | 0.7533046 | KRT6B         |
| cg20312687 | 0.2909363 | -324.4077 | -0.2137966 | 0.504733  | DEFB118       |
| cg10784090 | 0.4992883 | -323.5112 | -0.2213007 | 0.720589  | CLDN18        |
| cg13733733 | 0.2635436 | -323.5112 | -0.2082248 | 0.4717684 | LILRA3        |
| cg16483466 | 0.4053316 | -323.2937 | -0.2244387 | 0.6297703 | C20orf18<br>6 |
| cg23587532 | 0.3188322 | -322.9373 | -0.2175964 | 0.5364285 | BM88          |
| cg06177698 | 0.2434229 | -322.8376 | -0.203427  | 0.4468499 | GABRQ         |
| cg04484789 | 0.4384841 | -321.3296 | -0.2238625 | 0.6623466 | KRT25B        |
| cg19561774 | 0.450701  | -321.3296 | -0.223549  | 0.67425   | SLC22A2       |
| cg09120035 | 0.3541225 | -321.3296 | -0.2209692 | 0.5750917 | CYP11B1       |
| cg06501790 | 0.2594283 | -321.1715 | -0.206564  | 0.4659923 | SLC34A1       |
| cg21307628 | 0.4280135 | -320.6594 | -0.2237497 | 0.6517632 | URB           |
| cg14333565 | 0.357435  | -319.9149 | -0.2207766 | 0.5782117 | NRTN          |
| cg15485859 | 0.4345184 | -319.4134 | -0.2232827 | 0.6578011 | C1orf116      |
| cg21130124 | 0.5627694 | -319.1251 | -0.2119399 | 0.7747093 | CALML5        |
| cg06094150 | 0.5004902 | -319.0854 | -0.2197497 | 0.72024   | MT1B          |
| cg16046376 | 0.2592078 | -317.2285 | -0.2052414 | 0.4644492 | PC            |
| cg02981853 | 0.5137917 | -316.7817 | -0.2177206 | 0.7315123 | ARHGEF1<br>8  |
| cg10129493 | 0.4263587 | -316.7741 | -0.2224665 | 0.6488252 | CD33          |
| cg03684977 | 0.4428008 | -316.5683 | -0.2221886 | 0.6649894 | GRB7          |
| cg21130374 | 0.258088  | -316.1543 | -0.2046324 | 0.4627204 | MX2           |
| cg10742801 | 0.2622358 | -315.1691 | -0.2052117 | 0.4674475 | PRAP1         |
| cg12514506 | 0.591264  | -313.3204 | -0.2051764 | 0.7964404 | OSBPL5        |
| cg20751395 | 0.5783061 | -313.1685 | -0.2075026 | 0.7858087 | KCNQ1         |
| cg08244028 | 0.2741447 | -312.8005 | -0.2068727 | 0.4810175 | MSH3          |
| cg18884741 | 0.5939192 | -311.8996 | -0.2042289 | 0.7981482 | RABGEF1       |
| cg03309967 | 0.2776801 | -311.5582 | -0.2071355 | 0.4848156 | PSENE1        |
| cg00953256 | 0.4207458 | -308.8552 | -0.2198225 | 0.6405683 | CCND1         |
| cg25221254 | 0.2509786 | -308.5319 | -0.2005752 | 0.4515538 | ASAH3         |
| cg24919884 | 0.3008333 | -307.7591 | -0.2099082 | 0.5107415 | ARHGEF1<br>6  |
| cg27606341 | 0.5621977 | -307.6039 | -0.2084707 | 0.7706684 | FYB           |
| cg21003606 | 0.5454174 | -307.2675 | -0.2108361 | 0.7562535 | CALN1         |
| cg08458487 | 0.5076604 | -306.413  | -0.2149904 | 0.7226508 | SFTPD         |
| cg11201288 | 0.4703562 | -306.0389 | -0.2176539 | 0.6880101 | SFRS11        |
| cg08475088 | 0.4432616 | -304.74   | -0.2182431 | 0.6615047 | NALP9         |
| cg26976437 | 0.317456  | -304.1469 | -0.2111019 | 0.528558  | LY6K          |
| cg10318258 | 0.4874021 | -300.7382 | -0.2148304 | 0.7022325 | RIPK3         |
| cg04837071 | 0.361176  | -300.2626 | -0.2144368 | 0.5756128 | NOXA1         |
| cg11783497 | 0.5443475 | -300.2606 | -0.2087535 | 0.753101  | IL1RN         |
| cg00075967 | 0.3638342 | -300.2089 | -0.2146123 | 0.5784466 | STRA6         |

|            |           |           |            |           |          |
|------------|-----------|-----------|------------|-----------|----------|
| cg12971694 | 0.3941404 | -299.7361 | -0.2161438 | 0.6102842 | CD72     |
| cg09750183 | 0.5904374 | -299.6744 | -0.2011615 | 0.7915989 | PGA5     |
| cg06952310 | 0.2969466 | -299.6476 | -0.2065254 | 0.5034719 | CSPG3    |
| cg04541607 | 0.5334575 | -298.9429 | -0.2097148 | 0.7431723 | CRYBB1   |
| cg04464446 | 0.573222  | -298.9429 | -0.2039574 | 0.7771794 | GAL      |
| cg03860768 | 0.3169232 | -297.5752 | -0.2087809 | 0.5257041 | BLK      |
| cg24765446 | 0.3430396 | -297.2302 | -0.2117408 | 0.5547804 | WFDC6    |
| cg15815843 | 0.5226995 | -296.9675 | -0.2103178 | 0.7330173 | MFAP5    |
| cg27050793 | 0.5784721 | -296.8872 | -0.2024092 | 0.7808813 | SBSN     |
| cg05564251 | 0.538348  | -295.4459 | -0.2079552 | 0.7463033 | SP140    |
| cg26014197 | 0.4038215 | -294.8189 | -0.2147328 | 0.6185544 | ZNF206   |
| cg15166089 | 0.4638107 | -292.4911 | -0.2133938 | 0.6772044 | CD164L2  |
| cg23580945 | 0.3838131 | -292.4297 | -0.2131484 | 0.5969615 | FLJ43826 |
| cg12582965 | 0.4902818 | -292.1792 | -0.2117196 | 0.7020013 | ATP10A   |
| cg17405586 | 0.330025  | -292.0819 | -0.2085265 | 0.5385516 | KRT1     |
| cg02818322 | 0.3541399 | -291.4603 | -0.2107684 | 0.5649083 | MAGEC3   |
| cg06403553 | 0.4874102 | -291.3066 | -0.2116207 | 0.6990309 | PGK2     |
| cg02022375 | 0.3740108 | -288.9755 | -0.2113789 | 0.5853897 | KRTAP1-1 |
| cg25177139 | 0.4601569 | -288.7032 | -0.2122241 | 0.672381  | SLC10A6  |
| cg05800321 | 0.5403467 | -288.3283 | -0.2053615 | 0.7457083 | LY6D     |
| cg13397379 | 0.2970143 | -287.9737 | -0.2025071 | 0.4995214 | OR2C3    |
| cg21495715 | 0.3301479 | -287.4554 | -0.2069093 | 0.5370572 | SLC5A10  |
| cg26813458 | 0.5464146 | -287.0046 | -0.2041164 | 0.750531  | CEACAM6  |
| cg13897627 | 0.4303222 | -286.9776 | -0.2122552 | 0.6425774 | FLJ44674 |
| cg22021786 | 0.3278267 | -285.2997 | -0.2058706 | 0.5336974 | WFDC8    |
| cg13601079 | 0.4812854 | -284.8631 | -0.209809  | 0.6910943 | SSX3     |
| cg22229142 | 0.4435449 | -284.459  | -0.2112188 | 0.6547636 | KCTD17   |
| cg27212977 | 0.52693   | -282.7381 | -0.2051004 | 0.7320303 | DEFA6    |
| cg06980460 | 0.4585793 | -282.3979 | -0.2100728 | 0.6686521 | FOLH1    |
| cg07093661 | 0.5329809 | -281.9774 | -0.2041374 | 0.7371182 | DHDH     |
| cg12417466 | 0.4518083 | -280.1945 | -0.2095094 | 0.6613178 | ARPP-21  |
| cg13446199 | 0.3121101 | -280.1945 | -0.2020141 | 0.5141242 | PSCA     |
| cg24908058 | 0.5238456 | -280.0073 | -0.2044961 | 0.7283417 | CGB5     |
| cg05348870 | 0.3242536 | -279.6946 | -0.2034317 | 0.5276853 | TNFSF14  |
| cg26149550 | 0.3630838 | -279.0892 | -0.2070817 | 0.5701655 | KLK15    |
| cg01309153 | 0.5129861 | -278.8297 | -0.2051974 | 0.7181835 | SURF1    |
| cg18809535 | 0.5157196 | -278.5172 | -0.2048227 | 0.7205423 | LDHAL6B  |
| cg25033144 | 0.3479971 | -278.1779 | -0.2054685 | 0.5534655 | FLJ00060 |
| cg27625732 | 0.5199867 | -277.7074 | -0.2041094 | 0.7240961 | TBC1D13  |
| cg15743985 | 0.3192534 | -277.6357 | -0.2020497 | 0.5213031 | CD22     |
| cg26093687 | 0.43224   | -277.6282 | -0.2089128 | 0.6411529 | EIF3S2   |
| cg26264314 | 0.377984  | -277.519  | -0.2074861 | 0.5854701 | NALP5    |
| cg06417962 | 0.3780621 | -277.2513 | -0.2073928 | 0.5854549 | RNH1     |
| cg08256781 | 0.4104481 | -277.225  | -0.2086169 | 0.619065  | ACSBG2   |
| cg00698688 | 0.3552629 | -276.338  | -0.2054297 | 0.5606926 | SULT2B1  |

|            |           |           |            |            |              |
|------------|-----------|-----------|------------|------------|--------------|
| cg11819637 | 0.3416641 | -275.642  | -0.2039127 | 0.5455768  | THPO         |
| cg19728577 | 0.3651664 | -275.483  | -0.2059037 | 0.5710701  | GUCA2B       |
| cg17741572 | 0.3925749 | -273.2783 | -0.2066652 | 0.5992401  | CFB          |
| cg13002506 | 0.4011521 | -273.1196 | -0.2069077 | 0.6080598  | GDPD4        |
| cg10612997 | 0.4086127 | -273.0855 | -0.2070847 | 0.6156974  | GREB1        |
| cg11884243 | 0.4263784 | -273.0281 | -0.2072618 | 0.6336402  | FCN2         |
| cg12432709 | 0.4298342 | -272.5995 | -0.2070925 | 0.6369268  | CCDC68       |
| cg14120879 | 0.4472553 | -271.1126 | -0.2063375 | 0.6535928  | DEFB105<br>A |
| cg02844051 | 0.3449644 | -270.7769 | -0.2024567 | 0.5474211  | ZD52F10      |
| cg11733245 | 0.4270356 | -270.5407 | -0.2063402 | 0.6333758  | IL2RA        |
| cg04431776 | 0.4440412 | -270.3004 | -0.2060949 | 0.6501361  | GAGE2        |
| cg10213812 | 0.4825747 | -270.269  | -0.2045394 | 0.6871142  | FOXN1        |
| cg01447817 | 0.4972509 | -268.024  | -0.2027074 | 0.6999583  | AQP12A       |
| cg21686987 | 0.3583098 | -267.3481 | -0.2023622 | 0.560672   | CTRB1        |
| cg08368934 | 0.3648643 | -264.7707 | -0.201911  | 0.5667753  | GPR97        |
| cg24579667 | 0.4706296 | -263.4147 | -0.2026892 | 0.6733188  | GPD2         |
| cg25548825 | 0.4999415 | -262.9417 | -0.200671  | 0.7006124  | TBX10        |
| cg01999333 | 0.3696276 | -259.8452 | -0.2004208 | 0.5700484  | CASP14       |
| cg21747271 | 0.3952332 | -257.6616 | -0.2009564 | 0.5961896  | AIP          |
| cg21094154 | 0.4152481 | -257.5285 | -0.2014309 | 0.616679   | TNFSF11      |
| cg01214847 | 0.4192866 | -257.3025 | -0.2013966 | 0.6206832  | TMPRSS3      |
| cg24027679 | 0.3988175 | -256.064  | -0.200469  | 0.5992865  | SLC2A7       |
| cg02806777 | 0.6353467 | 349.7383  | 0.2757326  | 0.3596141  | PGLYRP1      |
| cg18403361 | 0.6757336 | 349.7383  | 0.2671745  | 0.4085591  | CLEC14A      |
| cg18741908 | 0.5640532 | 349.7383  | 0.2612827  | 0.3027706  | GPR160       |
| cg22980351 | 0.5754073 | 349.7383  | 0.2394026  | 0.3360047  | WDR40B       |
| cg12556134 | 0.5137188 | 349.7383  | 0.2302909  | 0.2834279  | TGIF2        |
| cg20973210 | 0.4659333 | 349.7383  | 0.2237841  | 0.2421491  | C19orf35     |
| cg08831348 | 0.6368999 | 349.7383  | 0.2163504  | 0.4205496  | EML2         |
| cg22740835 | 0.6921056 | 349.7383  | 0.2149439  | 0.4771617  | DDR2         |
| cg18691434 | 0.2879029 | 349.7383  | 0.2135389  | 0.07436401 | GPC2         |
| cg15127733 | 0.6851814 | 349.7383  | 0.2134855  | 0.4716959  | HSPA12B      |
| cg18342279 | 0.4330666 | 349.7383  | 0.2104813  | 0.2225853  | ZAR1         |
| cg17200465 | 0.4617882 | 349.7383  | 0.2052948  | 0.2564934  | ENTPD3       |
| cg03096975 | 0.5436484 | 349.7383  | 0.2013325  | 0.3423159  | EML2         |
| cg25947945 | 0.5703273 | 349.7383  | 0.2006639  | 0.3696634  | LAD1         |

**Supplementary Table 9 – Gene ontology enrichment analysis of genes differentially methylated between benign and malignant tumours**

| GO biological | Homo sapiens | upload | upload_1 | upload_1 | upload_1 | upload_1 |
|---------------|--------------|--------|----------|----------|----------|----------|
|---------------|--------------|--------|----------|----------|----------|----------|

| process complete                         | - REFLIST<br>(20972) | _1<br>(257) | (expected) | (over/under) | (fold<br>Enrichment) | 1 (P-<br>value) |
|------------------------------------------|----------------------|-------------|------------|--------------|----------------------|-----------------|
| immune response<br>(GO:0006955)          | 1105                 | 33          | 13.54      | +            | 2.44                 | 2.06E-02        |
| defense response<br>(GO:0006952)         | 1236                 | 36          | 15.15      | +            | 2.38                 | 1.21E-02        |
| immune system<br>process<br>(GO:0002376) | 2013                 | 55          | 24.67      | +            | 2.23                 | 1.05E-04        |
| Unclassified<br>(UNCLASSIFIED)           | 4069                 | 29          | 49.86      | -            | 0.58                 | 0.00E+0<br>0    |

**Supplementary table 10. Probes differentially methylated between benign and malignant tumours within cluster A.**

| TargetID   | A_malignant.AVG_Beta | A_malignant.Diff Score | A_malignant.Delta Beta | A_benign.AVG_Beta | SYMBOL   |
|------------|----------------------|------------------------|------------------------|-------------------|----------|
| cg04675937 | 0.517006             | 350.6937               | 0.2000547              | 0.3169513         | CDKN2B   |
| cg01429391 | 0.6685527            | 350.6937               | 0.2116865              | 0.4568662         | MYH7     |
| cg07640473 | 0.4477181            | 350.6937               | 0.2127852              | 0.2349329         | SEMA3F   |
| cg22740835 | 0.6921056            | 350.6937               | 0.2144682              | 0.4776374         | DDR2     |
| cg10150813 | 0.5208944            | 350.6937               | 0.2155135              | 0.3053809         | KIAA0746 |
| cg04907257 | 0.5916469            | 350.6937               | 0.2173524              | 0.3742945         | ADCY2    |
| cg18691434 | 0.2879029            | 350.6937               | 0.2211446              | 0.06675828        | GPC2     |
| cg15679651 | 0.4293491            | 350.6937               | 0.2212728              | 0.2080763         | MAP4K1   |
| cg09748975 | 0.6639689            | 350.6937               | 0.2230826              | 0.4408863         | MSX1     |
| cg18342279 | 0.4330666            | 350.6937               | 0.2262887              | 0.2067779         | ZAR1     |
| cg15127733 | 0.6851814            | 350.6937               | 0.2267572              | 0.4584242         | HSPA12B  |
| cg09076584 | 0.6081214            | 350.6937               | 0.2272849              | 0.3808365         | FLJ25006 |
| cg13140267 | 0.3546688            | 350.6937               | 0.22782                | 0.1268488         | ASCC3L1  |
| cg25947945 | 0.5703273            | 350.6937               | 0.2324568              | 0.3378705         | LAD1     |
| cg22980351 | 0.5754073            | 350.6937               | 0.2376334              | 0.3377739         | WDR40B   |
| cg17200465 | 0.4617882            | 350.6937               | 0.2511543              | 0.2106339         | ENTPD3   |
| cg20973210 | 0.4659333            | 350.6937               | 0.2645214              | 0.2014118         | C19orf35 |
| cg18741908 | 0.5640532            | 350.6937               | 0.2756845              | 0.2883687         | GPR160   |
| cg02806777 | 0.6353467            | 350.6937               | 0.2779162              | 0.3574305         | PGLYRP1  |
| cg18403361 | 0.6757336            | 350.6937               | 0.3042796              | 0.371454          | CLEC14A  |

|            |           |           |            |           |              |
|------------|-----------|-----------|------------|-----------|--------------|
| cg12556134 | 0.5137188 | 350.6937  | 0.307425   | 0.2062938 | TGIF2        |
| cg24841244 | 0.4134916 | -224.3254 | -0.202677  | 0.6161686 | CD3D         |
| cg09076077 | 0.3754302 | -227.381  | -0.2034266 | 0.5788568 | FLJ3386<br>0 |
| cg21434954 | 0.3879972 | -228.1575 | -0.2041184 | 0.5921156 | LCE1B        |
| cg17298704 | 0.4519594 | -228.5838 | -0.2033729 | 0.6553323 | CLDN18       |
| cg20095587 | 0.3152015 | -230.1237 | -0.2003224 | 0.5155239 | TREM2        |
| cg16607065 | 0.4440067 | -230.8924 | -0.2046699 | 0.6486766 | TP73         |
| cg24579667 | 0.4706296 | -231.7224 | -0.2035277 | 0.6741573 | GPD2         |
| cg24777950 | 0.3926003 | -234.515  | -0.206831  | 0.5994313 | CTSG         |
| cg05246522 | 0.331798  | -235.1777 | -0.2040357 | 0.5358337 | KSR1         |
| cg27625732 | 0.5199867 | -237.0952 | -0.2008772 | 0.7208639 | TBC1D1<br>3  |
| cg05615150 | 0.3974414 | -237.8385 | -0.2082377 | 0.6056792 | ARPP-<br>21  |
| cg06094150 | 0.5004902 | -238.0364 | -0.2034292 | 0.7039195 | MT1B         |
| cg09835085 | 0.3697833 | -238.9034 | -0.207994  | 0.5777772 | KCNE4        |
| cg15484375 | 0.3750719 | -239.7562 | -0.2085393 | 0.5836112 | SAA1         |
| cg17264470 | 0.4252936 | -239.9491 | -0.2089126 | 0.6342062 | FGF21        |
| cg11201288 | 0.4703562 | -241.7993 | -0.2075065 | 0.6778627 | SFRS11       |
| cg23081213 | 0.3837045 | -252.0713 | -0.2136798 | 0.5973843 | PRKAG3       |
| cg14902389 | 0.3972699 | -253.4393 | -0.2144156 | 0.6116855 | MGAT4<br>A   |
| cg00603172 | 0.452023  | -253.4978 | -0.2131281 | 0.6651511 | BOK          |
| cg27063986 | 0.2507764 | -253.8432 | -0.200205  | 0.4509814 | NDST4        |
| cg00727947 | 0.4717107 | -256.4438 | -0.2129341 | 0.6846448 | LILRA5       |
| cg07388493 | 0.404849  | -257.0906 | -0.2158484 | 0.6206974 | NDUFS5       |
| cg26264314 | 0.377984  | -257.3989 | -0.2156184 | 0.5936025 | NALP5        |
| cg23131950 | 0.3497453 | -257.6297 | -0.2144027 | 0.564148  | AP2S1        |
| cg04837071 | 0.361176  | -259.7419 | -0.2158619 | 0.5770379 | NOXA1        |
| cg15975283 | 0.4293278 | -260.0525 | -0.2165903 | 0.6459181 | SLC9A1<br>1  |
| cg07506795 | 0.5561472 | -260.4547 | -0.2041111 | 0.7602583 | ZNF19        |
| cg00078867 | 0.3143547 | -260.7348 | -0.2125722 | 0.5269269 | WAS          |
| cg01309153 | 0.5129861 | -260.7825 | -0.2104546 | 0.7234406 | SURF1        |
| cg17981339 | 0.4541289 | -260.9011 | -0.215826  | 0.6699549 | SBEM         |
| cg22484793 | 0.3971853 | -262.4735 | -0.2179322 | 0.6151174 | TLR9         |
| cg08424423 | 0.3511186 | -265.0195 | -0.2173698 | 0.5684884 | CDSN         |
| cg10334928 | 0.5186656 | -265.0857 | -0.2112836 | 0.7299492 | STON2        |
| cg09871315 | 0.472488  | -265.0876 | -0.2161156 | 0.6886036 | HOXA2        |
| cg26306976 | 0.5653939 | -265.5616 | -0.2042983 | 0.7696922 | ITGB1B<br>P1 |
| cg18790143 | 0.2997488 | -267.7996 | -0.2135905 | 0.5133393 | OTOS         |
| cg10742801 | 0.2622358 | -268.4951 | -0.2080587 | 0.4702945 | PRAP1        |
| cg06952310 | 0.2969466 | -268.834  | -0.2136292 | 0.5105758 | CSPG3        |

|            |           |           |            |           |               |
|------------|-----------|-----------|------------|-----------|---------------|
| cg10784090 | 0.4992883 | -269.2437 | -0.215082  | 0.7143703 | CLDN18        |
| cg14607011 | 0.5765337 | -273.6078 | -0.2049018 | 0.7814355 | C10orf1<br>25 |
| cg04719766 | 0.3542481 | -274.264  | -0.2210779 | 0.575326  | KCNQ1         |
| cg04464446 | 0.573222  | -278.3966 | -0.20709   | 0.780312  | GAL           |
| cg03684977 | 0.4428008 | -278.3985 | -0.2228622 | 0.665663  | GRB7          |
| cg18087477 | 0.2709468 | -278.7548 | -0.2134567 | 0.4844035 | SYCP1         |
| cg16155702 | 0.3981431 | -281.3978 | -0.2250127 | 0.6231559 | FGF21         |
| cg09044738 | 0.5255961 | -286.2923 | -0.2176099 | 0.743206  | FAM12<br>A    |
| cg15379858 | 0.5172948 | -286.5752 | -0.2188576 | 0.7361524 | ChGn          |
| cg20782689 | 0.5919561 | -286.8934 | -0.2060337 | 0.7979898 | OXA1L         |
| cg02173484 | 0.2551284 | -287.7839 | -0.2139142 | 0.4690427 | GJA5          |
| cg09542291 | 0.3586163 | -289.4568 | -0.2269304 | 0.5855467 | SMCP          |
| cg22467567 | 0.2708923 | -292.6509 | -0.2185474 | 0.4894396 | IGFBP5        |
| cg08453096 | 0.381714  | -293.2885 | -0.2291326 | 0.6108466 | ABCG5         |
| cg07047653 | 0.5821059 | -294.1888 | -0.2103567 | 0.7924626 | AQP2          |
| cg22229142 | 0.4435449 | -294.419  | -0.228505  | 0.6720499 | KCTD17        |
| cg23587532 | 0.3188322 | -299.0298 | -0.2273598 | 0.5461919 | BM88          |
| cg20649991 | 0.3407245 | -299.9613 | -0.2296096 | 0.5703341 | LILRB5        |
| cg08477744 | 0.5888508 | -300.1096 | -0.2107619 | 0.7996127 | MFAP2         |
| cg23878206 | 0.6048216 | -300.123  | -0.207229  | 0.8120506 | ATF5          |
| cg26976437 | 0.317456  | -301.7808 | -0.2282211 | 0.5456772 | LY6K          |
| cg25903122 | 0.4034972 | -303.6787 | -0.2329513 | 0.6364485 | MGC27<br>47   |
| cg03264414 | 0.5583675 | -304.0731 | -0.2180388 | 0.7764063 | PAEP          |
| cg06270401 | 0.4288664 | -307.7151 | -0.2337492 | 0.6626156 | DYRK4         |
| cg17536532 | 0.225608  | -308.0916 | -0.2147324 | 0.4403405 | KIAA064<br>9  |
| cg02274362 | 0.5831261 | -309.3057 | -0.2147608 | 0.797887  | PNMA6<br>A    |
| cg13916742 | 0.4317627 | -310.9698 | -0.2347448 | 0.6665075 | SCGB1D<br>1   |
| cg04721098 | 0.378996  | -313.6501 | -0.2362232 | 0.6152191 | CACNG3        |
| cg26298099 | 0.5111067 | -315.6582 | -0.2291945 | 0.7403012 | ESRRB         |
| cg01442426 | 0.466824  | -315.6813 | -0.2340792 | 0.7009032 | XCR1          |
| cg19831369 | 0.3097072 | -317.3199 | -0.2328371 | 0.5425442 | HPS4          |
| cg06325687 | 0.5240554 | -317.717  | -0.2280164 | 0.7520718 | OPN1M<br>W    |
| cg02981853 | 0.5137917 | -327.3333 | -0.2324887 | 0.7462804 | ARHGEF<br>18  |
| cg24310246 | 0.4841552 | -332.0498 | -0.2376408 | 0.721796  | RAXL1         |
| cg04645843 | 0.3893785 | -335.3449 | -0.2436407 | 0.6330192 | DPCR1         |
| cg08459368 | 0.435635  | -335.3547 | -0.242586  | 0.678221  | SCGB2A<br>1   |

|            |           |           |            |           |               |
|------------|-----------|-----------|------------|-----------|---------------|
| cg13603551 | 0.4619253 | -344.2523 | -0.2435766 | 0.7055019 | ABP1          |
| cg16512727 | 0.1761041 | -345.6162 | -0.2129028 | 0.3890068 | C12orf4       |
| cg03198372 | 0.1881589 | -348.1959 | -0.2176657 | 0.4058246 | KREME<br>N1   |
| cg20283107 | 0.242698  | -348.3892 | -0.3082423 | 0.5509402 | FAM91<br>A1   |
| cg15538820 | 0.4530806 | -348.3892 | -0.3053188 | 0.7583994 | OBP2B         |
| cg15481539 | 0.4360782 | -348.3892 | -0.296026  | 0.7321042 | DEFA5         |
| cg06850526 | 0.3746495 | -348.3892 | -0.2896782 | 0.6643277 | MGC15<br>523  |
| cg05055150 | 0.415839  | -348.3892 | -0.2823841 | 0.6982231 | MAG           |
| cg20822628 | 0.5395295 | -348.3892 | -0.281748  | 0.8212775 | GATA5         |
| cg11154879 | 0.4521337 | -348.3892 | -0.2672881 | 0.7194219 | C20orf1<br>51 |
| cg06145357 | 0.3597003 | -348.3892 | -0.2649736 | 0.624674  | MAGEA<br>8    |
| cg00466249 | 0.3795245 | -348.3892 | -0.2647276 | 0.6442521 | MGC15<br>523  |
| cg21747271 | 0.3952332 | -348.3892 | -0.2574412 | 0.6526744 | AIP           |
| cg14942312 | 0.2825689 | -348.3892 | -0.2553415 | 0.5379104 | GPR119        |
| cg11783497 | 0.5443475 | -348.3892 | -0.2546123 | 0.7989599 | IL1RN         |
| cg01144251 | 0.324304  | -348.3892 | -0.2513844 | 0.5756884 | KLK9          |
| cg13453139 | 0.4159389 | -348.3892 | -0.2506206 | 0.6665596 | PIK3R5        |
| cg20050113 | 0.1920189 | -348.3892 | -0.2492462 | 0.4412651 | SLC9A2        |
| cg22679120 | 0.2827845 | -348.3892 | -0.2485805 | 0.531365  | SNX8          |
| cg05922591 | 0.4448559 | -348.3892 | -0.2482746 | 0.6931306 | LILRB4        |
| cg05740244 | 0.2508841 | -348.3892 | -0.2473995 | 0.4982836 | LDHC          |
| cg19764418 | 0.2432153 | -348.3892 | -0.2367249 | 0.4799402 | RYR2          |
| cg22506059 | 0.5863695 | -348.3892 | -0.2309128 | 0.8172823 | CARD10        |
| cg26862286 | 0.6194292 | -348.3892 | -0.221701  | 0.8411303 | NCL           |

**Supplementary table 11. Probes differentially methylated between *NF1*-mutated tumours and normal tissue**

| TargetID   | NF1.AVG_Beta | NF1.DiffScore | NF1.Delta Beta | normal.AVG_Beta | SYMBOL   |
|------------|--------------|---------------|----------------|-----------------|----------|
| cg09871315 | 0.6965898    | 348.7749      | 0.3912158      | 0.305374        | HOXA2    |
| cg24101578 | 0.6988041    | 348.7749      | 0.3590902      | 0.3397138       | CDH22    |
| cg16517394 | 0.5235299    | 348.7749      | 0.3187992      | 0.2047307       | TNFSF4   |
| cg14371590 | 0.6236935    | 348.7749      | 0.3119166      | 0.3117769       | SLC26A10 |
| cg15958424 | 0.574763     | 348.7749      | 0.3062523      | 0.2685107       | ACPP     |



|            |           |          |           |           |           |
|------------|-----------|----------|-----------|-----------|-----------|
| cg17686260 | 0.8032176 | 348.7749 | 0.3042283 | 0.4989893 | MGMT      |
| cg07285276 | 0.821921  | 348.7749 | 0.2998421 | 0.5220789 | RAPGEF1   |
| cg17339202 | 0.5737547 | 348.7749 | 0.2956863 | 0.2780684 | SYNC1     |
| cg03752628 | 0.5343904 | 348.7749 | 0.2929518 | 0.2414387 | PTGFRN    |
| cg19125606 | 0.6374627 | 348.7749 | 0.2884381 | 0.3490245 | AGT       |
| cg02506908 | 0.7068832 | 348.7749 | 0.2843943 | 0.4224889 | HPD       |
| cg07047653 | 0.8414207 | 348.7749 | 0.2832409 | 0.5581798 | AQP2      |
| cg01103836 | 0.9511703 | 348.7749 | 0.2762121 | 0.6749582 | MYO9B     |
| cg04802221 | 0.6943331 | 348.7749 | 0.2758361 | 0.418497  | LOC283849 |
| cg14409083 | 0.5139847 | 348.7749 | 0.2754085 | 0.2385762 | EMP1      |
| cg17890764 | 0.6807331 | 348.7749 | 0.2748784 | 0.4058547 | ITIH4     |
| cg07236190 | 0.7600912 | 348.7749 | 0.2744851 | 0.4856061 | AMDHD1    |
| cg17791651 | 0.5707121 | 348.7749 | 0.2729125 | 0.2977996 | POU3F1    |
| cg17105014 | 0.4479879 | 348.7749 | 0.2697038 | 0.1782841 | GYPC      |
| cg18702197 | 0.6343318 | 348.7749 | 0.2681271 | 0.3662047 | HOXD3     |
| cg17790333 | 0.7589638 | 348.7749 | 0.2663354 | 0.4926285 | CYP11A1   |
| cg03271907 | 0.8519585 | 348.7749 | 0.2633016 | 0.5886568 | MGMT      |
| cg11554605 | 0.7766601 | 348.7749 | 0.2588209 | 0.5178393 | ASB4      |
| cg24134767 | 0.6884218 | 348.7749 | 0.257864  | 0.4305578 | HTR3A     |
| cg12564453 | 0.7913745 | 348.7749 | 0.2577252 | 0.5336493 | CETP      |
| cg22740835 | 0.5705751 | 348.7749 | 0.2563796 | 0.3141955 | DDR2      |
| cg26668713 | 0.4026574 | 348.7749 | 0.2551222 | 0.1475352 | SIPA1     |
| cg08624249 | 0.7327272 | 348.7749 | 0.2536971 | 0.4790302 | KIAA0889  |

|            |           |          |           |           |          |
|------------|-----------|----------|-----------|-----------|----------|
| cg18172186 | 0.772864  | 348.7749 | 0.2523714 | 0.5204926 | KIAA1913 |
| cg24459563 | 0.7360434 | 348.7749 | 0.252001  | 0.4840423 | CACNG1   |
| cg02674804 | 0.8801907 | 348.7749 | 0.2506418 | 0.6295489 | REEP6    |
| cg10861599 | 0.5325695 | 348.7749 | 0.2505627 | 0.2820067 | TNFSF4   |
| cg04700814 | 0.5433615 | 348.7749 | 0.2492602 | 0.2941013 | HEXIM1   |
| cg13763232 | 0.7312835 | 348.7749 | 0.2482646 | 0.4830189 | SLC6A6   |
| cg06507244 | 0.693307  | 139.7493 | 0.2468265 | 0.4464805 | DHX32    |
| cg26069745 | 0.5589859 | 142.6299 | 0.2460915 | 0.3128945 | HOXA2    |
| cg11653858 | 0.7029867 | 135.9538 | 0.2425544 | 0.4604322 | SLC13A2  |
| cg15381313 | 0.6481272 | 131.1097 | 0.241303  | 0.4068242 | NR1H4    |
| cg12177001 | 0.7571451 | 136.8648 | 0.2364067 | 0.5207384 | IFI27    |
| cg27114026 | 0.7668031 | 139.7493 | 0.2360043 | 0.5307989 | ELA1     |
| cg26511075 | 0.8270028 | 348.7749 | 0.2335835 | 0.5934194 | FLJ25422 |
| cg05342835 | 0.6029424 | 119.0505 | 0.2304975 | 0.3724449 | SYNC1    |
| cg18392482 | 0.7740394 | 132.6677 | 0.2286714 | 0.545368  | AMDHD1   |
| cg22759185 | 0.7859135 | 133.0607 | 0.2266619 | 0.5592517 | REEP6    |
| cg16363586 | 0.5369419 | 118.0146 | 0.2253324 | 0.3116095 | BST2     |
| cg24928687 | 0.7552074 | 123.4717 | 0.2239569 | 0.5312504 | EPHX1    |
| cg17186803 | 0.4128042 | 135.1871 | 0.2174902 | 0.195314  | SCN4B    |
| cg23547429 | 0.4535924 | 121.8962 | 0.2166732 | 0.2369192 | SLC43A3  |
| cg16708623 | 0.5011004 | 105.1766 | 0.2103171 | 0.2907833 | TRIM2    |
| cg24315815 | 0.7337341 | 105.4593 | 0.2094976 | 0.5242364 | PLSCR4   |
| cg20289949 | 0.4467449 | 112.3488 | 0.2081347 | 0.2386102 | HAAO     |

|            |           |           |            |            |          |
|------------|-----------|-----------|------------|------------|----------|
| cg17129388 | 0.7558743 | 106.0773  | 0.206287   | 0.5495873  | NGFR     |
| cg05722906 | 0.3800062 | 129.9799  | 0.2062131  | 0.1737931  | CYP4F12  |
| cg19224278 | 0.5202059 | 97.37476  | 0.2053372  | 0.3148687  | ALDH1A3  |
| cg05253327 | 0.7560579 | 104.8994  | 0.2050145  | 0.5510435  | B3GNT1   |
| cg13185308 | 0.5971879 | 91.88846  | 0.2041935  | 0.3929945  | ABCC8    |
| cg10055471 | 0.9203848 | 348.7749  | 0.203947   | 0.7164378  | NROB2    |
| cg07572435 | 0.7755153 | 105.514   | 0.2015542  | 0.5739611  | LY6D     |
| cg05520656 | 0.2682838 | 348.7749  | 0.2015286  | 0.06675524 | ZNF681   |
| cg07251788 | 0.6877667 | 91.65414  | 0.2004234  | 0.4873433  | CLTCL1   |
| cg05256043 | 0.5875705 | 88.35542  | 0.2003055  | 0.387265   | DCT      |
| cg08858521 | 0.419414  | 108.8849  | 0.2002969  | 0.219117   | WFIKKN1  |
| cg18462653 | 0.2046788 | -99.3614  | -0.2000436 | 0.4047224  | DEFB119  |
| cg04511534 | 0.5530116 | -113.0998 | -0.2000453 | 0.7530569  | GGT6     |
| cg26349773 | 0.5451245 | -110.8726 | -0.2000477 | 0.7451722  | ATP6V0A4 |
| cg26369642 | 0.5754656 | -120.4023 | -0.2000616 | 0.7755272  | C8orf72  |
| cg24898863 | 0.1876777 | -102.5606 | -0.2000736 | 0.3877513  | S100A8   |
| cg05484458 | 0.5150857 | -103.7888 | -0.2001956 | 0.7152812  | GNB3     |
| cg05206661 | 0.3242608 | -88.45398 | -0.200295  | 0.5245558  | FLJ33534 |
| cg15501381 | 0.3508636 | -88.16765 | -0.2003096 | 0.5511732  | NGB      |
| cg08256781 | 0.4856607 | -98.5591  | -0.2004132 | 0.686074   | ACSBG2   |
| cg01040850 | 0.331816  | -88.42261 | -0.2004334 | 0.5322494  | MR1      |
| cg21484834 | 0.6270109 | -144.5686 | -0.2004467 | 0.8274575  | PTK6     |
| cg06747888 | 0.1962691 | -101.2652 | -0.2004661 | 0.3967353  | TBR1     |

|            |           |           |            |           |          |
|------------|-----------|-----------|------------|-----------|----------|
| cg11360149 | 0.7100705 | -217.178  | -0.2005354 | 0.9106058 | OR2V2    |
| cg20781967 | 0.2357472 | -95.2805  | -0.2006543 | 0.4364015 | NINJ2    |
| cg16907566 | 0.1751612 | -105.8329 | -0.2007073 | 0.3758685 | COL14A1  |
| cg07897701 | 0.5365517 | -109.4775 | -0.2007174 | 0.7372691 | ABP1     |
| cg01138020 | 0.3576904 | -88.63487 | -0.2007815 | 0.5584719 | MGC29671 |
| cg26224139 | 0.6117709 | -137.1084 | -0.2008127 | 0.8125836 | C9orf116 |
| cg05546044 | 0.3579872 | -88.66652 | -0.200815  | 0.5588021 | MAPK1    |
| cg21969640 | 0.3132668 | -89.3176  | -0.2008801 | 0.5141469 | GPR84    |
| cg16466334 | 0.4554137 | -94.87328 | -0.2009417 | 0.6563554 | MMP3     |
| cg26333641 | 0.5060081 | -102.8653 | -0.2009747 | 0.7069829 | IL22     |
| cg02787991 | 0.0700649 | -144.7541 | -0.2010344 | 0.2710993 | SECTM1   |
| cg26240939 | 0.4713672 | -97.08132 | -0.2010376 | 0.6724048 | LOC57149 |
| cg00168942 | 0.327907  | -89.05566 | -0.2010531 | 0.5289601 | CX40.1   |
| cg20234959 | 0.4359946 | -93.18576 | -0.2013246 | 0.6373192 | NID1     |
| cg26813458 | 0.6637015 | -171.4334 | -0.2013559 | 0.8650575 | CEACAM6  |
| cg11380128 | 0.532186  | -109.2137 | -0.2013685 | 0.7335544 | PRLH     |
| cg03684977 | 0.5149417 | -105.2634 | -0.2014165 | 0.7163582 | GRB7     |
| cg05989054 | 0.4889322 | -100.2788 | -0.2014321 | 0.6903643 | GAMT     |
| cg27547703 | 0.4964206 | -101.7262 | -0.2015464 | 0.6979669 | TDRD1    |
| cg14519000 | 0.6751508 | -181.9228 | -0.2015958 | 0.8767466 | GATA5    |
| cg24101873 | 0.5796713 | -124.4089 | -0.201674  | 0.7813454 | C20orf70 |
| cg06293195 | 0.5043284 | -103.5185 | -0.2017943 | 0.7061228 | TXN2     |
| cg20104776 | 0.3647183 | -89.69584 | -0.2017973 | 0.5665156 | LDOC1    |

|            |            |           |            |           |           |
|------------|------------|-----------|------------|-----------|-----------|
| cg23413307 | 0.4422694  | -94.39011 | -0.2018763 | 0.6441457 | LCE1F     |
| cg24010336 | 0.2248199  | -97.93326 | -0.201922  | 0.4267419 | FBXO17    |
| cg17348429 | 0.5850792  | -127.0143 | -0.2019511 | 0.7870303 | ENPP7     |
| cg22807700 | 0.3630716  | -89.83076 | -0.2019726 | 0.5650442 | DNTTIP2   |
| cg19067730 | 0.09405605 | -133.651  | -0.20199   | 0.296046  | PPGB      |
| cg25771201 | 0.3872259  | -90.55153 | -0.2020094 | 0.5892353 | SCDR10    |
| cg18431127 | 0.3364751  | -89.89673 | -0.2021066 | 0.5385817 | EPB42     |
| cg08804892 | 0.1506557  | -113.3582 | -0.2021633 | 0.352819  | TRAK1     |
| cg16377872 | 0.428175   | -93.34877 | -0.2021759 | 0.6303509 | SLC1A6    |
| cg20856834 | 0.4305288  | -93.57861 | -0.2021908 | 0.6327196 | OR12D3    |
| cg21256656 | 0.510094   | -105.2101 | -0.2022108 | 0.7123048 | KLK6      |
| cg10225525 | 0.3658567  | -90.11749 | -0.202222  | 0.5680788 | FUT8      |
| cg11505080 | 0.2036663  | -101.5755 | -0.2022367 | 0.405903  | GPR173    |
| cg03221914 | 0.1804023  | -106.1471 | -0.2022639 | 0.3826661 | HIST1H2AJ |
| cg10536916 | 0.3207767  | -90.35233 | -0.2022662 | 0.523043  | HIST1H4L  |
| cg03258472 | 0.2371795  | -96.62807 | -0.2023035 | 0.4394829 | CRB3      |
| cg21068030 | 0.5283213  | -109.5737 | -0.2023914 | 0.7307128 | LSMD1     |
| cg19206010 | 0.2180465  | -99.36835 | -0.2024025 | 0.420449  | UXT       |
| cg24290574 | 0.2627182  | -94.07529 | -0.2025731 | 0.4652913 | CPA3      |
| cg19486673 | 0.250992   | -95.25378 | -0.2025745 | 0.4535665 | LILRA2    |
| cg13644052 | 0.5956047  | -132.5007 | -0.2025945 | 0.7981992 | PAQR4     |
| cg22012981 | 0.3544276  | -90.44487 | -0.2027255 | 0.5571531 | ACOX2     |
| cg00958560 | 0.4466715  | -95.84428 | -0.2027903 | 0.6494617 | FLJ46481  |

|            |           |           |            |           |         |
|------------|-----------|-----------|------------|-----------|---------|
| cg04592706 | 0.5167238 | -107.4148 | -0.2028316 | 0.7195554 | ABCA4   |
| cg17981339 | 0.5624215 | -120.0301 | -0.2028787 | 0.7653002 | SBEM    |
| cg15178040 | 0.4460706 | -95.87499 | -0.2028827 | 0.6489533 | GSTA5   |
| cg13861644 | 0.4630741 | -98.10513 | -0.2030007 | 0.6660748 | PIWIL1  |
| cg12330929 | 0.5330703 | -111.6319 | -0.2030553 | 0.7361256 | USP9X   |
| cg16150435 | 0.5105851 | -106.3991 | -0.2030974 | 0.7136825 | C6orf15 |
| cg12144803 | 0.5825332 | -127.8833 | -0.2031484 | 0.7856817 | KALRN   |
| cg09923671 | 0.4793096 | -100.6474 | -0.2031484 | 0.682458  | GATA5   |
| cg08390209 | 0.3825158 | -91.50742 | -0.20317   | 0.5856858 | CDKN2B  |
| cg23504246 | 0.211026  | -101.2165 | -0.2031862 | 0.4142121 | FGF7    |
| cg06885782 | 0.2850199 | -92.86846 | -0.2031879 | 0.4882079 | KCNQ4   |
| cg00615241 | 0.2390755 | -97.20674 | -0.2031935 | 0.442269  | PRTN3   |
| cg20994561 | 0.6056077 | -138.1703 | -0.2031974 | 0.808805  | BAI1    |
| cg11584690 | 0.1579662 | -112.422  | -0.2032423 | 0.3612086 | ZNF574  |
| cg06806080 | 0.6224108 | -147.214  | -0.2032901 | 0.8257009 | CD47    |
| cg16609872 | 0.2700533 | -94.10276 | -0.2033092 | 0.4733625 | KCNQ1   |
| cg04545516 | 0.2724838 | -93.92446 | -0.2033234 | 0.4758072 | SEMG1   |
| cg04533291 | 0.5891379 | -130.9726 | -0.203389  | 0.7925268 | WDR39   |
| cg01910481 | 0.5212162 | -109.1741 | -0.2034093 | 0.7246255 | PLUNC   |
| cg24125648 | 0.1103606 | -128.29   | -0.2034914 | 0.313852  | HYPK    |
| cg04833845 | 0.4149586 | -93.75056 | -0.2036096 | 0.6185682 | KCNN4   |
| cg15862544 | 0.6377286 | -157.3248 | -0.2036514 | 0.84138   | EGFL4   |
| cg14724265 | 0.3543485 | -91.32681 | -0.2036557 | 0.5580043 | PPEF2   |

|            |           |           |            |           |          |
|------------|-----------|-----------|------------|-----------|----------|
| cg01353448 | 0.172928  | -109.1741 | -0.2036758 | 0.3766038 | C7orf16  |
| cg14154330 | 0.2923096 | -92.911   | -0.2037287 | 0.4960383 | ARHGAP27 |
| cg22081096 | 0.3007708 | -92.47596 | -0.2037386 | 0.5045093 | ABCA6    |
| cg13813391 | 0.5243897 | -110.3768 | -0.20376   | 0.7281497 | CMTM2    |
| cg03534410 | 0.6578997 | -172.1436 | -0.2037632 | 0.8616629 | TMEM40   |
| cg07974891 | 0.324768  | -91.67728 | -0.2037992 | 0.5285671 | ITGB1BP1 |
| cg10539808 | 0.5019423 | -105.5043 | -0.2038196 | 0.705762  | KCTD1    |
| cg14759043 | 0.1492355 | -115.4731 | -0.2038946 | 0.3531301 | MGC4266  |
| cg16480209 | 0.6531149 | -168.9923 | -0.2040313 | 0.8571462 | CNGB1    |
| cg13283751 | 0.1416964 | -117.8727 | -0.2040754 | 0.3457718 | GPX5     |
| cg03914452 | 0.3033435 | -92.68279 | -0.2040916 | 0.5074351 | PRR8     |
| cg23181133 | 0.320456  | -92.12511 | -0.2041632 | 0.5246192 | CEACAM3  |
| cg13994177 | 0.6392351 | -159.6063 | -0.2042915 | 0.8435266 | PWCR1    |
| cg16743289 | 0.222179  | -100.5326 | -0.2043273 | 0.4265063 | CACYBP   |
| cg17399166 | 0.5268653 | -111.7177 | -0.2043285 | 0.7311938 | CD1D     |
| cg27655855 | 0.4990722 | -105.5628 | -0.2043378 | 0.70341   | CST9L    |
| cg08108953 | 0.3221661 | -92.27032 | -0.2043659 | 0.526532  | WFDC13   |
| cg07892051 | 0.4380661 | -96.73796 | -0.2044908 | 0.6425568 | AKAP3    |
| cg08766149 | 0.4815065 | -102.5847 | -0.2045178 | 0.6860244 | GZMB     |
| cg19278780 | 0.440922  | -97.12758 | -0.2045793 | 0.6455013 | SIT1     |
| cg07123548 | 0.612431  | -144.2108 | -0.2046322 | 0.8170632 | HIPK4    |
| cg14437986 | 0.4107319 | -94.48828 | -0.20464   | 0.6153718 | C6orf25  |
| cg10045881 | 0.4901162 | -104.2829 | -0.2046772 | 0.6947934 | CHI3L2   |

|                |           |           |            |           |           |
|----------------|-----------|-----------|------------|-----------|-----------|
| cg1861112<br>2 | 0.410191  | -94.57658 | -0.204762  | 0.614953  | LASS2     |
| cg1445873<br>1 | 0.3453392 | -92.34988 | -0.2047651 | 0.5501044 | COQ4      |
| cg1938217<br>5 | 0.5225701 | -111.232  | -0.2047762 | 0.7273464 | PDE6A     |
| cg0499509<br>5 | 0.3197032 | -92.86891 | -0.2049434 | 0.5246466 | CD300E    |
| cg2278954<br>5 | 0.5532233 | -120.0301 | -0.2049645 | 0.7581878 | C20orf114 |
| cg0665379<br>6 | 0.4979872 | -106.1464 | -0.2049977 | 0.7029849 | LIME1     |
| cg1903355<br>5 | 0.3813765 | -93.26403 | -0.2050125 | 0.5863889 | DEFB1     |
| cg0499969<br>1 | 0.3572243 | -92.70312 | -0.2050634 | 0.5622877 | C7orf29   |
| cg1891317<br>1 | 0.5250844 | -112.3488 | -0.2051658 | 0.7302502 | SLAMF9    |
| cg1674270<br>3 | 0.4252211 | -96.27872 | -0.2052383 | 0.6304594 | KLK3      |
| cg0615459<br>7 | 0.3922946 | -93.98282 | -0.2052461 | 0.5975407 | MGC4618   |
| cg2260733<br>9 | 0.509111  | -108.7528 | -0.2052478 | 0.7143588 | MPL       |
| cg0441568<br>9 | 0.660033  | -177.3813 | -0.2052831 | 0.8653162 | TMEM16G   |
| cg1865617<br>0 | 0.5167412 | -110.8882 | -0.2055894 | 0.7223306 | LTB       |
| cg0455855<br>3 | 0.2813531 | -95.5366  | -0.2057916 | 0.4871447 | UGT2B7    |
| cg2599315<br>2 | 0.4977417 | -107.0962 | -0.2058125 | 0.7035542 | XAGE5     |
| cg1460676<br>8 | 0.3735073 | -93.79254 | -0.2058214 | 0.5793287 | C9        |
| cg0360857<br>7 | 0.5699576 | -127.2861 | -0.2059075 | 0.7758651 | OR12D3    |
| cg0744087<br>7 | 0.6639384 | -182.2    | -0.2059141 | 0.8698525 | FLJ46358  |
| cg0243668<br>6 | 0.2594693 | -97.49596 | -0.2059201 | 0.4653894 | GMFG      |
| cg1812866<br>6 | 0.5517191 | -120.9072 | -0.2059284 | 0.7576476 | NCOA1     |
| cg1532948<br>3 | 0.3911413 | -94.62595 | -0.2059486 | 0.5970898 | SSX7      |
| cg0804745<br>7 | 0.2850781 | -95.5366  | -0.2060615 | 0.4911396 | RASSF1    |



|            |           |           |            |           |          |
|------------|-----------|-----------|------------|-----------|----------|
| cg20074593 | 0.4209613 | -97.0089  | -0.2062898 | 0.627251  | GPR17    |
| cg20283107 | 0.3767894 | -94.59647 | -0.2065307 | 0.5833201 | FAM91A1  |
| cg03473518 | 0.1021711 | -134.8809 | -0.2065499 | 0.308721  | GJB6     |
| cg05873268 | 0.5232201 | -113.715  | -0.2065679 | 0.7297881 | TPSAB1   |
| cg20163033 | 0.5237079 | -113.8709 | -0.2065933 | 0.7303012 | C4orf8   |
| cg11161417 | 0.4569884 | -101.3284 | -0.2066438 | 0.6636322 | SPACA3   |
| cg06074920 | 0.5712246 | -129.1121 | -0.2067941 | 0.7780187 | KRTHA4   |
| cg21279865 | 0.5232372 | -114.0988 | -0.206854  | 0.7300912 | FAM106A  |
| cg13929970 | 0.5009649 | -109.1462 | -0.2069508 | 0.7079158 | FGFBP1   |
| cg01617750 | 0.4570633 | -101.6863 | -0.2069512 | 0.6640145 | CMTM8    |
| cg12354377 | 0.320552  | -94.8182  | -0.2070236 | 0.5275756 | ANK3     |
| cg26917999 | 0.42159   | -97.85574 | -0.2070412 | 0.6286312 | LZTS1    |
| cg25710140 | 0.4835494 | -105.9831 | -0.2071017 | 0.6906511 | MID1     |
| cg10345936 | 0.4556264 | -101.9217 | -0.2073293 | 0.6629558 | SLC36A2  |
| cg02096520 | 0.5068915 | -110.9346 | -0.2073876 | 0.7142791 | FGF16    |
| cg24661752 | 0.5761784 | -132.0575 | -0.2074211 | 0.7835994 | AP2M1    |
| cg04991214 | 0.3814266 | -95.76215 | -0.2075193 | 0.5889459 | PFDN2    |
| cg14654731 | 0.444903  | -100.7761 | -0.2075297 | 0.6524326 | FLJ30834 |
| cg26128441 | 0.3622904 | -95.19065 | -0.2075345 | 0.5698249 | P2RX3    |
| cg19521927 | 0.4424699 | -100.5474 | -0.2075856 | 0.6500555 | PLA2G5   |
| cg25712380 | 0.4986053 | -109.6962 | -0.2077941 | 0.7063993 | GRAP2    |
| cg06803253 | 0.4885941 | -107.8182 | -0.2078668 | 0.6964608 | GNAT1    |
| cg10523671 | 0.5690612 | -129.9799 | -0.2078826 | 0.7769439 | SLC15A2  |

|                |            |           |            |           |           |
|----------------|------------|-----------|------------|-----------|-----------|
| cg2345889<br>2 | 0.4455262  | -101.2971 | -0.2079281 | 0.6534544 | SIGLEC7   |
| cg1577236<br>1 | 0.7088255  | -238.3363 | -0.2079421 | 0.9167676 | SERPINB3  |
| cg0787348<br>8 | 0.6142798  | -151.3683 | -0.2080093 | 0.8222891 | MUC17     |
| cg1014692<br>9 | 0.1556749  | -117.8753 | -0.2081421 | 0.363817  | HIST1H1A  |
| cg0620662<br>8 | 0.5399513  | -120.4429 | -0.2081593 | 0.7481106 | FRMPD2    |
| cg1898811<br>0 | 0.2521665  | -100.3571 | -0.208176  | 0.4603425 | ATAD4     |
| cg0400166<br>8 | 0.7450367  | -303.2588 | -0.2082204 | 0.9532571 | GPR56     |
| cg0357374<br>7 | 0.4735396  | -105.785  | -0.2083777 | 0.6819173 | ADIPOQ    |
| cg1098604<br>3 | 0.3185608  | -96.31112 | -0.2085212 | 0.527082  | TCAP      |
| cg1148796<br>7 | 0.5059331  | -112.2771 | -0.2086185 | 0.7145516 | FLJ41327  |
| cg1264758<br>7 | 0.5864651  | -138.4051 | -0.2086249 | 0.79509   | C10orf129 |
| cg0408140<br>2 | 0.4779798  | -106.9727 | -0.2087455 | 0.6867254 | TCN2      |
| cg2195803<br>4 | 0.5659834  | -130.1516 | -0.2087522 | 0.7747356 | MST1      |
| cg2486248<br>3 | 0.09097334 | -142.3459 | -0.2087567 | 0.2997301 | CD300LG   |
| cg0353385<br>8 | 0.3147543  | -96.68515 | -0.2087883 | 0.5235426 | MORN1     |
| cg2283317<br>5 | 0.2904818  | -97.80792 | -0.208819  | 0.4993008 | WBP11     |
| cg1577971<br>6 | 0.3377067  | -96.4904  | -0.2090288 | 0.5467355 | CDCP1     |
| cg2009272<br>8 | 0.4127699  | -99.20407 | -0.2090317 | 0.6218016 | SLC5A12   |
| cg1991038<br>2 | 0.3865103  | -97.59267 | -0.2090985 | 0.5956088 | FABP1     |
| cg0513183<br>5 | 0.4444117  | -102.4866 | -0.2091258 | 0.6535376 | GH2       |
| cg0204601<br>7 | 0.2607742  | -100.3951 | -0.2091378 | 0.469912  | LOC220070 |
| cg2042397<br>7 | 0.5130836  | -114.6067 | -0.2091547 | 0.7222383 | PLAC4     |
| cg1835679<br>9 | 0.3156203  | -97.06407 | -0.2092179 | 0.5248383 | DSC1      |

|            |            |           |            |           |          |
|------------|------------|-----------|------------|-----------|----------|
| cg16192575 | 0.2152717  | -106.3117 | -0.2093026 | 0.4245744 | PTPN20B  |
| cg24660086 | 0.4597383  | -104.7462 | -0.2093243 | 0.6690627 | RGR      |
| cg07846167 | 0.1214991  | -130.141  | -0.2094073 | 0.3309064 | FBLIM1   |
| cg17141902 | 0.4176641  | -100.0769 | -0.2094607 | 0.6271248 | NINJ1    |
| cg26414720 | 0.503006   | -112.7669 | -0.2095227 | 0.7125286 | MAGEA1   |
| cg01820374 | 0.4362683  | -102.1124 | -0.2096418 | 0.6459101 | LAG3     |
| cg14308452 | 0.5066762  | -113.7784 | -0.2096671 | 0.7163433 | MGC24975 |
| cg08786003 | 0.3013696  | -98.0743  | -0.2096984 | 0.511068  | FCRL3    |
| cg27345534 | 0.344697   | -97.27721 | -0.2098535 | 0.5545505 | PRB2     |
| cg01868128 | 0.4066241  | -99.62025 | -0.2098746 | 0.6164987 | LCE5A    |
| cg02656594 | 0.1943968  | -110.6025 | -0.2099147 | 0.4043115 | IL21R    |
| cg22101098 | 0.4589886  | -105.715  | -0.2102534 | 0.669242  | SLC17A1  |
| cg21731286 | 0.642886   | -174.9227 | -0.2102978 | 0.8531839 | TAS1R2   |
| cg13018903 | 0.4509752  | -104.7196 | -0.2103689 | 0.6613441 | FLJ25530 |
| cg17542495 | 0.3687823  | -98.19172 | -0.2103808 | 0.5791631 | GJB1     |
| cg19618706 | 0.24111    | -103.8164 | -0.2104988 | 0.4516088 | BGN      |
| cg07974303 | 0.3420764  | -97.97424 | -0.2105599 | 0.5526363 | DEFA6    |
| cg18604842 | 0.686046   | -216.6688 | -0.2105744 | 0.8966204 | FLJ36046 |
| cg02142461 | 0.3646055  | -98.30611 | -0.2106111 | 0.5752166 | LYAR     |
| cg11241627 | 0.09071147 | -144.494  | -0.2106378 | 0.3013493 | FERD3L   |
| cg24777950 | 0.4556159  | -105.6767 | -0.2106381 | 0.666254  | CTSG     |
| cg09133026 | 0.5191917  | -118.1254 | -0.2106589 | 0.7298506 | RPS6KL1  |
| cg27349244 | 0.4410524  | -103.8446 | -0.2107112 | 0.6517636 | MLXIP    |

|            |           |           |            |           |           |
|------------|-----------|-----------|------------|-----------|-----------|
| cg06518271 | 0.5881565 | -142.87   | -0.2107872 | 0.7989437 | ADH6      |
| cg08191854 | 0.1311918 | -128.2506 | -0.2108738 | 0.3420657 | TRPM2     |
| cg07371530 | 0.6063206 | -152.262  | -0.2108819 | 0.8172026 | RPUSD1    |
| cg10379687 | 0.2172285 | -107.5833 | -0.2109413 | 0.4281698 | SPINLW1   |
| cg12891678 | 0.1983087 | -111.0109 | -0.2111251 | 0.4094338 | SPRR2D    |
| cg16628918 | 0.3186795 | -98.82211 | -0.2111301 | 0.5298096 | GPR172A   |
| cg26692016 | 0.437261  | -103.8867 | -0.2111529 | 0.6484139 | APOBEC1   |
| cg01684901 | 0.4643839 | -107.8091 | -0.2113512 | 0.6757351 | C3orf40   |
| cg09871043 | 0.2667862 | -102.0188 | -0.2114162 | 0.4782025 | PKHD1     |
| cg26757722 | 0.2545471 | -103.1875 | -0.2114243 | 0.4659714 | CACNG2    |
| cg18312429 | 0.3395851 | -98.88618 | -0.2114912 | 0.5510763 | SLC10A2   |
| cg09432154 | 0.3337244 | -98.93099 | -0.2115054 | 0.5452298 | GPR87     |
| cg22954265 | 0.5742286 | -137.8811 | -0.2115325 | 0.7857612 | FLJ45832  |
| cg23338993 | 0.4481618 | -105.6851 | -0.2115392 | 0.6597009 | UGT1A6    |
| cg27117399 | 0.3832223 | -99.9567  | -0.2115577 | 0.5947799 | CNDP1     |
| cg02825709 | 0.5185591 | -119.207  | -0.2115863 | 0.7301454 | ZNF75A    |
| cg26745032 | 0.2426844 | -104.6822 | -0.2115962 | 0.4542806 | REPS2     |
| cg17687282 | 0.5458591 | -127.4234 | -0.2116487 | 0.7575078 | A4GNT     |
| cg20090497 | 0.3503036 | -99.09348 | -0.211657  | 0.5619607 | TAS2R9    |
| cg21277505 | 0.6174102 | -160.3748 | -0.2117205 | 0.8291306 | LOC284361 |
| cg16155702 | 0.5576288 | -131.6853 | -0.2117465 | 0.7693753 | FGF21     |
| cg05556717 | 0.3871081 | -100.4401 | -0.211842  | 0.5989501 | CCL26     |
| cg04014889 | 0.5442906 | -127.2031 | -0.2118485 | 0.7561391 | MAGEL2    |

|                |            |           |            |           |        |
|----------------|------------|-----------|------------|-----------|--------|
| cg1184520<br>2 | 0.6188525  | -161.541  | -0.2118545 | 0.830707  | K5B    |
| cg1489889<br>2 | 0.3280098  | -99.36835 | -0.2118849 | 0.5398947 | SHRM   |
| cg1091920<br>4 | 0.2076791  | -110.1624 | -0.211975  | 0.4196541 | CDH6   |
| cg2082257<br>9 | 0.2134541  | -109.2081 | -0.2120016 | 0.4254557 | RIPK3  |
| cg0396021<br>7 | 0.1666907  | -118.8819 | -0.2120502 | 0.3787409 | LCE2C  |
| cg2326441<br>3 | 0.3918863  | -101.0242 | -0.2121456 | 0.6040319 | PSG4   |
| cg0464584<br>3 | 0.4524934  | -107.097  | -0.2122522 | 0.6647456 | DPCR1  |
| cg2298007<br>9 | 0.5662569  | -135.9554 | -0.2123564 | 0.7786133 | C4orf8 |
| cg2375621<br>9 | 0.2063733  | -110.8323 | -0.2124355 | 0.4188087 | DRP2   |
| cg1658561<br>9 | 0.4303517  | -104.5928 | -0.2124753 | 0.642827  | KRT19  |
| cg1569819<br>6 | 0.3419482  | -99.9989  | -0.2126061 | 0.5545543 | CAPN12 |
| cg1318128<br>4 | 0.6292015  | -169.9436 | -0.2126367 | 0.8418382 | KRT6B  |
| cg0279756<br>9 | 0.3636386  | -100.3571 | -0.2126605 | 0.5762991 | PCOLCE |
| cg0737835<br>0 | 0.2402599  | -106.0273 | -0.2126817 | 0.4529415 | GDF5   |
| cg2173238<br>3 | 0.2011671  | -112.1237 | -0.2127965 | 0.4139636 | THBS2  |
| cg1706700<br>5 | 0.5455956  | -129.1573 | -0.2128879 | 0.7584836 | IL10   |
| cg1287542<br>6 | 0.46171    | -109.3814 | -0.2130457 | 0.6747558 | DYM    |
| cg1239727<br>4 | 0.2570097  | -104.6487 | -0.2131944 | 0.4702042 | TINAG  |
| cg1896021<br>8 | 0.3669408  | -101.0468 | -0.2132527 | 0.5801935 | SLC7A7 |
| cg1905523<br>1 | 0.06406307 | -162.1195 | -0.2134786 | 0.2775417 | STAC   |
| cg2034210<br>5 | 0.2857499  | -102.5847 | -0.2135019 | 0.4992518 | BSCL2  |
| cg1581295<br>7 | 0.457736   | -109.4376 | -0.2136144 | 0.6713504 | VCY    |
| cg2411006<br>3 | 0.1917673  | -114.7277 | -0.213616  | 0.4053833 | COX6A2 |

|            |            |           |            |           |          |
|------------|------------|-----------|------------|-----------|----------|
| cg20017147 | 0.2966903  | -102.0913 | -0.2136215 | 0.5103118 | TEX101   |
| cg04345908 | 0.5086855  | -119.6643 | -0.2137794 | 0.7224649 | HLA-DQB2 |
| cg17920197 | 0.4465494  | -108.176  | -0.2138993 | 0.6604487 | LGI4     |
| cg25691167 | 0.04877738 | -172.5624 | -0.2139099 | 0.2626873 | FERD3L   |
| cg18279742 | 0.2684724  | -104.3346 | -0.2139669 | 0.4824393 | RPS2     |
| cg09044738 | 0.5934936  | -151.1153 | -0.2140073 | 0.807501  | FAM12A   |
| cg21707816 | 0.2907229  | -102.8458 | -0.2140729 | 0.5047958 | ENDOGL1  |
| cg00443307 | 0.3722323  | -102.0955 | -0.2140917 | 0.586324  | KLRG1    |
| cg26200585 | 0.370776   | -102.1546 | -0.2142063 | 0.5849823 | PRX      |
| cg19831369 | 0.3553012  | -101.7865 | -0.214258  | 0.5695592 | HPS4     |
| cg24841244 | 0.510265   | -120.7167 | -0.2142962 | 0.7245612 | CD3D     |
| cg25141490 | 0.2888876  | -103.2437 | -0.2143744 | 0.503262  | IL17B    |
| cg05700681 | 0.5762813  | -143.607  | -0.2144212 | 0.7907025 | CCL22    |
| cg25514503 | 0.6753203  | -215.1894 | -0.2144369 | 0.8897572 | PER3     |
| cg01119135 | 0.6642192  | -203.4983 | -0.2144524 | 0.8786716 | C1orf116 |
| cg09799714 | 0.4928102  | -116.9043 | -0.2144782 | 0.7072884 | PDZD3    |
| cg08158289 | 0.1613435  | -122.749  | -0.2145063 | 0.3758498 | KIAA0141 |
| cg03977657 | 0.5742772  | -142.8856 | -0.2145288 | 0.788806  | LAMB3    |
| cg22563697 | 0.496832   | -117.9027 | -0.2145756 | 0.7114077 | PPP1R16A |
| cg26571739 | 0.2011989  | -113.8792 | -0.2146088 | 0.4158077 | VAV1     |
| cg05507459 | 0.1988361  | -114.358  | -0.2146431 | 0.4134792 | C9orf121 |
| cg26626042 | 0.5770443  | -144.5079 | -0.2147651 | 0.7918094 | AGER     |
| cg12530021 | 0.1601247  | -123.5305 | -0.2149438 | 0.3750684 | SIGLEC12 |

|            |           |           |            |           |          |
|------------|-----------|-----------|------------|-----------|----------|
| cg03835296 | 0.3697836 | -102.9444 | -0.2150141 | 0.5847977 | SLC17A1  |
| cg15590780 | 0.2823191 | -104.3058 | -0.2150211 | 0.4973402 | USH2A    |
| cg20791593 | 0.4322418 | -107.6606 | -0.2150237 | 0.6472656 | NEU4     |
| cg09616556 | 0.5338601 | -128.5252 | -0.215032  | 0.7488921 | AMN      |
| cg22927134 | 0.3252684 | -102.5606 | -0.2150672 | 0.5403357 | CHRM5    |
| cg20436912 | 0.3472666 | -102.4948 | -0.2150714 | 0.5623379 | SEC14L4  |
| cg00057593 | 0.3584762 | -102.8929 | -0.2152885 | 0.5737647 | GML      |
| cg12473775 | 0.4581185 | -111.5254 | -0.2153302 | 0.6734487 | RHOD     |
| cg18303397 | 0.2483139 | -107.6606 | -0.2153387 | 0.4636526 | MBD4     |
| cg26457013 | 0.4151965 | -106.2424 | -0.2153566 | 0.6305531 | TMEM86B  |
| cg18967533 | 0.3239593 | -102.8713 | -0.2153628 | 0.539322  | KLK6     |
| cg21019522 | 0.3054777 | -103.4748 | -0.2154424 | 0.5209201 | SLC22A18 |
| cg06850526 | 0.3728408 | -103.52   | -0.2154535 | 0.5882943 | MGC15523 |
| cg17199658 | 0.2028702 | -114.4359 | -0.2154845 | 0.4183547 | MGC39715 |
| cg17298704 | 0.5839178 | -149.0085 | -0.2155175 | 0.7994353 | CLDN18   |
| cg23900225 | 0.3595401 | -103.1981 | -0.2155555 | 0.5750955 | CX40.1   |
| cg26159905 | 0.3607982 | -103.3238 | -0.2156475 | 0.5764457 | ASB10    |
| cg25548825 | 0.5612555 | -139.2858 | -0.2156757 | 0.7769311 | TBX10    |
| cg12435792 | 0.2892978 | -104.5337 | -0.2157026 | 0.5050005 | PDE6B    |
| cg20322862 | 0.2518222 | -107.6373 | -0.2157076 | 0.4675298 | TGIF     |
| cg06812844 | 0.3232847 | -103.2628 | -0.2157399 | 0.5390247 | TRPM2    |
| cg13739417 | 0.2891634 | -104.6487 | -0.215813  | 0.5049765 | IL8RB    |
| cg24388263 | 0.6505524 | -194.0012 | -0.2158161 | 0.8663685 | FLJ10374 |

|            |           |           |            |           |          |
|------------|-----------|-----------|------------|-----------|----------|
| cg14267151 | 0.4411982 | -109.7556 | -0.2158905 | 0.6570887 | MUTED    |
| cg06303238 | 0.4362492 | -109.23   | -0.2159844 | 0.6522335 | SALL4    |
| cg23801057 | 0.4279366 | -108.2769 | -0.2160044 | 0.643941  | P2RX7    |
| cg12992720 | 0.2488205 | -108.2699 | -0.2160151 | 0.4648356 | EDG4     |
| cg26316946 | 0.1265374 | -135.3045 | -0.2160451 | 0.3425826 | GRIK2    |
| cg13370916 | 0.213745  | -113.11   | -0.2160602 | 0.4298052 | STARD8   |
| cg13446199 | 0.3540049 | -103.6343 | -0.2160982 | 0.570103  | PSCA     |
| cg20368904 | 0.3934814 | -105.4568 | -0.216225  | 0.6097064 | TNFAIP2  |
| cg25889160 | 0.6269284 | -176.0668 | -0.2162744 | 0.8432028 | SERPINA5 |
| cg13424229 | 0.559344  | -139.6343 | -0.2163607 | 0.7757047 | CPA3     |
| cg09686308 | 0.2702664 | -106.6297 | -0.2164726 | 0.486739  | CIB3     |
| cg18951427 | 0.3210172 | -104.1326 | -0.2165556 | 0.5375728 | ACYP2    |
| cg18202456 | 0.7469674 | -344.0233 | -0.2166305 | 0.9635979 | KLF17    |
| cg19515446 | 0.6120256 | -166.8266 | -0.2166907 | 0.8287163 | HIST1H1T |
| cg22932819 | 0.5971285 | -158.1129 | -0.2167338 | 0.8138623 | GPNMB    |
| cg07220939 | 0.4079964 | -107.1379 | -0.2167567 | 0.6247531 | SLC22A12 |
| cg19250907 | 0.4355898 | -110.1278 | -0.2168275 | 0.6524173 | CPA6     |
| cg03552103 | 0.353833  | -104.5151 | -0.2169404 | 0.5707734 | 09-sep   |
| cg24926276 | 0.2781644 | -106.5736 | -0.2170292 | 0.4951937 | LRG1     |
| cg26531804 | 0.2600551 | -108.2699 | -0.2172038 | 0.4772589 | SPINT1   |
| cg14003512 | 0.3092874 | -105.2168 | -0.2173202 | 0.5266076 | PLGLB2   |
| cg06325687 | 0.6850085 | -235.524  | -0.2174622 | 0.9024706 | OPN1MW   |
| cg11291009 | 0.20865   | -115.4267 | -0.2175023 | 0.4261523 | ARHGFB9  |



|                |            |           |            |           |          |
|----------------|------------|-----------|------------|-----------|----------|
| cg2157890<br>6 | 0.5054407  | -123.8965 | -0.217518  | 0.7229587 | SLC5A4   |
| cg0143741<br>1 | 0.09706955 | -149.0012 | -0.2175183 | 0.3145879 | ATN1     |
| cg1126329<br>6 | 0.09125715 | -151.8851 | -0.2176297 | 0.3088868 | CCDC64   |
| cg1829425<br>7 | 0.1682727  | -124.1618 | -0.2176528 | 0.3859255 | SEC14L3  |
| cg0098389<br>9 | 0.4194969  | -109.2451 | -0.2176764 | 0.6371733 | CABP2    |
| cg1202963<br>9 | 0.2225614  | -113.3343 | -0.2176956 | 0.440257  | MAB21L1  |
| cg0068417<br>8 | 0.5097264  | -125.3479 | -0.2177397 | 0.7274661 | NEU4     |
| cg2376599<br>3 | 0.2627072  | -108.6699 | -0.2178621 | 0.4805694 | SPINLW1  |
| cg1446283<br>0 | 0.391186   | -107.1026 | -0.2178976 | 0.6090836 | TRDN     |
| cg0047400<br>4 | 0.3583052  | -105.6284 | -0.2179204 | 0.5762256 | IFNA14   |
| cg0298273<br>4 | 0.5034292  | -123.9675 | -0.2179426 | 0.7213718 | MAGEL2   |
| cg1261007<br>0 | 0.07408342 | -161.8515 | -0.2184202 | 0.2925036 | TSPAN15  |
| cg1318101<br>9 | 0.4863178  | -120.633  | -0.2184632 | 0.7047811 | MPP7     |
| cg0031969<br>2 | 0.2816611  | -107.8182 | -0.2185354 | 0.5001965 | ATP6V0D2 |
| cg0448478<br>9 | 0.5247437  | -130.872  | -0.2185848 | 0.7433285 | KRT25B   |
| cg0143208<br>7 | 0.3771518  | -107.0981 | -0.2186455 | 0.5957973 | FLJ21749 |
| cg1189869<br>5 | 0.5159232  | -128.4493 | -0.2187025 | 0.7346257 | PTCRA    |
| cg1083294<br>5 | 0.3490719  | -106.2862 | -0.2187366 | 0.5678085 | FLJ45964 |
| cg0311243<br>3 | 0.2377306  | -112.3613 | -0.2188448 | 0.4565755 | PFTK1    |
| cg0333051<br>6 | 0.4034827  | -109.1848 | -0.2189586 | 0.6224413 | SRMS     |
| cg2219370<br>2 | 0.565311   | -146.8115 | -0.2192109 | 0.7845219 | PADI1    |
| cg2145330<br>9 | 0.2142942  | -116.2902 | -0.2193223 | 0.4336165 | FAM101A  |
| cg2203984<br>6 | 0.636198   | -190.0201 | -0.2193229 | 0.8555208 | KIR2DL1  |

|            |            |           |            |           |           |
|------------|------------|-----------|------------|-----------|-----------|
| cg11656547 | 0.09402031 | -152.4557 | -0.219335  | 0.3133553 | MAMDC2    |
| cg04311964 | 0.5451729  | -139.023  | -0.2194051 | 0.764578  | LYPD2     |
| cg20305726 | 0.3218206  | -107.0227 | -0.2194158 | 0.5412364 | DEFB126   |
| cg15648315 | 0.498427   | -124.7801 | -0.2194421 | 0.717869  | FLJ26443  |
| cg17267907 | 0.2563442  | -110.8517 | -0.2194478 | 0.4757919 | DEFA1     |
| cg01135626 | 0.3654258  | -107.5444 | -0.2195304 | 0.5849562 | CDX4      |
| cg14141399 | 0.2872022  | -108.4826 | -0.2195471 | 0.5067493 | HAS1      |
| cg12242338 | 0.5017115  | -125.9647 | -0.219686  | 0.7213975 | TRIM42    |
| cg03386373 | 0.3496687  | -107.3353 | -0.2197315 | 0.5694003 | SPATA3    |
| cg09212058 | 0.4603921  | -117.2545 | -0.219732  | 0.6801241 | PRKD3     |
| cg03453449 | 0.3951812  | -109.3836 | -0.2197368 | 0.6149181 | USP44     |
| cg02173484 | 0.3133023  | -107.5786 | -0.2197764 | 0.5330787 | GJA5      |
| cg12949760 | 0.4747545  | -119.9494 | -0.2197765 | 0.694531  | KCNQ1     |
| cg11819637 | 0.4289439  | -112.6936 | -0.2197796 | 0.6487235 | THPO      |
| cg03387497 | 0.5588648  | -145.1778 | -0.2198847 | 0.7787495 | C20orf179 |
| cg08260891 | 0.07607399 | -162.5331 | -0.2200056 | 0.2960796 | PPGB      |
| cg19258973 | 0.394797   | -109.6962 | -0.2200423 | 0.6148393 | KRTHB3    |
| cg05241571 | 0.6176115  | -177.8521 | -0.2202133 | 0.8378248 | UNQ467    |
| cg13614083 | 0.444732   | -115.3816 | -0.2202474 | 0.6649794 | KCNAB2    |
| cg03840259 | 0.3709323  | -108.5494 | -0.2202716 | 0.5912039 | GRAP2     |
| cg12237269 | 0.4900029  | -123.88   | -0.2202724 | 0.7102754 | SLN       |
| cg03270204 | 0.5919597  | -161.9077 | -0.2202804 | 0.8122401 | DDR1      |
| cg10417559 | 0.5583347  | -145.7199 | -0.2203439 | 0.7786786 | LMO6      |

|                |            |           |            |           |          |
|----------------|------------|-----------|------------|-----------|----------|
| cg1150464<br>6 | 0.4053442  | -110.9225 | -0.2203844 | 0.6257287 | RTP1     |
| cg1782776<br>7 | 0.5953508  | -164.1582 | -0.2204568 | 0.8158076 | LRRC21   |
| cg1753923<br>5 | 0.546217   | -141.1202 | -0.2204766 | 0.7666936 | KISS1    |
| cg1143279<br>7 | 0.4739419  | -120.7567 | -0.2205482 | 0.6944901 | SPN      |
| cg2282548<br>7 | 0.4747171  | -120.9139 | -0.2205507 | 0.6952678 | VNN3     |
| cg0789514<br>9 | 0.04009487 | -186.8419 | -0.2205872 | 0.260682  | FAM26B   |
| cg1308646<br>7 | 0.4355769  | -114.5347 | -0.2206309 | 0.6562078 | MORG1    |
| cg2630697<br>6 | 0.6228632  | -182.7849 | -0.2207357 | 0.843599  | ITGB1BP1 |
| cg2246391<br>5 | 0.3665643  | -108.8694 | -0.22074   | 0.5873044 | EEF1A2   |
| cg0986306<br>6 | 0.2091056  | -118.6541 | -0.220789  | 0.4298946 | PVALB    |
| cg0436598<br>0 | 0.4096697  | -111.7954 | -0.2207974 | 0.6304671 | CLEC3A   |
| cg2078962<br>0 | 0.2222428  | -116.5719 | -0.2208519 | 0.4430947 | FSD1     |
| cg1946425<br>2 | 0.2857238  | -110.2575 | -0.2212215 | 0.5069454 | FBS1     |
| cg0619637<br>9 | 0.2177104  | -117.7615 | -0.2213322 | 0.4390426 | TREM1    |
| cg0096279<br>9 | 0.4832915  | -124.0511 | -0.2215385 | 0.70483   | SSX8     |
| cg2578798<br>4 | 0.2197335  | -117.7188 | -0.2216065 | 0.44134   | DKK3     |
| cg2017698<br>9 | 0.3775493  | -110.3434 | -0.2216386 | 0.5991879 | KIR3DL2  |
| cg1579815<br>3 | 0.2036628  | -120.7167 | -0.2218775 | 0.4255403 | PFTK1    |
| cg0445405<br>0 | 0.3908007  | -111.5593 | -0.2219973 | 0.6127979 | TREML1   |
| cg1983272<br>1 | 0.4019616  | -112.7238 | -0.2222615 | 0.6242231 | KIAA1267 |
| cg2276746<br>6 | 0.4976611  | -128.6247 | -0.2223322 | 0.7199932 | TRIM49   |
| cg0062611<br>9 | 0.3144006  | -110.2202 | -0.2223859 | 0.5367865 | NTRK1    |
| cg2426237<br>6 | 0.3179987  | -110.2525 | -0.2224953 | 0.540494  | SCNM1    |

|            |           |           |            |           |          |
|------------|-----------|-----------|------------|-----------|----------|
| cg22496683 | 0.3713499 | -110.9841 | -0.2225321 | 0.593882  | MGC27016 |
| cg18344063 | 0.274103  | -112.3613 | -0.222533  | 0.496636  | MGAT4C   |
| cg23812886 | 0.3097421 | -110.5036 | -0.2225404 | 0.5322825 | SSX5     |
| cg04893119 | 0.213326  | -119.9494 | -0.2227789 | 0.436105  | PI15     |
| cg24252809 | 0.3750048 | -111.5254 | -0.2228511 | 0.5978559 | MRGPRX1  |
| cg13705284 | 0.2900616 | -111.823  | -0.2230152 | 0.5130768 | ACOX2    |
| cg16509045 | 0.2579085 | -114.2942 | -0.2230365 | 0.480945  | TRPM6    |
| cg27069753 | 0.3009391 | -111.332  | -0.2230514 | 0.5239905 | ELA3B    |
| cg25462291 | 0.1429741 | -137.1779 | -0.2230556 | 0.3660297 | HEYL     |
| cg00673191 | 0.2239732 | -118.5535 | -0.223068  | 0.4470413 | DOPEY2   |
| cg22396129 | 0.2605676 | -114.1637 | -0.2231603 | 0.4837278 | ZCRB1    |
| cg26511321 | 0.3369316 | -110.8529 | -0.2232245 | 0.560156  | HOXA7    |
| cg04515986 | 0.2452495 | -115.9272 | -0.223285  | 0.4685345 | FTHL17   |
| cg02723372 | 0.5697455 | -156.0809 | -0.2233765 | 0.793122  | RUNX3    |
| cg01375994 | 0.3314298 | -111.0437 | -0.223421  | 0.5548508 | MXRA5    |
| cg10414946 | 0.4074758 | -114.6245 | -0.2234836 | 0.6309593 | MS4A2    |
| cg22627427 | 0.6216372 | -187.9505 | -0.2234917 | 0.8451289 | C11orf9  |
| cg16907488 | 0.4333744 | -117.7007 | -0.2235114 | 0.6568857 | CCDC17   |
| cg03993463 | 0.6193956 | -186.4161 | -0.2235608 | 0.8429564 | KCNJ15   |
| cg26884581 | 0.1737842 | -129.0191 | -0.2235984 | 0.3973826 | PYGM     |
| cg14672680 | 0.6607402 | -224.502  | -0.2237027 | 0.8844429 | TNNI2    |
| cg27087809 | 0.5283981 | -139.8231 | -0.223753  | 0.7521511 | ACSBG1   |
| cg15518950 | 0.2485251 | -116.0671 | -0.2237896 | 0.4723147 | PRP2     |

|            |           |           |            |           |          |
|------------|-----------|-----------|------------|-----------|----------|
| cg07664027 | 0.5567096 | -150.8834 | -0.2238456 | 0.7805552 | RPL13A   |
| cg02658251 | 0.424479  | -116.998  | -0.2238896 | 0.6483686 | DEFB4    |
| cg00364814 | 0.4329502 | -118.1859 | -0.2239744 | 0.6569245 | R3HDM2   |
| cg07173760 | 0.2874796 | -112.9453 | -0.2239871 | 0.5114667 | CLC      |
| cg06132342 | 0.3600129 | -112.2092 | -0.2240814 | 0.5840943 | KRTHB5   |
| cg07937272 | 0.2574245 | -115.5969 | -0.224254  | 0.4816785 | PARP12   |
| cg09748960 | 0.2712558 | -114.3533 | -0.2242625 | 0.4955182 | BTNL2    |
| cg13828758 | 0.273511  | -114.2003 | -0.2242858 | 0.4977968 | NDN      |
| cg14321743 | 0.42284   | -117.3653 | -0.2243665 | 0.6472065 | PLA2G2D  |
| cg11721194 | 0.3508886 | -112.2682 | -0.2243806 | 0.5752692 | SLAMF7   |
| cg00466436 | 0.2890034 | -113.294  | -0.2244083 | 0.5134117 | DEFB126  |
| cg23114594 | 0.4846773 | -128.336  | -0.2244261 | 0.7091034 | C10orf30 |
| cg13445249 | 0.3386483 | -112.1692 | -0.2244577 | 0.5631061 | DSG4     |
| cg00823148 | 0.5078383 | -134.5338 | -0.224533  | 0.7323713 | CRYGB    |
| cg00777121 | 0.2268729 | -119.6932 | -0.2246031 | 0.451476  | RASSF1   |
| cg17217677 | 0.4218591 | -117.6313 | -0.2246934 | 0.6465526 | SMPD3    |
| cg12682367 | 0.3883427 | -114.4359 | -0.2247436 | 0.6130863 | FLJ46358 |
| cg20011352 | 0.1296738 | -143.5838 | -0.2247488 | 0.3544226 | GPR124   |
| cg10051054 | 0.5175785 | -137.8112 | -0.224767  | 0.7423455 | CCDC27   |
| cg05135288 | 0.2503102 | -117.0429 | -0.2249336 | 0.4752438 | RHOT2    |
| cg17191715 | 0.4420363 | -120.8655 | -0.2250957 | 0.667132  | CA1      |
| cg16567044 | 0.3394385 | -112.8535 | -0.2251125 | 0.564551  | MEG3     |
| cg00406188 | 0.3969425 | -115.6008 | -0.2251582 | 0.6221007 | LCE2C    |

|            |            |           |            |           |          |
|------------|------------|-----------|------------|-----------|----------|
| cg20790540 | 0.4319594  | -119.6643 | -0.2252899 | 0.6572493 | PTCRA    |
| cg26218269 | 0.2634018  | -116.1754 | -0.2253715 | 0.4887733 | MAB21L2  |
| cg14178895 | 0.2279179  | -120.3357 | -0.2253852 | 0.4533031 | C6orf105 |
| cg03956628 | 0.1740755  | -130.8432 | -0.2253882 | 0.3994637 | MLH1     |
| cg01185080 | 0.3244218  | -113.2157 | -0.225447  | 0.5498688 | ZNF710   |
| cg25082710 | 0.219505   | -121.7242 | -0.2254889 | 0.4449939 | IVL      |
| cg09343150 | 0.549452   | -150.5838 | -0.2255042 | 0.7749562 | MEN1     |
| cg06577725 | 0.4441628  | -121.7312 | -0.2255097 | 0.6696725 | SPATA16  |
| cg10099900 | 0.4769881  | -128.1315 | -0.2255631 | 0.7025512 | PSMF1    |
| cg26227465 | 0.3323736  | -113.3262 | -0.2255849 | 0.5579584 | IFNG     |
| cg20401945 | 0.1518883  | -137.2531 | -0.2257033 | 0.3775916 | ASPHD1   |
| cg22424444 | 0.6536704  | -222.4047 | -0.2257578 | 0.8794282 | TOLLIP   |
| cg18994063 | 0.3182959  | -113.705  | -0.2258256 | 0.5441215 | TIMD4    |
| cg03312792 | 0.5686073  | -159.9838 | -0.2258748 | 0.7944821 | SEMG2    |
| cg14288464 | 0.5413928  | -148.442  | -0.226184  | 0.7675768 | WFDC5    |
| cg21846488 | 0.1796428  | -130.4675 | -0.2263098 | 0.4059526 | LCE4A    |
| cg07657776 | 0.4061101  | -117.8765 | -0.2263883 | 0.6324984 | UBE3B    |
| cg23047271 | 0.1111822  | -152.8436 | -0.2266049 | 0.3377871 | PRICKLE2 |
| cg04132607 | 0.6324897  | -204.1801 | -0.2266346 | 0.8591244 | GATA5    |
| cg04623837 | 0.07476372 | -170.9396 | -0.2266625 | 0.3014262 | HCG9     |
| cg21045917 | 0.3927364  | -117.1192 | -0.2267816 | 0.619518  | ALAS2    |
| cg17910564 | 0.3526103  | -114.988  | -0.2268496 | 0.57946   | VDAC3    |
| cg17786776 | 0.3580202  | -115.2119 | -0.2268927 | 0.584913  | FKBP9    |

|            |           |           |            |           |           |
|------------|-----------|-----------|------------|-----------|-----------|
| cg07924575 | 0.2919595 | -115.7589 | -0.2269194 | 0.5188788 | HPS4      |
| cg15234096 | 0.472664  | -129.0412 | -0.226961  | 0.699625  | LIX1      |
| cg12775613 | 0.40224   | -118.1684 | -0.2269681 | 0.6292081 | HTR1F     |
| cg25650811 | 0.4405864 | -123.1045 | -0.2270429 | 0.6676292 | LOC223075 |
| cg17706173 | 0.2113422 | -124.7674 | -0.2270778 | 0.43842   | C16orf30  |
| cg02397720 | 0.1190459 | -150.1537 | -0.2271084 | 0.3461542 | RAB17     |
| cg17501569 | 0.5844321 | -170.8244 | -0.2271537 | 0.8115858 | MSLN      |
| cg10490064 | 0.4884852 | -133.0932 | -0.2271955 | 0.7156807 | CRYBB2    |
| cg22381955 | 0.7304013 | -348.7749 | -0.2272445 | 0.9576458 | CHFR      |
| cg18884741 | 0.5919424 | -175.8132 | -0.2273896 | 0.819332  | RABGEF1   |
| cg07022477 | 0.3126059 | -115.5575 | -0.2274546 | 0.5400606 | HIF3A     |
| cg23213217 | 0.3304578 | -115.4668 | -0.2275667 | 0.5580245 | DEGS1     |
| cg17687962 | 0.5096968 | -139.6139 | -0.2275814 | 0.7372782 | KLK3      |
| cg07296772 | 0.5170985 | -141.9682 | -0.2275887 | 0.7446873 | CHMP4A    |
| cg21723486 | 0.3611399 | -116.1412 | -0.227624  | 0.5887639 | TP73L     |
| cg19875656 | 0.5641456 | -160.9859 | -0.227639  | 0.7917845 | TSP50     |
| cg01739167 | 0.3449625 | -115.7972 | -0.227751  | 0.5727136 | CHRNE     |
| cg25778479 | 0.1600235 | -137.1139 | -0.2277686 | 0.3877921 | ANKMY2    |
| cg00466249 | 0.3685535 | -116.6604 | -0.2277876 | 0.5963411 | MGC15523  |
| cg23683201 | 0.4338133 | -123.0498 | -0.227825  | 0.6616384 | SLC22A9   |
| cg27285056 | 0.467901  | -129.1785 | -0.2278255 | 0.6957265 | NAPSA     |
| cg01917648 | 0.2972334 | -116.4882 | -0.2278409 | 0.5250742 | SPIC      |
| cg16601385 | 0.3978977 | -118.9715 | -0.2279941 | 0.6258917 | CFD       |

|            |            |           |            |           |           |
|------------|------------|-----------|------------|-----------|-----------|
| cg05275605 | 0.6695982  | -247.6331 | -0.2280443 | 0.8976426 | C21orf123 |
| cg23065097 | 0.211938   | -125.7195 | -0.2280629 | 0.4400008 | FKBP1B    |
| cg03379131 | 0.05784637 | -183.1756 | -0.2281241 | 0.2859704 | ADAM15    |
| cg07506795 | 0.6450031  | -219.9616 | -0.2281993 | 0.8732024 | ZNF19     |
| cg23444894 | 0.5145296  | -142.164  | -0.2282607 | 0.7427903 | UNQ5810   |
| cg23696886 | 0.1650369  | -136.3306 | -0.2283128 | 0.3933496 | PDLIM2    |
| cg05600717 | 0.07790525 | -171.5166 | -0.2286945 | 0.3065997 | FLJ13639  |
| cg18806980 | 0.4196835  | -122.236  | -0.2287543 | 0.6484378 | KIAA0703  |
| cg05446471 | 0.6106144  | -191.4423 | -0.2287717 | 0.8393861 | HDAC11    |
| cg25598083 | 0.3616797  | -117.4581 | -0.2287829 | 0.5904626 | ACOT2     |
| cg13407883 | 0.3613777  | -117.473  | -0.2288094 | 0.5901871 | SIGLEC9   |
| cg14404298 | 0.3387633  | -116.9276 | -0.2288656 | 0.5676289 | CYP8B1    |
| cg06233503 | 0.3351398  | -116.8972 | -0.2288657 | 0.5640055 | KCNQ1     |
| cg02202484 | 0.3864058  | -119.0722 | -0.2289189 | 0.6153247 | SPRR4     |
| cg03818682 | 0.4010755  | -120.4363 | -0.229004  | 0.6300795 | MUC5AC    |
| cg01987509 | 0.3562335  | -117.6192 | -0.2291169 | 0.5853504 | PGR       |
| cg07005767 | 0.4906001  | -136.4593 | -0.2291587 | 0.7197588 | ABRA      |
| cg23641267 | 0.4176008  | -122.725  | -0.2293546 | 0.6469554 | LPXN      |
| cg01587454 | 0.6215651  | -201.4824 | -0.229408  | 0.8509731 | WDR21C    |
| cg06793062 | 0.5333557  | -150.8952 | -0.2295982 | 0.7629538 | CNTNAP4   |
| cg09971646 | 0.1795304  | -134.0368 | -0.229605  | 0.4091354 | DLK1      |
| cg05341878 | 0.3109239  | -117.8918 | -0.2296068 | 0.5405307 | RIMS2     |
| cg22218909 | 0.6342463  | -213.2303 | -0.2296345 | 0.8638808 | DEFA3     |



|            |            |           |            |           |          |
|------------|------------|-----------|------------|-----------|----------|
| cg08711674 | 0.2721584  | -119.9039 | -0.229653  | 0.5018114 | AKT1S1   |
| cg13733733 | 0.3572831  | -118.4152 | -0.2298016 | 0.5870848 | LILRA3   |
| cg19906550 | 0.3855637  | -120.099  | -0.2298681 | 0.6154318 | SLC22A18 |
| cg04048249 | 0.4278722  | -124.8311 | -0.2299363 | 0.6578084 | APOC3    |
| cg07608333 | 0.278921   | -119.8705 | -0.2300811 | 0.5090021 | CD209    |
| cg12547930 | 0.3850092  | -120.3322 | -0.2301027 | 0.6151119 | WFDC6    |
| cg20951539 | 0.4017378  | -121.8139 | -0.2301043 | 0.6318421 | PXT1     |
| cg05942970 | 0.6636738  | -246.3971 | -0.2301271 | 0.8938009 | C10orf39 |
| cg22436411 | 0.3822428  | -120.3989 | -0.2303458 | 0.6125886 | FCGR2B   |
| cg19998328 | 0.3340025  | -118.623  | -0.2304541 | 0.5644566 | LOC90580 |
| cg14911395 | 0.2403131  | -124.1313 | -0.2305958 | 0.4709089 | SEMA3B   |
| cg22937804 | 0.3077793  | -119.0505 | -0.2305975 | 0.5383769 | MGC44505 |
| cg11297236 | 0.2785886  | -120.4429 | -0.2306221 | 0.5092107 | PDILT    |
| cg25553916 | 0.2920533  | -119.7907 | -0.230725  | 0.5227784 | FLJ22318 |
| cg03014957 | 0.3358972  | -118.9542 | -0.2307377 | 0.5666349 | DEFB118  |
| cg21094154 | 0.4874387  | -137.9796 | -0.2308084 | 0.7182471 | TNFSF11  |
| cg01367992 | 0.3588064  | -119.6339 | -0.2308194 | 0.5896258 | LY9      |
| cg00280814 | 0.6012024  | -189.1597 | -0.2308462 | 0.8320487 | FLJ31568 |
| cg11267879 | 0.3317075  | -119.068  | -0.2308736 | 0.5625811 | CYP2F1   |
| cg04557383 | 0.09437371 | -165.3826 | -0.2308772 | 0.3252509 | MT1H     |
| cg24691255 | 0.5921419  | -183.164  | -0.2309141 | 0.823056  | SERPINB2 |
| cg21541083 | 0.5755236  | -173.33   | -0.2310725 | 0.8065962 | STXBP2   |
| cg13877895 | 0.6063272  | -193.5065 | -0.2311292 | 0.8374563 | GKN1     |

|            |           |           |            |           |          |
|------------|-----------|-----------|------------|-----------|----------|
| cg13410437 | 0.4857986 | -138.0162 | -0.2311365 | 0.716935  | OR5P2    |
| cg03458191 | 0.5184245 | -147.9253 | -0.2311428 | 0.7495673 | SAA1     |
| cg26661623 | 0.4026345 | -123.3452 | -0.2312751 | 0.6339096 | ASGR2    |
| cg14173523 | 0.4293409 | -126.8619 | -0.2313341 | 0.660675  | FUT5     |
| cg27214365 | 0.5255678 | -151.1611 | -0.2315726 | 0.7571404 | GYPB     |
| cg25677709 | 0.5097864 | -145.8184 | -0.2316507 | 0.7414371 | NDST1    |
| cg24076830 | 0.3390107 | -120.0921 | -0.2317421 | 0.5707527 | OR5V1    |
| cg02765820 | 0.3449202 | -120.3246 | -0.2318457 | 0.576766  | C3orf22  |
| cg22609784 | 0.2187094 | -128.6588 | -0.2318691 | 0.4505785 | MSX1     |
| cg19717326 | 0.2153663 | -129.3206 | -0.2319871 | 0.4473534 | MYADM    |
| cg13601079 | 0.5370651 | -156.4181 | -0.2319887 | 0.7690538 | SSX3     |
| cg19464944 | 0.313268  | -120.5244 | -0.2321003 | 0.5453683 | FCGR1A   |
| cg13694749 | 0.4523713 | -131.9097 | -0.232186  | 0.6845574 | SCN4A    |
| cg17820828 | 0.4922748 | -141.459  | -0.2322656 | 0.7245404 | KCNQ1    |
| cg05248470 | 0.2531202 | -124.4531 | -0.2322817 | 0.4854019 | LILRB2   |
| cg14440664 | 0.3288474 | -120.6947 | -0.2323755 | 0.5612229 | PDCD1LG2 |
| cg08816023 | 0.3036424 | -121.116  | -0.2324145 | 0.5360569 | FGF1     |
| cg00134539 | 0.4773838 | -137.7897 | -0.2324648 | 0.7098486 | UBASH3A  |
| cg03352153 | 0.4625567 | -134.7238 | -0.2327194 | 0.6952761 | GLULD1   |
| cg10885338 | 0.3785019 | -123.0319 | -0.2328066 | 0.6113085 | ECRG4    |
| cg24490338 | 0.4870744 | -140.8363 | -0.2328219 | 0.7198963 | TPM3     |
| cg13530039 | 0.3007274 | -121.7627 | -0.232906  | 0.5336334 | CHRM1    |
| cg23218877 | 0.4153374 | -126.9244 | -0.2329308 | 0.6482682 | C10orf9  |

|                |            |           |            |           |           |
|----------------|------------|-----------|------------|-----------|-----------|
| cg2677127<br>2 | 0.5683684  | -172.9727 | -0.2329493 | 0.8013176 | SMCR7     |
| cg2487027<br>3 | 0.3827364  | -123.5313 | -0.232963  | 0.6156994 | STK19     |
| cg2332840<br>4 | 0.3725308  | -122.8993 | -0.2330412 | 0.605572  | ChGn      |
| cg0105362<br>1 | 0.3346139  | -121.8418 | -0.2333677 | 0.5679817 | APOA2     |
| cg2481686<br>6 | 0.5141323  | -149.9573 | -0.2333781 | 0.7475104 | PARK2     |
| cg0556922<br>0 | 0.3470109  | -122.1571 | -0.2334278 | 0.5804387 | FLJ44861  |
| cg2375361<br>0 | 0.6966464  | -307.5182 | -0.233544  | 0.9301904 | DNAHL1    |
| cg0060317<br>2 | 0.512613   | -149.8226 | -0.2336194 | 0.7462324 | BOK       |
| cg1084836<br>7 | 0.4205082  | -128.5853 | -0.2336919 | 0.6542001 | SCGB1D2   |
| cg1268746<br>3 | 0.2874047  | -123.2786 | -0.2337179 | 0.5211226 | CFHR1     |
| cg2497459<br>9 | 0.4279639  | -129.7647 | -0.2337796 | 0.6617435 | CFH       |
| cg2715971<br>9 | 0.1936632  | -135.3898 | -0.2337855 | 0.4274487 | TMEM71    |
| cg2714700<br>4 | 0.5984142  | -193.6247 | -0.2337897 | 0.8322039 | PIWIL1    |
| cg1806314<br>9 | 0.4564127  | -134.9758 | -0.2338481 | 0.6902608 | FMO3      |
| cg1077918<br>3 | 0.5082952  | -148.7899 | -0.2338858 | 0.7421809 | ELA3A     |
| cg2196011<br>0 | 0.4418234  | -132.2702 | -0.2339314 | 0.6757548 | HBZ       |
| cg2140203<br>5 | 0.368232   | -123.7243 | -0.2339716 | 0.6022036 | GALR3     |
| cg1714213<br>4 | 0.6163093  | -208.96   | -0.234391  | 0.8507003 | SLC2A2    |
| cg1709185<br>1 | 0.2930851  | -123.7651 | -0.2344323 | 0.5275174 | LOC348174 |
| cg0869522<br>3 | 0.2971879  | -123.7319 | -0.2345613 | 0.5317491 | SLC9A6    |
| cg0391642<br>1 | 0.1914443  | -136.7382 | -0.2345812 | 0.4260255 | LOC132321 |
| cg1401504<br>4 | 0.05514169 | -192.8586 | -0.2345933 | 0.289735  | TNFRSF10C |
| cg1348223<br>3 | 0.474011   | -140.0317 | -0.2346182 | 0.7086292 | HEPH      |

|            |           |           |            |           |           |
|------------|-----------|-----------|------------|-----------|-----------|
| cg16899306 | 0.387115  | -125.9153 | -0.2346197 | 0.6217347 | HLA-DQB2  |
| cg24621042 | 0.308225  | -123.4939 | -0.2346619 | 0.5428869 | SERPINA1  |
| cg24541550 | 0.3386225 | -123.5447 | -0.2348017 | 0.5734241 | MRVI1     |
| cg10503138 | 0.4868561 | -143.7555 | -0.234841  | 0.7216971 | CNTN4     |
| cg03782453 | 0.149296  | -148.3445 | -0.2350869 | 0.3843829 | FLJ90575  |
| cg18059223 | 0.3810874 | -126.2843 | -0.2353396 | 0.616427  | NALP2     |
| cg20516209 | 0.3977765 | -127.8833 | -0.2353551 | 0.6331316 | EMILIN1   |
| cg06277657 | 0.2440684 | -129.002  | -0.2354955 | 0.4795639 | DGKI      |
| cg26770281 | 0.6259612 | -220.3191 | -0.235511  | 0.8614722 | FLJ14768  |
| cg26918728 | 0.5980395 | -197.3103 | -0.2355756 | 0.8336151 | SEMA3B    |
| cg09584711 | 0.2179215 | -133.0143 | -0.235771  | 0.4536925 | HPR       |
| cg03860768 | 0.4081313 | -129.5634 | -0.2357751 | 0.6439065 | BLK       |
| cg06226384 | 0.1684461 | -143.607  | -0.2357816 | 0.4042277 | CACNG5    |
| cg14869028 | 0.1028471 | -167.026  | -0.2357884 | 0.3386355 | TINAGL1   |
| cg03782727 | 0.6192601 | -215.3519 | -0.2359555 | 0.8552155 | FFAR1     |
| cg05492113 | 0.4299538 | -133.1035 | -0.2361014 | 0.6660552 | TUB       |
| cg15830940 | 0.3297043 | -124.9655 | -0.2361341 | 0.5658384 | SMARCAL1  |
| cg09841009 | 0.5177139 | -155.8913 | -0.2362092 | 0.7539231 | GYPA      |
| cg20488657 | 0.4550422 | -137.989  | -0.2362553 | 0.6912975 | TFF3      |
| cg00344709 | 0.5390438 | -164.8517 | -0.2363951 | 0.7754389 | ANKRD21   |
| cg25020204 | 0.3417281 | -125.4727 | -0.2363987 | 0.5781268 | DBH       |
| cg08603768 | 0.4196449 | -131.9695 | -0.2364368 | 0.6560817 | WNT8A     |
| cg01407244 | 0.1679115 | -144.494  | -0.2364639 | 0.4043754 | TNFRSF10C |

|            |           |           |            |           |          |
|------------|-----------|-----------|------------|-----------|----------|
| cg16899036 | 0.3770697 | -127.5884 | -0.2366641 | 0.6137337 | HOMER3   |
| cg02988947 | 0.311791  | -125.6922 | -0.2366668 | 0.5484578 | LIMD2    |
| cg18509435 | 0.4815055 | -144.9973 | -0.2366763 | 0.7181818 | CDH20    |
| cg19138960 | 0.2576455 | -128.8608 | -0.2367084 | 0.4943539 | C1QR1    |
| cg03775123 | 0.4741894 | -143.2147 | -0.2367658 | 0.7109551 | ANKDD1A  |
| cg09948350 | 0.5582989 | -174.9883 | -0.2368093 | 0.7951082 | FLJ25084 |
| cg09418321 | 0.2423081 | -130.8004 | -0.236939  | 0.4792472 | DYRK4    |
| cg13530946 | 0.3596939 | -126.8317 | -0.2369568 | 0.5966507 | IARS2    |
| cg04117029 | 0.4676306 | -141.9085 | -0.2369876 | 0.7046182 | UROS     |
| cg10329418 | 0.2297478 | -132.5983 | -0.2370463 | 0.4667942 | PON3     |
| cg03574571 | 0.5224782 | -159.1391 | -0.2370874 | 0.7595656 | CD22     |
| cg06001166 | 0.5859318 | -192.2447 | -0.2371503 | 0.8230821 | RPL3L    |
| cg23282949 | 0.4185149 | -132.724  | -0.2371507 | 0.6556656 | RENBP    |
| cg26385286 | 0.2353177 | -132.1433 | -0.2373458 | 0.4726635 | GCNT2    |
| cg15880738 | 0.4455484 | -137.6271 | -0.2373841 | 0.6829324 | CD3G     |
| cg11512771 | 0.5881056 | -194.2504 | -0.237404  | 0.8255095 | ECM1     |
| cg04387658 | 0.4462341 | -137.9075 | -0.2374988 | 0.6837329 | CD86     |
| cg05019001 | 0.2229036 | -134.148  | -0.2375229 | 0.4604265 | AR       |
| cg16825643 | 0.699752  | -329.0715 | -0.2376157 | 0.9373677 | FAM38A   |
| cg24147596 | 0.4160553 | -132.9838 | -0.237619  | 0.6536743 | ARL14    |
| cg10498097 | 0.4835549 | -146.9867 | -0.2376318 | 0.7211867 | MGC50811 |
| cg19764418 | 0.3261438 | -126.7173 | -0.2376392 | 0.563783  | RYR2     |
| cg14481339 | 0.570859  | -183.7696 | -0.2376775 | 0.8085364 | KCNJ1    |

|            |           |           |            |           |          |
|------------|-----------|-----------|------------|-----------|----------|
| cg02882813 | 0.5277486 | -162.2778 | -0.2376957 | 0.7654443 | CST5     |
| cg00690280 | 0.2693562 | -128.9836 | -0.2377626 | 0.5071188 | WFDC10B  |
| cg22510822 | 0.4064417 | -131.9059 | -0.237774  | 0.6442158 | OR1E2    |
| cg06066303 | 0.5691219 | -182.9417 | -0.2377752 | 0.8068971 | MS4A5    |
| cg19147390 | 0.150873  | -151.284  | -0.2381441 | 0.3890171 | UHRF1    |
| cg15626350 | 0.2293137 | -133.8737 | -0.2381483 | 0.467462  | ESR1     |
| cg15782391 | 0.330398  | -127.3493 | -0.2381606 | 0.5685586 | ACPT     |
| cg02504280 | 0.4490879 | -139.7356 | -0.2383831 | 0.6874709 | MAGEA12  |
| cg24546463 | 0.2240591 | -135.0899 | -0.238535  | 0.4625942 | MGC39715 |
| cg27337148 | 0.1979073 | -139.8605 | -0.2386472 | 0.4365545 | CAMK1G   |
| cg23152755 | 0.3202331 | -128.2711 | -0.2389782 | 0.5592114 | DEFB105A |
| cg07922606 | 0.2559739 | -131.545  | -0.2389823 | 0.4949563 | HIST1H3E |
| cg18530716 | 0.1016439 | -171.714  | -0.2393027 | 0.3409466 | SLC16A11 |
| cg15597540 | 0.6478311 | -254.3708 | -0.2393473 | 0.8871784 | CYB561D2 |
| cg21301440 | 0.102263  | -171.5141 | -0.2393711 | 0.3416341 | CYGB     |
| cg09548084 | 0.3385739 | -128.8916 | -0.2393774 | 0.5779514 | SLC35B3  |
| cg15480475 | 0.4822495 | -149.4742 | -0.239531  | 0.7217804 | TUB      |
| cg04520391 | 0.5076836 | -157.7403 | -0.2395849 | 0.7472685 | PRB2     |
| cg08124722 | 0.6013812 | -209.1899 | -0.2396583 | 0.8410395 | CCL7     |
| cg21434954 | 0.4062169 | -134.3227 | -0.2396808 | 0.6458977 | LCE1B    |
| cg24304714 | 0.197893  | -141.0727 | -0.239707  | 0.4376    | LCE1C    |
| cg24765079 | 0.2048484 | -139.7493 | -0.2397664 | 0.4446149 | CDH1     |
| cg23464269 | 0.3032053 | -129.4813 | -0.2398262 | 0.5430315 | UGT1A3   |

|            |            |           |            |           |           |
|------------|------------|-----------|------------|-----------|-----------|
| cg05654163 | 0.3906471  | -132.6999 | -0.239834  | 0.6304811 | SLC39A2   |
| cg15303841 | 0.3612736  | -130.3371 | -0.2398358 | 0.6011094 | RFPL1     |
| cg00476577 | 0.07721754 | -185.2461 | -0.2398411 | 0.3170587 | ZNF217    |
| cg13112511 | 0.3977872  | -133.6201 | -0.2399403 | 0.6377275 | PDE4D     |
| cg22445920 | 0.4071589  | -134.8285 | -0.2399781 | 0.647137  | SLC36A3   |
| cg23704362 | 0.3079583  | -129.5598 | -0.2399957 | 0.547954  | C8orf46   |
| cg00620024 | 0.4671641  | -146.2067 | -0.2400431 | 0.7072072 | PPP6C     |
| cg04675937 | 0.3920677  | -133.117  | -0.2400558 | 0.6321235 | CDKN2B    |
| cg03545635 | 0.5249546  | -165.2797 | -0.2401134 | 0.765068  | CHST12    |
| cg17926869 | 0.5311932  | -167.9664 | -0.2401245 | 0.7713177 | LOC115098 |
| cg19592945 | 0.1819195  | -145.1571 | -0.2402226 | 0.4221421 | P2RXL1    |
| cg02992596 | 0.3195022  | -130.1035 | -0.2405865 | 0.5600887 | MGC27016  |
| cg13053396 | 0.3967267  | -134.4087 | -0.2406505 | 0.6373771 | C1S       |
| cg06022562 | 0.5718797  | -190.593  | -0.2406955 | 0.8125752 | FLJ13841  |
| cg13461622 | 0.4071532  | -135.879  | -0.2407807 | 0.6479338 | RUNX3     |
| cg09283007 | 0.6633656  | -280.1976 | -0.2410003 | 0.9043659 | FAM47B    |
| cg09691574 | 0.5600638  | -184.1846 | -0.2410247 | 0.8010886 | MRGPRX4   |
| cg18729973 | 0.5047862  | -159.0988 | -0.2410406 | 0.7458268 | TFF1      |
| cg02579133 | 0.4319502  | -140.0711 | -0.2410456 | 0.6729958 | KRTAP10-8 |
| cg27050763 | 0.5729588  | -192.3416 | -0.2412054 | 0.8141642 | AHCTF1    |
| cg25882366 | 0.1431598  | -157.3698 | -0.2412474 | 0.3844072 | HOXB2     |
| cg09837803 | 0.2851827  | -131.9039 | -0.2412878 | 0.5264704 | IL16      |
| cg22220722 | 0.5321267  | -170.6396 | -0.2413808 | 0.7735075 | PLA2G2A   |

|            |           |           |            |           |          |
|------------|-----------|-----------|------------|-----------|----------|
| cg25391023 | 0.2853937 | -132.041  | -0.241427  | 0.5268207 | BTNL2    |
| cg00750606 | 0.2980546 | -131.4954 | -0.2414308 | 0.5394855 | CDA      |
| cg22294577 | 0.5628553 | -186.7822 | -0.2415203 | 0.8043756 | SLC26A3  |
| cg19841506 | 0.1060543 | -172.3891 | -0.2416064 | 0.3476608 | ZMYND15  |
| cg12858514 | 0.6423836 | -254.6782 | -0.2416702 | 0.8840538 | PADI3    |
| cg21643191 | 0.382506  | -134.3108 | -0.2417434 | 0.6242494 | ABCB5    |
| cg20261167 | 0.1709213 | -149.7455 | -0.2418589 | 0.4127803 | SPP1     |
| cg05826823 | 0.5794472 | -198.0465 | -0.2418872 | 0.8213344 | CIZ1     |
| cg26777475 | 0.3559102 | -132.6026 | -0.2419363 | 0.5978466 | PCOLCE   |
| cg16219122 | 0.2401309 | -136.6767 | -0.2419641 | 0.482095  | ABCB1    |
| cg09931793 | 0.4492289 | -144.793  | -0.2419701 | 0.6911989 | OR2K2    |
| cg08292050 | 0.5156402 | -165.278  | -0.2423093 | 0.7579495 | SOCS4    |
| cg22545356 | 0.492785  | -157.4779 | -0.2425773 | 0.7353623 | MMRN2    |
| cg05379350 | 0.1591785 | -154.1971 | -0.2428647 | 0.4020432 | GIT1     |
| cg09914304 | 0.5496357 | -182.4267 | -0.2430559 | 0.7926916 | PRF1     |
| cg27519140 | 0.3293664 | -133.0932 | -0.2430827 | 0.5724491 | RPP21    |
| cg26391080 | 0.4810144 | -154.6124 | -0.2430881 | 0.7241026 | SH2D4B   |
| cg13125510 | 0.2272897 | -139.7403 | -0.2431128 | 0.4704025 | C11orf44 |
| cg03224418 | 0.382649  | -136.1097 | -0.2431566 | 0.6258056 | SAMD10   |
| cg04273431 | 0.1457348 | -158.9377 | -0.2433335 | 0.3890684 | PRR3     |
| cg09222115 | 0.4273988 | -142.681  | -0.2435209 | 0.6709198 | OTOS     |
| cg15703357 | 0.3533623 | -134.4201 | -0.2435339 | 0.5968962 | LINCR    |
| cg24235633 | 0.5615892 | -190.5104 | -0.2437078 | 0.805297  | CDIPT    |



|            |            |           |            |           |           |
|------------|------------|-----------|------------|-----------|-----------|
| cg08970694 | 0.3618883  | -135.1786 | -0.243748  | 0.6056363 | HBE1      |
| cg22951794 | 0.5180748  | -168.8381 | -0.243807  | 0.7618818 | OR10A5    |
| cg06415153 | 0.3080952  | -134.0368 | -0.2438429 | 0.5519381 | PITPNM2   |
| cg14902389 | 0.4781199  | -155.0197 | -0.2438934 | 0.7220133 | MGAT4A    |
| cg20802392 | 0.2738272  | -135.5977 | -0.2439033 | 0.5177305 | CTSK      |
| cg05788638 | 0.4561056  | -149.2078 | -0.2439483 | 0.7000539 | SERPINA10 |
| cg05800321 | 0.5869646  | -208.5332 | -0.2441731 | 0.8311377 | LY6D      |
| cg08124399 | 0.4166882  | -141.7817 | -0.2441787 | 0.6608669 | DDX43     |
| cg20713492 | 0.08631485 | -185.5493 | -0.2443014 | 0.3306163 | AQP10     |
| cg26894575 | 0.3332873  | -134.6776 | -0.2443415 | 0.5776288 | S100A4    |
| cg06836849 | 0.1410907  | -161.8824 | -0.2445324 | 0.3856231 | SLC17A8   |
| cg07294541 | 0.07289106 | -193.6785 | -0.2446344 | 0.3175254 | DEF6      |
| cg15602735 | 0.4429653  | -147.4136 | -0.2447546 | 0.6877199 | MAGEC2    |
| cg11885098 | 0.148361   | -159.7339 | -0.2447663 | 0.3931274 | EFNA2     |
| cg18192417 | 0.1372264  | -163.5869 | -0.2448264 | 0.3820527 | NEBL      |
| cg26415633 | 0.2226629  | -142.5441 | -0.244953  | 0.4676159 | KLK1      |
| cg14036856 | 0.3176066  | -135.2825 | -0.244977  | 0.5625836 | MGC52423  |
| cg21209356 | 0.4424043  | -147.675  | -0.2450225 | 0.6874267 | CSF2RB    |
| cg11237817 | 0.3597212  | -136.6536 | -0.2450467 | 0.6047679 | KIR3DL3   |
| cg13552869 | 0.1528126  | -158.6886 | -0.2450763 | 0.3978889 | SEZ6L2    |
| cg08859675 | 0.3853339  | -139.2004 | -0.245357  | 0.6306909 | PDE4A     |
| cg01305625 | 0.2832461  | -136.7613 | -0.2454171 | 0.5286632 | PDLIM4    |
| cg14264994 | 0.6263599  | -247.8201 | -0.245614  | 0.8719739 | CTCF      |

|            |            |           |            |           |           |
|------------|------------|-----------|------------|-----------|-----------|
| cg18239253 | 0.3133829  | -136.2297 | -0.2457492 | 0.559132  | DEFB32    |
| cg03900284 | 0.4768418  | -157.7716 | -0.2459109 | 0.7227527 | P518      |
| cg11921829 | 0.4204593  | -144.7561 | -0.2459179 | 0.6663772 | FCRL2     |
| cg04143809 | 0.3258609  | -136.5431 | -0.2459913 | 0.5718522 | FLJ39822  |
| cg24866437 | 0.4815278  | -159.5102 | -0.2460989 | 0.7276267 | ALPK1     |
| cg14088161 | 0.2846384  | -137.5533 | -0.246161  | 0.5307994 | ACTL6B    |
| cg08459368 | 0.5495923  | -188.5321 | -0.2461758 | 0.7957681 | SCGB2A1   |
| cg21519900 | 0.2833906  | -137.633  | -0.2461759 | 0.5295665 | C20orf186 |
| cg24625388 | 0.2664174  | -138.92   | -0.2462992 | 0.5127165 | NEBL      |
| cg02064402 | 0.4828488  | -160.3575 | -0.2463695 | 0.7292182 | SLC6A18   |
| cg15374234 | 0.3403395  | -137.4352 | -0.2464551 | 0.5867946 | CD300LF   |
| cg10125195 | 0.4439254  | -150.1439 | -0.2465144 | 0.6904398 | LACRT     |
| cg15670863 | 0.4189311  | -145.3968 | -0.2465678 | 0.6654989 | SPACA4    |
| cg23022999 | 0.3910207  | -141.6309 | -0.2467279 | 0.6377487 | FLJ45909  |
| cg23641264 | 0.4482726  | -151.4765 | -0.2467526 | 0.6950252 | JRK       |
| cg00415993 | 0.2049654  | -147.6521 | -0.2467642 | 0.4517296 | F2RL2     |
| cg01474260 | 0.3521394  | -138.4444 | -0.2468573 | 0.5989967 | CESK1     |
| cg16381688 | 0.3022677  | -137.7227 | -0.2468697 | 0.5491374 | THEM2     |
| cg05730092 | 0.4984969  | -166.5998 | -0.2469399 | 0.7454368 | KIAA1446  |
| cg09914773 | 0.4815105  | -161.0144 | -0.2470409 | 0.7285514 | CYP3A4    |
| cg06385087 | 0.04161858 | -218.4979 | -0.2471612 | 0.2887798 | CTSZ      |
| cg17386181 | 0.4856004  | -162.8184 | -0.2473538 | 0.7329543 | MT1B      |
| cg14338548 | 0.5972776  | -224.6609 | -0.2474889 | 0.8447666 | LALBA     |

|            |           |           |            |           |         |
|------------|-----------|-----------|------------|-----------|---------|
| cg18473117 | 0.4504361 | -153.1171 | -0.2474991 | 0.6979352 | CCDC22  |
| cg15746187 | 0.4036401 | -144.3927 | -0.2475757 | 0.6512157 | FBXO44  |
| cg07947016 | 0.234233  | -143.9661 | -0.2476597 | 0.4818926 | KLK2    |
| cg22780475 | 0.333105  | -138.7844 | -0.2477307 | 0.5808358 | CBLC    |
| cg09551916 | 0.2814993 | -139.8656 | -0.2479966 | 0.529496  | CFHR2   |
| cg20692181 | 0.3672324 | -141.1284 | -0.2481628 | 0.6153951 | RETN    |
| cg13396068 | 0.4076138 | -145.8086 | -0.248189  | 0.6558028 | DCD     |
| cg15992730 | 0.288254  | -139.7651 | -0.2481918 | 0.5364458 | GDF3    |
| cg20795863 | 0.4466195 | -153.2715 | -0.2482128 | 0.6948323 | NEU2    |
| cg01361446 | 0.3757361 | -141.9837 | -0.2482457 | 0.6239817 | IL2RG   |
| cg21109025 | 0.4709354 | -159.7505 | -0.2482793 | 0.7192147 | CCL2    |
| cg27168844 | 0.3856453 | -143.5306 | -0.2486323 | 0.6342776 | IL17    |
| cg18807515 | 0.3732635 | -142.297  | -0.2486595 | 0.621923  | PRAMEF2 |
| cg15983538 | 0.4970742 | -169.132  | -0.2487548 | 0.745829  | SEMA4A  |
| cg26717133 | 0.242286  | -144.2108 | -0.2487572 | 0.4910431 | PCDH21  |
| cg00714377 | 0.1489242 | -164.4015 | -0.2489131 | 0.3978373 | SLA2    |
| cg05301852 | 0.3457112 | -140.7872 | -0.2489687 | 0.59468   | FABP1   |
| cg16673198 | 0.3885242 | -144.3308 | -0.2489964 | 0.6375206 | CPNE4   |
| cg19824441 | 0.3815079 | -143.6812 | -0.2491025 | 0.6306103 | ADMR    |
| cg08678755 | 0.4728641 | -161.634  | -0.2491088 | 0.7219729 | ENPP3   |
| cg25957124 | 0.2780446 | -141.4807 | -0.2491743 | 0.5272189 | DNAH3   |
| cg19971655 | 0.64571   | -282.2487 | -0.2492079 | 0.8949178 | BSND    |
| cg03548857 | 0.211842  | -149.293  | -0.2492765 | 0.4611185 | FFAR2   |

|            |           |           |            |           |          |
|------------|-----------|-----------|------------|-----------|----------|
| cg06958211 | 0.3480201 | -141.3655 | -0.2493413 | 0.5973614 | PAK6     |
| cg14034870 | 0.3343896 | -140.83   | -0.2493495 | 0.5837391 | SFTPG    |
| cg24654350 | 0.4624793 | -159.1151 | -0.2494017 | 0.711881  | KIR3DL1  |
| cg12781568 | 0.3072443 | -141.0727 | -0.2497227 | 0.556967  | WT1      |
| cg27065979 | 0.5565285 | -200.0897 | -0.2498108 | 0.8063393 | NEK3     |
| cg04740359 | 0.2395044 | -145.8182 | -0.2498553 | 0.4893597 | NTF3     |
| cg17034109 | 0.2553468 | -144.247  | -0.2500062 | 0.505353  | CYB561D1 |
| cg15756091 | 0.3998707 | -147.2093 | -0.2500554 | 0.6499261 | RGSL2    |
| cg08471713 | 0.5851701 | -220.9048 | -0.2500855 | 0.8352556 | MEOX1    |
| cg21458041 | 0.3755651 | -144.3805 | -0.2501015 | 0.6256666 | TNP2     |
| cg09142399 | 0.405891  | -148.165  | -0.2501118 | 0.6560028 | CRYZ     |
| cg18085517 | 0.2933047 | -141.9085 | -0.2501376 | 0.5434423 | TRPM1    |
| cg18849169 | 0.4481159 | -156.6142 | -0.2501913 | 0.6983072 | GPX3     |
| cg02688643 | 0.4661749 | -161.4134 | -0.2502055 | 0.7163805 | MGST2    |
| cg06142324 | 0.3838381 | -145.4952 | -0.2502879 | 0.634126  | FLJ25530 |
| cg21296676 | 0.2802268 | -142.7273 | -0.2503306 | 0.5305574 | EYA4     |
| cg18023080 | 0.4062259 | -148.5444 | -0.2503515 | 0.6565773 | MASP2    |
| cg17192247 | 0.1068949 | -182.7802 | -0.2504865 | 0.3573814 | MAPRE3   |
| cg16739580 | 0.3823623 | -145.622  | -0.250506  | 0.6328683 | POP2     |
| cg03291145 | 0.3937111 | -147.2896 | -0.2507397 | 0.6444508 | ARSF     |
| cg18750960 | 0.245819  | -146.1294 | -0.2507626 | 0.4965817 | HOXD4    |
| cg19421752 | 0.1489412 | -166.6313 | -0.2508005 | 0.3997418 | SLC6A18  |
| cg06985415 | 0.5961958 | -232.2014 | -0.2508682 | 0.847064  | C10orf39 |

|            |           |           |            |           |           |
|------------|-----------|-----------|------------|-----------|-----------|
| cg03741352 | 0.4840969 | -168.1162 | -0.2508923 | 0.7349892 | LCE3C     |
| cg19635695 | 0.2778809 | -143.6688 | -0.2510033 | 0.5288842 | PDE6C     |
| cg09626634 | 0.2882023 | -143.1572 | -0.2510097 | 0.539212  | EBI2      |
| cg10787197 | 0.3205899 | -142.7059 | -0.2510828 | 0.5716727 | C6orf105  |
| cg21023001 | 0.2544853 | -145.6347 | -0.2511191 | 0.5056044 | C1QR1     |
| cg06825166 | 0.2834806 | -143.6134 | -0.2512116 | 0.5346922 | TMEM10    |
| cg07373172 | 0.3858117 | -147.1981 | -0.2513972 | 0.6372089 | IFNA21    |
| cg12619162 | 0.5169925 | -182.4718 | -0.2516088 | 0.7686013 | FXYD4     |
| cg06818777 | 0.1050799 | -185.0173 | -0.251609  | 0.3566888 | CHAD      |
| cg05696092 | 0.2331221 | -148.7543 | -0.2516573 | 0.4847794 | NOSIP     |
| cg21130374 | 0.3142623 | -143.4709 | -0.2517165 | 0.5659788 | MX2       |
| cg06277277 | 0.2337974 | -148.769  | -0.2517502 | 0.4855476 | NR1I3     |
| cg24697329 | 0.4878142 | -170.8881 | -0.2517656 | 0.7395797 | ARHGEF4   |
| cg10300154 | 0.3738896 | -146.418  | -0.2517831 | 0.6256728 | MGC5297   |
| cg06821120 | 0.2494536 | -146.9798 | -0.25182   | 0.5012736 | RASSF1    |
| cg14107638 | 0.4244716 | -153.8756 | -0.2518499 | 0.6763214 | MAGEA5    |
| cg12629515 | 0.2278369 | -149.752  | -0.2518739 | 0.4797108 | HIST1H2BO |
| cg02280309 | 0.4064123 | -150.7424 | -0.2519127 | 0.658325  | PKLR      |
| cg10818781 | 0.3693992 | -146.228  | -0.2519622 | 0.6213614 | PHB2      |
| cg10432859 | 0.388385  | -148.2948 | -0.2519861 | 0.6403711 | UGT1A7    |
| cg20657421 | 0.4739642 | -166.6301 | -0.2520141 | 0.7259783 | CCL4      |
| cg01993576 | 0.1376941 | -172.0078 | -0.2520624 | 0.3897566 | SLC29A1   |
| cg00256074 | 0.5112333 | -180.9784 | -0.2521862 | 0.7634194 | MYLPF     |

|            |           |           |            |           |          |
|------------|-----------|-----------|------------|-----------|----------|
| cg14544583 | 0.2970167 | -144.3308 | -0.2522421 | 0.5492588 | HBB      |
| cg26155152 | 0.446862  | -159.539  | -0.2523296 | 0.6991917 | ZNF77    |
| cg11765205 | 0.136088  | -172.8933 | -0.2523311 | 0.3884191 | ARL11    |
| cg19096475 | 0.3694352 | -146.7324 | -0.2523366 | 0.6217718 | ASAM     |
| cg21789545 | 0.2233734 | -151.0431 | -0.2524047 | 0.475778  | COL9A1   |
| cg02097420 | 0.4029606 | -150.9409 | -0.2524491 | 0.6554097 | HRG      |
| cg20850981 | 0.567439  | -213.184  | -0.2524726 | 0.8199116 | ZNF323   |
| cg16998872 | 0.503002  | -178.0796 | -0.2525446 | 0.7555467 | GYPE     |
| cg16192029 | 0.6730579 | -337.0802 | -0.2525812 | 0.925639  | ANKRD7   |
| cg10210238 | 0.2020104 | -155.0739 | -0.2525983 | 0.4546087 | CDKN2B   |
| cg18986165 | 0.5445288 | -198.8182 | -0.2526736 | 0.7972023 | SIGLEC12 |
| cg15627025 | 0.6032982 | -243.5974 | -0.2527229 | 0.8560211 | KIR3DL1  |
| cg00371195 | 0.5182887 | -185.2461 | -0.2527658 | 0.7710544 | F2       |
| cg07471052 | 0.6531493 | -304.6597 | -0.2527781 | 0.9059274 | CDK3     |
| cg08453096 | 0.5730367 | -218.0541 | -0.2528557 | 0.8258924 | ABCG5    |
| cg27566805 | 0.2372499 | -149.7773 | -0.2529885 | 0.4902384 | USH2A    |
| cg00756887 | 0.4323953 | -157.306  | -0.2530658 | 0.685461  | PVRL4    |
| cg23894003 | 0.4339709 | -157.8132 | -0.2531915 | 0.6871625 | FBS1     |
| cg22585988 | 0.4331074 | -157.9962 | -0.2534388 | 0.6865462 | PVRL4    |
| cg15531099 | 0.2827344 | -146.418  | -0.2535197 | 0.5362542 | LCE1D    |
| cg25547939 | 0.5038506 | -180.3246 | -0.2535762 | 0.7574269 | VEGFB    |
| cg00269932 | 0.6429129 | -293.0196 | -0.2537166 | 0.8966295 | LAIR2    |
| cg12970084 | 0.4238267 | -156.9409 | -0.2540293 | 0.677856  | ELF3     |

|            |           |           |            |           |           |
|------------|-----------|-----------|------------|-----------|-----------|
| cg03973663 | 0.1778009 | -162.2247 | -0.254053  | 0.4318539 | LYN       |
| cg11003133 | 0.3084437 | -146.3555 | -0.2540583 | 0.562502  | AIM2      |
| cg17170504 | 0.3431727 | -147.2805 | -0.254204  | 0.5973768 | HSPC065   |
| cg11061975 | 0.292535  | -146.9032 | -0.2542445 | 0.5467796 | SIRPB2    |
| cg22247240 | 0.3545766 | -148.1197 | -0.2543222 | 0.6088988 | C14orf115 |
| cg10756887 | 0.17586   | -163.1331 | -0.254397  | 0.4302571 | C22orf15  |
| cg06489008 | 0.298704  | -147.1498 | -0.254586  | 0.55329   | CST11     |
| cg01469547 | 0.5554714 | -209.7718 | -0.2546248 | 0.8100963 | OR5P3     |
| cg06946880 | 0.4598412 | -166.6137 | -0.2546489 | 0.7144901 | ATP6V1B1  |
| cg11052143 | 0.1526964 | -170.0933 | -0.2546712 | 0.4073675 | ALS2CR11  |
| cg05985767 | 0.415     | -156.2583 | -0.2547208 | 0.6697208 | ANPEP     |
| cg19890739 | 0.4554051 | -165.4964 | -0.254743  | 0.7101481 | Pfs2      |
| cg24628744 | 0.149321  | -171.2776 | -0.2547508 | 0.4040718 | H2AFY     |
| cg20176648 | 0.2182727 | -154.7911 | -0.2548285 | 0.4731012 | AQP1      |
| cg08394377 | 0.42807   | -159.0038 | -0.2548371 | 0.6829071 | RIMS3     |
| cg06259570 | 0.3687991 | -149.988  | -0.2548638 | 0.6236629 | MMP27     |
| cg22855405 | 0.1590247 | -168.4159 | -0.2549037 | 0.4139284 | TINAGL1   |
| cg12493906 | 0.3041862 | -147.4454 | -0.2549134 | 0.5590996 | MMP26     |
| cg24818418 | 0.603891  | -250.1646 | -0.2549471 | 0.8588381 | EGF       |
| cg24429836 | 0.2048941 | -157.3401 | -0.2549679 | 0.459862  | LDHD      |
| cg13439299 | 0.5697222 | -220.6469 | -0.2550292 | 0.8247514 | DNAJC5G   |
| cg10248727 | 0.5555401 | -210.7799 | -0.255069  | 0.810609  | LCN1      |
| cg15423764 | 0.4011753 | -154.5832 | -0.2552068 | 0.6563821 | GLYAT     |

|            |           |           |            |           |           |
|------------|-----------|-----------|------------|-----------|-----------|
| cg22083047 | 0.2286583 | -153.6587 | -0.2552297 | 0.483888  | PRICKLE2  |
| cg09207718 | 0.311445  | -148.0943 | -0.2554663 | 0.5669113 | CYP1A2    |
| cg08356693 | 0.2835695 | -148.9575 | -0.2556447 | 0.5392143 | ITLN1     |
| cg00033773 | 0.53451   | -199.6853 | -0.2558874 | 0.7903975 | MORG1     |
| cg04457051 | 0.3489223 | -149.9082 | -0.2559904 | 0.6049128 | SCOC      |
| cg06720660 | 0.3472812 | -149.8761 | -0.2560412 | 0.6033224 | RNASE6    |
| cg03874127 | 0.4872675 | -178.2598 | -0.2561595 | 0.743427  | ARMC2     |
| cg00795812 | 0.135962  | -177.7542 | -0.256233  | 0.392195  | PDCD1     |
| cg06785429 | 0.2220495 | -155.9299 | -0.2562642 | 0.4783137 | DCUN1D1   |
| cg18565355 | 0.2042307 | -159.2096 | -0.2564237 | 0.4606544 | RBM35A    |
| cg13180098 | 0.385524  | -154.0818 | -0.256455  | 0.641979  | RHO       |
| cg15060813 | 0.2529652 | -152.1702 | -0.2564621 | 0.5094273 | LRFN3     |
| cg23580945 | 0.4933964 | -181.2465 | -0.2564725 | 0.7498689 | FLJ43826  |
| cg12654845 | 0.3867095 | -154.3438 | -0.2565289 | 0.6432385 | CLDN2     |
| cg25982743 | 0.1804704 | -164.547  | -0.2565446 | 0.437015  | TIMP4     |
| cg22228134 | 0.3244248 | -149.7009 | -0.2566245 | 0.5810493 | GZMH      |
| cg18565510 | 0.6542677 | -320.5371 | -0.2568153 | 0.911083  | CENTB5    |
| cg06353345 | 0.2657905 | -151.5303 | -0.2568645 | 0.522655  | OR51B4    |
| cg02706881 | 0.611258  | -263.5045 | -0.256933  | 0.8681911 | C21orf123 |
| cg00152644 | 0.5642594 | -221.0842 | -0.2569669 | 0.8212262 | SPRR2E    |
| cg24352688 | 0.3607013 | -152.2103 | -0.2570629 | 0.6177641 | OFD1      |
| cg25659818 | 0.3183608 | -150.1537 | -0.2570816 | 0.5754424 | CCL4      |
| cg21808053 | 0.2684898 | -151.6534 | -0.2571287 | 0.5256186 | DIRAS3    |



|            |            |           |            |           |          |
|------------|------------|-----------|------------|-----------|----------|
| cg27378216 | 0.3950092  | -156.442  | -0.257183  | 0.6521923 | SETBP1   |
| cg22456522 | 0.1806704  | -165.4804 | -0.2573619 | 0.4380323 | LILRB3   |
| cg15916061 | 0.2922589  | -150.8834 | -0.2574666 | 0.5497255 | SLC17A4  |
| cg15481539 | 0.5517882  | -213.6882 | -0.2575035 | 0.8092917 | DEFA5    |
| cg23595927 | 0.2654163  | -152.5922 | -0.2576953 | 0.5231116 | MYL5     |
| cg22971191 | 0.2590091  | -153.2219 | -0.2577669 | 0.516776  | SLC10A2  |
| cg02968557 | 0.5264727  | -199.325  | -0.2578936 | 0.7843664 | HSPB9    |
| cg02966851 | 0.2296483  | -156.774  | -0.2579099 | 0.4875581 | C6orf149 |
| cg00622552 | 0.1214863  | -185.5493 | -0.2579297 | 0.379416  | ODF3L1   |
| cg22909609 | 0.2440322  | -155.0217 | -0.2579843 | 0.5020164 | ITGBL1   |
| cg12374577 | 0.4177622  | -161.5847 | -0.2580035 | 0.6757657 | UGT2A3   |
| cg06614002 | 0.5825242  | -238.2831 | -0.2580208 | 0.840545  | SOX10    |
| cg14587868 | 0.3882876  | -156.6776 | -0.2580377 | 0.6463253 | TGM1     |
| cg05556202 | 0.4999642  | -186.807  | -0.2580551 | 0.7580193 | TM4SF19  |
| cg02124291 | 0.4511847  | -169.6582 | -0.25808   | 0.7092648 | OR7A5    |
| cg13434852 | 0.6016939  | -256.5412 | -0.2580939 | 0.8597878 | DOCK1    |
| cg26980692 | 0.1935644  | -163.4629 | -0.2581301 | 0.4516945 | SLC15A3  |
| cg16964535 | 0.6513815  | -320.5988 | -0.2581326 | 0.9095141 | DNAJC5G  |
| cg09492887 | 0.09012207 | -200.7354 | -0.2581365 | 0.3482586 | SLC26A5  |
| cg16446783 | 0.3969857  | -158.2406 | -0.2582435 | 0.6552292 | MRGPRX4  |
| cg20649991 | 0.477111   | -178.2    | -0.2582665 | 0.7353776 | LILRB5   |
| cg21717724 | 0.3233055  | -151.8034 | -0.2582953 | 0.5816008 | PSMD5    |
| cg20573420 | 0.6033525  | -258.9243 | -0.2583285 | 0.861681  | FLJ38451 |

|            |           |           |            |           |           |
|------------|-----------|-----------|------------|-----------|-----------|
| cg01772980 | 0.3656408 | -154.4096 | -0.2583301 | 0.6239709 | SCGB1D1   |
| cg24812523 | 0.3756594 | -155.5614 | -0.2583795 | 0.6340389 | AKAP6     |
| cg16777782 | 0.6436204 | -310.0086 | -0.2585308 | 0.9021512 | CDH13     |
| cg04254119 | 0.5590276 | -220.9576 | -0.2585472 | 0.8175747 | AKAP3     |
| cg22264436 | 0.4881913 | -183.141  | -0.2587015 | 0.7468928 | SOST      |
| cg14345676 | 0.3367259 | -153.2662 | -0.2590377 | 0.5957636 | HRH2      |
| cg03044435 | 0.5063699 | -191.5975 | -0.2590663 | 0.7654362 | FLJ35816  |
| cg16540704 | 0.523401  | -200.1323 | -0.2591123 | 0.7825133 | ASZ1      |
| cg24623694 | 0.1983321 | -163.7629 | -0.2592101 | 0.4575422 | PRX       |
| cg16377880 | 0.3379869 | -153.8532 | -0.2594252 | 0.5974121 | CYP4F3    |
| cg10883352 | 0.4129232 | -163.1245 | -0.2596801 | 0.6726032 |           |
| cg11811840 | 0.3627725 | -156.0568 | -0.2597218 | 0.6224942 | UGT1A1    |
| cg15669228 | 0.3269805 | -153.9901 | -0.2598702 | 0.5868507 | IFNA8     |
| cg24884084 | 0.1706301 | -171.1956 | -0.2598982 | 0.4305283 | SPRR1B    |
| cg22341310 | 0.1693448 | -171.6439 | -0.2599888 | 0.4293335 | ZNF541    |
| cg11787522 | 0.2771168 | -155.0676 | -0.2602692 | 0.5373861 | STRA6     |
| cg14942312 | 0.422022  | -165.8699 | -0.2602745 | 0.6822965 | GPR119    |
| cg15430659 | 0.452902  | -173.8247 | -0.2603494 | 0.7132514 | CNNM1     |
| cg12616487 | 0.4237459 | -166.6971 | -0.2605781 | 0.684324  | EML3      |
| cg19903229 | 0.2747543 | -155.6937 | -0.2606489 | 0.5354032 | C14orf105 |
| cg03557698 | 0.608444  | -271.4076 | -0.2607685 | 0.8692125 | C1orf177  |
| cg06436504 | 0.4088246 | -164.0249 | -0.2608162 | 0.6696407 | DOC1      |
| cg21312148 | 0.2696252 | -156.2913 | -0.2608776 | 0.5305029 | LCE2D     |

|            |           |           |            |           |          |
|------------|-----------|-----------|------------|-----------|----------|
| cg01120308 | 0.1164448 | -191.6553 | -0.2610619 | 0.3775067 | PICALM   |
| cg24237576 | 0.5282273 | -206.9176 | -0.2611052 | 0.7893326 | DNASE1L2 |
| cg08402568 | 0.3932329 | -161.8064 | -0.2611268 | 0.6543597 | MGC34647 |
| cg00311768 | 0.3580097 | -157.5502 | -0.2611521 | 0.6191617 | TSTA3    |
| cg14324675 | 0.348287  | -157.0583 | -0.261349  | 0.609636  | LST1     |
| cg10071275 | 0.3189432 | -156.0668 | -0.2615973 | 0.5805405 | MYT1     |
| cg25994725 | 0.3004022 | -156.0392 | -0.2616243 | 0.5620265 | C6orf81  |
| cg10159529 | 0.3996575 | -163.623  | -0.2616515 | 0.661309  | IL5RA    |
| cg07676849 | 0.3237547 | -156.5785 | -0.2619025 | 0.5856572 | FOLR3    |
| cg18129786 | 0.5479009 | -220.9745 | -0.2619662 | 0.8098671 | ZNF445   |
| cg17894008 | 0.5570477 | -227.5238 | -0.2619733 | 0.819021  | NACAL    |
| cg26353877 | 0.4914695 | -190.6994 | -0.2621084 | 0.7535778 | APCS     |
| cg12019109 | 0.3270956 | -157.0418 | -0.2621723 | 0.5892678 | AZGP1    |
| cg20322977 | 0.2431409 | -160.3095 | -0.2621808 | 0.5053217 | CYP26C1  |
| cg17405586 | 0.3774604 | -161.1872 | -0.2622471 | 0.6397075 | KRT1     |
| cg01031251 | 0.3499802 | -158.497  | -0.2623202 | 0.6123005 | RPS6KA1  |
| cg24840099 | 0.2982755 | -157.3619 | -0.2626455 | 0.5609211 | MSX1     |
| cg02989940 | 0.311698  | -157.3619 | -0.2626802 | 0.5743782 | ERAF     |
| cg17582777 | 0.3567047 | -159.5515 | -0.2626898 | 0.6193945 | EFNA3    |
| cg14162076 | 0.5668968 | -237.2731 | -0.2628566 | 0.8297534 | CLEC4D   |
| cg09425228 | 0.4075281 | -166.8524 | -0.2628839 | 0.6704121 | CCL20    |
| cg20399252 | 0.5988966 | -267.2025 | -0.2629012 | 0.8617978 | EBPL     |
| cg25214346 | 0.391118  | -164.2482 | -0.2630481 | 0.654166  | NR1I3    |

|            |           |           |            |           |          |
|------------|-----------|-----------|------------|-----------|----------|
| cg12943082 | 0.4812468 | -188.3428 | -0.2631178 | 0.7443646 | CCL26    |
| cg25915982 | 0.5126151 | -202.7966 | -0.263251  | 0.7758661 | GRB10    |
| cg06811800 | 0.4120362 | -168.3735 | -0.2632884 | 0.6753246 | ATP4B    |
| cg08495878 | 0.6010603 | -271.1706 | -0.2634914 | 0.8645517 | SERPINA4 |
| cg03294491 | 0.1636743 | -177.6901 | -0.2635203 | 0.4271945 | SMAD2    |
| cg04587829 | 0.3043205 | -158.5574 | -0.2636078 | 0.5679283 | FN3K     |
| cg08474603 | 0.4026768 | -167.0746 | -0.2636428 | 0.6663196 | CRP      |
| cg09528351 | 0.4277885 | -172.5147 | -0.2637101 | 0.6914986 | PIK3R5   |
| cg24698533 | 0.4192035 | -170.7447 | -0.2638364 | 0.6830398 | LYZL2    |
| cg00644033 | 0.6535878 | -345.9298 | -0.2639786 | 0.9175664 | MUC3B    |
| cg06810461 | 0.416425  | -170.4575 | -0.2640451 | 0.6804701 | AGRP     |
| cg05755354 | 0.2947246 | -159.3728 | -0.2641511 | 0.5588757 | FRMD4A   |
| cg14366490 | 0.3732537 | -163.5848 | -0.2643045 | 0.6375582 | TXNL6    |
| cg14550066 | 0.2696154 | -160.7108 | -0.2643758 | 0.5339913 | NCR1     |
| cg03752087 | 0.4214114 | -172.2636 | -0.2645043 | 0.6859157 | CASP14   |
| cg24489015 | 0.3302807 | -160.3095 | -0.2645249 | 0.5948056 | LPO      |
| cg07039113 | 0.5608988 | -236.7306 | -0.2645844 | 0.8254831 | S100A9   |
| cg00518911 | 0.249284  | -162.772  | -0.2646827 | 0.5139667 | HOXA10   |
| cg01036012 | 0.6059142 | -280.3795 | -0.2647408 | 0.8706549 | TUBB8    |
| cg19226099 | 0.2884741 | -160.4188 | -0.2648408 | 0.5533149 | MC3R     |
| cg20352371 | 0.3509021 | -162.1254 | -0.2649154 | 0.6158174 | PDZRN4   |
| cg20357806 | 0.4391527 | -177.5147 | -0.2649513 | 0.7041041 | PPBP     |
| cg11161873 | 0.2704292 | -161.5513 | -0.2650728 | 0.535502  | FLJ39575 |

|            |           |           |            |           |          |
|------------|-----------|-----------|------------|-----------|----------|
| cg07443748 | 0.3114133 | -160.5329 | -0.2650903 | 0.5765036 | CESK1    |
| cg01550148 | 0.2822922 | -161.0296 | -0.2651389 | 0.5474311 | H2AFY    |
| cg19111262 | 0.2588242 | -162.493  | -0.2651569 | 0.5239811 | IGSF9    |
| cg24309555 | 0.3606786 | -164.049  | -0.2656473 | 0.6263258 | APOB     |
| cg17095731 | 0.3772435 | -166.049  | -0.2656697 | 0.6429132 | LRP8     |
| cg14696870 | 0.3611942 | -164.1582 | -0.2656901 | 0.6268843 | FCER1A   |
| cg06851207 | 0.1817789 | -175.657  | -0.2657612 | 0.4475401 | FLJ10781 |
| cg24919884 | 0.3921971 | -168.4451 | -0.2657709 | 0.657968  | ARHGEF16 |
| cg15140807 | 0.4758484 | -191.1178 | -0.2657981 | 0.7416465 | FLJ31222 |
| cg04245402 | 0.2326841 | -166.1211 | -0.2658012 | 0.4984854 | C19orf21 |
| cg04968473 | 0.2919694 | -161.6147 | -0.2658303 | 0.5577998 | CYP1A2   |
| cg01072821 | 0.3624893 | -164.5552 | -0.2658773 | 0.6283666 | UNQ9391  |
| cg00071250 | 0.3403454 | -162.8461 | -0.2660013 | 0.6063467 | FASLG    |
| cg05955301 | 0.2446785 | -165.0489 | -0.2661064 | 0.5107849 | PRELP    |
| cg14620221 | 0.4798079 | -193.3193 | -0.2661356 | 0.7459434 | OR8B8    |
| cg07207789 | 0.328779  | -162.5331 | -0.2662339 | 0.5950129 | CRISPLD2 |
| cg09272256 | 0.3490272 | -163.9771 | -0.2663559 | 0.6153831 | AKR1C4   |
| cg10821722 | 0.6574079 | -348.7749 | -0.2663966 | 0.9238046 | MAP4K2   |
| cg18463686 | 0.2518802 | -164.9586 | -0.2666101 | 0.5184903 | CLEC5A   |
| cg19465374 | 0.5080917 | -207.6229 | -0.2667928 | 0.7748845 | AZGP1    |
| cg05190718 | 0.4295479 | -177.9907 | -0.2668292 | 0.696377  | CASQ2    |
| cg12552392 | 0.3544778 | -165.3413 | -0.2669983 | 0.6214761 | NFS1     |
| cg12732155 | 0.1942209 | -174.3994 | -0.2670596 | 0.4612805 | LAPTM5   |

|            |            |           |            |           |          |
|------------|------------|-----------|------------|-----------|----------|
| cg21754343 | 0.32732    | -163.6284 | -0.2670801 | 0.5944    | LCE2B    |
| cg15516226 | 0.5310134  | -221.4043 | -0.2671255 | 0.7981389 | BTNL9    |
| cg12113132 | 0.2803669  | -163.798  | -0.2672217 | 0.5475886 | CCNDBP1  |
| cg13883681 | 0.2399462  | -167.0286 | -0.267244  | 0.5071902 | GOT2     |
| cg27257987 | 0.3797505  | -168.731  | -0.2672704 | 0.6470209 | PSG4     |
| cg04962134 | 0.3327641  | -164.1511 | -0.267277  | 0.600041  | TRIM51   |
| cg18533225 | 0.4219054  | -176.9467 | -0.2673504 | 0.6892558 | KLHDC7B  |
| cg07072643 | 0.2930062  | -163.7731 | -0.2674938 | 0.5605    | EMR3     |
| cg01663968 | 0.07585751 | -221.3183 | -0.2676601 | 0.3435176 | CTSZ     |
| cg08555657 | 0.4771605  | -195.2368 | -0.2677554 | 0.7449159 | SPRR2E   |
| cg00436603 | 0.2807162  | -164.6373 | -0.2678827 | 0.5485989 | CYP2E1   |
| cg07531356 | 0.392355   | -172.0219 | -0.2681336 | 0.6604886 | INSL6    |
| cg09748975 | 0.4745896  | -194.9207 | -0.2681431 | 0.7427327 | MSX1     |
| cg14414534 | 0.6233838  | -313.3767 | -0.2681764 | 0.8915602 | TMOD1    |
| cg08887581 | 0.4280819  | -179.8463 | -0.2681815 | 0.6962634 | C1orf64  |
| cg24888049 | 0.189629   | -177.0115 | -0.2682895 | 0.4579185 | FES      |
| cg10837843 | 0.08302791 | -217.9225 | -0.2683011 | 0.351329  | DUSP1    |
| cg06906435 | 0.2675507  | -166.2255 | -0.2685626 | 0.5361133 | FLJ25773 |
| cg02717866 | 0.3828449  | -171.1732 | -0.2685947 | 0.6514395 | FLJ32771 |
| cg18056600 | 0.09626582 | -211.1541 | -0.2686744 | 0.3649402 | ZMYND15  |
| cg03712237 | 0.5152676  | -215.4133 | -0.2686816 | 0.7839491 | SSX2     |
| cg00350478 | 0.3358716  | -166.4469 | -0.268807  | 0.6046786 | FRMD1    |
| cg00623593 | 0.6152242  | -304.6285 | -0.2688596 | 0.8840837 | DOCK1    |

|            |           |           |            |           |           |
|------------|-----------|-----------|------------|-----------|-----------|
| cg24642820 | 0.4458232 | -186.2722 | -0.2690049 | 0.714828  | NUP210    |
| cg07977490 | 0.419591  | -179.4391 | -0.2692386 | 0.6888297 | C16orf45  |
| cg15560337 | 0.4825774 | -200.3478 | -0.2692816 | 0.7518591 | HYAL4     |
| cg16391792 | 0.4862956 | -202.0144 | -0.269289  | 0.7555845 | LIPC      |
| cg09458237 | 0.4247538 | -181.2179 | -0.2695282 | 0.694282  | HSPA12B   |
| cg18490846 | 0.2563291 | -168.4573 | -0.2696337 | 0.5259629 | C17orf73  |
| cg16242770 | 0.4925787 | -205.6065 | -0.2696422 | 0.7622209 | KRTAP17-1 |
| cg06531741 | 0.2660533 | -167.9032 | -0.2697713 | 0.5358245 | HTR3B     |
| cg01484156 | 0.2803335 | -167.1496 | -0.2697912 | 0.5501247 | NCALD     |
| cg05670596 | 0.2179748 | -173.4391 | -0.2698414 | 0.4878161 | CCRL2     |
| cg19000186 | 0.3986985 | -176.0467 | -0.2699675 | 0.668666  | CNGA1     |
| cg16016036 | 0.5619254 | -251.0972 | -0.270018  | 0.8319434 | TPO       |
| cg11070419 | 0.2778617 | -167.75   | -0.2701516 | 0.5480133 | C4BPA     |
| cg10052840 | 0.2249369 | -172.8146 | -0.2701882 | 0.4951251 | SEMA6B    |
| cg15447486 | 0.4318113 | -184.222  | -0.2702301 | 0.7020414 | GPR109B   |
| cg02130905 | 0.3364677 | -168.5984 | -0.2703236 | 0.6067913 | STMN4     |
| cg12188416 | 0.2293814 | -172.548  | -0.2704749 | 0.4998563 | TP73L     |
| cg09555879 | 0.510716  | -216.6634 | -0.2704886 | 0.7812046 | GRIK5     |
| cg11435943 | 0.2486187 | -170.4448 | -0.270596  | 0.5192146 | SERPINB12 |
| cg24387818 | 0.2096477 | -175.9198 | -0.2706122 | 0.48026   | POF1B     |
| cg19242268 | 0.2711027 | -168.7517 | -0.2706534 | 0.541756  | TCEA2     |
| cg04457794 | 0.5119018 | -217.8939 | -0.2707668 | 0.7826686 | CTSE      |
| cg09076584 | 0.3999365 | -177.9558 | -0.27104   | 0.6709765 | FLJ25006  |

|            |            |           |            |           |           |
|------------|------------|-----------|------------|-----------|-----------|
| cg26504906 | 0.2113923  | -176.61   | -0.2713901 | 0.4827824 | PRSS16    |
| cg12639234 | 0.2864751  | -169.1545 | -0.2714374 | 0.5579125 | NAT2      |
| cg02601403 | 0.4978174  | -212.038  | -0.2715607 | 0.7693781 | TBC1D3C   |
| cg09467501 | 0.1005493  | -212.8221 | -0.2715639 | 0.3721131 | PYY       |
| cg10464775 | 0.3997396  | -178.7914 | -0.2715966 | 0.6713361 | LAMP1     |
| cg26822241 | 0.4263318  | -185.0558 | -0.2716095 | 0.6979414 | CYP2C9    |
| cg22970435 | 0.08716162 | -220.0847 | -0.2716898 | 0.3588514 | SPATS1    |
| cg21624282 | 0.5265132  | -228.8622 | -0.2717234 | 0.7982366 | LOC122258 |
| cg05564657 | 0.6084296  | -305.0659 | -0.2717645 | 0.880194  | AADAC     |
| cg17699374 | 0.1891924  | -181.7114 | -0.2718365 | 0.4610289 | MGC35206  |
| cg01785568 | 0.2787494  | -170.0277 | -0.2718783 | 0.5506277 | MSX1      |
| cg13474734 | 0.4721592  | -200.8882 | -0.2718818 | 0.7440411 | FLJ43339  |
| cg17500962 | 0.3914953  | -177.6756 | -0.2718844 | 0.6633798 | C16orf47  |
| cg05636175 | 0.1582367  | -190.0912 | -0.2719131 | 0.4301497 | TNFRSF10C |
| cg18434152 | 0.4167968  | -183.2372 | -0.271999  | 0.6887958 | PROK1     |
| cg24489034 | 0.4189426  | -183.9212 | -0.2720881 | 0.6910307 | LW-1      |
| cg16268563 | 0.4318684  | -187.3724 | -0.2720946 | 0.703963  | ATP6V1G2  |
| cg01861509 | 0.4052117  | -180.863  | -0.2721553 | 0.6773669 | SPOCK2    |
| cg04189838 | 0.4480734  | -192.6556 | -0.2722377 | 0.7203111 | CYP2C19   |
| cg16792160 | 0.286668   | -170.3067 | -0.2722775 | 0.5589455 | ASAH2     |
| cg15741706 | 0.4226702  | -185.3895 | -0.2723919 | 0.6950621 | CXorf48   |
| cg21283680 | 0.3780369  | -176.281  | -0.2724587 | 0.6504956 | SH3BP5    |
| cg00601486 | 0.6200342  | -323.9055 | -0.2727015 | 0.8927357 | H1T2      |



|                |           |           |            |           |           |
|----------------|-----------|-----------|------------|-----------|-----------|
| cg0971567<br>2 | 0.1938746 | -181.8201 | -0.2727247 | 0.4665993 | C10orf116 |
| cg0068767<br>4 | 0.2005213 | -180.5307 | -0.2728021 | 0.4733233 | TMEM84    |
| cg1774157<br>2 | 0.5241007 | -230.0571 | -0.2729389 | 0.7970396 | CFB       |
| cg2732937<br>1 | 0.2790008 | -171.642  | -0.2730939 | 0.5520948 | ALDH3A1   |
| cg1938469<br>7 | 0.227472  | -176.2999 | -0.2731118 | 0.5005838 | UPK3B     |
| cg1809828<br>6 | 0.3532396 | -174.2865 | -0.2732823 | 0.6265219 | UGT1A10   |
| cg2104410<br>4 | 0.3347231 | -172.8777 | -0.2734283 | 0.6081514 | LYZL4     |
| cg2692220<br>2 | 0.3205391 | -172.1947 | -0.2734801 | 0.5940192 | OR2S2     |
| cg2514199<br>5 | 0.246901  | -174.4577 | -0.2735152 | 0.5204162 | VDAC1     |
| cg1537985<br>8 | 0.6152232 | -321.5026 | -0.2740132 | 0.8892364 | ChGn      |
| cg1396012<br>6 | 0.3668105 | -177.6384 | -0.2744171 | 0.6412276 | CRB3      |
| cg2464246<br>8 | 0.243867  | -176.0751 | -0.2744782 | 0.5183452 | MGC33367  |
| cg1838981<br>0 | 0.5668723 | -267.6636 | -0.2745928 | 0.8414651 | C14orf8   |
| cg0385407<br>1 | 0.6465315 | -348.7749 | -0.2748145 | 0.9213461 | NDUFA13   |
| cg1328186<br>8 | 0.3865    | -181.8766 | -0.2751407 | 0.6616407 | C6orf142  |
| cg0999585<br>4 | 0.396209  | -183.7418 | -0.2751445 | 0.6713535 | IL1F8     |
| cg1720455<br>7 | 0.4483218 | -198.0793 | -0.2752447 | 0.7235665 | FLJ14816  |
| cg1281113<br>5 | 0.6041667 | -311.1307 | -0.2753757 | 0.8795425 | FLJ25369  |
| cg0281312<br>1 | 0.5510908 | -255.8511 | -0.2754324 | 0.8265232 | S100A12   |
| cg1067714<br>4 | 0.4356591 | -194.5521 | -0.2755885 | 0.7112477 | MYOM1     |
| cg0022692<br>3 | 0.4878011 | -215.4533 | -0.275713  | 0.7635141 | FGD2      |
| cg2247861<br>4 | 0.2827209 | -175.1158 | -0.275718  | 0.5584389 | DEFB4     |
| cg1772023<br>3 | 0.3869389 | -183.0923 | -0.2758657 | 0.6628047 | TNFAIP8L2 |

|            |           |           |            |           |          |
|------------|-----------|-----------|------------|-----------|----------|
| cg23278885 | 0.4291568 | -193.2157 | -0.2759313 | 0.7050881 | TGM6     |
| cg24910675 | 0.1380422 | -202.4209 | -0.2760689 | 0.4141111 | ENG      |
| cg13521229 | 0.2769772 | -175.9174 | -0.2761424 | 0.5531197 | JOSD2    |
| cg21825364 | 0.6334008 | -348.7749 | -0.2765951 | 0.9099959 | VCY      |
| cg10334928 | 0.5543331 | -261.8444 | -0.2766593 | 0.8309923 | STON2    |
| cg22762309 | 0.4616982 | -206.1234 | -0.276868  | 0.7385662 | OTUD6A   |
| cg10368842 | 0.3391127 | -178.5051 | -0.2770415 | 0.6161542 | C10orf81 |
| cg16463460 | 0.2043725 | -185.4626 | -0.2771217 | 0.4814942 | WT1      |
| cg07193504 | 0.3392852 | -178.649  | -0.2771287 | 0.6164138 | SRP9     |
| cg04337944 | 0.2011278 | -186.6851 | -0.2775713 | 0.4786991 | FBLN1    |
| cg27160701 | 0.30349   | -177.6126 | -0.2776021 | 0.5810921 | SBEM     |
| cg05254747 | 0.4621343 | -207.7363 | -0.2776291 | 0.7397634 | SLC39A14 |
| cg24693053 | 0.192662  | -188.6788 | -0.2777409 | 0.4704029 | MFSD7    |
| cg23324787 | 0.3393727 | -179.747  | -0.2778433 | 0.617216  | RAG2     |
| cg15210427 | 0.2369719 | -181.4283 | -0.2778605 | 0.5148324 | CST9L    |
| cg18783781 | 0.4928145 | -222.6393 | -0.2779713 | 0.7707858 | MGC4399  |
| cg18223379 | 0.2411609 | -181.3391 | -0.2781435 | 0.5193044 | BPIL3    |
| cg26928682 | 0.5305565 | -246.6617 | -0.2781646 | 0.8087211 | TREML2   |
| cg26790059 | 0.4652608 | -210.3069 | -0.2782958 | 0.7435566 | MGC27121 |
| cg18204685 | 0.4075817 | -191.8021 | -0.2785072 | 0.686089  | BTD      |
| cg26264314 | 0.4707078 | -213.52   | -0.2787257 | 0.7494335 | NALP5    |
| cg16020904 | 0.4284619 | -197.9989 | -0.2788007 | 0.7072626 | SPATA20  |
| cg24825722 | 0.3168913 | -179.747  | -0.2788262 | 0.5957175 | ACADVL   |

|            |           |           |            |           |          |
|------------|-----------|-----------|------------|-----------|----------|
| cg04655481 | 0.4230804 | -196.6279 | -0.2789128 | 0.7019932 | GPR21    |
| cg16358738 | 0.4454297 | -203.9704 | -0.2790205 | 0.7244502 | AGXT     |
| cg26628847 | 0.2255951 | -184.539  | -0.2790701 | 0.5046653 | PIP      |
| cg11346450 | 0.4475769 | -205.0995 | -0.2792021 | 0.726779  | UGT1A3   |
| cg14511156 | 0.2132646 | -186.8547 | -0.2793763 | 0.4926409 | OSCAR    |
| cg19201019 | 0.4817283 | -219.9749 | -0.2793966 | 0.7611248 | B3GALT7  |
| cg16626670 | 0.3663262 | -185.9766 | -0.2798799 | 0.6462061 | CLEC4G   |
| cg19481686 | 0.3499645 | -183.8515 | -0.279885  | 0.6298494 | CDKN2B   |
| cg16356516 | 0.5516476 | -268.1291 | -0.2799428 | 0.8315904 | EXOSC6   |
| cg01325515 | 0.5108501 | -237.5609 | -0.2799757 | 0.7908258 | CTAG2    |
| cg19241311 | 0.3127278 | -181.4185 | -0.2800826 | 0.5928104 | DEFB123  |
| cg04431776 | 0.5219554 | -245.3951 | -0.2801816 | 0.802137  | GAGE2    |
| cg07017706 | 0.4370141 | -203.569  | -0.2803862 | 0.7174003 | K6IRS3   |
| cg05810550 | 0.4301205 | -201.3738 | -0.2804131 | 0.7105336 | DEFB106A |
| cg06145357 | 0.3998028 | -193.2157 | -0.2804367 | 0.6802394 | MAGEA8   |
| cg20622019 | 0.4627329 | -213.7105 | -0.280598  | 0.7433308 | ADA      |
| cg01443630 | 0.5292528 | -251.6591 | -0.2806314 | 0.8098843 | CLCN7    |
| cg20676303 | 0.5985171 | -321.3517 | -0.2807832 | 0.8793003 | GAGE7B   |
| cg14652095 | 0.2302759 | -186.2722 | -0.2808143 | 0.5110902 | HIST1H1A |
| cg18809535 | 0.5640552 | -282.3948 | -0.2808743 | 0.8449295 | LDHAL6B  |
| cg17974185 | 0.2800422 | -182.4239 | -0.2808802 | 0.5609224 | CTNBL1   |
| cg22772878 | 0.180457  | -196.0449 | -0.2810627 | 0.4615197 | DIRAS1   |
| cg13758677 | 0.4682764 | -217.1134 | -0.2811027 | 0.7493791 | GAGE4    |

|            |            |           |            |           |           |
|------------|------------|-----------|------------|-----------|-----------|
| cg03517000 | 0.4679686  | -218.0195 | -0.2816354 | 0.749604  | GSTA2     |
| cg10938286 | 0.563175   | -283.8617 | -0.28171   | 0.844885  | CST2      |
| cg18396533 | 0.1371744  | -210.4338 | -0.2817587 | 0.4189331 | DYDC1     |
| cg23131950 | 0.4402527  | -208.0591 | -0.2822071 | 0.7224598 | AP2S1     |
| cg01970325 | 0.2555624  | -185.8101 | -0.2823845 | 0.5379469 | NELF      |
| cg21275690 | 0.2406928  | -187.37   | -0.2825241 | 0.5232169 | WDR58     |
| cg06827038 | 0.367606   | -190.4317 | -0.2825595 | 0.6501654 | WFIKKN2   |
| cg15996947 | 0.3350675  | -186.4482 | -0.2825771 | 0.6176445 | L2HGDH    |
| cg24027679 | 0.4933456  | -232.9866 | -0.2826183 | 0.7759639 | SLC2A7    |
| cg00896220 | 0.4218163  | -202.9255 | -0.2827085 | 0.7045248 | CCL4L2    |
| cg00520135 | 0.5727528  | -296.9166 | -0.2827659 | 0.8555187 | TPM1      |
| cg23829949 | 0.2983484  | -185.4104 | -0.2830752 | 0.5814235 | ZNF238    |
| cg19756068 | 0.3499673  | -188.8913 | -0.2831609 | 0.6331282 | CYP2B6    |
| cg08886154 | 0.2624986  | -186.4456 | -0.2831836 | 0.5456822 | PAX4      |
| cg00895324 | 0.4227516  | -204.2795 | -0.28331   | 0.7060616 | PCP4      |
| cg13019092 | 0.4493848  | -213.7025 | -0.2833937 | 0.7327785 | PDZK1     |
| cg24430616 | 0.3372833  | -188.0298 | -0.2834853 | 0.6207685 | ENTPD4    |
| cg08996986 | 0.3946352  | -197.1626 | -0.2834912 | 0.6781263 | EPS8L1    |
| cg07126559 | 0.4754681  | -226.1104 | -0.2838418 | 0.7593099 | SGCG      |
| cg08424423 | 0.5169744  | -250.7868 | -0.283903  | 0.8008775 | CDSN      |
| cg27090216 | 0.07403571 | -245.0354 | -0.2840547 | 0.3580904 | TNFRSF10C |
| cg03544379 | 0.2082117  | -194.2422 | -0.2841081 | 0.4923198 | OR7C2     |
| cg05093686 | 0.19253    | -197.3833 | -0.2841108 | 0.4766409 | MAB21L1   |

|            |           |           |            |           |           |
|------------|-----------|-----------|------------|-----------|-----------|
| cg03169180 | 0.34089   | -189.4122 | -0.284142  | 0.625032  | NLGN2     |
| cg05559445 | 0.1945909 | -197.4358 | -0.2844748 | 0.4790657 | CDKN1C    |
| cg07595943 | 0.632269  | -348.7749 | -0.2845235 | 0.9167925 | LOC161931 |
| cg07339138 | 0.288756  | -187.5802 | -0.2845972 | 0.5733532 | CCDC13    |
| cg00501366 | 0.3043773 | -187.7618 | -0.2846103 | 0.5889876 | ALOX12B   |
| cg26111757 | 0.4034189 | -201.363  | -0.2847139 | 0.6881328 | C20orf185 |
| cg15005385 | 0.2844271 | -188.0111 | -0.284863  | 0.56929   | CCL3L1    |
| cg27513764 | 0.3786214 | -196.1573 | -0.2848996 | 0.6635211 | EFCAB3    |
| cg18780284 | 0.396364  | -200.1506 | -0.2850296 | 0.6813936 | SPRR1B    |
| cg21505334 | 0.4449533 | -215.2579 | -0.2850858 | 0.7300391 | CEACAM5   |
| cg18219418 | 0.4494605 | -217.0393 | -0.2851037 | 0.7345642 | PARP6     |
| cg22194129 | 0.3040097 | -188.6096 | -0.2851887 | 0.5891984 | CLEC4C    |
| cg22253945 | 0.4985378 | -242.0048 | -0.2852765 | 0.7838143 | GPR45     |
| cg02311163 | 0.3306396 | -190.375  | -0.2853699 | 0.6160095 | SEMG2     |
| cg12554476 | 0.4005704 | -202.0862 | -0.2855479 | 0.6861182 | GP2       |
| cg13259290 | 0.4400573 | -214.4258 | -0.2856266 | 0.7256839 | CSF2      |
| cg11984608 | 0.511614  | -251.2101 | -0.2856354 | 0.7972494 | CLDN16    |
| cg20047055 | 0.3809481 | -198.1297 | -0.2858366 | 0.6667847 | KLRC1     |
| cg08878744 | 0.2294291 | -193.4751 | -0.2859084 | 0.5153375 | LCE1B     |
| cg26523005 | 0.261979  | -190.7536 | -0.2861734 | 0.5481524 | ZNF662    |
| cg17240454 | 0.5137714 | -254.0707 | -0.2861901 | 0.7999614 | SPDEF     |
| cg25531166 | 0.4800046 | -233.9593 | -0.2864294 | 0.766434  | CTAG1B    |
| cg17051440 | 0.3726527 | -197.8495 | -0.2866014 | 0.6592541 | CLDN2     |

|            |            |           |            |           |          |
|------------|------------|-----------|------------|-----------|----------|
| cg01507173 | 0.3475056  | -194.1785 | -0.2867039 | 0.6342095 | IL1F5    |
| cg24477636 | 0.2754288  | -190.982  | -0.2867494 | 0.5621782 | OR10H1   |
| cg11750883 | 0.272415   | -191.2468 | -0.286862  | 0.5592771 | C1orf42  |
| cg07879977 | 0.2381216  | -193.8477 | -0.2869206 | 0.5250422 | OR1F1    |
| cg14117297 | 0.2381546  | -193.9614 | -0.2870043 | 0.5251589 | MGC23244 |
| cg13126790 | 0.3927585  | -202.7717 | -0.2870359 | 0.6797944 | FLJ27255 |
| cg05112299 | 0.2110282  | -197.8973 | -0.2870872 | 0.4981154 | OR7A17   |
| cg26063872 | 0.3553148  | -195.8396 | -0.2870894 | 0.6424041 | DEFB123  |
| cg07026910 | 0.4373119  | -216.2631 | -0.2871168 | 0.7244287 | INPP5D   |
| cg02192965 | 0.4033369  | -205.6024 | -0.2871362 | 0.690473  | SLC3A1   |
| cg23244913 | 0.08041057 | -245.63   | -0.2872761 | 0.3676866 | HCG9     |
| cg07525077 | 0.2865863  | -191.6073 | -0.2873208 | 0.5739071 | RNASE3   |
| cg01442426 | 0.4813456  | -236.8736 | -0.2874407 | 0.7687863 | XCR1     |
| cg06736444 | 0.2546618  | -193.0956 | -0.2874486 | 0.5421104 | SRRM2    |
| cg27020690 | 0.06568517 | -255.3986 | -0.2875087 | 0.3531938 | TERC     |
| cg13608094 | 0.5766066  | -315.6033 | -0.2875227 | 0.8641294 | CCND1    |
| cg09027725 | 0.3415252  | -195.2816 | -0.2878439 | 0.6293691 | COX4I2   |
| cg15422147 | 0.4002661  | -206.6707 | -0.2881874 | 0.6884536 | SERPINB5 |
| cg04739485 | 0.3302805  | -195.07   | -0.2884274 | 0.618708  | MLXIP    |
| cg22088368 | 0.245225   | -195.3396 | -0.2884772 | 0.5337022 | MGC35206 |
| cg27291231 | 0.4060988  | -209.1233 | -0.2886999 | 0.6947987 | SSNA1    |
| cg12391921 | 0.3254905  | -195.4158 | -0.2889148 | 0.6144053 | ITGB1BP2 |
| cg18766847 | 0.345991   | -197.7215 | -0.2890399 | 0.6350309 | ACMSD    |

|            |            |           |            |           |          |
|------------|------------|-----------|------------|-----------|----------|
| cg00718513 | 0.196113   | -203.6907 | -0.2891917 | 0.4853047 |          |
| cg21372914 | 0.424763   | -215.9105 | -0.2892652 | 0.7140282 | CLEC4M   |
| cg25552889 | 0.5020998  | -254.1977 | -0.2895663 | 0.7916662 | C3orf40  |
| cg06437862 | 0.4705487  | -235.8024 | -0.2895817 | 0.7601305 | TUBA2    |
| cg08314660 | 0.5579651  | -301.8652 | -0.2897904 | 0.8477555 | PKP3     |
| cg26705561 | 0.2526331  | -196.6723 | -0.2898253 | 0.5424584 | SEC31L2  |
| cg15903395 | 0.3649577  | -202.1404 | -0.2900175 | 0.6549752 | FLJ25369 |
| cg26189983 | 0.06063579 | -262.6922 | -0.2901096 | 0.3507454 | TNFRSF1B |
| cg03104936 | 0.3481472  | -199.7745 | -0.2901464 | 0.6382935 | GRB10    |
| cg14297029 | 0.5513822  | -296.7888 | -0.2903346 | 0.8417169 | SSTR3    |
| cg06275635 | 0.2684315  | -196.6169 | -0.2904112 | 0.5588427 | PGLYRP3  |
| cg10213812 | 0.5723678  | -320.4406 | -0.2906434 | 0.8630112 | FOXN1    |
| cg09546307 | 0.3836251  | -207.1632 | -0.2907714 | 0.6743965 | CLEC4D   |
| cg12970081 | 0.2848725  | -196.8374 | -0.2908257 | 0.5756982 | GPR32    |
| cg18242139 | 0.4225373  | -218.1394 | -0.2908734 | 0.7134107 | ELAVL4   |
| cg07790638 | 0.3681438  | -204.1952 | -0.290905  | 0.6590487 | LOC91431 |
| cg24765446 | 0.3292072  | -199.1071 | -0.2910689 | 0.6202761 | WFDC6    |
| cg22937320 | 0.4164319  | -216.6121 | -0.2910962 | 0.7075281 | C9orf138 |
| cg03364781 | 0.3899066  | -209.453  | -0.2912555 | 0.6811622 | ALPK1    |
| cg09299388 | 0.4058265  | -213.692  | -0.2912609 | 0.6970874 | PGK2     |
| cg10746737 | 0.4138977  | -216.1605 | -0.2912852 | 0.7051829 | HLA-DRB5 |
| cg08815403 | 0.2833803  | -197.5639 | -0.2913038 | 0.5746841 | HSD17B13 |
| cg04705866 | 0.4023625  | -213.1093 | -0.2914674 | 0.6938299 | GZMK     |

|            |           |           |            |           |          |
|------------|-----------|-----------|------------|-----------|----------|
| cg23889010 | 0.273544  | -198.0577 | -0.2915275 | 0.5650716 | SLPI     |
| cg02844051 | 0.444601  | -228.0187 | -0.2916336 | 0.7362346 | ZD52F10  |
| cg27132814 | 0.3040837 | -198.6369 | -0.2918154 | 0.5958991 | C20orf79 |
| cg14960043 | 0.1145439 | -234.0244 | -0.2918294 | 0.4063734 | DEF6     |
| cg00321478 | 0.3645331 | -205.3564 | -0.2919638 | 0.6564969 | CRB1     |
| cg21885995 | 0.3278359 | -200.4066 | -0.2919695 | 0.6198054 | SRP68    |
| cg08684473 | 0.456141  | -234.4062 | -0.2922423 | 0.7483833 | LILRB5   |
| cg24735937 | 0.3776745 | -208.5378 | -0.292318  | 0.6699926 | CLTB     |
| cg22340747 | 0.3972309 | -213.8742 | -0.2926865 | 0.6899173 | GATM     |
| cg02184413 | 0.3759092 | -208.9536 | -0.2927763 | 0.6686856 | VNN1     |
| cg25043279 | 0.392754  | -213.0235 | -0.2928424 | 0.6855964 | C7orf33  |
| cg24607398 | 0.2289655 | -203.4643 | -0.2928538 | 0.5218193 | MLH1     |
| cg24355048 | 0.3444321 | -203.9586 | -0.2930084 | 0.6374406 | CTSG     |
| cg26581729 | 0.1594657 | -218.7068 | -0.2931616 | 0.4526273 | NPDC1    |
| cg08157292 | 0.2875068 | -201.4897 | -0.2939066 | 0.5814134 | PPP1R7   |
| cg12351042 | 0.3540932 | -206.9507 | -0.293949  | 0.6480422 | OR2B2    |
| cg15542496 | 0.433926  | -229.1028 | -0.2943294 | 0.7282554 | PIP      |
| cg19876838 | 0.4309168 | -228.0695 | -0.2944055 | 0.7253224 | KCNJ14   |
| cg01515887 | 0.43412   | -229.7781 | -0.2946239 | 0.7287439 | SAA2     |
| cg25762706 | 0.2744652 | -202.9089 | -0.2947566 | 0.5692218 | STMN4    |
| cg25177139 | 0.4987257 | -265.106  | -0.2950055 | 0.7937313 | SLC10A6  |
| cg04953015 | 0.4183709 | -225.2698 | -0.2953083 | 0.7136792 | CHRNA2   |
| cg06270401 | 0.4692582 | -248.2442 | -0.2955773 | 0.7648356 | DYRK4    |



|                |           |           |            |           |          |
|----------------|-----------|-----------|------------|-----------|----------|
| cg1612259<br>2 | 0.3448111 | -208.5577 | -0.2957437 | 0.6405548 | MAGEB6   |
| cg1089451<br>2 | 0.3381223 | -207.8588 | -0.2958564 | 0.6339787 | ACTA2    |
| cg0872886<br>5 | 0.4955375 | -265.5357 | -0.2960736 | 0.7916111 | NALP7    |
| cg2630949<br>8 | 0.4998764 | -268.6193 | -0.296116  | 0.7959924 | EDAR     |
| cg2048516<br>5 | 0.351839  | -210.5687 | -0.2963197 | 0.6481587 | WFDC12   |
| cg1482668<br>3 | 0.2439201 | -207.6514 | -0.2967673 | 0.5406874 | SPRR2D   |
| cg1188424<br>3 | 0.4962993 | -267.8994 | -0.2968309 | 0.7931302 | FCN2     |
| cg0059495<br>2 | 0.2681084 | -206.3009 | -0.2968436 | 0.564952  | RIMS3    |
| cg1238564<br>3 | 0.5306451 | -296.6125 | -0.297254  | 0.8278991 | UGT1A6   |
| cg2380764<br>6 | 0.299449  | -207.4817 | -0.2975548 | 0.5970038 | SLC26A8  |
| cg0456700<br>9 | 0.2945365 | -207.3489 | -0.2975717 | 0.5921081 | FCGR3B   |
| cg2433116<br>2 | 0.4167991 | -229.3218 | -0.2976643 | 0.7144635 | SYT8     |
| cg2031173<br>0 | 0.3301173 | -210.391  | -0.297957  | 0.6280743 | NALP10   |
| cg2473548<br>9 | 0.3264592 | -210.1205 | -0.2980265 | 0.6244857 | CDSN     |
| cg1027577<br>0 | 0.1418907 | -231.9794 | -0.2981641 | 0.4400549 | ICAM2    |
| cg0759797<br>6 | 0.2868437 | -208.5621 | -0.2984506 | 0.5852943 | CD19     |
| cg0941453<br>5 | 0.3050535 | -209.453  | -0.2986448 | 0.6036983 | GRIP1    |
| cg1981411<br>6 | 0.3197477 | -210.6377 | -0.2987388 | 0.6184865 | KCNAB2   |
| cg2501305<br>3 | 0.3983355 | -225.6137 | -0.2988573 | 0.6971928 | UNC45B   |
| cg0748482<br>7 | 0.2010359 | -217.9637 | -0.2997178 | 0.5007538 | CHRNA10  |
| cg0068901<br>0 | 0.3544577 | -217.1094 | -0.299865  | 0.6543227 | NCSTN    |
| cg0156873<br>6 | 0.4397594 | -243.0704 | -0.2999135 | 0.7396729 | SERPINB7 |
| cg2485754<br>5 | 0.3778389 | -222.0903 | -0.2999452 | 0.6777841 | GDI1     |

|            |           |           |            |           |          |
|------------|-----------|-----------|------------|-----------|----------|
| cg19787037 | 0.2486239 | -212.3845 | -0.3001315 | 0.5487555 | SPAG11   |
| cg01837574 | 0.2350105 | -213.6321 | -0.3001465 | 0.535157  | TRAPPC1  |
| cg12951282 | 0.3102588 | -212.3048 | -0.300186  | 0.6104448 | ASGR2    |
| cg01657380 | 0.3695983 | -220.801  | -0.3002739 | 0.6698722 | NPFF     |
| cg02595219 | 0.1629007 | -228.2505 | -0.3003815 | 0.4632823 | KCNE3    |
| cg24516901 | 0.1643419 | -227.8892 | -0.300416  | 0.4647579 | FLJ22746 |
| cg23881725 | 0.1290403 | -240.6183 | -0.3006434 | 0.4296838 | DLEC1    |
| cg23412777 | 0.3415281 | -216.9855 | -0.3009939 | 0.6425221 | PYGO1    |
| cg03087937 | 0.385405  | -226.4005 | -0.3012088 | 0.6866138 | MUC15    |
| cg01423840 | 0.4147469 | -235.7854 | -0.3012819 | 0.7160288 | FATE1    |
| cg02192520 | 0.3836895 | -226.5977 | -0.3015588 | 0.6852483 | RDH5     |
| cg02910574 | 0.5941569 | -348.7749 | -0.3016344 | 0.8957913 | PCOLN3   |
| cg15485859 | 0.4319783 | -243.3994 | -0.3016829 | 0.7336613 | C1orf116 |
| cg03609102 | 0.2694587 | -213.8795 | -0.3017732 | 0.5712318 | MUC5B    |
| cg04323365 | 0.4421142 | -248.6726 | -0.3020498 | 0.744164  | GJB1     |
| cg07711097 | 0.3607093 | -222.5272 | -0.3022776 | 0.6629869 | GML      |
| cg14120879 | 0.4525312 | -254.4807 | -0.3023432 | 0.7548744 | DEFB105A |
| cg00367281 | 0.331255  | -218.5727 | -0.3027655 | 0.6340206 | CHRN3    |
| cg14662756 | 0.3419178 | -220.1774 | -0.3028201 | 0.6447378 | NPFF     |
| cg12334759 | 0.3951156 | -232.3406 | -0.3028546 | 0.6979702 | C19orf19 |
| cg15589427 | 0.4314269 | -246.165  | -0.3031134 | 0.7345403 | MUC4     |
| cg22190114 | 0.4119118 | -239.1468 | -0.3034697 | 0.7153814 | NALP8    |
| cg06832950 | 0.4723859 | -268.7228 | -0.3036266 | 0.7760125 | SPG3A    |

|                |           |           |            |           |          |
|----------------|-----------|-----------|------------|-----------|----------|
| cg1879728<br>2 | 0.5953857 | -348.7749 | -0.3036309 | 0.8990166 | CYB561D2 |
| cg0081936<br>2 | 0.466608  | -265.5596 | -0.3037535 | 0.7703615 | CLIPR-59 |
| cg0711582<br>0 | 0.2731039 | -217.1794 | -0.3039018 | 0.5770056 | EPX      |
| cg1698684<br>6 | 0.2885061 | -217.3856 | -0.3039656 | 0.5924717 | SCGB2A1  |
| cg0153010<br>1 | 0.3236629 | -220.347  | -0.3043205 | 0.6279835 | KCNQ1DN  |
| cg0591212<br>1 | 0.3555444 | -225.4672 | -0.3044579 | 0.6600023 | TH       |
| cg2202204<br>1 | 0.4443298 | -256.1099 | -0.3049418 | 0.7492716 | CCR9     |
| cg1012741<br>5 | 0.2211309 | -222.8673 | -0.3051186 | 0.5262495 | MAGEB6   |
| cg2377689<br>2 | 0.4715109 | -271.8214 | -0.3051617 | 0.7766726 | MAGEA1   |
| cg2175088<br>7 | 0.3538496 | -227.4035 | -0.3057028 | 0.6595525 | CPA6     |
| cg1428417<br>1 | 0.5185962 | -309.479  | -0.3057945 | 0.8243908 | SSX4     |
| cg1756899<br>6 | 0.1752705 | -233.1097 | -0.3058789 | 0.4811494 | NFAM1    |
| cg1574398<br>5 | 0.3984907 | -239.7922 | -0.3061033 | 0.704594  | CD22     |
| cg0741225<br>4 | 0.3247169 | -224.75   | -0.3067812 | 0.631498  | FLJ14816 |
| cg0698005<br>3 | 0.1829755 | -232.7939 | -0.3069162 | 0.4898917 | RASSF1   |
| cg1541724<br>4 | 0.4081542 | -245.0354 | -0.3070277 | 0.7151818 | PDZRN4   |
| cg1374534<br>6 | 0.3691884 | -233.7293 | -0.3072953 | 0.6764838 | CBFA2T3  |
| cg1484509<br>1 | 0.3173621 | -224.8275 | -0.3073019 | 0.624664  | ADPRHL1  |
| cg0448875<br>8 | 0.3539637 | -230.9232 | -0.307604  | 0.6615677 | USP44    |
| cg2482484<br>0 | 0.4822708 | -285.8018 | -0.3078383 | 0.790109  | SHANK1   |
| cg0172676<br>7 | 0.3104739 | -225.4662 | -0.3080482 | 0.6185221 | LALBA    |
| cg2658307<br>8 | 0.3529527 | -231.7403 | -0.3081514 | 0.6611041 | SORBS2   |
| cg1472216<br>2 | 0.3435368 | -230.1602 | -0.3082675 | 0.6518043 | C5orf20  |

|                |            |           |            |           |          |
|----------------|------------|-----------|------------|-----------|----------|
| cg0334394<br>2 | 0.2283098  | -227.3196 | -0.3084953 | 0.5368052 | SLC39A5  |
| cg0450502<br>3 | 0.391199   | -242.3107 | -0.3085439 | 0.6997429 | SPRR1A   |
| cg0177464<br>5 | 0.3735765  | -237.9543 | -0.3089375 | 0.682514  | ARHGAP30 |
| cg0930011<br>4 | 0.1577924  | -242.8071 | -0.3089397 | 0.466732  | SLC16A5  |
| cg0338772<br>3 | 0.4543735  | -271.0217 | -0.3090995 | 0.763473  | SCMH1    |
| cg0163773<br>4 | 0.3084218  | -227.1574 | -0.3091258 | 0.6175476 | CD5L     |
| cg2196176<br>6 | 0.3685766  | -237.6838 | -0.3094645 | 0.6780411 | PRRG2    |
| cg2485266<br>1 | 0.08128477 | -278.1111 | -0.3094985 | 0.3907833 | GOLPH2   |
| cg1206112<br>7 | 0.3592356  | -235.6332 | -0.3095291 | 0.6687647 | WFDC9    |
| cg2326002<br>6 | 0.1967403  | -233.9593 | -0.3095856 | 0.506326  | FSTL3    |
| cg0114425<br>1 | 0.4234826  | -257.085  | -0.309829  | 0.7333116 | KLK9     |
| cg0544028<br>9 | 0.4445443  | -268.1076 | -0.3101572 | 0.7547014 | IVL      |
| cg2018978<br>2 | 0.3994969  | -248.4702 | -0.3102429 | 0.7097399 | MGC27121 |
| cg1897922<br>3 | 0.3499402  | -235.7845 | -0.3106611 | 0.6606013 | CDKN2B   |
| cg1101524<br>1 | 0.5503455  | -348.7749 | -0.3106692 | 0.8610147 | ATP10A   |
| cg2371374<br>2 | 0.3318533  | -232.6584 | -0.3106843 | 0.6425375 | SPAG4    |
| cg1171928<br>3 | 0.3476937  | -235.7845 | -0.3109031 | 0.6585968 | ZNF574   |
| cg0623627<br>6 | 0.4471342  | -271.3352 | -0.3109686 | 0.7581028 | SLC22A2  |
| cg1584243<br>0 | 0.3167358  | -231.4837 | -0.3111222 | 0.627858  | FAM12B   |
| cg1813848<br>4 | 0.5136509  | -323.2769 | -0.3121738 | 0.8258247 | CABP2    |
| cg0107464<br>0 | 0.3346144  | -236.1454 | -0.3123727 | 0.6469871 | IFNA17   |
| cg0332957<br>2 | 0.3782331  | -246.0053 | -0.3123915 | 0.6906246 | FCRL5    |
| cg1739861<br>3 | 0.4418865  | -272.6744 | -0.3127682 | 0.7546546 | SLC37A1  |

|            |           |           |            |           |           |
|------------|-----------|-----------|------------|-----------|-----------|
| cg01718139 | 0.4526706 | -279.7219 | -0.3131233 | 0.7657939 | UNQ3033   |
| cg08093398 | 0.3388049 | -238.2931 | -0.3131634 | 0.6519684 | PSF1      |
| cg07792737 | 0.499006  | -313.3028 | -0.3133103 | 0.8123163 | NPIP      |
| cg00941549 | 0.3542565 | -242.6567 | -0.3138266 | 0.6680831 | AKAP4     |
| cg07441143 | 0.3756903 | -248.3413 | -0.3139452 | 0.6896355 | SLURP1    |
| cg21495715 | 0.4009342 | -257.1218 | -0.3141456 | 0.7150798 | SLC5A10   |
| cg19304352 | 0.4781792 | -299.7588 | -0.3143869 | 0.7925661 | DEFA4     |
| cg07339327 | 0.589286  | -348.7749 | -0.3146479 | 0.9039338 | CCND1     |
| cg24851490 | 0.1888121 | -244.8876 | -0.3154348 | 0.5042468 | RNASE2    |
| cg25778166 | 0.4093631 | -263.4814 | -0.3154951 | 0.7248582 | FMO3      |
| cg03752885 | 0.2096111 | -241.1967 | -0.315537  | 0.5251481 | DAPK3     |
| cg22549408 | 0.1818073 | -246.801  | -0.3156732 | 0.4974805 | PMAIP1    |
| cg02423618 | 0.2757107 | -237.0193 | -0.3158058 | 0.5915165 | SPATA8    |
| cg08970446 | 0.5067712 | -327.5336 | -0.3158175 | 0.8225887 | SLC1A7    |
| cg02324920 | 0.209111  | -242.125  | -0.3160629 | 0.5251739 | NEURL     |
| cg14256699 | 0.5442404 | -348.7749 | -0.3161483 | 0.8603887 | SOST      |
| cg10575735 | 0.284551  | -237.9914 | -0.3162329 | 0.6007839 | SSX4      |
| cg20416179 | 0.4743852 | -301.8759 | -0.3162399 | 0.7906252 | C6orf71   |
| cg18521925 | 0.5781611 | -348.7749 | -0.3162503 | 0.8944114 | SLC22A16  |
| cg22988566 | 0.4938543 | -317.5233 | -0.3163781 | 0.8102324 | WFDC10B   |
| cg01982597 | 0.3661152 | -250.7563 | -0.3164918 | 0.682607  | PGBD3     |
| cg08341924 | 0.4413522 | -282.5049 | -0.3169741 | 0.7583263 | TGM1      |
| cg18121684 | 0.3630699 | -251.0052 | -0.3170307 | 0.6801006 | SERPINB13 |

|            |           |           |            |           |          |
|------------|-----------|-----------|------------|-----------|----------|
| cg01309153 | 0.5313424 | -348.7749 | -0.3171424 | 0.8484849 | SURF1    |
| cg05822532 | 0.2233445 | -242.0048 | -0.3171787 | 0.5405232 | ELN      |
| cg12593411 | 0.3117052 | -241.9807 | -0.3172739 | 0.6289791 | ANGPTL6  |
| cg03602500 | 0.4131526 | -269.6009 | -0.3175448 | 0.7306974 | FLJ00060 |
| cg02812142 | 0.3308622 | -245.206  | -0.3175869 | 0.6484491 | ACMSD    |
| cg19042947 | 0.3210836 | -243.7479 | -0.3176198 | 0.6387034 | SERPINA4 |
| cg12067287 | 0.4388438 | -282.8668 | -0.31771   | 0.7565538 | MYOM1    |
| cg25168545 | 0.1682519 | -253.7777 | -0.3178436 | 0.4860955 | GIMAP1   |
| cg05922591 | 0.4898552 | -319.3784 | -0.318222  | 0.8080772 | LILRB4   |
| cg21003606 | 0.5716891 | -348.7749 | -0.3183283 | 0.8900174 | CALN1    |
| cg20095587 | 0.3961494 | -264.8537 | -0.3185588 | 0.7147083 | TREM2    |
| cg25372195 | 0.3394875 | -248.6429 | -0.3185948 | 0.6580823 | DCD      |
| cg09701102 | 0.4342366 | -283.1285 | -0.3188852 | 0.7531219 | NDUFV1   |
| cg21450627 | 0.4967114 | -327.4556 | -0.3189473 | 0.8156587 | PSD4     |
| cg17264470 | 0.5351574 | -348.7749 | -0.3191949 | 0.8543522 | FGF21    |
| cg19233472 | 0.4023962 | -270.363  | -0.3199585 | 0.7223547 | FOXI1    |
| cg04816348 | 0.5461007 | -348.7749 | -0.3201669 | 0.8662676 | CLEC4G   |
| cg16772207 | 0.300029  | -246.0688 | -0.320203  | 0.620232  | MYT1     |
| cg25101056 | 0.3682984 | -259.6443 | -0.3205852 | 0.6888835 | KCNG4    |
| cg12582965 | 0.538265  | -348.7749 | -0.3206046 | 0.8588696 | ATP10A   |
| cg08244028 | 0.3322591 | -251.5128 | -0.3207971 | 0.6530562 | MSH3     |
| cg19954000 | 0.1807596 | -256.083  | -0.3212267 | 0.5019863 | FGF1     |
| cg13271951 | 0.2038947 | -251.6207 | -0.3213497 | 0.5252445 | FAM57B   |

|            |           |           |            |           |          |
|------------|-----------|-----------|------------|-----------|----------|
| cg15780361 | 0.2299047 | -248.4702 | -0.321486  | 0.5513908 | ALS2CR11 |
| cg25400358 | 0.2410407 | -248.0784 | -0.3217643 | 0.5628049 | GPR137   |
| cg20932053 | 0.3926281 | -270.7892 | -0.3219326 | 0.7145607 | CPM      |
| cg04254916 | 0.539686  | -348.7749 | -0.3223692 | 0.8620552 | KRT5     |
| cg01883966 | 0.4561415 | -305.0645 | -0.3223773 | 0.7785187 | STK19    |
| cg08972170 | 0.2339301 | -250.3322 | -0.3227753 | 0.5567054 | Ells1    |
| cg11554507 | 0.3991411 | -276.0389 | -0.3231147 | 0.7222558 | NEUROD6  |
| cg02028524 | 0.5449733 | -348.7749 | -0.3231244 | 0.8680977 | ATXN3    |
| cg01182697 | 0.3052483 | -252.9377 | -0.3236393 | 0.6288877 | TMEM59   |
| cg13397379 | 0.3157371 | -257.1284 | -0.3251512 | 0.6408883 | OR2C3    |
| cg19982860 | 0.3042715 | -255.7838 | -0.3252042 | 0.6294757 | IFNA21   |
| cg19949550 | 0.4134928 | -287.7309 | -0.3253303 | 0.7388231 | ASB2     |
| cg13204181 | 0.3053282 | -257.085  | -0.3258382 | 0.6311664 | GH1      |
| cg11113534 | 0.5300537 | -348.7749 | -0.3259196 | 0.8559733 | C20orf70 |
| cg01894895 | 0.4521631 | -312.1754 | -0.3261403 | 0.7783033 | ANXA1    |
| cg16990174 | 0.2211758 | -257.6286 | -0.3263122 | 0.547488  | RYBP     |
| cg13656062 | 0.425539  | -296.9852 | -0.3265587 | 0.7520977 | CYP4F2   |
| cg07408456 | 0.2800498 | -256.3827 | -0.3266129 | 0.6066627 | PGLYRP2  |
| cg25033144 | 0.4058695 | -287.4645 | -0.3267667 | 0.7326362 | FLJ00060 |
| cg20543571 | 0.5135859 | -348.7749 | -0.3273217 | 0.8409076 | C15orf43 |
| cg17788013 | 0.3699794 | -274.8345 | -0.3275354 | 0.6975147 | SPINK5   |
| cg15905124 | 0.4435846 | -310.2589 | -0.3276067 | 0.7711913 | MGC13034 |
| cg20576002 | 0.2806484 | -259.0337 | -0.3280269 | 0.6086753 | FAM112B  |

|            |           |           |            |           |           |
|------------|-----------|-----------|------------|-----------|-----------|
| cg24670715 | 0.1713827 | -270.2169 | -0.3282604 | 0.4996431 | ANGPT2    |
| cg04574507 | 0.320428  | -264.5321 | -0.3284984 | 0.6489264 | CD1B      |
| cg02854090 | 0.4854319 | -345.7707 | -0.3285809 | 0.8140128 | HIST1H2AA |
| cg18241647 | 0.4670315 | -329.9    | -0.3285989 | 0.7956304 | WFDC12    |
| cg02351381 | 0.1352054 | -283.05   | -0.3289891 | 0.4641945 | C12orf34  |
| cg19807685 | 0.3460565 | -272.0647 | -0.3295546 | 0.6756111 | HSD17B2   |
| cg12069042 | 0.3494155 | -272.9709 | -0.3295701 | 0.6789856 | PLXNB1    |
| cg03309967 | 0.2867194 | -262.5089 | -0.3296222 | 0.6163416 | PSENN     |
| cg19368582 | 0.3172802 | -266.4619 | -0.3297521 | 0.6470323 | MMRN2     |
| cg25781162 | 0.4241525 | -304.3334 | -0.3298658 | 0.7540183 | ABCG5     |
| cg23514672 | 0.5426379 | -348.7749 | -0.3300395 | 0.8726774 | FLJ32871  |
| cg24949488 | 0.3425885 | -273.2851 | -0.3305674 | 0.6731559 | DNTT      |
| cg14696820 | 0.2702724 | -263.5793 | -0.3306769 | 0.6009493 | LCE1A     |
| cg22013966 | 0.5103047 | -348.7749 | -0.3306804 | 0.8409851 | SERPINA13 |
| cg16504670 | 0.3743675 | -284.0467 | -0.3309907 | 0.7053581 | FLJ20186  |
| cg27157038 | 0.4188251 | -304.5585 | -0.3311552 | 0.7499803 | DNTT      |
| cg19859270 | 0.3516883 | -277.267  | -0.3312573 | 0.6829456 | GPR15     |
| cg02187357 | 0.3034384 | -267.8733 | -0.331506  | 0.6349444 | TBC1D22B  |
| cg02442161 | 0.4215718 | -307.0399 | -0.3315553 | 0.7531271 | PI3       |
| cg07643942 | 0.2304846 | -266.2505 | -0.3316405 | 0.5621251 | LACRT     |
| cg18534730 | 0.3089684 | -268.873  | -0.3316447 | 0.6406131 | CABP5     |
| cg21065959 | 0.3270609 | -272.1416 | -0.3317196 | 0.6587805 | LCE1E     |
| cg13760253 | 0.3162237 | -270.5275 | -0.3318921 | 0.6481158 | DNAJC5B   |



|                |           |           |            |           |          |
|----------------|-----------|-----------|------------|-----------|----------|
| cg1592813<br>2 | 0.2756708 | -266.1103 | -0.3318962 | 0.607567  | CCKAR    |
| cg2089191<br>7 | 0.3902772 | -293.15   | -0.3322009 | 0.7224781 | IFRD1    |
| cg1956177<br>4 | 0.5268241 | -348.7749 | -0.3324218 | 0.8592458 | SLC22A2  |
| cg0007596<br>7 | 0.3824354 | -291.3182 | -0.3328268 | 0.7152622 | STRA6    |
| cg2361776<br>0 | 0.3733044 | -288.7275 | -0.3332415 | 0.7065459 | C16orf44 |
| cg1075829<br>2 | 0.4364644 | -320.8498 | -0.3333943 | 0.7698587 | DEFA1    |
| cg1971715<br>0 | 0.3335588 | -277.8349 | -0.3337365 | 0.6672953 | HNF4A    |
| cg1032287<br>6 | 0.2894093 | -271.2307 | -0.3340718 | 0.6234811 | CYP2B6   |
| cg1646207<br>5 | 0.3905206 | -298.1159 | -0.3343013 | 0.7248219 | MUC3B    |
| cg1392896<br>1 | 0.3672721 | -289.3833 | -0.3345127 | 0.7017848 | K6IRS3   |
| cg2694676<br>9 | 0.4461865 | -331.5528 | -0.3348459 | 0.7810324 | MAPK4    |
| cg0782474<br>2 | 0.4240645 | -317.2795 | -0.3350067 | 0.7590712 | DBH      |
| cg1489414<br>4 | 0.1440335 | -290.8352 | -0.3354205 | 0.479454  | LAMA3    |
| cg1958788<br>7 | 0.3591017 | -289.2095 | -0.3356785 | 0.6947802 | PSKH2    |
| cg0729717<br>8 | 0.4227123 | -320.8498 | -0.3367051 | 0.7594174 | CEACAM7  |
| cg1080567<br>6 | 0.3764992 | -298.1159 | -0.3368258 | 0.7133251 | MRPL28   |
| cg0847508<br>8 | 0.5112026 | -348.7749 | -0.3372961 | 0.8484987 | NALP9    |
| cg2737745<br>0 | 0.4690699 | -348.7749 | -0.337738  | 0.8068079 | ARHGEF18 |
| cg0068934<br>0 | 0.2298347 | -278.4274 | -0.3382654 | 0.5681001 | RTKN     |
| cg1331144<br>0 | 0.1763167 | -286.8754 | -0.3384621 | 0.5147789 | CD48     |
| cg1650752<br>2 | 0.4233927 | -326.4729 | -0.3386524 | 0.7620451 | SERPINA3 |
| cg1474025<br>1 | 0.3529815 | -294.6292 | -0.3389704 | 0.6919519 | SIGLEC5  |
| cg1904767<br>0 | 0.3294801 | -288.479  | -0.3391854 | 0.6686655 | CCND1    |

|                |           |           |            |           |           |
|----------------|-----------|-----------|------------|-----------|-----------|
| cg2647327<br>2 | 0.5279998 | -348.7749 | -0.3393892 | 0.867389  | SYT8      |
| cg2054460<br>5 | 0.3180154 | -286.9964 | -0.3396858 | 0.6577012 | SORBS2    |
| cg1183006<br>1 | 0.5756878 | -348.7749 | -0.3400308 | 0.9157187 | INSL6     |
| cg0610132<br>4 | 0.1550567 | -296.0378 | -0.3403668 | 0.4954236 | SPRR1A    |
| cg1159950<br>5 | 0.4242913 | -332.6265 | -0.340737  | 0.7650282 | C20orf102 |
| cg1622256<br>8 | 0.3685597 | -305.0645 | -0.3411613 | 0.709721  | APEG1     |
| cg0322161<br>9 | 0.2118894 | -286.0238 | -0.3414024 | 0.5532917 | FCER2     |
| cg0020906<br>6 | 0.4603572 | -348.7749 | -0.3423614 | 0.8027186 | BRD1      |
| cg1099099<br>3 | 0.2558253 | -286.3273 | -0.3427078 | 0.5985331 | MLH1      |
| cg1305360<br>8 | 0.1682345 | -296.6315 | -0.3427556 | 0.5109901 | LGP1      |
| cg1281514<br>2 | 0.3333382 | -297.2897 | -0.3427876 | 0.6761258 | SPAG7     |
| cg0845098<br>2 | 0.2457947 | -286.7545 | -0.3429427 | 0.5887374 | NUMBL     |
| cg1888126<br>9 | 0.3009802 | -291.7268 | -0.3434087 | 0.6443889 | LEPREL2   |
| cg1972857<br>7 | 0.4293316 | -344.0611 | -0.3436246 | 0.7729563 | GUCA2B    |
| cg0765191<br>4 | 0.2293739 | -289.0584 | -0.343845  | 0.5732188 | CLDN15    |
| cg0472752<br>2 | 0.3212467 | -297.3263 | -0.3441927 | 0.6654394 | C18orf22  |
| cg1173962<br>6 | 0.3560668 | -307.6586 | -0.3442936 | 0.7003604 | AKT1S1    |
| cg1418269<br>0 | 0.4464585 | -348.7749 | -0.344438  | 0.7908964 | RUNX3     |
| cg0863402<br>4 | 0.47401   | -348.7749 | -0.3444574 | 0.8184674 | OR2F1     |
| cg0622075<br>5 | 0.2735677 | -290.8352 | -0.3445483 | 0.618116  | RAI2      |
| cg0844875<br>1 | 0.3164496 | -297.9808 | -0.3449927 | 0.6614423 | SEMA3G    |
| cg0471132<br>4 | 0.2199168 | -292.3047 | -0.3451746 | 0.5650914 | RIT2      |
| cg0481099<br>7 | 0.3262171 | -300.7907 | -0.3452186 | 0.6714357 | TAS2R60   |

|            |           |           |            |           |           |
|------------|-----------|-----------|------------|-----------|-----------|
| cg13320683 | 0.3166404 | -299.2458 | -0.3455568 | 0.6621972 | RHOBTB1   |
| cg25203980 | 0.4641289 | -348.7749 | -0.3457506 | 0.8098795 | CENTB5    |
| cg24750391 | 0.1432015 | -309.479  | -0.3458347 | 0.4890362 | PON3      |
| cg10853416 | 0.3606207 | -313.3767 | -0.3460103 | 0.7066309 | MS4A7     |
| cg19845843 | 0.3639342 | -314.9962 | -0.3461321 | 0.7100663 | CXorf20   |
| cg00463202 | 0.4237967 | -347.2758 | -0.3461489 | 0.7699456 | ADPRHL1   |
| cg17829936 | 0.3391233 | -306.7665 | -0.3463186 | 0.6854419 | TAAR5     |
| cg03468463 | 0.2994345 | -297.6812 | -0.3463667 | 0.6458012 | SERPINB12 |
| cg10569414 | 0.3428325 | -308.6522 | -0.3466473 | 0.6894798 | C21orf121 |
| cg15538820 | 0.5697677 | -348.7749 | -0.3467164 | 0.9164841 | OBP2B     |
| cg25072962 | 0.2782285 | -296.554  | -0.3471057 | 0.6253342 | MGC35295  |
| cg27418851 | 0.311491  | -302.8915 | -0.3477194 | 0.6592104 | MBL2      |
| cg01015871 | 0.2688373 | -297.2913 | -0.3479045 | 0.6167418 | MT4       |
| cg26701826 | 0.3084849 | -302.9755 | -0.3480487 | 0.6565337 | MGC26963  |
| cg00042156 | 0.2471239 | -297.0272 | -0.348168  | 0.5952918 | MGC16291  |
| cg23571857 | 0.198064  | -301.507  | -0.3486586 | 0.5467227 | BIRC4BP   |
| cg05547500 | 0.4804525 | -348.7749 | -0.3486833 | 0.8291358 | TXNDC2    |
| cg19728223 | 0.1896538 | -302.9755 | -0.3487248 | 0.5383787 | KCNQ1     |
| cg17778867 | 0.3272455 | -309.6911 | -0.3491242 | 0.6763697 | KRTAP10-8 |
| cg23815000 | 0.3778041 | -329.1322 | -0.3493912 | 0.7271953 | LCN1      |
| cg25004981 | 0.5378709 | -348.7749 | -0.3509209 | 0.8887918 | LASS3     |
| cg24901474 | 0.2006142 | -305.5334 | -0.3510062 | 0.5516204 | RGS5      |
| cg07997737 | 0.2210947 | -303.8585 | -0.3511978 | 0.5722926 | NRTN      |

|            |           |           |            |           |            |
|------------|-----------|-----------|------------|-----------|------------|
| cg04891836 | 0.2934032 | -307.0812 | -0.3512458 | 0.644649  | TNFSF14    |
| cg14150666 | 0.4839177 | -348.7749 | -0.3515122 | 0.8354299 | IL8RB      |
| cg26292028 | 0.338005  | -319.5547 | -0.3519822 | 0.6899872 | FLJ37587   |
| cg00727947 | 0.5193245 | -348.7749 | -0.3537263 | 0.8730508 | LILRA5     |
| cg05215575 | 0.2110835 | -310.0504 | -0.3539603 | 0.5650438 | FLJ25410   |
| cg16545105 | 0.3026612 | -315.692  | -0.3544002 | 0.6570615 | CRHBP      |
| cg10370591 | 0.2640827 | -312.5139 | -0.355426  | 0.6195087 | TPO        |
| cg12022621 | 0.1952462 | -315.0337 | -0.355493  | 0.5507392 | LAX1       |
| cg26422060 | 0.4297962 | -348.7749 | -0.3562454 | 0.7860416 | TBX10      |
| cg14238120 | 0.3563842 | -337.0802 | -0.3563156 | 0.7126997 | ELA3A      |
| cg16794682 | 0.3965029 | -348.7749 | -0.3569428 | 0.7534457 | CCND1      |
| cg27341860 | 0.5343295 | -348.7749 | -0.3570616 | 0.891391  | OR2L13     |
| cg21686987 | 0.4186376 | -348.7749 | -0.3578405 | 0.7764781 | CTRB1      |
| cg03160508 | 0.1568123 | -327.9585 | -0.3579195 | 0.5147318 | RHOD       |
| cg15503752 | 0.3715441 | -348.7749 | -0.3581851 | 0.7297292 | ST6GALNAC1 |
| cg19292712 | 0.3712697 | -348.7749 | -0.3589695 | 0.7302393 | SPAM1      |
| cg04719766 | 0.4248973 | -348.7749 | -0.3590316 | 0.7839289 | KCNQ1      |
| cg20373326 | 0.3214322 | -332.4868 | -0.3595674 | 0.6809996 | HSD17B2    |
| cg21640749 | 0.2827542 | -323.7346 | -0.3595734 | 0.6423277 | CD300LF    |
| cg01103730 | 0.3375708 | -338.4027 | -0.3597994 | 0.6973703 | IL20       |
| cg12339029 | 0.3652011 | -348.7749 | -0.3612871 | 0.7264883 | MYL1       |
| cg15652212 | 0.3316394 | -341.1264 | -0.361736  | 0.6933754 | FLJ90586   |
| cg16175263 | 0.2003271 | -328.7425 | -0.3626026 | 0.5629296 | TNFRSF10C  |

|                |           |           |            |           |          |
|----------------|-----------|-----------|------------|-----------|----------|
| cg1060464<br>6 | 0.1745284 | -332.9479 | -0.3626198 | 0.5371482 | RGS5     |
| cg0624441<br>7 | 0.4120114 | -348.7749 | -0.3627746 | 0.774786  | FCN1     |
| cg2695653<br>5 | 0.3958749 | -348.7749 | -0.3627959 | 0.7586708 | LAG3     |
| cg1058675<br>6 | 0.3181477 | -339.503  | -0.3628575 | 0.6810052 | NUP93    |
| cg0903781<br>3 | 0.2953879 | -335.3931 | -0.3635995 | 0.6589874 | LRRFIP1  |
| cg1193949<br>6 | 0.2945712 | -335.3694 | -0.3636539 | 0.6582251 | CD244    |
| cg0445087<br>6 | 0.4208348 | -348.7749 | -0.3637578 | 0.7845926 | FAM112B  |
| cg1115837<br>4 | 0.3409301 | -348.7749 | -0.3641396 | 0.7050698 | TFF2     |
| cg2728559<br>9 | 0.3972953 | -348.7749 | -0.3642851 | 0.7615805 | FLJ13841 |
| cg0653657<br>8 | 0.2856412 | -335.5433 | -0.3645044 | 0.6501456 | JPH4     |
| cg2642019<br>6 | 0.107358  | -348.7749 | -0.3647684 | 0.4721264 | GAS6     |
| cg0635150<br>3 | 0.3214939 | -346.1646 | -0.3651345 | 0.6866283 | RDBP     |
| cg0206702<br>1 | 0.3214141 | -348.7749 | -0.3671657 | 0.6885798 | DNAJC5B  |
| cg2374904<br>6 | 0.4210391 | -348.7749 | -0.3672394 | 0.7882785 | GPR61    |
| cg2469454<br>9 | 0.2729596 | -340.0665 | -0.3673411 | 0.6403007 | GRIP1    |
| cg2593419<br>8 | 0.4200501 | -348.7749 | -0.3677717 | 0.7878218 | FLJ36268 |
| cg0033450<br>7 | 0.2554906 | -341.3702 | -0.3688123 | 0.6243029 | MVP      |
| cg0182709<br>8 | 0.4260628 | -348.7749 | -0.3690447 | 0.7951075 | GIMAP7   |
| cg0944888<br>0 | 0.2688533 | -345.975  | -0.3701201 | 0.6389734 | PGLYRP3  |
| cg0576647<br>4 | 0.4462655 | -348.7749 | -0.3722165 | 0.818482  | CCL16    |
| cg1790756<br>7 | 0.2495751 | -348.7267 | -0.3722184 | 0.6217936 | HAMP     |
| cg2744234<br>9 | 0.2608824 | -348.7749 | -0.3723222 | 0.6332046 | NFKBIB   |
| cg1245651<br>0 | 0.306675  | -348.7749 | -0.3728879 | 0.6795629 | TFF2     |

|            |           |           |            |           |           |
|------------|-----------|-----------|------------|-----------|-----------|
| cg20551517 | 0.3850877 | -348.7749 | -0.374342  | 0.7594296 | GIP       |
| cg26927807 | 0.3188835 | -348.7749 | -0.3747691 | 0.6936526 | BTBD2     |
| cg19917856 | 0.1371489 | -348.7749 | -0.3757069 | 0.5128558 | LOC342897 |
| cg00392257 | 0.225586  | -348.7749 | -0.3773492 | 0.6029352 | ISG20L2   |
| cg24407065 | 0.4256686 | -348.7749 | -0.3775972 | 0.8032658 | BLZF1     |
| cg09837648 | 0.4888737 | -348.7749 | -0.3777339 | 0.8666076 | PLXNB1    |
| cg22021786 | 0.3327555 | -348.7749 | -0.378675  | 0.7114305 | WFDC8     |
| cg22784047 | 0.3078903 | -348.7749 | -0.3787077 | 0.6865979 | MVP       |
| cg26149550 | 0.4098181 | -348.7749 | -0.3787282 | 0.7885463 | KLK15     |
| cg18920397 | 0.3233509 | -348.7749 | -0.3793584 | 0.7027093 | LY9       |
| cg12266049 | 0.4434841 | -348.7749 | -0.3803962 | 0.8238803 | CCND1     |
| cg08573687 | 0.2995992 | -348.7749 | -0.381118  | 0.6807172 | TH        |
| cg12513481 | 0.1789031 | -348.7749 | -0.3813594 | 0.5602626 | SCAP1     |
| cg05348870 | 0.3878016 | -348.7749 | -0.3815948 | 0.7693964 | TNFSF14   |
| cg06123346 | 0.2381001 | -348.7749 | -0.3818949 | 0.6199951 | ATP4A     |
| cg24024214 | 0.4389569 | -348.7749 | -0.3825926 | 0.8215494 | BTNL8     |
| cg13578652 | 0.2515547 | -348.7749 | -0.3835748 | 0.6351296 | UBASH3A   |
| cg21948655 | 0.4149814 | -348.7749 | -0.3838922 | 0.7988736 | SMCP      |
| cg20334738 | 0.2641549 | -348.7749 | -0.3847269 | 0.6488818 | MAB21L2   |
| cg14706739 | 0.3043368 | -348.7749 | -0.3882393 | 0.6925761 | EPB49     |
| cg14287742 | 0.3607836 | -348.7749 | -0.3890128 | 0.7497964 | BLZF1     |
| cg27619475 | 0.1665866 | -348.7749 | -0.3898995 | 0.5564861 | SLC16A5   |
| cg24363955 | 0.3955405 | -348.7749 | -0.3900249 | 0.7855654 | FLJ14054  |

|            |            |           |            |           |          |
|------------|------------|-----------|------------|-----------|----------|
| cg10062065 | 0.2680338  | -348.7749 | -0.3903173 | 0.6583511 | APEG1    |
| cg19712821 | 0.1760713  | -348.7749 | -0.3907272 | 0.5667985 | KSP37    |
| cg12489960 | 0.2773709  | -348.7749 | -0.3914766 | 0.6688474 | SGCB     |
| cg05444024 | 0.4591744  | -348.7749 | -0.3926745 | 0.8518489 | FUT6     |
| cg06539449 | 0.3446391  | -348.7749 | -0.3946602 | 0.7392992 | CCND1    |
| cg14333565 | 0.396083   | -348.7749 | -0.3953836 | 0.7914666 | NRTN     |
| cg02833725 | 0.2565947  | -348.7749 | -0.395802  | 0.6523967 | ISG20L2  |
| cg18508525 | 0.4157193  | -348.7749 | -0.3960332 | 0.8117525 | CD36     |
| cg01335367 | 0.1252518  | -348.7749 | -0.3980991 | 0.5233509 | C12orf34 |
| cg25221254 | 0.3252484  | -348.7749 | -0.4011958 | 0.7264441 | ASAH3    |
| cg09542291 | 0.3679734  | -348.7749 | -0.4014573 | 0.7694307 | SMCP     |
| cg14204735 | 0.06346902 | -348.7749 | -0.4026766 | 0.4661456 | CYB561   |
| cg26672426 | 0.2225113  | -348.7749 | -0.4037136 | 0.626225  | PTGES    |
| cg18149207 | 0.3283783  | -348.7749 | -0.4049728 | 0.7333511 | RORC     |
| cg22374142 | 0.09221421 | -348.7749 | -0.4054623 | 0.4976765 | HSF4     |
| cg08626653 | 0.3053736  | -348.7749 | -0.405626  | 0.7109996 | FLJ37538 |
| cg05671018 | 0.2701975  | -348.7749 | -0.4091846 | 0.679382  | LYSMD2   |
| cg21457804 | 0.3395817  | -348.7749 | -0.4109329 | 0.7505146 | CT45-2   |
| cg25813714 | 0.4318691  | -348.7749 | -0.4117246 | 0.8435937 | CYP4F12  |
| cg04144768 | 0.2673632  | -348.7749 | -0.4117397 | 0.6791029 | DDC      |
| cg25119415 | 0.2724371  | -348.7749 | -0.4155039 | 0.687941  | MNDA     |
| cg24992780 | 0.3828233  | -348.7749 | -0.415848  | 0.7986712 | OR7C1    |
| cg27235662 | 0.3405131  | -348.7749 | -0.4166173 | 0.7571304 | CLDN16   |

|                |           |           |            |           |         |
|----------------|-----------|-----------|------------|-----------|---------|
| cg2015434<br>6 | 0.2175191 | -348.7749 | -0.4204669 | 0.6379861 | RAI2    |
| cg1499210<br>8 | 0.2941869 | -348.7749 | -0.4260712 | 0.7202581 | SNTB1   |
| cg2616418<br>4 | 0.3855456 | -348.7749 | -0.4293696 | 0.8149152 | FCN2    |
| cg1735706<br>2 | 0.3870036 | -348.7749 | -0.4387513 | 0.8257549 | FCN1    |
| cg0663954<br>4 | 0.2950993 | -348.7749 | -0.4434159 | 0.7385153 | OR7A5   |
| cg1571174<br>4 | 0.3159782 | -348.7749 | -0.4465452 | 0.7625234 | ANP32D  |
| cg0069868<br>8 | 0.3535878 | -348.7749 | -0.4504796 | 0.8040674 | SULT2B1 |
| cg0413875<br>6 | 0.3275818 | -348.7749 | -0.4530488 | 0.7806306 | SPRR3   |
| cg1617912<br>5 | 0.1886545 | -348.7749 | -0.4545456 | 0.6432001 | CTSZ    |
| cg2257554<br>0 | 0.2930815 | -348.7749 | -0.4627779 | 0.7558594 | TRIM54  |
| cg2585681<br>1 | 0.250794  | -348.7749 | -0.4671628 | 0.7179568 | SPRR3   |
| cg1302119<br>2 | 0.1280138 | -348.7749 | -0.4725023 | 0.6005161 | CTSZ    |
| cg1372650<br>7 | 0.3544714 | -348.7749 | -0.4739468 | 0.8284182 | CTAG2   |

**Supplementary table 12. Probes differentially methylated between tumours without known mutations and normal tissue.**

| TargetID   | unknown.AVG_Beta | unknown.DiffScore | unknown.DeltaBeta | normal.AVG_Beta | SYMBOL  |
|------------|------------------|-------------------|-------------------|-----------------|---------|
| cg01346152 | 0.6814715        | 350.469           | 0.4304945         | 0.2509769       | DHRS3   |
| cg13547644 | 0.5873128        | 350.469           | 0.4125772         | 0.1747356       | ACTA1   |
| cg16363586 | 0.7098469        | 350.469           | 0.3982374         | 0.3116095       | BST2    |
| cg24101578 | 0.7102449        | 350.469           | 0.3705311         | 0.3397138       | CDH22   |
| cg03852144 | 0.6351823        | 350.469           | 0.3689304         | 0.2662518       | GLRX    |
| cg03096975 | 0.5258527        | 350.469           | 0.3523498         | 0.1735029       | EML2    |
| cg17105014 | 0.5261912        | 350.469           | 0.3479071         | 0.1782841       | GYPC    |
| cg26509022 | 0.5475106        | 350.469           | 0.3441353         | 0.2033753       | ALDH1A3 |
| cg14409083 | 0.5781931        | 350.469           | 0.3396169         | 0.2385762       | EMP1    |
| cg15958424 | 0.6006592        | 350.469           | 0.3321485         | 0.2685107       | ACPP    |



|                |           |         |           |           |          |
|----------------|-----------|---------|-----------|-----------|----------|
| cg241229<br>22 | 0.7519797 | 350.469 | 0.3292961 | 0.4226836 | C20orf39 |
| cg175189<br>62 | 0.5537251 | 350.469 | 0.3288307 | 0.2248944 | GAL3ST4  |
| cg187021<br>97 | 0.6944927 | 350.469 | 0.328288  | 0.3662047 | HOXD3    |
| cg227408<br>35 | 0.6398525 | 350.469 | 0.325657  | 0.3141955 | DDR2     |
| cg133511<br>61 | 0.5640377 | 350.469 | 0.3244539 | 0.2395838 | SCARA3   |
| cg108615<br>99 | 0.600754  | 350.469 | 0.3187473 | 0.2820067 | TNFSF4   |
| cg041067<br>85 | 0.7986509 | 350.469 | 0.3125568 | 0.4860941 | CDK5R1   |
| cg192242<br>78 | 0.6235228 | 350.469 | 0.3086542 | 0.3148687 | ALDH1A3  |
| cg086242<br>49 | 0.7847296 | 350.469 | 0.3056994 | 0.4790302 | KIAA0889 |
| cg113978<br>54 | 0.4401974 | 350.469 | 0.3035792 | 0.1366182 | IQSEC1   |
| cg036425<br>18 | 0.6914626 | 350.469 | 0.3025503 | 0.3889123 | PNOC     |
| cg062049<br>48 | 0.5280117 | 350.469 | 0.3016967 | 0.226315  | MARK2    |
| cg178907<br>64 | 0.7068838 | 350.469 | 0.3010291 | 0.4058547 | ITIH4    |
| cg181721<br>86 | 0.8213209 | 350.469 | 0.3008283 | 0.5204926 | KIAA1913 |
| cg165173<br>94 | 0.5006071 | 350.469 | 0.2958764 | 0.2047307 | TNFSF4   |
| cg095954<br>79 | 0.4755045 | 350.469 | 0.2950402 | 0.1804643 | PRPH     |
| cg024900<br>34 | 0.6915616 | 350.469 | 0.2943864 | 0.3971752 | MEST     |
| cg088313<br>48 | 0.5661627 | 350.469 | 0.2891402 | 0.2770225 | EML2     |
| cg036057<br>61 | 0.643705  | 350.469 | 0.2866039 | 0.357101  | RNF126   |
| cg251019<br>36 | 0.7858939 | 350.469 | 0.2853156 | 0.5005782 | ZBTB16   |
| cg125644<br>53 | 0.8170016 | 350.469 | 0.2833523 | 0.5336493 | CETP     |
| cg139068<br>13 | 0.6822846 | 350.469 | 0.2830946 | 0.3991899 | HLA-DPA1 |
| cg011038<br>36 | 0.9576275 | 350.469 | 0.2826693 | 0.6749582 | MYO9B    |
| cg043763<br>12 | 0.5915592 | 350.469 | 0.2801917 | 0.3113675 | MYLK     |
| cg035621<br>20 | 0.6342204 | 350.469 | 0.2798998 | 0.3543206 | WISP2    |
| cg183924<br>82 | 0.8243915 | 350.469 | 0.2790235 | 0.545368  | AMDHD1   |
| cg025069<br>08 | 0.6998755 | 350.469 | 0.2773866 | 0.4224889 | HPD      |
| cg072852<br>76 | 0.7994277 | 350.469 | 0.2773489 | 0.5220789 | RAPGEF1  |
| cg011265<br>60 | 0.6687445 | 350.469 | 0.2709431 | 0.3978014 | C9orf142 |
| cg244276<br>60 | 0.7748529 | 350.469 | 0.2682846 | 0.5065683 | PNPLA2   |
| cg065072<br>44 | 0.712719  | 350.469 | 0.2662384 | 0.4464805 | DHX32    |

|            |           |         |           |           |           |
|------------|-----------|---------|-----------|-----------|-----------|
| cg22601917 | 0.5191174 | 350.469 | 0.2647981 | 0.2543193 | H6PD      |
| cg23855989 | 0.4838436 | 350.469 | 0.2643647 | 0.2194789 | AQP5      |
| cg15926585 | 0.7788066 | 350.469 | 0.2639491 | 0.5148575 | COMT      |
| cg23283495 | 0.3758452 | 350.469 | 0.2636493 | 0.1121959 | IRF6      |
| cg18342279 | 0.3697937 | 350.469 | 0.2633064 | 0.1064874 | ZAR1      |
| cg13763232 | 0.7459232 | 350.469 | 0.2629043 | 0.4830189 | SLC6A6    |
| cg11554605 | 0.7776657 | 350.469 | 0.2598264 | 0.5178393 | ASB4      |
| cg24012708 | 0.6787763 | 350.469 | 0.2565539 | 0.4222224 | HDHD3     |
| cg20427879 | 0.4578368 | 350.469 | 0.2564145 | 0.2014222 | EML2      |
| cg04369341 | 0.4384564 | 350.469 | 0.2560803 | 0.182376  | C20orf100 |
| cg05342835 | 0.6274884 | 350.469 | 0.2550435 | 0.3724449 | SYNC1     |
| cg24459563 | 0.739025  | 350.469 | 0.2549827 | 0.4840423 | CACNG1    |
| cg14371590 | 0.5649461 | 350.469 | 0.2531691 | 0.3117769 | SLC26A10  |
| cg17791651 | 0.549388  | 350.469 | 0.2515884 | 0.2977996 | POU3F1    |
| cg08858521 | 0.4704008 | 350.469 | 0.2512837 | 0.219117  | WFIKKN1   |
| cg24739326 | 0.4359259 | 350.469 | 0.2510368 | 0.1848891 | CHST8     |
| cg00240880 | 0.8355954 | 350.469 | 0.2493613 | 0.5862341 | WISP2     |
| cg07360692 | 0.4713236 | 350.469 | 0.2475134 | 0.2238103 | FLJ20032  |
| cg26668713 | 0.3950138 | 350.469 | 0.2474786 | 0.1475352 | SIPA1     |
| cg07236190 | 0.7302842 | 350.469 | 0.2446781 | 0.4856061 | AMDHD1    |
| cg10705800 | 0.610572  | 350.469 | 0.2433327 | 0.3672392 | CITED4    |
| cg17686260 | 0.7416171 | 350.469 | 0.2426279 | 0.4989893 | MGMT      |
| cg12232463 | 0.6724831 | 350.469 | 0.2419253 | 0.4305579 | LONRF2    |
| cg17998964 | 0.4034719 | 350.469 | 0.2396806 | 0.1637913 | MARK2     |
| cg25277950 | 0.3862685 | 350.469 | 0.2393395 | 0.146929  | EML2      |
| cg27301343 | 0.3826765 | 350.469 | 0.2374098 | 0.1452667 | EML2      |
| cg24315815 | 0.7594456 | 350.469 | 0.2352092 | 0.5242364 | PLSCR4    |
| cg16077929 | 0.7387622 | 350.469 | 0.2348567 | 0.5039055 | CDKL1     |
| cg12177001 | 0.7549378 | 350.469 | 0.2341995 | 0.5207384 | IFI27     |
| cg02674804 | 0.8607553 | 350.469 | 0.2312064 | 0.6295489 | REEP6     |
| cg27114026 | 0.7605855 | 350.469 | 0.2297867 | 0.5307989 | ELA1      |

|            |           |          |           |           |          |
|------------|-----------|----------|-----------|-----------|----------|
| cg05485060 | 0.6416215 | 142.6492 | 0.2297268 | 0.4118947 | CTNNAL1  |
| cg11318251 | 0.5723045 | 350.469  | 0.2287531 | 0.3435514 | BAALC    |
| cg02867079 | 0.4369153 | 350.469  | 0.2283422 | 0.2085731 | KIAA1822 |
| cg00431549 | 0.5604503 | 350.469  | 0.226958  | 0.3334922 | MGP      |
| cg02085507 | 0.4873027 | 350.469  | 0.2267435 | 0.2605592 | TRIP10   |
| cg27491887 | 0.4306612 | 350.469  | 0.2259769 | 0.2046843 | KCNQ1    |
| cg20748065 | 0.8443555 | 350.469  | 0.2254241 | 0.6189314 | POR      |
| cg22628873 | 0.6773793 | 136.8612 | 0.2245508 | 0.4528286 | GGT6     |
| cg16616769 | 0.7645056 | 142.6492 | 0.2245093 | 0.5399963 | MGC35048 |
| cg04640913 | 0.6180028 | 135.9285 | 0.2232044 | 0.3947985 | CDH22    |
| cg20777437 | 0.5372733 | 142.6492 | 0.2219902 | 0.3152832 | CDCP2    |
| cg01724150 | 0.5003433 | 350.469  | 0.2219546 | 0.2783887 | NMNAT3   |
| cg25683185 | 0.6858693 | 133.0886 | 0.2215774 | 0.4642918 | ACRBP    |
| cg04099420 | 0.5605203 | 135.9285 | 0.2186689 | 0.3418514 | RIPK1    |
| cg23418591 | 0.3284849 | 350.469  | 0.2153936 | 0.1130913 | FLJ90166 |
| cg05253327 | 0.7646453 | 132.6921 | 0.2136019 | 0.5510435 | B3GNT1   |
| cg22759185 | 0.7725071 | 133.5218 | 0.2132554 | 0.5592517 | REEP6    |
| cg01333011 | 0.5161049 | 135.1906 | 0.2128832 | 0.3032217 | PTHLH    |
| cg18109798 | 0.5877451 | 123.9389 | 0.2123849 | 0.3753601 | SLCO1C1  |
| cg17339202 | 0.490423  | 139.7417 | 0.2123547 | 0.2780684 | SYNC1    |
| cg17496788 | 0.5951198 | 122.5345 | 0.2117739 | 0.3833458 | DDR2     |
| cg03271907 | 0.7998694 | 138.0554 | 0.2112125 | 0.5886568 | MGMT     |
| cg04902405 | 0.6912694 | 119.1106 | 0.2093396 | 0.4819297 | ZC3H11A  |
| cg04498511 | 0.8106005 | 138.0554 | 0.209052  | 0.6015485 | ZC3H11A  |
| cg06834875 | 0.5246346 | 127.4415 | 0.2086236 | 0.316011  | KIAA1822 |
| cg16612562 | 0.6443003 | 116.7884 | 0.2085239 | 0.4357764 | RRP22    |
| cg13493001 | 0.7839817 | 127.7793 | 0.205815  | 0.5781667 | LCN12    |
| cg03630088 | 0.4568078 | 139.7417 | 0.2057614 | 0.2510464 | CPXM2    |
| cg02500392 | 0.8224658 | 136.8612 | 0.2048469 | 0.6176189 | PBOV1    |
| cg25936385 | 0.7644063 | 122.662  | 0.2046797 | 0.5597265 | FAIM2    |
| cg209598   | 0.3209203 | 350.469  | 0.2042592 | 0.1166611 | AJAP1    |

|            |            |           |            |           |          |
|------------|------------|-----------|------------|-----------|----------|
| 66         |            |           |            |           |          |
| cg09547190 | 0.5508294  | 117.2171  | 0.2041111  | 0.3467183 | C9orf89  |
| cg04700814 | 0.4973715  | 125.1854  | 0.2032702  | 0.2941013 | HEXIM1   |
| cg21685427 | 0.7495278  | 117.868   | 0.202522   | 0.5470058 | SGK2     |
| cg20833786 | 0.6462013  | 109.6015  | 0.2022284  | 0.4439728 | MRGPRX3  |
| cg02000005 | 0.3410668  | 350.469   | 0.202108   | 0.1389588 | CRIP1    |
| cg02806777 | 0.5145999  | 119.0985  | 0.2013923  | 0.3132075 | PGLYRP1  |
| cg14444710 | 0.7877882  | 122.6297  | 0.2002894  | 0.5874987 | PDPK1    |
| cg09931793 | 0.4911548  | -128.5634 | -0.2000441 | 0.6911989 | OR2K2    |
| cg25781162 | 0.5537649  | -152.4789 | -0.2002534 | 0.7540183 | ABCG5    |
| cg05248781 | 0.6409426  | -219.035  | -0.2003386 | 0.8412812 | LCE5A    |
| cg26511321 | 0.3597817  | -108.6272 | -0.2003743 | 0.560156  | HOXA7    |
| cg22960952 | 0.2887161  | -108.0575 | -0.2004288 | 0.4891449 | FLJ23657 |
| cg05301852 | 0.3942087  | -111.4083 | -0.2004712 | 0.59468   | FABP1    |
| cg10190509 | 0.5737554  | -163.862  | -0.2005683 | 0.7743237 | CCL16    |
| cg26143719 | 0.1893438  | -118.6379 | -0.2006184 | 0.3899621 | C1QTNF6  |
| cg23240895 | 0.5921366  | -175.9917 | -0.2006547 | 0.7927914 | PRR5     |
| cg19546781 | 0.6315832  | -209.94   | -0.2006587 | 0.8322418 | CCL17    |
| cg16155702 | 0.5687166  | -161.1652 | -0.2006587 | 0.7693753 | FGF21    |
| cg10848367 | 0.4534241  | -120.5707 | -0.200776  | 0.6542001 | SCGB1D2  |
| cg07979357 | 0.09189799 | -147.5306 | -0.2007895 | 0.2926875 | IL27RA   |
| cg14345281 | 0.1704164  | -122.6268 | -0.2008008 | 0.3712171 | NHS      |
| cg26246138 | 0.1424249  | -129.7667 | -0.2009023 | 0.3433271 | SCML2    |
| cg26628847 | 0.3036134  | -108.3471 | -0.2010518 | 0.5046653 | PIP      |
| cg19798224 | 0.5663769  | -160.8976 | -0.2011512 | 0.7675281 | C14orf68 |
| cg16998872 | 0.5543851  | -154.5475 | -0.2011616 | 0.7555467 | GYPE     |
| cg04655481 | 0.5008295  | -133.2088 | -0.2011638 | 0.7019932 | GPR21    |
| cg24352688 | 0.4165213  | -115.0526 | -0.2012428 | 0.6177641 | OFD1     |
| cg24698533 | 0.4817888  | -127.8783 | -0.2012511 | 0.6830398 | LYZL2    |
| cg10968815 | 0.5051225  | -134.879  | -0.2013581 | 0.7064807 | BPIL1    |
| cg23661676 | 0.3408925  | -109.0015 | -0.2013856 | 0.5422781 | GPR42    |

|            |           |           |            |           |          |
|------------|-----------|-----------|------------|-----------|----------|
| cg27291231 | 0.4933282 | -131.4405 | -0.2014705 | 0.6947987 | SSNA1    |
| cg12855851 | 0.606599  | -189.2622 | -0.2015212 | 0.8081203 | PGC      |
| cg15005385 | 0.3676634 | -110.5808 | -0.2016266 | 0.56929   | CCL3L1   |
| cg15096123 | 0.6527966 | -237.8688 | -0.2016768 | 0.8544734 | KLK4     |
| cg14287742 | 0.5481113 | -152.5283 | -0.2016851 | 0.7497964 | BLZF1    |
| cg03977657 | 0.5871169 | -174.9308 | -0.2016891 | 0.788806  | LAMB3    |
| cg26745032 | 0.252583  | -111.5679 | -0.2016976 | 0.4542806 | REPS2    |
| cg10878307 | 0.5519138 | -154.5287 | -0.2017702 | 0.753684  | ATAD4    |
| cg23812886 | 0.3305065 | -109.1984 | -0.201776  | 0.5322825 | SSX5     |
| cg07879977 | 0.3231188 | -109.2624 | -0.2019235 | 0.5250422 | OR1F1    |
| cg03264414 | 0.6387786 | -221.6779 | -0.2019572 | 0.8407358 | PAEP     |
| cg05446471 | 0.6374071 | -220.1971 | -0.201979  | 0.8393861 | HDAC11   |
| cg09033997 | 0.5264444 | -143.6712 | -0.202019  | 0.7284634 | CCR9     |
| cg03309967 | 0.4142775 | -115.8041 | -0.2020641 | 0.6163416 | PSENNEN  |
| cg14519000 | 0.674649  | -272.4478 | -0.2020976 | 0.8767466 | GATA5    |
| cg08886154 | 0.3435394 | -109.9685 | -0.2021428 | 0.5456822 | PAX4     |
| cg01375871 | 0.292162  | -109.9208 | -0.202222  | 0.4943841 | TPSD1    |
| cg26457013 | 0.4282984 | -118.0962 | -0.2022548 | 0.6305531 | TMEM86B  |
| cg24459209 | 0.4341656 | -119.0916 | -0.2022845 | 0.6364501 | PRG3     |
| cg09528351 | 0.4890288 | -131.7593 | -0.2024699 | 0.6914986 | PIK3R5   |
| cg05997860 | 0.4198144 | -117.1577 | -0.2025199 | 0.6223344 | ADAM21   |
| cg15585987 | 0.2586266 | -111.9817 | -0.2025244 | 0.461151  | SNTG1    |
| cg08579995 | 0.566052  | -163.5891 | -0.2025282 | 0.7685802 | FLJ46230 |
| cg14532417 | 0.5560964 | -158.2033 | -0.2025285 | 0.758625  | TBC1D3   |
| cg27235662 | 0.5545719 | -157.4603 | -0.2025585 | 0.7571304 | CLDN16   |
| cg21624359 | 0.2754244 | -111.0086 | -0.2025919 | 0.4780163 | FFAR3    |
| cg22879289 | 0.3321253 | -110.2431 | -0.2026705 | 0.5347958 | NID1     |
| cg08742106 | 0.6817402 | -287.805  | -0.2027206 | 0.8844607 | USP6     |
| cg14662756 | 0.4419882 | -121.1227 | -0.2027497 | 0.6447378 | NPFF     |
| cg07728874 | 0.6182184 | -203.3476 | -0.2029507 | 0.8211691 | CD3D     |
| cg19589427 | 0.4562003 | -124.3003 | -0.2029857 | 0.659186  | TNFSF18  |

|            |           |           |            |           |          |
|------------|-----------|-----------|------------|-----------|----------|
| cg05546044 | 0.3555813 | -111.7557 | -0.2032208 | 0.5588021 | MAPK1    |
| cg27562023 | 0.4343779 | -120.4867 | -0.2032826 | 0.6376605 | RPH3AL   |
| cg08130265 | 0.3575872 | -112.0204 | -0.2033535 | 0.5609407 | C15orf5  |
| cg19304352 | 0.5891515 | -180.5075 | -0.2034146 | 0.7925661 | DEFA4    |
| cg12351042 | 0.4446113 | -122.5696 | -0.2034309 | 0.6480422 | OR2B2    |
| cg16008138 | 0.2571468 | -113.1126 | -0.2034487 | 0.4605955 | RNF190   |
| cg23680518 | 0.6143672 | -201.2478 | -0.2034728 | 0.81784   | SBSN     |
| cg11825652 | 0.3779734 | -113.7295 | -0.2035752 | 0.5815486 | CAV2     |
| cg25545210 | 0.4834449 | -131.9233 | -0.2035863 | 0.6870312 | KRTHA4   |
| cg19206010 | 0.2167109 | -117.6592 | -0.2037381 | 0.420449  | UXT      |
| cg07974891 | 0.3247699 | -111.4157 | -0.2037973 | 0.5285671 | ITGB1BP1 |
| cg18374517 | 0.4943168 | -135.6153 | -0.2039071 | 0.6982238 | ALPPL2   |
| cg22377428 | 0.5773259 | -173.7116 | -0.203989  | 0.781315  | GPR142   |
| cg26331247 | 0.2360469 | -115.6356 | -0.2039969 | 0.4400437 | FLJ33706 |
| cg07026910 | 0.5204266 | -144.8506 | -0.2040021 | 0.7244287 | INPP5D   |
| cg26185508 | 0.4759432 | -130.7388 | -0.2041225 | 0.6800656 | CDCP2    |
| cg24613957 | 0.4229544 | -119.7586 | -0.2041295 | 0.6270838 | PLA2G2E  |
| cg21003606 | 0.6858142 | -302.5053 | -0.2042032 | 0.8900174 | CALN1    |
| cg05800321 | 0.6269315 | -215.6367 | -0.2042062 | 0.8311377 | LY6D     |
| cg04995095 | 0.3203951 | -111.8823 | -0.2042515 | 0.5246466 | CD300E   |
| cg20176989 | 0.3948682 | -116.2972 | -0.2043197 | 0.5991879 | KIR3DL2  |
| cg02124291 | 0.5049173 | -139.7856 | -0.2043475 | 0.7092648 | OR7A5    |
| cg06494770 | 0.3388134 | -112.3758 | -0.2043531 | 0.5431665 | KLHL13   |
| cg18466173 | 0.5667016 | -168.2278 | -0.2045015 | 0.771203  | C21orf93 |
| cg11113534 | 0.6514103 | -246.1186 | -0.204563  | 0.8559733 | C20orf70 |
| cg16381688 | 0.3445688 | -112.8477 | -0.2045686 | 0.5491374 | THEM2    |
| cg24309555 | 0.4217562 | -120.1644 | -0.2045696 | 0.6263258 | APOB     |
| cg12891678 | 0.204842  | -120.3019 | -0.2045918 | 0.4094338 | SPRR2D   |
| cg26523005 | 0.3435605 | -112.8375 | -0.204592  | 0.5481524 | ZNF662   |
| cg23207527 | 0.523984  | -147.4141 | -0.2046331 | 0.7286171 | RBM24    |
| cg07446572 | 0.5849887 | -180.7757 | -0.2047662 | 0.7897549 | CDCA3    |

|            |           |           |            |           |           |
|------------|-----------|-----------|------------|-----------|-----------|
| cg06882926 | 0.4085213 | -118.6298 | -0.204848  | 0.6133693 | OR1G1     |
| cg13696012 | 0.6711499 | -278.7536 | -0.2050812 | 0.8762311 | BPIL1     |
| cg13181284 | 0.6366572 | -229.4772 | -0.2051809 | 0.8418382 | KRT6B     |
| cg21312148 | 0.3252937 | -113.0564 | -0.2052091 | 0.5305029 | LCE2D     |
| cg20751395 | 0.6446698 | -239.8413 | -0.2053316 | 0.8500014 | KCNQ1     |
| cg16742703 | 0.425084  | -121.7885 | -0.2053753 | 0.6304594 | KLK3      |
| cg01899253 | 0.2462854 | -116.1413 | -0.2053864 | 0.4516717 | FLT1      |
| cg06325687 | 0.6970082 | -333.3647 | -0.2054625 | 0.9024706 | OPN1MW    |
| cg17910564 | 0.3739811 | -115.7492 | -0.2054789 | 0.57946   | VDAC3     |
| cg25677709 | 0.5359511 | -154.1642 | -0.205486  | 0.7414371 | NDST1     |
| cg11939496 | 0.4527369 | -127.2231 | -0.2054881 | 0.6582251 | CD244     |
| cg15590780 | 0.2918416 | -113.5887 | -0.2054986 | 0.4973402 | USH2A     |
| cg24908058 | 0.6352202 | -229.134  | -0.2055966 | 0.8408167 | CGB5      |
| cg03366382 | 0.5256021 | -150.0212 | -0.2056855 | 0.7312876 | INS       |
| cg11037787 | 0.6128796 | -206.0804 | -0.2057103 | 0.8185899 | PLA2G2A   |
| cg18133957 | 0.1486544 | -133.3648 | -0.2057327 | 0.3543871 | APC2      |
| cg00727947 | 0.6672321 | -275.0727 | -0.2058187 | 0.8730508 | LILRA5    |
| cg04705866 | 0.4880067 | -136.7902 | -0.2058232 | 0.6938299 | GZMK      |
| cg24433189 | 0.1695476 | -128.4517 | -0.2059251 | 0.3754727 | SSTR5     |
| cg10249734 | 0.3917103 | -118.0702 | -0.2059871 | 0.5976974 | SECTM1    |
| cg11154879 | 0.5891174 | -187.0628 | -0.2060717 | 0.7951891 | C20orf151 |
| cg27413508 | 0.2414072 | -117.4223 | -0.2061578 | 0.447565  | COX4I2    |
| cg14672680 | 0.6781704 | -296.7086 | -0.2062725 | 0.8844429 | TNNI2     |
| cg01367992 | 0.3833066 | -117.6153 | -0.2063192 | 0.5896258 | LY9       |
| cg20401945 | 0.1712275 | -128.5593 | -0.2063641 | 0.3775916 | ASPHD1    |
| cg24353217 | 0.5585726 | -167.6138 | -0.206405  | 0.7649776 | MYL2      |
| cg23110514 | 0.2498434 | -117.0057 | -0.2064611 | 0.4563045 | LCE3E     |
| cg22988566 | 0.6037399 | -200.0179 | -0.2064925 | 0.8102324 | WFDC10B   |
| cg20090497 | 0.355367  | -115.8041 | -0.2065937 | 0.5619607 | TAS2R9    |
| cg16607065 | 0.5632492 | -170.9287 | -0.2066696 | 0.7699188 | TP73      |
| cg19553721 | 0.5657281 | -172.4762 | -0.2066909 | 0.772419  | FAM106A   |

|            |           |           |            |           |          |
|------------|-----------|-----------|------------|-----------|----------|
| cg07371530 | 0.6104724 | -206.6959 | -0.2067301 | 0.8172026 | RPUSD1   |
| cg08109646 | 0.419904  | -122.8122 | -0.2067445 | 0.6266485 | ZNF683   |
| cg18809535 | 0.6381605 | -236.4525 | -0.206769  | 0.8449295 | LDHAL6B  |
| cg18192417 | 0.1752136 | -128.2289 | -0.2068391 | 0.3820527 | NEBL     |
| cg03782727 | 0.6482784 | -250.3012 | -0.2069372 | 0.8552155 | FFAR1    |
| cg14722162 | 0.4448616 | -127.6751 | -0.2069427 | 0.6518043 | C5orf20  |
| cg00308665 | 0.2560108 | -117.055  | -0.206954  | 0.4629648 | HTR2A    |
| cg02671171 | 0.3370948 | -115.4611 | -0.2069998 | 0.5440947 | RPH3AL   |
| cg18881269 | 0.4373844 | -126.2811 | -0.2070045 | 0.6443889 | LEPREL2  |
| cg16514843 | 0.3912475 | -119.3631 | -0.2070512 | 0.5982988 | PAX4     |
| cg10414946 | 0.423804  | -124.019  | -0.2071553 | 0.6309593 | MS4A2    |
| cg03931808 | 0.6797356 | -304.5097 | -0.2072996 | 0.8870353 | RLN3     |
| cg24489015 | 0.3874988 | -119.2819 | -0.2073068 | 0.5948056 | LPO      |
| cg20649991 | 0.5280616 | -154.1094 | -0.207316  | 0.7353776 | LILRB5   |
| cg15113803 | 0.6696181 | -285.5268 | -0.2073402 | 0.8769584 | RHO      |
| cg20104776 | 0.3590471 | -117.0897 | -0.2074685 | 0.5665156 | LDOC1    |
| cg27160701 | 0.3735544 | -118.2489 | -0.2075376 | 0.5810921 | SBEM     |
| cg05559445 | 0.2714891 | -116.754  | -0.2075766 | 0.4790657 | CDKN1C   |
| cg05786601 | 0.3066075 | -115.7234 | -0.2075888 | 0.5141963 | AR       |
| cg05873268 | 0.5221703 | -152.1778 | -0.2076178 | 0.7297881 | TPSAB1   |
| cg01479232 | 0.3874846 | -119.9164 | -0.2077961 | 0.5952808 | C20orf54 |
| cg09001777 | 0.4382776 | -127.6751 | -0.2078625 | 0.6461401 | FUT3     |
| cg12435792 | 0.2970656 | -116.2344 | -0.2079349 | 0.5050005 | PDE6B    |
| cg06836849 | 0.1775533 | -129.0856 | -0.2080698 | 0.3856231 | SLC17A8  |
| cg11830061 | 0.707561  | -350.469  | -0.2081577 | 0.9157187 | INSL6    |
| cg05055150 | 0.5275187 | -155.592  | -0.2082248 | 0.7357436 | MAG      |
| cg17040807 | 0.1686754 | -131.2018 | -0.2082254 | 0.3769008 | CYGB     |
| cg20692181 | 0.4071675 | -122.9144 | -0.2082276 | 0.6153951 | RETN     |
| cg09995854 | 0.4630795 | -133.8065 | -0.208274  | 0.6713535 | IL1F8    |
| cg18221897 | 0.4858996 | -140.3149 | -0.2083762 | 0.6942758 | KIR2DL1  |
| cg18429742 | 0.3804748 | -119.9631 | -0.208396  | 0.5888708 | ZDHC11   |



|            |            |           |            |           |          |
|------------|------------|-----------|------------|-----------|----------|
| cg21631409 | 0.2877513  | -117.1091 | -0.2085067 | 0.496258  | ALDH3B2  |
| cg21643361 | 0.35389    | -118.0709 | -0.2085446 | 0.5624346 | ZNF135   |
| cg04810997 | 0.4627643  | -134.3313 | -0.2086715 | 0.6714357 | TAS2R60  |
| cg09256683 | 0.3592908  | -118.577  | -0.2086778 | 0.5679686 | CCL14    |
| cg24030627 | 0.5762408  | -184.0521 | -0.2086979 | 0.7849387 | FCGBP    |
| cg24262376 | 0.331793   | -117.2821 | -0.208701  | 0.540494  | SCNM1    |
| cg27065979 | 0.5974585  | -201.009  | -0.2088808 | 0.8063393 | NEK3     |
| cg09626634 | 0.3303216  | -117.4628 | -0.2088904 | 0.539212  | EBI2     |
| cg06001166 | 0.6141227  | -216.6177 | -0.2089593 | 0.8230821 | RPL3L    |
| cg24552358 | 0.4815399  | -140.1182 | -0.2090669 | 0.6906068 | ORM1     |
| cg10710439 | 0.2354975  | -121.3784 | -0.2091994 | 0.4446968 | FLJ37549 |
| cg04511534 | 0.5438331  | -165.4612 | -0.2092237 | 0.7530569 | GGT6     |
| cg08495878 | 0.6550438  | -269.9883 | -0.2095079 | 0.8645517 | SERPINA4 |
| cg03986640 | 0.5459397  | -167.1935 | -0.2095205 | 0.7554603 | MIP      |
| cg06415153 | 0.3424119  | -118.6504 | -0.2095262 | 0.5519381 | PITPNM2  |
| cg20713492 | 0.1210853  | -146.0864 | -0.209531  | 0.3306163 | AQP10    |
| cg21652958 | 0.1007467  | -153.807  | -0.2095331 | 0.3102798 | THBS2    |
| cg05556717 | 0.3893179  | -122.5068 | -0.2096322 | 0.5989501 | CCL26    |
| cg13269964 | 0.5552626  | -172.9604 | -0.2097577 | 0.7650203 | CD300LG  |
| cg26391080 | 0.514299   | -152.9197 | -0.2098035 | 0.7241026 | SH2D4B   |
| cg07895149 | 0.05086954 | -180.0742 | -0.2098125 | 0.260682  | FAM26B   |
| cg03803009 | 0.3804965  | -121.8517 | -0.2098636 | 0.5903602 | GPR142   |
| cg24214470 | 0.4978617  | -147.0399 | -0.2100016 | 0.7078633 | SERPINF1 |
| cg14550066 | 0.3239555  | -118.6595 | -0.2100357 | 0.5339913 | NCR1     |
| cg05812599 | 0.4924637  | -145.2927 | -0.2100838 | 0.7025475 | CLPB     |
| cg21958034 | 0.5646359  | -179.5538 | -0.2100997 | 0.7747356 | MST1     |
| cg15670863 | 0.4553983  | -134.707  | -0.2101005 | 0.6654989 | SPACA4   |
| cg25203980 | 0.5997654  | -206.3144 | -0.2101141 | 0.8098795 | CENTB5   |
| cg20423977 | 0.5120962  | -152.6589 | -0.2101421 | 0.7222383 | PLAC4    |
| cg06259570 | 0.4133554  | -126.7126 | -0.2103075 | 0.6236629 | MMP27    |
| cg18356799 | 0.3144839  | -118.9114 | -0.2103544 | 0.5248383 | DSC1     |

|            |            |           |            |           |          |
|------------|------------|-----------|------------|-----------|----------|
| cg22165685 | 0.08140638 | -163.9483 | -0.2107675 | 0.2921739 | VENTX    |
| cg21529807 | 0.1185305  | -148.6042 | -0.210917  | 0.3294475 | CEACAM4  |
| cg02633817 | 0.4743912  | -141.2127 | -0.2110352 | 0.6854264 | FXVD3    |
| cg04872051 | 0.3346286  | -120.2465 | -0.2110969 | 0.5457255 | CHST7    |
| cg05379350 | 0.1909437  | -129.8725 | -0.2110995 | 0.4020432 | GIT1     |
| cg24693053 | 0.2592574  | -121.4959 | -0.2111455 | 0.4704029 | MFSD7    |
| cg14141399 | 0.29558    | -119.9631 | -0.2111692 | 0.5067493 | HAS1     |
| cg22022041 | 0.5380645  | -166.5446 | -0.2112071 | 0.7492716 | CCR9     |
| cg13882988 | 0.5547553  | -175.8891 | -0.2112178 | 0.7659731 | MBL2     |
| cg05113558 | 0.5737854  | -188.48   | -0.211227  | 0.7850124 | FOXH1    |
| cg26531804 | 0.2658991  | -121.3215 | -0.2113598 | 0.4772589 | SPINT1   |
| cg04557383 | 0.1136411  | -151.1879 | -0.2116098 | 0.3252509 | MT1H     |
| cg09237521 | 0.6563461  | -280.5189 | -0.2116351 | 0.8679812 | IFITM2   |
| cg16098726 | 0.6453733  | -263.5039 | -0.2116461 | 0.8570194 | GP9      |
| cg21570818 | 0.4982508  | -150.2259 | -0.2117392 | 0.70999   | FUT5     |
| cg06094150 | 0.5776005  | -192.5678 | -0.2117527 | 0.7893532 | MT1B     |
| cg22088368 | 0.3218666  | -120.7832 | -0.2118356 | 0.5337022 | MGC35206 |
| cg17894008 | 0.6071035  | -218.2567 | -0.2119175 | 0.819021  | NACAL    |
| cg17733331 | 0.08168285 | -165.2658 | -0.2119741 | 0.293657  | CDH3     |
| cg17446142 | 0.5433201  | -171.0543 | -0.2120245 | 0.7553446 | GDF9     |
| cg09971646 | 0.1970133  | -129.9568 | -0.2121221 | 0.4091354 | DLK1     |
| cg05341878 | 0.3282439  | -121.4764 | -0.2122868 | 0.5405307 | RIMS2    |
| cg27360282 | 0.6913626  | -350.469  | -0.2123    | 0.9036626 | RUNX3    |
| cg12610070 | 0.08018404 | -166.4167 | -0.2123196 | 0.2925036 | TSPAN15  |
| cg01474260 | 0.3865168  | -125.9763 | -0.2124799 | 0.5989967 | CESK1    |
| cg09863066 | 0.2173319  | -127.375  | -0.2125627 | 0.4298946 | PVALB    |
| cg11505080 | 0.1932025  | -131.2818 | -0.2127006 | 0.405903  | GPR173   |
| cg21365235 | 0.2296418  | -126.0399 | -0.2127274 | 0.4423692 | OCRL     |
| cg24484296 | 0.4046156  | -128.8465 | -0.212829  | 0.6174446 | ZFPL     |
| cg21745164 | 0.3223725  | -122.0125 | -0.212848  | 0.5352205 | LOC63928 |
| cg000575   | 0.3608706  | -123.9805 | -0.2128941 | 0.5737647 | GML      |

|            |            |           |            |           |           |
|------------|------------|-----------|------------|-----------|-----------|
| 93         |            |           |            |           |           |
| cg07864297 | 0.201047   | -130.1692 | -0.2129075 | 0.4139546 | ESRRB     |
| cg04740359 | 0.2762787  | -122.769  | -0.2130809 | 0.4893597 | NTF3      |
| cg26189983 | 0.1376283  | -144.8355 | -0.213117  | 0.3507454 | TNFRSF1B  |
| cg15055101 | 0.1544856  | -140.1182 | -0.2131253 | 0.3676109 | SH2D3A    |
| cg14015044 | 0.07658646 | -169.2131 | -0.2131485 | 0.289735  | TNFRSF10C |
| cg22975712 | 0.4578727  | -140.1198 | -0.2132112 | 0.6710839 | GALR3     |
| cg18783781 | 0.5575531  | -182.1955 | -0.2132328 | 0.7707858 | MGC4399   |
| cg04893119 | 0.2228675  | -127.4225 | -0.2132375 | 0.436105  | PI15      |
| cg00795812 | 0.1787919  | -134.8225 | -0.213403  | 0.392195  | PDCD1     |
| cg22789545 | 0.5447636  | -174.8768 | -0.2134242 | 0.7581878 | C20orf114 |
| cg25182621 | 0.379626   | -126.4817 | -0.2134455 | 0.5930715 | CHRD      |
| cg16176600 | 0.5210272  | -162.8111 | -0.2134973 | 0.7345245 | FRK       |
| cg12639234 | 0.3444065  | -123.6608 | -0.213506  | 0.5579125 | NAT2      |
| cg15905124 | 0.5576105  | -183.0171 | -0.2135808 | 0.7711913 | MGC13034  |
| cg18849169 | 0.4847164  | -148.7223 | -0.2135909 | 0.6983072 | GPX3      |
| cg17542495 | 0.3655609  | -125.299  | -0.2136022 | 0.5791631 | GJB1      |
| cg03599338 | 0.3813483  | -126.9122 | -0.213632  | 0.5949804 | SUSD2     |
| cg25514503 | 0.6761049  | -326.8951 | -0.2136523 | 0.8897572 | PER3      |
| cg12089698 | 0.3073692  | -122.9144 | -0.2137485 | 0.5211176 | SPATC1    |
| cg21130124 | 0.6139977  | -230.8676 | -0.2137656 | 0.8277633 | CALML5    |
| cg17788013 | 0.483533   | -148.9983 | -0.2139817 | 0.6975147 | SPINK5    |
| cg23988567 | 0.5519831  | -180.4614 | -0.214003  | 0.7659861 |           |
| cg19465374 | 0.5608659  | -186.2172 | -0.2140186 | 0.7748845 | AZGP1     |
| cg10417559 | 0.5646461  | -188.8263 | -0.2140325 | 0.7786786 | LMO6      |
| cg16175792 | 0.3318051  | -123.7801 | -0.2140659 | 0.5458711 | HSD3B1    |
| cg23749046 | 0.5741333  | -195.9214 | -0.2141452 | 0.7882785 | GPR61     |
| cg03352153 | 0.4810252  | -148.6304 | -0.2142509 | 0.6952761 | GLULD1    |
| cg12029639 | 0.2259652  | -128.2478 | -0.2142918 | 0.440257  | MAB21L1   |
| cg25993152 | 0.4889802  | -151.9273 | -0.214574  | 0.7035542 | XAGE5     |
| cg099238   | 0.3238379  | -124.2567 | -0.2146568 | 0.5384948 | HTATSF1   |

|            |            |           |            |           |           |
|------------|------------|-----------|------------|-----------|-----------|
| 55         |            |           |            |           |           |
| cg10837843 | 0.1365406  | -147.1101 | -0.2147884 | 0.351329  | DUSP1     |
| cg01530101 | 0.4131739  | -132.9903 | -0.2148096 | 0.6279835 | KCNQ1DN   |
| cg10368842 | 0.4012713  | -131.2053 | -0.2148829 | 0.6161542 | C10orf81  |
| cg21132577 | 0.1932048  | -134.0552 | -0.2151511 | 0.4083559 | MYOM2     |
| cg12040555 | 0.6773289  | -337.0627 | -0.215176  | 0.8925049 | MGMT      |
| cg10612997 | 0.4580204  | -143.4454 | -0.2152686 | 0.673289  | GREB1     |
| cg13125510 | 0.2548641  | -126.9122 | -0.2155385 | 0.4704025 | C11orf44  |
| cg15484375 | 0.4945348  | -155.6151 | -0.2155408 | 0.7100756 | SAA1      |
| cg21458041 | 0.4101068  | -133.5356 | -0.2155598 | 0.6256666 | TNP2      |
| cg11599505 | 0.5494546  | -182.4408 | -0.2155737 | 0.7650282 | C20orf102 |
| cg14528319 | 0.2101205  | -131.85   | -0.2156103 | 0.4257309 | GIPC1     |
| cg18414950 | 0.2382861  | -128.7965 | -0.2159404 | 0.4542266 | PDK3      |
| cg12949760 | 0.4785755  | -150.7576 | -0.2159554 | 0.694531  | KCNQ1     |
| cg25101056 | 0.4729202  | -148.9466 | -0.2159633 | 0.6888835 | KCNG4     |
| cg24655310 | 0.3936172  | -131.761  | -0.2160881 | 0.6097053 | CYP4F11   |
| cg02280309 | 0.4422333  | -140.7464 | -0.2160916 | 0.658325  | PKLR      |
| cg19067730 | 0.07989821 | -171.1551 | -0.2161478 | 0.296046  | PPGB      |
| cg09492887 | 0.1320534  | -150.1627 | -0.2162052 | 0.3482586 | SLC26A5   |
| cg20342105 | 0.282965   | -126.3425 | -0.2162868 | 0.4992518 | BSCL2     |
| cg11328541 | 0.1979558  | -134.707  | -0.2164336 | 0.4143894 | OR7C1     |
| cg11061975 | 0.330334   | -126.7172 | -0.2164456 | 0.5467796 | SIRPB2    |
| cg13397379 | 0.4244277  | -137.435  | -0.2164606 | 0.6408883 | OR2C3     |
| cg11237817 | 0.3882686  | -131.6173 | -0.2164993 | 0.6047679 | KIR3DL3   |
| cg14511156 | 0.2760058  | -126.9951 | -0.216635  | 0.4926409 | OSCAR     |
| cg23413307 | 0.4274972  | -138.3327 | -0.2166485 | 0.6441457 | LCE1F     |
| cg09686308 | 0.2700568  | -127.3234 | -0.2166822 | 0.486739  | CIB3      |
| cg11052143 | 0.1906442  | -136.2896 | -0.2167233 | 0.4073675 | ALS2CR11  |
| cg06825166 | 0.3177403  | -126.9705 | -0.2169519 | 0.5346922 | TMEM10    |
| cg22456522 | 0.220946   | -132.0624 | -0.2170863 | 0.4380323 | LILRB3    |
| cg19642007 | 0.4540908  | -145.3859 | -0.2171468 | 0.6712376 | TNNT3     |

|            |            |           |            |           |          |
|------------|------------|-----------|------------|-----------|----------|
| cg19987219 | 0.4439421  | -142.8197 | -0.2171555 | 0.6610975 | FLJ32011 |
| cg27329371 | 0.3348638  | -127.8965 | -0.2172309 | 0.5520948 | ALDH3A1  |
| cg15648315 | 0.5004948  | -161.3441 | -0.2173742 | 0.717869  | FLJ26443 |
| cg26757722 | 0.2485564  | -129.5863 | -0.217415  | 0.4659714 | CACNG2   |
| cg27117399 | 0.3773159  | -131.5943 | -0.217464  | 0.5947799 | CNDP1    |
| cg09037813 | 0.4414841  | -142.7724 | -0.2175033 | 0.6589874 | LRRFIP1  |
| cg04037732 | 0.2034376  | -135.0772 | -0.217542  | 0.4209796 | NLGN3    |
| cg04488758 | 0.4438677  | -143.6366 | -0.2177001 | 0.6615677 | USP44    |
| cg27257987 | 0.4292253  | -140.4255 | -0.2177957 | 0.6470209 | PSG4     |
| cg13453139 | 0.5337037  | -179.0318 | -0.2182046 | 0.7519083 | PIK3R5   |
| cg24840099 | 0.3427053  | -129.5722 | -0.2182157 | 0.5609211 | MSX1     |
| cg15140807 | 0.5233172  | -173.6963 | -0.2183293 | 0.7416465 | FLJ31222 |
| cg02202484 | 0.396992   | -135.3632 | -0.2183327 | 0.6153247 | SPRR4    |
| cg06385087 | 0.07043407 | -178.8738 | -0.2183457 | 0.2887798 | CTSZ     |
| cg01193293 | 0.3001904  | -128.5817 | -0.218394  | 0.5185844 | SIGLEC7  |
| cg07022477 | 0.3216245  | -128.9072 | -0.2184361 | 0.5400606 | HIF3A    |
| cg19154438 | 0.5554065  | -193.2907 | -0.2185379 | 0.7739443 | CKM      |
| cg19841506 | 0.1287738  | -154.3558 | -0.218887  | 0.3476608 | ZMYND15  |
| cg09229960 | 0.3646733  | -132.3376 | -0.2190202 | 0.5836935 | EMD      |
| cg24898863 | 0.168626   | -143.5893 | -0.2191253 | 0.3877513 | S100A8   |
| cg19464944 | 0.3262077  | -129.9685 | -0.2191606 | 0.5453683 | FCGR1A   |
| cg06818777 | 0.137514   | -151.9596 | -0.2191748 | 0.3566888 | CHAD     |
| cg15746187 | 0.4319582  | -143.2854 | -0.2192576 | 0.6512157 | FBXO44   |
| cg08952029 | 0.2519566  | -131.7268 | -0.2194564 | 0.471413  | CHRD12   |
| cg17699374 | 0.2414953  | -132.6909 | -0.2195336 | 0.4610289 | MGC35206 |
| cg17504145 | 0.3955919  | -136.9029 | -0.2195781 | 0.61517   | CRYBB2   |
| cg00463848 | 0.5026488  | -167.0475 | -0.2198917 | 0.7225405 | KRT2A    |
| cg18669381 | 0.2455633  | -132.761  | -0.2199    | 0.4654633 | ARHGEF19 |
| cg04431776 | 0.5819734  | -218.113  | -0.2201635 | 0.802137  | GAGE2    |
| cg04744379 | 0.5235782  | -177.7557 | -0.2201833 | 0.7437615 | KLK15    |
| cg229704   | 0.1386455  | -152.7987 | -0.220206  | 0.3588514 | SPATS1   |

|            |            |           |            |           |           |
|------------|------------|-----------|------------|-----------|-----------|
| 35         |            |           |            |           |           |
| cg27496506 | 0.5428812  | -189.1424 | -0.2202755 | 0.7631567 | TGM5      |
| cg09799714 | 0.4870093  | -161.3977 | -0.2202791 | 0.7072884 | PDZD3     |
| cg23887102 | 0.3151982  | -131.1117 | -0.2203088 | 0.5355069 | TAAR6     |
| cg21399079 | 0.6531585  | -311.7395 | -0.2203584 | 0.8735169 | GPR45     |
| cg16084788 | 0.6236766  | -264.8333 | -0.2203919 | 0.8440685 | SLC2A7    |
| cg04273431 | 0.1686375  | -145.1097 | -0.2204309 | 0.3890684 | PRR3      |
| cg04833845 | 0.3980954  | -138.578  | -0.2204728 | 0.6185682 | KCNN4     |
| cg26259865 | 0.5237428  | -178.634  | -0.2205465 | 0.7442893 | LOC124220 |
| cg10370591 | 0.3987846  | -139.0545 | -0.2207241 | 0.6195087 | TPO       |
| cg07297178 | 0.5386537  | -187.6655 | -0.2207637 | 0.7594174 | CEACAM7   |
| cg02882813 | 0.5446693  | -191.4701 | -0.2207749 | 0.7654443 | CST5      |
| cg01917648 | 0.3039936  | -131.9014 | -0.2210806 | 0.5250742 | SPIC      |
| cg05606799 | 0.4756788  | -158.8863 | -0.2211649 | 0.6968437 | KISS1     |
| cg24901474 | 0.330377   | -132.8003 | -0.2212434 | 0.5516204 | RGS5      |
| cg19353006 | 0.393215   | -138.929  | -0.2212466 | 0.6144616 | TUSC3     |
| cg11405695 | 0.3026225  | -132.095  | -0.2212477 | 0.5238702 | ATAD3C    |
| cg00895324 | 0.4847136  | -162.4635 | -0.221348  | 0.7060616 | PCP4      |
| cg20485165 | 0.4267237  | -145.4461 | -0.2214349 | 0.6481587 | WFDC12    |
| cg17412560 | 0.2654173  | -133.3119 | -0.2214994 | 0.4869167 | CSEN      |
| cg19006008 | 0.4156654  | -143.2954 | -0.2215274 | 0.6371928 | F2RL3     |
| cg15895197 | 0.178388   | -144.3481 | -0.221595  | 0.399983  | EMILIN1   |
| cg18390025 | 0.3738837  | -136.9029 | -0.2216735 | 0.5955572 | ELOVL3    |
| cg15075718 | 0.4087418  | -142.2221 | -0.2216809 | 0.6304227 | MFRP      |
| cg22077553 | 0.3868786  | -138.8002 | -0.221808  | 0.6086866 | MYOC      |
| cg12732155 | 0.2393463  | -135.7098 | -0.2219342 | 0.4612805 | LAPTM5    |
| cg15741706 | 0.4731185  | -159.3699 | -0.2219436 | 0.6950621 | CXorf48   |
| cg02786019 | 0.3606507  | -135.894  | -0.2219683 | 0.5826191 | TRPV6     |
| cg25691167 | 0.04070083 | -202.0654 | -0.2219864 | 0.2626873 | FERD3L    |
| cg10248727 | 0.5886211  | -229.4772 | -0.2219879 | 0.810609  | LCN1      |
| cg16739580 | 0.4106794  | -143.3184 | -0.2221889 | 0.6328683 | POP2      |

|            |            |           |            |           |           |
|------------|------------|-----------|------------|-----------|-----------|
| cg00601486 | 0.6705068  | -350.469  | -0.2222289 | 0.8927357 | H1T2      |
| cg27244482 | 0.2905425  | -133.3843 | -0.2222358 | 0.5127783 | CAMK2A    |
| cg19382175 | 0.5050328  | -172.9136 | -0.2223135 | 0.7273464 | PDE6A     |
| cg14893161 | 0.2538249  | -135.3    | -0.2225766 | 0.4764015 | FLJ32569  |
| cg21621114 | 0.2638891  | -134.8421 | -0.2227072 | 0.4865962 | CRX       |
| cg02812142 | 0.425649   | -147.3567 | -0.2228001 | 0.6484491 | ACMSD     |
| cg17926869 | 0.5484484  | -198.9128 | -0.2228693 | 0.7713177 | LOC115098 |
| cg01255591 | 0.5950878  | -238.8023 | -0.2229213 | 0.8180091 | R3HDML    |
| cg27550918 | 0.4675472  | -159.2038 | -0.222922  | 0.6904692 | SYNPO2L   |
| cg08390209 | 0.3627245  | -137.4501 | -0.2229614 | 0.5856858 | CDKN2B    |
| cg07595943 | 0.6938281  | -350.469  | -0.2229644 | 0.9167925 | LOC161931 |
| cg03846767 | 0.6734681  | -350.469  | -0.2230432 | 0.8965113 | TP73      |
| cg18294257 | 0.1628645  | -149.6021 | -0.223061  | 0.3859255 | SEC14L3   |
| cg19998328 | 0.3412902  | -135.9074 | -0.2231663 | 0.5644566 | LOC90580  |
| cg21148892 | 0.4825572  | -165.3569 | -0.2233499 | 0.705907  | CLEC4F    |
| cg24054653 | 0.1542472  | -152.2806 | -0.223463  | 0.3777102 | C1GALT1C1 |
| cg19000186 | 0.4452021  | -153.2951 | -0.223464  | 0.668666  | CNGA1     |
| cg02192965 | 0.4669254  | -160.0836 | -0.2235477 | 0.690473  | SLC3A1    |
| cg01185080 | 0.326295   | -135.6153 | -0.2235739 | 0.5498688 | ZNF710    |
| cg14168975 | 0.3525207  | -137.4733 | -0.2236908 | 0.5762116 | ALAS2     |
| cg14102807 | 0.4722376  | -162.1562 | -0.2236947 | 0.6959323 | CD19      |
| cg19421044 | 0.2015512  | -142.6539 | -0.223737  | 0.4252881 | DNASE1L1  |
| cg25168545 | 0.262339   | -136.1868 | -0.2237565 | 0.4860955 | GIMAP1    |
| cg22202141 | 0.3774446  | -140.4511 | -0.2238827 | 0.6013273 | FCGR3A    |
| cg24621042 | 0.3188915  | -135.8705 | -0.2239954 | 0.5428869 | SERPINA1  |
| cg26796190 | 0.05051085 | -197.9663 | -0.2240167 | 0.2745275 | PYY       |
| cg08878744 | 0.2912505  | -135.6637 | -0.224087  | 0.5153375 | LCE1B     |
| cg03291145 | 0.4203442  | -148.2392 | -0.2241066 | 0.6444508 | ARSF      |
| cg22780475 | 0.3566891  | -138.4712 | -0.2241467 | 0.5808358 | CBLC      |
| cg26813458 | 0.6407934  | -306.3069 | -0.2242641 | 0.8650575 | CEACAM6   |

|            |            |           |            |           |          |
|------------|------------|-----------|------------|-----------|----------|
| cg01248426 | 0.2081108  | -142.3241 | -0.2242933 | 0.432404  | ATP6V0D2 |
| cg14107638 | 0.4519393  | -156.7815 | -0.2243821 | 0.6763214 | MAGEA5   |
| cg04761824 | 0.4716085  | -163.2375 | -0.2244179 | 0.6960264 | 30-nov   |
| cg01375994 | 0.3303619  | -136.9883 | -0.2244889 | 0.5548508 | MXRA5    |
| cg03712237 | 0.5594022  | -211.0533 | -0.2245469 | 0.7839491 | SSX2     |
| cg15329483 | 0.3725325  | -140.7861 | -0.2245573 | 0.5970898 | SSX7     |
| cg14321743 | 0.4223771  | -149.8163 | -0.2248294 | 0.6472065 | PLA2G2D  |
| cg16792160 | 0.3340937  | -137.6855 | -0.2248518 | 0.5589455 | ASAH2    |
| cg01568736 | 0.5145674  | -183.4541 | -0.2251055 | 0.7396729 | SERPINB7 |
| cg27420123 | 0.4888001  | -171.4801 | -0.2252444 | 0.7140445 | FSHB     |
| cg23464269 | 0.3177448  | -137.4953 | -0.2252867 | 0.5430315 | UGT1A3   |
| cg05982504 | 0.4562955  | -159.9022 | -0.2254213 | 0.6817167 | IGFALS   |
| cg19787037 | 0.3232324  | -138.0302 | -0.2255231 | 0.5487555 | SPAG11   |
| cg12397274 | 0.2446659  | -139.5977 | -0.2255383 | 0.4702042 | TINAG    |
| cg17915429 | 0.4321337  | -153.4325 | -0.2256502 | 0.6577839 | PGLYRP2  |
| cg15206445 | 0.3990214  | -146.4204 | -0.2256929 | 0.6247143 | SPG7     |
| cg13859324 | 0.2747509  | -138.0455 | -0.225704  | 0.500455  | UNC45B   |
| cg27341860 | 0.665668   | -350.469  | -0.2257231 | 0.891391  | OR2L13   |
| cg04491443 | 0.644414   | -319.8184 | -0.2258722 | 0.8702862 | PDILT    |
| cg21066636 | 0.2480855  | -139.8538 | -0.2259824 | 0.474068  | TM4SF5   |
| cg20312687 | 0.3945848  | -146.1126 | -0.2260074 | 0.6205922 | DEFB118  |
| cg26062856 | 0.393006   | -146.1908 | -0.2262395 | 0.6192455 | ATP10A   |
| cg26644395 | 0.2356649  | -141.4199 | -0.226358  | 0.4620229 | UCN3     |
| cg01204985 | 0.5293819  | -195.2106 | -0.2265473 | 0.7559292 | LILRA4   |
| cg20856834 | 0.4060616  | -149.2148 | -0.226658  | 0.6327196 | OR12D3   |
| cg04891836 | 0.4178579  | -151.9273 | -0.2267911 | 0.644649  | TNFSF14  |
| cg18508525 | 0.5848864  | -240.2222 | -0.2268661 | 0.8117525 | CD36     |
| cg03608577 | 0.5489165  | -209.2832 | -0.2269486 | 0.7758651 | OR12D3   |
| cg08260891 | 0.06906583 | -190.4687 | -0.2270138 | 0.2960796 | PPGB     |
| cg12547930 | 0.3880421  | -146.6199 | -0.2270699 | 0.6151119 | WFDC6    |
| cg06731599 | 0.2264118  | -143.2954 | -0.2270923 | 0.4535041 | ATP6AP2  |



|            |            |           |            |           |          |
|------------|------------|-----------|------------|-----------|----------|
| cg14893129 | 0.6471527  | -330.546  | -0.2270989 | 0.8742516 | CARD14   |
| cg22909609 | 0.2748898  | -139.8159 | -0.2271266 | 0.5020164 | ITGBL1   |
| cg05955301 | 0.2836432  | -139.6247 | -0.2271416 | 0.5107849 | PRELP    |
| cg27337148 | 0.2093908  | -145.5461 | -0.2271637 | 0.4365545 | CAMK1G   |
| cg01353448 | 0.1494051  | -158.0739 | -0.2271987 | 0.3766038 | C7orf16  |
| cg14178895 | 0.2260703  | -143.4921 | -0.2272328 | 0.4533031 | C6orf105 |
| cg06323290 | 0.3913763  | -147.499  | -0.2272935 | 0.6186698 | HK1      |
| cg07531356 | 0.4331269  | -156.5034 | -0.2273617 | 0.6604886 | INSL6    |
| cg01072821 | 0.4005423  | -149.9449 | -0.2278243 | 0.6283666 | UNQ9391  |
| cg04245402 | 0.2704912  | -141.0752 | -0.2279941 | 0.4984854 | C19orf21 |
| cg08815403 | 0.3466347  | -142.9428 | -0.2280494 | 0.5746841 | HSD17B13 |
| cg22585988 | 0.4584843  | -165.2658 | -0.2280619 | 0.6865462 | PVRL4    |
| cg19055231 | 0.04946491 | -203.7408 | -0.2280768 | 0.2775417 | STAC     |
| cg15447486 | 0.4738173  | -171.1187 | -0.2282242 | 0.7020414 | GPR109B  |
| cg27285599 | 0.5332848  | -201.7467 | -0.2282956 | 0.7615805 | FLJ13841 |
| cg14587868 | 0.4178791  | -154.5166 | -0.2284462 | 0.6463253 | TGM1     |
| cg13552869 | 0.1691851  | -154.8778 | -0.2287038 | 0.3978889 | SEZ6L2   |
| cg07676849 | 0.3569158  | -144.8804 | -0.2287414 | 0.5856572 | FOLR3    |
| cg23216015 | 0.1517063  | -159.3902 | -0.2288068 | 0.3805131 | C7orf16  |
| cg18490846 | 0.2970306  | -141.859  | -0.2289323 | 0.5259629 | C17orf73 |
| cg18085517 | 0.3142168  | -142.5998 | -0.2292255 | 0.5434423 | TRPM1    |
| cg26504906 | 0.2535073  | -143.5538 | -0.2292751 | 0.4827824 | PRSS16   |
| cg05600717 | 0.07729743 | -188.8728 | -0.2293023 | 0.3065997 | FLJ13639 |
| cg23213217 | 0.3285882  | -143.5173 | -0.2294364 | 0.5580245 | DEGS1    |
| cg10300154 | 0.3962156  | -151.6692 | -0.2294572 | 0.6256728 | MGC5297  |
| cg14942312 | 0.4527502  | -166.0073 | -0.2295463 | 0.6822965 | GPR119   |
| cg02442161 | 0.5234693  | -198.7226 | -0.2296578 | 0.7531271 | PI3      |
| cg09142399 | 0.4262946  | -158.6364 | -0.2297082 | 0.6560028 | CRYZ     |
| cg10604646 | 0.3074246  | -143.04   | -0.2297236 | 0.5371482 | RGS5     |
| cg24824840 | 0.5601987  | -225.9615 | -0.2299104 | 0.790109  | SHANK1   |
| cg19881895 | 0.5335298  | -205.9207 | -0.2299796 | 0.7635094 | SLC43A3  |

|            |            |           |            |           |           |
|------------|------------|-----------|------------|-----------|-----------|
| cg03169180 | 0.3950013  | -152.3085 | -0.2300307 | 0.625032  | NLGN2     |
| cg06980053 | 0.259859   | -144.1233 | -0.2300327 | 0.4898917 | RASSF1    |
| cg14186992 | 0.4283528  | -159.7605 | -0.2300752 | 0.6584281 | HKR3      |
| cg11750883 | 0.3291158  | -144.5262 | -0.2301613 | 0.5592771 | C1orf42   |
| cg16242770 | 0.5318554  | -205.7489 | -0.2303655 | 0.7622209 | KRTAP17-1 |
| cg00319692 | 0.2697401  | -144.2093 | -0.2304564 | 0.5001965 | ATP6V0D2  |
| cg17240454 | 0.5694994  | -235.7678 | -0.2304621 | 0.7999614 | SPDEF     |
| cg24959428 | 0.365558   | -148.388  | -0.2304627 | 0.5960206 | GBP6      |
| cg21274025 | 0.2675284  | -144.5581 | -0.2306631 | 0.4981915 | PLA2G3    |
| cg08157292 | 0.3506113  | -147.1588 | -0.2308022 | 0.5814134 | PPP1R7    |
| cg06946880 | 0.4836191  | -180.3985 | -0.230871  | 0.7144901 | ATP6V1B1  |
| cg03379131 | 0.05504336 | -203.7453 | -0.2309271 | 0.2859704 | ADAM15    |
| cg13916742 | 0.5541123  | -224.6871 | -0.2313242 | 0.7854365 | SCGB1D1   |
| cg03879730 | 0.3447264  | -147.5306 | -0.2314657 | 0.576192  | PSMD4     |
| cg01078434 | 0.5213423  | -201.6425 | -0.2314853 | 0.7528276 | MAS1L     |
| cg24407065 | 0.5717572  | -240.962  | -0.2315086 | 0.8032658 | BLZF1     |
| cg24697329 | 0.5079069  | -194.2322 | -0.2316728 | 0.7395797 | ARHGEF4   |
| cg09864990 | 0.563418   | -233.6639 | -0.2316956 | 0.7951136 | GATA5     |
| cg05254747 | 0.5080678  | -194.3647 | -0.2316956 | 0.7397634 | SLC39A14  |
| cg24546463 | 0.2308139  | -148.6228 | -0.2317802 | 0.4625942 | MGC39715  |
| cg06226384 | 0.1723251  | -158.1263 | -0.2319027 | 0.4042277 | CACNG5    |
| cg26895595 | 0.2727143  | -146.0321 | -0.231946  | 0.5046603 | MAGEB3    |
| cg18239253 | 0.3269853  | -147.1349 | -0.2321468 | 0.559132  | DEFB32    |
| cg27383362 | 0.4226432  | -162.357  | -0.2325335 | 0.6551768 | ATAD3C    |
| cg05131835 | 0.4209841  | -161.9667 | -0.2325535 | 0.6535376 | GH2       |
| cg09038914 | 0.5201944  | -203.6998 | -0.2326812 | 0.7528756 | GFAP      |
| cg03916421 | 0.193173   | -155.1342 | -0.2328525 | 0.4260255 | LOC132321 |
| cg01718139 | 0.5328691  | -212.6636 | -0.2329248 | 0.7657939 | UNQ3033   |
| cg10784090 | 0.5369083  | -215.5983 | -0.2329547 | 0.7698629 | CLDN18    |
| cg10746737 | 0.4721704  | -179.7384 | -0.2330126 | 0.7051829 | HLA-DRB5  |

|            |           |           |            |           |          |
|------------|-----------|-----------|------------|-----------|----------|
| cg01993576 | 0.1566768 | -163.2946 | -0.2330798 | 0.3897566 | SLC29A1  |
| cg07115820 | 0.3438339 | -149.8796 | -0.2331717 | 0.5770056 | EPX      |
| cg04057858 | 0.3718692 | -153.2178 | -0.2331764 | 0.6050456 | UNQ9391  |
| cg01987509 | 0.3521137 | -150.8182 | -0.2332367 | 0.5853504 | PGR      |
| cg23444894 | 0.5094967 | -198.7176 | -0.2332936 | 0.7427903 | UNQ5810  |
| cg26884581 | 0.1640156 | -161.8373 | -0.233367  | 0.3973826 | PYGM     |
| cg21643191 | 0.3904382 | -157.3048 | -0.2338112 | 0.6242494 | ABCB5    |
| cg19971655 | 0.6606947 | -350.469  | -0.2342232 | 0.8949178 | BSND     |
| cg22082462 | 0.5194159 | -207.3249 | -0.2344349 | 0.7538508 | CPNE6    |
| cg15480475 | 0.4873033 | -189.5432 | -0.2344771 | 0.7217804 | TUB      |
| cg12332316 | 0.606167  | -292.3145 | -0.2345528 | 0.8407198 | F12      |
| cg00466436 | 0.2788324 | -149.3391 | -0.2345793 | 0.5134117 | DEFB126  |
| cg21723486 | 0.3540789 | -153.1175 | -0.234685  | 0.5887639 | TP73L    |
| cg26093687 | 0.5370523 | -220.1971 | -0.2347242 | 0.7717764 | EIF3S2   |
| cg18946226 | 0.1837406 | -159.4097 | -0.2348548 | 0.4185955 | MYR8     |
| cg24628744 | 0.169082  | -162.6466 | -0.2349898 | 0.4040718 | H2AFY    |
| cg07073964 | 0.4275088 | -167.9727 | -0.2350442 | 0.662553  | PRSSL1   |
| cg19421752 | 0.164652  | -163.817  | -0.2350898 | 0.3997418 | SLC6A18  |
| cg09207718 | 0.3315731 | -151.9364 | -0.2353383 | 0.5669113 | CYP1A2   |
| cg13320683 | 0.4267223 | -168.4836 | -0.2354748 | 0.6621972 | RHOBTB1  |
| cg09914304 | 0.5571808 | -238.8554 | -0.2355108 | 0.7926916 | PRF1     |
| cg08448751 | 0.425908  | -168.3617 | -0.2355343 | 0.6614423 | SEMA3G   |
| cg00367281 | 0.3983861 | -161.7758 | -0.2356345 | 0.6340206 | CHRN3    |
| cg27513764 | 0.4278365 | -169.1694 | -0.2356845 | 0.6635211 | EFCAB3   |
| cg19257200 | 0.5113333 | -205.3414 | -0.2357237 | 0.7470571 | SOX10    |
| cg03956628 | 0.1636852 | -164.9229 | -0.2357785 | 0.3994637 | MLH1     |
| cg09923671 | 0.4466124 | -175.4223 | -0.2358457 | 0.682458  | GATA5    |
| cg18807515 | 0.3860365 | -159.7345 | -0.2358865 | 0.621923  | PRAMEF2  |
| cg26218269 | 0.2528329 | -152.1447 | -0.2359404 | 0.4887733 | MAB21L2  |
| cg09508556 | 0.6252576 | -328.9825 | -0.2359861 | 0.8612437 | PSORS1C2 |
| cg18129786 | 0.573794  | -257.0817 | -0.2360731 | 0.8098671 | ZNF445   |

|            |           |           |            |           |           |
|------------|-----------|-----------|------------|-----------|-----------|
| cg01731341 | 0.5571908 | -240.5134 | -0.2360815 | 0.7932723 | FGF6      |
| cg22021786 | 0.4747467 | -188.2802 | -0.2366839 | 0.7114305 | WFDC8     |
| cg00673191 | 0.2103111 | -157.3381 | -0.2367302 | 0.4470413 | DOPEY2    |
| cg23704362 | 0.31117   | -152.7205 | -0.2367839 | 0.547954  | C8orf46   |
| cg03343942 | 0.300002  | -152.4041 | -0.2368031 | 0.5368052 | SLC39A5   |
| cg02164442 | 0.3529468 | -156.1535 | -0.2368369 | 0.5897837 | ITGAD     |
| cg11819637 | 0.4118724 | -166.8938 | -0.2368511 | 0.6487235 | THPO      |
| cg06906435 | 0.2992482 | -152.4665 | -0.2368651 | 0.5361133 | FLJ25773  |
| cg20584011 | 0.5806308 | -267.5251 | -0.2369241 | 0.817555  | ZDHHC11   |
| cg18521925 | 0.657185  | -350.469  | -0.2372264 | 0.8944114 | SLC22A16  |
| cg07123548 | 0.5798149 | -267.6395 | -0.2372483 | 0.8170632 | HIPK4     |
| cg02157083 | 0.3934982 | -163.4483 | -0.2373166 | 0.6308148 | APOA5     |
| cg02187357 | 0.3975996 | -164.3644 | -0.2373447 | 0.6349444 | TBC1D22B  |
| cg25778166 | 0.4874338 | -195.88   | -0.2374244 | 0.7248582 | FMO3      |
| cg20993403 | 0.5481123 | -236.3255 | -0.2374579 | 0.7855701 | EPB41L1   |
| cg02723372 | 0.5555405 | -243.326  | -0.2375815 | 0.793122  | RUNX3     |
| cg01785568 | 0.3129162 | -154.0842 | -0.2377115 | 0.5506277 | MSX1      |
| cg12999109 | 0.551048  | -239.6673 | -0.2377301 | 0.7887781 | ASAH3     |
| cg22534509 | 0.2239673 | -156.991  | -0.2377955 | 0.4617628 | GPR81     |
| cg03918304 | 0.2091624 | -158.9976 | -0.2378957 | 0.4470581 | HOXD10    |
| cg05112299 | 0.2602146 | -154.2795 | -0.2379008 | 0.4981154 | OR7A17    |
| cg17091851 | 0.2894149 | -153.9905 | -0.2381026 | 0.5275174 | LOC348174 |
| cg20781967 | 0.1982175 | -161.0235 | -0.238184  | 0.4364015 | NINJ2     |
| cg23807646 | 0.3588181 | -158.9404 | -0.2381857 | 0.5970038 | SLC26A8   |
| cg09418321 | 0.2410604 | -155.8481 | -0.2381867 | 0.4792472 | DYRK4     |
| cg06885782 | 0.2498312 | -155.4708 | -0.2383767 | 0.4882079 | KCNQ4     |
| cg11584690 | 0.1227911 | -180.5075 | -0.2384175 | 0.3612086 | ZNF574    |
| cg22038738 | 0.3296824 | -156.2153 | -0.2384651 | 0.5681474 | PLAT      |
| cg23458892 | 0.4149408 | -170.5291 | -0.2385136 | 0.6534544 | SIGLEC7   |
| cg18462653 | 0.1660181 | -168.079  | -0.2387043 | 0.4047224 | DEFB119   |
| cg251934   | 0.3684269 | -161.2496 | -0.2387905 | 0.6072175 | FLJ20186  |

|            |           |           |            |           |           |
|------------|-----------|-----------|------------|-----------|-----------|
| 94         |           |           |            |           |           |
| cg22341310 | 0.190056  | -163.8006 | -0.2392775 | 0.4293335 | ZNF541    |
| cg05330360 | 0.301807  | -156.0494 | -0.2394301 | 0.5412371 | ZBPB2     |
| cg25107791 | 0.3384545 | -158.5418 | -0.2395086 | 0.5779631 | CLPS      |
| cg26946769 | 0.541388  | -236.626  | -0.2396444 | 0.7810324 | MAPK4     |
| cg05135288 | 0.2355101 | -158.368  | -0.2397337 | 0.4752438 | RHOT2     |
| cg21505334 | 0.4901621 | -202.623  | -0.239877  | 0.7300391 | CEACAM5   |
| cg05440289 | 0.514272  | -218.3749 | -0.2404295 | 0.7547014 | IVL       |
| cg01837574 | 0.2947166 | -157.2956 | -0.2404404 | 0.535157  | TRAPPC1   |
| cg19903229 | 0.2949428 | -157.3203 | -0.2404604 | 0.5354032 | C14orf105 |
| cg02067021 | 0.4480022 | -184.9252 | -0.2405776 | 0.6885798 | DNAJC5B   |
| cg17298704 | 0.5588177 | -255.5772 | -0.2406176 | 0.7994353 | CLDN18    |
| cg15842430 | 0.3867767 | -168.2115 | -0.2410813 | 0.627858  | FAM12B    |
| cg08728865 | 0.5505217 | -248.8612 | -0.2410895 | 0.7916111 | NALP7     |
| cg03364504 | 0.6091297 | -322.8816 | -0.2411269 | 0.8502566 | FLJ36116  |
| cg07446846 | 0.5488917 | -247.6201 | -0.2411817 | 0.7900734 | SLC6A8    |
| cg02537838 | 0.5565517 | -255.3952 | -0.2413023 | 0.7978539 | C20orf151 |
| cg04713352 | 0.3348438 | -160.9356 | -0.2413767 | 0.5762205 | ATP4A     |
| cg07643942 | 0.3206114 | -159.953  | -0.2415137 | 0.5621251 | LACRT     |
| cg08626653 | 0.4694337 | -195.9214 | -0.2415659 | 0.7109996 | FLJ37538  |
| cg17803430 | 0.4244248 | -178.9957 | -0.2417209 | 0.6661457 | C4BPA     |
| cg09573795 | 0.3429434 | -162.4536 | -0.2418458 | 0.5847892 | MSX1      |
| cg18303397 | 0.2217949 | -162.486  | -0.2418576 | 0.4636526 | MBD4      |
| cg21495715 | 0.472999  | -198.7034 | -0.2420808 | 0.7150798 | SLC5A10   |
| cg12069042 | 0.4366885 | -184.0883 | -0.2422971 | 0.6789856 | PLXNB1    |
| cg14159672 | 0.1582636 | -174.6849 | -0.2423345 | 0.4005981 | FLJ32569  |
| cg05500074 | 0.464834  | -195.4826 | -0.2423487 | 0.7071827 | TSKS      |
| cg02658251 | 0.4059981 | -174.8768 | -0.2423705 | 0.6483686 | DEFB4     |
| cg15538820 | 0.6740784 | -350.469  | -0.2424057 | 0.9164841 | OBP2B     |
| cg10210238 | 0.2121375 | -164.488  | -0.2424712 | 0.4546087 | CDKN2B    |
| cg23065097 | 0.1974999 | -166.7037 | -0.242501  | 0.4400008 | FKBP1B    |

|            |           |           |            |           |           |
|------------|-----------|-----------|------------|-----------|-----------|
| cg04515986 | 0.2260182 | -162.8931 | -0.2425163 | 0.4685345 | FTHL17    |
| cg13705284 | 0.2704965 | -160.249  | -0.2425802 | 0.5130768 | ACOX2     |
| cg14652095 | 0.2684927 | -160.3165 | -0.2425975 | 0.5110902 | HIST1H1A  |
| cg27566805 | 0.2474818 | -161.4414 | -0.2427566 | 0.4902384 | USH2A     |
| cg11297236 | 0.2663648 | -160.7157 | -0.2428459 | 0.5092107 | PDILT     |
| cg08402568 | 0.4114048 | -177.3787 | -0.2429549 | 0.6543597 | MGC34647  |
| cg12954718 | 0.247919  | -161.8373 | -0.2430693 | 0.4909883 | USP6      |
| cg21453309 | 0.1904365 | -168.7897 | -0.2431801 | 0.4336165 | FAM101A   |
| cg09448880 | 0.3956542 | -173.9296 | -0.2433192 | 0.6389734 | PGLYRP3   |
| cg22983092 | 0.3522774 | -165.9476 | -0.2433562 | 0.5956336 | KRT25A    |
| cg17217677 | 0.4029818 | -176.1888 | -0.2435707 | 0.6465526 | SMPD3     |
| cg04567009 | 0.3484879 | -165.8521 | -0.2436203 | 0.5921081 | FCGR3B    |
| cg27020690 | 0.1095553 | -192.3995 | -0.2436385 | 0.3531938 | TERC      |
| cg23173910 | 0.5232614 | -232.9153 | -0.2436623 | 0.7669237 | ACTG2     |
| cg03544379 | 0.2485528 | -162.7141 | -0.243767  | 0.4923198 | OR7C2     |
| cg21519900 | 0.2856903 | -161.9327 | -0.2438761 | 0.5295665 | C20orf186 |
| cg27069753 | 0.2799405 | -162.1543 | -0.24405   | 0.5239905 | ELA3B     |
| cg09948350 | 0.5510276 | -258.3488 | -0.2440806 | 0.7951082 | FLJ25084  |
| cg16463460 | 0.2372132 | -164.2157 | -0.2442809 | 0.4814942 | WT1       |
| cg24816866 | 0.5032013 | -220.5457 | -0.2443091 | 0.7475104 | PARK2     |
| cg23765993 | 0.2361062 | -164.5518 | -0.2444631 | 0.4805694 | SPINLW1   |
| cg14934821 | 0.5747538 | -286.7419 | -0.2446855 | 0.8194393 | GPSM1     |
| cg24992780 | 0.5538051 | -263.5718 | -0.2448662 | 0.7986712 | OR7C1     |
| cg19096475 | 0.3768258 | -172.5821 | -0.244946  | 0.6217718 | ASAM      |
| cg15379858 | 0.6441248 | -350.469  | -0.2451116 | 0.8892364 | ChGn      |
| cg14902389 | 0.4768724 | -207.2202 | -0.2451409 | 0.7220133 | MGAT4A    |
| cg06531741 | 0.2904756 | -164.0804 | -0.2453489 | 0.5358245 | HTR3B     |
| cg01861509 | 0.4317928 | -188.6806 | -0.2455741 | 0.6773669 | SPOCK2    |
| cg11653864 | 0.2254426 | -167.1457 | -0.2456401 | 0.4710826 | ELK1      |
| cg19240938 | 0.5281997 | -242.2229 | -0.2456617 | 0.7738615 | SLC22A18  |
| cg041387   | 0.5349195 | -248.0652 | -0.2457111 | 0.7806306 | SPRR3     |

|            |            |           |            |           |           |
|------------|------------|-----------|------------|-----------|-----------|
| 56         |            |           |            |           |           |
| cg19481686 | 0.3840538  | -175.5132 | -0.2457956 | 0.6298494 | CDKN2B    |
| cg25087423 | 0.6636174  | -350.469  | -0.2459828 | 0.9096003 | BLR1      |
| cg06275635 | 0.3128447  | -165.9847 | -0.245998  | 0.5588427 | PGLYRP3   |
| cg25013053 | 0.4509612  | -197.3979 | -0.2462317 | 0.6971928 | UNC45B    |
| cg18530716 | 0.09467848 | -202.202  | -0.2462681 | 0.3409466 | SLC16A11  |
| cg25659818 | 0.3291696  | -167.7186 | -0.2462727 | 0.5754424 | CCL4      |
| cg16466334 | 0.4100572  | -182.9996 | -0.2462982 | 0.6563554 | MMP3      |
| cg03021690 | 0.593831   | -319.8875 | -0.2464244 | 0.8402554 | TNFAIP2   |
| cg06985415 | 0.6004899  | -331.1423 | -0.2465742 | 0.847064  | C10orf39  |
| cg00962459 | 0.3557386  | -171.724  | -0.2467032 | 0.6024418 | PROKR1    |
| cg04323365 | 0.4973292  | -222.8962 | -0.2468349 | 0.744164  | GJB1      |
| cg26385286 | 0.2258084  | -168.7457 | -0.246855  | 0.4726635 | GCNT2     |
| cg18988110 | 0.2134576  | -170.2199 | -0.2468849 | 0.4603425 | ATAD4     |
| cg11456838 | 0.2980641  | -166.9359 | -0.2471633 | 0.5452273 | LOC202459 |
| cg01053621 | 0.3207855  | -168.3559 | -0.2471961 | 0.5679817 | APOA2     |
| cg26661623 | 0.3866247  | -178.6838 | -0.2472849 | 0.6339096 | ASGR2     |
| cg12582965 | 0.6114747  | -350.469  | -0.2473949 | 0.8588696 | ATP10A    |
| cg16219122 | 0.2344775  | -168.9822 | -0.2476175 | 0.482095  | ABCB1     |
| cg01982597 | 0.4348948  | -193.9898 | -0.2477122 | 0.682607  | PGBD3     |
| cg00436603 | 0.3008222  | -167.9553 | -0.2477767 | 0.5485989 | CYP2E1    |
| cg06720660 | 0.3553964  | -173.6592 | -0.247926  | 0.6033224 | RNASE6    |
| cg00134539 | 0.4618022  | -206.0231 | -0.2480464 | 0.7098486 | UBASH3A   |
| cg27157038 | 0.5018852  | -228.981  | -0.2480952 | 0.7499803 | DNTT      |
| cg14297029 | 0.5935653  | -326.4046 | -0.2481515 | 0.8417169 | SSTR3     |
| cg01074640 | 0.3988083  | -183.2555 | -0.2481788 | 0.6469871 | IFNA17    |
| cg14034870 | 0.3353612  | -171.6161 | -0.2483779 | 0.5837391 | SFTPG     |
| cg00518911 | 0.2655599  | -168.4444 | -0.2484068 | 0.5139667 | HOXA10    |
| cg25903122 | 0.500747   | -229.0698 | -0.2484407 | 0.7491877 | MGC2747   |
| cg09546307 | 0.4259551  | -192.1683 | -0.2484415 | 0.6743965 | CLEC4D    |
| cg04719766 | 0.5353846  | -256.7187 | -0.2485443 | 0.7839289 | KCNQ1     |

|            |           |           |            |           |          |
|------------|-----------|-----------|------------|-----------|----------|
| cg13928961 | 0.4532018 | -203.1904 | -0.248583  | 0.7017848 | K6IRS3   |
| cg21207418 | 0.4829552 | -218.5247 | -0.2486781 | 0.7316332 | ACP5     |
| cg12970081 | 0.3268791 | -171.3891 | -0.2488191 | 0.5756982 | GPR32    |
| cg24816455 | 0.229274  | -171.1567 | -0.2488639 | 0.4781379 | SEMA3B   |
| cg18982568 | 0.342907  | -174.3924 | -0.2495267 | 0.5924338 | KRT1B    |
| cg15060813 | 0.2596911 | -170.505  | -0.2497362 | 0.5094273 | LRFN3    |
| cg22784047 | 0.436831  | -198.7726 | -0.2497669 | 0.6865979 | MVP      |
| cg18396533 | 0.1689048 | -182.3156 | -0.2500283 | 0.4189331 | DYDC1    |
| cg26349773 | 0.4950125 | -229.4939 | -0.2501597 | 0.7451722 | ATP6V0A4 |
| cg10787197 | 0.3211367 | -173.5085 | -0.250536  | 0.5716727 | C6orf105 |
| cg01657380 | 0.419087  | -194.3141 | -0.2507852 | 0.6698722 | NPFF     |
| cg03752087 | 0.4350218 | -200.3351 | -0.250894  | 0.6859157 | CASP14   |
| cg08784110 | 0.2888319 | -172.25   | -0.2509851 | 0.5398171 | MAS1     |
| cg13126790 | 0.4287842 | -198.1838 | -0.2510101 | 0.6797944 | FLJ27255 |
| cg01693350 | 0.2415685 | -173.1904 | -0.2510163 | 0.4925848 | WT1      |
| cg02601403 | 0.5183059 | -248.9881 | -0.2510722 | 0.7693781 | TBC1D3C  |
| cg09283007 | 0.6532625 | -350.469  | -0.2511034 | 0.9043659 | FAM47B   |
| cg13608094 | 0.61296   | -350.469  | -0.2511694 | 0.8641294 | CCND1    |
| cg22083047 | 0.2326516 | -174.1648 | -0.2512364 | 0.483888  | PRICKLE2 |
| cg19561774 | 0.6079551 | -350.469  | -0.2512907 | 0.8592458 | SLC22A2  |
| cg00075967 | 0.4639589 | -214.2221 | -0.2513033 | 0.7152622 | STRA6    |
| cg23471482 | 0.5358982 | -265.7744 | -0.2514105 | 0.7873088 | CCL22    |
| cg16899306 | 0.370281  | -182.2632 | -0.2514538 | 0.6217347 | HLA-DQB2 |
| cg07173760 | 0.2599814 | -172.9883 | -0.2514854 | 0.5114667 | CLC      |
| cg15914863 | 0.5425782 | -272.978  | -0.2515869 | 0.7941651 | CYP2W1   |
| cg11346450 | 0.4750205 | -221.1575 | -0.2517585 | 0.726779  | UGT1A3   |
| cg08292050 | 0.5060157 | -241.7079 | -0.2519338 | 0.7579495 | SOCS4    |
| cg18056600 | 0.1128821 | -202.202  | -0.2520581 | 0.3649402 | ZMYND15  |
| cg06437862 | 0.5080656 | -243.5998 | -0.2520648 | 0.7601305 | TUBA2    |
| cg01144251 | 0.4812288 | -225.5498 | -0.2520828 | 0.7333116 | KLK9     |
| cg18920397 | 0.450542  | -209.5667 | -0.2521673 | 0.7027093 | LY9      |



|                |           |           |            |           |              |
|----------------|-----------|-----------|------------|-----------|--------------|
| cg132719<br>51 | 0.272992  | -173.9083 | -0.2522524 | 0.5252445 | FAM57B       |
| cg038607<br>68 | 0.3915631 | -188.8807 | -0.2523434 | 0.6439065 | BLK          |
| cg079774<br>90 | 0.4364668 | -203.8423 | -0.2523628 | 0.6888297 | C16orf45     |
| cg087661<br>49 | 0.4336153 | -202.8068 | -0.2524091 | 0.6860244 | GZMB         |
| cg155894<br>27 | 0.4820145 | -227.0702 | -0.2525258 | 0.7345403 | MUC4         |
| cg074268<br>48 | 0.4598409 | -214.8225 | -0.2525346 | 0.7123755 | S100A3       |
| cg114724<br>24 | 0.4133179 | -195.8745 | -0.2526162 | 0.6659341 | PFKFB1       |
| cg185332<br>25 | 0.4365512 | -204.5991 | -0.2527046 | 0.6892558 | KLHDC7B      |
| cg120226<br>21 | 0.2978632 | -175.4437 | -0.2528761 | 0.5507392 | LAX1         |
| cg190335<br>55 | 0.3333549 | -178.8177 | -0.2530341 | 0.5863889 | DEFB1        |
| cg006890<br>10 | 0.4006442 | -193.9359 | -0.2536785 | 0.6543227 | NCSTN        |
| cg231145<br>94 | 0.455311  | -215.3301 | -0.2537924 | 0.7091034 | C10orf30     |
| cg130190<br>92 | 0.478888  | -228.4473 | -0.2538905 | 0.7327785 | PDZK1        |
| cg148266<br>83 | 0.2867484 | -176.619  | -0.253939  | 0.5406874 | SPRR2D       |
| cg050780<br>19 | 0.2828536 | -176.7846 | -0.2541154 | 0.536969  | PDE6B        |
| cg237768<br>92 | 0.522525  | -261.439  | -0.2541476 | 0.7766726 | MAGEA1       |
| cg219644<br>81 | 0.4046157 | -196.0096 | -0.2541641 | 0.6587797 | SLC34A3      |
| cg248880<br>49 | 0.2036866 | -181.6637 | -0.2542319 | 0.4579185 | FES          |
| cg244890<br>34 | 0.4367154 | -207.99   | -0.2543154 | 0.6910307 | LW-1         |
| cg217557<br>09 | 0.222721  | -179.519  | -0.25435   | 0.477071  | C21orf124    |
| cg163587<br>38 | 0.4700245 | -224.5353 | -0.2544258 | 0.7244502 | AGXT         |
| cg088596<br>75 | 0.3760654 | -189.1106 | -0.2546256 | 0.6306909 | PDE4A        |
| cg256457<br>48 | 0.3890903 | -192.7717 | -0.254829  | 0.6439193 | AKAP14       |
| cg056960<br>92 | 0.2299233 | -179.5553 | -0.2548561 | 0.4847794 | NOSIP        |
| cg250729<br>62 | 0.3704724 | -188.2802 | -0.2548618 | 0.6253342 | MGC3529<br>5 |
| cg088340<br>18 | 0.2631145 | -177.9915 | -0.2549482 | 0.5180627 | PRODH        |
| cg017267<br>67 | 0.3634303 | -187.1849 | -0.2550918 | 0.6185221 | LALBA        |
| cg066257<br>67 | 0.5171898 | -259.8574 | -0.2552256 | 0.7724154 | F12          |
| cg244776<br>36 | 0.306934  | -179.6842 | -0.2552442 | 0.5621782 | OR10H1       |
| cg240276<br>79 | 0.5204741 | -263.527  | -0.2554898 | 0.7759639 | SLC2A7       |
| cg211688       | 0.4956901 | -243.6919 | -0.2555763 | 0.7512664 | C6orf122     |

|            |           |           |            |           |           |
|------------|-----------|-----------|------------|-----------|-----------|
| 84         |           |           |            |           |           |
| cg19372178 | 0.2150873 | -182.7201 | -0.2560424 | 0.4711297 | TMEM16G   |
| cg20822628 | 0.6734058 | -350.469  | -0.256205  | 0.9296108 | GATA5     |
| cg25477904 | 0.5516633 | -298.4139 | -0.2562312 | 0.8078945 | PSG1      |
| cg06489008 | 0.2970546 | -180.5617 | -0.2562355 | 0.55329   | CST11     |
| cg01550148 | 0.2911688 | -180.3372 | -0.2562623 | 0.5474311 | H2AFY     |
| cg00684178 | 0.471098  | -229.6548 | -0.2563681 | 0.7274661 | NEU4      |
| cg18473117 | 0.4413993 | -214.7406 | -0.2565359 | 0.6979352 | CCDC22    |
| cg22220722 | 0.516949  | -263.5109 | -0.2565585 | 0.7735075 | PLA2G2A   |
| cg17386181 | 0.4762729 | -233.5023 | -0.2566814 | 0.7329543 | MT1B      |
| cg25141490 | 0.2464841 | -181.2068 | -0.2567779 | 0.503262  | IL17B     |
| cg24743310 | 0.591197  | -350.469  | -0.2568502 | 0.8480471 | FLJ31196  |
| cg20576002 | 0.3515007 | -188.4861 | -0.2571746 | 0.6086753 | FAM112B   |
| cg24851490 | 0.247068  | -181.7743 | -0.2571788 | 0.5042468 | RNASE2    |
| cg23075286 | 0.3679128 | -191.9128 | -0.2572365 | 0.6251493 | GALP      |
| cg08420900 | 0.600529  | -350.469  | -0.2575591 | 0.858088  | LW-1      |
| cg04968473 | 0.300234  | -182.8326 | -0.2575658 | 0.5577998 | CYP1A2    |
| cg22971191 | 0.259192  | -181.9662 | -0.2575839 | 0.516776  | SLC10A2   |
| cg20095587 | 0.4570144 | -224.9397 | -0.2576939 | 0.7147083 | TREM2     |
| cg03055440 | 0.3891114 | -198.6098 | -0.2579857 | 0.6470971 | MS4A6A    |
| cg07220939 | 0.3666997 | -193.0943 | -0.2580534 | 0.6247531 | SLC22A12  |
| cg08996986 | 0.4200295 | -209.0726 | -0.2580968 | 0.6781263 | EPS8L1    |
| cg22189286 | 0.4325705 | -214.7584 | -0.2583822 | 0.6909527 | HSPB8     |
| cg06142324 | 0.3757302 | -195.8142 | -0.2583958 | 0.634126  | FLJ25530  |
| cg24429836 | 0.201429  | -187.9692 | -0.258433  | 0.459862  | LDHD      |
| cg00714377 | 0.1392918 | -201.8851 | -0.2585455 | 0.3978373 | SLA2      |
| cg08093398 | 0.3934182 | -200.928  | -0.2585501 | 0.6519684 | PSF1      |
| cg09447105 | 0.5798902 | -347.2225 | -0.2585836 | 0.8384738 | PDE6H     |
| cg15903395 | 0.3963731 | -201.8981 | -0.2586021 | 0.6549752 | FLJ25369  |
| cg22013966 | 0.5823739 | -350.469  | -0.2586112 | 0.8409851 | SERPINA13 |
| cg21122774 | 0.472607  | -236.4069 | -0.2588    | 0.7314069 | SARDH     |

|            |           |           |            |           |           |
|------------|-----------|-----------|------------|-----------|-----------|
| cg20189782 | 0.4508843 | -224.3942 | -0.2588555 | 0.7097399 | MGC27121  |
| cg09426307 | 0.3881746 | -200.7607 | -0.2592744 | 0.647449  | SEC14L3   |
| cg17095731 | 0.3836071 | -199.5312 | -0.2593061 | 0.6429132 | LRP8      |
| cg18231267 | 0.6246328 | -350.469  | -0.2593465 | 0.8839793 | RUNX3     |
| cg02694395 | 0.285348  | -184.9554 | -0.2594073 | 0.5447552 | FMO4      |
| cg00042156 | 0.3353192 | -190.5684 | -0.2599726 | 0.5952918 | MGC16291  |
| cg01970325 | 0.277803  | -185.8924 | -0.2601439 | 0.5379469 | NELF      |
| cg22247240 | 0.3487194 | -193.177  | -0.2601794 | 0.6088988 | C14orf115 |
| cg10125195 | 0.4302162 | -217.6325 | -0.2602237 | 0.6904398 | LACRT     |
| cg17264470 | 0.594126  | -350.469  | -0.2602262 | 0.8543522 | FGF21     |
| cg23753610 | 0.6697737 | -350.469  | -0.2604167 | 0.9301904 | DNAHL1    |
| cg06351503 | 0.4261608 | -216.4185 | -0.2604675 | 0.6866283 | RDBP      |
| cg13726463 | 0.4765437 | -245.7687 | -0.2615245 | 0.7380682 | COX6A2    |
| cg24363955 | 0.523945  | -285.492  | -0.2616205 | 0.7855654 | FLJ14054  |
| cg19728577 | 0.5110757 | -273.868  | -0.2618805 | 0.7729563 | GUCA2B    |
| cg02324920 | 0.2632822 | -188.4749 | -0.2618917 | 0.5251739 | NEURL     |
| cg26420196 | 0.2101865 | -191.8644 | -0.2619399 | 0.4721264 | GAS6      |
| cg26415633 | 0.2056006 | -192.5482 | -0.2620153 | 0.4676159 | KLK1      |
| cg07950803 | 0.2450307 | -189.3452 | -0.2621948 | 0.5072255 | CD1A      |
| cg24623694 | 0.1951702 | -194.5628 | -0.262372  | 0.4575422 | PRX       |
| cg05636175 | 0.1674595 | -200.2601 | -0.2626902 | 0.4301497 | TNFRSF10C |
| cg27418851 | 0.3963546 | -210.127  | -0.2628559 | 0.6592104 | MBL2      |
| cg10490064 | 0.4525074 | -235.1288 | -0.2631733 | 0.7156807 | CRYBB2    |
| cg16272420 | 0.4574497 | -238.1383 | -0.2632618 | 0.7207115 | PNLIPRP2  |
| cg23873703 | 0.5164387 | -283.136  | -0.263265  | 0.7797037 | KCNAB1    |
| cg00392257 | 0.3396089 | -196.9959 | -0.2633263 | 0.6029352 | ISG20L2   |
| cg23580945 | 0.4864501 | -257.8185 | -0.2634188 | 0.7498689 | FLJ43826  |
| cg08341924 | 0.4947991 | -264.6557 | -0.2635272 | 0.7583263 | TGM1      |
| cg03872376 | 0.3723267 | -204.7002 | -0.2637119 | 0.6360386 | ZP4       |
| cg27377450 | 0.5430413 | -314.2912 | -0.2637666 | 0.8068079 | ARHGEF18  |

|            |            |           |            |           |           |
|------------|------------|-----------|------------|-----------|-----------|
| cg21402035 | 0.3383627  | -197.6902 | -0.2638409 | 0.6022036 | GALR3     |
| cg27090216 | 0.09419132 | -226.3992 | -0.2638991 | 0.3580904 | TNFRSF10C |
| cg17192247 | 0.09344193 | -226.793  | -0.2639394 | 0.3573814 | MAPRE3    |
| cg00941549 | 0.4039969  | -215.2363 | -0.2640862 | 0.6680831 | AKAP4     |
| cg17687962 | 0.4731542  | -250.1533 | -0.2641241 | 0.7372782 | KLK3      |
| cg04816348 | 0.6021244  | -350.469  | -0.2641432 | 0.8662676 | CLEC4G    |
| cg20011352 | 0.0900793  | -228.9249 | -0.2643433 | 0.3544226 | GPR124    |
| cg25915982 | 0.5115225  | -281.7162 | -0.2643436 | 0.7758661 | GRB10     |
| cg17001430 | 0.4744905  | -252.2012 | -0.2645606 | 0.7390511 | KIF25     |
| cg15711744 | 0.4976214  | -270.9095 | -0.2649019 | 0.7625234 | ANP32D    |
| cg08887581 | 0.4313168  | -228.4076 | -0.2649466 | 0.6962634 | C1orf64   |
| cg26473272 | 0.6019943  | -350.469  | -0.2653947 | 0.867389  | SYT8      |
| cg18138484 | 0.5603299  | -344.6118 | -0.2654948 | 0.8258247 | CABP2     |
| cg12061127 | 0.4032373  | -217.8873 | -0.2655274 | 0.6687647 | WFDC9     |
| cg20488657 | 0.4256143  | -227.3873 | -0.2656832 | 0.6912975 | TFF3      |
| cg21038703 | 0.3919985  | -214.3934 | -0.2657152 | 0.6577138 | ASB16     |
| cg11070419 | 0.2822882  | -194.8604 | -0.2657251 | 0.5480133 | C4BPA     |
| cg13530039 | 0.26776    | -194.6775 | -0.2658734 | 0.5336334 | CHRM1     |
| cg00415993 | 0.1858257  | -201.2009 | -0.2659039 | 0.4517296 | F2RL2     |
| cg10408410 | 0.445033   | -237.814  | -0.266052  | 0.711085  | RLBP1     |
| cg00350478 | 0.3383234  | -202.0586 | -0.2663552 | 0.6046786 | FRMD1     |
| cg00622552 | 0.1129912  | -221.9673 | -0.2664249 | 0.379416  | ODF3L1    |
| cg19384697 | 0.2339588  | -196.6249 | -0.2666249 | 0.5005838 | UPK3B     |
| cg08453096 | 0.5591764  | -347.7715 | -0.266716  | 0.8258924 | ABCG5     |
| cg02833725 | 0.3855561  | -214.5343 | -0.2668406 | 0.6523967 | ISG20L2   |
| cg25462291 | 0.09892453 | -228.785  | -0.2671052 | 0.3660297 | HEYL      |
| cg14150666 | 0.5678192  | -350.469  | -0.2676107 | 0.8354299 | IL8RB     |
| cg19226099 | 0.2856591  | -198.1333 | -0.2676557 | 0.5533149 | MC3R      |
| cg23881725 | 0.1617249  | -209.1197 | -0.2679588 | 0.4296838 | DLEC1     |
| cg01305625 | 0.2605624  | -198.1258 | -0.2681008 | 0.5286632 | PDLIM4    |
| cg221901   | 0.4472305  | -244.034  | -0.2681509 | 0.7153814 | NALP8     |

|            |           |           |            |           |           |
|------------|-----------|-----------|------------|-----------|-----------|
| 14         |           |           |            |           |           |
| cg04048249 | 0.3896054 | -218.5119 | -0.268203  | 0.6578084 | APOC3     |
| cg21450627 | 0.5474451 | -336.5656 | -0.2682137 | 0.8156587 | PSD4      |
| cg05556202 | 0.4897697 | -273.915  | -0.2682496 | 0.7580193 | TM4SF19   |
| cg16673198 | 0.3691917 | -212.596  | -0.2683289 | 0.6375206 | CPNE4     |
| cg03752885 | 0.2565101 | -198.9524 | -0.268638  | 0.5251481 | DAPK3     |
| cg21407055 | 0.5179369 | -302.5053 | -0.268835  | 0.7867719 | ART1      |
| cg11884243 | 0.52402   | -310.2112 | -0.2691101 | 0.7931302 | FCN2      |
| cg17829936 | 0.4159941 | -231.2552 | -0.2694478 | 0.6854419 | TAAR5     |
| cg25033144 | 0.4631173 | -257.4015 | -0.2695189 | 0.7326362 | FLJ00060  |
| cg18121684 | 0.4103693 | -229.4939 | -0.2697313 | 0.6801006 | SERPINB13 |
| cg06277277 | 0.2157061 | -202.9239 | -0.2698414 | 0.4855476 | NR1I3     |
| cg11161873 | 0.2654936 | -201.1889 | -0.2700083 | 0.535502  | FLJ39575  |
| cg03468463 | 0.375702  | -217.8812 | -0.2700992 | 0.6458012 | SERPINB12 |
| cg08603768 | 0.3859621 | -221.1645 | -0.2701196 | 0.6560817 | WNT8A     |
| cg10986043 | 0.2568996 | -201.3929 | -0.2701824 | 0.527082  | TCAP      |
| cg18204685 | 0.4158792 | -232.8926 | -0.2702098 | 0.686089  | BTD       |
| cg05654163 | 0.3601753 | -214.0182 | -0.2703059 | 0.6304811 | SLC39A2   |
| cg00520135 | 0.5850471 | -350.469  | -0.2704716 | 0.8555187 | TPM1      |
| cg24919884 | 0.3874526 | -222.461  | -0.2705154 | 0.657968  | ARHGEF16  |
| cg12113132 | 0.2770408 | -202.362  | -0.2705479 | 0.5475886 | CCNDBP1   |
| cg16051685 | 0.4646289 | -261.28   | -0.2705956 | 0.7352245 | TRIM63    |
| cg24910675 | 0.1435033 | -217.7036 | -0.2706078 | 0.4141111 | ENG       |
| cg17582777 | 0.3487559 | -211.8756 | -0.2706386 | 0.6193945 | EFNA3     |
| cg03458191 | 0.4788628 | -272.1026 | -0.2707046 | 0.7495673 | SAA1      |
| cg14036856 | 0.2917149 | -203.7798 | -0.2708687 | 0.5625836 | MGC52423  |
| cg22228134 | 0.3100502 | -205.8798 | -0.2709991 | 0.5810493 | GZMH      |
| cg01459162 | 0.5187187 | -310.6497 | -0.271014  | 0.7897327 | PADI3     |
| cg14366490 | 0.3665084 | -217.0895 | -0.2710498 | 0.6375582 | TXNL6     |
| cg04457051 | 0.3335934 | -210.0453 | -0.2713194 | 0.6049128 | SCOC      |
| cg22294577 | 0.5330402 | -328.9382 | -0.2713354 | 0.8043756 | SLC26A3   |

|            |           |           |            |           |           |
|------------|-----------|-----------|------------|-----------|-----------|
| cg24506604 | 0.4350434 | -245.1766 | -0.2714458 | 0.7064892 | LOC144501 |
| cg05093686 | 0.2050186 | -206.7971 | -0.2716223 | 0.4766409 | MAB21L1   |
| cg26422060 | 0.5143065 | -308.1748 | -0.2717351 | 0.7860416 | TBX10     |
| cg13960126 | 0.3694419 | -219.3238 | -0.2717857 | 0.6412276 | CRB3      |
| cg03782453 | 0.1125455 | -229.8505 | -0.2718374 | 0.3843829 | FLJ90575  |
| cg04953015 | 0.4416723 | -250.234  | -0.2720069 | 0.7136792 | CHRNA2    |
| cg25982743 | 0.1646797 | -214.8225 | -0.2723353 | 0.437015  | TIMP4     |
| cg02351381 | 0.1916922 | -209.9772 | -0.2725022 | 0.4641945 | C12orf34  |
| cg15782391 | 0.2960484 | -206.9271 | -0.2725101 | 0.5685586 | ACPT      |
| cg11435943 | 0.2463514 | -205.7734 | -0.2728633 | 0.5192146 | SERPINB12 |
| cg19982860 | 0.3565557 | -218.0323 | -0.27292   | 0.6294757 | IFNA21    |
| cg12992720 | 0.1915257 | -211.1852 | -0.2733099 | 0.4648356 | EDG4      |
| cg14911395 | 0.1975895 | -210.3238 | -0.2733194 | 0.4709089 | SEMA3B    |
| cg23514672 | 0.5993263 | -350.469  | -0.2733511 | 0.8726774 | FLJ32871  |
| cg22805308 | 0.2504524 | -206.4786 | -0.2733615 | 0.5238139 | PLEKHG5   |
| cg07597976 | 0.3119079 | -210.2454 | -0.2733864 | 0.5852943 | CD19      |
| cg19717326 | 0.1739146 | -214.5343 | -0.2734389 | 0.4473534 | MYADM     |
| cg11739626 | 0.4268191 | -245.7746 | -0.2735413 | 0.7003604 | AKT1S1    |
| cg21985470 | 0.2608606 | -207.9341 | -0.2742492 | 0.5351098 | PKLR      |
| cg00174500 | 0.2099629 | -210.5802 | -0.2744811 | 0.4844441 | CMTM5     |
| cg18223379 | 0.2442207 | -209.3558 | -0.2750837 | 0.5193044 | BPIL3     |
| cg16545105 | 0.3818629 | -230.0819 | -0.2751986 | 0.6570615 | CRHBP     |
| cg19233472 | 0.4470837 | -261.7956 | -0.275271  | 0.7223547 | FOXI1     |
| cg15422147 | 0.4131543 | -243.091  | -0.2752992 | 0.6884536 | SERPINB5  |
| cg24825722 | 0.3202558 | -215.1977 | -0.2754617 | 0.5957175 | ACADVL    |
| cg24852661 | 0.1151843 | -234.3016 | -0.275599  | 0.3907833 | GOLPH2    |
| cg00644033 | 0.6414136 | -350.469  | -0.2761528 | 0.9175664 | MUC3B     |
| cg05671018 | 0.4032263 | -240.5134 | -0.2761557 | 0.679382  | LYSMD2    |
| cg25020204 | 0.3014529 | -214.7228 | -0.2766739 | 0.5781268 | DBH       |
| cg00321478 | 0.3797718 | -232.5508 | -0.2767251 | 0.6564969 | CRB1      |
| cg046373   | 0.326248  | -218.6564 | -0.2768114 | 0.6030594 | FLJ32784  |

|            |            |           |            |           |          |
|------------|------------|-----------|------------|-----------|----------|
| 72         |            |           |            |           |          |
| cg02981703 | 0.5328804  | -350.469  | -0.2771741 | 0.8100545 | CA6      |
| cg08972170 | 0.2793976  | -213.7938 | -0.2773078 | 0.5567054 | Ells1    |
| cg02218324 | 0.3725599  | -231.5379 | -0.2774215 | 0.6499814 | RSHL1    |
| cg18967533 | 0.261448   | -213.9401 | -0.277874  | 0.539322  | KLK6     |
| cg04574507 | 0.370989   | -232.091  | -0.2779374 | 0.6489264 | CD1B     |
| cg20311730 | 0.3498144  | -226.6553 | -0.2782599 | 0.6280743 | NALP10   |
| cg12951282 | 0.3321485  | -222.5885 | -0.2782963 | 0.6104448 | ASGR2    |
| cg06958211 | 0.3189024  | -220.3961 | -0.278459  | 0.5973614 | PAK6     |
| cg05921699 | 0.3547309  | -228.8716 | -0.2787173 | 0.6334482 | CD79A    |
| cg07922606 | 0.2160703  | -216.9141 | -0.278886  | 0.4949563 | HIST1H3E |
| cg00626119 | 0.2578932  | -215.5106 | -0.2788933 | 0.5367865 | NTRK1    |
| cg06303238 | 0.3733299  | -234.8929 | -0.2789036 | 0.6522335 | SALL4    |
| cg15303841 | 0.3221534  | -221.8912 | -0.2789561 | 0.6011094 | RFPL1    |
| cg15743985 | 0.4250975  | -259.2743 | -0.2794965 | 0.704594  | CD22     |
| cg21639401 | 0.3843788  | -240.2838 | -0.2795619 | 0.6639407 | FLJ31222 |
| cg10779183 | 0.4625717  | -284.4727 | -0.2796093 | 0.7421809 | ELA3A    |
| cg04337944 | 0.1989488  | -220.0568 | -0.2797503 | 0.4786991 | FBLN1    |
| cg24331162 | 0.4346772  | -265.6363 | -0.2797863 | 0.7144635 | SYT8     |
| cg06244417 | 0.4949653  | -314.2912 | -0.2798207 | 0.774786  | FCN1     |
| cg25372195 | 0.3782415  | -238.5875 | -0.2798408 | 0.6580823 | DCD      |
| cg24884084 | 0.150214   | -230.1787 | -0.2803144 | 0.4305283 | SPRR1B   |
| cg06233503 | 0.2835387  | -219.4741 | -0.2804668 | 0.5640055 | KCNQ1    |
| cg10213812 | 0.582496   | -350.469  | -0.2805152 | 0.8630112 | FOXP1    |
| cg03548857 | 0.180439   | -224.3152 | -0.2806796 | 0.4611185 | FFAR2    |
| cg03973663 | 0.1508814  | -231.0237 | -0.2809725 | 0.4318539 | LYN      |
| cg24541550 | 0.2919581  | -222.0546 | -0.281466  | 0.5734241 | MRVI1    |
| cg22627427 | 0.5636422  | -350.469  | -0.2814867 | 0.8451289 | C11orf9  |
| cg01663968 | 0.06200653 | -268.9789 | -0.2815111 | 0.3435176 | CTS2     |
| cg26583078 | 0.3793765  | -243.091  | -0.2817276 | 0.6611041 | SORBS2   |
| cg09458237 | 0.4121009  | -258.8009 | -0.2821811 | 0.694282  | HSPA12B  |

|            |           |           |            |           |           |
|------------|-----------|-----------|------------|-----------|-----------|
| cg10071275 | 0.2983076 | -224.233  | -0.282233  | 0.5805405 | MYT1      |
| cg07484827 | 0.2184968 | -222.0773 | -0.282257  | 0.5007538 | CHRNA10   |
| cg22158923 | 0.2342943 | -221.3058 | -0.2822893 | 0.5165837 | FLJ39237  |
| cg19047670 | 0.3862455 | -247.3097 | -0.28242   | 0.6686655 | CCND1     |
| cg26581729 | 0.1695907 | -229.9123 | -0.2830366 | 0.4526273 | NPDC1     |
| cg25882366 | 0.1012537 | -251.2368 | -0.2831535 | 0.3844072 | HOXB2     |
| cg01772980 | 0.3407107 | -234.0951 | -0.2832602 | 0.6239709 | SCGB1D1   |
| cg12850636 | 0.4316413 | -272.9081 | -0.283335  | 0.7149763 | TJP3      |
| cg06236276 | 0.4745902 | -306.2483 | -0.2835126 | 0.7581028 | SLC22A2   |
| cg00594952 | 0.2814094 | -224.7192 | -0.2835425 | 0.564952  | RIMS3     |
| cg21129531 | 0.5376345 | -350.469  | -0.2837171 | 0.8213516 | LRRC4     |
| cg19859270 | 0.3990905 | -256.3125 | -0.2838551 | 0.6829456 | GPR15     |
| cg17778867 | 0.392306  | -253.6482 | -0.2840637 | 0.6763697 | KRTAP10-8 |
| cg19910382 | 0.311208  | -230.0437 | -0.2844008 | 0.5956088 | FABP1     |
| cg27622610 | 0.2240705 | -225.3578 | -0.2844642 | 0.5085348 | OR1G1     |
| cg09300114 | 0.1822392 | -229.8939 | -0.2844928 | 0.466732  | SLC16A5   |
| cg10322876 | 0.3389809 | -236.16   | -0.2845002 | 0.6234811 | CYP2B6    |
| cg01484156 | 0.2654594 | -225.5889 | -0.2846653 | 0.5501247 | NCALD     |
| cg25400358 | 0.2779229 | -226.793  | -0.284882  | 0.5628049 | GPR137    |
| cg23260026 | 0.2213237 | -226.3992 | -0.2850023 | 0.506326  | FSTL3     |
| cg19623751 | 0.3314493 | -236.3255 | -0.2855172 | 0.6169665 | CEACAM7   |
| cg04962134 | 0.3138452 | -233.9226 | -0.2861958 | 0.600041  | TRIM51    |
| cg23278885 | 0.4186796 | -272.9428 | -0.2864085 | 0.7050881 | TGM6      |
| cg05700681 | 0.5042711 | -347.7397 | -0.2864313 | 0.7907025 | CCL22     |
| cg00750606 | 0.2530096 | -228.2885 | -0.2864758 | 0.5394855 | CDA       |
| cg12781568 | 0.2704202 | -229.1467 | -0.2865468 | 0.556967  | WT1       |
| cg05569220 | 0.2938877 | -231.4275 | -0.286551  | 0.5804387 | FLJ44861  |
| cg13694749 | 0.3979414 | -262.322  | -0.286616  | 0.6845574 | SCN4A     |
| cg18242139 | 0.42658   | -278.8625 | -0.2868308 | 0.7134107 | ELAVL4    |
| cg08244028 | 0.3655253 | -250.6076 | -0.2875309 | 0.6530562 | MSH3      |
| cg13656062 | 0.4638909 | -311.0428 | -0.2882069 | 0.7520977 | CYP4F2    |



|            |            |           |            |           |          |
|------------|------------|-----------|------------|-----------|----------|
| cg00334507 | 0.336059   | -242.9607 | -0.2882439 | 0.6243029 | MVP      |
| cg09299388 | 0.4087616  | -272.1511 | -0.2883258 | 0.6970874 | PGK2     |
| cg19985911 | 0.4675846  | -315.7811 | -0.2886543 | 0.7562389 | AVIL     |
| cg09467501 | 0.08321916 | -268.4623 | -0.288894  | 0.3721131 | PYY      |
| cg03104936 | 0.349359   | -248.1847 | -0.2889345 | 0.6382935 | GRB10    |
| cg13053608 | 0.2217613  | -233.3308 | -0.2892288 | 0.5109901 | LGP1     |
| cg17820828 | 0.4348981  | -292.0787 | -0.2896423 | 0.7245404 | KCNQ1    |
| cg19368582 | 0.3569968  | -253.0837 | -0.2900355 | 0.6470323 | MMRN2    |
| cg19712821 | 0.2759593  | -237.3123 | -0.2908392 | 0.5667985 | KSP37    |
| cg02717866 | 0.3605849  | -256.2002 | -0.2908547 | 0.6514395 | FLJ32771 |
| cg05912121 | 0.3684546  | -260.7738 | -0.2915477 | 0.6600023 | TH       |
| cg22575540 | 0.4639342  | -322.7798 | -0.2919251 | 0.7558594 | TRIM54   |
| cg12334759 | 0.4059143  | -279.9907 | -0.2920558 | 0.6979702 | C19orf19 |
| cg21432842 | 0.2462023  | -237.8602 | -0.292085  | 0.5382873 | CSF3     |
| cg09701102 | 0.4607534  | -321.2265 | -0.2923684 | 0.7531219 | NDUFV1   |
| cg10677144 | 0.4188025  | -288.8155 | -0.2924452 | 0.7112477 | MYOM1    |
| cg07412254 | 0.3390306  | -252.5694 | -0.2924674 | 0.631498  | FLJ14816 |
| cg12775613 | 0.3366755  | -252.0372 | -0.2925326 | 0.6292081 | HTR1F    |
| cg02844051 | 0.4434413  | -307.5853 | -0.2927933 | 0.7362346 | ZD52F10  |
| cg18063149 | 0.3974466  | -277.2419 | -0.2928142 | 0.6902608 | FMO3     |
| cg07408456 | 0.3136784  | -247.2138 | -0.2929843 | 0.6066627 | PGLYRP2  |
| cg22194129 | 0.2960059  | -244.3114 | -0.2931924 | 0.5891984 | CLEC4C   |
| cg19949550 | 0.4452306  | -311.3914 | -0.2935925 | 0.7388231 | ASB2     |
| cg10052840 | 0.2014565  | -242.3686 | -0.2936686 | 0.4951251 | SEMA6B   |
| cg27394486 | 0.5062947  | -350.469  | -0.2945266 | 0.8008213 | C15orf2  |
| cg07792737 | 0.5176647  | -350.469  | -0.2946516 | 0.8123163 | NPIP     |
| cg04132607 | 0.5640612  | -350.469  | -0.2950631 | 0.8591244 | GATA5    |
| cg08475088 | 0.5533689  | -350.469  | -0.2951298 | 0.8484987 | NALP9    |
| cg16175725 | 0.5058921  | -350.469  | -0.2953535 | 0.8012456 | TCF1     |
| cg08424423 | 0.5054623  | -350.469  | -0.2954152 | 0.8008775 | CDSN     |
| cg04505023 | 0.4042006  | -288.019  | -0.2955423 | 0.6997429 | SPRR1A   |

|            |           |           |            |           |           |
|------------|-----------|-----------|------------|-----------|-----------|
| cg05215575 | 0.2692997 | -245.8013 | -0.2957442 | 0.5650438 | FLJ25410  |
| cg15996947 | 0.3217795 | -255.0472 | -0.295865  | 0.6176445 | L2HGDH    |
| cg18729973 | 0.4498937 | -322.5797 | -0.2959332 | 0.7458268 | TFF1      |
| cg00563932 | 0.410594  | -294.1314 | -0.2963617 | 0.7069557 | PTGDS     |
| cg19717150 | 0.3708904 | -273.0597 | -0.2964049 | 0.6672953 | HNF4A     |
| cg07651914 | 0.27646   | -248.464  | -0.2967588 | 0.5732188 | CLDN15    |
| cg09736922 | 0.4938422 | -350.469  | -0.2972735 | 0.7911158 | THPO      |
| cg11158374 | 0.4077763 | -294.8553 | -0.2972935 | 0.7050698 | TFF2      |
| cg17741572 | 0.4996379 | -350.469  | -0.2974017 | 0.7970396 | CFB       |
| cg06811800 | 0.3777986 | -278.9435 | -0.297526  | 0.6753246 | ATP4B     |
| cg15780361 | 0.2537917 | -248.1199 | -0.2975991 | 0.5513908 | ALS2CR11  |
| cg14333565 | 0.4937099 | -350.469  | -0.2977567 | 0.7914666 | NRTN      |
| cg15531099 | 0.2361316 | -252.2012 | -0.3001226 | 0.5362542 | LCE1D     |
| cg25710140 | 0.3890763 | -295.0459 | -0.3015749 | 0.6906511 | MID1      |
| cg18790143 | 0.3976119 | -304.7707 | -0.3032942 | 0.7009061 | OTOS      |
| cg12456510 | 0.3761174 | -292.8861 | -0.3034454 | 0.6795629 | TFF2      |
| cg19845843 | 0.4059637 | -312.4424 | -0.3041026 | 0.7100663 | CXorf20   |
| cg09414535 | 0.29913   | -267.9784 | -0.3045683 | 0.6036983 | GRIP1     |
| cg10575735 | 0.2959522 | -267.864  | -0.3048317 | 0.6007839 | SSX4      |
| cg03453449 | 0.3100609 | -271.1938 | -0.3048571 | 0.6149181 | USP44     |
| cg07339138 | 0.2683899 | -263.5974 | -0.3049633 | 0.5733532 | CCDC13    |
| cg17357062 | 0.5206921 | -350.469  | -0.3050629 | 0.8257549 | FCN1      |
| cg02423618 | 0.2862024 | -267.0038 | -0.3053141 | 0.5915165 | SPATA8    |
| cg06436504 | 0.3638363 | -292.7789 | -0.3058044 | 0.6696407 | DOC1      |
| cg08471713 | 0.5292574 | -350.469  | -0.3059983 | 0.8352556 | MEOX1     |
| cg18979223 | 0.3545418 | -289.1455 | -0.3060595 | 0.6606013 | CDKN2B    |
| cg10569414 | 0.3829961 | -304.6054 | -0.3064837 | 0.6894798 | C21orf121 |
| cg05670596 | 0.1807903 | -268.0518 | -0.3070258 | 0.4878161 | CCRL2     |
| cg11719283 | 0.3511111 | -291.1681 | -0.3074857 | 0.6585968 | ZNF574    |
| cg25957124 | 0.219695  | -266.0245 | -0.3075239 | 0.5272189 | DNAH3     |
| cg27442349 | 0.3252627 | -282.461  | -0.3079419 | 0.6332046 | NFKBIB    |

|            |           |           |            |           |                |
|------------|-----------|-----------|------------|-----------|----------------|
| cg24490338 | 0.4117915 | -328.3008 | -0.3081048 | 0.7198963 | TPM3           |
| cg14706739 | 0.3841461 | -310.5495 | -0.3084299 | 0.6925761 | EPB49          |
| cg14238120 | 0.4036578 | -325.0606 | -0.3090419 | 0.7126997 | ELA3A          |
| cg24355048 | 0.3283973 | -286.0563 | -0.3090433 | 0.6374406 | CTSG           |
| cg21065959 | 0.3495831 | -294.7029 | -0.3091974 | 0.6587805 | LCE1E          |
| cg03003745 | 0.2807887 | -274.2547 | -0.3092883 | 0.590077  | UNQ473         |
| cg15503752 | 0.4202399 | -339.2592 | -0.3094893 | 0.7297292 | ST6GALNA<br>C1 |
| cg19917856 | 0.2033027 | -270.4491 | -0.3095531 | 0.5128558 | LOC34289<br>7  |
| cg10409560 | 0.4558077 | -350.469  | -0.3099591 | 0.7657669 | FLJ23657       |
| cg14845091 | 0.3132798 | -286.5508 | -0.3113842 | 0.624664  | ADPRHL1        |
| cg07525077 | 0.2624624 | -275.9565 | -0.3114448 | 0.5739071 | RNASE3         |
| cg26063872 | 0.3308553 | -292.8418 | -0.3115488 | 0.6424041 | DEFB123        |
| cg13204181 | 0.3189655 | -290.2223 | -0.3122009 | 0.6311664 | GH1            |
| cg01643624 | 0.4143671 | -342.9843 | -0.3122579 | 0.726625  | C11orf16       |
| cg21970438 | 0.445022  | -350.469  | -0.3126196 | 0.7576416 | TTLL2          |
| cg08314660 | 0.534674  | -350.469  | -0.3130814 | 0.8477555 | PKP3           |
| cg10127415 | 0.213104  | -276.7932 | -0.3131455 | 0.5262495 | MAGEB6         |
| cg03609102 | 0.2580696 | -278.9435 | -0.3131622 | 0.5712318 | MUC5B          |
| cg04711324 | 0.2517158 | -278.721  | -0.3133756 | 0.5650914 | RIT2           |
| cg24607398 | 0.2081466 | -277.9554 | -0.3136727 | 0.5218193 | MLH1           |
| cg06277657 | 0.1652984 | -283.4637 | -0.3142655 | 0.4795639 | DGKI           |
| cg25762706 | 0.254845  | -281.0798 | -0.3143768 | 0.5692218 | STMN4          |
| cg06832950 | 0.4612308 | -350.469  | -0.3147818 | 0.7760125 | SPG3A          |
| cg16462075 | 0.4091163 | -349.3696 | -0.3157056 | 0.7248219 | MUC3B          |
| cg12619162 | 0.4528832 | -350.469  | -0.3157181 | 0.7686013 | FXYP4          |
| cg13578652 | 0.3176605 | -302.2734 | -0.3174691 | 0.6351296 | UBASH3A        |
| cg01015871 | 0.2992542 | -296.4294 | -0.3174876 | 0.6167418 | MT4            |
| cg06220755 | 0.3001764 | -297.7243 | -0.3179397 | 0.618116  | RAI2           |
| cg22510822 | 0.3262143 | -306.7373 | -0.3180015 | 0.6442158 | OR1E2          |
| cg07126559 | 0.440896  | -350.469  | -0.3184139 | 0.7593099 | SGCG           |

|            |           |           |            |           |           |
|------------|-----------|-----------|------------|-----------|-----------|
| cg19111262 | 0.2050167 | -288.2508 | -0.3189644 | 0.5239811 | IGSF9     |
| cg07441143 | 0.3703793 | -332.1194 | -0.3192561 | 0.6896355 | SLURP1    |
| cg10062065 | 0.3389533 | -315.6476 | -0.3193978 | 0.6583511 | APEG1     |
| cg05348870 | 0.4496677 | -350.469  | -0.3197287 | 0.7693964 | TNFSF14   |
| cg13180098 | 0.3215347 | -310.947  | -0.3204444 | 0.641979  | RHO       |
| cg23829949 | 0.260803  | -295.0406 | -0.3206205 | 0.5814235 | ZNF238    |
| cg15626350 | 0.1461109 | -300.2606 | -0.3213511 | 0.467462  | ESR1      |
| cg26149550 | 0.4670851 | -350.469  | -0.3214612 | 0.7885463 | KLK15     |
| cg06639544 | 0.4168135 | -350.469  | -0.3217018 | 0.7385153 | OR7A5     |
| cg12489960 | 0.3468472 | -326.3868 | -0.3220002 | 0.6688474 | SGCB      |
| cg15210427 | 0.1923254 | -295.7992 | -0.322507  | 0.5148324 | CST9L     |
| cg16175263 | 0.2399207 | -297.5203 | -0.323009  | 0.5629296 | TNFRSF10C |
| cg10805676 | 0.3902137 | -350.469  | -0.3231114 | 0.7133251 | MRPL28    |
| cg19807685 | 0.3516929 | -334.1742 | -0.3239182 | 0.6756111 | HSD17B2   |
| cg10758292 | 0.4455347 | -350.469  | -0.324324  | 0.7698587 | DEFA1     |
| cg19954000 | 0.1758692 | -304.3867 | -0.3261172 | 0.5019863 | FGF1      |
| cg20154346 | 0.3112076 | -322.7963 | -0.3267784 | 0.6379861 | RAI2      |
| cg10275770 | 0.1117552 | -322.7963 | -0.3282997 | 0.4400549 | ICAM2     |
| cg01774645 | 0.3540353 | -348.3812 | -0.3284787 | 0.682514  | ARHGAP30  |
| cg14894144 | 0.1509117 | -312.7948 | -0.3285423 | 0.479454  | LAMA3     |
| cg19042947 | 0.308572  | -330.2887 | -0.3301314 | 0.6387034 | SERPINA4  |
| cg00756887 | 0.3535585 | -350.469  | -0.3319025 | 0.685461  | PVRL4     |
| cg10883352 | 0.340476  | -350.469  | -0.3321272 | 0.6726032 |           |
| cg19728223 | 0.204212  | -319.3528 | -0.3341666 | 0.5383787 | KCNQ1     |
| cg16626670 | 0.3115368 | -343.3619 | -0.3346694 | 0.6462061 | CLEC4G    |
| cg15983538 | 0.4106378 | -350.469  | -0.3351912 | 0.745829  | SEMA4A    |
| cg21372914 | 0.3787588 | -350.469  | -0.3352694 | 0.7140282 | CLEC4M    |
| cg22264436 | 0.4114063 | -350.469  | -0.3354865 | 0.7468928 | SOST      |
| cg16122592 | 0.3045078 | -343.9991 | -0.336047  | 0.6405548 | MAGEB6    |
| cg07967308 | 0.2929082 | -340.8091 | -0.3365345 | 0.6294427 | ACP5      |
| cg054440   | 0.5148799 | -350.469  | -0.336969  | 0.8518489 | FUT6      |

|            |           |           |            |           |         |
|------------|-----------|-----------|------------|-----------|---------|
| 24         |           |           |            |           |         |
| cg09027725 | 0.2922337 | -342.0867 | -0.3371354 | 0.6293691 | COX4I2  |
| cg08403419 | 0.3097456 | -349.7599 | -0.3373724 | 0.647118  | RLN3R2  |
| cg00698688 | 0.4666557 | -350.469  | -0.3374117 | 0.8040674 | SULT2B1 |
| cg03534410 | 0.5241687 | -350.469  | -0.3374942 | 0.8616629 | TMEM40  |
| cg03364781 | 0.3435501 | -350.469  | -0.3376121 | 0.6811622 | ALPK1   |
| cg13521229 | 0.2154481 | -327.3213 | -0.3376715 | 0.5531197 | JOSD2   |
| cg02130905 | 0.2690745 | -336.2427 | -0.3377168 | 0.6067913 | STMN4   |
| cg16772207 | 0.2808773 | -343.8202 | -0.3393547 | 0.620232  | MYT1    |
| cg05822532 | 0.2010833 | -330.6027 | -0.3394399 | 0.5405232 | ELN     |
| cg12970084 | 0.338295  | -350.469  | -0.339561  | 0.677856  | ELF3    |
| cg15928132 | 0.2675095 | -341.572  | -0.3400575 | 0.607567  | CCKAR   |
| cg23412777 | 0.3017922 | -350.469  | -0.3407299 | 0.6425221 | PYGO1   |
| cg24735489 | 0.2835258 | -348.8251 | -0.3409599 | 0.6244857 | CDSN    |
| cg20544605 | 0.3165931 | -350.469  | -0.3411081 | 0.6577012 | SORBS2  |
| cg07997737 | 0.2310349 | -336.9835 | -0.3412576 | 0.5722926 | NRTN    |
| cg08970446 | 0.4802257 | -350.469  | -0.3423631 | 0.8225887 | SLC1A7  |
| cg24670715 | 0.156878  | -340.3347 | -0.3427651 | 0.4996431 | ANGPT2  |
| cg21686987 | 0.4327648 | -350.469  | -0.3437133 | 0.7764781 | CTRB1   |
| cg01515887 | 0.3849731 | -350.469  | -0.3437708 | 0.7287439 | SAA2    |
| cg05766474 | 0.4744237 | -350.469  | -0.3440583 | 0.818482  | CCL16   |
| cg14696820 | 0.256804  | -348.8419 | -0.3441452 | 0.6009493 | LCE1A   |
| cg14179628 | 0.2939194 | -350.469  | -0.3450334 | 0.6389529 | TCEAL7  |
| cg20373326 | 0.334526  | -350.469  | -0.3464736 | 0.6809996 | HSD17B2 |
| cg07824742 | 0.4125586 | -350.469  | -0.3465125 | 0.7590712 | DBH     |
| cg06101324 | 0.1475841 | -350.469  | -0.3478395 | 0.4954236 | SPRR1A  |
| cg25214346 | 0.3060293 | -350.469  | -0.3481367 | 0.654166  | NR1I3   |
| cg15516226 | 0.4489615 | -350.469  | -0.3491774 | 0.7981389 | BTNL9   |
| cg24024214 | 0.4715764 | -350.469  | -0.349973  | 0.8215494 | BTNL8   |
| cg08450982 | 0.2382757 | -350.469  | -0.3504617 | 0.5887374 | NUMBL   |
| cg16986846 | 0.2415437 | -350.469  | -0.350928  | 0.5924717 | SCGB2A1 |

|            |            |          |            |           |           |
|------------|------------|----------|------------|-----------|-----------|
| cg26292028 | 0.3369199  | -350.469 | -0.3530673 | 0.6899872 | FLJ37587  |
| cg16990174 | 0.1941861  | -350.469 | -0.353302  | 0.547488  | RYBP      |
| cg03221619 | 0.1977061  | -350.469 | -0.3555856 | 0.5532917 | FCER2     |
| cg25221254 | 0.3693327  | -350.469 | -0.3571114 | 0.7264441 | ASAH3     |
| cg14182690 | 0.4327426  | -350.469 | -0.3581538 | 0.7908964 | RUNX3     |
| cg05485062 | 0.4176066  | -350.469 | -0.3592479 | 0.7768545 | SERPINA12 |
| cg24750391 | 0.1296686  | -350.469 | -0.3593676 | 0.4890362 | PON3      |
| cg03602500 | 0.370848   | -350.469 | -0.3598494 | 0.7306974 | FLJ00060  |
| cg12815142 | 0.3144491  | -350.469 | -0.3616767 | 0.6761258 | SPAG7     |
| cg21948655 | 0.4369155  | -350.469 | -0.3619581 | 0.7988736 | SMCP      |
| cg15652212 | 0.3310183  | -350.469 | -0.3623571 | 0.6933754 | FLJ90586  |
| cg20334738 | 0.2836401  | -350.469 | -0.3652416 | 0.6488818 | MAB21L2   |
| cg08684473 | 0.3831029  | -350.469 | -0.3652804 | 0.7483833 | LILRB5    |
| cg24694549 | 0.2743033  | -350.469 | -0.3659974 | 0.6403007 | GRIP1     |
| cg10990993 | 0.2324561  | -350.469 | -0.3660769 | 0.5985331 | MLH1      |
| cg12513481 | 0.1929905  | -350.469 | -0.367272  | 0.5602626 | SCAP1     |
| cg14992108 | 0.3510814  | -350.469 | -0.3691767 | 0.7202581 | SNTB1     |
| cg01103730 | 0.3278863  | -350.469 | -0.369484  | 0.6973703 | IL20      |
| cg26672426 | 0.2563614  | -350.469 | -0.3698636 | 0.626225  | PTGES     |
| cg01335367 | 0.1497868  | -350.469 | -0.3735641 | 0.5233509 | C12orf34  |
| cg23815000 | 0.3526621  | -350.469 | -0.3745332 | 0.7271953 | LCN1      |
| cg08573687 | 0.3061677  | -350.469 | -0.3745495 | 0.6807172 | TH        |
| cg06123346 | 0.2424465  | -350.469 | -0.3775486 | 0.6199951 | ATP4A     |
| cg06501790 | 0.2863328  | -350.469 | -0.3817138 | 0.6680466 | SLC34A1   |
| cg18780284 | 0.2982884  | -350.469 | -0.3831052 | 0.6813936 | SPRR1B    |
| cg25119415 | 0.3001483  | -350.469 | -0.3877927 | 0.687941  | MNDA      |
| cg27619475 | 0.1684046  | -350.469 | -0.3880815 | 0.5564861 | SLC16A5   |
| cg17907567 | 0.2335434  | -350.469 | -0.3882501 | 0.6217936 | HAMP      |
| cg21457804 | 0.3606782  | -350.469 | -0.3898364 | 0.7505146 | CT45-2    |
| cg18149207 | 0.3345924  | -350.469 | -0.3987587 | 0.7333511 | RORC      |
| cg142047   | 0.06397704 | -350.469 | -0.4021686 | 0.4661456 | CYB561    |

|            |            |          |            |           |       |
|------------|------------|----------|------------|-----------|-------|
| 35         |            |          |            |           |       |
| cg06536578 | 0.2420131  | -350.469 | -0.4081324 | 0.6501456 | JPH4  |
| cg22374142 | 0.08937864 | -350.469 | -0.4082978 | 0.4976765 | HSF4  |
| cg25856811 | 0.3027658  | -350.469 | -0.4151909 | 0.7179568 | SPRR3 |
| cg04144768 | 0.2637959  | -350.469 | -0.415307  | 0.6791029 | DDC   |
| cg26927807 | 0.2687147  | -350.469 | -0.4249378 | 0.6936526 | BTBD2 |
| cg13726507 | 0.4021371  | -350.469 | -0.4262811 | 0.8284182 | CTAG2 |
| cg14256699 | 0.4281882  | -350.469 | -0.4322005 | 0.8603887 | SOST  |
| cg26164184 | 0.3667875  | -350.469 | -0.4481277 | 0.8149152 | FCN2  |
| cg13021192 | 0.09652124 | -350.469 | -0.5039948 | 0.6005161 | CTSZ  |
| cg16179125 | 0.1331095  | -350.469 | -0.5100906 | 0.6432001 | CTSZ  |

**Suppelementary table 13. Probes differentially methylated between *RET*-mutated tumours and normal tissue**

| TargetID   | RET.AVG_Beta | RET.DiffScore | RET.Delta Beta | normal.AVG_Beta | SYMBOL   |
|------------|--------------|---------------|----------------|-----------------|----------|
| cg16363586 | 0.6141389    | 339.4807      | 0.3025294      | 0.3116095       | BST2     |
| cg06204948 | 0.5180554    | 339.4807      | 0.2917404      | 0.226315        | MARK2    |
| cg14409083 | 0.5276059    | 339.4807      | 0.2890297      | 0.2385762       | EMP1     |
| cg01126560 | 0.6742277    | 339.4807      | 0.2764263      | 0.3978014       | C9orf142 |
| cg03852144 | 0.5250785    | 339.4807      | 0.2588267      | 0.2662518       | GLRX     |
| cg01346152 | 0.5000116    | 339.4807      | 0.2490346      | 0.2509769       | DHRS3    |
| cg26394940 | 0.364035     | 339.4807      | 0.245714       | 0.118321        | FLJ10945 |
| cg16517394 | 0.4461616    | 339.4807      | 0.2414309      | 0.2047307       | TNFSF4   |
| cg09871315 | 0.5443512    | 126.9372      | 0.2389772      | 0.305374        | HOXA2    |
| cg24101578 | 0.5739437    | 118.2729      | 0.2342299      | 0.3397138       | CDH22    |
| cg10861599 | 0.5106688    | 119.1197      | 0.2286621      | 0.2820067       | TNFSF4   |
| cg08624249 | 0.7055397    | 112.1707      | 0.2265095      | 0.4790302       | KIAA0889 |
| cg17998964 | 0.3882163    | 339.4807      | 0.224425       | 0.1637913       | MARK2    |
| cg03605761 | 0.5792937    | 104.8027      | 0.2221926      | 0.357101        | RNF126   |
| cg22628873 | 0.6713313    | 101.805       | 0.2185028      | 0.4528286       | GGT6     |
| cg25101936 | 0.7188479    | 105.7451      | 0.2182697      | 0.5005782       | ZBTB16   |
| cg07251788 | 0.7014782    | 100.0918      | 0.214135       | 0.4873433       | CLTCL1   |
| cg22467567 | 0.4923321    | 104.6278      | 0.2139002      | 0.2784319       | IGFBP5   |
| cg06507244 | 0.6597449    | 96.0965       | 0.2132643      | 0.4464805       | DHX32    |
| cg06627364 | 0.3906854    | 121.2099      | 0.2076089      | 0.1830765       | MGC4677  |
| cg16616769 | 0.741579     | 93.63908      | 0.2015827      | 0.5399963       | MGC35048 |
| cg12564453 | 0.7337025    | 91.16164      | 0.2000533      | 0.5336493       | CETP     |
| cg01103836 | 0.874963     | 130.6221      | 0.2000048      | 0.6749582       | MYO9B    |
| cg23580945 | 0.5497846    | -105.9985     | -0.2000843     | 0.7498689       | FLJ43826 |
| cg03364781 | 0.4810647    | -91.97941     | -0.2000975     | 0.6811622       | ALPK1    |

|            |           |           |            |           |           |
|------------|-----------|-----------|------------|-----------|-----------|
| cg18538812 | 0.2416636 | -88.80154 | -0.2001664 | 0.44183   | GIF       |
| cg07471052 | 0.7057543 | -201.2404 | -0.2001731 | 0.9059274 | CDK3      |
| cg24919884 | 0.4577272 | -89.05791 | -0.2002409 | 0.657968  | ARHGEF16  |
| cg19717326 | 0.246828  | -88.54828 | -0.2005255 | 0.4473534 | MYADM     |
| cg25400358 | 0.3620302 | -83.68384 | -0.2007748 | 0.5628049 | GPR137    |
| cg23278885 | 0.5042692 | -96.64542 | -0.2008188 | 0.7050881 | TGM6      |
| cg18063149 | 0.4892721 | -94.21997 | -0.2009886 | 0.6902608 | FMO3      |
| cg07664027 | 0.5795134 | -116.8238 | -0.2010418 | 0.7805552 | RPL13A    |
| cg01663968 | 0.1423713 | -108.4788 | -0.2011463 | 0.3435176 | CTSZ      |
| cg21489722 | 0.5607121 | -110.5895 | -0.2011536 | 0.7618657 | FAM9B     |
| cg26473272 | 0.666001  | -165.1459 | -0.2013879 | 0.867389  | SYT8      |
| cg07792737 | 0.6109162 | -130.2685 | -0.2014001 | 0.8123163 | NPIP      |
| cg10052840 | 0.2936386 | -85.70172 | -0.2014864 | 0.4951251 | SEMA6B    |
| cg27418851 | 0.4576738 | -90.37128 | -0.2015366 | 0.6592104 | MBL2      |
| cg15590780 | 0.2954544 | -85.92134 | -0.2018858 | 0.4973402 | USH2A     |
| cg00689010 | 0.4524277 | -90.15679 | -0.201895  | 0.6543227 | NCSTN     |
| cg25072962 | 0.423374  | -87.48565 | -0.2019602 | 0.6253342 | MGC35295  |
| cg26583078 | 0.4591237 | -91.0274  | -0.2019804 | 0.6611041 | SORBS2    |
| cg18242139 | 0.5114066 | -99.49696 | -0.2020041 | 0.7134107 | ELAVL4    |
| cg04337944 | 0.2766576 | -87.19349 | -0.2020414 | 0.4786991 | FBLN1     |
| cg08684473 | 0.5462096 | -107.7361 | -0.2021737 | 0.7483833 | LILRB5    |
| cg13447818 | 0.5676587 | -114.4472 | -0.2022987 | 0.7699574 | FLG       |
| cg12949760 | 0.4922299 | -96.17561 | -0.202301  | 0.694531  | KCNQ1     |
| cg01568736 | 0.5373582 | -105.629  | -0.2023147 | 0.7396729 | SERPINB7  |
| cg02130905 | 0.4043903 | -86.6141  | -0.202401  | 0.6067913 | STMN4     |
| cg06244906 | 0.5652246 | -113.9072 | -0.2024825 | 0.7677072 | ZIM2      |
| cg16462075 | 0.5223384 | -102.3908 | -0.2024835 | 0.7248219 | MUC3B     |
| cg08495878 | 0.6619939 | -164.5056 | -0.2025579 | 0.8645517 | SERPINA4  |
| cg05985767 | 0.4669501 | -92.83908 | -0.2027707 | 0.6697208 | ANPEP     |
| cg25827666 | 0.533052  | -105.2268 | -0.2028347 | 0.7358867 | NTRK1     |
| cg06437862 | 0.5570782 | -112.0406 | -0.2030523 | 0.7601305 | TUBA2     |
| cg09715672 | 0.2635104 | -89.12792 | -0.2030889 | 0.4665993 | C10orf116 |
| cg06531741 | 0.3324736 | -85.97534 | -0.2033509 | 0.5358245 | HTR3B     |
| cg18979223 | 0.457029  | -92.41476 | -0.2035723 | 0.6606013 | CDKN2B    |
| cg18056600 | 0.1613224 | -105.7451 | -0.2036178 | 0.3649402 | ZMYND15   |
| cg11762346 | 0.4991357 | -99.03928 | -0.2036844 | 0.7028201 | HKDC1     |
| cg06275635 | 0.3549532 | -86.38834 | -0.2038894 | 0.5588427 | PGLYRP3   |
| cg19824441 | 0.4265645 | -89.78389 | -0.2040459 | 0.6306103 | ADMR      |
| cg15869022 | 0.3553292 | -86.60481 | -0.204138  | 0.5594673 | GPR17     |
| cg04488758 | 0.457402  | -93.0736  | -0.2041658 | 0.6615677 | USP44     |
| cg07525077 | 0.3697257 | -86.87199 | -0.2041815 | 0.5739071 | RNASE3    |
| cg19447966 | 0.5481178 | -111.0378 | -0.2042878 | 0.7524056 | TEAD1     |
| cg08158289 | 0.1715601 | -104.125  | -0.2042897 | 0.3758498 | KIAA0141  |
| cg04574507 | 0.4445444 | -91.82198 | -0.204382  | 0.6489264 | CD1B      |
| cg00152644 | 0.6168387 | -138.4765 | -0.2043875 | 0.8212262 | SPRR2E    |



|            |           |           |            |           |           |
|------------|-----------|-----------|------------|-----------|-----------|
| cg07484827 | 0.2962995 | -88.10714 | -0.2044543 | 0.5007538 | CHRNA10   |
| cg14911395 | 0.2664446 | -90.10414 | -0.2044643 | 0.4709089 | SEMA3B    |
| cg18988110 | 0.2558024 | -91.13265 | -0.2045401 | 0.4603425 | ATAD4     |
| cg20311730 | 0.423498  | -90.04996 | -0.2045763 | 0.6280743 | NALP10    |
| cg04567009 | 0.3872435 | -88.10714 | -0.2048647 | 0.5921081 | FCGR3B    |
| cg08555657 | 0.5400344 | -109.6176 | -0.2048815 | 0.7449159 | SPRR2E    |
| cg24607398 | 0.3169318 | -87.64392 | -0.2048875 | 0.5218193 | MLH1      |
| cg09343150 | 0.5697731 | -119.2797 | -0.2051831 | 0.7749562 | MEN1      |
| cg27020690 | 0.1478989 | -110.7998 | -0.205295  | 0.3531938 | TERC      |
| cg19000186 | 0.4633534 | -95.06622 | -0.2053126 | 0.668666  | CNGA1     |
| cg02813121 | 0.6211852 | -142.5424 | -0.2053381 | 0.8265232 | S100A12   |
| cg10677144 | 0.505901  | -102.3446 | -0.2053467 | 0.7112477 | MYOM1     |
| cg27394486 | 0.5954238 | -129.7641 | -0.2053975 | 0.8008213 | C15orf2   |
| cg07123548 | 0.6116178 | -137.6178 | -0.2054454 | 0.8170632 | HIPK4     |
| cg10127415 | 0.3207231 | -88.1302  | -0.2055264 | 0.5262495 | MAGEB6    |
| cg13439299 | 0.6191036 | -142.0158 | -0.2056478 | 0.8247514 | DNAJC5G   |
| cg01227741 | 0.5342569 | -109.37   | -0.2058856 | 0.7401425 | GIMAP7    |
| cg06325687 | 0.6964693 | -206.3535 | -0.2060013 | 0.9024706 | OPN1MW    |
| cg24660086 | 0.4630298 | -95.81652 | -0.2060328 | 0.6690627 | RGR       |
| cg10071275 | 0.3744169 | -88.80154 | -0.2061237 | 0.5805405 | MYT1      |
| cg08244028 | 0.4468985 | -93.93452 | -0.2061577 | 0.6530562 | MSH3      |
| cg15842430 | 0.421692  | -91.46799 | -0.2061661 | 0.627858  | FAM12B    |
| cg20903926 | 0.5451965 | -112.7819 | -0.2062033 | 0.7513998 | C1orf177  |
| cg07643942 | 0.3558691 | -88.54828 | -0.206256  | 0.5621251 | LACRT     |
| cg18780284 | 0.4749406 | -98.00538 | -0.206453  | 0.6813936 | SPRR1B    |
| cg02423618 | 0.3850442 | -89.51582 | -0.2064723 | 0.5915165 | SPATA8    |
| cg12619162 | 0.5621089 | -118.5573 | -0.2064924 | 0.7686013 | FXVD4     |
| cg16742703 | 0.4239115 | -92.02892 | -0.2065478 | 0.6304594 | KLK3      |
| cg21065959 | 0.4522318 | -94.96701 | -0.2065486 | 0.6587805 | LCE1E     |
| cg14186992 | 0.4517737 | -95.02003 | -0.2066544 | 0.6584281 | HKR3      |
| cg10321723 | 0.6625345 | -174.0647 | -0.2066876 | 0.8692221 | PDZK1     |
| cg24490338 | 0.5131286 | -105.4175 | -0.2067677 | 0.7198963 | TPM3      |
| cg04048249 | 0.4508872 | -95.19501 | -0.2069212 | 0.6578084 | APOC3     |
| cg01367992 | 0.3825469 | -89.99275 | -0.2070789 | 0.5896258 | LY9       |
| cg18533225 | 0.4821472 | -100.0005 | -0.2071086 | 0.6892558 | KLHDC7B   |
| cg04273431 | 0.1818621 | -104.5292 | -0.2072062 | 0.3890684 | PRR3      |
| cg17240454 | 0.5923019 | -131.905  | -0.2076595 | 0.7999614 | SPDEF     |
| cg25762706 | 0.3612584 | -90.19344 | -0.2079634 | 0.5692218 | STMN4     |
| cg13859324 | 0.2923816 | -91.50857 | -0.2080734 | 0.500455  | UNC45B    |
| cg03782453 | 0.176195  | -106.5144 | -0.2081879 | 0.3843829 | FLJ90575  |
| cg04727522 | 0.4571961 | -97.42852 | -0.2082433 | 0.6654394 | C18orf22  |
| cg03752885 | 0.3168474 | -90.71026 | -0.2083007 | 0.5251481 | DAPK3     |
| cg21808053 | 0.3171731 | -90.83755 | -0.2084454 | 0.5256186 | DIRAS3    |
| cg16242770 | 0.5534247 | -118.9566 | -0.2087961 | 0.7622209 | KRTAP17-1 |
| cg09414535 | 0.3948025 | -92.31754 | -0.2088957 | 0.6036983 | GRIP1     |

|            |           |           |            |           |           |
|------------|-----------|-----------|------------|-----------|-----------|
| cg22937320 | 0.4985354 | -105.057  | -0.2089927 | 0.7075281 | C9orf138  |
| cg07115820 | 0.3679951 | -91.34138 | -0.2090105 | 0.5770056 | EPX       |
| cg09299388 | 0.4880766 | -103.2257 | -0.2090108 | 0.6970874 | PGK2      |
| cg06066303 | 0.5977945 | -137.0334 | -0.2091026 | 0.8068971 | MS4A5     |
| cg09027725 | 0.4202377 | -94.33099 | -0.2091314 | 0.6293691 | COX4I2    |
| cg09931793 | 0.4820139 | -102.3482 | -0.2091851 | 0.6911989 | OR2K2     |
| cg04655481 | 0.4926478 | -104.4146 | -0.2093454 | 0.7019932 | GPR21     |
| cg24693053 | 0.261044  | -94.94707 | -0.2093588 | 0.4704029 | MFSD7     |
| cg22253945 | 0.5743541 | -127.5209 | -0.2094603 | 0.7838143 | GPR45     |
| cg06303238 | 0.442548  | -97.18629 | -0.2096855 | 0.6522335 | SALL4     |
| cg13259290 | 0.5159144 | -109.7468 | -0.2097695 | 0.7256839 | CSF2      |
| cg04132607 | 0.6492401 | -170.5615 | -0.2098842 | 0.8591244 | GATA5     |
| cg03931808 | 0.6770014 | -195.7476 | -0.2100338 | 0.8870353 | RLN3      |
| cg24352688 | 0.4077036 | -94.28899 | -0.2100605 | 0.6177641 | OFD1      |
| cg20416179 | 0.580469  | -130.8422 | -0.2101561 | 0.7906252 | C6orf71   |
| cg24429836 | 0.249203  | -97.31154 | -0.210659  | 0.459862  | LDHD      |
| cg23829949 | 0.3707085 | -93.04058 | -0.2107151 | 0.5814235 | ZNF238    |
| cg04450876 | 0.5737673 | -129.2964 | -0.2108253 | 0.7845926 | FAM112B   |
| cg00226923 | 0.552474  | -121.8546 | -0.2110401 | 0.7635141 | FGD2      |
| cg11739626 | 0.4893183 | -105.6766 | -0.2110421 | 0.7003604 | AKT1S1    |
| cg27117399 | 0.3835252 | -94.06508 | -0.2112547 | 0.5947799 | CNDP1     |
| cg10746737 | 0.4938364 | -106.8577 | -0.2113465 | 0.7051829 | HLA-DRB5  |
| cg18089000 | 0.4875986 | -105.7451 | -0.2113828 | 0.6989814 | GBGT1     |
| cg24355048 | 0.4259863 | -97.29191 | -0.2114542 | 0.6374406 | CTSG      |
| cg08815403 | 0.3631919 | -93.58691 | -0.2114922 | 0.5746841 | HSD17B13  |
| cg13271951 | 0.313558  | -93.93452 | -0.2116865 | 0.5252445 | FAM57B    |
| cg01869233 | 0.2010719 | -104.9931 | -0.2117176 | 0.4127895 | C20orf75  |
| cg19859270 | 0.4711509 | -103.5207 | -0.2117947 | 0.6829456 | GPR15     |
| cg05564657 | 0.6683458 | -191.8242 | -0.2118482 | 0.880194  | AADAC     |
| cg10853416 | 0.4947785 | -107.6789 | -0.2118525 | 0.7066309 | MS4A7     |
| cg18396533 | 0.2068432 | -104.4146 | -0.2120899 | 0.4189331 | DYDC1     |
| cg12069042 | 0.4667999 | -103.2881 | -0.2121857 | 0.6789856 | PLXNB1    |
| cg01726767 | 0.4062356 | -96.45499 | -0.2122865 | 0.6185221 | LALBA     |
| cg02989940 | 0.3620366 | -94.36263 | -0.2123416 | 0.5743782 | ERAF      |
| cg20104776 | 0.3538597 | -94.51772 | -0.212656  | 0.5665156 | LDOC1     |
| cg18239253 | 0.3462056 | -94.70631 | -0.2129264 | 0.559132  | DEFB32    |
| cg08314660 | 0.6346279 | -166.4672 | -0.2131276 | 0.8477555 | PKP3      |
| cg10322876 | 0.4102709 | -97.70769 | -0.2132102 | 0.6234811 | CYP2B6    |
| cg00718513 | 0.2719921 | -97.66402 | -0.2133126 | 0.4853047 |           |
| cg23382741 | 0.4557819 | -103.0597 | -0.2134281 | 0.6692101 | PPP1R14D  |
| cg26884581 | 0.183208  | -110.6714 | -0.2141746 | 0.3973826 | PYGM      |
| cg14127336 | 0.6558729 | -185.94   | -0.2141938 | 0.8700668 | TCL1A     |
| cg21624282 | 0.5838842 | -139.2989 | -0.2143524 | 0.7982366 | LOC122258 |
| cg09546307 | 0.4599354 | -104.7249 | -0.2144611 | 0.6743965 | CLEC4D    |
| cg01678091 | 0.5364901 | -122.1554 | -0.2148352 | 0.7513254 | MAGEL2    |

|            |           |           |            |           |           |
|------------|-----------|-----------|------------|-----------|-----------|
| cg20781967 | 0.2214122 | -104.7893 | -0.2149894 | 0.4364015 | NINJ2     |
| cg01053621 | 0.3529452 | -96.83838 | -0.2150365 | 0.5679817 | APOA2     |
| cg20856834 | 0.4175011 | -100.5474 | -0.2152185 | 0.6327196 | OR12D3    |
| cg19006008 | 0.4219073 | -101.0481 | -0.2152855 | 0.6371928 | F2RL3     |
| cg03044435 | 0.5498787 | -127.629  | -0.2155575 | 0.7654362 | FLJ35816  |
| cg12351042 | 0.4324412 | -102.4639 | -0.215601  | 0.6480422 | OR2B2     |
| cg02601403 | 0.5533972 | -129.4429 | -0.2159808 | 0.7693781 | TBC1D3C   |
| cg04806409 | 0.5176749 | -119.0278 | -0.2165038 | 0.7341787 | TFF3      |
| cg00698688 | 0.5872909 | -145.0024 | -0.2167765 | 0.8040674 | SULT2B1   |
| cg21639401 | 0.4470793 | -105.5439 | -0.2168614 | 0.6639407 | FLJ31222  |
| cg12593411 | 0.4120773 | -101.8533 | -0.2169017 | 0.6289791 | ANGPTL6   |
| cg08341924 | 0.5414116 | -126.7753 | -0.2169147 | 0.7583263 | TGM1      |
| cg10210238 | 0.2376852 | -104.4592 | -0.2169234 | 0.4546087 | CDKN2B    |
| cg07947016 | 0.2649397 | -101.7714 | -0.2169529 | 0.4818926 | KLK2      |
| cg18129786 | 0.5928427 | -148.3588 | -0.2170244 | 0.8098671 | ZNF445    |
| cg00644033 | 0.7005286 | -244.9592 | -0.2170378 | 0.9175664 | MUC3B     |
| cg14894144 | 0.2623193 | -102.1422 | -0.2171347 | 0.479454  | LAMA3     |
| cg15210427 | 0.2976436 | -99.82443 | -0.2171888 | 0.5148324 | CST9L     |
| cg22190114 | 0.4980483 | -115.2747 | -0.2173331 | 0.7153814 | NALP8     |
| cg24851490 | 0.2862798 | -101.179  | -0.217967  | 0.5042468 | RNASE2    |
| cg10575735 | 0.3827475 | -100.9784 | -0.2180364 | 0.6007839 | SSX4      |
| cg24619694 | 0.447648  | -107.0537 | -0.2181878 | 0.6658359 | TAGLN     |
| cg15518950 | 0.2540873 | -103.9482 | -0.2182274 | 0.4723147 | PRP2      |
| cg02218324 | 0.4316766 | -105.2268 | -0.2183048 | 0.6499814 | RSHL1     |
| cg01772980 | 0.405505  | -102.9425 | -0.2184658 | 0.6239709 | SCGB1D1   |
| cg03609102 | 0.3527656 | -100.3049 | -0.2184663 | 0.5712318 | MUC5B     |
| cg11158374 | 0.4864124 | -114.4175 | -0.2186574 | 0.7050698 | TFF2      |
| cg04962134 | 0.3813272 | -101.6122 | -0.2187138 | 0.600041  | TRIM51    |
| cg16899306 | 0.4029246 | -103.0943 | -0.2188101 | 0.6217347 | HLA-DQB2  |
| cg15075718 | 0.4114881 | -103.9482 | -0.2189346 | 0.6304227 | MFRP      |
| cg19910382 | 0.3766419 | -101.6314 | -0.2189669 | 0.5956088 | FABP1     |
| cg16222568 | 0.4907345 | -115.7732 | -0.2189865 | 0.709721  | APEG1     |
| cg06811800 | 0.4563305 | -109.3234 | -0.2189941 | 0.6753246 | ATP4B     |
| cg18971671 | 0.4751367 | -112.5795 | -0.2190324 | 0.6941691 | TULP2     |
| cg27090216 | 0.1387395 | -127.5213 | -0.2193509 | 0.3580904 | TNFRSF10C |
| cg01074640 | 0.4275968 | -105.8834 | -0.2193903 | 0.6469871 | IFNA17    |
| cg23881725 | 0.2100529 | -110.8664 | -0.2196309 | 0.4296838 | DLEC1     |
| cg24824840 | 0.5703396 | -142.2863 | -0.2197694 | 0.790109  | SHANK1    |
| cg02324920 | 0.3052629 | -102.1352 | -0.219911  | 0.5251739 | NEURL     |
| cg24750391 | 0.268831  | -104.4384 | -0.2202052 | 0.4890362 | PON3      |
| cg00626119 | 0.3165711 | -102.1118 | -0.2202154 | 0.5367865 | NTRK1     |
| cg21432842 | 0.3177736 | -102.3543 | -0.2205137 | 0.5382873 | CSF3      |
| cg05248781 | 0.6203389 | -172.7047 | -0.2209423 | 0.8412812 | LCE5A     |
| cg02844051 | 0.5150685 | -124.7876 | -0.2211661 | 0.7362346 | ZD52F10   |
| cg08093398 | 0.4306025 | -108.4788 | -0.2213659 | 0.6519684 | PSF1      |

|            |           |           |            |           |           |
|------------|-----------|-----------|------------|-----------|-----------|
| cg27442349 | 0.411771  | -106.468  | -0.2214336 | 0.6332046 | NFKBIB    |
| cg15060813 | 0.2879737 | -104.3831 | -0.2214536 | 0.5094273 | LRFN3     |
| cg22194129 | 0.3675266 | -103.9482 | -0.2216718 | 0.5891984 | CLEC4C    |
| cg13694749 | 0.4627754 | -113.7373 | -0.2217819 | 0.6845574 | SCN4A     |
| cg19712821 | 0.3450021 | -103.5207 | -0.2217964 | 0.5667985 | KSP37     |
| cg14662756 | 0.4219618 | -109.0515 | -0.222776  | 0.6447378 | NPFF      |
| cg04457051 | 0.3820712 | -105.7451 | -0.2228415 | 0.6049128 | SCOC      |
| cg01837574 | 0.312162  | -104.806  | -0.222995  | 0.535157  | TRAPPC1   |
| cg08603768 | 0.4328246 | -110.8664 | -0.2232571 | 0.6560817 | WNT8A     |
| cg10990993 | 0.3747467 | -106.3076 | -0.2237864 | 0.5985331 | MLH1      |
| cg12943082 | 0.520501  | -130.0436 | -0.2238636 | 0.7443646 | CCL26     |
| cg25994725 | 0.3381523 | -105.4156 | -0.2238742 | 0.5620265 | C6orf81   |
| cg10569414 | 0.4655543 | -116.9046 | -0.2239256 | 0.6894798 | C21orf121 |
| cg17264470 | 0.6302181 | -187.2439 | -0.2241341 | 0.8543522 | FGF21     |
| cg24694549 | 0.4157196 | -110.3805 | -0.2245811 | 0.6403007 | GRIP1     |
| cg10213812 | 0.6384286 | -195.2163 | -0.2245826 | 0.8630112 | FOXN1     |
| cg03003745 | 0.3651375 | -107.0537 | -0.2249396 | 0.590077  | UNQ473    |
| cg15743985 | 0.4795564 | -121.1006 | -0.2250376 | 0.704594  | CD22      |
| cg08292050 | 0.5328642 | -135.9419 | -0.2250853 | 0.7579495 | SOCS4     |
| cg21686987 | 0.5510184 | -143.3158 | -0.2254597 | 0.7764781 | CTRB1     |
| cg24825722 | 0.370164  | -107.9484 | -0.2255535 | 0.5957175 | ACADVL    |
| cg08475088 | 0.6229246 | -184.8049 | -0.2255741 | 0.8484987 | NALP9     |
| cg17706173 | 0.2115145 | -117.8896 | -0.2269055 | 0.43842   | C16orf30  |
| cg01718139 | 0.5387414 | -141.1574 | -0.2270525 | 0.7657939 | UNQ3033   |
| cg12061127 | 0.4414831 | -116.9312 | -0.2272817 | 0.6687647 | WFDC9     |
| cg01657380 | 0.4423485 | -117.3541 | -0.2275237 | 0.6698722 | NPFF      |
| cg04353769 | 0.3860098 | -111.2491 | -0.2277761 | 0.6137858 | MS4A6A    |
| cg04810997 | 0.4436172 | -117.9047 | -0.2278185 | 0.6714357 | TAS2R60   |
| cg20516209 | 0.4050753 | -113.231  | -0.2280563 | 0.6331316 | EMILIN1   |
| cg11113534 | 0.6278597 | -194.5688 | -0.2281136 | 0.8559733 | C20orf70  |
| cg03552103 | 0.3424432 | -110.0193 | -0.2283302 | 0.5707734 | 09-sep    |
| cg03343942 | 0.3084583 | -110.2174 | -0.2283468 | 0.5368052 | SLC39A5   |
| cg19561774 | 0.6307744 | -197.6814 | -0.2284714 | 0.8592458 | SLC22A2   |
| cg15741706 | 0.4665893 | -122.8526 | -0.2284728 | 0.6950621 | CXorf48   |
| cg15648315 | 0.4892918 | -128.0956 | -0.2285773 | 0.717869  | FLJ26443  |
| cg07595943 | 0.6881645 | -264.5584 | -0.228628  | 0.9167925 | LOC161931 |
| cg25033144 | 0.5031922 | -132.8832 | -0.229444  | 0.7326362 | FLJ00060  |
| cg11015241 | 0.6312377 | -201.2694 | -0.229777  | 0.8610147 | ATP10A    |
| cg25013053 | 0.4673476 | -124.8361 | -0.2298452 | 0.6971928 | UNC45B    |
| cg20512303 | 0.3909269 | -114.5527 | -0.2303395 | 0.6212664 | PDLIM4    |
| cg05755354 | 0.32849   | -112.0398 | -0.2303857 | 0.5588757 | FRMD4A    |
| cg23412777 | 0.4120054 | -116.8761 | -0.2305167 | 0.6425221 | PYGO1     |
| cg01668126 | 0.4563234 | -123.7503 | -0.2307048 | 0.6870282 | MSR1      |
| cg06539449 | 0.5082976 | -136.785  | -0.2310016 | 0.7392992 | CCND1     |
| cg22784047 | 0.4555395 | -124.0675 | -0.2310584 | 0.6865979 | MVP       |

|            |           |           |            |           |           |
|------------|-----------|-----------|------------|-----------|-----------|
| cg15542496 | 0.4970473 | -133.6823 | -0.2312081 | 0.7282554 | PIP       |
| cg27257987 | 0.4155802 | -118.3483 | -0.2314407 | 0.6470209 | PSG4      |
| cg27087809 | 0.5206755 | -141.5645 | -0.2314756 | 0.7521511 | ACSBG1    |
| cg26777475 | 0.366119  | -114.4613 | -0.2317276 | 0.5978466 | PCOLCE    |
| cg16626670 | 0.4142594 | -118.7855 | -0.2319468 | 0.6462061 | CLEC4G    |
| cg25957124 | 0.2950555 | -114.6432 | -0.2321633 | 0.5272189 | DNAH3     |
| cg12970081 | 0.3434562 | -114.2474 | -0.232242  | 0.5756982 | GPR32     |
| cg14238120 | 0.4804035 | -130.8422 | -0.2322963 | 0.7126997 | ELA3A     |
| cg05556717 | 0.3666343 | -115.1599 | -0.2323158 | 0.5989501 | CCL26     |
| cg10275770 | 0.2071534 | -124.8069 | -0.2329015 | 0.4400549 | ICAM2     |
| cg01515887 | 0.495783  | -135.9419 | -0.2329609 | 0.7287439 | SAA2      |
| cg14256699 | 0.6267931 | -206.4446 | -0.2335956 | 0.8603887 | SOST      |
| cg26705561 | 0.3087689 | -115.8292 | -0.2336895 | 0.5424584 | SEC31L2   |
| cg05671018 | 0.4453302 | -126.0472 | -0.2340518 | 0.679382  | LYSMD2    |
| cg23413307 | 0.410001  | -120.9256 | -0.2341447 | 0.6441457 | LCE1F     |
| cg16377880 | 0.3630417 | -117.2756 | -0.2343704 | 0.5974121 | CYP4F3    |
| cg26415633 | 0.2331165 | -122.4237 | -0.2344994 | 0.4676159 | KLK1      |
| cg12022621 | 0.3160466 | -116.8238 | -0.2346926 | 0.5507392 | LAX1      |
| cg07824742 | 0.5242762 | -148.0895 | -0.234795  | 0.7590712 | DBH       |
| cg00594952 | 0.3301486 | -116.8704 | -0.2348033 | 0.564952  | RIMS3     |
| cg26264314 | 0.5142482 | -145.0014 | -0.2351853 | 0.7494335 | NALP5     |
| cg06351503 | 0.4511709 | -128.8737 | -0.2354574 | 0.6866283 | RDBP      |
| cg10190509 | 0.5384123 | -155.6749 | -0.2359114 | 0.7743237 | CCL16     |
| cg01015871 | 0.3806767 | -120.2864 | -0.2360651 | 0.6167418 | MT4       |
| cg25119415 | 0.4515362 | -130.0893 | -0.2364048 | 0.687941  | MNDA      |
| cg05348870 | 0.5320689 | -155.449  | -0.2373275 | 0.7693964 | TNFSF14   |
| cg26353877 | 0.5160167 | -149.4981 | -0.2375612 | 0.7535778 | APCS      |
| cg06436504 | 0.4320759 | -128.2192 | -0.2375648 | 0.6696407 | DOC1      |
| cg00334507 | 0.3865867 | -122.7392 | -0.2377162 | 0.6243029 | MVP       |
| cg16175263 | 0.3250998 | -120.0983 | -0.2378298 | 0.5629296 | TNFRSF10C |
| cg18508525 | 0.5737905 | -177.3036 | -0.237962  | 0.8117525 | CD36      |
| cg04143809 | 0.3333475 | -120.9256 | -0.2385047 | 0.5718522 | FLJ39822  |
| cg02351381 | 0.225666  | -127.6959 | -0.2385285 | 0.4641945 | C12orf34  |
| cg11825652 | 0.3430074 | -121.1367 | -0.2385412 | 0.5815486 | CAV2      |
| cg03557698 | 0.6306412 | -222.819  | -0.2385713 | 0.8692125 | C1orf177  |
| cg10062065 | 0.4197063 | -127.6959 | -0.2386449 | 0.6583511 | APEG1     |
| cg12334759 | 0.4592131 | -134.9015 | -0.238757  | 0.6979702 | C19orf19  |
| cg19047670 | 0.4298203 | -129.458  | -0.2388453 | 0.6686655 | CCND1     |
| cg24541550 | 0.3345642 | -121.2937 | -0.2388599 | 0.5734241 | MRVI1     |
| cg19304352 | 0.553628  | -168.0886 | -0.2389381 | 0.7925661 | DEFA4     |
| cg15422147 | 0.4489853 | -133.6743 | -0.2394682 | 0.6884536 | SERPINB5  |
| cg10414946 | 0.3912926 | -125.5634 | -0.2396667 | 0.6309593 | MS4A2     |
| cg12040555 | 0.6527676 | -251.0325 | -0.2397373 | 0.8925049 | MGMT      |
| cg16964535 | 0.6697609 | -273.901  | -0.2397531 | 0.9095141 | DNAJC5G   |
| cg12815142 | 0.4361942 | -131.7939 | -0.2399316 | 0.6761258 | SPAG7     |

|            |           |           |            |           |           |
|------------|-----------|-----------|------------|-----------|-----------|
| cg09467501 | 0.1313804 | -152.9773 | -0.2407327 | 0.3721131 | PYY       |
| cg23260026 | 0.2655411 | -125.6736 | -0.2407849 | 0.506326  | FSTL3     |
| cg25372195 | 0.4171788 | -130.0893 | -0.2409036 | 0.6580823 | DCD       |
| cg16772207 | 0.3790722 | -126.2265 | -0.2411598 | 0.620232  | MYT1      |
| cg27235662 | 0.5157973 | -155.6576 | -0.2413331 | 0.7571304 | CLDN16    |
| cg09448880 | 0.3975486 | -128.2686 | -0.2414248 | 0.6389734 | PGLYRP3   |
| cg04505023 | 0.4580215 | -138.7678 | -0.2417214 | 0.6997429 | SPRR1A    |
| cg21457804 | 0.5082275 | -154.4301 | -0.2422871 | 0.7505146 | CT45-2    |
| cg08634024 | 0.5760449 | -187.8101 | -0.2424225 | 0.8184674 | OR2F1     |
| cg17907567 | 0.3791381 | -127.9771 | -0.2426554 | 0.6217936 | HAMP      |
| cg20551517 | 0.5167314 | -158.2428 | -0.2426983 | 0.7594296 | GIP       |
| cg08448751 | 0.4183195 | -133.0514 | -0.2431228 | 0.6614423 | SEMA3G    |
| cg07126559 | 0.5157496 | -159.3563 | -0.2435603 | 0.7593099 | SGCG      |
| cg10805676 | 0.4696054 | -144.4022 | -0.2437196 | 0.7133251 | MRPL28    |
| cg15928132 | 0.3632918 | -128.698  | -0.2442752 | 0.607567  | CCKAR     |
| cg19917856 | 0.268276  | -129.4705 | -0.2445798 | 0.5128558 | LOC342897 |
| cg12582965 | 0.6133359 | -223.8487 | -0.2455336 | 0.8588696 | ATP10A    |
| cg11380128 | 0.4875372 | -153.3238 | -0.2460172 | 0.7335544 | PRLH      |
| cg06501790 | 0.4219672 | -137.6178 | -0.2460794 | 0.6680466 | SLC34A1   |
| cg01550148 | 0.3011    | -129.777  | -0.2463311 | 0.5474311 | H2AFY     |
| cg22901840 | 0.4934376 | -156.0337 | -0.2465378 | 0.7399755 | DIRAS3    |
| cg24901474 | 0.3049259 | -130.0893 | -0.2466944 | 0.5516204 | RGS5      |
| cg17788013 | 0.4506744 | -144.2937 | -0.2468404 | 0.6975147 | SPINK5    |
| cg23776892 | 0.5296398 | -171.3389 | -0.2470328 | 0.7766726 | MAGEA1    |
| cg03221619 | 0.305986  | -130.718  | -0.2473058 | 0.5532917 | FCER2     |
| cg05215575 | 0.3175384 | -130.8422 | -0.2475054 | 0.5650438 | FLJ25410  |
| cg09701102 | 0.5053974 | -162.3105 | -0.2477245 | 0.7531219 | NDUFV1    |
| cg24670715 | 0.251518  | -134.8984 | -0.248125  | 0.4996431 | ANGPT2    |
| cg13204181 | 0.3827667 | -135.339  | -0.2483997 | 0.6311664 | GH1       |
| cg05444024 | 0.6032271 | -222.7355 | -0.2486218 | 0.8518489 | FUT6      |
| cg15905124 | 0.5224634 | -171.1919 | -0.2487279 | 0.7711913 | MGC13034  |
| cg14179628 | 0.3898602 | -137.0334 | -0.2490926 | 0.6389529 | TCEAL7    |
| cg23444894 | 0.4934781 | -160.5821 | -0.2493123 | 0.7427903 | UNQ5810   |
| cg00344709 | 0.5260019 | -173.9728 | -0.249437  | 0.7754389 | ANKRD21   |
| cg17687962 | 0.4870034 | -159.9724 | -0.2502748 | 0.7372782 | KLK3      |
| cg16794682 | 0.5029283 | -166.0949 | -0.2505174 | 0.7534457 | CCND1     |
| cg19982860 | 0.3783564 | -138.3831 | -0.2511192 | 0.6294757 | IFNA21    |
| cg06101324 | 0.2442887 | -139.0736 | -0.2511348 | 0.4954236 | SPRR1A    |
| cg10894512 | 0.3823261 | -139.4167 | -0.2516526 | 0.6339787 | ACTA2     |
| cg19728223 | 0.2859054 | -137.4076 | -0.2524733 | 0.5383787 | KCNQ1     |
| cg06123346 | 0.3672938 | -139.3087 | -0.2527013 | 0.6199951 | ATP4A     |
| cg25214346 | 0.4013285 | -143.3661 | -0.2528375 | 0.654166  | NR1I3     |
| cg19368582 | 0.3940186 | -142.6183 | -0.2530137 | 0.6470323 | MMRN2     |
| cg05670596 | 0.2345363 | -142.6471 | -0.2532799 | 0.4878161 | CCRL2     |
| cg22374142 | 0.2442381 | -141.7802 | -0.2534384 | 0.4976765 | HSF4      |

|            |           |           |            |           |          |
|------------|-----------|-----------|------------|-----------|----------|
| cg07997737 | 0.3185152 | -138.3831 | -0.2537774 | 0.5722926 | NRTN     |
| cg04744379 | 0.4895775 | -167.2278 | -0.254184  | 0.7437615 | KLK15    |
| cg26063872 | 0.387983  | -143.6726 | -0.2544212 | 0.6424041 | DEFB123  |
| cg19403023 | 0.2965997 | -139.8691 | -0.254903  | 0.5515027 | TESSP1   |
| cg14333565 | 0.536292  | -190.1143 | -0.2551746 | 0.7914666 | NRTN     |
| cg21948655 | 0.5430785 | -195.2163 | -0.2557951 | 0.7988736 | SMCP     |
| cg24992780 | 0.5419066 | -196.4265 | -0.2567647 | 0.7986712 | OR7C1    |
| cg20544605 | 0.4009073 | -148.8268 | -0.2567939 | 0.6577012 | SORBS2   |
| cg15780361 | 0.2945248 | -142.3265 | -0.2568659 | 0.5513908 | ALS2CR11 |
| cg16990174 | 0.2900146 | -143.1223 | -0.2574735 | 0.547488  | RYBP     |
| cg13578652 | 0.3769964 | -147.4308 | -0.2581331 | 0.6351296 | UBASH3A  |
| cg01643624 | 0.4684879 | -166.5739 | -0.2581371 | 0.726625  | C11orf16 |
| cg12513481 | 0.3006208 | -145.5079 | -0.2596418 | 0.5602626 | SCAP1    |
| cg19954000 | 0.2421568 | -149.4981 | -0.2598295 | 0.5019863 | FGF1     |
| cg18149207 | 0.4728476 | -171.9121 | -0.2605035 | 0.7333511 | RORC     |
| cg10758292 | 0.5091185 | -187.1207 | -0.2607402 | 0.7698587 | DEFA1    |
| cg14845091 | 0.3638223 | -149.6352 | -0.2608417 | 0.624664  | ADPRHL1  |
| cg04323365 | 0.4827223 | -177.1717 | -0.2614417 | 0.744164  | GJB1     |
| cg10604646 | 0.2750632 | -149.4981 | -0.2620851 | 0.5371482 | RGS5     |
| cg06536578 | 0.3878182 | -154.6989 | -0.2623273 | 0.6501456 | JPH4     |
| cg15652212 | 0.4309971 | -162.9203 | -0.2623783 | 0.6933754 | FLJ90586 |
| cg08573687 | 0.4181424 | -160.3895 | -0.2625748 | 0.6807172 | TH       |
| cg09426307 | 0.3848561 | -154.6791 | -0.2625929 | 0.647449  | SEC14L3  |
| cg14173523 | 0.3980212 | -156.6852 | -0.2626538 | 0.660675  | FUT5     |
| cg03602500 | 0.4679465 | -174.0647 | -0.2627509 | 0.7306974 | FLJ00060 |
| cg04816348 | 0.6031593 | -261.4301 | -0.2631083 | 0.8662676 | CLEC4G   |
| cg04144768 | 0.4159607 | -160.7468 | -0.2631422 | 0.6791029 | DDC      |
| cg21372914 | 0.4495877 | -171.1919 | -0.2644405 | 0.7140282 | CLEC4M   |
| cg22264436 | 0.4821696 | -182.7407 | -0.2647232 | 0.7468928 | SOST     |
| cg14366490 | 0.3721351 | -156.8844 | -0.2654231 | 0.6375582 | TXNL6    |
| cg17829936 | 0.4199609 | -165.2    | -0.2654809 | 0.6854419 | TAAR5    |
| cg14706739 | 0.4266823 | -167.2555 | -0.2658937 | 0.6925761 | EPB49    |
| cg01894895 | 0.5117868 | -199.5271 | -0.2665166 | 0.7783033 | ANXA1    |
| cg19728577 | 0.5061343 | -197.227  | -0.2668219 | 0.7729563 | GUCA2B   |
| cg23815000 | 0.4602005 | -178.5933 | -0.2669947 | 0.7271953 | LCN1     |
| cg19807685 | 0.4081664 | -165.6518 | -0.2674447 | 0.6756111 | HSD17B2  |
| cg16122592 | 0.3730304 | -160.0336 | -0.2675244 | 0.6405548 | MAGEB6   |
| cg07597976 | 0.317753  | -155.8468 | -0.2675413 | 0.5852943 | CD19     |
| cg05556202 | 0.489859  | -192.2386 | -0.2681602 | 0.7580193 | TM4SF19  |
| cg06233503 | 0.2957712 | -156.6095 | -0.2682343 | 0.5640055 | KCNQ1    |
| cg26292028 | 0.4205188 | -171.465  | -0.2694685 | 0.6899872 | FLJ37587 |
| cg00321478 | 0.3866285 | -165.3831 | -0.2698684 | 0.6564969 | CRB1     |
| cg02067021 | 0.4186682 | -171.7041 | -0.2699116 | 0.6885798 | DNAJC5B  |
| cg01827098 | 0.5243971 | -215.362  | -0.2707103 | 0.7951075 | GIMAP7   |
| cg08626653 | 0.4400897 | -178.8424 | -0.2709099 | 0.7109996 | FLJ37538 |

|            |           |           |            |           |            |
|------------|-----------|-----------|------------|-----------|------------|
| cg01335367 | 0.2521847 | -162.5771 | -0.2711662 | 0.5233509 | C12orf34   |
| cg13521229 | 0.2817253 | -161.0258 | -0.2713943 | 0.5531197 | JOSD2      |
| cg26927807 | 0.4221363 | -175.0013 | -0.2715163 | 0.6936526 | BTBD2      |
| cg27619475 | 0.2848877 | -161.17   | -0.2715984 | 0.5564861 | SLC16A5    |
| cg08453096 | 0.5537253 | -239.3138 | -0.2721671 | 0.8258924 | ABCG5      |
| cg01119135 | 0.6062474 | -292.7625 | -0.2724242 | 0.8786716 | C1orf116   |
| cg11984608 | 0.5237565 | -221.0501 | -0.2734929 | 0.7972494 | CLDN16     |
| cg25813714 | 0.5683712 | -259.9207 | -0.2752225 | 0.8435937 | CYP4F12    |
| cg27285599 | 0.4862854 | -204.3294 | -0.275295  | 0.7615805 | FLJ13841   |
| cg08450982 | 0.3133986 | -166.1987 | -0.2753389 | 0.5887374 | NUMBL      |
| cg20334738 | 0.3731896 | -171.8727 | -0.2756922 | 0.6488818 | MAB21L2    |
| cg25781162 | 0.4778703 | -202.0568 | -0.2761481 | 0.7540183 | ABCG5      |
| cg17977362 | 0.4815962 | -204.8697 | -0.2767027 | 0.7582989 | FLJ45964   |
| cg06236276 | 0.4803484 | -206.3068 | -0.2777543 | 0.7581028 | SLC22A2    |
| cg26149550 | 0.5102534 | -223.0106 | -0.2782929 | 0.7885463 | KLK15      |
| cg11161417 | 0.384891  | -178.4279 | -0.2787412 | 0.6636322 | SPACA3     |
| cg16612699 | 0.5106326 | -224.1558 | -0.2787758 | 0.7894084 | OR8B8      |
| cg03993463 | 0.563938  | -265.6174 | -0.2790184 | 0.8429564 | KCNJ15     |
| cg20154346 | 0.3572274 | -177.3036 | -0.2807587 | 0.6379861 | RAI2       |
| cg16179125 | 0.3608437 | -180.1405 | -0.2823564 | 0.6432001 | CTSZ       |
| cg24027679 | 0.4932944 | -222.819  | -0.2826695 | 0.7759639 | SLC2A7     |
| cg19949550 | 0.4558808 | -205.8167 | -0.2829422 | 0.7388231 | ASB2       |
| cg14696820 | 0.3174019 | -177.8609 | -0.2835474 | 0.6009493 | LCE1A      |
| cg12456510 | 0.3957174 | -188.8759 | -0.2838454 | 0.6795629 | TFF2       |
| cg05766474 | 0.5344491 | -253.3524 | -0.2840329 | 0.818482  | CCL16      |
| cg26672426 | 0.3413076 | -181.7499 | -0.2849174 | 0.626225  | PTGES      |
| cg01103730 | 0.4123009 | -195.1794 | -0.2850694 | 0.6973703 | IL20       |
| cg06639544 | 0.4533954 | -208.7921 | -0.2851199 | 0.7385153 | OR7A5      |
| cg13726507 | 0.5417166 | -265.8794 | -0.2867016 | 0.8284182 | CTAG2      |
| cg25221254 | 0.4384227 | -208.6    | -0.2880214 | 0.7264441 | ASAH3      |
| cg14992108 | 0.4298312 | -209.8724 | -0.2904269 | 0.7202581 | SNTB1      |
| cg13019092 | 0.4393696 | -219.5434 | -0.2934089 | 0.7327785 | PDZK1      |
| cg04138756 | 0.4870442 | -243.6324 | -0.2935864 | 0.7806306 | SPRR3      |
| cg14204735 | 0.1703869 | -209.3682 | -0.2957587 | 0.4661456 | CYB561     |
| cg14162076 | 0.532065  | -287.8008 | -0.2976884 | 0.8297534 | CLEC4D     |
| cg22021786 | 0.412874  | -219.7224 | -0.2985565 | 0.7114305 | WFDC8      |
| cg21277505 | 0.5283129 | -292.7625 | -0.3008177 | 0.8291306 | LOC284361  |
| cg15503752 | 0.420312  | -244.2118 | -0.3094171 | 0.7297292 | ST6GALNAC1 |
| cg20373326 | 0.370323  | -230.0284 | -0.3106766 | 0.6809996 | HSD17B2    |
| cg26164184 | 0.5022024 | -301.7491 | -0.3127128 | 0.8149152 | FCN2       |
| cg22575540 | 0.4419567 | -264.4109 | -0.3139027 | 0.7558594 | TRIM54     |
| cg24024214 | 0.5046818 | -316.1339 | -0.3168676 | 0.8215494 | BTNL8      |
| cg12489960 | 0.3481986 | -244.0208 | -0.3206489 | 0.6688474 | SGCB       |
| cg02442161 | 0.4235378 | -291.9978 | -0.3295893 | 0.7531271 | PI3        |
| cg15711744 | 0.4303117 | -301.5606 | -0.3322116 | 0.7625234 | ANP32D     |



|            |           |           |            |           |       |
|------------|-----------|-----------|------------|-----------|-------|
| cg25856811 | 0.3743167 | -301.3283 | -0.3436401 | 0.7179568 | SPRR3 |
| cg13021192 | 0.2487398 | -292.7625 | -0.3517762 | 0.6005161 | CTSZ  |

**Supplementary table 14. Probes differentially methylated between *VHL*-mutated tumours and normal tissue.**

| TargetID   | VHL.AVG_Beta | VHL.DiffScore | VHL.Delta Beta | normal.AVG_Beta | SYMBOL   |
|------------|--------------|---------------|----------------|-----------------|----------|
| cg02000005 | 0.5467802    | 350.6571      | 0.4078214      | 0.1389588       | CRIP1    |
| cg06204948 | 0.6026237    | 350.6571      | 0.3763087      | 0.226315        | MARK2    |
| cg13547644 | 0.5360144    | 350.6571      | 0.3612787      | 0.1747356       | ACTA1    |
| cg26509022 | 0.5556064    | 350.6571      | 0.3522311      | 0.2033753       | ALDH1A3  |
| cg13099330 | 0.5126672    | 350.6571      | 0.3487003      | 0.163967        | RBP1     |
| cg20025656 | 0.4878511    | 350.6571      | 0.3476234      | 0.1402277       | ACTA1    |
| cg06507244 | 0.7854767    | 350.6571      | 0.3389962      | 0.4464805       | DHX32    |
| cg07360692 | 0.5589018    | 350.6571      | 0.3350915      | 0.2238103       | FLJ20032 |
| cg23418591 | 0.4475849    | 350.6571      | 0.3344936      | 0.1130913       | FLJ90166 |
| cg18818531 | 0.7160312    | 350.6571      | 0.3329449      | 0.3830863       | FOSL1    |
| cg09871315 | 0.6295313    | 350.6571      | 0.3241573      | 0.305374        | HOXA2    |
| cg22628873 | 0.7767305    | 350.6571      | 0.323902       | 0.4528286       | GGT6     |
| cg01532103 | 0.3955467    | 350.6571      | 0.3200299      | 0.07551683      | BSG      |
| cg23283495 | 0.4309835    | 350.6571      | 0.3187875      | 0.1121959       | IRF6     |
| cg22392666 | 0.4826947    | 350.6571      | 0.3160658      | 0.1666288       | FXYP7    |
| cg04411625 | 0.3726659    | 350.6571      | 0.308938       | 0.06372797      | CRIP1    |
| cg23555120 | 0.5206136    | 350.6571      | 0.3070252      | 0.2135884       | NUAK1    |
| cg14611112 | 0.6953543    | 350.6571      | 0.3066743      | 0.38868         | LCN6     |
| cg15958424 | 0.5739948    | 350.6571      | 0.305484       | 0.2685107       | ACPP     |
| cg05627103 | 0.3895306    | 350.6571      | 0.3039972      | 0.08553335      | KIAA1984 |
| cg09595479 | 0.4825397    | 350.6571      | 0.3020754      | 0.1804643       | PRPH     |
| cg25936385 | 0.8582985    | 350.6571      | 0.2985719      | 0.5597265       | FAIM2    |
| cg04220579 | 0.3743143    | 350.6571      | 0.2978928      | 0.07642148      | C7orf20  |
| cg21660130 | 0.8551595    | 350.6571      | 0.2976953      | 0.5574641       | CLCNKB   |
| cg23668631 | 0.659946     | 350.6571      | 0.2956642      | 0.3642818       | CAMKK1   |
| cg14371590 | 0.6067922    | 350.6571      | 0.2950153      | 0.3117769       | SLC26A10 |
| cg01346152 | 0.5454737    | 350.6571      | 0.2944967      | 0.2509769       | DHRS3    |
| cg23855989 | 0.5133439    | 350.6571      | 0.2938649      | 0.2194789       | AQP5     |
| cg13906813 | 0.6908485    | 350.6571      | 0.2916585      | 0.3991899       | HLA-DPA1 |
| cg21608489 | 0.5324537    | 350.6571      | 0.2916502      | 0.2408035       | POU2F2   |
| cg02490034 | 0.6869414    | 350.6571      | 0.2897662      | 0.3971752       | MEST     |
| cg19224278 | 0.60417      | 350.6571      | 0.2893014      | 0.3148687       | ALDH1A3  |
| cg16363586 | 0.5994339    | 350.6571      | 0.2878244      | 0.3116095       | BST2     |
| cg02676865 | 0.4124649    | 350.6571      | 0.2875949      | 0.12487         | UBTD1    |
| cg08624249 | 0.7640241    | 350.6571      | 0.2849939      | 0.4790302       | KIAA0889 |
| cg24928687 | 0.814961     | 350.6571      | 0.2837105      | 0.5312504       | EPHX1    |
| cg16046376 | 0.6383562    | 350.6571      | 0.282903       | 0.3554532       | PC       |
| cg17296078 | 0.4009024    | 350.6571      | 0.2823689      | 0.1185335       | UBTD1    |

|            |           |          |           |            |           |
|------------|-----------|----------|-----------|------------|-----------|
| cg17998964 | 0.4446734 | 350.6571 | 0.2808821 | 0.1637913  | MARK2     |
| cg17067528 | 0.3608509 | 350.6571 | 0.2791182 | 0.08173271 | IER3      |
| cg06958537 | 0.4819647 | 350.6571 | 0.2786984 | 0.2032664  | ETS2      |
| cg12177001 | 0.7988682 | 350.6571 | 0.2781299 | 0.5207384  | IFI27     |
| cg25580076 | 0.7493984 | 350.6571 | 0.2769866 | 0.4724118  | MRPL43    |
| cg24030630 | 0.3469318 | 350.6571 | 0.2752779 | 0.07165394 | TCIRG1    |
| cg12125117 | 0.6620348 | 350.6571 | 0.2752418 | 0.386793   | GPR97     |
| cg18172186 | 0.7950819 | 350.6571 | 0.2745892 | 0.5204926  | KIAA1913  |
| cg03605761 | 0.6290042 | 350.6571 | 0.2719032 | 0.357101   | RNF126    |
| cg21685427 | 0.8173883 | 350.6571 | 0.2703825 | 0.5470058  | SGK2      |
| cg26668713 | 0.4164905 | 350.6571 | 0.2689553 | 0.1475352  | SIPA1     |
| cg07285276 | 0.7906836 | 350.6571 | 0.2686048 | 0.5220789  | RAPGEF1   |
| cg04802221 | 0.6843781 | 350.6571 | 0.2658811 | 0.418497   | LOC283849 |
| cg04369341 | 0.446823  | 350.6571 | 0.2644469 | 0.182376   | C20orf100 |
| cg27114026 | 0.794076  | 350.6571 | 0.2632771 | 0.5307989  | ELA1      |
| cg03271907 | 0.8518438 | 350.6571 | 0.263187  | 0.5886568  | MGMT      |
| cg07236190 | 0.7475592 | 350.6571 | 0.2619531 | 0.4856061  | AMDHD1    |
| cg24012708 | 0.6830876 | 350.6571 | 0.2608652 | 0.4222224  | HDHD3     |
| cg25101936 | 0.7602313 | 350.6571 | 0.2596531 | 0.5005782  | ZBTB16    |
| cg02276665 | 0.6437225 | 350.6571 | 0.2595856 | 0.384137   | CTNNA1    |
| cg13269407 | 0.373593  | 350.6571 | 0.2590289 | 0.1145642  | FLJ10945  |
| cg21604615 | 0.4158446 | 350.6571 | 0.2588251 | 0.1570196  | SYTL1     |
| cg00446235 | 0.3903458 | 350.6571 | 0.25733   | 0.1330158  | F11R      |
| cg15236866 | 0.5195864 | 350.6571 | 0.2555445 | 0.2640419  | DLX1      |
| cg21667836 | 0.4484897 | 350.6571 | 0.2551173 | 0.1933723  | PRMT8     |
| cg24385322 | 0.3231154 | 350.6571 | 0.255092  | 0.06802341 | HDAC3     |
| cg03562120 | 0.6092091 | 350.6571 | 0.2548885 | 0.3543206  | WISP2     |
| cg17901463 | 0.3818444 | 350.6571 | 0.2543964 | 0.127448   | GSTM1     |
| cg15233681 | 0.7265753 | 350.6571 | 0.2536069 | 0.4729684  | IL1R1     |
| cg04587910 | 0.4290841 | 350.6571 | 0.2532781 | 0.175806   | XLF       |
| cg05859264 | 0.6996641 | 350.6571 | 0.2526832 | 0.4469808  | MAPK13    |
| cg06974755 | 0.343507  | 350.6571 | 0.2517619 | 0.09174509 | RALGDS    |
| cg21472642 | 0.6619656 | 135.2897 | 0.2507078 | 0.4112578  | CHN2      |
| cg21716693 | 0.5313275 | 350.6571 | 0.2505149 | 0.2808126  | CPNE5     |
| cg26069745 | 0.5620016 | 135.2897 | 0.2491071 | 0.3128945  | HOXA2     |
| cg23696949 | 0.4881983 | 350.6571 | 0.2479552 | 0.2402431  | LAMC2     |
| cg17790333 | 0.73996   | 350.6571 | 0.2473316 | 0.4926285  | CYP11A1   |
| cg01103836 | 0.9220673 | 350.6571 | 0.2471091 | 0.6749582  | MYO9B     |
| cg22467567 | 0.5247633 | 350.6571 | 0.2463315 | 0.2784319  | IGFBP5    |
| cg18392482 | 0.7915623 | 350.6571 | 0.2461943 | 0.545368   | AMDHD1    |
| cg10861599 | 0.5275854 | 350.6571 | 0.2455787 | 0.2820067  | TNFSF4    |
| cg15310873 | 0.6281904 | 128.7816 | 0.2454124 | 0.382778   | C20orf85  |
| cg13901526 | 0.3882084 | 350.6571 | 0.2451569 | 0.1430515  | GYPC      |
| cg15544721 | 0.7227138 | 132.4441 | 0.2442687 | 0.4784451  | PPP1R9A   |
| cg16616769 | 0.78408   | 350.6571 | 0.2440838 | 0.5399963  | MGC35048  |

|            |           |          |           |            |          |
|------------|-----------|----------|-----------|------------|----------|
| cg27652350 | 0.3754234 | 350.6571 | 0.2438986 | 0.1315248  | ALDH1A3  |
| cg08290628 | 0.720786  | 130.8027 | 0.2428196 | 0.4779663  | CORO2B   |
| cg10559803 | 0.6416352 | 125.643  | 0.2426377 | 0.3989975  | RALGPS2  |
| cg08368934 | 0.6849035 | 127.4265 | 0.2426098 | 0.4422937  | GPR97    |
| cg06285340 | 0.8389695 | 350.6571 | 0.241966  | 0.5970035  | CYP11A1  |
| cg20833786 | 0.685462  | 126.0039 | 0.2414892 | 0.4439728  | MRGPRX3  |
| cg14897096 | 0.804754  | 350.6571 | 0.2389115 | 0.5658425  | PC       |
| cg24101578 | 0.5780081 | 122.6457 | 0.2382943 | 0.3397138  | CDH22    |
| cg13587552 | 0.7825474 | 135.2897 | 0.2378663 | 0.544681   | SCNN1D   |
| cg24459563 | 0.7211055 | 124.9699 | 0.2370632 | 0.4840423  | CACNG1   |
| cg16854606 | 0.7159671 | 124.1542 | 0.2369777 | 0.4789894  | DAND5    |
| cg07572435 | 0.8101368 | 350.6571 | 0.2361757 | 0.5739611  | LY6D     |
| cg14409083 | 0.4746226 | 135.2897 | 0.2360464 | 0.2385762  | EMP1     |
| cg16077929 | 0.7394336 | 126.0039 | 0.2355281 | 0.5039055  | CDKL1    |
| cg04956511 | 0.5097899 | 127.4265 | 0.2349548 | 0.2748351  | PTPN6    |
| cg03440267 | 0.3450326 | 350.6571 | 0.2342654 | 0.1107672  | F13A1    |
| cg12052765 | 0.3657922 | 350.6571 | 0.2339586 | 0.1318336  | CHAT     |
| cg12866859 | 0.5960355 | 116.253  | 0.2337032 | 0.3623323  | HEXIM1   |
| cg22759185 | 0.7927269 | 135.2897 | 0.2334752 | 0.5592517  | REEP6    |
| cg02168291 | 0.77415   | 129.6312 | 0.2331308 | 0.5410191  | CDH13    |
| cg20427879 | 0.4343927 | 350.6571 | 0.2329705 | 0.2014222  | EML2     |
| cg19257550 | 0.7571352 | 126.4077 | 0.2327841 | 0.5243511  | CA9      |
| cg01724150 | 0.5111367 | 124.1542 | 0.232748  | 0.2783887  | NMNAT3   |
| cg14324200 | 0.3354699 | 350.6571 | 0.2326778 | 0.1027922  | SAMD11   |
| cg13164537 | 0.8052599 | 135.2897 | 0.2318316 | 0.5734284  | CD226    |
| cg27234090 | 0.3835475 | 350.6571 | 0.2316051 | 0.1519425  | USP2     |
| cg17820591 | 0.305077  | 350.6571 | 0.2311586 | 0.07391844 | ENO3     |
| cg09191232 | 0.5594805 | 115.4733 | 0.2307949 | 0.3286856  | PAPSS1   |
| cg20541456 | 0.4488353 | 135.2897 | 0.2302135 | 0.2186218  | CYFIP2   |
| cg18230216 | 0.670675  | 112.9752 | 0.2301703 | 0.4405047  | NYX      |
| cg01683883 | 0.3311715 | 350.6571 | 0.2301329 | 0.1010387  | CMTM2    |
| cg18702197 | 0.5953789 | 111.2979 | 0.2291742 | 0.3662047  | HOXD3    |
| cg13351161 | 0.4682353 | 128.0591 | 0.2286515 | 0.2395838  | SCARA3   |
| cg07251788 | 0.7158988 | 115.3945 | 0.2285555 | 0.4873433  | CLTCL1   |
| cg07078114 | 0.5160837 | 116.4751 | 0.2272268 | 0.2888569  | FAM69B   |
| cg21237418 | 0.4138851 | 350.6571 | 0.226728  | 0.1871571  | RAB34    |
| cg26822175 | 0.839664  | 350.6571 | 0.2266902 | 0.6129738  | CRYBA4   |
| cg20648149 | 0.7195987 | 113.7113 | 0.2264574 | 0.4931413  | SYNE2    |
| cg02674804 | 0.8554491 | 350.6571 | 0.2259002 | 0.6295489  | REEP6    |
| cg01126560 | 0.6236387 | 107.167  | 0.2258373 | 0.3978014  | C9orf142 |
| cg26511075 | 0.8190647 | 135.2897 | 0.2256454 | 0.5934194  | FLJ25422 |
| cg16517394 | 0.4281176 | 132.4441 | 0.2233869 | 0.2047307  | TNFSF4   |
| cg14444710 | 0.8106821 | 129.6312 | 0.2231834 | 0.5874987  | PDPK1    |
| cg24739326 | 0.4073599 | 135.2897 | 0.2224709 | 0.1848891  | CHST8    |
| cg20439022 | 0.5907054 | 104.0072 | 0.2222416 | 0.3684638  | SLC16A8  |

|            |           |          |           |            |           |
|------------|-----------|----------|-----------|------------|-----------|
| cg25447894 | 0.4253955 | 130.8027 | 0.2218281 | 0.2035673  | CSDC2     |
| cg16393207 | 0.7131063 | 107.5086 | 0.2210477 | 0.4920586  | GDPD5     |
| cg24076884 | 0.4334815 | 126.4077 | 0.2210091 | 0.2124723  | PCDHAC2   |
| cg11319389 | 0.3738325 | 350.6571 | 0.2209202 | 0.1529123  | C20orf100 |
| cg05253327 | 0.7719323 | 117.0541 | 0.2208889 | 0.5510435  | B3GNT1    |
| cg01643580 | 0.3544478 | 350.6571 | 0.2207475 | 0.1337004  | KCNK3     |
| cg10521852 | 0.461314  | 117.4876 | 0.219773  | 0.241541   | EDG4      |
| cg03380645 | 0.8140736 | 125.643  | 0.2186121 | 0.5954615  | SFTPB     |
| cg11344614 | 0.7134748 | 104.8051 | 0.2182628 | 0.495212   | JAM2      |
| cg07044282 | 0.5895357 | 99.43771 | 0.2177761 | 0.3717596  | ANGPTL1   |
| cg20289949 | 0.4563799 | 116.058  | 0.2177697 | 0.2386102  | HAAO      |
| cg22601917 | 0.4719    | 112.401  | 0.2175808 | 0.2543193  | H6PD      |
| cg03852144 | 0.4830629 | 109.3    | 0.216811  | 0.2662518  | GLRX      |
| cg11318251 | 0.5602217 | 99.79023 | 0.2166703 | 0.3435514  | BAALC     |
| cg02506908 | 0.6391053 | 98.071   | 0.2166163 | 0.4224889  | HPD       |
| cg10978355 | 0.345729  | 350.6571 | 0.2165465 | 0.1291824  | CKMT2     |
| cg11716026 | 0.6939545 | 101.0267 | 0.216518  | 0.4774365  | H19       |
| cg19728382 | 0.7946569 | 117.8819 | 0.216278  | 0.5783789  | STC2      |
| cg01420388 | 0.6649272 | 98.27791 | 0.2157911 | 0.4491361  | FBXO2     |
| cg22536398 | 0.2590805 | 350.6571 | 0.2154402 | 0.04364023 | NTN2L     |
| cg18174542 | 0.3574583 | 350.6571 | 0.2149105 | 0.1425478  | CSDC2     |
| cg06575572 | 0.422483  | 120.6297 | 0.214504  | 0.207979   | C22orf8   |
| cg03192551 | 0.3152255 | 350.6571 | 0.2143086 | 0.1009169  | CGI-69    |
| cg06392241 | 0.3546007 | 350.6571 | 0.2135415 | 0.1410591  | NUDT4     |
| cg09539538 | 0.6588784 | 93.03526 | 0.2105636 | 0.4483148  | C20orf42  |
| cg16967583 | 0.6358476 | 91.86777 | 0.2102222 | 0.4256254  | AGXT      |
| cg20582779 | 0.4898548 | 99.9783  | 0.2098526 | 0.2800022  | KIAA1822L |
| cg25374854 | 0.7211089 | 96.85287 | 0.2088053 | 0.5123036  | ABR       |
| cg10705800 | 0.5758737 | 90.80969 | 0.2086345 | 0.3672392  | CITED4    |
| cg01026744 | 0.7540043 | 100.9583 | 0.2079632 | 0.5460411  | NAP1L5    |
| cg02008416 | 0.6937289 | 92.85449 | 0.2076769 | 0.486052   | TMEM61    |
| cg11397854 | 0.3438962 | 350.6571 | 0.2072781 | 0.1366182  | IQSEC1    |
| cg13959523 | 0.2958796 | 350.6571 | 0.2071389 | 0.0887407  | CHST8     |
| cg11492040 | 0.7024648 | 92.85449 | 0.2067472 | 0.4957176  | H19       |
| cg08077673 | 0.4145004 | 111.4276 | 0.2061107 | 0.2083898  | MEST      |
| cg11164400 | 0.4087333 | 111.9161 | 0.205231  | 0.2035022  | PPP1R9A   |
| cg07047653 | 0.7630774 | 99.83517 | 0.2048976 | 0.5581798  | AQP2      |
| cg14546153 | 0.2824153 | 350.6571 | 0.2047458 | 0.07766946 | FLJ90166  |
| cg23539753 | 0.3833206 | 119.3316 | 0.2046309 | 0.1786897  | SP100     |
| cg18055007 | 0.4147924 | 108.5021 | 0.2039827 | 0.2108097  | DDAH2     |
| cg25483003 | 0.4035435 | 111.4276 | 0.2037556 | 0.1997879  | ENTPD2    |
| cg24511869 | 0.265835  | 350.6571 | 0.2035269 | 0.06230804 | RELB      |
| cg06197492 | 0.786277  | 103.0036 | 0.2030685 | 0.5832085  | H19       |
| cg06750167 | 0.4933911 | 91.49889 | 0.2025723 | 0.2908188  | TESC      |
| cg03096975 | 0.3757874 | 118.6309 | 0.2022845 | 0.1735029  | EML2      |

|            |           |           |            |           |           |
|------------|-----------|-----------|------------|-----------|-----------|
| cg06791102 | 0.5858598 | 84.25738  | 0.2020429  | 0.3838169 | ARHGAP4   |
| cg12091331 | 0.3832113 | 115.4903  | 0.2019289  | 0.1812824 | PLAT      |
| cg13055001 | 0.384516  | 114.9578  | 0.2018466  | 0.1826694 | PPP1CA    |
| cg22487322 | 0.8040839 | 106.2032  | 0.2017063  | 0.6023775 | IL20RA    |
| cg27360098 | 0.4957058 | 89.84649  | 0.2012706  | 0.2944352 | ELN       |
| cg08831348 | 0.4782138 | 92.12016  | 0.2011912  | 0.2770225 | EML2      |
| cg08858521 | 0.4202241 | 103.3389  | 0.2011071  | 0.219117  | WFIKKN1   |
| cg11783497 | 0.8077596 | 106.3789  | 0.2008415  | 0.606918  | IL1RN     |
| cg18342279 | 0.3070742 | 350.6571  | 0.2005869  | 0.1064874 | ZAR1      |
| cg25514304 | 0.6641119 | 84.25738  | 0.2005305  | 0.4635814 | PSEN2     |
| cg13960126 | 0.4411923 | -86.43739 | -0.2000353 | 0.6412276 | CRB3      |
| cg21755709 | 0.2762899 | -85.46435 | -0.2007811 | 0.477071  | C21orf124 |
| cg04143809 | 0.3709899 | -83.2093  | -0.2008623 | 0.5718522 | FLJ39822  |
| cg09027725 | 0.4284902 | -86.16811 | -0.2008789 | 0.6293691 | COX4I2    |
| cg12022621 | 0.3494335 | -83.35494 | -0.2013057 | 0.5507392 | LAX1      |
| cg22575540 | 0.5545133 | -108.8463 | -0.2013461 | 0.7558594 | TRIM54    |
| cg09414535 | 0.4019194 | -85.23681 | -0.2017788 | 0.6036983 | GRIP1     |
| cg02067021 | 0.486684  | -94.33327 | -0.2018958 | 0.6885798 | DNAJC5B   |
| cg27090216 | 0.15599   | -105.4432 | -0.2021004 | 0.3580904 | TNFRSF10C |
| cg25983380 | 0.3126112 | -85.14682 | -0.2026295 | 0.5152407 | GNAS      |
| cg17907567 | 0.4190069 | -87.28329 | -0.2027867 | 0.6217936 | HAMP      |
| cg25882366 | 0.1813372 | -100.3461 | -0.20307   | 0.3844072 | HOXB2     |
| cg25813714 | 0.6398758 | -151.7256 | -0.2037179 | 0.8435937 | CYP4F12   |
| cg16772207 | 0.4165134 | -88.02733 | -0.2037186 | 0.620232  | MYT1      |
| cg15928132 | 0.4038335 | -87.18691 | -0.2037334 | 0.607567  | CCKAR     |
| cg27257987 | 0.4430272 | -90.7382  | -0.2039937 | 0.6470209 | PSG4      |
| cg25839227 | 0.4052781 | -88.2916  | -0.2047779 | 0.610056  | ABI3      |
| cg12456510 | 0.474294  | -96.14628 | -0.2052689 | 0.6795629 | TFF2      |
| cg08878744 | 0.3094683 | -88.13448 | -0.2058692 | 0.5153375 | LCE1B     |
| cg10127415 | 0.3202752 | -87.90508 | -0.2059743 | 0.5262495 | MAGEB6    |
| cg04810997 | 0.4648467 | -96.20786 | -0.206589  | 0.6714357 | TAS2R60   |
| cg23131950 | 0.5153583 | -106.0624 | -0.2071015 | 0.7224598 | AP2S1     |
| cg13125510 | 0.2632776 | -92.21207 | -0.2071249 | 0.4704025 | C11orf44  |
| cg01015871 | 0.4093629 | -91.18626 | -0.2073789 | 0.6167418 | MT4       |
| cg16626670 | 0.4385087 | -94.15893 | -0.2076975 | 0.6462061 | CLEC4G    |
| cg18056600 | 0.1572234 | -110.5022 | -0.2077168 | 0.3649402 | ZMYND15   |
| cg13204181 | 0.4232654 | -92.8588  | -0.207901  | 0.6311664 | GH1       |
| cg01718139 | 0.557219  | -119.8071 | -0.2085749 | 0.7657939 | UNQ3033   |
| cg24506604 | 0.4963033 | -105.7533 | -0.2101859 | 0.7064892 | LOC144501 |
| cg25221254 | 0.5158291 | -110.6826 | -0.210615  | 0.7264441 | ASAH3     |
| cg00644033 | 0.706861  | -239.7324 | -0.2107055 | 0.9175664 | MUC3B     |
| cg10249734 | 0.3865685 | -93.59346 | -0.2111289 | 0.5976974 | SECTM1    |
| cg24619694 | 0.4545559 | -99.9588  | -0.2112799 | 0.6658359 | TAGLN     |
| cg24697329 | 0.5280487 | -115.1029 | -0.211531  | 0.7395797 | ARHGEF4   |
| cg14287742 | 0.5381047 | -118.1454 | -0.2116917 | 0.7497964 | BLZF1     |

|            |           |           |            |           |          |
|------------|-----------|-----------|------------|-----------|----------|
| cg07824742 | 0.5473509 | -121.1164 | -0.2117202 | 0.7590712 | DBH      |
| cg01103730 | 0.4856273 | -105.5567 | -0.211743  | 0.6973703 | IL20     |
| cg05348870 | 0.5576527 | -124.7002 | -0.2117438 | 0.7693964 | TNFSF14  |
| cg22243733 | 0.5113198 | -111.4193 | -0.2120333 | 0.7233531 | OLFML1   |
| cg06277657 | 0.2671968 | -96.7354  | -0.2123671 | 0.4795639 | DGKI     |
| cg21948655 | 0.5864288 | -137.426  | -0.2124448 | 0.7988736 | SMCP     |
| cg26884581 | 0.1845808 | -108.9183 | -0.2128018 | 0.3973826 | PYGM     |
| cg23873703 | 0.5667789 | -129.8072 | -0.2129248 | 0.7797037 | KCNAB1   |
| cg27566805 | 0.2759641 | -97.83491 | -0.2142743 | 0.4902384 | USH2A    |
| cg24939733 | 0.3948938 | -97.55991 | -0.2145369 | 0.6094307 | FLJ38159 |
| cg21457804 | 0.5355688 | -122.0496 | -0.2149458 | 0.7505146 | CT45-2   |
| cg23047271 | 0.1223429 | -129.0228 | -0.2154442 | 0.3377871 | PRICKLE2 |
| cg17741572 | 0.5812785 | -140.7538 | -0.2157611 | 0.7970396 | CFB      |
| cg10894512 | 0.4177922 | -101.0243 | -0.2161866 | 0.6339787 | ACTA2    |
| cg18530716 | 0.1243417 | -129.4841 | -0.2166048 | 0.3409466 | SLC16A11 |
| cg24516901 | 0.2480568 | -102.6197 | -0.2167011 | 0.4647579 | FLJ22746 |
| cg24884084 | 0.2130574 | -108.1505 | -0.2174709 | 0.4305283 | SPRR1B   |
| cg19384697 | 0.2827333 | -100.6838 | -0.2178504 | 0.5005838 | UPK3B    |
| cg01309153 | 0.6300664 | -176.4296 | -0.2184185 | 0.8484849 | SURF1    |
| cg00594952 | 0.3462249 | -99.94583 | -0.218727  | 0.564952  | RIMS3    |
| cg13726507 | 0.6096038 | -162.6268 | -0.2188144 | 0.8284182 | CTAG2    |
| cg15780361 | 0.3325471 | -99.98878 | -0.2188436 | 0.5513908 | ALS2CR11 |
| cg14440664 | 0.3422706 | -100.0966 | -0.2189523 | 0.5612229 | PDCD1LG2 |
| cg04273431 | 0.1701062 | -118.2531 | -0.2189622 | 0.3890684 | PRR3     |
| cg26164184 | 0.5957833 | -154.8452 | -0.2191319 | 0.8149152 | FCN2     |
| cg16176600 | 0.5151863 | -122.2168 | -0.2193382 | 0.7345245 | FRK      |
| cg24694549 | 0.4205299 | -105.319  | -0.2197708 | 0.6403007 | GRIP1    |
| cg02833725 | 0.4316808 | -107.6667 | -0.2207159 | 0.6523967 | ISG20L2  |
| cg27337148 | 0.2156696 | -111.0991 | -0.2208849 | 0.4365545 | CAMK1G   |
| cg26927807 | 0.4724464 | -114.7313 | -0.2212062 | 0.6936526 | BTBD2    |
| cg06818777 | 0.1341331 | -132.3157 | -0.2225558 | 0.3566888 | CHAD     |
| cg05670596 | 0.2647535 | -107.236  | -0.2230626 | 0.4878161 | CCRL2    |
| cg20334738 | 0.425726  | -109.7581 | -0.2231558 | 0.6488818 | MAB21L2  |
| cg25203980 | 0.5852529 | -159.4632 | -0.2246267 | 0.8098795 | CENTB5   |
| cg21372914 | 0.4889256 | -123.3136 | -0.2251026 | 0.7140282 | CLEC4M   |
| cg02397720 | 0.1208694 | -140.0461 | -0.2252849 | 0.3461542 | RAB17    |
| cg25119415 | 0.4626245 | -117.9672 | -0.2253164 | 0.687941  | MNDA     |
| cg04391540 | 0.3612602 | -107.4012 | -0.2255519 | 0.5868121 | ZNF541   |
| cg24851490 | 0.2784675 | -108.8746 | -0.2257794 | 0.5042468 | RNASE2   |
| cg09837803 | 0.2973253 | -111.3065 | -0.2291451 | 0.5264704 | IL16     |
| cg03782453 | 0.1547847 | -133.2667 | -0.2295982 | 0.3843829 | FLJ90575 |
| cg24024214 | 0.5916532 | -174.0463 | -0.2298962 | 0.8215494 | BTNL8    |
| cg16051685 | 0.5046632 | -135.2377 | -0.2305613 | 0.7352245 | TRIM63   |
| cg23881725 | 0.1985403 | -124.5514 | -0.2311435 | 0.4296838 | DLEC1    |
| cg09467501 | 0.1400947 | -140.5345 | -0.2320184 | 0.3721131 | PYY      |

|            |           |           |            |           |            |
|------------|-----------|-----------|------------|-----------|------------|
| cg00626119 | 0.303601  | -115.3569 | -0.2331855 | 0.5367865 | NTRK1      |
| cg16098726 | 0.6232243 | -207.8797 | -0.233795  | 0.8570194 | GP9        |
| cg04138756 | 0.5456438 | -158.4216 | -0.2349868 | 0.7806306 | SPRR3      |
| cg10414946 | 0.3940531 | -122.4565 | -0.2369063 | 0.6309593 | MS4A2      |
| cg24499411 | 0.422236  | -128.4821 | -0.2389346 | 0.6611706 | TNS3       |
| cg15590780 | 0.2580026 | -124.7404 | -0.2393376 | 0.4973402 | USH2A      |
| cg17910564 | 0.3399887 | -122.1296 | -0.2394713 | 0.57946   | VDAC3      |
| cg14992108 | 0.4806582 | -141.731  | -0.2395999 | 0.7202581 | SNTB1      |
| cg03251857 | 0.5682601 | -180.0853 | -0.239845  | 0.8081051 | PPAPDC3    |
| cg12489960 | 0.4289993 | -130.7036 | -0.2398481 | 0.6688474 | SGCB       |
| cg21065959 | 0.4188224 | -129.2351 | -0.2399581 | 0.6587805 | LCE1E      |
| cg00334507 | 0.3840448 | -125.5719 | -0.2402581 | 0.6243029 | MVP        |
| cg04505023 | 0.4582959 | -138.6711 | -0.241447  | 0.6997429 | SPRR1A     |
| cg06639544 | 0.4968438 | -150.2192 | -0.2416714 | 0.7385153 | OR7A5      |
| cg14696820 | 0.3584007 | -126.4067 | -0.2425486 | 0.6009493 | LCE1A      |
| cg27020690 | 0.1105422 | -164.7522 | -0.2426517 | 0.3531938 | TERC       |
| cg16990174 | 0.3034991 | -127.1891 | -0.2439889 | 0.547488  | RYBP       |
| cg19368582 | 0.4028572 | -132.4441 | -0.2441751 | 0.6470323 | MMRN2      |
| cg17820828 | 0.4796043 | -149.9318 | -0.2449361 | 0.7245404 | KCNQ1      |
| cg21717724 | 0.3362814 | -128.7816 | -0.2453195 | 0.5816008 | PSMD5      |
| cg01530101 | 0.3825043 | -131.7719 | -0.2454792 | 0.6279835 | KCNQ1DN    |
| cg03221619 | 0.3075009 | -129.1396 | -0.2457908 | 0.5532917 | FCER2      |
| cg06123346 | 0.3726311 | -133.2126 | -0.247364  | 0.6199951 | ATP4A      |
| cg22784047 | 0.4392051 | -143.0564 | -0.2473928 | 0.6865979 | MVP        |
| cg12513481 | 0.3127575 | -131.0239 | -0.2475051 | 0.5602626 | SCAP1      |
| cg08684473 | 0.5006433 | -161.8444 | -0.24774   | 0.7483833 | LILRB5     |
| cg19917856 | 0.265061  | -133.4034 | -0.2477948 | 0.5128558 | LOC342897  |
| cg00622552 | 0.1315199 | -162.3794 | -0.2478962 | 0.379416  | ODF3L1     |
| cg01993576 | 0.1414131 | -159.3175 | -0.2483435 | 0.3897566 | SLC29A1    |
| cg15626350 | 0.218858  | -139.948  | -0.248604  | 0.467462  | ESR1       |
| cg15503752 | 0.4791507 | -159.0379 | -0.2505784 | 0.7297292 | ST6GALNAC1 |
| cg19717326 | 0.1952128 | -148.7432 | -0.2521406 | 0.4473534 | MYADM      |
| cg06436504 | 0.4173086 | -145.932  | -0.2523321 | 0.6696407 | DOC1       |
| cg10275770 | 0.1867097 | -152.0804 | -0.2533452 | 0.4400549 | ICAM2      |
| cg06714705 | 0.4914002 | -170.2989 | -0.2545714 | 0.7459716 | OLFML1     |
| cg10052840 | 0.2405236 | -143.9704 | -0.2546015 | 0.4951251 | SEMA6B     |
| cg26185508 | 0.4214747 | -156.2185 | -0.2585909 | 0.6800656 | CDCP2      |
| cg04551925 | 0.6212732 | -281.2505 | -0.260051  | 0.8813242 | AQP1       |
| cg25833031 | 0.5265922 | -202.2105 | -0.2621065 | 0.7886987 | PAPD1      |
| cg19903229 | 0.2728539 | -151.044  | -0.2625493 | 0.5354032 | C14orf105  |
| cg24407065 | 0.5396824 | -213.7277 | -0.2635833 | 0.8032658 | BLZF1      |
| cg14706739 | 0.4280058 | -167.1283 | -0.2645702 | 0.6925761 | EPB49      |
| cg04144768 | 0.4122399 | -167.1283 | -0.266863  | 0.6791029 | DDC        |
| cg16179125 | 0.3759146 | -161.3132 | -0.2672855 | 0.6432001 | CTSZ       |
| cg20154346 | 0.3693581 | -162.3921 | -0.268628  | 0.6379861 | RAI2       |

|            |           |           |            |           |           |
|------------|-----------|-----------|------------|-----------|-----------|
| cg26264314 | 0.4806181 | -192.5611 | -0.2688154 | 0.7494335 | NALP5     |
| cg21541083 | 0.5375924 | -224.8784 | -0.2690037 | 0.8065962 | STXBP2    |
| cg14894144 | 0.2064777 | -172.8985 | -0.2729762 | 0.479454  | LAMA3     |
| cg24816455 | 0.2045622 | -174.0463 | -0.2735757 | 0.4781379 | SEMA3B    |
| cg07997737 | 0.2975732 | -166.6886 | -0.2747194 | 0.5722926 | NRTN      |
| cg22374142 | 0.222408  | -173.2088 | -0.2752685 | 0.4976765 | HSF4      |
| cg22341310 | 0.1533717 | -190.8205 | -0.2759618 | 0.4293335 | ZNF541    |
| cg13521229 | 0.2770494 | -169.0038 | -0.2760703 | 0.5531197 | JOSD2     |
| cg01565918 | 0.5720414 | -287.8604 | -0.2810268 | 0.8530682 | GNAS      |
| cg19728223 | 0.2517124 | -185.8537 | -0.2866663 | 0.5383787 | KCNQ1     |
| cg19954000 | 0.2137332 | -192.9937 | -0.2882531 | 0.5019863 | FGF1      |
| cg06101324 | 0.2050041 | -197.7227 | -0.2904195 | 0.4954236 | SPRR1A    |
| cg18780284 | 0.3905918 | -202.9911 | -0.2908018 | 0.6813936 | SPRR1B    |
| cg13021192 | 0.3060146 | -196.9446 | -0.2945015 | 0.6005161 | CTSZ      |
| cg01484156 | 0.2536793 | -200.5183 | -0.2964454 | 0.5501247 | NCALD     |
| cg15060813 | 0.2084816 | -213.0313 | -0.3009458 | 0.5094273 | LRFN3     |
| cg27619475 | 0.2515306 | -214.2036 | -0.3049555 | 0.5564861 | SLC16A5   |
| cg12391921 | 0.3087181 | -215.8704 | -0.3056872 | 0.6144053 | ITGB1BP2  |
| cg08450982 | 0.2792279 | -221.1291 | -0.3095095 | 0.5887374 | NUMBL     |
| cg24901474 | 0.2420335 | -222.5022 | -0.3095869 | 0.5516204 | RGS5      |
| cg02351381 | 0.1538868 | -241.5301 | -0.3103077 | 0.4641945 | C12orf34  |
| cg06536578 | 0.3374255 | -232.333  | -0.3127201 | 0.6501456 | JPH4      |
| cg10677144 | 0.3950145 | -255.2249 | -0.3162332 | 0.7112477 | MYOM1     |
| cg24670715 | 0.1770853 | -255.0376 | -0.3225577 | 0.4996431 | ANGPT2    |
| cg21277505 | 0.4919105 | -347.7558 | -0.3372201 | 0.8291306 | LOC284361 |
| cg25856811 | 0.3781078 | -303.3381 | -0.339849  | 0.7179568 | SPRR3     |
| cg10604646 | 0.1913526 | -294.273  | -0.3457956 | 0.5371482 | RGS5      |
| cg14204735 | 0.1071686 | -347.5609 | -0.358977  | 0.4661456 | CYB561    |
| cg01335367 | 0.1614577 | -333.122  | -0.3618931 | 0.5233509 | C12orf34  |
| cg21949305 | 0.3307221 | -347.7558 | -0.3945665 | 0.7252886 | ADORA2A   |
| cg22189286 | 0.2823619 | -347.7558 | -0.4085908 | 0.6909527 | HSPB8     |

**Supplementary Table 15 – 100 probes differentially methylated in *VHL*-mutated, *RET*-mutated, *NF1*-mutated tumours and tumours without known mutation.**

| Probe      | Associated gene |
|------------|-----------------|
| cg15590780 | USH2A           |
| cg14706739 | EPB49           |
| cg19917856 | LOC342897       |
| cg03782453 | FLJ90575        |
| cg21065959 | LCE1E           |
| cg14696820 | LCE1A           |
| cg06123346 | ATP4A           |
| cg14992108 | SNTB1           |



|            |            |
|------------|------------|
| cg25119415 | MNDA       |
| cg08450982 | NUMBL      |
| cg27020690 | TERC       |
| cg07824742 | DBH        |
| cg18056600 | ZMYND15    |
| cg14204735 | CYB561     |
| cg10861599 | TNFSF4     |
| cg04144768 | DDC        |
| cg23881725 | DLEC1      |
| cg13021192 | CTSZ       |
| cg08624249 | KIAA0889   |
| cg03221619 | FCER2      |
| cg15503752 | ST6GALNAC1 |
| cg13521229 | JOSD2      |
| cg06436504 | DOC1       |
| cg06639544 | OR7A5      |
| cg06507244 | DHX32      |
| cg10052840 | SEMA6B     |
| cg14409083 | EMP1       |
| cg15060813 | LRFN3      |
| cg24694549 | GRIP1      |
| cg24024214 | BTNL8      |
| cg10604646 | RGS5       |
| cg25221254 | ASAH3      |
| cg00334507 | MVP        |
| cg01103730 | IL20       |
| cg07997737 | NRTN       |
| cg19954000 | FGF1       |
| cg21457804 | CT45-2     |
| cg13726507 | CTAG2      |
| cg12022621 | LAX1       |
| cg27619475 | SLC16A5    |
| cg24851490 | RNASE2     |
| cg02351381 | C12orf34   |
| cg04810997 | TAS2R60    |
| cg16517394 | TNFSF4     |
| cg19368582 | MMRN2      |
| cg10127415 | MAGEB6     |
| cg26927807 | BTBD2      |
| cg00626119 | NTRK1      |
| cg06536578 | JPH4       |
| cg00644033 | MUC3B      |
| cg10414946 | MS4A2      |
| cg04505023 | SPRR1A     |
| cg12489960 | SGCB       |

|            |           |
|------------|-----------|
| cg00594952 | RIMS3     |
| cg21948655 | SMCP      |
| cg05670596 | CCRL2     |
| cg24901474 | RGS5      |
| cg13204181 | GH1       |
| cg10677144 | MYOM1     |
| cg21372914 | CLEC4M    |
| cg09414535 | GRIP1     |
| cg20334738 | MAB21L2   |
| cg18780284 | SPRR1B    |
| cg04138756 | SPRR3     |
| cg19717326 | MYADM     |
| cg22575540 | TRIM54    |
| cg24101578 | CDH22     |
| cg12456510 | TFF2      |
| cg22784047 | MVP       |
| cg26884581 | PYGM      |
| cg01718139 | UNQ3033   |
| cg08684473 | LILRB5    |
| cg12513481 | SCAP1     |
| cg16363586 | BST2      |
| cg24670715 | ANGPT2    |
| cg16990174 | RYBP      |
| cg09467501 | PYY       |
| cg06101324 | SPRR1A    |
| cg16179125 | CTSZ      |
| cg27257987 | PSG4      |
| cg27090216 | TNFRSF10C |
| cg14894144 | LAMA3     |
| cg16772207 | MYT1      |
| cg19728223 | KCNQ1     |
| cg01015871 | MT4       |
| cg15780361 | ALS2CR11  |
| cg15928132 | CCKAR     |
| cg02067021 | DNAJC5B   |
| cg05348870 | TNFSF14   |
| cg22374142 | HSF4      |
| cg20154346 | RAI2      |
| cg26164184 | FCN2      |
| cg25856811 | SPRR3     |
| cg09027725 | COX4I2    |
| cg01335367 | C12orf34  |
| cg10275770 | ICAM2     |
| cg01103836 | MYO9B     |
| cg17907567 | HAMP      |

|            |        |
|------------|--------|
| cg04273431 | PRR3   |
| cg16626670 | CLEC4G |

**Supplementary Table 16– Probes with AUROC > 0.7**

| Probe      | AUROC  | Average $\beta$ Malignant tumours | Average $\beta$ Benign tumours | $\Delta\beta$ |
|------------|--------|-----------------------------------|--------------------------------|---------------|
| cg13608094 | 0.7414 | 0.5319676                         | 0.702949741                    | -0.170982141  |
| cg23412777 | 0.7517 | 0.24781474                        | 0.409473493                    | -0.161658753  |
| cg00626119 | 0.8103 | 0.186285111                       | 0.3352027                      | -0.148917589  |
| cg25781162 | 0.7241 | 0.40751045                        | 0.560333634                    | -0.152823184  |
| cg05140736 | 0.7034 | 0.33142072                        | 0.442233848                    | -0.110813128  |
| cg06303238 | 0.7172 | 0.33761704                        | 0.468263393                    | -0.130646353  |
| cg07426960 | 0.7345 | 0.220085059                       | 0.339183866                    | -0.119098807  |
| cg10710439 | 0.7241 | 0.20627716                        | 0.29835841                     | -0.09208125   |
| cg09276451 | 0.7    | 0.2537176                         | 0.351672666                    | -0.097955066  |

**Supplementary table 17 – Non-tumoural contamination estimated by ASCAT for cases with available SNP array data.**

| Sample                 | Contamination % | Methylation cluster | Mutated gene | Malignant |
|------------------------|-----------------|---------------------|--------------|-----------|
| BP9_9028.2_8R03C01     | 15.0            | A                   | NF1          | X         |
| BP11_5193.1_4R08C01    | 27.0            | A                   |              | X         |
| BP9_7356.1_9R02C01*    | 17.0            | A                   |              | X         |
| BP9_5629.1_6R06C01*    | 19.0            | A                   |              | X         |
| BP9_6457.1_6R07C01*    | 20.0            | A                   |              |           |
| BP9_7095.1_8R06C01     | 20.0            | A                   |              |           |
| BP7_6359.1_4R01C01     | 22.0            | A                   |              |           |
| BP9_5178.1_4R02C01     | 25.0            | A                   |              | X         |
| BP9_6937.1_9R01C01     | 25.0            | A                   |              | X         |
| BP9_7294.1_5R07C01     | 25.0            | A                   | VHL          |           |
| BP7_9266.1_1R03C01#    | 29.0            | A                   | NF1          | X         |
| BP9_8432.2_11R02C01    | 30.0            | A                   | NF1          |           |
| BP9_9086.1_10R01C01    | 30.0            | A                   |              |           |
| BP9_7087.1_1R02C01     | 31.0            | A                   |              | X         |
| BP9_9424.1_2R06C01     | 33.0            | A                   | RET          |           |
| BP9_8592.1_12R01C01    | 34.0            | A                   | RET          |           |
| BP12_8016.1_12R04C01   | 36.0            | A                   | NF1          |           |
| BP9_6259.1_7R07C01     | 36.0            | A                   | VHL          |           |
| BP9_8120.1_7R08C01     | 43.0            | A                   | HRAS         |           |
| BP12_9263.2_12R05C01 # | 47.0            | A                   | NF1          | X         |
| BP9_7880.1_1R05C01     | 48.0            | A                   | RET          |           |
| BP9_10058.1_8R01C01    | 52.0            | A                   | RET          | X         |
| BP12_9233.1_8R08C01    | 55.0            | A                   | RET          |           |

|                     |    |      |   |      |  |
|---------------------|----|------|---|------|--|
| BP9_6511.1_5R02C01  |    | 56.0 | A |      |  |
| BP9_9045.1_9R08C01  |    | 89.0 | A |      |  |
| BP3_7307.1_1R04C01  | NA |      | A | HRAS |  |
| BP9_6601.1_6R08C01  |    | 18.0 | B | SDHB |  |
| BP9_7774.1_5R08C01  |    | 18.0 | B | RET  |  |
| BP9_7160.1_5R05C01  |    | 21.0 | B | RET  |  |
| BP7_7174.1_3R06C01  |    | 38.0 | B |      |  |
| BP7_7899.2_3R04C01  |    | 53.0 | B | VHL  |  |
| BP7_8202.1_4R06C01  |    | 56.0 | B | NF1  |  |
| BP12_6643.1_2R02C01 |    | 61.0 | B | VHL  |  |
| BP12_7810.1_7R02C01 |    | 71.0 | B | VHL  |  |
| BP9_8774.1_1R06C01  |    | 76.0 | B | VHL  |  |

**Supplemental figure 1. Extended heatmap including normal medulla**

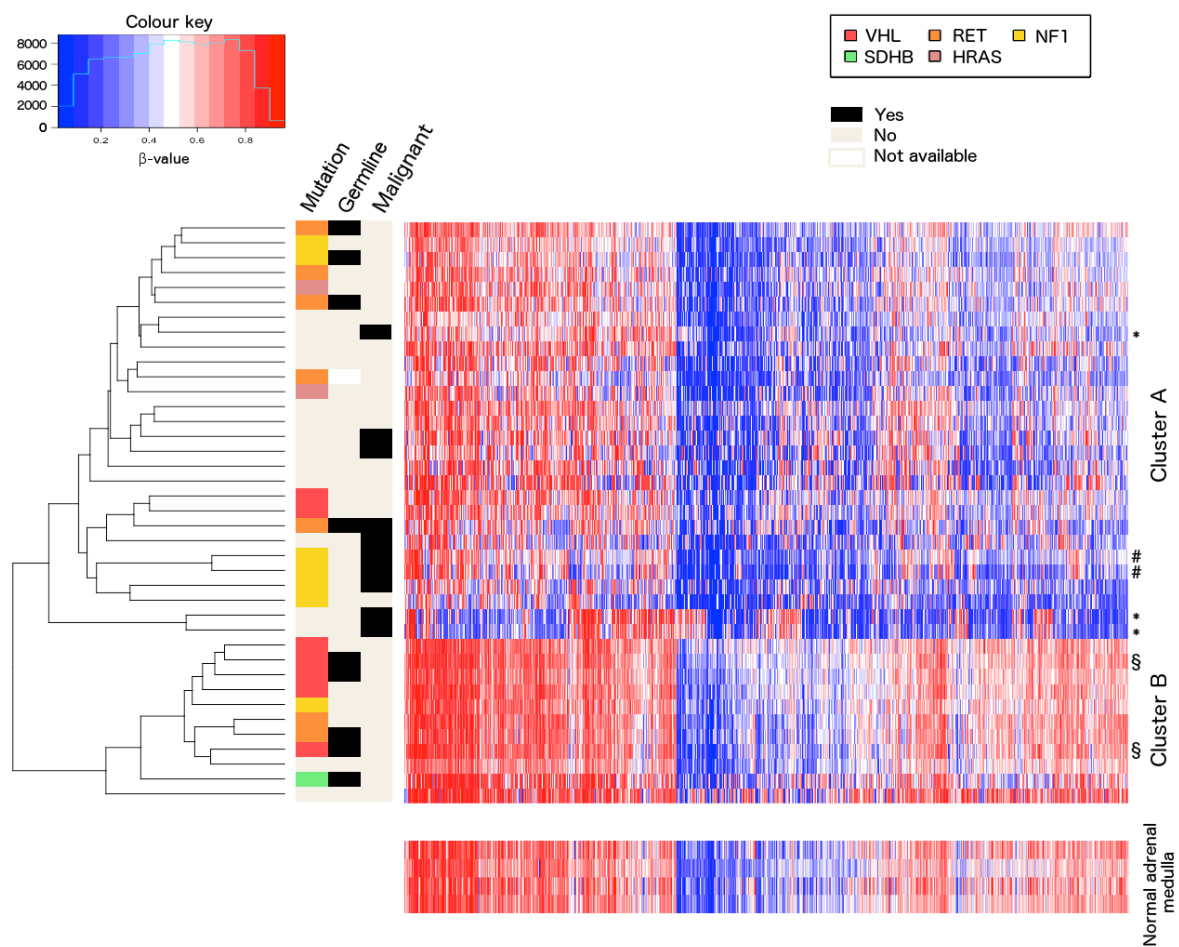

Supplemental figure 2. Kaplan-Meier survival analysis. No difference in survival is seen between the clusters.

### Survival of the methylation clusters

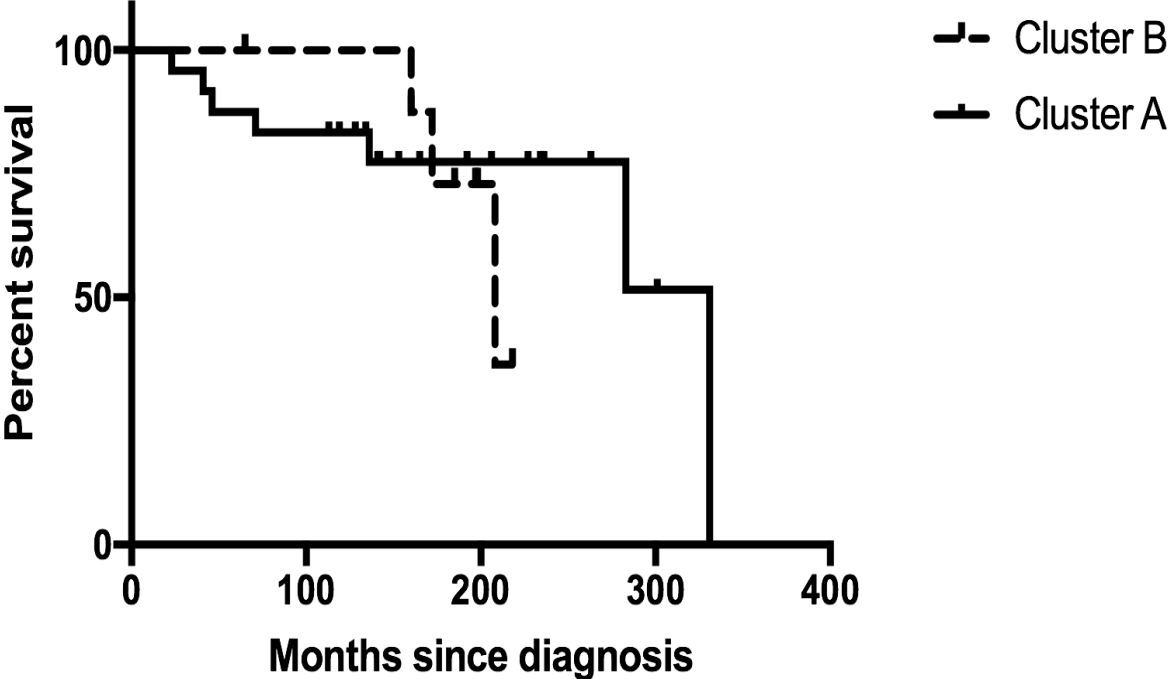

Supplemental figure 3. Venn diagram of probes differentially methylated between tumours with mutations in specific genes and normal medulla.

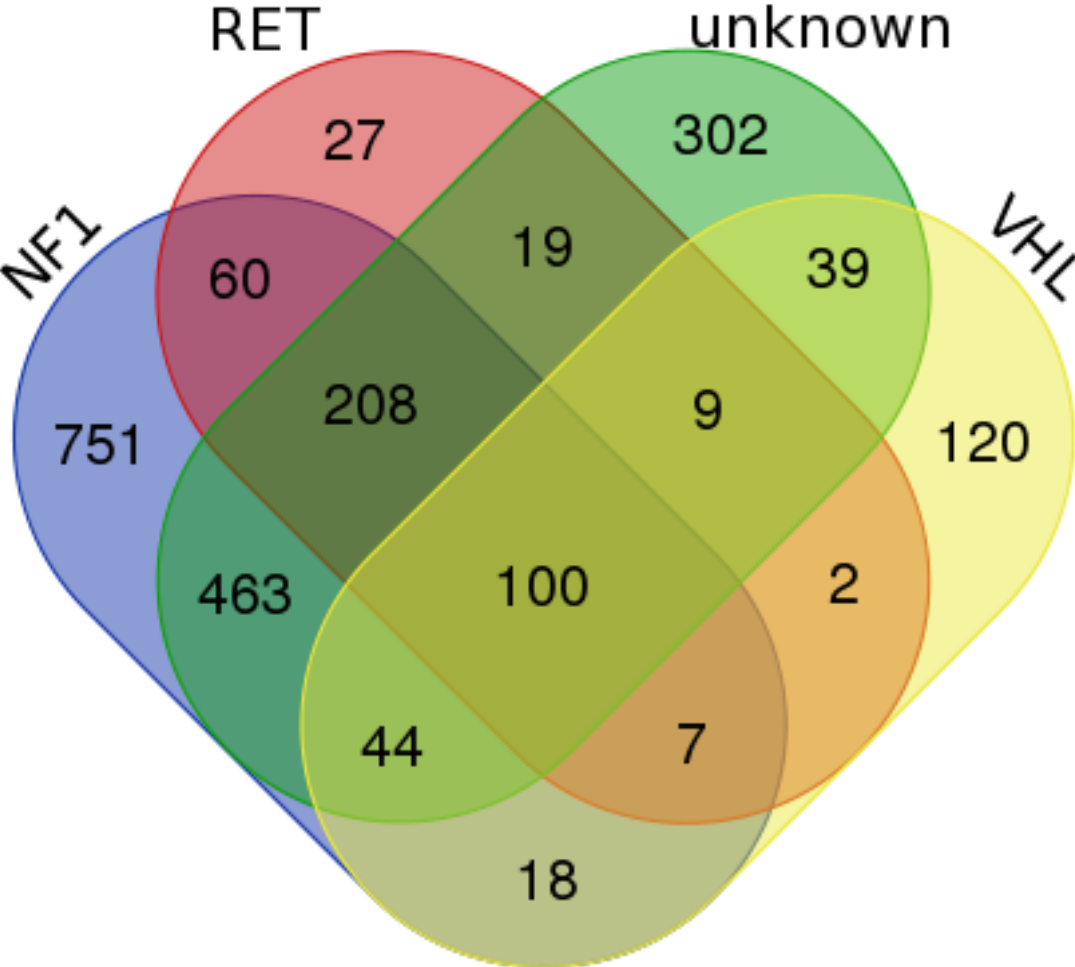

Supplemental figure 4. Somatic Copy Number Aberrations versus Methylation index

## Methylation Index vs. SCNA

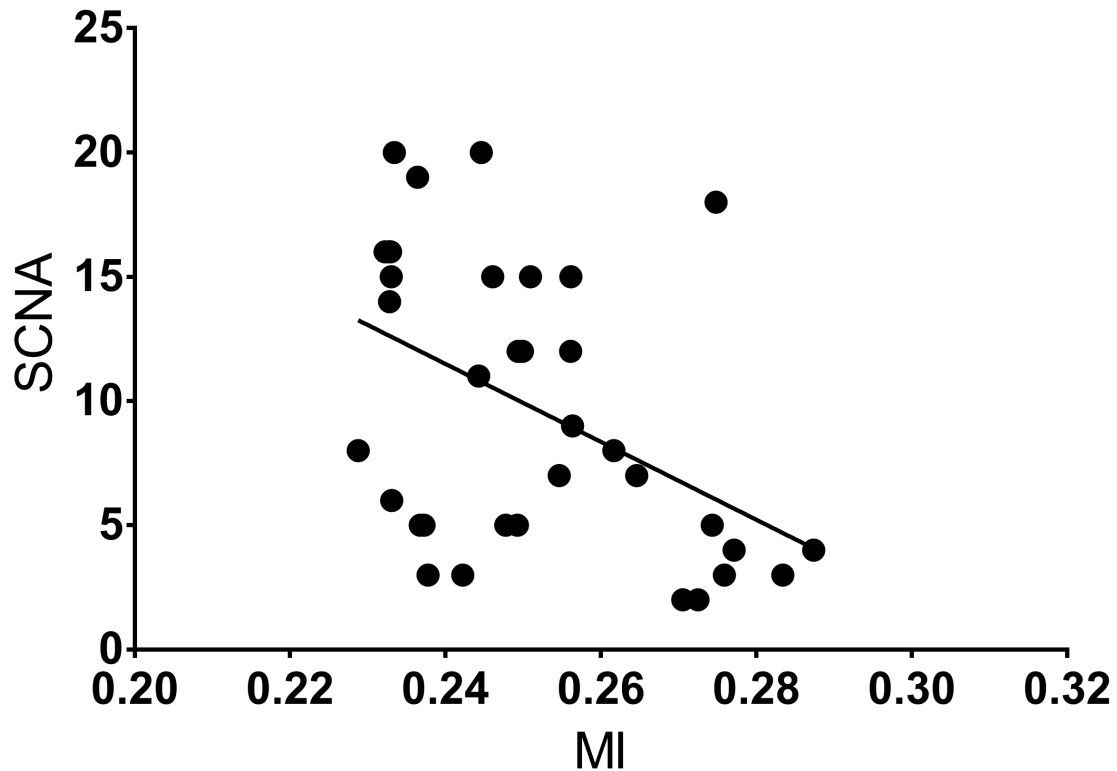

Supplemental figure 5. Heatmap for a case with multiple analysed tumours. P=Primary, M=Metastasis, R=Recurrence.

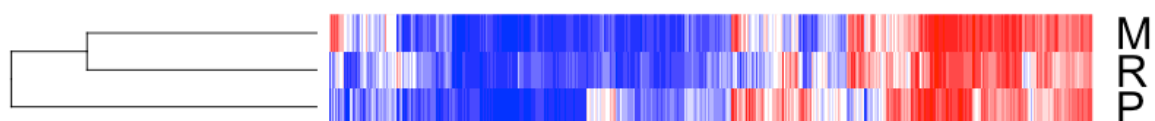

Supplemental figure 6. Heatmap for a case with multiple analysed tumours. P=Primary, M=Metastasis.

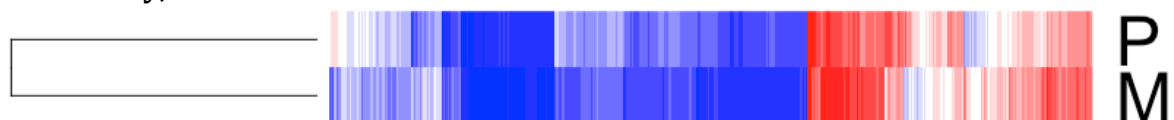

Supplemental figure 7. Heatmap for a case with multiple analysed tumours. P1 and P2 are two different primary tumours (bilateral disease).

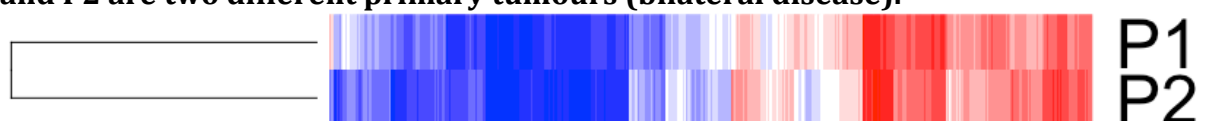

Supplemental figure 8. Relative *PNMT* expression in the two methylation clusters. No significant difference is detected.

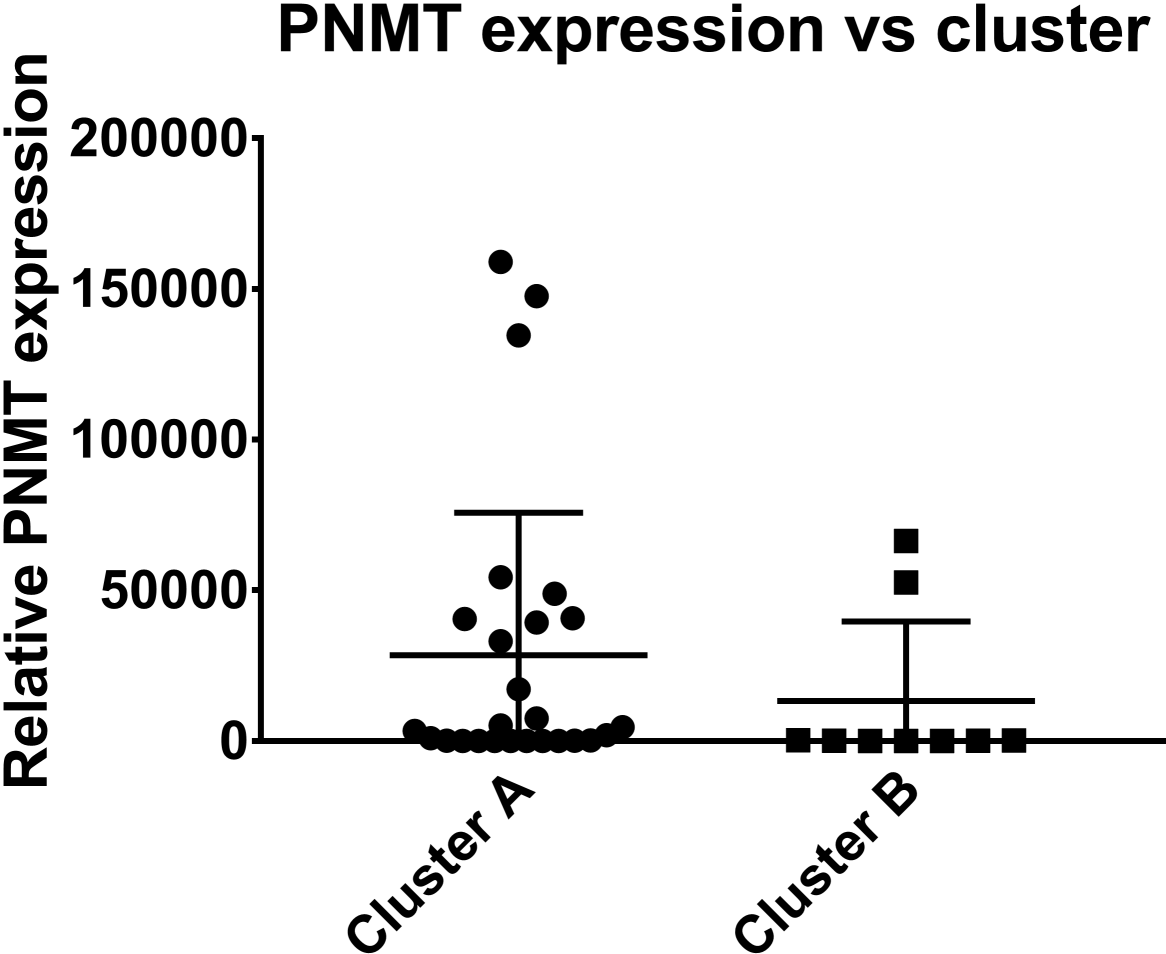



Supplemental figure 9. Relative *PNMT* expression in tumours with different mutations.

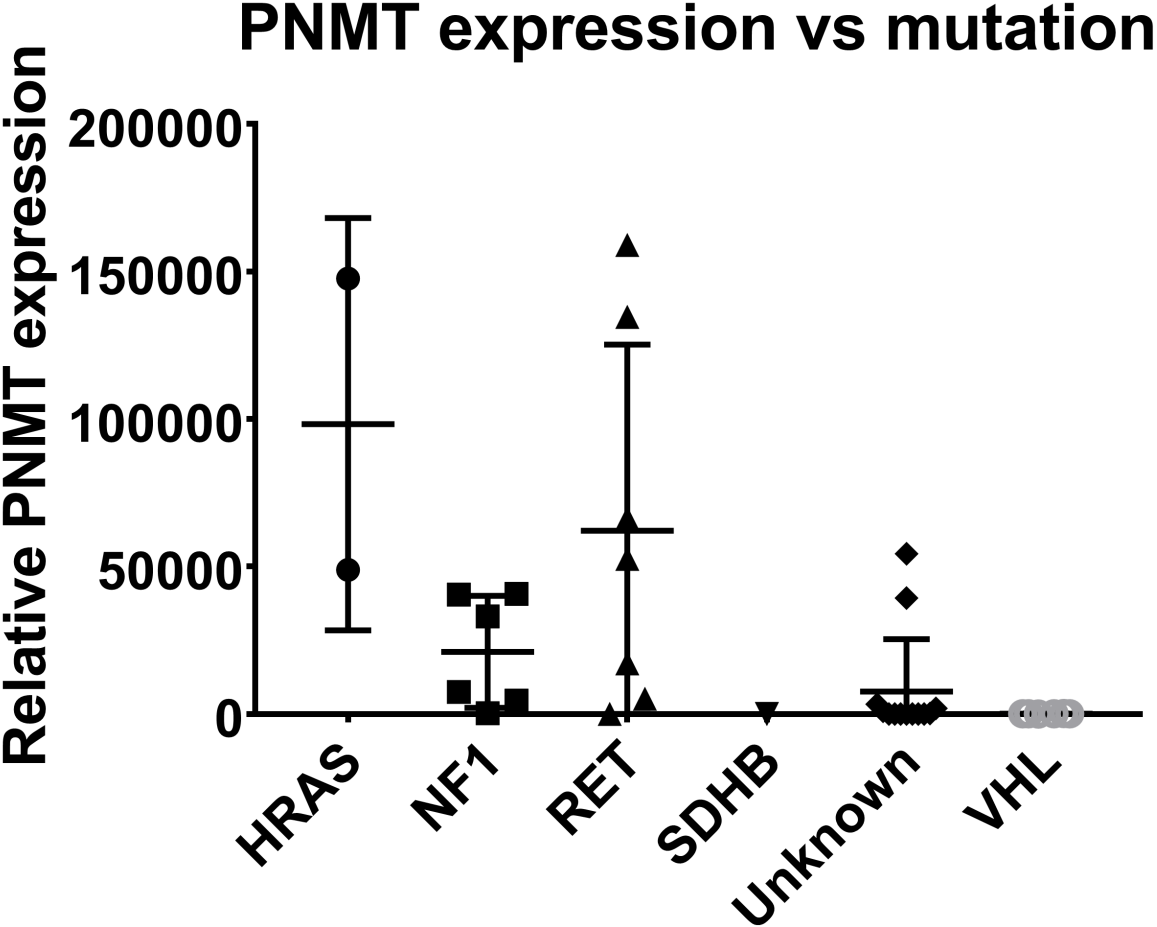

Supplement: srep44943-s1.pdf [file srep44943-s1.pdf]
